# Supplementary material for: Landscape of transcription and long non-coding RNAs reveals new insights into the inflammatory and fibrotic response following ventilator-induced lung injury
Source: Springer Nature journal article supplement (doi:10.1186/s12931-018-0822-z), 2018-06-21

A

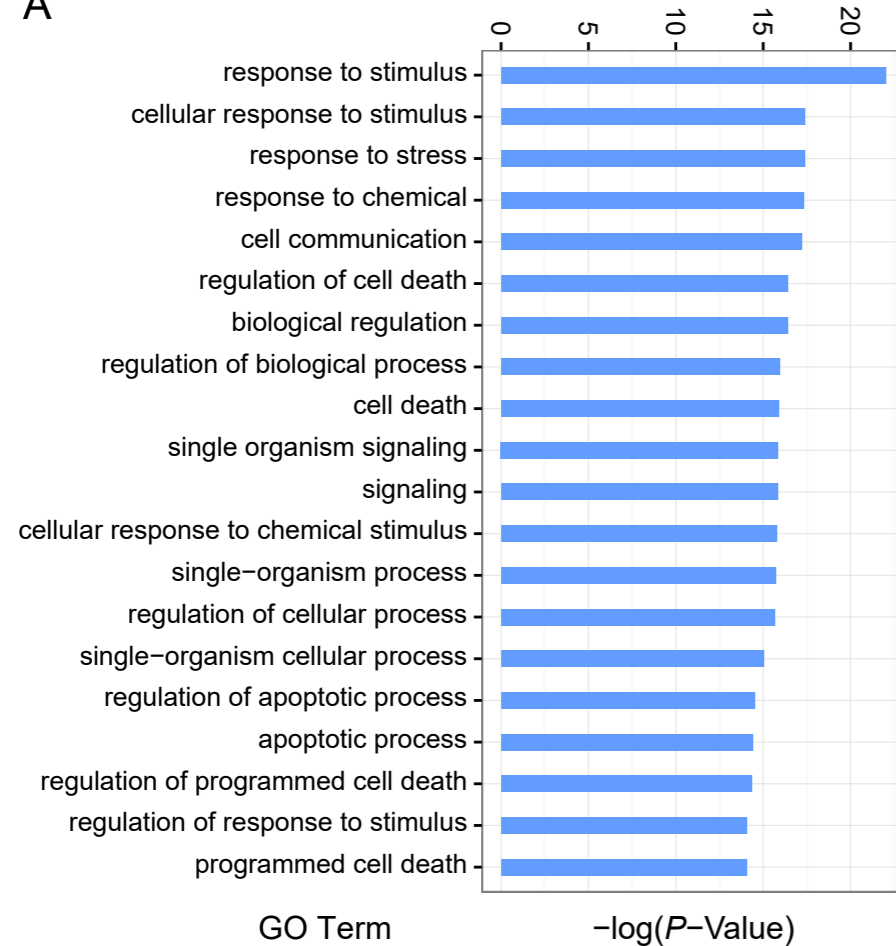

B

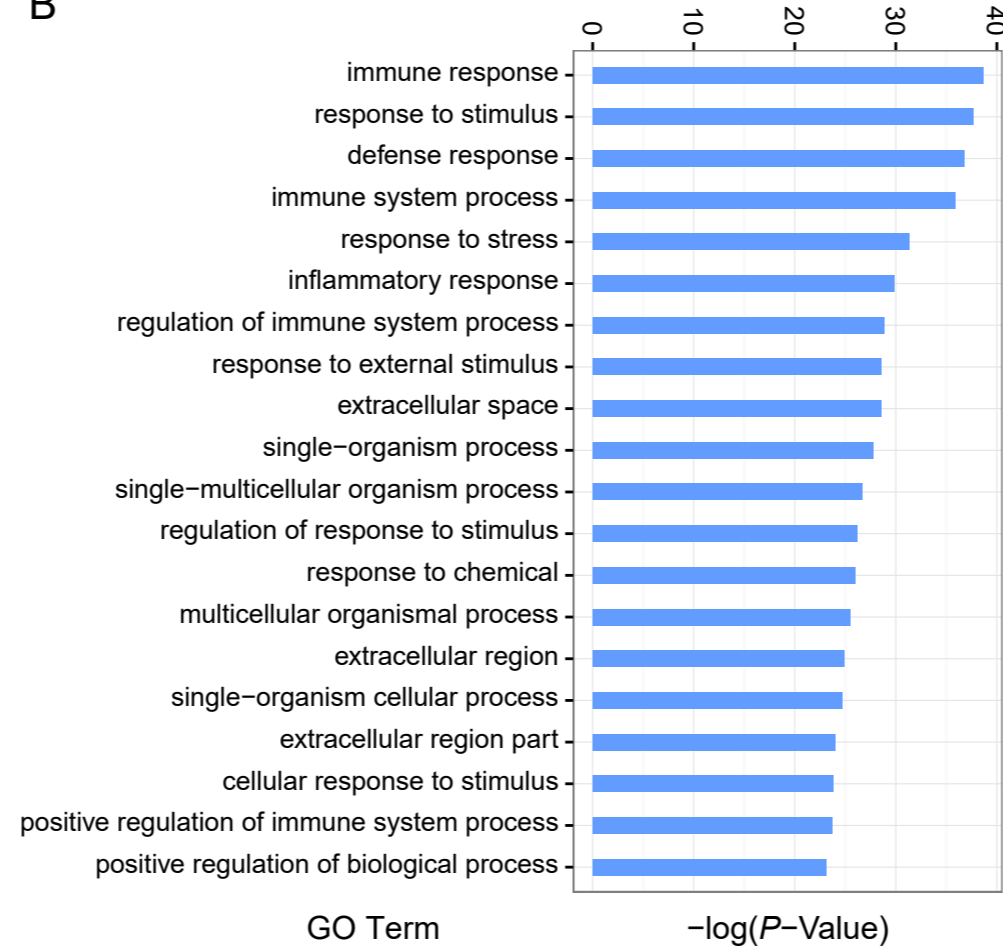

C

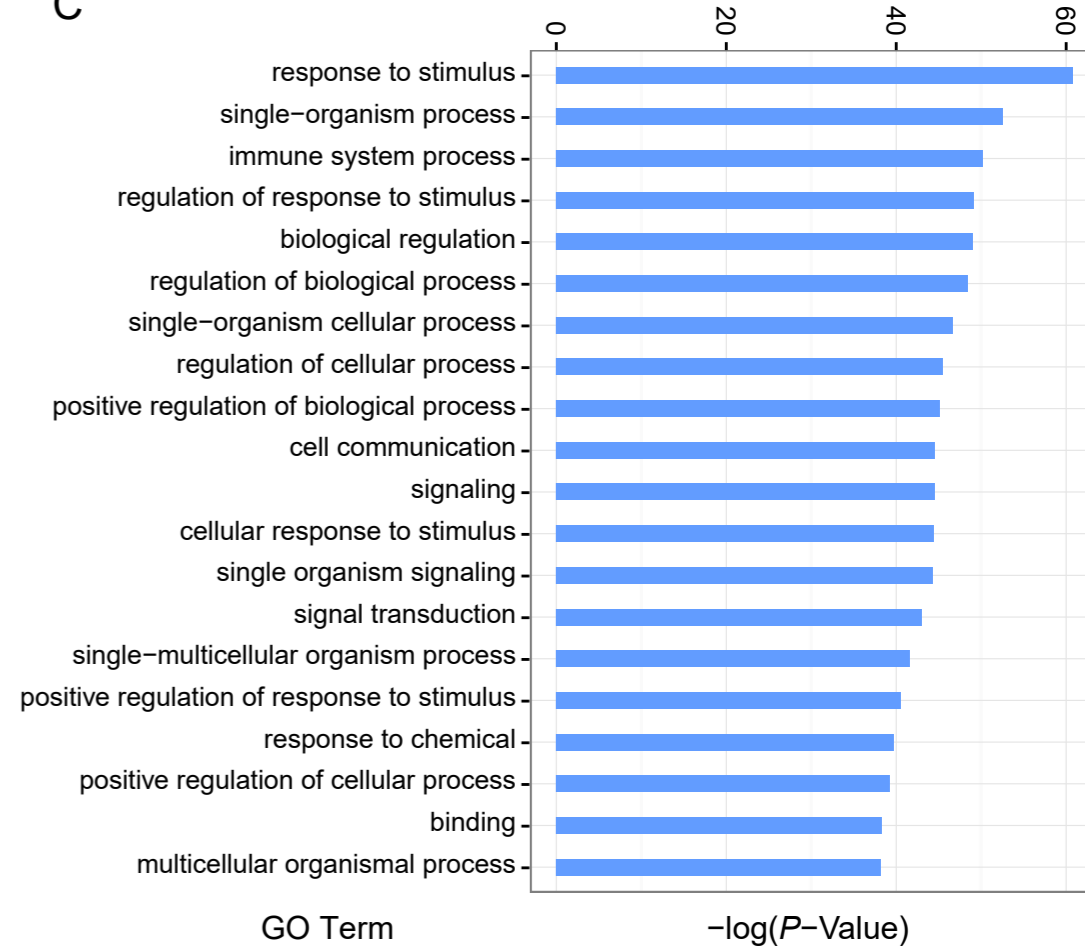

Supplement: MOESM5 [file 15867520]
