# Supplementary material for: Landscape of transcription and long non-coding RNAs reveals new insights into the inflammatory and fibrotic response following ventilator-induced lung injury
Source: Respir Res. 2018 Jun 22;19:122. doi: 10.1186/s12931-018-0822-z (PMC6013938; doi:10.1186/s12931-018-0822-z)
Supplement: Supplementary file 2 — Table S1. The entire list of differentially expressed transcripts (DETs) in the pairwise comparisons among the sham and VILI groups on day 0 and day 7. (XLSX 266 kb) [file 12931_2018_822_MOESM2_ESM.xlsx]

## Sheet: 0d Vs Sham
Identification of differentially expressed transcripts (DETs) in the comparison between sham and VILI group on day 0
Transcript ID	Gene ID	Gene symbol	Gene location	VILI day 0 FPKM	Ctrl FPKM	Log2 (Fold Change)	p-value	q-value
ENSMUST00000029632	ENSMUSG00000028003	Lrat	chr3:82892578-82903973	5.98586	40.6609	-2.76401	5e-05	0.00413767
ENSMUST00000005255	ENSMUSG00000005124	Wisp1	chr15:66891319-66923201	0.993007	6.11252	-2.62189	5e-05	0.00413767
ENSMUST00000029919	ENSMUSG00000028255	Clca1	chr3:145003816-145032776	1.67488	8.07666	-2.2697	5e-05	0.00413767
ENSMUST00000216226	ENSMUSG00000043383	Olfr1342	chr4:118687485-118692756	0.251528	1.2095	-2.26562	0.0001	0.00752154
ENSMUST00000037547	ENSMUSG00000040035	Disp2	chr2:118779718-118811293	1.64644	7.83445	-2.25048	5e-05	0.00413767
ENSMUST00000053949	ENSMUSG00000044461	Shisa2	chr14:59625280-59631658	0.867351	4.10267	-2.24187	5e-05	0.00413767
ENSMUST00000066742	ENSMUSG00000053980	Gm9930	chr10:9532530-9535681	0.205279	0.945659	-2.20373	5e-05	0.00413767
ENSMUST00000050780	ENSMUSG00000051262	Nat8f3	chr6:85760648-85765744	0.766695	3.07255	-2.00271	0.0001	0.00752154
ENSMUST00000210477	ENSMUSG00000035456	Prdm8	chr5:98167197-98188991	0.722737	2.80151	-1.95466	5e-05	0.00413767
ENSMUST00000029188	ENSMUSG00000027656	Wisp2	chr2:163820888-163833146	7.27489	28.0946	-1.94929	5e-05	0.00413767
ENSMUST00000068307	ENSMUSG00000054978	Kbtbd13	chr9:65388683-65391652	0.263722	0.998495	-1.92074	0.00015	0.0105044
ENSMUST00000062562	ENSMUSG00000044309	Apol7c	chr15:77524866-77533315	0.348675	1.30379	-1.90276	0.0006	0.0322352
ENSMUST00000046383	ENSMUSG00000039304	Tnfsf10	chr3:27317027-27342427	16.7801	58.8183	-1.80952	5e-05	0.00413767
ENSMUST00000079063	ENSMUSG00000063632	Sox11	chr12:27334263-27342574	3.89623	12.8346	-1.71989	5e-05	0.00413767
ENSMUST00000172699	ENSMUSG00000074480	Mex3a	chr3:88532394-88541396	0.225455	0.720198	-1.67555	0.00015	0.0105044
ENSMUST00000073935	ENSMUSG00000046182	Gsg1l	chr7:125878419-126082411	0.540439	1.62226	-1.5858	0.0003	0.0186561
ENSMUST00000067230	ENSMUSG00000076431	Sox4	chr13:28948918-28953713	12.8545	37.6841	-1.55168	5e-05	0.00413767
ENSMUST00000105993	ENSMUSG00000078532	Nkain1	chr4:130531617-130574173	1.49291	4.36683	-1.54846	0.00085	0.0421601
ENSMUST00000072600	ENSMUSG00000057123	Gja5	chr3:96798762-97077416	5.94338	17.2122	-1.53407	0.0001	0.00752154
ENSMUST00000044602	ENSMUSG00000057074	Ces1g	chr8:93302368-93337308	2.30451	6.67374	-1.53403	5e-05	0.00413767
ENSMUST00000171533	ENSMUSG00000042834	Nrep	chr18:33437018-33464029	18.3156	52.3576	-1.51533	5e-05	0.00413767
ENSMUST00000105590	ENSMUSG00000019768	Esr1	chr10:4611988-5005614	0.529805	1.49512	-1.49673	0.0004	0.0235705
ENSMUST00000043011	ENSMUSG00000038233	Fam198a	chr9:121950987-121980209	1.18717	3.31375	-1.48094	0.0005	0.0280447
ENSMUST00000100070	ENSMUSG00000060487	Samd5	chr10:9627258-9675208	3.65517	9.54507	-1.38482	5e-05	0.00413767
ENSMUST00000055619	ENSMUSG00000043099	Hic1	chr11:75164564-75169519	3.62325	9.23341	-1.34958	5e-05	0.00413767
ENSMUST00000063635	ENSMUSG00000029576	Radil	chr5:142484838-142551098	2.17132	5.38132	-1.30938	0.0006	0.0322352
ENSMUST00000036109	ENSMUSG00000037962	Rflna	chr5:125003220-125012547	2.16288	5.2915	-1.29072	0.00055	0.0301111
ENSMUST00000094666	ENSMUSG00000070720	Tmem200b	chr4:131921770-131923140	4.9044	11.9979	-1.29064	5e-05	0.00413767
ENSMUST00000005452	ENSMUSG00000005320	Fgfr4	chr13:55152639-55168759	3.38349	8.22165	-1.28091	5e-05	0.00413767
ENSMUST00000043884	ENSMUSG00000036295	Lrrn3	chr12:41024089-41955588	3.47319	8.30598	-1.25789	0.0001	0.00752154
ENSMUST00000072008	ENSMUSG00000057719	Sh3rf2	chr18:42053666-42158960	3.64407	8.68508	-1.25299	5e-05	0.00413767
ENSMUST00000174189	ENSMUSG00000047146	Tet1	chr10:62804569-62899118	1.21027	2.86829	-1.24486	5e-05	0.00413767
ENSMUST00000024857	ENSMUSG00000024063	Lbh	chr17:72918304-72941942	43.3719	102.772	-1.24462	5e-05	0.00413767
ENSMUST00000095360	ENSMUSG00000020053	Igf1	chr10:87858264-87937042	5.91477	13.9778	-1.24074	5e-05	0.00413767
ENSMUST00000199891	ENSMUSG00000066319	Rtp3	chr9:110984934-110990583	1.89491	4.46898	-1.23781	0.00075	0.0382387
ENSMUST00000178224	ENSMUSG00000094910	D430019H16Rik	chr12:105453855-105493095	1.91525	4.50191	-1.23301	5e-05	0.00413767
ENSMUST00000010941	ENSMUSG00000010797	Wnt2	chr6:17988939-18030585	3.37343	7.86868	-1.22191	0.00015	0.0105044
ENSMUST00000032157	ENSMUSG00000030074	Gxylt2	chr6:100704733-100810913	0.694578	1.61538	-1.21766	5e-05	0.00413767
ENSMUST00000032132	ENSMUSG00000068263	Efcc1	chr6:87729963-87755908	1.80083	4.18279	-1.2158	0.00105	0.0494336
ENSMUST00000066049	ENSMUSG00000049420	Tmem200a	chr10:25991185-26079447	1.45751	3.3391	-1.19595	0.0003	0.0186561
ENSMUST00000067853	ENSMUSG00000054675	Tmem119	chr5:113793728-113800516	8.64914	19.6633	-1.18488	5e-05	0.00413767
ENSMUST00000054351	ENSMUSG00000049001	Ndnf	chr6:65671589-65712326	25.4812	57.8045	-1.18175	5e-05	0.00413767
ENSMUST00000001854	ENSMUSG00000030495	Slc7a10	chr7:35186384-35215498	5.98495	13.5655	-1.18053	0.001	0.0477064
ENSMUST00000104937	ENSMUSG00000078137	Ankrd63	chr2:118699102-118703963	3.7155	8.3861	-1.17444	5e-05	0.00413767
ENSMUST00000035351	ENSMUSG00000041479	Syt15	chr14:34220045-34230421	1.77491	3.98811	-1.16796	0.0005	0.0280447
ENSMUST00000076249	ENSMUSG00000062488	Ifit3b	chr19:34607969-34613401	6.60953	14.8123	-1.16417	5e-05	0.00413767
ENSMUST00000082237	ENSMUSG00000057706	Mex3b	chr7:82867332-82871515	1.81691	4.04682	-1.1553	0.00065	0.0342624
ENSMUST00000061260	ENSMUSG00000046743	Fat4	chr3:38874569-39011985	4.48215	9.95186	-1.15077	5e-05	0.00413767
ENSMUST00000036300	ENSMUSG00000045672	Col27a1	chr4:63215434-63334991	2.52392	5.5267	-1.13075	5e-05	0.00413767
ENSMUST00000091137	ENSMUSG00000037016	Frem2	chr3:53513937-53657355	0.386761	0.837833	-1.11522	0.0008	0.0401414
ENSMUST00000028403	ENSMUSG00000027015	Cybrd1	chr2:71117922-71142926	3.23958	6.95728	-1.10272	5e-05	0.00413767
ENSMUST00000021970	ENSMUSG00000021508	Cxcl14	chr13:56288646-56296551	44.9455	95.4268	-1.08622	5e-05	0.00413767
ENSMUST00000066728	ENSMUSG00000053965	Pde5a	chr3:122728946-122859374	27.5497	58.4641	-1.08552	0.0005	0.0280447
ENSMUST00000032180	ENSMUSG00000030093	Wnt7a	chr6:91363980-91411363	1.70494	3.60605	-1.0807	0.00075	0.0382387
ENSMUST00000065496	ENSMUSG00000053199	Arhgap20	chr9:51765351-51853856	3.3688	6.99398	-1.05388	5e-05	0.00413767
ENSMUST00000026896	ENSMUSG00000025789	St8sia2	chr7:73939118-74013690	1.76636	3.63592	-1.04154	0.0003	0.0186561
ENSMUST00000020220	ENSMUSG00000020032	Nuak1	chr10:84370904-84440597	5.45092	11.1627	-1.03412	5e-05	0.00413767
ENSMUST00000009772	ENSMUSG00000009628	Tex15	chr8:33516737-33585582	2.29574	4.63914	-1.0149	0.00025	0.016035
ENSMUST00000041183	ENSMUSG00000036144	Meox2	chr12:37108539-37179534	6.11897	12.3634	-1.01471	0.0002	0.0133323
ENSMUST00000031278	ENSMUSG00000029335	Bmp3	chr5:98854414-98884396	11.0672	22.3504	-1.01401	5e-05	0.00413767
ENSMUST00000029845	ENSMUSG00000028194	Ddah1	chr3:145758674-145894277	4.15269	8.37529	-1.01209	0.00085	0.0421601
ENSMUST00000041577	ENSMUSG00000037922	Bank1	chr3:135928231-136326066	3.00617	6.05486	-1.01017	0.0004	0.0235705
ENSMUST00000042054	ENSMUSG00000038402	Foxf2	chr13:31625815-31631403	9.98025	20.0554	-1.00684	5e-05	0.00413767
ENSMUST00000000924	ENSMUSG00000000901	Mmp11	chr10:75923221-75932502	5.48665	11.016	-1.0056	0.0007	0.0362738
ENSMUST00000105082	ENSMUSG00000041757	Plekha6	chr1:133164209-133303435	4.09316	8.20433	-1.00317	0.0003	0.0186561
ENSMUST00000027243	ENSMUSG00000026073	Il1r2	chr1:40074078-40125231	19.1504	0.266784	6.16556	5e-05	0.00413767
ENSMUST00000065666	ENSMUSG00000022651	Retnlg	chr16:48872607-48874498	179.408	5.23256	5.09959	5e-05	0.00413767
ENSMUST00000018765	ENSMUSG00000005800	Mmp8	chr9:7558455-7568485	32.5367	1.07984	4.91317	5e-05	0.00413767
ENSMUST00000021209	ENSMUSG00000020848	Doc2b	chr11:75768965-75825241	7.16691	0.26635	4.74995	5e-05	0.00413767
ENSMUST00000079413	ENSMUSG00000024222	Fkbp5	chr17:28399094-28517524	74.6424	3.84048	4.28064	5e-05	0.00413767
ENSMUST00000069927	ENSMUSG00000056054	S100a8	chr3:90668977-90670035	437.862	24.6895	4.14851	5e-05	0.00413767
ENSMUST00000108653	ENSMUSG00000078817	Nlrp12	chr7:3218783-3249613	3.36101	0.206796	4.02261	5e-05	0.00413767
ENSMUST00000167596	ENSMUSG00000000204	Slfn4	chr11:83175185-83190216	3.24086	0.209812	3.94921	0.00105	0.0494336
ENSMUST00000069960	ENSMUSG00000056071	S100a9	chr3:90692631-90695721	630.244	40.8945	3.94593	5e-05	0.00413767
ENSMUST00000117167	ENSMUSG00000056071	S100a9	chr3:90692631-90695721	149.72	9.97498	3.90781	5e-05	0.00413767
ENSMUST00000101078	ENSMUSG00000079012	Serpina3m	chr12:104338485-104394257	4.41262	0.303391	3.86239	5e-05	0.00413767
ENSMUST00000032240	ENSMUSG00000030144	Clec4d	chr6:123262116-123275265	17.8009	1.27756	3.80049	5e-05	0.00413767
ENSMUST00000114792	ENSMUSG00000024222	Fkbp5	chr17:28399094-28517524	7.06559	0.508551	3.79635	0.0004	0.0235705
ENSMUST00000106899	ENSMUSG00000026180	Cxcr2	chr1:74153988-74161246	19.5729	1.4817	3.72353	5e-05	0.00413767
ENSMUST00000019721	ENSMUSG00000019577	Pdk4	chr6:5483350-5496309	28.0645	2.27077	3.62749	5e-05	0.00413767
ENSMUST00000121887	ENSMUSG00000021750	Fam107a	chr14:8296273-8318023	5.32247	0.477471	3.47861	0.00015	0.0105044
ENSMUST00000028881	ENSMUSG00000027398	Il1b	chr2:129364569-129375748	49.9016	4.49309	3.47331	5e-05	0.00413767
ENSMUST00000032239	ENSMUSG00000030142	Clec4e	chr6:123281788-123289870	7.42324	0.70905	3.38809	5e-05	0.00413767
ENSMUST00000075221	ENSMUSG00000058755	Osm	chr11:4236419-4241026	3.63819	0.372072	3.28957	5e-05	0.00413767
ENSMUST00000023829	ENSMUSG00000023067	Cdkn1a	chr17:29090978-29100722	163.006	16.966	3.2642	5e-05	0.00413767
ENSMUST00000068291	ENSMUSG00000067235	H2-Q10	chr17:35470088-35474563	6.39228	0.677028	3.23904	5e-05	0.00413767
ENSMUST00000079184	ENSMUSG00000059657	Stfa2l1	chr16:36156810-36161948	15.5273	1.66977	3.21708	5e-05	0.00413767
ENSMUST00000063690	ENSMUSG00000027068	Dhrs9	chr2:69380444-69404533	4.82425	0.519922	3.21394	5e-05	0.00413767
ENSMUST00000114858	ENSMUSG00000079597	Gm5483	chr16:36184211-36188111	11.9556	1.29591	3.20565	0.00025	0.016035
ENSMUST00000036070	ENSMUSG00000021750	Fam107a	chr14:8296273-8318023	22.9026	2.5074	3.19125	5e-05	0.00413767
ENSMUST00000002360	ENSMUSG00000002289	Angptl4	chr17:33773749-33781575	46.5539	5.14249	3.17836	5e-05	0.00413767
ENSMUST00000093852	ENSMUSG00000066687	Zbtb16	chr9:48654296-48836222	110.648	12.2887	3.17057	5e-05	0.00413767
ENSMUST00000043400	ENSMUSG00000033508	Asprv1	chr6:86628163-86629710	5.31219	0.601301	3.14315	5e-05	0.00413767
ENSMUST00000125733	ENSMUSG00000050671	Ism2	chr12:87278637-87299705	1.25502	0.149295	3.07148	0.00055	0.0301111
ENSMUST00000020308	ENSMUSG00000020108	Ddit4	chr10:59949674-59951770	53.7238	6.73206	2.99644	5e-05	0.00413767
ENSMUST00000048782	ENSMUSG00000042265	Trem1	chr17:48232767-48246924	5.23578	0.712002	2.87845	5e-05	0.00413767
ENSMUST00000108492	ENSMUSG00000004328	Hif3a	chr7:17031506-17062427	5.45776	0.747589	2.86799	5e-05	0.00413767
ENSMUST00000048121	ENSMUSG00000041794	Myrip	chr9:120301512-120474841	24.217	3.35244	2.85274	5e-05	0.00413767
ENSMUST00000030673	ENSMUSG00000028859	Csf3r	chr4:126024549-126044440	32.2527	4.5316	2.83133	5e-05	0.00413767
ENSMUST00000087328	ENSMUSG00000091971	Hspa1a	chr17:34969189-34972156	13.0163	1.84678	2.81723	5e-05	0.00413767
ENSMUST00000030677	ENSMUSG00000028862	Map3k6	chr4:133240817-133252929	27.4255	3.90789	2.81106	5e-05	0.00413767
ENSMUST00000000208	ENSMUSG00000000204	Slfn4	chr11:83175185-83190216	9.38043	1.37622	2.76894	5e-05	0.00413767
ENSMUST00000017881	ENSMUSG00000017737	Mmp9	chr2:164940779-164955850	16.1655	2.4588	2.71689	5e-05	0.00413767
ENSMUST00000105401	ENSMUSG00000009292	Trpm2	chr10:77907721-77969854	2.85711	0.438623	2.7035	5e-05	0.00413767
ENSMUST00000051676	ENSMUSG00000046694	Fam46b	chr4:133479355-133487938	18.4071	2.98035	2.62671	5e-05	0.00413767
ENSMUST00000216150	ENSMUSG00000066687	Zbtb16	chr9:48654296-48836222	50.4649	8.27051	2.60923	5e-05	0.00413767
ENSMUST00000030811	ENSMUSG00000028967	Errfi1	chr4:150853918-150868892	203.705	34.0041	2.5827	5e-05	0.00413767
ENSMUST00000035061	ENSMUSG00000032484	Ngp	chr9:110419746-110423012	5.95955	0.998964	2.5767	5e-05	0.00413767
ENSMUST00000026911	ENSMUSG00000025804	Ccr1	chr9:123962123-123968692	17.1217	2.87497	2.5742	5e-05	0.00413767
ENSMUST00000205503	ENSMUSG00000004609	Cd33	chr7:43524215-43544428	22.0815	3.73851	2.5623	5e-05	0.00413767
ENSMUST00000061628	ENSMUSG00000050505	Pcdh20	chr14:88464742-88471396	1.10259	0.18841	2.54895	5e-05	0.00413767
ENSMUST00000172753	ENSMUSG00000090877	Hspa1b	chr17:34956435-34959238	14.7818	2.60107	2.50665	5e-05	0.00413767
ENSMUST00000032174	ENSMUSG00000030087	Klf15	chr6:90462575-90475238	52.2844	9.28096	2.49404	5e-05	0.00413767
ENSMUST00000034214	ENSMUSG00000031762	Mt2	chr8:94172663-94173568	168.5	29.948	2.49221	5e-05	0.00413767
ENSMUST00000005976	ENSMUSG00000005824	Tnfsf14	chr17:57189491-57194189	4.09406	0.740269	2.46741	5e-05	0.00413767
ENSMUST00000020710	ENSMUSG00000020432	Tcn2	chr11:3917191-3932159	43.0846	7.80007	2.46561	0.0001	0.00752154
ENSMUST00000096232	ENSMUSG00000071637	Cebpd	chr16:15887285-16146851	63.989	11.6808	2.45368	5e-05	0.00413767
ENSMUST00000059091	ENSMUSG00000056025	Clca3a1	chr3:144729915-144760841	4.03155	0.740314	2.44512	5e-05	0.00413767
ENSMUST00000006818	ENSMUSG00000006642	Tcf23	chr5:30968661-30977018	2.4104	0.44621	2.43347	5e-05	0.00413767
ENSMUST00000109820	ENSMUSG00000007659	Bcl2l1	chr2:152780667-152831728	92.6433	17.7169	2.38656	5e-05	0.00413767
ENSMUST00000071065	ENSMUSG00000056749	Nfil3	chr13:52967208-52981073	13.3264	2.68333	2.31219	5e-05	0.00413767
ENSMUST00000022595	ENSMUSG00000022018	Rgcc	chr14:79288755-79301645	279.642	56.5609	2.30571	5e-05	0.00413767
ENSMUST00000022460	ENSMUSG00000021903	Galnt15	chr14:32028988-32062197	20.3736	4.16484	2.29037	5e-05	0.00413767
ENSMUST00000025025	ENSMUSG00000024190	Dusp1	chr17:26505589-26508519	253.911	53.6866	2.24169	5e-05	0.00413767
ENSMUST00000063278	ENSMUSG00000031980	Agt	chr8:124556533-124569706	1.14081	0.244363	2.22296	0.00035	0.0211828
ENSMUST00000057567	ENSMUSG00000044103	Il1f9	chr2:24186475-24193568	8.45172	1.83129	2.20639	5e-05	0.00413767
ENSMUST00000032667	ENSMUSG00000030474	Siglece	chr7:43651069-43660161	7.94343	1.7619	2.17263	5e-05	0.00413767
ENSMUST00000200863	ENSMUSG00000056602	Fry	chr5:150118644-150497753	21.3389	4.83469	2.14199	0.00075	0.0382387
ENSMUST00000111067	ENSMUSG00000020593	Lpin1	chr12:16535668-16589770	13.8251	3.15958	2.12949	5e-05	0.00413767
ENSMUST00000106561	ENSMUSG00000047798	Cd300lf	chr11:115091430-115162236	8.74791	2.02443	2.11142	5e-05	0.00413767
ENSMUST00000021271	ENSMUSG00000020893	Per1	chr11:69095216-69109960	45.6583	10.6691	2.09744	5e-05	0.00413767
ENSMUST00000147399	ENSMUSG00000086564	Cd101	chr3:100993528-101029556	3.33361	0.779122	2.09716	0.00035	0.0211828
ENSMUST00000167323	ENSMUSG00000090698	Apold1	chr6:134981717-134986836	4.88658	1.14674	2.09129	5e-05	0.00413767
ENSMUST00000023101	ENSMUSG00000022464	Slc38a4	chr15:96994822-97055956	16.5234	3.91105	2.07888	5e-05	0.00413767
ENSMUST00000042818	ENSMUSG00000035828	Pim3	chr15:88862185-88865718	55.9597	13.3699	2.0654	5e-05	0.00413767
ENSMUST00000032500	ENSMUSG00000030350	Prmt8	chr6:127689010-127769472	11.2926	2.74295	2.04158	5e-05	0.00413767
ENSMUST00000062405	ENSMUSG00000049892	Rasd1	chr11:59963180-59964944	7.25593	1.77198	2.0338	5e-05	0.00413767
ENSMUST00000021685	ENSMUSG00000021260	Hhipl1	chr12:108306269-108328300	0.953392	0.235808	2.01546	0.0005	0.0280447
ENSMUST00000106373	ENSMUSG00000030711	Sult1a1	chr7:126649308-126676432	97.5303	24.4812	1.99418	5e-05	0.00413767
ENSMUST00000164410	ENSMUSG00000052749	Trim30b	chr7:104355397-104369866	3.21964	0.818792	1.97533	0.0009	0.0440307
ENSMUST00000043059	ENSMUSG00000038264	Sema7a	chr9:57940112-57962865	70.2565	18.1214	1.95494	5e-05	0.00413767
ENSMUST00000025409	ENSMUSG00000024529	Lox	chr18:52516068-52529867	26.8233	7.03789	1.93027	5e-05	0.00413767
ENSMUST00000039388	ENSMUSG00000034936	Arl4d	chr11:101665540-101667832	70.2921	18.5011	1.92575	5e-05	0.00413767
ENSMUST00000085050	ENSMUSG00000066361	Serpina3c	chr12:104146381-104153870	9.95041	2.63832	1.91513	5e-05	0.00413767
ENSMUST00000081134	ENSMUSG00000060445	Sycp2	chr2:178345292-178407685	0.580612	0.154143	1.9133	0.00025	0.016035
ENSMUST00000025046	ENSMUSG00000024210	Ip6k3	chr17:27143968-27167764	2.62843	0.710717	1.88686	0.0001	0.00752154
ENSMUST00000171470	ENSMUSG00000024529	Lox	chr18:52516068-52529867	37.1304	10.066	1.88311	5e-05	0.00413767
ENSMUST00000074465	ENSMUSG00000032204	Aqp9	chr9:71110658-71168657	1.41335	0.384696	1.87733	0.00015	0.0105044
ENSMUST00000021903	ENSMUSG00000021453	Gadd45g	chr13:51846677-51848468	38.9118	10.611	1.87465	5e-05	0.00413767
ENSMUST00000102894	ENSMUSG00000062593	Lilrb4a	chr10:51480678-51486219	11.1409	3.07795	1.85583	5e-05	0.00413767
ENSMUST00000024706	ENSMUSG00000023913	Pla2g7	chr17:43568097-43612201	16.5483	4.62333	1.83968	5e-05	0.00413767
ENSMUST00000063446	ENSMUSG00000061878	Sphk1	chr11:116529214-116536674	6.31099	1.77002	1.8341	5e-05	0.00413767
ENSMUST00000031263	ENSMUSG00000029321	Slc10a6	chr5:103605710-103629403	20.5159	5.75406	1.83409	5e-05	0.00413767
ENSMUST00000054801	ENSMUSG00000046828	Mettl21e	chr1:44204069-44218961	5.46396	1.54063	1.82643	5e-05	0.00413767
ENSMUST00000189061	ENSMUSG00000026358	Rgs1	chr1:144242295-144249242	1.45961	0.41279	1.8221	0.0001	0.00752154
ENSMUST00000167545	ENSMUSG00000001227	Sema6b	chr17:56123084-56140343	7.02058	1.99027	1.81862	5e-05	0.00413767
ENSMUST00000106831	ENSMUSG00000052749	Trim30b	chr7:104355397-104369866	2.74926	0.781047	1.81556	0.0001	0.00752154
ENSMUST00000001184	ENSMUSG00000001156	Mxd1	chr6:86647041-86669161	31.1026	8.86751	1.81043	5e-05	0.00413767
ENSMUST00000086199	ENSMUSG00000026473	Glul	chr1:153849541-153909723	348.915	99.7239	1.80687	5e-05	0.00413767
ENSMUST00000041438	ENSMUSG00000038332	Sesn1	chr10:41809934-41908424	44.5471	12.7384	1.80614	5e-05	0.00413767
ENSMUST00000087600	ENSMUSG00000058624	Gda	chr19:21391306-21473445	24.8333	7.14378	1.79752	5e-05	0.00413767
ENSMUST00000057145	ENSMUSG00000045502	Hcar2	chr5:123863569-123865499	6.5693	1.89209	1.79576	5e-05	0.00413767
ENSMUST00000038661	ENSMUSG00000040740	Slc25a34	chr4:141618823-141623821	1.50996	0.436431	1.79069	0.00055	0.0301111
ENSMUST00000032476	ENSMUSG00000003153	Slc2a3	chr6:122727808-122801640	8.90105	2.58438	1.78416	5e-05	0.00413767
ENSMUST00000007803	ENSMUSG00000007659	Bcl2l1	chr2:152780667-152831728	31.0315	9.02883	1.78112	0.00085	0.0421601
ENSMUST00000048065	ENSMUSG00000041754	Trem3	chr17:48247776-48258841	3.52413	1.02712	1.77866	0.00055	0.0301111
ENSMUST00000025691	ENSMUSG00000024778	Fas	chr19:34290658-34327770	72.4799	21.3509	1.76328	5e-05	0.00413767
ENSMUST00000049614	ENSMUSG00000043740	B430306N03Rik	chr17:48316140-48327024	2.24997	0.663372	1.76201	5e-05	0.00413767
ENSMUST00000096350	ENSMUSG00000042622	Maff	chr15:79347540-79359072	14.6995	4.3569	1.75439	5e-05	0.00413767
ENSMUST00000002989	ENSMUSG00000002910	Arrdc2	chr8:70835128-70839720	15.2975	4.58163	1.73936	5e-05	0.00413767
ENSMUST00000034215	ENSMUSG00000031765	Mt1	chr8:94179081-94180327	210.204	63.2528	1.73259	5e-05	0.00413767
ENSMUST00000047321	ENSMUSG00000055116	Arntl	chr7:113207464-113314126	9.73218	2.93172	1.73101	5e-05	0.00413767
ENSMUST00000022287	ENSMUSG00000021765	Fst	chr13:114452261-114458730	3.65289	1.10737	1.7219	5e-05	0.00413767
ENSMUST00000020958	ENSMUSG00000020627	Klhl29	chr12:5077471-5375682	5.18487	1.59627	1.69961	5e-05	0.00413767
ENSMUST00000188995	ENSMUSG00000101389	Ms4a4a	chr19:11375522-11392790	8.11502	2.51956	1.68743	0.0003	0.0186561
ENSMUST00000078825	ENSMUSG00000059089	Fcgr4	chr1:171018919-171029761	9.33623	2.92294	1.67542	5e-05	0.00413767
ENSMUST00000055738	ENSMUSG00000031431	Tsc22d3	chrX:140539527-140600659	303.697	95.783	1.66479	5e-05	0.00413767
ENSMUST00000092627	ENSMUSG00000004360	9330159F19Rik	chr10:29211605-29230779	2.52948	0.799126	1.66235	0.0002	0.0133323
ENSMUST00000026381	ENSMUSG00000025330	Padi4	chr4:140745864-140774236	2.9007	0.917233	1.66104	5e-05	0.00413767
ENSMUST00000090746	ENSMUSG00000027875	Hmgcs2	chr3:98280434-98310738	13.4725	4.27009	1.65768	5e-05	0.00413767
ENSMUST00000070832	ENSMUSG00000051748	Wfdc21	chr11:83746939-83752642	26.9735	8.59995	1.64915	0.00015	0.0105044
ENSMUST00000101004	ENSMUSG00000020893	Per1	chr11:69095216-69109960	17.9982	5.75238	1.64562	0.00095	0.0458858
ENSMUST00000051241	ENSMUSG00000044786	Zfp36	chr7:28376783-28392708	44.717	14.3434	1.64044	5e-05	0.00413767
ENSMUST00000025399	ENSMUSG00000024521	Pmaip1	chr18:66458603-66465550	16.7731	5.43582	1.62558	5e-05	0.00413767
ENSMUST00000065112	ENSMUSG00000033453	Adamts15	chr9:30899154-30922452	38.1792	12.4471	1.61698	5e-05	0.00413767
ENSMUST00000046520	ENSMUSG00000038074	Fkbp14	chr6:54577603-54645839	17.2665	5.67086	1.60633	5e-05	0.00413767
ENSMUST00000098927	ENSMUSG00000031442	Mcf2l	chr8:12873805-13020905	22.457	7.39587	1.60237	0.00035	0.0211828
ENSMUST00000080418	ENSMUSG00000024589	Nedd4l	chr18:64887755-65217826	12.4146	4.10915	1.59512	0.00025	0.016035
ENSMUST00000029865	ENSMUSG00000028211	Trp53inp1	chr4:11156430-11174379	105.899	35.0979	1.59323	5e-05	0.00413767
ENSMUST00000054002	ENSMUSG00000053113	Socs3	chr11:117966078-117969186	36.9921	12.2904	1.58968	5e-05	0.00413767
ENSMUST00000037994	ENSMUSG00000078763	Slfn1	chr11:83116848-83122670	13.0004	4.33921	1.58305	5e-05	0.00413767
ENSMUST00000031017	ENSMUSG00000029135	Fosl2	chr5:32135800-32157842	40.7645	13.6431	1.57914	5e-05	0.00413767
ENSMUST00000097891	ENSMUSG00000073758	Sh3d21	chr4:126150601-126163491	6.57363	2.20583	1.57537	0.00085	0.0421601
ENSMUST00000067354	ENSMUSG00000048489	8430408G22Rik	chr6:116633007-116673952	59.0237	19.8418	1.57275	0.00055	0.0301111
ENSMUST00000035077	ENSMUSG00000032496	Ltf	chr9:111019270-111042767	17.7132	5.97338	1.56821	5e-05	0.00413767
ENSMUST00000064151	ENSMUSG00000025509	Pnpla2	chr7:141455197-141460743	31.103	10.5236	1.56343	0.0005	0.0280447
ENSMUST00000038562	ENSMUSG00000039911	Spsb1	chr4:149896282-149955043	16.6169	5.64268	1.5582	5e-05	0.00413767
ENSMUST00000033054	ENSMUSG00000030790	Adm	chr7:110627660-110629820	10.2542	3.49354	1.55346	5e-05	0.00413767
ENSMUST00000070639	ENSMUSG00000074417	Gm14548	chr7:3884241-3898120	2.35477	0.80613	1.5465	0.00025	0.016035
ENSMUST00000168092	ENSMUSG00000089809	A930011G23Rik	chr5:99217425-99729062	18.1758	6.31832	1.52441	5e-05	0.00413767
ENSMUST00000056815	ENSMUSG00000026077	Npas2	chr1:39193730-39363236	3.62155	1.26536	1.51706	5e-05	0.00413767
ENSMUST00000029564	ENSMUSG00000027952	Pmvk	chr3:89454540-89469013	45.7983	16.0829	1.50977	5e-05	0.00413767
ENSMUST00000114294	ENSMUSG00000029802	Abcg2	chr6:58584522-58695676	27.1711	9.57247	1.50511	5e-05	0.00413767
ENSMUST00000115032	ENSMUSG00000037447	Arid5a	chr1:36307732-36324029	5.23517	1.85229	1.49892	0.0002	0.0133323
ENSMUST00000040065	ENSMUSG00000033777	Tlr13	chrX:106143228-106160493	10.2072	3.6123	1.4986	5e-05	0.00413767
ENSMUST00000032234	ENSMUSG00000008845	Cd163	chr6:124304655-124330527	4.34925	1.53975	1.49807	5e-05	0.00413767
ENSMUST00000021413	ENSMUSG00000021025	Nfkbia	chr12:55489410-55492647	142.662	50.9543	1.48532	5e-05	0.00413767
ENSMUST00000027941	ENSMUSG00000026628	Atf3	chr1:191170295-191218039	7.50166	2.68776	1.4808	5e-05	0.00413767
ENSMUST00000078694	ENSMUSG00000061718	Ppp1r1b	chr11:98348403-98358283	7.80364	2.83169	1.46248	5e-05	0.00413767
ENSMUST00000114482	ENSMUSG00000026981	Il1rn	chr2:24336852-24351494	7.9791	2.90509	1.45764	5e-05	0.00413767
ENSMUST00000064922	ENSMUSG00000052837	Junb	chr8:84976909-84978718	75.6794	27.6194	1.45422	5e-05	0.00413767
ENSMUST00000032501	ENSMUSG00000030351	Tspan11	chr6:127887588-127953977	24.306	8.87737	1.45311	5e-05	0.00413767
ENSMUST00000036884	ENSMUSG00000033863	Klf9	chr19:23141225-23166911	112.802	41.2206	1.45236	5e-05	0.00413767
ENSMUST00000044195	ENSMUSG00000042246	Tmc7	chr7:118535840-118584736	2.05955	0.753913	1.44986	5e-05	0.00413767
ENSMUST00000024866	ENSMUSG00000024066	Xdh	chr17:73883907-73950182	152.887	56.0634	1.44733	5e-05	0.00413767
ENSMUST00000030408	ENSMUSG00000028655	Mfsd2a	chr4:122946849-122961188	3.57281	1.31281	1.4444	0.0002	0.0133323
ENSMUST00000021506	ENSMUSG00000021091	Serpina3n	chr12:104406728-104414329	54.267	20.0558	1.43605	5e-05	0.00413767
ENSMUST00000164016	ENSMUSG00000025509	Pnpla2	chr7:141455197-141460743	56.6261	20.9605	1.4338	5e-05	0.00413767
ENSMUST00000029297	ENSMUSG00000027737	Slc7a11	chr3:49892525-50443614	1.91222	0.708097	1.43323	5e-05	0.00413767
ENSMUST00000075072	ENSMUSG00000021886	Gpr65	chr12:98268634-98276624	6.44046	2.39309	1.42829	5e-05	0.00413767
ENSMUST00000025636	ENSMUSG00000024730	Ms4a8a	chr19:11067470-11081102	10.1251	3.77452	1.42357	5e-05	0.00413767
ENSMUST00000023779	ENSMUSG00000023034	Nr4a1	chr15:101266845-101274792	29.3586	10.9536	1.42238	5e-05	0.00413767
ENSMUST00000029433	ENSMUSG00000027843	Ptpn22	chr3:103860276-103912247	8.36811	3.13298	1.41737	5e-05	0.00413767
ENSMUST00000041357	ENSMUSG00000037095	Lrg1	chr17:56119679-56121946	56.5849	21.3894	1.40352	5e-05	0.00413767
ENSMUST00000126534	ENSMUSG00000033685	Ucp2	chr7:100493336-100514960	125.398	47.6689	1.39539	5e-05	0.00413767
ENSMUST00000029017	ENSMUSG00000027513	Pck1	chr2:173153047-173159273	3.58401	1.36322	1.39456	0.00015	0.0105044
ENSMUST00000005829	ENSMUSG00000005686	Ampd3	chr7:110768205-110812405	16.4506	6.29559	1.38573	5e-05	0.00413767
ENSMUST00000105999	ENSMUSG00000028776	Tinagl1	chr4:130165601-130175122	82.113	31.4522	1.38445	5e-05	0.00413767
ENSMUST00000168120	ENSMUSG00000072949	Acot1	chr12:84009501-84017670	29.2932	11.2414	1.38175	5e-05	0.00413767
ENSMUST00000041768	ENSMUSG00000033715	Akr1c14	chr13:4049010-4090422	75.3293	29.3717	1.35879	5e-05	0.00413767
ENSMUST00000093942	ENSMUSG00000070337	Gpr179	chr11:97332108-97352016	0.938362	0.365901	1.35869	0.0003	0.0186561
ENSMUST00000031276	ENSMUSG00000089809	A930011G23Rik	chr5:99217425-99729062	18.0001	7.03872	1.35462	0.0001	0.00752154
ENSMUST00000106112	ENSMUSG00000078566	Bnip3	chr7:138890835-138909506	45.7361	17.9141	1.35224	5e-05	0.00413767
ENSMUST00000020692	ENSMUSG00000020423	Btg2	chr1:134075169-134079120	136.92	54.0292	1.34152	5e-05	0.00413767
ENSMUST00000171629	ENSMUSG00000045094	Arhgef37	chr18:61493793-61536536	2.17642	0.861288	1.33739	0.0003	0.0186561
ENSMUST00000019266	ENSMUSG00000019122	Ccl9	chr11:83572918-83578636	7.98511	3.16377	1.33567	5e-05	0.00413767
ENSMUST00000031243	ENSMUSG00000029304	Spp1	chr5:104435117-104441050	72.2311	28.6682	1.33317	5e-05	0.00413767
ENSMUST00000053175	ENSMUSG00000050666	Vstm4	chr14:32856755-32939487	13.678	5.45214	1.32697	0.00015	0.0105044
ENSMUST00000021674	ENSMUSG00000021250	Fos	chr12:85473889-85477273	42.7194	17.1038	1.32057	5e-05	0.00413767
ENSMUST00000045075	ENSMUSG00000034641	Cd300ld	chr11:114982273-114989922	6.70929	2.68951	1.31882	0.0001	0.00752154
ENSMUST00000046765	ENSMUSG00000033998	Kcnk1	chr8:125995169-126030685	10.2794	4.13681	1.31316	5e-05	0.00413767
ENSMUST00000028985	ENSMUSG00000027483	Bpifa1	chr2:154142879-154149219	365.737	147.678	1.30835	5e-05	0.00413767
ENSMUST00000015712	ENSMUSG00000015568	Lpl	chr8:68880490-68906934	94.8826	38.355	1.30673	5e-05	0.00413767
ENSMUST00000000642	ENSMUSG00000000628	Hk2	chr6:82725024-82774454	10.7267	4.34043	1.3053	5e-05	0.00413767
ENSMUST00000057262	ENSMUSG00000047330	Kcne4	chr1:78816757-78820028	7.22105	2.92407	1.30423	5e-05	0.00413767
ENSMUST00000053640	ENSMUSG00000045730	Adrb2	chr18:62177816-62179959	99.2791	40.2992	1.30074	5e-05	0.00413767
ENSMUST00000105502	ENSMUSG00000048756	Foxo3	chr10:42181840-42276755	63.0435	25.609	1.2997	5e-05	0.00413767
ENSMUST00000050020	ENSMUSG00000048534	Amica1	chr9:45079182-45135606	5.19446	2.11297	1.2977	0.0005	0.0280447
ENSMUST00000192047	ENSMUSG00000026581	Sell	chr1:164061981-164084181	12.6069	5.13061	1.29701	5e-05	0.00413767
ENSMUST00000164044	ENSMUSG00000059498	Fcgr3	chr1:171051174-171064935	29.3214	11.9491	1.29505	5e-05	0.00413767
ENSMUST00000003981	ENSMUSG00000003882	Il7r	chr15:9506160-9529876	12.6141	5.15013	1.29235	5e-05	0.00413767
ENSMUST00000078778	ENSMUSG00000062593	Lilrb4a	chr10:51491017-51496613	26.1435	10.6851	1.29085	5e-05	0.00413767
ENSMUST00000026546	ENSMUSG00000025473	Adam8	chr7:139950439-139992562	8.96619	3.69095	1.2805	5e-05	0.00413767
ENSMUST00000003574	ENSMUSG00000003484	Cyp4f18	chr8:71988481-72010906	11.0678	4.55901	1.27958	5e-05	0.00413767
ENSMUST00000071858	ENSMUSG00000071379	Hpcal1	chr12:17690813-17791926	89.0877	36.7429	1.27776	5e-05	0.00413767
ENSMUST00000094480	ENSMUSG00000001768	Rin2	chr2:145784733-145893903	43.1681	17.905	1.2696	0.0004	0.0235705
ENSMUST00000002284	ENSMUSG00000046223	Plaur	chr7:24462483-24475967	33.1277	13.7593	1.26763	5e-05	0.00413767
ENSMUST00000042610	ENSMUSG00000073490	Ifi207	chr1:173723429-173741809	7.77255	3.23493	1.26465	5e-05	0.00413767
ENSMUST00000100572	ENSMUSG00000022372	Sla	chr15:66670752-66850721	14.5252	6.05987	1.2612	0.00045	0.0259452
ENSMUST00000024839	ENSMUSG00000024042	Sik1	chr17:31844247-31855792	67.3792	28.194	1.25692	5e-05	0.00413767
ENSMUST00000067124	ENSMUSG00000020593	Lpin1	chr12:16535668-16589770	12.6115	5.28111	1.25583	0.0002	0.0133323
ENSMUST00000092836	ENSMUSG00000069792	Wfdc17	chr11:83703990-83706268	24.0632	10.112	1.25077	0.001	0.0477064
ENSMUST00000034017	ENSMUSG00000031605	Klhl2	chr8:64739674-64850017	24.2425	10.2152	1.24682	5e-05	0.00413767
ENSMUST00000032376	ENSMUSG00000057604	Lmcd1	chr6:112273757-112330425	26.5698	11.2457	1.24042	5e-05	0.00413767
ENSMUST00000151289	ENSMUSG00000040451	Sgms1	chr19:32122726-32388512	34.2269	14.5591	1.23321	0.00045	0.0259452
ENSMUST00000027237	ENSMUSG00000026068	Il18rap	chr1:40515361-40551705	5.95525	2.53458	1.23242	0.0001	0.00752154
ENSMUST00000209061	ENSMUSG00000044786	Zfp36	chr7:28376783-28392708	55.0854	23.5507	1.2259	0.00025	0.016035
ENSMUST00000078451	ENSMUSG00000058818	Pirb	chr7:3711408-3720382	12.6093	5.39217	1.22555	5e-05	0.00413767
ENSMUST00000028838	ENSMUSG00000027360	Hdc	chr2:126593666-126618678	31.3114	13.4126	1.2231	5e-05	0.00413767
ENSMUST00000054098	ENSMUSG00000044026	Slc35g1	chr19:38395979-38405607	3.50391	1.50716	1.21713	0.00025	0.016035
ENSMUST00000065408	ENSMUSG00000079018	Ly6c1	chr15:75044017-75048830	307.55	132.615	1.21358	5e-05	0.00413767
ENSMUST00000106242	ENSMUSG00000030786	Itgam	chr7:128062639-128128160	8.78575	3.82859	1.19835	0.0001	0.00752154
ENSMUST00000194632	ENSMUSG00000033684	Qsox1	chr1:155778157-155812889	50.2111	21.9584	1.19323	0.0002	0.0133323
ENSMUST00000050770	ENSMUSG00000049130	C5ar1	chr7:16246742-16259540	8.90612	3.91695	1.18506	0.0004	0.0235705
ENSMUST00000042561	ENSMUSG00000038178	Slc43a2	chr11:75531693-75577575	30.2723	13.3513	1.18102	5e-05	0.00413767
ENSMUST00000045560	ENSMUSG00000038496	Slc19a3	chr1:83012522-83038448	3.81308	1.68198	1.1808	0.0005	0.0280447
ENSMUST00000113242	ENSMUSG00000059013	Sh2d3c	chr2:32721054-32755512	25.93	11.4492	1.17937	0.0001	0.00752154
ENSMUST00000056950	ENSMUSG00000044456	Rin3	chr12:102283047-102390855	49.8365	22.1339	1.17094	5e-05	0.00413767
ENSMUST00000125209	ENSMUSG00000021596	Mctp1	chr13:76384534-77031810	9.72333	4.31911	1.17072	0.0002	0.0133323
ENSMUST00000020655	ENSMUSG00000020387	Jade2	chr11:51813454-51857653	21.1462	9.40779	1.16847	5e-05	0.00413767
ENSMUST00000024849	ENSMUSG00000024053	Emilin2	chr17:71252175-71310965	7.91683	3.52428	1.1676	5e-05	0.00413767
ENSMUST00000022787	ENSMUSG00000022180	Slc7a8	chr14:54722215-54781886	1.76738	0.789705	1.16222	0.0009	0.0440307
ENSMUST00000109428	ENSMUSG00000074607	Tox2	chr2:163203124-163324170	13.5841	6.09247	1.15681	5e-05	0.00413767
ENSMUST00000039380	ENSMUSG00000040055	Gjb6	chr14:57123302-57133611	5.80901	2.60549	1.15674	0.00025	0.016035
ENSMUST00000062024	ENSMUSG00000046275	Tusc5	chr11:76679807-76698664	9.75756	4.39543	1.15052	5e-05	0.00413767
ENSMUST00000032761	ENSMUSG00000030545	Pex11a	chr7:79735956-79743080	9.87616	4.46436	1.1455	0.00015	0.0105044
ENSMUST00000037491	ENSMUSG00000039109	F13a1	chr13:36867177-37050244	18.3816	8.36284	1.13619	5e-05	0.00413767
ENSMUST00000094451	ENSMUSG00000047875	Gpr157	chr4:150087364-150105927	4.4481	2.02949	1.13208	0.0001	0.00752154
ENSMUST00000035010	ENSMUSG00000032437	Stt3b	chr9:115242580-115310421	99.4531	45.4877	1.12854	5e-05	0.00413767
ENSMUST00000096355	ENSMUSG00000071713	Csf2rb	chr15:78325989-78351000	16.1177	7.40013	1.12302	5e-05	0.00413767
ENSMUST00000071130	ENSMUSG00000060063	Alox5ap	chr5:149264766-149288153	34.7451	15.9883	1.1198	5e-05	0.00413767
ENSMUST00000027754	ENSMUSG00000026480	Ncf2	chr1:152800193-152836991	16.7245	7.70331	1.11841	5e-05	0.00413767
ENSMUST00000027863	ENSMUSG00000026576	Atp1b1	chr1:164307671-164458355	240.918	111.147	1.11607	5e-05	0.00413767
ENSMUST00000014957	ENSMUSG00000014813	Stc1	chr14:69029288-69041401	7.09391	3.27756	1.11396	5e-05	0.00413767
ENSMUST00000100874	ENSMUSG00000048163	Selplg	chr5:113818535-113832644	34.2898	15.8726	1.11124	5e-05	0.00413767
ENSMUST00000044833	ENSMUSG00000032661	Oas3	chr5:120753097-120777661	2.59167	1.20098	1.10967	0.00035	0.0211828
ENSMUST00000030724	ENSMUSG00000028893	Sesn2	chr4:132492031-132510501	11.1746	5.20104	1.10335	5e-05	0.00413767
ENSMUST00000024797	ENSMUSG00000064120	Mocs1	chr17:49427937-49455435	16.4486	7.666	1.10142	0.0004	0.0235705
ENSMUST00000036540	ENSMUSG00000041040	Fam117b	chr1:59913005-59985346	47.1509	22.0453	1.09681	5e-05	0.00413767
ENSMUST00000014118	ENSMUSG00000013974	Mcemp1	chr8:3665753-3669259	15.9141	7.45121	1.09476	0.0002	0.0133323
ENSMUST00000070642	ENSMUSG00000056501	Cebpb	chr2:167688914-167690418	101.113	47.6289	1.08606	5e-05	0.00413767
ENSMUST00000080882	ENSMUSG00000040907	Atp1a3	chr7:24978166-25005958	4.9148	2.31676	1.08503	0.0004	0.0235705
ENSMUST00000055676	ENSMUSG00000045092	S1pr1	chr3:115710432-115715072	162.634	77.0393	1.07797	5e-05	0.00413767
ENSMUST00000107756	ENSMUSG00000028337	Coro2a	chr4:46536936-46602202	10.0584	4.76578	1.07762	5e-05	0.00413767
ENSMUST00000017851	ENSMUSG00000017707	Serinc3	chr2:163623271-163645131	496.035	236.084	1.07114	0.00025	0.016035
ENSMUST00000172278	ENSMUSG00000045613	Chrm2	chr6:36387378-36528414	12.7697	6.11887	1.06138	5e-05	0.00413767
ENSMUST00000052839	ENSMUSG00000031217	Efnb1	chrX:99136129-99148991	58.271	28.0813	1.05317	5e-05	0.00413767
ENSMUST00000163588	ENSMUSG00000033855	Ston1	chr17:88597683-88662586	42.5261	20.5018	1.0526	0.0001	0.00752154
ENSMUST00000114846	ENSMUSG00000026773	Pfkfb3	chr2:11471432-11554077	29.4773	14.2127	1.05243	5e-05	0.00413767
ENSMUST00000020145	ENSMUSG00000019970	Sgk1	chr10:21882183-21999903	76.6276	37.2548	1.04044	5e-05	0.00413767
ENSMUST00000029771	ENSMUSG00000028128	F3	chr3:121723536-121735048	42.9472	20.8941	1.03947	5e-05	0.00413767
ENSMUST00000113314	ENSMUSG00000029273	Sult1d1	chr5:87554644-87569027	16.8354	8.20363	1.03717	5e-05	0.00413767
ENSMUST00000036991	ENSMUSG00000041548	Hspb8	chr5:116408490-116422864	40.1261	19.5635	1.03638	5e-05	0.00413767
ENSMUST00000062069	ENSMUSG00000047250	Ptgs1	chr2:36230425-36252272	48.98	23.9505	1.03214	5e-05	0.00413767
ENSMUST00000039323	ENSMUSG00000042510	AA986860	chr1:130731975-130744622	40.0654	19.5969	1.03173	5e-05	0.00413767
ENSMUST00000146905	ENSMUSG00000047446	Arl4a	chr12:40033290-40038025	14.1298	6.91141	1.03169	0.00015	0.0105044
ENSMUST00000068237	ENSMUSG00000038342	Mlxip	chr5:123393648-123457932	26.9719	13.2067	1.03019	5e-05	0.00413767
ENSMUST00000095078	ENSMUSG00000007476	Lrrc8a	chr2:30237714-30263790	55.4209	27.1463	1.02968	5e-05	0.00413767
ENSMUST00000040357	ENSMUSG00000040723	Rcsd1	chr1:165646515-165709393	47.6879	23.3791	1.0284	5e-05	0.00413767
ENSMUST00000197679	ENSMUSG00000027947	Il6ra	chr3:89864058-89913196	10.3018	5.08579	1.01836	0.0001	0.00752154
ENSMUST00000102486	ENSMUSG00000006221	Hspb7	chr4:141420778-141425311	7.16901	3.54116	1.01755	0.0005	0.0280447
ENSMUST00000004622	ENSMUSG00000004508	Gab2	chr7:97081585-97308946	21.3942	10.5746	1.01662	5e-05	0.00413767
ENSMUST00000043414	ENSMUSG00000036661	Dennd3	chr15:73512559-73572242	47.6702	23.5652	1.01643	5e-05	0.00413767
ENSMUST00000042701	ENSMUSG00000037235	Mxd4	chr5:34173886-34187720	103.605	51.3647	1.01224	5e-05	0.00413767
ENSMUST00000046977	ENSMUSG00000039167	Adgrl4	chr3:151437886-151545086	99.8491	49.6556	1.00779	5e-05	0.00413767
ENSMUST00000087659	ENSMUSG00000042807	Hecw2	chr1:53806875-54195034	19.2839	9.59195	1.0075	5e-05	0.00413767
ENSMUST00000019998	ENSMUSG00000019851	Perp	chr10:18845019-18857073	21.3605	10.6369	1.00586	0.0001	0.00752154
ENSMUST00000020702	ENSMUSG00000020427	Igfbp3	chr11:7206085-7213923	29.6171	14.7837	1.00243	5e-05	0.00413767
ENSMUST00000161576	ENSMUSG00000031770	Herpud1	chr8:94377920-94395377	115.959	57.9376	1.00105	5e-05	0.00413767

## Sheet: 7d Vs 0d
Identification of DETs in the comparison between day 7 and day 0 in the VILI group
Transcript ID	Gene ID	Gene symbol	Gene location	VILI 7d FPKM	VILI day 0 FPKM	Log2 (Fold Change)	p-value	q-value
ENSMUST00000067492	ENSMUSG00000054422	Fabp1	chr6:71199826-71205023	0.888976	7.90188	-3.15198	0.0007	0.0362738
ENSMUST00000059449	ENSMUSG00000050097	Ces2b	chr8:104831571-104840093	0.127573	1.05166	-3.04328	5e-05	0.00413767
ENSMUST00000119096	ENSMUSG00000079852	Klra4	chr6:130043730-130067271	0.193032	1.57644	-3.02976	0.00055	0.0301111
ENSMUST00000110521	ENSMUSG00000079071	Gm14085	chr2:122484940-122528040	0.120423	0.757466	-2.65307	0.00015	0.0105044
ENSMUST00000059667	ENSMUSG00000046093	Hpcal4	chr4:123183226-123194701	0.195348	1.19513	-2.61305	0.0004	0.0235705
ENSMUST00000112063	ENSMUSG00000030165	Klrd1	chr6:129591781-129598775	0.868327	5.26189	-2.59927	5e-05	0.00413767
ENSMUST00000012847	ENSMUSG00000031494	Cd209a	chr8:3743396-3748984	0.837112	4.83036	-2.52864	0.0002	0.0133323
ENSMUST00000034865	ENSMUSG00000032315	Cyp1a1	chr9:57687927-57703824	6.07404	34.9448	-2.52435	5e-05	0.00413767
ENSMUST00000057428	ENSMUSG00000044951	Mylk4	chr13:32700826-32781779	0.122686	0.685025	-2.48119	5e-05	0.00413767
ENSMUST00000085876	ENSMUSG00000066677	Ifi208	chr1:173673679-173698392	2.15912	11.932	-2.46632	5e-05	0.00413767
ENSMUST00000082321	ENSMUSG00000026616	Cr2	chr1:195131617-195186352	0.17235	0.935921	-2.44105	0.001	0.0477064
ENSMUST00000029017	ENSMUSG00000027513	Pck1	chr2:173153047-173159273	0.676476	3.58401	-2.40546	5e-05	0.00413767
ENSMUST00000006749	ENSMUSG00000006574	Slc4a1	chr11:102348823-102365280	0.406204	2.14705	-2.40208	5e-05	0.00413767
ENSMUST00000169159	ENSMUSG00000024673	Ms4a1	chr19:11249674-11266241	0.98426	4.70564	-2.25728	5e-05	0.00413767
ENSMUST00000111026	ENSMUSG00000041644	Slc5a12	chr2:110597297-110647779	0.526895	2.48673	-2.23866	5e-05	0.00413767
ENSMUST00000000687	ENSMUSG00000000673	Haao	chr17:83831355-83846790	0.504769	2.38163	-2.23825	0.00025	0.016035
ENSMUST00000030782	ENSMUSG00000028940	Hes2	chr4:152158866-152162469	0.209006	0.957954	-2.19641	0.00065	0.0342624
ENSMUST00000023897	ENSMUSG00000023132	Gzma	chr13:113093824-113100979	3.87159	17.6775	-2.19091	5e-05	0.00413767
ENSMUST00000095342	ENSMUSG00000041538	H2-Ob	chr17:34238902-34245907	1.73204	7.80706	-2.17231	5e-05	0.00413767
ENSMUST00000087328	ENSMUSG00000091971	Hspa1a	chr17:34969189-34972156	2.99814	13.0163	-2.11817	5e-05	0.00413767
ENSMUST00000040250	ENSMUSG00000039783	Kmo	chr1:175631995-175662116	0.482958	2.08616	-2.11088	0.0006	0.0322352
ENSMUST00000038829	ENSMUSG00000042474	Fcmr	chr1:130865668-130880791	1.62235	6.95145	-2.09923	5e-05	0.00413767
ENSMUST00000172753	ENSMUSG00000090877	Hspa1b	chr17:34956435-34959238	3.51381	14.7818	-2.07272	5e-05	0.00413767
ENSMUST00000145984	ENSMUSG00000052736	Klrc2	chr6:129647495-129660689	0.270888	1.12352	-2.05226	0.00065	0.0342624
ENSMUST00000050385	ENSMUSG00000043932	Klri2	chr6:129729040-129740484	0.199816	0.792895	-1.98846	0.00065	0.0342624
ENSMUST00000032968	ENSMUSG00000030724	Cd19	chr7:126408450-126414889	0.81607	3.22345	-1.98184	0.0008	0.0401414
ENSMUST00000003469	ENSMUSG00000003379	Cd79a	chr7:24897380-24902197	3.83981	15.0929	-1.97476	5e-05	0.00413767
ENSMUST00000112027	ENSMUSG00000057606	Colq	chr14:31523081-31591343	0.840402	3.30047	-1.97352	0.00055	0.0301111
ENSMUST00000100691	ENSMUSG00000072601	Ear1	chr14:43818764-43875517	9.79853	37.7106	-1.94433	5e-05	0.00413767
ENSMUST00000034602	ENSMUSG00000032094	Cd3d	chr9:44981785-44987339	1.04492	4.00439	-1.93818	0.0001	0.00752154
ENSMUST00000005592	ENSMUSG00000030468	Siglecg	chr7:43408203-43418358	0.645208	2.47062	-1.93704	0.0002	0.0133323
ENSMUST00000065248	ENSMUSG00000053044	Cd8b1	chr6:71322787-71337494	1.09126	4.06383	-1.89685	5e-05	0.00413767
ENSMUST00000029671	ENSMUSG00000028037	Ifi44	chr3:151730921-151749960	1.17531	4.34164	-1.88519	5e-05	0.00413767
ENSMUST00000063359	ENSMUSG00000051839	Gypa	chr8:80493780-80510542	0.351335	1.29205	-1.87874	0.0009	0.0440307
ENSMUST00000014174	ENSMUSG00000014030	Pax5	chr4:44524756-44710487	0.613024	2.25369	-1.87827	5e-05	0.00413767
ENSMUST00000037481	ENSMUSG00000033082	Clec1a	chr6:129424771-129452000	14.1457	51.3859	-1.86101	5e-05	0.00413767
ENSMUST00000035938	ENSMUSG00000035042	Ccl5	chr11:83525777-83530518	12.5977	45.6858	-1.85859	5e-05	0.00413767
ENSMUST00000035258	ENSMUSG00000056290	Ms4a4b	chr19:11443572-11463549	4.86409	17.5203	-1.84878	5e-05	0.00413767
ENSMUST00000056071	ENSMUSG00000043263	Ifi209	chr1:173630916-173647928	2.26392	8.14581	-1.84724	5e-05	0.00413767
ENSMUST00000040404	ENSMUSG00000034634	Ly6d	chr15:74762055-74763620	2.11089	7.54071	-1.83685	0.0003	0.0186561
ENSMUST00000160565	ENSMUSG00000037849	Ifi206	chr1:173468484-173491041	1.19086	4.24546	-1.83392	5e-05	0.00413767
ENSMUST00000031239	ENSMUSG00000029299	Abcg3	chr5:104935056-104982718	0.684546	2.41935	-1.8214	0.00025	0.016035
ENSMUST00000070518	ENSMUSG00000004612	Nkg7	chr7:43437072-43438249	1.96911	6.91412	-1.81201	0.0005	0.0280447
ENSMUST00000203162	ENSMUSG00000033082	Clec1a	chr6:129424771-129452000	10.0585	34.2328	-1.76696	5e-05	0.00413767
ENSMUST00000087033	ENSMUSG00000067149	Jchain	chr5:88520511-88527891	4.57586	15.572	-1.76684	5e-05	0.00413767
ENSMUST00000041982	ENSMUSG00000037548	H2-DMb2	chr17:34145270-34151553	2.55936	8.66669	-1.7597	5e-05	0.00413767
ENSMUST00000028859	ENSMUSG00000027380	Acoxl	chr2:127854627-128123873	4.54718	15.3687	-1.75695	5e-05	0.00413767
ENSMUST00000164192	ENSMUSG00000071042	Rasgrp3	chr17:75435904-75529043	4.88844	16.4762	-1.75294	5e-05	0.00413767
ENSMUST00000029076	ENSMUSG00000027559	Car3	chr3:14863537-14872523	10.2206	33.7947	-1.72531	5e-05	0.00413767
ENSMUST00000204036	ENSMUSG00000039264	Gimap3	chr6:48764463-48770851	3.01187	9.9218	-1.71994	5e-05	0.00413767
ENSMUST00000095923	ENSMUSG00000021880	Rnase6	chr14:51129067-51131122	1.99797	6.56335	-1.7159	0.0002	0.0133323
ENSMUST00000023593	ENSMUSG00000022878	Adipoq	chr16:23146535-23158028	2.14007	6.80901	-1.66979	5e-05	0.00413767
ENSMUST00000103134	ENSMUSG00000037944	Ccr7	chr11:99144195-99155077	2.56862	8.06094	-1.64995	5e-05	0.00413767
ENSMUST00000023356	ENSMUSG00000022676	Snai2	chr16:14705851-14709395	2.13313	6.61379	-1.63251	5e-05	0.00413767
ENSMUST00000099449	ENSMUSG00000074867	Zfp808	chr13:62129915-62173419	0.71427	2.21435	-1.63234	0.00045	0.0259452
ENSMUST00000166121	ENSMUSG00000091649	Phf11b	chr14:59320963-59341351	1.33693	4.12758	-1.62637	0.0003	0.0186561
ENSMUST00000035155	ENSMUSG00000032549	Rab6b	chr9:103111786-103185276	6.33014	19.1336	-1.5958	5e-05	0.00413767
ENSMUST00000043077	ENSMUSG00000035686	Thrsp	chr7:97412937-97417730	2.25701	6.79544	-1.59016	0.0002	0.0133323
ENSMUST00000020949	ENSMUSG00000020623	Map2k6	chr11:110399121-110525522	1.00752	2.98056	-1.56477	0.00105	0.0494336
ENSMUST00000090025	ENSMUSG00000068522	Aard	chr15:52040106-52045722	2.3947	7.00487	-1.54851	0.00025	0.016035
ENSMUST00000058352	ENSMUSG00000046080	Clec9a	chr6:129408861-129424763	7.37151	21.5565	-1.54809	5e-05	0.00413767
ENSMUST00000034911	ENSMUSG00000032357	Tinag	chr9:76951692-77045794	2.22229	6.49583	-1.54747	0.00015	0.0105044
ENSMUST00000053375	ENSMUSG00000050921	P2ry10	chrX:107088491-107104974	2.56116	7.48404	-1.54702	5e-05	0.00413767
ENSMUST00000052072	ENSMUSG00000043664	Tmem221	chr8:71554237-71558871	1.37161	3.97139	-1.53378	0.00085	0.0421601
ENSMUST00000035419	ENSMUSG00000037202	Prf1	chr10:61297835-61304263	0.686483	1.98697	-1.53328	0.0007	0.0362738
ENSMUST00000102832	ENSMUSG00000032093	Cd3e	chr9:44998739-45009613	2.74864	7.91593	-1.52604	0.00045	0.0259452
ENSMUST00000014597	ENSMUSG00000014453	Blk	chr14:63372836-63417187	0.913357	2.62503	-1.52308	0.00025	0.016035
ENSMUST00000031707	ENSMUSG00000029695	Aass	chr6:23072172-23132986	0.991132	2.82667	-1.51196	5e-05	0.00413767
ENSMUST00000113760	ENSMUSG00000053835	H2-T24	chr17:36005694-36020560	5.05287	14.4032	-1.51122	5e-05	0.00413767
ENSMUST00000100069	ENSMUSG00000057182	Scn3a	chr2:65457117-65567627	1.74683	4.89594	-1.48685	5e-05	0.00413767
ENSMUST00000021822	ENSMUSG00000021390	Ogn	chr13:49464026-49652746	82.0667	229.732	-1.48508	5e-05	0.00413767
ENSMUST00000034056	ENSMUSG00000031639	Tlr3	chr8:45395664-45410760	1.88136	5.14774	-1.45216	0.00065	0.0342624
ENSMUST00000085786	ENSMUSG00000036526	Card11	chr5:140872989-141000582	2.19308	5.98408	-1.44817	5e-05	0.00413767
ENSMUST00000023732	ENSMUSG00000022996	Wnt10b	chr15:98771752-98778150	1.31897	3.59147	-1.44516	0.0002	0.0133323
ENSMUST00000057410	ENSMUSG00000006369	Fbln1	chr15:85205948-85286535	4.39829	11.9539	-1.44247	0.001	0.0477064
ENSMUST00000103141	ENSMUSG00000018168	Ikzf3	chr11:98464901-98545800	2.20694	5.98363	-1.43897	5e-05	0.00413767
ENSMUST00000110391	ENSMUSG00000016756	Cmah	chr13:24327419-24477285	1.62973	4.41542	-1.43791	5e-05	0.00413767
ENSMUST00000025311	ENSMUSG00000024440	Pcdh12	chr18:38267091-38284402	1.91599	5.17259	-1.4328	0.00025	0.016035
ENSMUST00000020664	ENSMUSG00000020395	Itk	chr11:46325149-46389515	1.38107	3.70573	-1.42397	0.0002	0.0133323
ENSMUST00000049184	ENSMUSG00000034911	Ushbp1	chr8:71385368-71395785	7.83246	20.8674	-1.41371	5e-05	0.00413767
ENSMUST00000028233	ENSMUSG00000026874	Hc	chr2:34983330-35061438	71.2173	189.557	-1.41233	5e-05	0.00413767
ENSMUST00000074839	ENSMUSG00000072596	Ear2	chr14:44102653-44103534	47.5282	126.37	-1.41079	5e-05	0.00413767
ENSMUST00000043336	ENSMUSG00000040710	St8sia4	chr1:95587681-95667571	7.09089	18.8246	-1.40858	5e-05	0.00413767
ENSMUST00000025004	ENSMUSG00000032915	Adgre4	chr17:55749983-55853662	1.00065	2.64572	-1.40272	0.0003	0.0186561
ENSMUST00000043149	ENSMUSG00000042351	Grap2	chr15:80623504-80650559	1.7268	4.52908	-1.39112	0.00015	0.0105044
ENSMUST00000109255	ENSMUSG00000036158	Prickle1	chr15:93499113-93595891	6.85415	17.8523	-1.38106	0.0007	0.0362738
ENSMUST00000167143	ENSMUSG00000040592	Cd79b	chr11:106311340-106314762	5.50311	14.3043	-1.37813	5e-05	0.00413767
ENSMUST00000106766	ENSMUSG00000078606	Gm4070	chr7:105895138-106093337	0.547021	1.41592	-1.37208	0.00035	0.0211828
ENSMUST00000049941	ENSMUSG00000049281	Scn3b	chr9:40269216-40291618	6.72855	17.3524	-1.36677	0.0001	0.00752154
ENSMUST00000050958	ENSMUSG00000049555	Tmie	chr9:110865710-110880113	0.832065	2.14394	-1.3655	0.00065	0.0342624
ENSMUST00000028384	ENSMUSG00000027001	Dusp19	chr2:80617044-80631661	1.4728	3.78824	-1.36296	0.0005	0.0280447
ENSMUST00000048183	ENSMUSG00000041559	Fmod	chr1:134037253-134048277	1.27192	3.24834	-1.3527	0.00035	0.0211828
ENSMUST00000044729	ENSMUSG00000037973	Ccdc129	chr6:55836894-55978622	1.21085	3.00737	-1.31248	0.00015	0.0105044
ENSMUST00000031238	ENSMUSG00000029298	Gbp9	chr5:105014152-105139586	5.72638	14.194	-1.30959	0.0006	0.0322352
ENSMUST00000055071	ENSMUSG00000079017	Ifi27l2a	chr12:103442166-103443680	44.48	109.403	-1.29843	5e-05	0.00413767
ENSMUST00000178884	ENSMUSG00000027347	Rasgrp1	chr2:117279992-117343001	1.18223	2.90731	-1.29818	0.0001	0.00752154
ENSMUST00000020970	ENSMUSG00000020641	Rsad2	chr12:26442752-26456452	2.35764	5.78988	-1.29619	5e-05	0.00413767
ENSMUST00000044311	ENSMUSG00000032649	Colgalt2	chr1:152399829-152510695	2.92773	7.1474	-1.28764	5e-05	0.00413767
ENSMUST00000102790	ENSMUSG00000035407	Kank4	chr4:98754897-98817537	1.58136	3.85849	-1.28687	0.00015	0.0105044
ENSMUST00000082411	ENSMUSG00000064360	mt-Nd3	chrMT:9458-9806	83.3031	202.284	-1.27994	5e-05	0.00413767
ENSMUST00000036019	ENSMUSG00000034687	Fras1	chr5:96373954-96784728	0.694526	1.68352	-1.27738	5e-05	0.00413767
ENSMUST00000024595	ENSMUSG00000023828	Slc22a3	chr17:12419971-12507704	0.891838	2.16147	-1.27716	0.00075	0.0382387
ENSMUST00000046383	ENSMUSG00000039304	Tnfsf10	chr3:27317027-27342427	6.94058	16.7801	-1.27362	5e-05	0.00413767
ENSMUST00000049787	ENSMUSG00000043110	Lrrn4	chr2:132868304-132880891	2.22689	5.36475	-1.26848	0.0001	0.00752154
ENSMUST00000114732	ENSMUSG00000029869	Ephb6	chr6:41605481-41620509	0.947624	2.28277	-1.2684	0.00095	0.0458858
ENSMUST00000020896	ENSMUSG00000020577	Tspan13	chr12:36014556-36042489	52.0368	124.76	-1.26155	5e-05	0.00413767
ENSMUST00000045503	ENSMUSG00000037754	Ppp1r16b	chr2:158665397-158766334	13.2016	31.6288	-1.26052	5e-05	0.00413767
ENSMUST00000051809	ENSMUSG00000046916	Myct1	chr10:5593774-5606904	6.16684	14.6458	-1.24788	5e-05	0.00413767
ENSMUST00000022122	ENSMUSG00000021622	Ckmt2	chr13:91853386-91876885	2.7035	6.36995	-1.23646	0.001	0.0477064
ENSMUST00000034932	ENSMUSG00000032372	Plscr2	chr9:92275601-92297752	7.17147	16.8811	-1.23507	0.00095	0.0458858
ENSMUST00000055693	ENSMUSG00000015224	Cyp2j9	chr4:96568428-96591578	1.48624	3.4961	-1.23408	0.00105	0.0494336
ENSMUST00000020969	ENSMUSG00000020638	Cmpk2	chr12:26469203-26479835	3.39416	7.95213	-1.22829	5e-05	0.00413767
ENSMUST00000029964	ENSMUSG00000028289	Epha7	chr4:28813130-28967499	0.94542	2.21471	-1.22809	0.0009	0.0440307
ENSMUST00000015498	ENSMUSG00000015354	Pcolce2	chr9:95637600-95698096	20.5083	47.7855	-1.22037	5e-05	0.00413767
ENSMUST00000102921	ENSMUSG00000020469	Myl7	chr11:5896636-5898782	32.7669	76.0604	-1.21491	0.0001	0.00752154
ENSMUST00000029670	ENSMUSG00000028036	Ptgfr	chr3:151796501-151837630	1.5475	3.58621	-1.21252	0.0001	0.00752154
ENSMUST00000047812	ENSMUSG00000035000	Dpp4	chr2:62330072-62470913	12.1706	28.2016	-1.21237	5e-05	0.00413767
ENSMUST00000090746	ENSMUSG00000027875	Hmgcs2	chr3:98280434-98310738	5.82452	13.4725	-1.20981	5e-05	0.00413767
ENSMUST00000014957	ENSMUSG00000014813	Stc1	chr14:69029288-69041401	3.12658	7.09391	-1.182	5e-05	0.00413767
ENSMUST00000039026	ENSMUSG00000037010	Apln	chrX:48025145-48034853	5.50572	12.4859	-1.1813	0.00015	0.0105044
ENSMUST00000051572	ENSMUSG00000045954	Sdpr	chr1:51289125-51302960	138.595	314.113	-1.18041	5e-05	0.00413767
ENSMUST00000043183	ENSMUSG00000031877	Ces2g	chr8:104961717-104969537	3.35165	7.57613	-1.17659	5e-05	0.00413767
ENSMUST00000025862	ENSMUSG00000024921	Smarca2	chr19:26605049-26823907	16.8175	37.9948	-1.17584	0.00015	0.0105044
ENSMUST00000074262	ENSMUSG00000059588	Calcrl	chr2:84330625-84425411	103.451	233.421	-1.17399	0.00055	0.0301111
ENSMUST00000028755	ENSMUSG00000027293	Ehd4	chr2:120089174-120154606	92.4481	207.969	-1.16965	5e-05	0.00413767
ENSMUST00000057019	ENSMUSG00000044338	Aplnr	chr2:85136224-85139923	7.27041	16.3213	-1.16665	5e-05	0.00413767
ENSMUST00000023750	ENSMUSG00000023011	Faim2	chr15:99497004-99528017	1.57594	3.5303	-1.16358	0.00035	0.0211828
ENSMUST00000031542	ENSMUSG00000029561	Oasl2	chr5:114896935-114912234	6.37018	14.2207	-1.15859	5e-05	0.00413767
ENSMUST00000081769	ENSMUSG00000034488	Edil3	chr13:88821471-89323223	3.32318	7.41419	-1.15772	0.00015	0.0105044
ENSMUST00000073312	ENSMUSG00000067928	Zfp760	chr17:21707740-21725636	2.60618	5.79044	-1.15174	5e-05	0.00413767
ENSMUST00000048432	ENSMUSG00000041577	Prelp	chr1:133910303-133921414	54.005	119.813	-1.14962	5e-05	0.00413767
ENSMUST00000022051	ENSMUSG00000021567	Nkd2	chr13:73818533-73847631	2.55312	5.64107	-1.14371	0.0003	0.0186561
ENSMUST00000105283	ENSMUSG00000019966	Kitl	chr10:100015629-100100413	32.0442	70.5752	-1.1391	5e-05	0.00413767
ENSMUST00000172031	ENSMUSG00000037940	Inpp4b	chr8:81342557-82127914	3.25085	7.15634	-1.1384	5e-05	0.00413767
ENSMUST00000147041	ENSMUSG00000040969	Arhgef38	chr3:133112277-133234949	5.50753	12.1157	-1.1374	5e-05	0.00413767
ENSMUST00000163230	ENSMUSG00000022661	Cd200	chr16:45382134-45409053	42.8101	94.0222	-1.13505	5e-05	0.00413767
ENSMUST00000106373	ENSMUSG00000030711	Sult1a1	chr7:126649308-126676432	44.5624	97.5303	-1.13002	5e-05	0.00413767
ENSMUST00000090070	ENSMUSG00000054435	Gimap4	chr6:48684548-48692060	21.4304	46.8503	-1.1284	0.0001	0.00752154
ENSMUST00000074557	ENSMUSG00000060586	H2-Eb1	chr17:34305876-34316199	65.1972	142.221	-1.12525	5e-05	0.00413767
ENSMUST00000061653	ENSMUSG00000061780	Cfd	chr10:79890852-79892656	28.3465	61.8124	-1.12472	0.00015	0.0105044
ENSMUST00000026890	ENSMUSG00000025784	Clec3b	chr9:123150945-123157432	28.6179	62.355	-1.12359	5e-05	0.00413767
ENSMUST00000047480	ENSMUSG00000041482	Piezo2	chr18:63010212-63387183	4.43965	9.64516	-1.11936	5e-05	0.00413767
ENSMUST00000020346	ENSMUSG00000020137	Thap2	chr10:115369965-115384435	2.54547	5.4745	-1.10479	0.00045	0.0259452
ENSMUST00000076354	ENSMUSG00000058254	Tspan7	chrX:10485157-10596605	146.993	314.871	-1.09901	5e-05	0.00413767
ENSMUST00000114294	ENSMUSG00000029802	Abcg2	chr6:58584522-58695676	12.7263	27.1711	-1.09426	0.0003	0.0186561
ENSMUST00000045097	ENSMUSG00000040253	Gbp7	chr3:142530341-142550149	6.50673	13.8573	-1.09064	5e-05	0.00413767
ENSMUST00000076623	ENSMUSG00000037999	Arap2	chr5:62602444-62766159	16.2823	34.5994	-1.08744	5e-05	0.00413767
ENSMUST00000020759	ENSMUSG00000020467	Efemp1	chr11:28853203-28926743	25.548	53.3789	-1.06306	5e-05	0.00413767
ENSMUST00000024984	ENSMUSG00000024168	Tmem204	chr17:25016090-25099487	69.4984	144.851	-1.05952	5e-05	0.00413767
ENSMUST00000059037	ENSMUSG00000057143	Trim12c	chr7:104338753-104353362	7.33759	15.2929	-1.05948	5e-05	0.00413767
ENSMUST00000032260	ENSMUSG00000030157	Clec2d	chr6:129180614-129186534	138.807	289.137	-1.05868	5e-05	0.00413767
ENSMUST00000071135	ENSMUSG00000062591	Tubb4a	chr17:57080065-57087782	3.89226	8.1054	-1.05828	0.00065	0.0342624
ENSMUST00000061506	ENSMUSG00000036019	Tmtc2	chr10:105187662-105583874	9.98615	20.7791	-1.05713	5e-05	0.00413767
ENSMUST00000040655	ENSMUSG00000036594	H2-Aa	chr17:34282743-34287827	131.845	273.077	-1.05046	5e-05	0.00413767
ENSMUST00000042792	ENSMUSG00000034810	Scn7a	chr2:66673424-66784914	61.0573	125.801	-1.0429	0.00065	0.0342624
ENSMUST00000051672	ENSMUSG00000046718	Bst2	chr8:71534254-71537456	26.605	54.7074	-1.04004	0.0003	0.0186561
ENSMUST00000172278	ENSMUSG00000045613	Chrm2	chr6:36387378-36528414	6.21014	12.7697	-1.04002	5e-05	0.00413767
ENSMUST00000106956	ENSMUSG00000061086	Myl4	chr11:104550662-104595753	28.8688	59.2444	-1.03717	0.0001	0.00752154
ENSMUST00000022699	ENSMUSG00000022103	Gfra2	chr14:70890129-70979838	2.7039	5.53513	-1.03357	0.0008	0.0401414
ENSMUST00000046807	ENSMUSG00000037762	Slc16a9	chr10:70245099-70285968	21.8333	44.0651	-1.01311	5e-05	0.00413767
ENSMUST00000003981	ENSMUSG00000003882	Il7r	chr15:9506160-9529876	6.25674	12.6141	-1.01155	0.00025	0.016035
ENSMUST00000110221	ENSMUSG00000022371	Col14a1	chr15:55307749-55520803	5.01748	10.091	-1.00803	0.0009	0.0440307
ENSMUST00000028106	ENSMUSG00000026768	Itga8	chr2:12106631-12311300	32.3132	64.9291	-1.00674	0.00015	0.0105044
ENSMUST00000089874	ENSMUSG00000071856	Mcc	chr18:44425059-44812182	11.6618	23.3706	-1.0029	5e-05	0.00413767
ENSMUST00000039046	ENSMUSG00000041872	Il17f	chr1:20777145-20790617	0.537658	0	inf	5e-05	0.00413767
ENSMUST00000031356	ENSMUSG00000029409	U90926	chr5:92209892-92215408	1.88864	0	inf	5e-05	0.00413767
ENSMUST00000034488	ENSMUSG00000047562	Mmp10	chr9:7502351-7510240	1.90643	0	inf	5e-05	0.00413767
ENSMUST00000114850	ENSMUSG00000079594	BC117090	chr16:36321664-36334332	1.13744	0	inf	0.00055	0.0301111
ENSMUST00000006956	ENSMUSG00000040026	Saa3	chr7:46711997-46715700	4966.81	4.93954	9.97373	5e-05	0.00413767
ENSMUST00000001008	ENSMUSG00000000982	Ccl3	chr11:83647843-83650668	91.7332	0.834545	6.78031	5e-05	0.00413767
ENSMUST00000075433	ENSMUSG00000058427	Cxcl2	chr5:90903870-90905938	104.935	1.62839	6.00991	5e-05	0.00413767
ENSMUST00000031326	ENSMUSG00000029379	Cxcl3	chr5:90786102-90788093	15.8863	0.268922	5.88445	5e-05	0.00413767
ENSMUST00000023840	ENSMUSG00000023078	Cxcl13	chr5:95956950-95961068	69.6668	1.72663	5.33444	5e-05	0.00413767
ENSMUST00000042097	ENSMUSG00000071562	Stfa1	chr16:36277147-36285371	63.4522	1.61425	5.29673	5e-05	0.00413767
ENSMUST00000020161	ENSMUSG00000019987	Arg1	chr10:24915207-24927470	45.8399	1.36728	5.06723	5e-05	0.00413767
ENSMUST00000066905	ENSMUSG00000030077	Chl1	chr6:103510585-103750211	2.11359	0.0721368	4.87282	0.0001	0.00752154
ENSMUST00000023250	ENSMUSG00000022586	Ly6i	chr15:74979533-74983430	13.1127	0.679773	4.26977	5e-05	0.00413767
ENSMUST00000092836	ENSMUSG00000069792	Wfdc17	chr11:83703990-83706268	461.596	24.0632	4.26173	5e-05	0.00413767
ENSMUST00000031324	ENSMUSG00000029377	Ereg	chr5:91074621-91093646	1.10688	0.0581758	4.24994	5e-05	0.00413767
ENSMUST00000031327	ENSMUSG00000029380	Cxcl1	chr5:90891240-90893115	12.1143	0.648648	4.22313	5e-05	0.00413767
ENSMUST00000019074	ENSMUSG00000018930	Ccl4	chr11:83662583-83664683	24.4825	1.43929	4.08832	5e-05	0.00413767
ENSMUST00000166694	ENSMUSG00000022586	Ly6i	chr15:74979533-74983430	11.5556	0.748112	3.94919	0.00045	0.0259452
ENSMUST00000031318	ENSMUSG00000029371	Cxcl5	chr5:90759377-90761624	13.2198	0.858954	3.94398	5e-05	0.00413767
ENSMUST00000030044	ENSMUSG00000039196	Orm1	chr4:63344559-63348163	35.0123	2.35781	3.89234	5e-05	0.00413767
ENSMUST00000025263	ENSMUSG00000024401	Tnf	chr17:35199380-35202007	14.9071	1.01447	3.8772	5e-05	0.00413767
ENSMUST00000114858	ENSMUSG00000079597	Gm5483	chr16:36184211-36188111	171.492	11.9556	3.84238	5e-05	0.00413767
ENSMUST00000027639	ENSMUSG00000026390	Marco	chr1:120474537-120505024	76.0887	5.48363	3.79448	5e-05	0.00413767
ENSMUST00000000193	ENSMUSG00000035385	Ccl2	chr11:82028223-82038562	7.58066	0.57591	3.71841	5e-05	0.00413767
ENSMUST00000047498	ENSMUSG00000033213	AA467197	chr2:122636985-122641191	30.5513	2.46366	3.63235	5e-05	0.00413767
ENSMUST00000079184	ENSMUSG00000059657	Stfa2l1	chr16:36156810-36161948	188.047	15.5273	3.59822	5e-05	0.00413767
ENSMUST00000031840	ENSMUSG00000029816	Gpnmb	chr6:49036614-49070929	53.2288	4.6506	3.51672	5e-05	0.00413767
ENSMUST00000021757	ENSMUSG00000021322	Aoah	chr13:20794118-21024252	7.55806	0.672497	3.49042	5e-05	0.00413767
ENSMUST00000042081	ENSMUSG00000040552	C3ar1	chr6:122847137-122856161	16.3145	1.47283	3.46949	5e-05	0.00413767
ENSMUST00000022722	ENSMUSG00000022126	Acod1	chr14:103034199-103056573	27.8061	2.60388	3.41667	5e-05	0.00413767
ENSMUST00000088735	ENSMUSG00000022026	Olfm4	chr14:80000301-80021930	3.11158	0.291848	3.41436	5e-05	0.00413767
ENSMUST00000003074	ENSMUSG00000002992	Apoc2	chr7:19671578-19681479	31.7555	3.05683	3.3769	5e-05	0.00413767
ENSMUST00000032203	ENSMUSG00000030111	A2m	chr6:121635375-121679227	1.2522	0.125549	3.31814	5e-05	0.00413767
ENSMUST00000024791	ENSMUSG00000023992	Trem2	chr17:48346400-48352273	15.9057	1.68747	3.23662	5e-05	0.00413767
ENSMUST00000070832	ENSMUSG00000051748	Wfdc21	chr11:83746939-83752642	249.233	26.9735	3.20788	5e-05	0.00413767
ENSMUST00000018610	ENSMUSG00000020826	Nos2	chr11:78920786-78960254	8.88942	0.98135	3.17925	5e-05	0.00413767
ENSMUST00000094337	ENSMUSG00000070524	Fcrlb	chr1:170907272-170912941	2.16302	0.240409	3.16948	0.0002	0.0133323
ENSMUST00000023520	ENSMUSG00000022824	Muc13	chr16:33794036-33819934	1.16111	0.130382	3.15469	0.0001	0.00752154
ENSMUST00000170521	ENSMUSG00000090487	Gm2888	chr14:3030001-3038762	0.918771	0.106161	3.11345	0.00105	0.0494336
ENSMUST00000028882	ENSMUSG00000027399	Il1a	chr2:129297369-129309972	11.6555	1.48082	2.97654	5e-05	0.00413767
ENSMUST00000074477	ENSMUSG00000062148	Ear6	chr14:51853698-51854643	8.0448	1.02514	2.97224	5e-05	0.00413767
ENSMUST00000063956	ENSMUSG00000052212	Cd177	chr7:24743982-24760311	23.6326	3.15136	2.90673	5e-05	0.00413767
ENSMUST00000050785	ENSMUSG00000026822	Lcn2	chr2:32384632-32388252	1186.64	158.331	2.90587	5e-05	0.00413767
ENSMUST00000043400	ENSMUSG00000033508	Asprv1	chr6:86628163-86629710	39.6864	5.31219	2.90127	5e-05	0.00413767
ENSMUST00000067715	ENSMUSG00000054582	Pabpc1l	chr2:164025449-164050538	1.68469	0.229833	2.87383	5e-05	0.00413767
ENSMUST00000039160	ENSMUSG00000040133	Gpr176	chr2:118277109-118373419	0.611195	0.084118	2.86115	0.0001	0.00752154
ENSMUST00000009329	ENSMUSG00000009185	Ccl8	chr11:82115184-82116799	33.1165	4.61227	2.844	5e-05	0.00413767
ENSMUST00000015664	ENSMUSG00000028111	Ctsk	chr3:95499255-95509362	83.1163	11.7522	2.8222	5e-05	0.00413767
ENSMUST00000022592	ENSMUSG00000022015	Tnfsf11	chr14:78277444-78308043	1.71941	0.247282	2.79769	5e-05	0.00413767
ENSMUST00000067532	ENSMUSG00000024672	Ms4a7	chr19:11321038-11336144	8.10583	1.17591	2.78518	5e-05	0.00413767
ENSMUST00000099575	ENSMUSG00000074934	Grem1	chr2:113746163-113758646	1.68816	0.251079	2.74924	5e-05	0.00413767
ENSMUST00000042740	ENSMUSG00000004668	Abca13	chr11:9191941-9684259	0.747877	0.117125	2.67475	5e-05	0.00413767
ENSMUST00000005548	ENSMUSG00000005413	Hmox1	chr8:75093620-75100589	131.437	20.979	2.64735	5e-05	0.00413767
ENSMUST00000035471	ENSMUSG00000032796	Lama1	chr17:67697264-67822645	0.494359	0.0792382	2.64129	5e-05	0.00413767
ENSMUST00000001253	ENSMUSG00000020651	Slc26a4	chr12:31519826-31559969	3.35265	0.545475	2.61972	5e-05	0.00413767
ENSMUST00000034214	ENSMUSG00000031762	Mt2	chr8:94172663-94173568	1006.88	168.5	2.57908	5e-05	0.00413767
ENSMUST00000015394	ENSMUSG00000050578	Mmp13	chr9:7272513-7283331	1.00255	0.169234	2.56658	0.0004	0.0235705
ENSMUST00000006392	ENSMUSG00000021403	Serpinb9b	chr13:33027415-33041884	1.47144	0.249704	2.55893	5e-05	0.00413767
ENSMUST00000074740	ENSMUSG00000061039	Olfr920	chr9:38752298-38756739	5.93115	1.01882	2.54141	5e-05	0.00413767
ENSMUST00000023806	ENSMUSG00000023045	Soat2	chr15:102150525-102163474	3.21317	0.554934	2.53361	5e-05	0.00413767
ENSMUST00000035061	ENSMUSG00000032484	Ngp	chr9:110419746-110423012	34.0101	5.95955	2.51269	5e-05	0.00413767
ENSMUST00000030339	ENSMUSG00000028602	Tnfrsf8	chr4:145267136-145315147	0.730583	0.130531	2.48466	0.0002	0.0133323
ENSMUST00000040359	ENSMUSG00000036412	Arsi	chr18:60911779-60918561	0.880153	0.159986	2.45981	0.00025	0.016035
ENSMUST00000023329	ENSMUSG00000061100	Retnla	chr16:48842551-48844461	422.981	77.2478	2.45303	5e-05	0.00413767
ENSMUST00000187467	ENSMUSG00000099398	Ms4a14	chr19:11301248-11314454	0.869073	0.163556	2.40969	5e-05	0.00413767
ENSMUST00000039516	ENSMUSG00000035105	Egln3	chr12:54178980-54203860	3.89079	0.745668	2.38346	5e-05	0.00413767
ENSMUST00000029297	ENSMUSG00000027737	Slc7a11	chr3:49892525-50443614	9.89115	1.91222	2.37089	5e-05	0.00413767
ENSMUST00000046498	ENSMUSG00000042357	Gjb5	chr4:127354808-127358181	0.88912	0.172271	2.3677	0.0007	0.0362738
ENSMUST00000107377	ENSMUSG00000028364	Tnc	chr4:63959784-64047015	15.0352	2.9662	2.34166	5e-05	0.00413767
ENSMUST00000002926	ENSMUSG00000002847	Pla1a	chr16:38396118-38433145	6.54227	1.31298	2.31695	5e-05	0.00413767
ENSMUST00000021971	ENSMUSG00000021509	Slc25a48	chr13:56438354-56474239	0.49576	0.101523	2.28783	0.0007	0.0362738
ENSMUST00000164993	ENSMUSG00000041324	Inhba	chr13:16011850-16027211	3.73498	0.770485	2.27726	5e-05	0.00413767
ENSMUST00000027748	ENSMUSG00000026475	Rgs16	chr1:153740348-153749324	1.70435	0.352558	2.27329	0.00045	0.0259452
ENSMUST00000115421	ENSMUSG00000012428	Steap4	chr5:7960456-7982213	31.8624	6.6825	2.2534	5e-05	0.00413767
ENSMUST00000063820	ENSMUSG00000031444	F10	chr8:13037307-13056676	3.77466	0.794397	2.24841	0.00095	0.0458858
ENSMUST00000054599	ENSMUSG00000050359	Sprr1a	chr3:92483951-92485895	6.50989	1.37177	2.24659	0.0001	0.00752154
ENSMUST00000053355	ENSMUSG00000050967	Creg2	chr1:39618405-39651474	0.505772	0.107177	2.23849	0.00015	0.0105044
ENSMUST00000056336	ENSMUSG00000050511	Oprd1	chr4:132110725-132144486	0.532824	0.113505	2.2309	0.00025	0.016035
ENSMUST00000046384	ENSMUSG00000036905	C1qb	chr4:136880128-136886187	101.181	21.7191	2.21991	5e-05	0.00413767
ENSMUST00000050544	ENSMUSG00000022367	Has2	chr15:56665626-56694539	0.793323	0.171585	2.20898	5e-05	0.00413767
ENSMUST00000174355	ENSMUSG00000002985	Apoe	chr7:19696108-19699188	718.68	159.013	2.17621	0.00075	0.0382387
ENSMUST00000032573	ENSMUSG00000030413	Pglyrp1	chr7:18884679-18890441	103.64	22.9786	2.17322	5e-05	0.00413767
ENSMUST00000170091	ENSMUSG00000025044	Msr1	chr8:39581684-39642673	8.54879	1.9057	2.1654	0.00015	0.0105044
ENSMUST00000018918	ENSMUSG00000018774	Cd68	chr11:69664212-69666153	100.624	22.4665	2.16313	5e-05	0.00413767
ENSMUST00000099126	ENSMUSG00000074622	Mafb	chr2:160363702-160367065	16.9696	3.80498	2.15699	5e-05	0.00413767
ENSMUST00000032239	ENSMUSG00000030142	Clec4e	chr6:123281788-123289870	33.0124	7.42324	2.15289	5e-05	0.00413767
ENSMUST00000027368	ENSMUSG00000026177	Slc11a1	chr1:74375194-74386062	19.5302	4.49182	2.12033	5e-05	0.00413767
ENSMUST00000034215	ENSMUSG00000031765	Mt1	chr8:94179081-94180327	905.041	210.204	2.10619	5e-05	0.00413767
ENSMUST00000061829	ENSMUSG00000051439	Cd14	chr18:36725073-36726736	91.6848	21.3577	2.10193	5e-05	0.00413767
ENSMUST00000029919	ENSMUSG00000028255	Clca1	chr3:145003816-145032776	7.12073	1.67488	2.08797	5e-05	0.00413767
ENSMUST00000033821	ENSMUSG00000031444	F10	chr8:13037307-13056676	11.391	2.68146	2.0868	5e-05	0.00413767
ENSMUST00000070690	ENSMUSG00000056529	Ptafr	chr4:132564066-132582683	12.2093	2.88349	2.08209	5e-05	0.00413767
ENSMUST00000069245	ENSMUSG00000055561	Spink5	chr18:43963234-44022501	13.4788	3.20089	2.07415	5e-05	0.00413767
ENSMUST00000004201	ENSMUSG00000004098	Col5a3	chr9:20770049-20815067	5.64648	1.34923	2.06521	5e-05	0.00413767
ENSMUST00000031320	ENSMUSG00000029373	Pf4	chr5:90772434-90773383	83.5928	20.171	2.0511	5e-05	0.00413767
ENSMUST00000057023	ENSMUSG00000051048	P4ha3	chr7:100285519-100319699	1.38076	0.333937	2.04782	0.0001	0.00752154
ENSMUST00000032089	ENSMUSG00000030017	Reg3g	chr6:78466268-78468872	276.587	67.3011	2.03903	5e-05	0.00413767
ENSMUST00000112756	ENSMUSG00000055003	Lrtm2	chr6:119236525-119352407	9.68264	2.38081	2.02395	5e-05	0.00413767
ENSMUST00000101078	ENSMUSG00000079012	Serpina3m	chr12:104338485-104394257	17.9147	4.41262	2.02144	5e-05	0.00413767
ENSMUST00000188995	ENSMUSG00000101389	Ms4a4a	chr19:11375522-11392790	32.1677	8.11502	1.98695	5e-05	0.00413767
ENSMUST00000052296	ENSMUSG00000048776	Pthlh	chr6:147252100-147264183	1.62415	0.41422	1.97122	0.0009	0.0440307
ENSMUST00000046332	ENSMUSG00000036896	C1qc	chr4:136889803-136893065	72.39	18.5745	1.96247	5e-05	0.00413767
ENSMUST00000025582	ENSMUSG00000024679	Ms4a6d	chr19:11586603-11604849	32.3595	8.39228	1.94706	5e-05	0.00413767
ENSMUST00000081103	ENSMUSG00000026656	Fcgr2b	chr1:170958616-170976547	63.9567	16.6691	1.93992	5e-05	0.00413767
ENSMUST00000096356	ENSMUSG00000071714	Csf2rb2	chr15:78282516-78305603	12.3784	3.25035	1.92916	5e-05	0.00413767
ENSMUST00000020448	ENSMUSG00000020227	Irak3	chr10:120141647-120224917	17.8904	4.72685	1.92024	5e-05	0.00413767
ENSMUST00000081945	ENSMUSG00000047641	Krt87	chr15:101431489-101438804	1.22786	0.325971	1.91333	0.00075	0.0382387
ENSMUST00000022287	ENSMUSG00000021765	Fst	chr13:114452261-114458730	13.5654	3.65289	1.89282	5e-05	0.00413767
ENSMUST00000030551	ENSMUSG00000028766	Alpl	chr4:137741732-137796384	5.71435	1.56006	1.87299	5e-05	0.00413767
ENSMUST00000061516	ENSMUSG00000045551	Fpr1	chr17:17876470-17883940	40.2948	11.0897	1.86137	5e-05	0.00413767
ENSMUST00000065587	ENSMUSG00000044337	Ackr3	chr1:90203979-90216751	34.1187	9.39373	1.86079	5e-05	0.00413767
ENSMUST00000198128	ENSMUSG00000001025	S100a6	chr3:90612881-90614414	649.791	179.019	1.85986	5e-05	0.00413767
ENSMUST00000027243	ENSMUSG00000026073	Il1r2	chr1:40074078-40125231	69.1786	19.1504	1.85295	0.0001	0.00752154
ENSMUST00000062356	ENSMUSG00000047945	Marcksl1	chr4:129513580-129515985	31.1795	8.65991	1.84818	5e-05	0.00413767
ENSMUST00000108140	ENSMUSG00000020684	Rasl10b	chr11:83409136-83421039	3.6822	1.02954	1.83856	5e-05	0.00413767
ENSMUST00000027874	ENSMUSG00000026582	Sele	chr1:164048233-164057677	1.15025	0.328929	1.8061	0.00035	0.0211828
ENSMUST00000056089	ENSMUSG00000050777	Tmem37	chr1:120067376-120078069	59.0886	16.922	1.80398	5e-05	0.00413767
ENSMUST00000023295	ENSMUSG00000022622	Acr	chr15:89568325-89574585	1.68178	0.493237	1.76963	0.00105	0.0494336
ENSMUST00000021506	ENSMUSG00000021091	Serpina3n	chr12:104406728-104414329	184.838	54.267	1.76812	5e-05	0.00413767
ENSMUST00000110853	ENSMUSG00000074923	Pak6	chr2:118663302-118698020	5.75147	1.69182	1.76535	5e-05	0.00413767
ENSMUST00000197040	ENSMUSG00000028150	Rorc	chr3:94372793-94404501	6.0684	1.79266	1.75922	0.00045	0.0259452
ENSMUST00000060574	ENSMUSG00000047228	BC048546	chr6:128539826-128581608	12.608	3.72495	1.75904	5e-05	0.00413767
ENSMUST00000109958	ENSMUSG00000079014	Serpina3i	chr12:104263121-104269372	2.66555	0.788571	1.75712	5e-05	0.00413767
ENSMUST00000114236	ENSMUSG00000044162	Tnip3	chr6:65525312-65634040	1.08979	0.325006	1.74551	0.00095	0.0458858
ENSMUST00000027675	ENSMUSG00000026417	Pigr	chr1:130826683-130852249	43.8052	13.0911	1.74251	5e-05	0.00413767
ENSMUST00000038765	ENSMUSG00000037035	Inhbb	chr1:119415464-119422248	13.9445	4.25024	1.71408	5e-05	0.00413767
ENSMUST00000024706	ENSMUSG00000023913	Pla2g7	chr17:43568097-43612201	54.2822	16.5483	1.7138	5e-05	0.00413767
ENSMUST00000050562	ENSMUSG00000050370	Ch25h	chr19:34473785-34481546	11.7549	3.61132	1.70266	5e-05	0.00413767
ENSMUST00000084501	ENSMUSG00000028370	Pappa	chr4:65124173-65357509	2.8294	0.87306	1.69634	5e-05	0.00413767
ENSMUST00000079476	ENSMUSG00000032691	Nlrp3	chr11:59541567-59566956	8.19342	2.54086	1.68915	5e-05	0.00413767
ENSMUST00000052437	ENSMUSG00000049988	Lrrc25	chr8:70616154-70620890	15.4239	4.8064	1.68214	5e-05	0.00413767
ENSMUST00000025409	ENSMUSG00000024529	Lox	chr18:52516068-52529867	85.7361	26.8233	1.67642	0.00015	0.0105044
ENSMUST00000019997	ENSMUSG00000019850	Tnfaip3	chr10:19000909-19015657	28.6633	9.01054	1.66952	5e-05	0.00413767
ENSMUST00000164484	ENSMUSG00000090707	Gm8237	chr14:5857917-5880382	2.16202	0.684635	1.65898	0.00045	0.0259452
ENSMUST00000069927	ENSMUSG00000056054	S100a8	chr3:90668977-90670035	1382.54	437.862	1.65877	5e-05	0.00413767
ENSMUST00000148314	ENSMUSG00000087006	Gm13889	chr2:93955809-94010807	68.9934	21.9028	1.65534	5e-05	0.00413767
ENSMUST00000027997	ENSMUSG00000026678	Rgs5	chr1:169655500-169695813	16.363	5.19976	1.65392	5e-05	0.00413767
ENSMUST00000028881	ENSMUSG00000027398	Il1b	chr2:129364569-129375748	156.644	49.9016	1.65033	5e-05	0.00413767
ENSMUST00000139848	ENSMUSG00000034472	Rasd2	chr8:75213943-75224113	5.75568	1.83927	1.64585	5e-05	0.00413767
ENSMUST00000029771	ENSMUSG00000028128	F3	chr3:121723536-121735048	134.366	42.9472	1.64554	5e-05	0.00413767
ENSMUST00000022787	ENSMUSG00000022180	Slc7a8	chr14:54722215-54781886	5.52071	1.76738	1.64325	5e-05	0.00413767
ENSMUST00000178034	ENSMUSG00000022218	Tgm1	chr14:55700008-55713492	4.28416	1.37391	1.64072	0.0001	0.00752154
ENSMUST00000030036	ENSMUSG00000028351	Brinp1	chr4:68761513-68954397	1.81022	0.586378	1.62626	0.00015	0.0105044
ENSMUST00000079957	ENSMUSG00000058715	Fcer1g	chr1:171229571-171234365	194.842	63.2248	1.62374	5e-05	0.00413767
ENSMUST00000020586	ENSMUSG00000020334	Slc22a4	chr11:53983122-54028090	1.45556	0.473375	1.62052	0.00055	0.0301111
ENSMUST00000044642	ENSMUSG00000036718	Micall2	chr5:139706695-139736336	4.31981	1.41127	1.61397	5e-05	0.00413767
ENSMUST00000030336	ENSMUSG00000028599	Tnfrsf1b	chr4:145213462-145246870	44.2425	14.5176	1.60763	5e-05	0.00413767
ENSMUST00000017841	ENSMUSG00000017697	Ada	chr2:163726583-163750239	5.00667	1.64519	1.6056	5e-05	0.00413767
ENSMUST00000167598	ENSMUSG00000042306	S100a14	chr3:90526855-90528837	9.44397	3.11993	1.59788	0.00015	0.0105044
ENSMUST00000062108	ENSMUSG00000042349	Ikbke	chr1:131254596-131279606	9.62147	3.17892	1.59772	5e-05	0.00413767
ENSMUST00000097981	ENSMUSG00000073802	Cdkn2b	chr4:89306288-89311032	47.6268	15.7848	1.59324	5e-05	0.00413767
ENSMUST00000081380	ENSMUSG00000063975	Slco1a5	chr6:142234226-142322981	2.65405	0.881891	1.58952	0.0002	0.0133323
ENSMUST00000150290	ENSMUSG00000050335	Lgals3	chr14:47367750-47386160	267.493	89.1874	1.58459	5e-05	0.00413767
ENSMUST00000004913	ENSMUSG00000004791	Pgf	chr12:85166638-85177296	7.66015	2.56289	1.5796	5e-05	0.00413767
ENSMUST00000047687	ENSMUSG00000041608	Entpd3	chr9:120539817-120568327	6.3551	2.13164	1.57595	5e-05	0.00413767
ENSMUST00000102852	ENSMUSG00000050737	Ptges	chr2:30889470-30903297	12.7246	4.27596	1.5733	5e-05	0.00413767
ENSMUST00000069960	ENSMUSG00000056071	S100a9	chr3:90692631-90695721	1866.11	630.244	1.56605	5e-05	0.00413767
ENSMUST00000161804	ENSMUSG00000029673	Auts2	chr5:131437787-131616605	4.30053	1.46133	1.55723	0.0001	0.00752154
ENSMUST00000045374	ENSMUSG00000041046	Ramp3	chr11:6658520-6677475	8.49155	2.88981	1.55505	0.0002	0.0133323
ENSMUST00000038863	ENSMUSG00000035202	Lars2	chr9:123366926-123462664	66.0706	22.5329	1.55197	5e-05	0.00413767
ENSMUST00000036188	ENSMUSG00000042677	Zc3h12a	chr4:125118422-125127840	21.9562	7.53263	1.5434	5e-05	0.00413767
ENSMUST00000089688	ENSMUSG00000000957	Mmp14	chr14:54431611-54441265	73.8145	25.3936	1.53944	5e-05	0.00413767
ENSMUST00000046285	ENSMUSG00000036887	C1qa	chr4:136895916-136898803	83.5355	28.8102	1.53581	5e-05	0.00413767
ENSMUST00000106242	ENSMUSG00000030786	Itgam	chr7:128062639-128128160	25.2756	8.78575	1.52451	0.0008	0.0401414
ENSMUST00000059295	ENSMUSG00000049303	Syt12	chr19:4445907-4477447	1.33605	0.465446	1.52129	0.0001	0.00752154
ENSMUST00000005185	ENSMUSG00000005054	Cstb	chr10:78425669-78427619	188.757	66.1891	1.51186	5e-05	0.00413767
ENSMUST00000021607	ENSMUSG00000021190	Lgmn	chr12:102394083-102439813	85.3035	29.9423	1.51042	0.00065	0.0342624
ENSMUST00000062789	ENSMUSG00000044350	Lacc1	chr14:77024199-77036641	5.40356	1.89729	1.50997	5e-05	0.00413767
ENSMUST00000106040	ENSMUSG00000025491	Ifitm1	chr7:140967220-140969825	149.097	52.3926	1.50882	5e-05	0.00413767
ENSMUST00000014917	ENSMUSG00000014773	Dll1	chr17:15367353-15379475	20.1883	7.1003	1.50757	5e-05	0.00413767
ENSMUST00000081924	ENSMUSG00000059108	Ifitm6	chr7:141015698-141017924	42.0442	14.7933	1.50696	0.00025	0.016035
ENSMUST00000165205	ENSMUSG00000090958	Lrrc32	chr7:98489282-98502181	38.2775	13.5816	1.49484	5e-05	0.00413767
ENSMUST00000060484	ENSMUSG00000049037	Clec4a1	chr6:122921847-122934619	17.3703	6.20148	1.48594	0.0001	0.00752154
ENSMUST00000022744	ENSMUSG00000022144	Gdnf	chr15:7811010-7837575	6.13365	2.19357	1.48347	5e-05	0.00413767
ENSMUST00000021209	ENSMUSG00000020848	Doc2b	chr11:75768965-75825241	19.9014	7.16691	1.47345	5e-05	0.00413767
ENSMUST00000054002	ENSMUSG00000053113	Socs3	chr11:117966078-117969186	102.684	36.9921	1.47293	5e-05	0.00413767
ENSMUST00000037360	ENSMUSG00000034226	Rhov	chr2:119269200-119271272	2.65303	0.955832	1.47281	0.00095	0.0458858
ENSMUST00000029140	ENSMUSG00000027611	Procr	chr2:155751116-155755471	2.72451	0.983553	1.46992	0.00045	0.0259452
ENSMUST00000026972	ENSMUSG00000025854	Fam20c	chr5:138754513-138810077	8.27274	2.98744	1.46946	5e-05	0.00413767
ENSMUST00000071812	ENSMUSG00000028068	Iqgap3	chr3:88081970-88121048	1.23546	0.446192	1.46931	0.0005	0.0280447
ENSMUST00000075884	ENSMUSG00000063011	Msln	chr17:25748613-25754327	66.9813	24.2464	1.46599	5e-05	0.00413767
ENSMUST00000068044	ENSMUSG00000022094	Slc39a14	chr14:70303468-70351425	16.4222	5.94769	1.46524	5e-05	0.00413767
ENSMUST00000032240	ENSMUSG00000030144	Clec4d	chr6:123262116-123275265	49.1088	17.8009	1.46403	5e-05	0.00413767
ENSMUST00000029046	ENSMUSG00000027533	Fabp5	chr3:10012547-10016607	202.859	73.6599	1.46153	5e-05	0.00413767
ENSMUST00000114482	ENSMUSG00000026981	Il1rn	chr2:24336852-24351494	21.9557	7.9791	1.4603	5e-05	0.00413767
ENSMUST00000119469	ENSMUSG00000089942	Pira2	chr7:3836811-3845051	3.86844	1.40748	1.45864	0.00065	0.0342624
ENSMUST00000066529	ENSMUSG00000022206	Npr3	chr15:11839895-11905674	48.7657	17.7696	1.45646	5e-05	0.00413767
ENSMUST00000048860	ENSMUSG00000039395	Mreg	chr1:72159441-72212307	4.38759	1.60239	1.4532	5e-05	0.00413767
ENSMUST00000102894	ENSMUSG00000062593	Lilrb4a	chr10:51480678-51486219	30.4665	11.1409	1.45136	5e-05	0.00413767
ENSMUST00000094760	ENSMUSG00000073758	Sh3d21	chr4:126150601-126163491	14.413	5.29606	1.44438	0.00055	0.0301111
ENSMUST00000100301	ENSMUSG00000078816	Prkcg	chr7:3303521-3331099	2.5334	0.931298	1.44376	0.00035	0.0211828
ENSMUST00000046290	ENSMUSG00000033192	Lpcat2	chr8:92853652-92919279	10.116	3.7241	1.44168	0.0003	0.0186561
ENSMUST00000046071	ENSMUSG00000042115	Klhdc8a	chr1:132298625-132307357	5.38405	1.98376	1.44046	5e-05	0.00413767
ENSMUST00000049022	ENSMUSG00000037966	Ninj1	chr13:49187484-49196244	46.3657	17.0842	1.4404	5e-05	0.00413767
ENSMUST00000117291	ENSMUSG00000040675	Mthfd1l	chr10:3973117-4167081	3.35335	1.25064	1.42293	0.0009	0.0440307
ENSMUST00000063278	ENSMUSG00000031980	Agt	chr8:124556533-124569706	3.05035	1.14081	1.41891	0.0008	0.0401414
ENSMUST00000032194	ENSMUSG00000030103	Bhlhe40	chr6:108660628-108666925	47.1347	17.66	1.4163	5e-05	0.00413767
ENSMUST00000086763	ENSMUSG00000004730	Adgre1	chr17:57358685-57483529	20.1723	7.56553	1.41486	5e-05	0.00413767
ENSMUST00000005255	ENSMUSG00000005124	Wisp1	chr15:66891319-66923201	2.64021	0.993007	1.41078	5e-05	0.00413767
ENSMUST00000030834	ENSMUSG00000028978	Nos3	chr5:24364809-24392143	9.62516	3.62804	1.40762	5e-05	0.00413767
ENSMUST00000037491	ENSMUSG00000039109	F13a1	chr13:36867177-37050244	48.1388	18.3816	1.38894	0.0001	0.00752154
ENSMUST00000022663	ENSMUSG00000022074	Tnfrsf10b	chr14:69767471-69784403	6.42537	2.46264	1.38357	5e-05	0.00413767
ENSMUST00000109367	ENSMUSG00000017002	Slpi	chr2:164354069-164389095	70.8732	27.1637	1.38356	5e-05	0.00413767
ENSMUST00000006235	ENSMUSG00000021939	Ctsb	chr14:63122461-63177793	195.847	75.1647	1.3816	0.0005	0.0280447
ENSMUST00000113893	ENSMUSG00000026821	Ralgds	chr2:28513124-28553081	8.34358	3.20692	1.37948	0.0007	0.0362738
ENSMUST00000064068	ENSMUSG00000052270	Fpr2	chr17:17887851-17971677	26.0437	10.0102	1.37946	5e-05	0.00413767
ENSMUST00000052281	ENSMUSG00000043439	E130012A19Rik	chr11:97627388-97629702	9.02611	3.4704	1.379	0.0001	0.00752154
ENSMUST00000116304	ENSMUSG00000038642	Ctss	chr3:95526785-95556403	295.493	113.958	1.37462	0.0003	0.0186561
ENSMUST00000039559	ENSMUSG00000040152	Thbs1	chr2:118111875-118127133	100.548	38.8751	1.37096	5e-05	0.00413767
ENSMUST00000204087	ENSMUSG00000051343	Rab11fip5	chr6:85334961-85374634	6.70782	2.60067	1.36696	0.00015	0.0105044
ENSMUST00000096357	ENSMUSG00000071715	Ncf4	chr15:78244800-78262580	17.397	6.75207	1.36543	5e-05	0.00413767
ENSMUST00000077088	ENSMUSG00000030254	Rad18	chr6:112619849-112696686	5.71815	2.22252	1.36335	0.0003	0.0186561
ENSMUST00000001156	ENSMUSG00000001128	Cfp	chrX:20925453-20931555	20.3315	7.93122	1.3581	5e-05	0.00413767
ENSMUST00000054483	ENSMUSG00000046688	Tifa	chr3:127789804-127798389	8.6005	3.36568	1.35352	0.00035	0.0211828
ENSMUST00000001051	ENSMUSG00000001025	S100a6	chr3:90612881-90614414	392.34	153.832	1.35075	5e-05	0.00413767
ENSMUST00000115068	ENSMUSG00000032122	Slc37a2	chr9:37227584-37255738	2.42201	0.953723	1.34456	0.00075	0.0382387
ENSMUST00000004986	ENSMUSG00000004864	Mapk13	chr17:28769306-28778698	20.38	8.02794	1.34405	5e-05	0.00413767
ENSMUST00000024698	ENSMUSG00000023905	Tnfrsf12a	chr17:23675446-23677449	48.129	19.0354	1.33822	5e-05	0.00413767
ENSMUST00000090559	ENSMUSG00000068742	Cry2	chr2:92403645-92434043	58.6304	23.2572	1.33397	0.0001	0.00752154
ENSMUST00000060174	ENSMUSG00000048779	P2ry6	chr7:100937629-100964391	11.8924	4.72316	1.33221	5e-05	0.00413767
ENSMUST00000102745	ENSMUSG00000021281	Tnfaip2	chr12:111442468-111455018	32.015	12.7279	1.33075	5e-05	0.00413767
ENSMUST00000045173	ENSMUSG00000035493	Tgfbi	chr13:56609602-56639339	98.1187	39.1514	1.32547	5e-05	0.00413767
ENSMUST00000025818	ENSMUSG00000024883	Rin1	chr19:5050807-5057071	2.63992	1.05358	1.3252	0.00015	0.0105044
ENSMUST00000024849	ENSMUSG00000024053	Emilin2	chr17:71252175-71310965	19.7654	7.91683	1.31998	5e-05	0.00413767
ENSMUST00000106908	ENSMUSG00000028525	Pde4b	chr4:102087542-102607259	40.1076	16.0714	1.31938	0.00015	0.0105044
ENSMUST00000032185	ENSMUSG00000030096	Slc6a6	chr6:91684052-91759066	98.3114	39.4357	1.31786	5e-05	0.00413767
ENSMUST00000164044	ENSMUSG00000059498	Fcgr3	chr1:171051174-171064935	72.9908	29.3214	1.31576	5e-05	0.00413767
ENSMUST00000090246	ENSMUSG00000050931	Sgms2	chr3:131318984-131496254	9.47862	3.8211	1.31069	5e-05	0.00413767
ENSMUST00000031741	ENSMUSG00000029727	Cyp3a13	chr5:137892931-137921619	4.94636	2.00154	1.30526	0.00015	0.0105044
ENSMUST00000070639	ENSMUSG00000074417	Gm14548	chr7:3884241-3898120	5.8083	2.35477	1.30253	0.00015	0.0105044
ENSMUST00000025563	ENSMUSG00000024661	Fth1	chr19:9982702-9985092	3741.16	1517.32	1.30197	0.00085	0.0421601
ENSMUST00000098548	ENSMUSG00000019194	Scn1b	chr7:31116523-31127003	5.96065	2.42408	1.29804	0.0009	0.0440307
ENSMUST00000020227	ENSMUSG00000020038	Cry1	chr10:85131699-85185064	20.3811	8.3275	1.29128	5e-05	0.00413767
ENSMUST00000024238	ENSMUSG00000023473	Celsr3	chr9:108826319-108852969	0.800552	0.331177	1.27339	0.0002	0.0133323
ENSMUST00000078778	ENSMUSG00000062593	Lilrb4a	chr10:51491017-51496613	63.0796	26.1435	1.27072	5e-05	0.00413767
ENSMUST00000061328	ENSMUSG00000045314	Sowahb	chr5:93041122-93045022	3.33745	1.38794	1.2658	0.0004	0.0235705
ENSMUST00000031243	ENSMUSG00000029304	Spp1	chr5:104435117-104441050	172.668	72.2311	1.25731	5e-05	0.00413767
ENSMUST00000063062	ENSMUSG00000040809	Chil3	chr3:106147553-106167564	712.337	298.694	1.25389	0.0005	0.0280447
ENSMUST00000019266	ENSMUSG00000019122	Ccl9	chr11:83572918-83578636	19.034	7.98511	1.25319	5e-05	0.00413767
ENSMUST00000053871	ENSMUSG00000046841	Ckap4	chr10:84526304-84534062	34.0958	14.3056	1.25302	5e-05	0.00413767
ENSMUST00000207982	ENSMUSG00000030579	Tyrobp	chr7:30413759-30417582	306.054	128.558	1.25137	5e-05	0.00413767
ENSMUST00000094451	ENSMUSG00000047875	Gpr157	chr4:150087364-150105927	10.56	4.4481	1.24735	5e-05	0.00413767
ENSMUST00000062525	ENSMUSG00000048234	Rnf149	chr1:39547569-39577405	53.9017	22.7819	1.24244	5e-05	0.00413767
ENSMUST00000038404	ENSMUSG00000042417	Ccno	chr13:112987801-112990778	3.30993	1.40191	1.2394	0.00075	0.0382387
ENSMUST00000168621	ENSMUSG00000025314	Ptprj	chr2:90429755-90580647	47.8912	20.4617	1.22684	5e-05	0.00413767
ENSMUST00000120537	ENSMUSG00000053175	Bcl3	chr7:19808461-19822770	28.3014	12.1016	1.22567	5e-05	0.00413767
ENSMUST00000058178	ENSMUSG00000051397	Tacstd2	chr6:67532488-67556204	53.613	22.9292	1.2254	5e-05	0.00413767
ENSMUST00000055619	ENSMUSG00000043099	Hic1	chr11:75164564-75169519	8.44365	3.62325	1.22058	5e-05	0.00413767
ENSMUST00000055159	ENSMUSG00000043157	Arl11	chr14:61309752-61311936	11.5084	4.95081	1.21696	0.0002	0.0133323
ENSMUST00000023101	ENSMUSG00000022464	Slc38a4	chr15:96994822-97055956	38.3805	16.5234	1.21587	0.00025	0.016035
ENSMUST00000058702	ENSMUSG00000054499	Dedd2	chr7:25202839-25220615	23.7954	10.2463	1.21558	5e-05	0.00413767
ENSMUST00000001513	ENSMUSG00000001473	Tubb6	chr18:67390716-67402748	18.0756	7.79641	1.21316	5e-05	0.00413767
ENSMUST00000043378	ENSMUSG00000039886	Tmem120a	chr5:135735484-135744448	16.259	7.06643	1.20218	5e-05	0.00413767
ENSMUST00000062045	ENSMUSG00000051627	Hist1h1e	chr13:23621754-23622502	279.412	121.65	1.19965	5e-05	0.00413767
ENSMUST00000102964	ENSMUSG00000060093	Hist1h4a	chr13:23760691-23761230	81.8343	35.8452	1.19092	5e-05	0.00413767
ENSMUST00000038406	ENSMUSG00000029762	Akr1b8	chr6:34354118-34368463	24.7462	10.8567	1.18863	5e-05	0.00413767
ENSMUST00000030398	ENSMUSG00000028645	Slc2a1	chr4:119108710-119138801	21.1506	9.28716	1.18739	5e-05	0.00413767
ENSMUST00000041357	ENSMUSG00000037095	Lrg1	chr17:56119679-56121946	128.856	56.5849	1.18727	5e-05	0.00413767
ENSMUST00000007012	ENSMUSG00000006818	Sod2	chr17:13007838-13018119	64.3229	28.3262	1.1832	5e-05	0.00413767
ENSMUST00000033941	ENSMUSG00000031538	Plat	chr8:22757746-22782844	58.1327	25.6155	1.18233	5e-05	0.00413767
ENSMUST00000029766	ENSMUSG00000028121	Bcar3	chr3:122419777-122530191	53.1071	23.4781	1.17759	0.0001	0.00752154
ENSMUST00000052631	ENSMUSG00000042821	Snai1	chr2:167538194-167542814	12.2975	5.44468	1.17544	0.00015	0.0105044
ENSMUST00000032330	ENSMUSG00000030208	Emp1	chr6:135362544-135383173	150.306	66.6954	1.17225	5e-05	0.00413767
ENSMUST00000033056	ENSMUSG00000030793	Pycard	chr7:127989707-127993867	7.90947	3.511	1.1717	0.0001	0.00752154
ENSMUST00000096106	ENSMUSG00000079620	Muc4	chr16:32735885-32797435	7.94582	3.52961	1.17069	5e-05	0.00413767
ENSMUST00000020308	ENSMUSG00000020108	Ddit4	chr10:59949674-59951770	120.66	53.7238	1.16731	0.0001	0.00752154
ENSMUST00000021726	ENSMUSG00000011148	Adssl1	chr12:112620044-112641354	24.0173	10.7202	1.16374	5e-05	0.00413767
ENSMUST00000118875	ENSMUSG00000057666	Gapdh	chr6:125161852-125166467	173.971	77.7299	1.16231	5e-05	0.00413767
ENSMUST00000024811	ENSMUSG00000024014	Pim1	chr17:29461895-29496111	58.0644	26.0626	1.15567	5e-05	0.00413767
ENSMUST00000077925	ENSMUSG00000020099	Unc5b	chr10:60762609-60831581	7.996	3.59731	1.15236	5e-05	0.00413767
ENSMUST00000027012	ENSMUSG00000033538	Casp4	chr9:5308827-5336783	16.1912	7.29229	1.15076	5e-05	0.00413767
ENSMUST00000033414	ENSMUSG00000031089	Slc6a14	chrX:21714895-21742355	82.271	37.1386	1.14747	5e-05	0.00413767
ENSMUST00000026170	ENSMUSG00000025171	Ubtd1	chr19:41981762-42034641	12.8255	5.7943	1.14631	0.0005	0.0280447
ENSMUST00000057311	ENSMUSG00000047281	Sfn	chr4:133600555-133602168	25.9823	11.7773	1.14152	5e-05	0.00413767
ENSMUST00000020145	ENSMUSG00000019970	Sgk1	chr10:21882183-21999903	168.686	76.6276	1.1384	5e-05	0.00413767
ENSMUST00000048782	ENSMUSG00000042265	Trem1	chr17:48232767-48246924	11.5217	5.23578	1.13788	0.0001	0.00752154
ENSMUST00000169082	ENSMUSG00000044217	Aqp5	chr15:99590848-99594829	194.483	88.6392	1.13363	0.0001	0.00752154
ENSMUST00000024854	ENSMUSG00000024059	Clip4	chr17:71781946-71858351	20.3135	9.26149	1.13312	5e-05	0.00413767
ENSMUST00000029564	ENSMUSG00000027952	Pmvk	chr3:89454540-89469013	100.183	45.7983	1.12927	0.0002	0.0133323
ENSMUST00000029623	ENSMUSG00000027995	Tlr2	chr3:83836271-83841767	23.514	10.7496	1.12923	5e-05	0.00413767
ENSMUST00000117507	ENSMUSG00000028108	Ecm1	chr3:95734146-95739569	78.2686	35.8384	1.12693	0.0004	0.0235705
ENSMUST00000071130	ENSMUSG00000060063	Alox5ap	chr5:149264766-149288153	75.8327	34.7451	1.12601	5e-05	0.00413767
ENSMUST00000038169	ENSMUSG00000033307	Mif	chr10:75859352-75860250	93.5717	43.0845	1.1189	5e-05	0.00413767
ENSMUST00000023143	ENSMUSG00000022500	Litaf	chr16:10959274-11066157	69.4217	31.9808	1.11818	5e-05	0.00413767
ENSMUST00000096350	ENSMUSG00000042622	Maff	chr15:79347540-79359072	31.8538	14.6995	1.1157	0.0008	0.0401414
ENSMUST00000165147	ENSMUSG00000066108	Muc5b	chr7:141839069-141873084	29.6752	13.7791	1.10678	0.0001	0.00752154
ENSMUST00000010451	ENSMUSG00000010307	Tmem86a	chr7:47050600-47054777	13.8247	6.4228	1.10597	0.00025	0.016035
ENSMUST00000034915	ENSMUSG00000032359	Ctsh	chr9:90054151-90076089	397.238	185.662	1.09733	5e-05	0.00413767
ENSMUST00000052602	ENSMUSG00000050390	C77080	chr4:129189759-129261404	35.3334	16.6058	1.08935	5e-05	0.00413767
ENSMUST00000024894	ENSMUSG00000024087	Cyp1b1	chr17:79706952-79715041	8.25841	3.8838	1.0884	0.00035	0.0211828
ENSMUST00000057243	ENSMUSG00000048572	Tmem252	chr19:24674007-24679661	19.1425	9.02431	1.08489	5e-05	0.00413767
ENSMUST00000035077	ENSMUSG00000032496	Ltf	chr9:111019270-111042767	37.5578	17.7132	1.08429	5e-05	0.00413767
ENSMUST00000030381	ENSMUSG00000028633	Ctps	chr4:120539867-120570276	24.565	11.6111	1.0811	5e-05	0.00413767
ENSMUST00000057921	ENSMUSG00000062421	Arf2	chr11:103966738-103985337	40.6579	19.2934	1.07543	5e-05	0.00413767
ENSMUST00000005651	ENSMUSG00000005514	Por	chr5:135670032-135735326	231.97	110.304	1.07245	0.001	0.0477064
ENSMUST00000084828	ENSMUSG00000042029	Ncapg2	chr12:116405401-116463531	3.72959	1.77435	1.07172	0.0006	0.0322352
ENSMUST00000078451	ENSMUSG00000058818	Pirb	chr7:3711408-3720382	26.4	12.6093	1.06606	0.00015	0.0105044
ENSMUST00000024011	ENSMUSG00000023243	Kcnk5	chr14:20140057-20181782	4.70548	2.25258	1.06276	0.001	0.0477064
ENSMUST00000078825	ENSMUSG00000059089	Fcgr4	chr1:171018919-171029761	19.4882	9.33623	1.06169	0.00045	0.0259452
ENSMUST00000021283	ENSMUSG00000020901	Pik3r5	chr11:68432120-68497849	11.8126	5.66196	1.06095	0.0002	0.0133323
ENSMUST00000040914	ENSMUSG00000036181	Hist1h1c	chr13:23738807-23740367	229.996	110.318	1.05994	5e-05	0.00413767
ENSMUST00000033001	ENSMUSG00000030747	Dgat2	chr7:99153657-99182719	13.6723	6.57885	1.05535	5e-05	0.00413767
ENSMUST00000102840	ENSMUSG00000076441	Ass1	chr2:31470206-31520672	19.4906	9.39291	1.05313	0.0001	0.00752154
ENSMUST00000031017	ENSMUSG00000029135	Fosl2	chr5:32135800-32157842	84.2566	40.7645	1.04748	0.00025	0.016035
ENSMUST00000034834	ENSMUSG00000032294	Pkm	chr9:59656367-59679375	215.512	104.344	1.04642	0.00015	0.0105044
ENSMUST00000111275	ENSMUSG00000015950	Ncf1	chr5:134220259-134229625	33.4571	16.2039	1.04598	0.0006	0.0322352
ENSMUST00000021933	ENSMUSG00000021477	Ctsl	chr13:64363213-64370306	227.098	110.321	1.04161	5e-05	0.00413767
ENSMUST00000051209	ENSMUSG00000002265	Peg3	chr7:6703891-6730421	12.0532	5.85852	1.0408	5e-05	0.00413767
ENSMUST00000049248	ENSMUSG00000032688	Malt1	chr18:65430962-65478823	16.1329	7.84359	1.04042	5e-05	0.00413767
ENSMUST00000000642	ENSMUSG00000000628	Hk2	chr6:82725024-82774454	22.0341	10.7267	1.03852	5e-05	0.00413767
ENSMUST00000071233	ENSMUSG00000058881	Zfp516	chr18:82910878-83005314	16.6533	8.12817	1.03481	0.00015	0.0105044
ENSMUST00000109838	ENSMUSG00000055254	Ntrk2	chr13:58806595-59133970	8.7267	4.27136	1.03074	5e-05	0.00413767
ENSMUST00000058914	ENSMUSG00000043091	Tuba1c	chr15:99029890-99038105	27.8512	13.6421	1.02967	5e-05	0.00413767
ENSMUST00000078222	ENSMUSG00000000308	Ckmt1	chr2:121357713-121380940	13.2745	6.50597	1.02882	0.0006	0.0322352
ENSMUST00000033004	ENSMUSG00000030748	Il4ra	chr7:125552119-125579474	83.6113	41.007	1.02783	5e-05	0.00413767
ENSMUST00000021077	ENSMUSG00000020733	Slc9a3r1	chr11:115163340-115181181	52.2402	25.7257	1.02195	5e-05	0.00413767
ENSMUST00000061986	ENSMUSG00000044813	Shb	chr4:45423277-45532470	21.3029	10.497	1.02107	5e-05	0.00413767
ENSMUST00000152420	ENSMUSG00000074063	Osgin1	chr8:119434123-119446256	18.2744	9.00485	1.02105	0.0002	0.0133323
ENSMUST00000038753	ENSMUSG00000040711	Sh3pxd2b	chr11:32347819-32428173	16.7184	8.3215	1.00653	5e-05	0.00413767
ENSMUST00000019064	ENSMUSG00000018920	Cxcl16	chr11:70453982-70466202	32.3911	16.1437	1.00463	0.00045	0.0259452
ENSMUST00000022791	ENSMUSG00000022184	Fbxo4	chr15:3965444-3979573	22.8229	11.3789	1.00412	0.0002	0.0133323
ENSMUST00000114458	ENSMUSG00000035356	Nfkbiz	chr16:55811374-55838899	30.0473	15.0101	1.00131	0.0001	0.00752154

## Sheet: 7d Vs Sham
Identification of DETs in the comparison between sham and VILI group on day 7
Transcript ID	Gene ID	Gene symbol	Gene location	VILI 7d FPKM	Ctrl FPKM	Log2 (Fold Change)	p-value	q-value
ENSMUST00000029632	ENSMUSG00000028003	Lrat	chr3:82892578-82903973	3.14585	40.6609	-3.69212	5e-05	0.00413767
ENSMUST00000216226	ENSMUSG00000043383	Olfr1342	chr4:118687485-118692756	0.0953956	1.2095	-3.66434	0.0001	0.00752154
ENSMUST00000053949	ENSMUSG00000044461	Shisa2	chr14:59625280-59631658	0.343855	4.10267	-3.57669	5e-05	0.00413767
ENSMUST00000035020	ENSMUSG00000032446	Eomes	chr9:118478211-118486132	0.06164	0.619907	-3.33011	0.0008	0.0401414
ENSMUST00000042352	ENSMUSG00000037492	Zmat4	chr8:23636018-24063105	0.10993	0.98897	-3.16934	5e-05	0.00413767
ENSMUST00000062562	ENSMUSG00000044309	Apol7c	chr15:77524866-77533315	0.146853	1.30379	-3.15027	0.00045	0.0259452
ENSMUST00000059449	ENSMUSG00000050097	Ces2b	chr8:104831571-104840093	0.127573	1.09561	-3.10234	5e-05	0.00413767
ENSMUST00000082321	ENSMUSG00000026616	Cr2	chr1:195131617-195186352	0.17235	1.46983	-3.09224	0.0001	0.00752154
ENSMUST00000046383	ENSMUSG00000039304	Tnfsf10	chr3:27317027-27342427	6.94058	58.8183	-3.08314	5e-05	0.00413767
ENSMUST00000030782	ENSMUSG00000028940	Hes2	chr4:152158866-152162469	0.209006	1.69356	-3.01844	5e-05	0.00413767
ENSMUST00000059667	ENSMUSG00000046093	Hpcal4	chr4:123183226-123194701	0.195348	1.53396	-2.97314	0.00015	0.0105044
ENSMUST00000169159	ENSMUSG00000024673	Ms4a1	chr19:11249674-11266241	0.98426	7.72482	-2.97239	5e-05	0.00413767
ENSMUST00000160424	ENSMUSG00000022416	Cacna1i	chr15:80287237-80398279	0.0792152	0.617431	-2.96243	5e-05	0.00413767
ENSMUST00000034865	ENSMUSG00000032315	Cyp1a1	chr9:57687927-57703824	6.07404	43.0698	-2.82595	5e-05	0.00413767
ENSMUST00000182350	ENSMUSG00000060509	Xcr1	chr9:123852314-123862029	0.146524	1.02535	-2.80691	5e-05	0.00413767
ENSMUST00000032127	ENSMUSG00000030048	Gkn3	chr6:87383255-87388935	0.744101	4.95898	-2.73647	5e-05	0.00413767
ENSMUST00000085876	ENSMUSG00000066677	Ifi208	chr1:173673679-173698392	2.15912	14.0222	-2.6992	5e-05	0.00413767
ENSMUST00000150649	ENSMUSG00000073491	Ifi213	chr1:173567072-173599274	1.06956	6.90856	-2.69137	0.00105	0.0494336
ENSMUST00000073935	ENSMUSG00000046182	Gsg1l	chr7:125878419-126082411	0.255198	1.62226	-2.66832	5e-05	0.00413767
ENSMUST00000032968	ENSMUSG00000030724	Cd19	chr7:126408450-126414889	0.81607	5.13842	-2.65456	5e-05	0.00413767
ENSMUST00000143662	ENSMUSG00000043243	Fam129c	chr8:71597647-71607936	0.194926	1.17641	-2.5934	0.00085	0.0421601
ENSMUST00000112063	ENSMUSG00000030165	Klrd1	chr6:129591781-129598775	0.868327	5.14901	-2.56798	5e-05	0.00413767
ENSMUST00000108790	ENSMUSG00000043448	Gjc2	chr11:59175567-59183213	0.138649	0.807174	-2.54145	0.00055	0.0301111
ENSMUST00000031003	ENSMUSG00000029120	Ppp2r2c	chr5:36868512-36955078	0.231501	1.34345	-2.53685	5e-05	0.00413767
ENSMUST00000097462	ENSMUSG00000073491	Ifi213	chr1:173567072-173599274	0.437025	2.5223	-2.52895	0.001	0.0477064
ENSMUST00000081438	ENSMUSG00000031489	Adrb3	chr8:27225775-27240332	0.46549	2.68281	-2.52692	0.0002	0.0133323
ENSMUST00000111026	ENSMUSG00000041644	Slc5a12	chr2:110597297-110647779	0.526895	3.01416	-2.51617	5e-05	0.00413767
ENSMUST00000079063	ENSMUSG00000063632	Sox11	chr12:27334263-27342574	2.24708	12.8346	-2.51391	5e-05	0.00413767
ENSMUST00000052700	ENSMUSG00000044453	Ffar1	chr7:30857389-30861564	0.0972575	0.553291	-2.50816	0.00105	0.0494336
ENSMUST00000050780	ENSMUSG00000051262	Nat8f3	chr6:85760648-85765744	0.540283	3.07255	-2.50765	5e-05	0.00413767
ENSMUST00000057428	ENSMUSG00000044951	Mylk4	chr13:32700826-32781779	0.122686	0.686645	-2.4846	5e-05	0.00413767
ENSMUST00000040250	ENSMUSG00000039783	Kmo	chr1:175631995-175662116	0.482958	2.69249	-2.47897	5e-05	0.00413767
ENSMUST00000025311	ENSMUSG00000024440	Pcdh12	chr18:38267091-38284402	1.91599	10.3077	-2.42756	5e-05	0.00413767
ENSMUST00000105325	ENSMUSG00000034881	Tbxa2r	chr10:81328731-81335171	1.16026	6.18983	-2.41545	5e-05	0.00413767
ENSMUST00000109514	ENSMUSG00000000861	Bcl11a	chr11:24078055-24174123	0.275432	1.45121	-2.39749	5e-05	0.00413767
ENSMUST00000005592	ENSMUSG00000030468	Siglecg	chr7:43408203-43418358	0.645208	3.38735	-2.39232	5e-05	0.00413767
ENSMUST00000043011	ENSMUSG00000038233	Fam198a	chr9:121950987-121980209	0.635277	3.31375	-2.383	0.00035	0.0211828
ENSMUST00000095342	ENSMUSG00000041538	H2-Ob	chr17:34238902-34245907	1.73204	8.91112	-2.36313	5e-05	0.00413767
ENSMUST00000038829	ENSMUSG00000042474	Fcmr	chr1:130865668-130880791	1.62235	8.23699	-2.34404	5e-05	0.00413767
ENSMUST00000068307	ENSMUSG00000054978	Kbtbd13	chr9:65388683-65391652	0.196763	0.998495	-2.34329	0.0001	0.00752154
ENSMUST00000078386	ENSMUSG00000045871	Slitrk6	chr14:110748577-110755149	0.361705	1.83498	-2.34288	5e-05	0.00413767
ENSMUST00000166505	ENSMUSG00000090919	Pabpc4l	chr3:46442196-46448219	0.163991	0.818348	-2.3191	0.0008	0.0401414
ENSMUST00000040404	ENSMUSG00000034634	Ly6d	chr15:74762055-74763620	2.11089	10.5088	-2.31568	5e-05	0.00413767
ENSMUST00000161954	ENSMUSG00000049690	Nckap5	chr1:125913619-126830799	7.6338	37.3808	-2.29183	5e-05	0.00413767
ENSMUST00000049941	ENSMUSG00000049281	Scn3b	chr9:40269216-40291618	6.72855	32.7463	-2.28297	5e-05	0.00413767
ENSMUST00000023897	ENSMUSG00000023132	Gzma	chr13:113093824-113100979	3.87159	18.7713	-2.27753	5e-05	0.00413767
ENSMUST00000210477	ENSMUSG00000035456	Prdm8	chr5:98167197-98188991	0.579608	2.80151	-2.27305	0.0001	0.00752154
ENSMUST00000105993	ENSMUSG00000078532	Nkain1	chr4:130531617-130574173	0.913438	4.36683	-2.25721	0.0001	0.00752154
ENSMUST00000164936	ENSMUSG00000090659	Zfp493	chr13:67779753-67792512	0.245203	1.16678	-2.25048	0.0001	0.00752154
ENSMUST00000003469	ENSMUSG00000003379	Cd79a	chr7:24897380-24902197	3.83981	18.2096	-2.2456	5e-05	0.00413767
ENSMUST00000194012	ENSMUSG00000024440	Pcdh12	chr18:38267091-38284402	2.32232	10.9095	-2.23195	5e-05	0.00413767
ENSMUST00000014174	ENSMUSG00000014030	Pax5	chr4:44524756-44710487	0.613024	2.86629	-2.22517	5e-05	0.00413767
ENSMUST00000095923	ENSMUSG00000021880	Rnase6	chr14:51129067-51131122	1.99797	9.31961	-2.22173	5e-05	0.00413767
ENSMUST00000029188	ENSMUSG00000027656	Wisp2	chr2:163820888-163833146	6.02587	28.0946	-2.22105	5e-05	0.00413767
ENSMUST00000110521	ENSMUSG00000079071	Gm14085	chr2:122484940-122528040	0.120423	0.560753	-2.21926	0.001	0.0477064
ENSMUST00000102790	ENSMUSG00000035407	Kank4	chr4:98754897-98817537	1.58136	7.35736	-2.21803	5e-05	0.00413767
ENSMUST00000100962	ENSMUSG00000079363	Gbp4	chr5:105014152-105139586	3.19601	14.843	-2.21544	5e-05	0.00413767
ENSMUST00000122088	ENSMUSG00000045087	S1pr5	chr9:21242911-21248443	0.366482	1.69765	-2.21173	5e-05	0.00413767
ENSMUST00000062765	ENSMUSG00000030443	Zfp583	chr7:6315659-6331285	0.356247	1.64842	-2.21013	0.00065	0.0342624
ENSMUST00000023732	ENSMUSG00000022996	Wnt10b	chr15:98771752-98778150	1.31897	6.10159	-2.20977	5e-05	0.00413767
ENSMUST00000026315	ENSMUSG00000025279	Dnase1l3	chr14:7964532-7994573	0.112884	0.518637	-2.19988	0.0007	0.0362738
ENSMUST00000043884	ENSMUSG00000036295	Lrrn3	chr12:41024089-41955588	1.82668	8.30598	-2.18493	5e-05	0.00413767
ENSMUST00000051809	ENSMUSG00000046916	Myct1	chr10:5593774-5606904	6.16684	27.4671	-2.1551	5e-05	0.00413767
ENSMUST00000090025	ENSMUSG00000068522	Aard	chr15:52040106-52045722	2.3947	10.6653	-2.15502	5e-05	0.00413767
ENSMUST00000164192	ENSMUSG00000071042	Rasgrp3	chr17:75435904-75529043	4.88844	21.5325	-2.13907	5e-05	0.00413767
ENSMUST00000029671	ENSMUSG00000028037	Ifi44	chr3:151730921-151749960	1.17531	5.14356	-2.12972	5e-05	0.00413767
ENSMUST00000112027	ENSMUSG00000057606	Colq	chr14:31523081-31591343	0.840402	3.66197	-2.12347	0.0001	0.00752154
ENSMUST00000039026	ENSMUSG00000037010	Apln	chrX:48025145-48034853	5.50572	23.9279	-2.11969	5e-05	0.00413767
ENSMUST00000052072	ENSMUSG00000043664	Tmem221	chr8:71554237-71558871	1.37161	5.95268	-2.11767	5e-05	0.00413767
ENSMUST00000025211	ENSMUSG00000024353	Mzb1	chr18:35647265-35649367	0.853112	3.67759	-2.10795	0.0002	0.0133323
ENSMUST00000025004	ENSMUSG00000032915	Adgre4	chr17:55749983-55853662	1.00065	4.29926	-2.10315	5e-05	0.00413767
ENSMUST00000189181	ENSMUSG00000031870	Pgr	chr9:8899832-8968611	0.439656	1.87947	-2.09588	5e-05	0.00413767
ENSMUST00000066049	ENSMUSG00000049420	Tmem200a	chr10:25991185-26079447	0.788472	3.3391	-2.08233	5e-05	0.00413767
ENSMUST00000020949	ENSMUSG00000020623	Map2k6	chr11:110399121-110525522	1.00752	4.25971	-2.07994	5e-05	0.00413767
ENSMUST00000087033	ENSMUSG00000067149	Jchain	chr5:88520511-88527891	4.57586	19.3041	-2.0768	5e-05	0.00413767
ENSMUST00000031239	ENSMUSG00000029299	Abcg3	chr5:104935056-104982718	0.684546	2.85036	-2.05792	5e-05	0.00413767
ENSMUST00000057019	ENSMUSG00000044338	Aplnr	chr2:85136224-85139923	7.27041	30.2628	-2.05744	5e-05	0.00413767
ENSMUST00000049184	ENSMUSG00000034911	Ushbp1	chr8:71385368-71395785	7.83246	32.1516	-2.03735	5e-05	0.00413767
ENSMUST00000205228	ENSMUSG00000063415	Cyp26b1	chr6:84571413-84593908	2.57885	10.4811	-2.023	5e-05	0.00413767
ENSMUST00000031238	ENSMUSG00000029298	Gbp9	chr5:105014152-105139586	5.72638	23.2229	-2.01985	5e-05	0.00413767
ENSMUST00000168630	ENSMUSG00000063626	Unc5d	chr8:28646716-29219636	0.140099	0.567561	-2.01833	0.0005	0.0280447
ENSMUST00000120004	ENSMUSG00000057093	Zfp607b	chr7:27689339-27706484	0.169908	0.678933	-1.99852	0.0005	0.0280447
ENSMUST00000089161	ENSMUSG00000068105	Tnfrsf13c	chr15:82221743-82224339	0.461876	1.8429	-1.9964	0.00065	0.0342624
ENSMUST00000182627	ENSMUSG00000038094	Atp13a4	chr16:29396027-29544864	0.513139	2.04386	-1.99388	5e-05	0.00413767
ENSMUST00000100069	ENSMUSG00000057182	Scn3a	chr2:65457117-65567627	1.74683	6.86696	-1.97493	5e-05	0.00413767
ENSMUST00000160565	ENSMUSG00000037849	Ifi206	chr1:173468484-173491041	1.19086	4.64781	-1.96455	5e-05	0.00413767
ENSMUST00000035351	ENSMUSG00000041479	Syt15	chr14:34220045-34230421	1.02718	3.98811	-1.95701	5e-05	0.00413767
ENSMUST00000099449	ENSMUSG00000074867	Zfp808	chr13:62129915-62173419	0.71427	2.77131	-1.95603	5e-05	0.00413767
ENSMUST00000041982	ENSMUSG00000037548	H2-DMb2	chr17:34145270-34151553	2.55936	9.9287	-1.95582	5e-05	0.00413767
ENSMUST00000069292	ENSMUSG00000030145	Zfp248	chr6:118427318-118455528	0.40776	1.57946	-1.95364	0.00025	0.016035
ENSMUST00000044602	ENSMUSG00000057074	Ces1g	chr8:93302368-93337308	1.74307	6.67374	-1.93686	5e-05	0.00413767
ENSMUST00000029670	ENSMUSG00000028036	Ptgfr	chr3:151796501-151837630	1.5475	5.89938	-1.93062	5e-05	0.00413767
ENSMUST00000062246	ENSMUSG00000050395	Tnfsf15	chr4:63727083-63745113	0.470227	1.78988	-1.92844	5e-05	0.00413767
ENSMUST00000066728	ENSMUSG00000053965	Pde5a	chr3:122728946-122859374	15.3757	58.4641	-1.9269	5e-05	0.00413767
ENSMUST00000050385	ENSMUSG00000043932	Klri2	chr6:129729040-129740484	0.199816	0.757494	-1.92256	0.0009	0.0440307
ENSMUST00000034178	ENSMUSG00000031725	Ces1f	chr8:93256235-93279747	1.92047	7.25622	-1.91775	5e-05	0.00413767
ENSMUST00000014597	ENSMUSG00000014453	Blk	chr14:63372836-63417187	0.913357	3.38386	-1.88942	5e-05	0.00413767
ENSMUST00000051039	ENSMUSG00000051705	Senp8	chr9:59734258-59750649	0.44272	1.63766	-1.88717	0.0003	0.0186561
ENSMUST00000036019	ENSMUSG00000034687	Fras1	chr5:96373954-96784728	0.694526	2.55259	-1.87786	5e-05	0.00413767
ENSMUST00000065248	ENSMUSG00000053044	Cd8b1	chr6:71322787-71337494	1.09126	3.94827	-1.85522	5e-05	0.00413767
ENSMUST00000029625	ENSMUSG00000027996	Sfrp2	chr3:83766320-83789956	1.70584	6.16956	-1.85468	5e-05	0.00413767
ENSMUST00000032132	ENSMUSG00000068263	Efcc1	chr6:87729963-87755908	1.1585	4.18279	-1.85221	5e-05	0.00413767
ENSMUST00000039390	ENSMUSG00000035606	Ky	chr9:102505749-102546239	0.164804	0.590092	-1.84018	0.0002	0.0133323
ENSMUST00000056071	ENSMUSG00000043263	Ifi209	chr1:173630916-173647928	2.26392	8.08016	-1.83556	5e-05	0.00413767
ENSMUST00000001484	ENSMUSG00000001444	Tbx21	chr11:97098070-97115331	0.319209	1.13174	-1.82597	0.0008	0.0401414
ENSMUST00000091481	ENSMUSG00000069184	Zfp72	chr13:74371425-74376566	0.917525	3.2506	-1.82489	0.0002	0.0133323
ENSMUST00000043336	ENSMUSG00000040710	St8sia4	chr1:95587681-95667571	7.09089	25.0477	-1.82064	5e-05	0.00413767
ENSMUST00000127748	ENSMUSG00000043496	Tril	chr6:53815467-53820830	2.71162	9.54871	-1.81615	5e-05	0.00413767
ENSMUST00000070518	ENSMUSG00000004612	Nkg7	chr7:43437072-43438249	1.96911	6.87618	-1.80407	0.0005	0.0280447
ENSMUST00000098503	ENSMUSG00000074158	Zfp976	chr7:42612503-42642547	1.42046	4.96017	-1.80403	0.00085	0.0421601
ENSMUST00000204146	ENSMUSG00000063415	Cyp26b1	chr6:84571413-84593908	2.18541	7.55477	-1.78948	5e-05	0.00413767
ENSMUST00000074829	ENSMUSG00000062545	Tlr12	chr4:128615442-128618619	0.378524	1.3072	-1.78802	0.0006	0.0322352
ENSMUST00000046322	ENSMUSG00000038421	Fcrla	chr1:170917575-170927583	0.935295	3.2132	-1.78052	0.00035	0.0211828
ENSMUST00000166121	ENSMUSG00000091649	Phf11b	chr14:59320963-59341351	1.33693	4.59043	-1.7797	5e-05	0.00413767
ENSMUST00000171088	ENSMUSG00000032841	Prr5l	chr2:101714284-101883014	2.37882	8.15827	-1.77802	5e-05	0.00413767
ENSMUST00000105590	ENSMUSG00000019768	Esr1	chr10:4611988-5005614	0.437873	1.49512	-1.77168	5e-05	0.00413767
ENSMUST00000006749	ENSMUSG00000006574	Slc4a1	chr11:102348823-102365280	0.406204	1.382	-1.76648	0.0006	0.0322352
ENSMUST00000201047	ENSMUSG00000091183	Gm5141	chr13:62772199-62785808	0.815035	2.77091	-1.76542	0.00015	0.0105044
ENSMUST00000090601	ENSMUSG00000000416	Cttnbp2	chr6:18366564-18514821	0.588218	1.99837	-1.7644	0.00065	0.0342624
ENSMUST00000103141	ENSMUSG00000018168	Ikzf3	chr11:98464901-98545800	2.20694	7.48113	-1.76121	5e-05	0.00413767
ENSMUST00000029076	ENSMUSG00000027559	Car3	chr3:14863537-14872523	10.2206	34.3182	-1.74749	5e-05	0.00413767
ENSMUST00000028403	ENSMUSG00000027015	Cybrd1	chr2:71117922-71142926	2.07888	6.95728	-1.74272	5e-05	0.00413767
ENSMUST00000034911	ENSMUSG00000032357	Tinag	chr9:76951692-77045794	2.22229	7.30955	-1.71774	5e-05	0.00413767
ENSMUST00000035419	ENSMUSG00000037202	Prf1	chr10:61297835-61304263	0.686483	2.25335	-1.71478	0.0002	0.0133323
ENSMUST00000109255	ENSMUSG00000036158	Prickle1	chr15:93499113-93595891	6.85415	22.456	-1.71205	5e-05	0.00413767
ENSMUST00000110391	ENSMUSG00000016756	Cmah	chr13:24327419-24477285	1.62973	5.3374	-1.7115	5e-05	0.00413767
ENSMUST00000062149	ENSMUSG00000020642	Rnf144a	chr12:26306796-26415256	6.91264	22.5413	-1.70526	5e-05	0.00413767
ENSMUST00000111879	ENSMUSG00000032500	Dclk3	chr9:111439080-111489118	0.440373	1.42841	-1.69761	0.00015	0.0105044
ENSMUST00000026890	ENSMUSG00000025784	Clec3b	chr9:123150945-123157432	28.6179	92.5921	-1.69397	5e-05	0.00413767
ENSMUST00000005452	ENSMUSG00000005320	Fgfr4	chr13:55152639-55168759	2.54346	8.22165	-1.69263	5e-05	0.00413767
ENSMUST00000076249	ENSMUSG00000062488	Ifit3b	chr19:34607969-34613401	4.58308	14.8123	-1.6924	5e-05	0.00413767
ENSMUST00000057679	ENSMUSG00000046491	C1qtnf2	chr11:43474275-43491525	5.02125	16.14	-1.68452	5e-05	0.00413767
ENSMUST00000108995	ENSMUSG00000089951	Gm14435	chr2:176423593-176435761	3.25318	10.4231	-1.67987	0.00015	0.0105044
ENSMUST00000108671	ENSMUSG00000052921	Arhgef15	chr11:68943154-68957480	7.33277	23.3424	-1.67052	5e-05	0.00413767
ENSMUST00000021119	ENSMUSG00000020774	Aspa	chr11:73304991-73329596	1.30637	4.15128	-1.668	0.0004	0.0235705
ENSMUST00000197146	ENSMUSG00000005583	Mef2c	chr13:83504033-83667080	2.15264	6.8274	-1.66523	0.0004	0.0235705
ENSMUST00000051389	ENSMUSG00000030554	Synm	chr7:67730159-67759742	2.85942	9.03965	-1.66054	0.0006	0.0322352
ENSMUST00000170651	ENSMUSG00000033826	Dnah8	chr17:30622440-30875264	0.359524	1.13502	-1.65856	5e-05	0.00413767
ENSMUST00000105082	ENSMUSG00000041757	Plekha6	chr1:133164209-133303435	2.60152	8.20433	-1.65703	5e-05	0.00413767
ENSMUST00000085786	ENSMUSG00000036526	Card11	chr5:140872989-141000582	2.19308	6.88534	-1.65057	5e-05	0.00413767
ENSMUST00000073312	ENSMUSG00000067928	Zfp760	chr17:21707740-21725636	2.60618	8.18021	-1.6502	5e-05	0.00413767
ENSMUST00000022699	ENSMUSG00000022103	Gfra2	chr14:70890129-70979838	2.7039	8.47103	-1.64749	5e-05	0.00413767
ENSMUST00000114574	ENSMUSG00000024027	Glp1r	chr17:30901866-30936510	14.149	44.2701	-1.64563	5e-05	0.00413767
ENSMUST00000020220	ENSMUSG00000020032	Nuak1	chr10:84370904-84440597	3.57393	11.1627	-1.64311	5e-05	0.00413767
ENSMUST00000049787	ENSMUSG00000043110	Lrrn4	chr2:132868304-132880891	2.22689	6.95177	-1.64235	5e-05	0.00413767
ENSMUST00000035258	ENSMUSG00000056290	Ms4a4b	chr19:11443572-11463549	4.86409	15.1202	-1.63623	5e-05	0.00413767
ENSMUST00000025472	ENSMUSG00000024579	Pcyox1l	chr18:61696836-61707635	1.2743	3.9523	-1.63298	0.0001	0.00752154
ENSMUST00000143203	ENSMUSG00000020546	Stxbp4	chr11:90476491-90638084	1.08975	3.33649	-1.61433	5e-05	0.00413767
ENSMUST00000032879	ENSMUSG00000030643	Rab30	chr7:92741602-92844535	0.306767	0.938375	-1.61302	0.00015	0.0105044
ENSMUST00000044188	ENSMUSG00000037358	4930578C19Rik	chrX:18418426-18461371	1.32915	4.05211	-1.60817	0.00055	0.0301111
ENSMUST00000062215	ENSMUSG00000047880	Cxcr5	chr9:44511786-44561877	0.908502	2.75443	-1.60019	0.0001	0.00752154
ENSMUST00000090070	ENSMUSG00000054435	Gimap4	chr6:48684548-48692060	21.4304	64.5328	-1.59037	5e-05	0.00413767
ENSMUST00000135808	ENSMUSG00000063698	Sfxn4	chr19:60838747-60861479	1.38011	4.13151	-1.58189	0.00035	0.0211828
ENSMUST00000167143	ENSMUSG00000040592	Cd79b	chr11:106311340-106314762	5.50311	16.4222	-1.57733	5e-05	0.00413767
ENSMUST00000189556	ENSMUSG00000040710	St8sia4	chr1:95587681-95667571	1.5191	4.52758	-1.57553	0.00095	0.0458858
ENSMUST00000074262	ENSMUSG00000059588	Calcrl	chr2:84330625-84425411	103.451	306.972	-1.56916	5e-05	0.00413767
ENSMUST00000065496	ENSMUSG00000053199	Arhgap20	chr9:51765351-51853856	2.37323	6.99398	-1.55926	5e-05	0.00413767
ENSMUST00000035938	ENSMUSG00000035042	Ccl5	chr11:83525777-83530518	12.5977	36.9877	-1.55389	5e-05	0.00413767
ENSMUST00000040500	ENSMUSG00000036095	Dgkb	chr12:37880704-38633410	0.457553	1.3414	-1.55173	5e-05	0.00413767
ENSMUST00000028384	ENSMUSG00000027001	Dusp19	chr2:80617044-80631661	1.4728	4.31717	-1.55152	5e-05	0.00413767
ENSMUST00000037565	ENSMUSG00000066000	Zfp979	chr4:147611936-147642513	0.963138	2.81963	-1.54969	0.0001	0.00752154
ENSMUST00000044311	ENSMUSG00000032649	Colgalt2	chr1:152399829-152510695	2.92773	8.56665	-1.54895	5e-05	0.00413767
ENSMUST00000015498	ENSMUSG00000015354	Pcolce2	chr9:95637600-95698096	20.5083	59.644	-1.54017	5e-05	0.00413767
ENSMUST00000178224	ENSMUSG00000094910	D430019H16Rik	chr12:105453855-105493095	1.54858	4.50191	-1.53959	5e-05	0.00413767
ENSMUST00000116586	ENSMUSG00000052516	Robo2	chr16:73892305-74411785	2.12833	6.16695	-1.53484	0.001	0.0477064
ENSMUST00000044729	ENSMUSG00000037973	Ccdc129	chr6:55836894-55978622	1.21085	3.50435	-1.53312	5e-05	0.00413767
ENSMUST00000054107	ENSMUSG00000044952	Kctd21	chr7:97332326-97350213	1.90707	5.50113	-1.52837	0.0001	0.00752154
ENSMUST00000032157	ENSMUSG00000030074	Gxylt2	chr6:100704733-100810913	0.561314	1.61538	-1.52499	5e-05	0.00413767
ENSMUST00000098509	ENSMUSG00000074166	AW146154	chr7:41478873-41499890	1.34897	3.87901	-1.52383	5e-05	0.00413767
ENSMUST00000058747	ENSMUSG00000045555	Mettl24	chr10:40683281-40811083	2.8995	8.32852	-1.52225	5e-05	0.00413767
ENSMUST00000204036	ENSMUSG00000039264	Gimap3	chr6:48764463-48770851	3.01187	8.65118	-1.52224	5e-05	0.00413767
ENSMUST00000043077	ENSMUSG00000035686	Thrsp	chr7:97412937-97417730	2.25701	6.4483	-1.51451	0.00035	0.0211828
ENSMUST00000114732	ENSMUSG00000029869	Ephb6	chr6:41605481-41620509	0.947624	2.69659	-1.50875	0.00015	0.0105044
ENSMUST00000048183	ENSMUSG00000041559	Fmod	chr1:134037253-134048277	1.27192	3.60825	-1.5043	0.0001	0.00752154
ENSMUST00000033512	ENSMUSG00000031170	Slc38a5	chrX:8271132-8280179	3.06195	8.67179	-1.50188	0.00015	0.0105044
ENSMUST00000109060	ENSMUSG00000090093	Gm14399	chr2:175129492-175142012	2.20405	6.22696	-1.49837	0.0002	0.0133323
ENSMUST00000023356	ENSMUSG00000022676	Snai2	chr16:14705851-14709395	2.13313	6.00683	-1.49363	5e-05	0.00413767
ENSMUST00000114024	ENSMUSG00000047996	Prrg1	chrX:78449612-78583896	1.95014	5.48543	-1.49203	0.00055	0.0301111
ENSMUST00000031549	ENSMUSG00000073555	Gm4951	chr18:60212079-60247820	1.25094	3.51276	-1.4896	0.00025	0.016035
ENSMUST00000038455	ENSMUSG00000070868	Skint3	chr4:112232244-112300468	0.527671	1.47943	-1.48733	0.00065	0.0342624
ENSMUST00000031278	ENSMUSG00000029335	Bmp3	chr5:98854414-98884396	7.99475	22.3504	-1.48318	5e-05	0.00413767
ENSMUST00000074783	ENSMUSG00000066842	Hmcn1	chr1:150562523-150993051	6.44343	17.9761	-1.48018	5e-05	0.00413767
ENSMUST00000047812	ENSMUSG00000035000	Dpp4	chr2:62330072-62470913	12.1706	33.9147	-1.47851	5e-05	0.00413767
ENSMUST00000095360	ENSMUSG00000020053	Igf1	chr10:87858264-87937042	5.02235	13.9778	-1.4767	5e-05	0.00413767
ENSMUST00000066166	ENSMUSG00000053626	Tll1	chr8:64014930-64206271	1.10638	3.07132	-1.47301	5e-05	0.00413767
ENSMUST00000023750	ENSMUSG00000023011	Faim2	chr15:99497004-99528017	1.57594	4.37315	-1.47247	5e-05	0.00413767
ENSMUST00000024857	ENSMUSG00000024063	Lbh	chr17:72918304-72941942	37.0562	102.772	-1.47166	5e-05	0.00413767
ENSMUST00000054351	ENSMUSG00000049001	Ndnf	chr6:65671589-65712326	20.8437	57.8045	-1.47157	5e-05	0.00413767
ENSMUST00000110800	ENSMUSG00000071176	Arhgef10	chr8:14911662-15001085	2.38846	6.61734	-1.47017	0.0006	0.0322352
ENSMUST00000035931	ENSMUSG00000037892	Pcdh18	chr3:49743295-49757316	7.69339	21.1887	-1.46161	5e-05	0.00413767
ENSMUST00000104937	ENSMUSG00000078137	Ankrd63	chr2:118699102-118703963	3.04937	8.3861	-1.45949	5e-05	0.00413767
ENSMUST00000023441	ENSMUSG00000022758	P2rx6	chr16:17561884-17572011	1.1985	3.29437	-1.45877	0.0002	0.0133323
ENSMUST00000055071	ENSMUSG00000079017	Ifi27l2a	chr12:103442166-103443680	44.48	121.593	-1.45083	5e-05	0.00413767
ENSMUST00000117200	ENSMUSG00000052516	Robo2	chr16:73892305-74411785	3.28898	8.96435	-1.44656	5e-05	0.00413767
ENSMUST00000040667	ENSMUSG00000031079	Zfp300	chrX:21079173-21089229	0.49359	1.34202	-1.44303	0.0004	0.0235705
ENSMUST00000167446	ENSMUSG00000047757	Fancb	chrX:164980591-164997272	1.11603	3.03426	-1.44296	0.0001	0.00752154
ENSMUST00000115695	ENSMUSG00000031147	Magix	chrX:7674625-7681089	1.32423	3.5938	-1.44035	0.00085	0.0421601
ENSMUST00000037481	ENSMUSG00000033082	Clec1a	chr6:129424771-129452000	14.1457	38.062	-1.42798	5e-05	0.00413767
ENSMUST00000078223	ENSMUSG00000064262	Gimap8	chr6:48647233-48660875	5.11942	13.7523	-1.42562	0.00055	0.0301111
ENSMUST00000102976	ENSMUSG00000015619	Gata3	chr2:9857077-9890034	2.96933	7.97148	-1.42471	5e-05	0.00413767
ENSMUST00000108959	ENSMUSG00000078868	Gm14412	chr2:177314519-177324307	1.55452	4.17159	-1.42413	0.001	0.0477064
ENSMUST00000032179	ENSMUSG00000030091	Nup210	chr6:91013067-91116829	4.52623	12.0972	-1.41829	5e-05	0.00413767
ENSMUST00000045503	ENSMUSG00000037754	Ppp1r16b	chr2:158665397-158766334	13.2016	35.2464	-1.41676	5e-05	0.00413767
ENSMUST00000106766	ENSMUSG00000078606	Gm4070	chr7:105895138-106093337	0.547021	1.45799	-1.41431	0.0002	0.0133323
ENSMUST00000037547	ENSMUSG00000040035	Disp2	chr2:118779718-118811293	2.94762	7.83445	-1.41028	5e-05	0.00413767
ENSMUST00000004326	ENSMUSG00000031398	Plxna3	chrX:74329065-74344689	0.426616	1.13159	-1.40735	0.00055	0.0301111
ENSMUST00000108947	ENSMUSG00000094786	Gm14403	chr2:177498314-177509763	3.62344	9.59351	-1.4047	0.0006	0.0322352
ENSMUST00000203162	ENSMUSG00000033082	Clec1a	chr6:129424771-129452000	10.0585	26.5551	-1.40057	5e-05	0.00413767
ENSMUST00000102817	ENSMUSG00000047261	Gap43	chr16:42248441-42340651	4.89913	12.9301	-1.40014	0.00015	0.0105044
ENSMUST00000108864	ENSMUSG00000055333	Fat2	chr11:55250608-55336564	0.41286	1.08905	-1.39934	5e-05	0.00413767
ENSMUST00000178884	ENSMUSG00000027347	Rasgrp1	chr2:117279992-117343001	1.18223	3.11149	-1.3961	5e-05	0.00413767
ENSMUST00000045097	ENSMUSG00000040253	Gbp7	chr3:142530341-142550149	6.50673	17.0891	-1.39307	5e-05	0.00413767
ENSMUST00000041183	ENSMUSG00000036144	Meox2	chr12:37108539-37179534	4.71759	12.3634	-1.38995	5e-05	0.00413767
ENSMUST00000111234	ENSMUSG00000060548	Tnfrsf19	chr14:60963833-61046855	3.70352	9.67596	-1.38551	5e-05	0.00413767
ENSMUST00000053456	ENSMUSG00000050379	2017-09-06	chrX:36911325-36991794	1.38924	3.62713	-1.38454	0.0001	0.00752154
ENSMUST00000072008	ENSMUSG00000057719	Sh3rf2	chr18:42053666-42158960	3.32777	8.68508	-1.38398	5e-05	0.00413767
ENSMUST00000072299	ENSMUSG00000054459	Vsnl1	chr12:11325246-11436649	4.10514	10.699	-1.38197	5e-05	0.00413767
ENSMUST00000190457	ENSMUSG00000074217	2210011C24Rik	chr8:84010221-84012171	4.26366	11.0949	-1.37973	5e-05	0.00413767
ENSMUST00000043183	ENSMUSG00000031877	Ces2g	chr8:104961717-104969537	3.35165	8.70309	-1.37666	5e-05	0.00413767
ENSMUST00000147875	ENSMUSG00000072640	Lyrm9	chr11:78826583-78846870	0.771643	1.99991	-1.37393	0.0001	0.00752154
ENSMUST00000020896	ENSMUSG00000020577	Tspan13	chr12:36014556-36042489	52.0368	134.583	-1.37089	5e-05	0.00413767
ENSMUST00000055693	ENSMUSG00000015224	Cyp2j9	chr4:96568428-96591578	1.48624	3.83419	-1.36725	0.00025	0.016035
ENSMUST00000026663	ENSMUSG00000025578	Cbx8	chr11:119036304-119040969	1.02163	2.63046	-1.36445	0.0001	0.00752154
ENSMUST00000000641	ENSMUSG00000000627	Sema4f	chr6:82911884-82939769	2.22715	5.73162	-1.36375	5e-05	0.00413767
ENSMUST00000041168	ENSMUSG00000039116	Adgrg6	chr10:14402582-14545036	11.6921	30.0464	-1.36166	5e-05	0.00413767
ENSMUST00000027451	ENSMUSG00000026235	Epha4	chr1:77367184-77515088	3.24061	8.32476	-1.36114	5e-05	0.00413767
ENSMUST00000036267	ENSMUSG00000033350	Chst2	chr9:95399291-95406722	3.21885	8.25302	-1.35838	5e-05	0.00413767
ENSMUST00000113760	ENSMUSG00000053835	H2-T24	chr17:36005694-36020560	5.05287	12.9544	-1.35827	5e-05	0.00413767
ENSMUST00000028859	ENSMUSG00000027380	Acoxl	chr2:127854627-128123873	4.54718	11.6243	-1.3541	5e-05	0.00413767
ENSMUST00000031678	ENSMUSG00000029669	Tspan12	chr6:21771394-21853483	17.2077	43.8535	-1.34964	5e-05	0.00413767
ENSMUST00000055294	ENSMUSG00000050069	Grem2	chr1:174833784-174921819	8.70008	22.1333	-1.34712	5e-05	0.00413767
ENSMUST00000103109	ENSMUSG00000017167	Cntnap1	chr11:101176040-101190724	0.456012	1.15832	-1.34489	0.00085	0.0421601
ENSMUST00000084141	ENSMUSG00000069743	Zfp820	chr17:21816875-21845759	1.45648	3.69662	-1.34372	0.0001	0.00752154
ENSMUST00000030687	ENSMUSG00000028871	Rspo1	chr4:124957646-125009099	2.97261	7.54256	-1.34333	0.0002	0.0133323
ENSMUST00000026670	ENSMUSG00000025582	Nptx1	chr11:119538718-119547753	2.31235	5.86372	-1.34246	5e-05	0.00413767
ENSMUST00000020969	ENSMUSG00000020638	Cmpk2	chr12:26469203-26479835	3.39416	8.59334	-1.34017	5e-05	0.00413767
ENSMUST00000058352	ENSMUSG00000046080	Clec9a	chr6:129408861-129424763	7.37151	18.6497	-1.33912	5e-05	0.00413767
ENSMUST00000023593	ENSMUSG00000022878	Adipoq	chr16:23146535-23158028	2.14007	5.41194	-1.33849	0.0007	0.0362738
ENSMUST00000015771	ENSMUSG00000015627	Gata5	chr2:180325132-180334699	1.69583	4.27526	-1.33402	5e-05	0.00413767
ENSMUST00000079038	ENSMUSG00000064325	Hhip	chr8:79965852-80058006	5.91389	14.8532	-1.32859	5e-05	0.00413767
ENSMUST00000036300	ENSMUSG00000045672	Col27a1	chr4:63215434-63334991	2.20155	5.5267	-1.3279	5e-05	0.00413767
ENSMUST00000071135	ENSMUSG00000062591	Tubb4a	chr17:57080065-57087782	3.89226	9.75788	-1.32596	5e-05	0.00413767
ENSMUST00000051720	ENSMUSG00000045629	Sh3tc2	chr18:61953074-62015715	2.83888	7.10229	-1.32296	5e-05	0.00413767
ENSMUST00000042792	ENSMUSG00000034810	Scn7a	chr2:66673424-66784914	61.0573	152.439	-1.31999	5e-05	0.00413767
ENSMUST00000133371	ENSMUSG00000036923	Stox1	chr10:62659042-62726128	0.903061	2.25372	-1.31941	0.00075	0.0382387
ENSMUST00000096013	ENSMUSG00000035258	Abi3bp	chr16:56477845-56690128	8.42139	20.9842	-1.31717	5e-05	0.00413767
ENSMUST00000057070	ENSMUSG00000078995	Zfp456	chr13:67362112-67375810	0.904311	2.25048	-1.31534	0.00045	0.0259452
ENSMUST00000049454	ENSMUSG00000040841	Six5	chr7:19094593-19098549	2.44663	6.08763	-1.31509	0.00015	0.0105044
ENSMUST00000067230	ENSMUSG00000076431	Sox4	chr13:28948918-28953713	15.1542	37.6841	-1.31424	5e-05	0.00413767
ENSMUST00000025862	ENSMUSG00000024921	Smarca2	chr19:26605049-26823907	16.8175	41.55	-1.30489	5e-05	0.00413767
ENSMUST00000035155	ENSMUSG00000032549	Rab6b	chr9:103111786-103185276	6.33014	15.6274	-1.30377	5e-05	0.00413767
ENSMUST00000102718	ENSMUSG00000034848	Ttc21b	chr2:66184326-66256617	1.62997	4.02142	-1.30286	0.00025	0.016035
ENSMUST00000042054	ENSMUSG00000038402	Foxf2	chr13:31625815-31631403	8.12947	20.0554	-1.30276	5e-05	0.00413767
ENSMUST00000031542	ENSMUSG00000029561	Oasl2	chr5:114896935-114912234	6.37018	15.701	-1.30146	5e-05	0.00413767
ENSMUST00000087321	ENSMUSG00000067279	Ppp1r3c	chr19:36731736-36736653	3.7748	9.28788	-1.29895	5e-05	0.00413767
ENSMUST00000020971	ENSMUSG00000020642	Rnf144a	chr12:26306796-26415256	10.2391	25.174	-1.29784	0.00015	0.0105044
ENSMUST00000113516	ENSMUSG00000062960	Kdr	chr5:75932826-75978458	46.1434	113.318	-1.29618	5e-05	0.00413767
ENSMUST00000091137	ENSMUSG00000037016	Frem2	chr3:53513937-53657355	0.341255	0.837833	-1.29581	0.0002	0.0133323
ENSMUST00000022518	ENSMUSG00000021951	Eef1akmt1	chr14:57549597-57571569	4.83622	11.8478	-1.29266	0.00065	0.0342624
ENSMUST00000102517	ENSMUSG00000027314	Dll4	chr2:119325783-119335962	13.465	32.9059	-1.28913	5e-05	0.00413767
ENSMUST00000094807	ENSMUSG00000070802	Pnmal2	chr7:16944681-16948828	0.798432	1.95072	-1.28877	0.0004	0.0235705
ENSMUST00000081022	ENSMUSG00000062861	Zfp28	chr7:6383294-6396915	1.10805	2.70613	-1.28821	0.00015	0.0105044
ENSMUST00000107424	ENSMUSG00000059810	Rgs3	chr4:62559846-62704001	6.19863	15.1106	-1.28554	0.0001	0.00752154
ENSMUST00000037623	ENSMUSG00000039114	Nrn1	chr13:36725624-36734477	4.98283	12.134	-1.28401	5e-05	0.00413767
ENSMUST00000119730	ENSMUSG00000051359	Ncald	chr15:37366174-37792570	9.25715	22.5014	-1.28137	5e-05	0.00413767
ENSMUST00000026896	ENSMUSG00000025789	St8sia2	chr7:73939118-74013690	1.49733	3.63592	-1.27993	0.0001	0.00752154
ENSMUST00000121869	ENSMUSG00000064061	Dzip3	chr16:48924231-48994165	1.263	3.06214	-1.27769	0.00085	0.0421601
ENSMUST00000037353	ENSMUSG00000034457	Eda2r	chrX:97333839-97377216	0.62291	1.50449	-1.27218	0.0009	0.0440307
ENSMUST00000140843	ENSMUSG00000033705	Stard9	chr2:120629125-120716082	10.9237	26.3076	-1.26802	5e-05	0.00413767
ENSMUST00000081728	ENSMUSG00000022240	Ctnnd2	chr15:30172592-31029311	1.67404	4.02194	-1.26456	5e-05	0.00413767
ENSMUST00000020346	ENSMUSG00000020137	Thap2	chr10:115369965-115384435	2.54547	6.11386	-1.26415	5e-05	0.00413767
ENSMUST00000043149	ENSMUSG00000042351	Grap2	chr15:80623504-80650559	1.7268	4.11201	-1.25175	0.00035	0.0211828
ENSMUST00000004232	ENSMUSG00000074207	Adh1	chr3:138277493-138307022	30.7282	72.7407	-1.2432	5e-05	0.00413767
ENSMUST00000049930	ENSMUSG00000045680	Tcf21	chr10:22817278-22823650	20.4145	48.3043	-1.24256	5e-05	0.00413767
ENSMUST00000035216	ENSMUSG00000032596	Uba7	chr9:107975533-107984056	5.92507	14.009	-1.24145	5e-05	0.00413767
ENSMUST00000028106	ENSMUSG00000026768	Itga8	chr2:12106631-12311300	32.3132	76.3851	-1.24117	5e-05	0.00413767
ENSMUST00000106729	ENSMUSG00000007279	Scube2	chr7:109798675-109865679	10.0581	23.7401	-1.23897	5e-05	0.00413767
ENSMUST00000107992	ENSMUSG00000069727	Zfp975	chr7:42660104-42692718	2.36235	5.57133	-1.2378	0.0002	0.0133323
ENSMUST00000171533	ENSMUSG00000042834	Nrep	chr18:33437018-33464029	22.2083	52.3576	-1.2373	0.0002	0.0133323
ENSMUST00000031707	ENSMUSG00000029695	Aass	chr6:23072172-23132986	0.991132	2.3356	-1.23664	0.00085	0.0421601
ENSMUST00000113028	ENSMUSG00000045414	1190002N15Rik	chr9:94517863-94538081	22.108	52.0603	-1.23561	5e-05	0.00413767
ENSMUST00000103053	ENSMUSG00000027574	Nkain4	chr2:180934771-180954699	9.89782	23.2964	-1.23493	5e-05	0.00413767
ENSMUST00000058119	ENSMUSG00000048040	Arxes2	chrX:135993823-135995355	3.93914	9.26817	-1.23441	0.0005	0.0280447
ENSMUST00000021822	ENSMUSG00000021390	Ogn	chr13:49464026-49652746	82.0667	193.048	-1.23409	5e-05	0.00413767
ENSMUST00000047783	ENSMUSG00000033282	Rpgrip1l	chr8:91217029-91313262	1.98109	4.65418	-1.23223	5e-05	0.00413767
ENSMUST00000112525	ENSMUSG00000054580	Pla2r1	chr2:60417542-60553923	3.35019	7.86797	-1.23175	5e-05	0.00413767
ENSMUST00000171297	ENSMUSG00000090942	F830016B08Rik	chr18:60293379-60303016	1.66926	3.91863	-1.23114	0.00025	0.016035
ENSMUST00000098179	ENSMUSG00000060441	Trim5	chr7:104263385-104288094	2.45935	5.76853	-1.22993	5e-05	0.00413767
ENSMUST00000050897	ENSMUSG00000043065	Spice1	chr16:44347120-44388497	1.64033	3.82854	-1.2228	0.00025	0.016035
ENSMUST00000110221	ENSMUSG00000022371	Col14a1	chr15:55307749-55520803	5.01748	11.7106	-1.22279	0.00015	0.0105044
ENSMUST00000105283	ENSMUSG00000019966	Kitl	chr10:100015629-100100413	32.0442	74.6296	-1.21968	5e-05	0.00413767
ENSMUST00000198931	ENSMUSG00000031292	Cdkl5	chrX:160768012-160994704	7.69313	17.9038	-1.21862	5e-05	0.00413767
ENSMUST00000005255	ENSMUSG00000005124	Wisp1	chr15:66891319-66923201	2.64021	6.11252	-1.21111	5e-05	0.00413767
ENSMUST00000074233	ENSMUSG00000030554	Synm	chr7:67730159-67759742	3.70541	8.57094	-1.20982	0.00095	0.0458858
ENSMUST00000103134	ENSMUSG00000037944	Ccr7	chr11:99144195-99155077	2.56862	5.92028	-1.20467	0.001	0.0477064
ENSMUST00000108336	ENSMUSG00000037640	Zfp60	chr7:27731388-27753702	1.74673	4.02549	-1.20451	0.00065	0.0342624
ENSMUST00000051672	ENSMUSG00000046718	Bst2	chr8:71534254-71537456	26.605	61.2649	-1.20336	5e-05	0.00413767
ENSMUST00000097877	ENSMUSG00000061894	Zscan20	chr4:128583546-128610098	0.900975	2.07216	-1.20157	0.00055	0.0301111
ENSMUST00000026013	ENSMUSG00000025037	Maoa	chrX:16619697-16687818	10.9652	25.2048	-1.20076	5e-05	0.00413767
ENSMUST00000124341	ENSMUSG00000006576	Slc4a3	chr1:75546265-75562172	0.976386	2.23346	-1.19376	0.00015	0.0105044
ENSMUST00000182407	ENSMUSG00000061601	Pclo	chr5:14514917-14863459	0.422212	0.962519	-1.18885	5e-05	0.00413767
ENSMUST00000097961	ENSMUSG00000073792	Alg6	chr4:99715664-99763460	1.80788	4.12072	-1.1886	0.0005	0.0280447
ENSMUST00000032260	ENSMUSG00000030157	Clec2d	chr6:129180614-129186534	138.807	315.529	-1.18469	5e-05	0.00413767
ENSMUST00000023460	ENSMUSG00000022774	Ncbp2	chr16:31948512-31958472	8.42645	19.1485	-1.18423	5e-05	0.00413767
ENSMUST00000064659	ENSMUSG00000052676	Zmat1	chrX:134971371-135009209	1.52176	3.45008	-1.18089	0.0005	0.0280447
ENSMUST00000039742	ENSMUSG00000035878	Hykk	chr9:54917282-54949924	1.63156	3.68862	-1.17683	0.0002	0.0133323
ENSMUST00000042025	ENSMUSG00000033420	Antxr1	chr6:87133852-87335764	22.3267	50.2574	-1.17057	5e-05	0.00413767
ENSMUST00000093902	ENSMUSG00000070327	Rnf213	chr11:119393099-119491235	13.1962	29.6741	-1.16908	5e-05	0.00413767
ENSMUST00000024810	ENSMUSG00000024013	Fgd2	chr17:29360941-29379553	2.32041	5.20784	-1.1663	0.0008	0.0401414
ENSMUST00000160298	ENSMUSG00000089901	Gm8113	chr14:43925389-43933411	2.21774	4.96842	-1.1637	0.0006	0.0322352
ENSMUST00000056117	ENSMUSG00000015533	Itga2	chr13:114835915-114932041	4.10176	9.18338	-1.16278	5e-05	0.00413767
ENSMUST00000090171	ENSMUSG00000055301	Adh7	chr3:138217759-138233382	2.07919	4.65365	-1.16234	0.0002	0.0133323
ENSMUST00000047480	ENSMUSG00000041482	Piezo2	chr18:63010212-63387183	4.43965	9.92586	-1.16075	5e-05	0.00413767
ENSMUST00000052718	ENSMUSG00000047959	Kcna3	chr3:107036168-107038070	3.86061	8.62151	-1.15911	0.0003	0.0186561
ENSMUST00000116436	ENSMUSG00000019256	Ahr	chr12:35497973-35535038	19.8192	44.1913	-1.15686	5e-05	0.00413767
ENSMUST00000092162	ENSMUSG00000069515	Lyz1	chr10:117287795-117292868	170.472	379.521	-1.15464	5e-05	0.00413767
ENSMUST00000029845	ENSMUSG00000028194	Ddah1	chr3:145758674-145894277	3.77299	8.37529	-1.15043	5e-05	0.00413767
ENSMUST00000006667	ENSMUSG00000045868	Gvin1	chr7:106156555-106215326	0.644008	1.42933	-1.15019	0.001	0.0477064
ENSMUST00000102596	ENSMUSG00000000409	Lck	chr4:129548343-129573641	2.16693	4.79382	-1.14553	0.00105	0.0494336
ENSMUST00000020452	ENSMUSG00000020230	Prmt2	chr10:76207221-76237865	6.25781	13.8074	-1.14171	0.00065	0.0342624
ENSMUST00000009877	ENSMUSG00000009733	Tfcp2	chr15:100502798-100552008	2.16245	4.76951	-1.14117	0.00085	0.0421601
ENSMUST00000040616	ENSMUSG00000034110	Kctd7	chr5:130144860-130155806	1.53591	3.38541	-1.14024	0.00035	0.0211828
ENSMUST00000107289	ENSMUSG00000028399	Ptprd	chr4:75941237-76594299	6.91157	15.2284	-1.13968	0.0001	0.00752154
ENSMUST00000025488	ENSMUSG00000024592	C330018D20Rik	chr18:56955832-56975368	2.01795	4.44339	-1.13877	0.001	0.0477064
ENSMUST00000147041	ENSMUSG00000040969	Arhgef38	chr3:133112277-133234949	5.50753	12.0855	-1.1338	5e-05	0.00413767
ENSMUST00000016569	ENSMUSG00000034021	Pds5b	chr5:150673738-150810690	4.24629	9.29703	-1.13057	0.0007	0.0362738
ENSMUST00000098192	ENSMUSG00000073940	Hbb-bt	chr7:103812523-103813996	141.368	308.918	-1.12777	0.00045	0.0259452
ENSMUST00000052837	ENSMUSG00000046532	Ar	chrX:98148768-98323215	1.56335	3.40281	-1.12208	5e-05	0.00413767
ENSMUST00000044766	ENSMUSG00000027309	4930402H24Rik	chr2:130706199-130906406	7.42237	16.1433	-1.12099	5e-05	0.00413767
ENSMUST00000078752	ENSMUSG00000060227	Casc4	chr2:121866969-121936220	13.0738	28.4172	-1.12008	0.0001	0.00752154
ENSMUST00000115557	ENSMUSG00000058192	Zfp846	chr9:20581324-20605409	0.732678	1.59068	-1.11839	0.0003	0.0186561
ENSMUST00000210490	ENSMUSG00000110185	Igip	chr18:36300100-36301517	8.93609	19.3615	-1.11548	0.00015	0.0105044
ENSMUST00000087623	ENSMUSG00000024299	Adamts10	chr17:33524203-33553768	17.0544	36.8776	-1.11261	5e-05	0.00413767
ENSMUST00000027837	ENSMUSG00000026556	Vangl2	chr1:172000959-172028444	1.8637	4.02755	-1.11174	0.00035	0.0211828
ENSMUST00000091201	ENSMUSG00000042348	Arl15	chr13:113794504-114157461	14.076	30.3816	-1.10996	5e-05	0.00413767
ENSMUST00000059037	ENSMUSG00000057143	Trim12c	chr7:104338753-104353362	7.33759	15.78	-1.10471	5e-05	0.00413767
ENSMUST00000196520	ENSMUSG00000104713	Gbp6	chr5:105214906-105293696	3.28928	7.06924	-1.10378	0.0005	0.0280447
ENSMUST00000048718	ENSMUSG00000037022	Mmaa	chr8:79263597-79294937	1.33391	2.86529	-1.10302	0.00045	0.0259452
ENSMUST00000031670	ENSMUSG00000032766	Gng11	chr6:4003903-4008445	38.1451	81.7617	-1.09993	5e-05	0.00413767
ENSMUST00000023550	ENSMUSG00000022844	Pdia5	chr16:35397312-35490873	4.5628	9.75614	-1.09639	0.0005	0.0280447
ENSMUST00000076095	ENSMUSG00000025856	Pdgfa	chr5:138976013-138997370	13.0376	27.8539	-1.0952	0.00025	0.016035
ENSMUST00000039305	ENSMUSG00000020264	Slc36a2	chr11:55158469-55185077	5.52621	11.7966	-1.09401	0.00045	0.0259452
ENSMUST00000148517	ENSMUSG00000030116	Mfap5	chr6:122505844-122529290	11.3125	24.1172	-1.09214	0.0005	0.0280447
ENSMUST00000171284	ENSMUSG00000055660	Mettl4	chr17:94727079-94749892	3.08586	6.5729	-1.09086	0.0008	0.0401414
ENSMUST00000089520	ENSMUSG00000068270	Shroom4	chrX:6399853-6637448	6.34421	13.5016	-1.08962	5e-05	0.00413767
ENSMUST00000167085	ENSMUSG00000038305	Spats2l	chr1:57774161-57948394	2.47926	5.27341	-1.08883	0.001	0.0477064
ENSMUST00000057893	ENSMUSG00000050288	Fzd2	chr11:102604395-102608058	4.20906	8.95248	-1.08879	5e-05	0.00413767
ENSMUST00000082237	ENSMUSG00000057706	Mex3b	chr7:82867332-82871515	1.90449	4.04682	-1.08738	0.0009	0.0440307
ENSMUST00000004587	ENSMUSG00000004473	Clec11a	chr7:44302686-44306902	1.63929	3.47874	-1.0855	0.001	0.0477064
ENSMUST00000028233	ENSMUSG00000026874	Hc	chr2:34983330-35061438	71.2173	150.905	-1.08334	0.0005	0.0280447
ENSMUST00000121393	ENSMUSG00000078899	Gm4631	chr2:175321954-175338197	12.868	27.2263	-1.08122	5e-05	0.00413767
ENSMUST00000034941	ENSMUSG00000032377	Plscr4	chr9:92457372-92492456	10.4499	22.0438	-1.07688	5e-05	0.00413767
ENSMUST00000058524	ENSMUSG00000047749	Zc3hav1l	chr6:38287395-38299259	1.40052	2.94982	-1.07466	0.0002	0.0133323
ENSMUST00000026917	ENSMUSG00000025810	Nrp1	chr8:128359283-128503363	61.2197	128.835	-1.07345	5e-05	0.00413767
ENSMUST00000087399	ENSMUSG00000033327	Tnxb	chr17:34670534-34719815	10.6889	22.4326	-1.06948	5e-05	0.00413767
ENSMUST00000040655	ENSMUSG00000036594	H2-Aa	chr17:34282743-34287827	131.845	276.289	-1.06733	5e-05	0.00413767
ENSMUST00000098614	ENSMUSG00000071064	Zfp827	chr8:79028436-79193766	1.8678	3.91346	-1.0671	0.0007	0.0362738
ENSMUST00000001327	ENSMUSG00000001281	Itgb7	chr15:102215994-102231935	3.82145	8.00577	-1.06692	0.00025	0.016035
ENSMUST00000066674	ENSMUSG00000041261	Car8	chr4:8143361-8239041	22.9754	48.0814	-1.06539	5e-05	0.00413767
ENSMUST00000089874	ENSMUSG00000071856	Mcc	chr18:44425059-44812182	11.6618	24.3882	-1.06439	5e-05	0.00413767
ENSMUST00000118160	ENSMUSG00000037846	Rtkn2	chr10:67979569-68043868	18.1702	37.8941	-1.0604	0.00035	0.0211828
ENSMUST00000151408	ENSMUSG00000021708	Rasgrf2	chr13:91880399-92131656	4.52409	9.39017	-1.05352	0.00035	0.0211828
ENSMUST00000035899	ENSMUSG00000038982	Bloc1s5	chr13:38602708-38635109	3.44027	7.12954	-1.05129	0.0009	0.0440307
ENSMUST00000062606	ENSMUSG00000042985	Upk3b	chr5:136038495-136046487	6.55871	13.5893	-1.05099	5e-05	0.00413767
ENSMUST00000113975	ENSMUSG00000089774	Slc5a3	chr16:92058269-92112227	2.19043	4.53417	-1.04962	5e-05	0.00413767
ENSMUST00000114561	ENSMUSG00000068551	Zfp467	chr6:48427696-48445825	4.38997	9.08009	-1.04849	0.00045	0.0259452
ENSMUST00000034723	ENSMUSG00000013584	Aldh1a2	chr9:71215788-71296243	3.63803	7.52295	-1.04814	0.00065	0.0342624
ENSMUST00000046223	ENSMUSG00000041828	Abca8a	chr11:110025633-110095978	20.7922	42.9652	-1.04712	5e-05	0.00413767
ENSMUST00000048432	ENSMUSG00000041577	Prelp	chr1:133910303-133921414	54.005	111.429	-1.04497	5e-05	0.00413767
ENSMUST00000143264	ENSMUSG00000074733	Zfp950	chr19:61117123-61140817	4.1687	8.58301	-1.04189	0.00055	0.0301111
ENSMUST00000029567	ENSMUSG00000027955	Fam198b	chr3:79884532-79946280	8.26947	17.0181	-1.0412	5e-05	0.00413767
ENSMUST00000098414	ENSMUSG00000074093	Svip	chr7:51997170-52006018	3.32938	6.84342	-1.03946	0.0003	0.0186561
ENSMUST00000079652	ENSMUSG00000063060	Sox7	chr14:63943673-63950732	15.4876	31.7101	-1.03383	5e-05	0.00413767
ENSMUST00000046049	ENSMUSG00000040181	Fmo1	chr1:162829560-162866610	94.0976	191.945	-1.02847	0.0002	0.0133323
ENSMUST00000075190	ENSMUSG00000031673	Cdh11	chr8:102632094-102785642	15.1284	30.8213	-1.02667	5e-05	0.00413767
ENSMUST00000077972	ENSMUSG00000042359	Osbpl6	chr2:76406537-76600647	4.2485	8.65238	-1.02614	0.00055	0.0301111
ENSMUST00000108949	ENSMUSG00000089756	Zfp966	chr2:175918880-175931100	3.69601	7.50945	-1.02274	0.0004	0.0235705
ENSMUST00000081769	ENSMUSG00000034488	Edil3	chr13:88821471-89323223	3.32318	6.7515	-1.02264	0.0005	0.0280447
ENSMUST00000032198	ENSMUSG00000030107	Usp18	chr6:121245905-121272685	4.93599	10.0216	-1.0217	0.00065	0.0342624
ENSMUST00000095187	ENSMUSG00000024135	Srbd1	chr17:85984664-86145175	3.067	6.222	-1.02055	0.0006	0.0322352
ENSMUST00000062254	ENSMUSG00000045930	Clec14a	chr12:58264719-58269258	55.91	113.423	-1.02053	5e-05	0.00413767
ENSMUST00000061673	ENSMUSG00000042284	Itga1	chr13:114958078-115101964	38.7193	78.5439	-1.02045	0.0001	0.00752154
ENSMUST00000031426	ENSMUSG00000029469	Ift81	chr5:122550203-122614518	5.1986	10.4997	-1.01416	5e-05	0.00413767
ENSMUST00000047275	ENSMUSG00000040605	Bace2	chr16:97356727-97439012	2.3409	4.71183	-1.00923	0.00085	0.0421601
ENSMUST00000069451	ENSMUSG00000055737	Ghr	chr15:3317759-3583230	15.6491	31.4521	-1.00707	0.00015	0.0105044
ENSMUST00000029170	ENSMUSG00000027641	Rbl1	chr2:157145892-157204512	3.31722	6.66604	-1.00686	0.00015	0.0105044
ENSMUST00000051572	ENSMUSG00000045954	Sdpr	chr1:51289125-51302960	138.595	278.129	-1.00488	5e-05	0.00413767
ENSMUST00000028081	ENSMUSG00000026748	Plxdc2	chr2:16356303-16755839	22.786	45.6846	-1.00356	0.0002	0.0133323
ENSMUST00000097888	ENSMUSG00000041530	Ago1	chr4:126435011-126468583	11.8741	23.7933	-1.00274	5e-05	0.00413767
ENSMUST00000047666	ENSMUSG00000041731	Pgm5	chr19:24683015-24861855	7.0071	14.0201	-1.00061	0.0002	0.0133323
ENSMUST00000073364	ENSMUSG00000025262	Fam120c	chrX:151344174-151471842	2.08085	4.16189	-1.00006	0.00085	0.0421601
ENSMUST00000039956	ENSMUSG00000034591	Slc41a2	chr10:83230847-83337882	5.49515	2.74588	1.00089	0.00025	0.016035
ENSMUST00000046246	ENSMUSG00000021493	Pdlim7	chr13:55498415-55513676	23.799	11.8636	1.00435	0.00035	0.0211828
ENSMUST00000017153	ENSMUSG00000017009	Sdc4	chr2:164424246-164443186	189.524	94.1872	1.00878	5e-05	0.00413767
ENSMUST00000127638	ENSMUSG00000004040	Stat3	chr11:100859350-100939540	74.6991	37.1165	1.00903	0.00015	0.0105044
ENSMUST00000092584	ENSMUSG00000069662	Marcks	chr10:37133374-37138920	156.846	77.8832	1.00996	5e-05	0.00413767
ENSMUST00000103182	ENSMUSG00000027339	Rassf2	chr2:131989414-132030258	15.98	7.93092	1.01071	0.0005	0.0280447
ENSMUST00000021880	ENSMUSG00000044258	Ctla2a	chr13:60934154-60936625	187.951	93.2632	1.01097	5e-05	0.00413767
ENSMUST00000019386	ENSMUSG00000005251	Ripk4	chr16:97741932-97763737	11.3872	5.63788	1.01418	0.0007	0.0362738
ENSMUST00000026318	ENSMUSG00000025283	Sat1	chrX:155213131-155216449	197.826	97.6608	1.01838	5e-05	0.00413767
ENSMUST00000105362	ENSMUSG00000069565	Dazap1	chr10:80261485-80288408	35.9699	17.7358	1.02013	0.00025	0.016035
ENSMUST00000003635	ENSMUSG00000003541	Ier3	chr17:35821683-35822923	132.519	65.1895	1.02349	5e-05	0.00413767
ENSMUST00000014221	ENSMUSG00000014077	Chp1	chr2:119547696-119587027	100.813	49.5575	1.0245	5e-05	0.00413767
ENSMUST00000019064	ENSMUSG00000018920	Cxcl16	chr11:70453982-70466202	32.3911	15.922	1.02458	0.0003	0.0186561
ENSMUST00000081649	ENSMUSG00000060591	Ifitm2	chr7:140948957-140967073	528.103	259.353	1.0259	5e-05	0.00413767
ENSMUST00000051558	ENSMUSG00000041235	Chd7	chr4:8690469-8867659	13.8862	6.81472	1.02692	5e-05	0.00413767
ENSMUST00000166750	ENSMUSG00000034390	Cmip	chr8:117257063-117459430	49.7256	24.3984	1.02721	5e-05	0.00413767
ENSMUST00000082059	ENSMUSG00000018166	Erbb3	chr10:128567522-128589652	30.4424	14.9123	1.02958	5e-05	0.00413767
ENSMUST00000001672	ENSMUSG00000001627	Ifrd1	chr12:40201566-40248504	27.6084	13.5157	1.03047	0.0002	0.0133323
ENSMUST00000179218	ENSMUSG00000021192	Golga5	chr12:102469133-102497902	27.4064	13.3497	1.03771	5e-05	0.00413767
ENSMUST00000021207	ENSMUSG00000020846	Rflnb	chr11:76019193-76027782	23.8857	11.5907	1.04319	5e-05	0.00413767
ENSMUST00000046266	ENSMUSG00000042507	Elmsan1	chr12:84149175-84218881	25.857	12.5368	1.04438	0.00045	0.0259452
ENSMUST00000032961	ENSMUSG00000030717	Nupr1	chr7:126623248-126625676	245.647	119.078	1.04468	5e-05	0.00413767
ENSMUST00000082136	ENSMUSG00000059436	Max	chr12:76937268-76962248	36.295	17.5772	1.04607	0.0003	0.0186561
ENSMUST00000095078	ENSMUSG00000007476	Lrrc8a	chr2:30237714-30263790	56.0552	27.1463	1.0461	5e-05	0.00413767
ENSMUST00000099112	ENSMUSG00000025348	Itga7	chr10:128933812-128960988	8.6128	4.16948	1.04661	5e-05	0.00413767
ENSMUST00000020668	ENSMUSG00000020399	Havcr2	chr11:46454934-46481255	7.37656	3.57044	1.04685	0.00045	0.0259452
ENSMUST00000033880	ENSMUSG00000031490	Eif4ebp1	chr8:27260328-27276674	17.962	8.6825	1.04877	0.0001	0.00752154
ENSMUST00000053871	ENSMUSG00000046841	Ckap4	chr10:84526304-84534062	34.0958	16.4366	1.05268	5e-05	0.00413767
ENSMUST00000099492	ENSMUSG00000035621	Midn	chr10:80148271-80158368	39.6646	19.0807	1.05574	0.00055	0.0301111
ENSMUST00000105107	ENSMUSG00000069273	Hist1h3e	chr13:23561533-23562369	58.3816	28.0428	1.05788	5e-05	0.00413767
ENSMUST00000036229	ENSMUSG00000033323	Ctdp1	chr18:80407958-80469695	14.9689	7.18238	1.05944	5e-05	0.00413767
ENSMUST00000016664	ENSMUSG00000016520	Lnx2	chr5:147016654-147076586	23.2653	11.1557	1.0604	0.00015	0.0105044
ENSMUST00000033056	ENSMUSG00000030793	Pycard	chr7:127989707-127993867	7.90947	3.79153	1.0608	0.00025	0.016035
ENSMUST00000161356	ENSMUSG00000042453	Reln	chr5:21884453-22344702	2.71001	1.29761	1.06244	0.00065	0.0342624
ENSMUST00000022082	ENSMUSG00000021591	Glrx	chr13:75839867-75850151	36.2746	17.3514	1.06391	5e-05	0.00413767
ENSMUST00000002976	ENSMUSG00000002897	Il17ra	chr6:120463246-120487559	13.2105	6.31442	1.06496	5e-05	0.00413767
ENSMUST00000038169	ENSMUSG00000033307	Mif	chr10:75859352-75860250	93.5717	44.6481	1.06747	5e-05	0.00413767
ENSMUST00000023807	ENSMUSG00000023046	Igfbp6	chr15:102144361-102149511	167.292	79.8234	1.06749	0.0001	0.00752154
ENSMUST00000045154	ENSMUSG00000037731	Themis2	chr4:132781842-132796387	16.0625	7.66407	1.06751	5e-05	0.00413767
ENSMUST00000176957	ENSMUSG00000021996	Esd	chr14:74732296-74750765	84.0335	40.0802	1.06808	0.00015	0.0105044
ENSMUST00000114336	ENSMUSG00000048707	Tprn	chr2:25262617-25269885	5.74019	2.73758	1.0682	0.00065	0.0342624
ENSMUST00000037540	ENSMUSG00000032860	P2ry2	chr7:100996567-101012866	9.4559	4.50668	1.06915	0.0003	0.0186561
ENSMUST00000196981	ENSMUSG00000032497	Lrrfip2	chr9:111117591-111225668	42.6432	20.3197	1.06944	0.00015	0.0105044
ENSMUST00000177978	ENSMUSG00000094103	1700047I17Rik2	chr12:55199532-55214076	27.3567	13.0012	1.07325	0.0002	0.0133323
ENSMUST00000120539	ENSMUSG00000028266	Lmo4	chr3:144188529-144205220	35.2035	16.7253	1.07369	0.00055	0.0301111
ENSMUST00000029629	ENSMUSG00000027999	Pla2g12a	chr3:129878605-129895825	18.7363	8.90097	1.0738	5e-05	0.00413767
ENSMUST00000000080	ENSMUSG00000000078	Klf6	chr13:5861488-5870393	115.971	55.0811	1.07413	5e-05	0.00413767
ENSMUST00000047286	ENSMUSG00000037798	Mat1a	chr14:41105380-41124412	7.07604	3.35913	1.07486	0.00015	0.0105044
ENSMUST00000164532	ENSMUSG00000022378	Fam49b	chr15:63929096-64060448	35.7218	16.9494	1.07557	0.00035	0.0211828
ENSMUST00000036540	ENSMUSG00000041040	Fam117b	chr1:59913005-59985346	46.4666	22.0453	1.07572	5e-05	0.00413767
ENSMUST00000080926	ENSMUSG00000063524	Eno1	chr4:150236720-150248879	97.5086	46.2252	1.07685	5e-05	0.00413767
ENSMUST00000026407	ENSMUSG00000025351	Cd63	chr10:128908918-128912816	241.831	114.448	1.07931	5e-05	0.00413767
ENSMUST00000025818	ENSMUSG00000024883	Rin1	chr19:5050807-5057071	2.63992	1.24719	1.08181	0.00095	0.0458858
ENSMUST00000106079	ENSMUSG00000028796	Phc2	chr4:128654701-128752881	62.7249	29.6183	1.08255	5e-05	0.00413767
ENSMUST00000052839	ENSMUSG00000031217	Efnb1	chrX:99136129-99148991	59.4709	28.0813	1.08258	5e-05	0.00413767
ENSMUST00000038377	ENSMUSG00000036478	Btg1	chr10:96617000-96622813	76.5915	36.1442	1.08342	5e-05	0.00413767
ENSMUST00000030381	ENSMUSG00000028633	Ctps	chr4:120539867-120570276	24.565	11.5882	1.08395	5e-05	0.00413767
ENSMUST00000034086	ENSMUSG00000031661	Nkd1	chr8:88521353-88594884	52.9352	24.9495	1.08522	0.00055	0.0301111
ENSMUST00000024011	ENSMUSG00000023243	Kcnk5	chr14:20140057-20181782	4.70548	2.21746	1.08543	0.00085	0.0421601
ENSMUST00000024932	ENSMUSG00000024121	Atp6v0c	chr17:24163864-24209387	219.923	103.605	1.0859	5e-05	0.00413767
ENSMUST00000033952	ENSMUSG00000031548	Sfrp1	chr8:23411501-23449632	9.71421	4.56671	1.08894	5e-05	0.00413767
ENSMUST00000000348	ENSMUSG00000000339	Rtca	chr3:116488962-116508208	17.2673	8.11594	1.08921	0.0004	0.0235705
ENSMUST00000033621	ENSMUSG00000031266	Gla	chrX:134588148-134601125	7.44982	3.47392	1.10064	0.00015	0.0105044
ENSMUST00000182328	ENSMUSG00000030591	Psmd8	chr7:29174187-29180701	96.9718	45.1342	1.10334	5e-05	0.00413767
ENSMUST00000055390	ENSMUSG00000046768	Rhoj	chr12:75308321-75401456	61.1441	28.4527	1.10365	5e-05	0.00413767
ENSMUST00000016672	ENSMUSG00000016528	Mapkapk2	chr1:131053699-131097826	93.0158	43.2692	1.10414	5e-05	0.00413767
ENSMUST00000033050	ENSMUSG00000030787	Lyve1	chr7:110850606-110863239	211.024	98.1627	1.10416	5e-05	0.00413767
ENSMUST00000021239	ENSMUSG00000020869	Lrrc59	chr11:94629766-94660089	44.6522	20.7676	1.10439	5e-05	0.00413767
ENSMUST00000020886	ENSMUSG00000020572	Nampt	chr12:32820334-32853369	48.0673	22.3379	1.10556	5e-05	0.00413767
ENSMUST00000023099	ENSMUSG00000022462	Slc38a2	chr15:96687393-96699698	72.0284	33.4443	1.10681	0.0001	0.00752154
ENSMUST00000085715	ENSMUSG00000030397	Mark4	chr7:19424774-19458821	23.8224	11.0465	1.10873	5e-05	0.00413767
ENSMUST00000061299	ENSMUSG00000048373	Fgfbp1	chr5:43978857-43981779	20.6741	9.5706	1.11114	0.0005	0.0280447
ENSMUST00000020573	ENSMUSG00000020323	Prss57	chr10:79777271-79790961	8.77232	4.05129	1.11458	0.00105	0.0494336
ENSMUST00000036116	ENSMUSG00000042734	Ttc9	chr12:81631368-81664941	18.6544	8.60822	1.11573	5e-05	0.00413767
ENSMUST00000027931	ENSMUSG00000026622	Nek2	chr1:191821443-191833050	6.12601	2.82036	1.11907	5e-05	0.00413767
ENSMUST00000064234	ENSMUSG00000052397	Ezr	chr17:6673609-6782784	161.582	74.37	1.11947	5e-05	0.00413767
ENSMUST00000008537	ENSMUSG00000008393	Carhsp1	chr16:8658586-8672153	64.2705	29.5793	1.11957	5e-05	0.00413767
ENSMUST00000021796	ENSMUSG00000021367	Edn1	chr13:42301269-42307989	35.6335	16.3807	1.12124	5e-05	0.00413767
ENSMUST00000010451	ENSMUSG00000010307	Tmem86a	chr7:47050600-47054777	13.8247	6.34207	1.12422	0.00015	0.0105044
ENSMUST00000026196	ENSMUSG00000025190	Got1	chr19:43499751-43524605	9.47168	4.33865	1.12637	0.00035	0.0211828
ENSMUST00000057676	ENSMUSG00000050628	Ubald2	chr11:116434093-116439077	62.5025	28.62	1.12689	5e-05	0.00413767
ENSMUST00000002303	ENSMUSG00000002233	Rhoc	chr3:104788374-104794459	108.775	49.759	1.12832	5e-05	0.00413767
ENSMUST00000023803	ENSMUSG00000023043	Krt18	chr15:102028215-102032026	119.337	54.3908	1.1336	5e-05	0.00413767
ENSMUST00000162819	ENSMUSG00000038733	Wdr26	chr1:181173227-181211552	39.3185	17.8963	1.13555	0.0005	0.0280447
ENSMUST00000000299	ENSMUSG00000000290	Itgb2	chr10:77530251-77565686	54.4719	24.7436	1.13846	0.00015	0.0105044
ENSMUST00000022986	ENSMUSG00000022358	Fbxo32	chr15:58175878-58214892	11.7398	5.33199	1.13867	5e-05	0.00413767
ENSMUST00000079132	ENSMUSG00000062778	Chia1	chr3:106113228-106132120	69.4852	31.5478	1.13916	5e-05	0.00413767
ENSMUST00000055676	ENSMUSG00000045092	S1pr1	chr3:115710432-115715072	169.998	77.0393	1.14185	5e-05	0.00413767
ENSMUST00000084203	ENSMUSG00000028917	Plekhm2	chr4:141625733-141664899	14.5234	6.58091	1.14202	5e-05	0.00413767
ENSMUST00000144326	ENSMUSG00000038546	Ranbp9	chr13:43398375-43480973	51.9378	23.5341	1.14203	5e-05	0.00413767
ENSMUST00000051207	ENSMUSG00000048807	Slc35e4	chr11:3907020-3914664	9.94538	4.50443	1.14268	0.0002	0.0133323
ENSMUST00000164957	ENSMUSG00000023048	Prr13	chr15:102459027-102462806	60.9605	27.6025	1.14308	0.0002	0.0133323
ENSMUST00000032892	ENSMUSG00000030657	Xylt1	chr7:117380978-117673580	3.90307	1.76624	1.14392	5e-05	0.00413767
ENSMUST00000042561	ENSMUSG00000038178	Slc43a2	chr11:75531693-75577575	29.5311	13.3513	1.14526	0.00015	0.0105044
ENSMUST00000040914	ENSMUSG00000036181	Hist1h1c	chr13:23738807-23740367	229.996	103.86	1.14697	5e-05	0.00413767
ENSMUST00000010239	ENSMUSG00000010095	Slc3a2	chr19:8706881-8723369	109.497	49.444	1.14703	5e-05	0.00413767
ENSMUST00000005256	ENSMUSG00000005125	Ndrg1	chr15:66929320-66969640	18.7076	8.44694	1.14713	5e-05	0.00413767
ENSMUST00000021674	ENSMUSG00000021250	Fos	chr12:85473889-85477273	37.9585	17.1038	1.1501	5e-05	0.00413767
ENSMUST00000038845	ENSMUSG00000040747	Cd53	chr3:106759920-106790149	73.7209	33.1963	1.15105	5e-05	0.00413767
ENSMUST00000095998	ENSMUSG00000044948	Cfap43	chr19:47894597-47919299	23.8517	10.7369	1.15151	5e-05	0.00413767
ENSMUST00000051209	ENSMUSG00000002265	Peg3	chr7:6703891-6730421	12.0532	5.42151	1.15264	5e-05	0.00413767
ENSMUST00000038406	ENSMUSG00000029762	Akr1b8	chr6:34354118-34368463	24.7462	11.0934	1.1575	5e-05	0.00413767
ENSMUST00000025561	ENSMUSG00000024659	Anxa1	chr19:20373427-20390944	245.345	109.95	1.15797	5e-05	0.00413767
ENSMUST00000072329	ENSMUSG00000057531	Dtnbp1	chr13:44922078-45002096	35.1248	15.7344	1.15857	5e-05	0.00413767
ENSMUST00000105502	ENSMUSG00000048756	Foxo3	chr10:42181840-42276755	57.1789	25.609	1.15883	5e-05	0.00413767
ENSMUST00000169593	ENSMUSG00000037638	Zbtb42	chr12:112678827-112682747	9.76601	4.37363	1.15894	5e-05	0.00413767
ENSMUST00000020484	ENSMUSG00000020250	Txnrd1	chr10:82859205-82897724	56.4484	25.2507	1.16061	5e-05	0.00413767
ENSMUST00000043873	ENSMUSG00000064057	Scgb3a1	chr11:49663609-49665118	1264.3	565.379	1.16105	5e-05	0.00413767
ENSMUST00000167824	ENSMUSG00000021700	Rab3c	chr13:110054186-110280206	1.78725	0.799	1.16147	0.0002	0.0133323
ENSMUST00000098644	ENSMUSG00000053198	Prx	chr7:27499323-27520214	72.3931	32.3349	1.16276	0.0001	0.00752154
ENSMUST00000001046	ENSMUSG00000001020	S100a4	chr3:90603770-90606045	103.674	46.2694	1.16392	0.0001	0.00752154
ENSMUST00000065335	ENSMUSG00000053101	Gpr141	chr13:19749681-19824257	4.48356	2.00052	1.16427	0.00035	0.0211828
ENSMUST00000101029	ENSMUSG00000037679	Inf2	chr12:112588783-112615556	18.5058	8.23087	1.16886	5e-05	0.00413767
ENSMUST00000024897	ENSMUSG00000024091	Vapa	chr17:65580055-65613555	165.9	73.7352	1.16989	5e-05	0.00413767
ENSMUST00000050004	ENSMUSG00000033107	Rnf125	chr18:20944624-20983848	24.3889	10.8243	1.17195	5e-05	0.00413767
ENSMUST00000020339	ENSMUSG00000020130	Tbc1d15	chr10:115197876-115251493	38.9524	17.284	1.17228	5e-05	0.00413767
ENSMUST00000090839	ENSMUSG00000068874	Selenbp1	chr3:94933055-94944758	585.589	259.488	1.17422	5e-05	0.00413767
ENSMUST00000020804	ENSMUSG00000061666	Gdpd1	chr11:87033866-87074062	29.4367	13.0205	1.17683	5e-05	0.00413767
ENSMUST00000006614	ENSMUSG00000006445	Epha2	chr4:141301239-141329384	33.3972	14.7687	1.17718	5e-05	0.00413767
ENSMUST00000071233	ENSMUSG00000058881	Zfp516	chr18:82910878-83005314	16.6533	7.36057	1.17792	0.0001	0.00752154
ENSMUST00000119109	ENSMUSG00000003382	Etv3	chr3:87525406-87540156	11.0875	4.89867	1.17847	0.001	0.0477064
ENSMUST00000204087	ENSMUSG00000051343	Rab11fip5	chr6:85334961-85374634	6.70782	2.96361	1.17849	0.0008	0.0401414
ENSMUST00000102964	ENSMUSG00000060093	Hist1h4a	chr13:23760691-23761230	81.8343	36.0789	1.18155	5e-05	0.00413767
ENSMUST00000077196	ENSMUSG00000037185	Krt80	chr15:101349570-101370125	78.8588	34.681	1.18512	5e-05	0.00413767
ENSMUST00000112231	ENSMUSG00000048120	Entpd1	chr19:40612396-40741602	64.2112	28.2167	1.18628	5e-05	0.00413767
ENSMUST00000197679	ENSMUSG00000027947	Il6ra	chr3:89864058-89913196	11.5794	5.08579	1.18701	5e-05	0.00413767
ENSMUST00000030724	ENSMUSG00000028893	Sesn2	chr4:132492031-132510501	11.8509	5.20104	1.18812	5e-05	0.00413767
ENSMUST00000029053	ENSMUSG00000027540	Ptpn1	chr2:167932326-167979385	40.8778	17.9367	1.18841	5e-05	0.00413767
ENSMUST00000025270	ENSMUSG00000024404	Riok3	chr18:12128849-12157367	54.9047	24.0885	1.18859	5e-05	0.00413767
ENSMUST00000060719	ENSMUSG00000044583	Tlr7	chrX:167304928-167330558	8.58255	3.76514	1.1887	0.00025	0.016035
ENSMUST00000017851	ENSMUSG00000017707	Serinc3	chr2:163623271-163645131	539.326	236.084	1.19186	0.0001	0.00752154
ENSMUST00000023531	ENSMUSG00000022831	Hcls1	chr16:36934982-36963212	26.8642	11.7462	1.19349	0.0001	0.00752154
ENSMUST00000044019	ENSMUSG00000030089	Slc41a3	chr6:90604724-90646412	5.13211	2.24053	1.19571	0.0009	0.0440307
ENSMUST00000120135	ENSMUSG00000021457	Syk	chr13:52583172-52648792	17.0945	7.44939	1.19834	0.0002	0.0133323
ENSMUST00000045075	ENSMUSG00000034641	Cd300ld	chr11:114982273-114989922	6.1749	2.68951	1.19907	0.0002	0.0133323
ENSMUST00000031224	ENSMUSG00000029287	Tgfbr3	chr5:107106569-107289629	78.1213	33.9962	1.20034	5e-05	0.00413767
ENSMUST00000082432	ENSMUSG00000007682	Dio2	chr12:90724553-90738438	1.33729	0.581816	1.20067	0.0009	0.0440307
ENSMUST00000102564	ENSMUSG00000060216	Arrb2	chr11:70432636-70440828	19.9262	8.66473	1.20144	0.00015	0.0105044
ENSMUST00000040498	ENSMUSG00000036492	Rnf39	chr17:36942917-36947986	9.11302	3.9627	1.20145	0.0002	0.0133323
ENSMUST00000043414	ENSMUSG00000036661	Dennd3	chr15:73512559-73572242	54.2224	23.5652	1.20223	5e-05	0.00413767
ENSMUST00000042970	ENSMUSG00000041695	Kcnj2	chr11:111066163-111076821	18.8016	8.17079	1.20231	5e-05	0.00413767
ENSMUST00000035010	ENSMUSG00000032437	Stt3b	chr9:115242580-115310421	104.804	45.4877	1.20415	5e-05	0.00413767
ENSMUST00000070080	ENSMUSG00000056124	B4galt6	chr18:20684598-20746404	3.28548	1.42496	1.20519	0.0002	0.0133323
ENSMUST00000013851	ENSMUSG00000013707	Tnfaip8l2	chr3:95139520-95142360	12.1844	5.2665	1.21012	0.00045	0.0259452
ENSMUST00000029071	ENSMUSG00000027555	Car13	chr3:14641726-14663002	5.07276	2.19186	1.21062	0.0004	0.0235705
ENSMUST00000021077	ENSMUSG00000020733	Slc9a3r1	chr11:115163340-115181181	52.2402	22.5588	1.21147	5e-05	0.00413767
ENSMUST00000078222	ENSMUSG00000000308	Ckmt1	chr2:121357713-121380940	13.2745	5.71622	1.21552	5e-05	0.00413767
ENSMUST00000100572	ENSMUSG00000022372	Sla	chr15:66670752-66850721	14.0738	6.05987	1.21565	0.0008	0.0401414
ENSMUST00000168621	ENSMUSG00000025314	Ptprj	chr2:90429755-90580647	47.8912	20.5732	1.219	5e-05	0.00413767
ENSMUST00000042726	ENSMUSG00000036733	Rbm42	chr7:30640998-30664994	27.4274	11.7745	1.21995	0.00055	0.0301111
ENSMUST00000034378	ENSMUSG00000031904	Slc7a6	chr8:106168856-106198706	12.6305	5.41966	1.22064	5e-05	0.00413767
ENSMUST00000067124	ENSMUSG00000020593	Lpin1	chr12:16535668-16589770	12.3123	5.28111	1.22119	0.00075	0.0382387
ENSMUST00000063694	ENSMUSG00000052040	Klf13	chr7:63886350-63938915	91.7372	39.3319	1.22181	5e-05	0.00413767
ENSMUST00000041388	ENSMUSG00000037411	Serpine1	chr5:137061503-137072259	20.953	8.97648	1.22293	5e-05	0.00413767
ENSMUST00000106305	ENSMUSG00000017132	Cyth1	chr11:118132018-118248592	23.1193	9.89807	1.22388	5e-05	0.00413767
ENSMUST00000033049	ENSMUSG00000030785	Cox6a2	chr7:128154375-128223816	29.6218	12.6789	1.22423	0.0002	0.0133323
ENSMUST00000034522	ENSMUSG00000032024	Clmp	chr9:40686011-40785319	5.58582	2.39007	1.22472	0.0002	0.0133323
ENSMUST00000079323	ENSMUSG00000032776	Mctp2	chr7:72077829-72306608	5.1603	2.20066	1.22952	5e-05	0.00413767
ENSMUST00000067638	ENSMUSG00000054520	Sh3bp2	chr5:34525837-34563641	6.93093	2.9552	1.22979	0.00105	0.0494336
ENSMUST00000048946	ENSMUSG00000037960	Card19	chr13:49202950-49216026	35.4801	15.1232	1.23025	5e-05	0.00413767
ENSMUST00000043214	ENSMUSG00000033220	Rac2	chr15:78559168-78572783	26.3617	11.2259	1.23162	5e-05	0.00413767
ENSMUST00000023189	ENSMUSG00000022536	Glyr1	chr16:5013905-5049910	22.8348	9.68785	1.23699	0.00105	0.0494336
ENSMUST00000075072	ENSMUSG00000021886	Gpr65	chr12:98268634-98276624	5.64482	2.39309	1.23805	0.0003	0.0186561
ENSMUST00000042135	ENSMUSG00000004952	Rasa4	chr5:136083915-136111860	5.88037	2.48813	1.24084	0.00015	0.0105044
ENSMUST00000052413	ENSMUSG00000002699	Lcp2	chr11:33973960-34098554	9.59606	4.05265	1.24358	5e-05	0.00413767
ENSMUST00000029433	ENSMUSG00000027843	Ptpn22	chr3:103860276-103912247	7.42492	3.13298	1.24484	0.0001	0.00752154
ENSMUST00000038863	ENSMUSG00000035202	Lars2	chr9:123366926-123462664	66.0706	27.8697	1.24531	5e-05	0.00413767
ENSMUST00000100052	ENSMUSG00000033581	Igf2bp2	chr16:22059008-22163299	9.32875	3.93328	1.24595	5e-05	0.00413767
ENSMUST00000024866	ENSMUSG00000024066	Xdh	chr17:73883907-73950182	133.481	56.0634	1.2515	5e-05	0.00413767
ENSMUST00000026170	ENSMUSG00000025171	Ubtd1	chr19:41981762-42034641	12.8255	5.38678	1.25153	5e-05	0.00413767
ENSMUST00000030010	ENSMUSG00000015243	Abca1	chr4:53030786-53159895	62.9494	26.434	1.2518	5e-05	0.00413767
ENSMUST00000047321	ENSMUSG00000055116	Arntl	chr7:113207464-113314126	6.98496	2.93172	1.2525	0.0001	0.00752154
ENSMUST00000090461	ENSMUSG00000022148	Fyb	chr15:6579870-6663304	20.3703	8.54666	1.25303	5e-05	0.00413767
ENSMUST00000033414	ENSMUSG00000031089	Slc6a14	chrX:21714895-21742355	82.271	34.4891	1.25425	5e-05	0.00413767
ENSMUST00000042610	ENSMUSG00000073490	Ifi207	chr1:173723429-173741809	7.72881	3.23493	1.25651	5e-05	0.00413767
ENSMUST00000038569	ENSMUSG00000037211	Spry1	chr3:37639946-37644598	41.3417	17.2992	1.25689	0.00085	0.0421601
ENSMUST00000034552	ENSMUSG00000032051	Fdx1	chr9:51943305-51963556	70.4485	29.3998	1.26077	0.0006	0.0322352
ENSMUST00000090952	ENSMUSG00000036053	Fmnl2	chr2:52857859-53134202	20.9235	8.71343	1.26381	0.00025	0.016035
ENSMUST00000009058	ENSMUSG00000028970	Abcb1b	chr5:8798185-8866315	2.2843	0.949545	1.26644	0.00025	0.016035
ENSMUST00000052125	ENSMUSG00000044641	Pard6b	chr2:168081003-168101203	60.2286	25.0275	1.26694	5e-05	0.00413767
ENSMUST00000058845	ENSMUSG00000045763	Basp1	chr15:25363284-25413764	14.4629	6.00595	1.2679	5e-05	0.00413767
ENSMUST00000034834	ENSMUSG00000032294	Pkm	chr9:59656367-59679375	215.512	89.0456	1.27515	5e-05	0.00413767
ENSMUST00000050687	ENSMUSG00000034271	Jdp2	chr12:85599104-85639878	26.0494	10.7609	1.27545	5e-05	0.00413767
ENSMUST00000031694	ENSMUSG00000029683	Lmod2	chr6:24597761-24605414	5.04216	2.07935	1.27791	0.00035	0.0211828
ENSMUST00000050027	ENSMUSG00000037362	Nov	chr15:54745701-54754039	8.43501	3.47801	1.27813	0.00015	0.0105044
ENSMUST00000018965	ENSMUSG00000018821	Avpi1	chr19:42123272-42129059	42.9138	17.6899	1.27852	5e-05	0.00413767
ENSMUST00000161804	ENSMUSG00000029673	Auts2	chr5:131437787-131616605	4.30053	1.76921	1.28141	0.0002	0.0133323
ENSMUST00000025904	ENSMUSG00000024953	Prdx5	chr19:6906705-6921808	94.868	38.8443	1.28822	0.0003	0.0186561
ENSMUST00000062069	ENSMUSG00000047250	Ptgs1	chr2:36230425-36252272	58.5708	23.9505	1.29013	5e-05	0.00413767
ENSMUST00000024894	ENSMUSG00000024087	Cyp1b1	chr17:79706952-79715041	8.25841	3.37699	1.29013	0.0001	0.00752154
ENSMUST00000033001	ENSMUSG00000030747	Dgat2	chr7:99153657-99182719	13.6723	5.58194	1.29242	5e-05	0.00413767
ENSMUST00000121288	ENSMUSG00000035095	Fam167a	chr14:63436393-63465498	13.5451	5.52868	1.29276	5e-05	0.00413767
ENSMUST00000036854	ENSMUSG00000040659	Efhd2	chr4:141858141-141874920	68.6863	28.0065	1.29426	5e-05	0.00413767
ENSMUST00000038368	ENSMUSG00000042745	Id1	chr2:152736250-152737410	165.69	67.5059	1.2954	5e-05	0.00413767
ENSMUST00000094245	ENSMUSG00000070473	Cldn3	chr5:134986213-135001350	125.671	51.2002	1.29543	5e-05	0.00413767
ENSMUST00000114573	ENSMUSG00000034908	Sidt2	chr9:45937856-45955258	21.462	8.74314	1.29556	0.0006	0.0322352
ENSMUST00000072438	ENSMUSG00000030483	Cyp2b10	chr7:25897619-25926624	403.793	164.341	1.29692	5e-05	0.00413767
ENSMUST00000034017	ENSMUSG00000031605	Klhl2	chr8:64739674-64850017	25.1013	10.2152	1.29705	5e-05	0.00413767
ENSMUST00000060050	ENSMUSG00000050105	Grrp1	chr4:134251109-134254106	23.6086	9.5938	1.29914	5e-05	0.00413767
ENSMUST00000169754	ENSMUSG00000026288	Inpp5d	chr1:87620311-87720507	21.967	8.92386	1.2996	5e-05	0.00413767
ENSMUST00000001513	ENSMUSG00000001473	Tubb6	chr18:67390716-67402748	18.0756	7.34013	1.30016	5e-05	0.00413767
ENSMUST00000027012	ENSMUSG00000033538	Casp4	chr9:5308827-5336783	16.1912	6.56193	1.30301	0.0001	0.00752154
ENSMUST00000061328	ENSMUSG00000045314	Sowahb	chr5:93041122-93045022	3.33745	1.3526	1.30301	0.0002	0.0133323
ENSMUST00000062356	ENSMUSG00000047945	Marcksl1	chr4:129513580-129515985	31.1795	12.5406	1.314	5e-05	0.00413767
ENSMUST00000067912	ENSMUSG00000055148	Klf2	chr8:72319032-72321656	190.54	76.5643	1.31535	5e-05	0.00413767
ENSMUST00000047168	ENSMUSG00000041119	Pde9a	chr17:31386233-31476310	28.7212	11.4965	1.32092	5e-05	0.00413767
ENSMUST00000095267	ENSMUSG00000071076	Jund	chr8:70698948-70700616	119.508	47.7612	1.3232	5e-05	0.00413767
ENSMUST00000054801	ENSMUSG00000046828	Mettl21e	chr1:44204069-44218961	3.86507	1.54063	1.32697	0.00015	0.0105044
ENSMUST00000071250	ENSMUSG00000021069	Pygl	chr12:70190810-70234165	38.2001	15.2143	1.32815	5e-05	0.00413767
ENSMUST00000025601	ENSMUSG00000024696	Lpxn	chr19:12798605-12833807	7.24461	2.87776	1.33196	0.00015	0.0105044
ENSMUST00000171808	ENSMUSG00000002297	Dbf4	chr5:8396972-8422716	7.04966	2.79405	1.33519	0.0001	0.00752154
ENSMUST00000029046	ENSMUSG00000027533	Fabp5	chr3:10012547-10016607	202.859	80.3788	1.33559	5e-05	0.00413767
ENSMUST00000038038	ENSMUSG00000072620	Slfn2	chr11:83065111-83071246	52.3109	20.7066	1.33702	5e-05	0.00413767
ENSMUST00000081964	ENSMUSG00000059325	Hopx	chr5:77086987-77115121	548.042	216.818	1.3378	0.0002	0.0133323
ENSMUST00000092464	ENSMUSG00000044811	Cd300c2	chr11:114996720-115001880	14.533	5.73716	1.34092	0.00015	0.0105044
ENSMUST00000023132	ENSMUSG00000022489	Pde1b	chr15:103503297-103530052	7.43313	2.92922	1.34345	5e-05	0.00413767
ENSMUST00000169035	ENSMUSG00000039782	Cpeb2	chr5:43151685-43289724	5.35972	2.1066	1.34724	0.0007	0.0362738
ENSMUST00000020655	ENSMUSG00000020387	Jade2	chr11:51813454-51857653	23.9416	9.40779	1.34759	5e-05	0.00413767
ENSMUST00000019974	ENSMUSG00000019832	Rab32	chr10:10545010-10558233	15.9093	6.24899	1.34818	5e-05	0.00413767
ENSMUST00000178124	ENSMUSG00000096606	Tpbgl	chr7:99624081-99627103	2.14863	0.843403	1.34912	0.00045	0.0259452
ENSMUST00000129635	ENSMUSG00000024052	Lpin2	chr17:71183555-71249817	86.241	33.8043	1.35117	5e-05	0.00413767
ENSMUST00000022663	ENSMUSG00000022074	Tnfrsf10b	chr14:69767471-69784403	6.42537	2.50765	1.35744	5e-05	0.00413767
ENSMUST00000032194	ENSMUSG00000030103	Bhlhe40	chr6:108660628-108666925	47.1347	18.3811	1.35856	5e-05	0.00413767
ENSMUST00000033054	ENSMUSG00000030790	Adm	chr7:110627660-110629820	8.96517	3.49354	1.35964	0.0001	0.00752154
ENSMUST00000057569	ENSMUSG00000046908	Ltb4r1	chr14:55765961-55768494	4.74962	1.84763	1.36214	0.00065	0.0342624
ENSMUST00000202622	ENSMUSG00000040731	Eif4h	chr5:134619720-134639490	75.366	29.3021	1.36291	0.00105	0.0494336
ENSMUST00000038765	ENSMUSG00000037035	Inhbb	chr1:119415464-119422248	13.9445	5.41879	1.36365	5e-05	0.00413767
ENSMUST00000058897	ENSMUSG00000046245	Pilra	chr5:137787797-137836281	9.35141	3.63213	1.36437	5e-05	0.00413767
ENSMUST00000031401	ENSMUSG00000029449	Rhof	chr5:123076274-123132692	8.62615	3.34698	1.36586	0.00095	0.0458858
ENSMUST00000022881	ENSMUSG00000022270	Fam134b	chr15:25843263-25973687	64.4021	24.9146	1.37012	5e-05	0.00413767
ENSMUST00000031455	ENSMUSG00000029490	Mfsd7a	chr5:108441053-108448891	2.89342	1.11877	1.37086	0.00035	0.0211828
ENSMUST00000022791	ENSMUSG00000022184	Fbxo4	chr15:3965444-3979573	22.8229	8.80241	1.37451	5e-05	0.00413767
ENSMUST00000021933	ENSMUSG00000021477	Ctsl	chr13:64363213-64370306	227.098	87.2388	1.38027	5e-05	0.00413767
ENSMUST00000100816	ENSMUSG00000018076	Med13l	chr5:118560718-118765438	38.6092	14.82	1.3814	5e-05	0.00413767
ENSMUST00000023225	ENSMUSG00000022564	Grina	chr15:76246806-76249904	113.895	43.6136	1.38486	5e-05	0.00413767
ENSMUST00000211648	ENSMUSG00000046794	Ppp1r3b	chr8:35375738-35388139	5.12615	1.95989	1.3871	0.00035	0.0211828
ENSMUST00000034285	ENSMUSG00000031827	Cotl1	chr8:119809221-119840544	73.6493	28.1057	1.38981	5e-05	0.00413767
ENSMUST00000034497	ENSMUSG00000043613	Mmp3	chr9:7445821-7455975	26.0265	9.91362	1.3925	5e-05	0.00413767
ENSMUST00000076859	ENSMUSG00000028680	Plk3	chr4:117126793-117133963	7.43394	2.83004	1.3933	0.0003	0.0186561
ENSMUST00000100874	ENSMUSG00000048163	Selplg	chr5:113818535-113832644	41.7182	15.8726	1.39414	5e-05	0.00413767
ENSMUST00000126534	ENSMUSG00000033685	Ucp2	chr7:100493336-100514960	125.381	47.6689	1.3952	0.0001	0.00752154
ENSMUST00000025078	ENSMUSG00000024235	Map3k8	chr18:4331326-4352953	18.3582	6.96439	1.39836	5e-05	0.00413767
ENSMUST00000118875	ENSMUSG00000057666	Gapdh	chr6:125161852-125166467	173.971	65.9076	1.40033	5e-05	0.00413767
ENSMUST00000170089	ENSMUSG00000015053	Gata2	chr6:88193890-88207032	62.9932	23.833	1.40224	5e-05	0.00413767
ENSMUST00000031835	ENSMUSG00000029811	Aoc1	chr6:48872895-48909188	1.92508	0.72779	1.40332	0.00095	0.0458858
ENSMUST00000067543	ENSMUSG00000032501	Trib1	chr15:59648349-59656550	28.4471	10.7483	1.40418	5e-05	0.00413767
ENSMUST00000044195	ENSMUSG00000042246	Tmc7	chr7:118535840-118584736	1.99672	0.753913	1.40516	5e-05	0.00413767
ENSMUST00000046520	ENSMUSG00000038074	Fkbp14	chr6:54577603-54645839	15.0395	5.67086	1.40712	0.0005	0.0280447
ENSMUST00000051293	ENSMUSG00000044197	Gpr146	chr5:139359738-139460527	52.3418	19.7066	1.40928	5e-05	0.00413767
ENSMUST00000148314	ENSMUSG00000087006	Gm13889	chr2:93955809-94010807	68.9934	25.9548	1.41045	5e-05	0.00413767
ENSMUST00000022744	ENSMUSG00000022144	Gdnf	chr15:7811010-7837575	6.13365	2.30721	1.4106	5e-05	0.00413767
ENSMUST00000053640	ENSMUSG00000045730	Adrb2	chr18:62177816-62179959	107.3	40.2992	1.41283	5e-05	0.00413767
ENSMUST00000022682	ENSMUSG00000022091	Sorbs3	chr14:70180467-70217659	102.44	38.4357	1.41425	5e-05	0.00413767
ENSMUST00000161976	ENSMUSG00000022346	Myc	chr15:61985390-61990374	5.87537	2.20396	1.41458	0.0006	0.0322352
ENSMUST00000065587	ENSMUSG00000044337	Ackr3	chr1:90203979-90216751	34.1187	12.7819	1.41646	5e-05	0.00413767
ENSMUST00000100377	ENSMUSG00000058099	Nfam1	chr15:82997720-83033306	20.557	7.61344	1.43301	5e-05	0.00413767
ENSMUST00000105365	ENSMUSG00000045193	Cirbp	chr10:80165984-80172786	109.854	40.6421	1.43454	5e-05	0.00413767
ENSMUST00000076212	ENSMUSG00000032724	Abtb2	chr2:103566309-103718423	5.98461	2.21268	1.43546	5e-05	0.00413767
ENSMUST00000109838	ENSMUSG00000055254	Ntrk2	chr13:58806595-59133970	8.7267	3.22235	1.43732	5e-05	0.00413767
ENSMUST00000026381	ENSMUSG00000025330	Padi4	chr4:140745864-140774236	2.48529	0.917233	1.43805	0.00045	0.0259452
ENSMUST00000013949	ENSMUSG00000032000	Birc3	chr9:7848698-7873186	41.0995	15.1342	1.44131	5e-05	0.00413767
ENSMUST00000058839	ENSMUSG00000043008	Klhl6	chr16:19946498-19983037	19.215	7.07434	1.44157	5e-05	0.00413767
ENSMUST00000053459	ENSMUSG00000021411	Pxdc1	chr13:34627839-34652671	114.895	42.18	1.44569	5e-05	0.00413767
ENSMUST00000020702	ENSMUSG00000020427	Igfbp3	chr11:7206085-7213923	40.2771	14.7837	1.44596	5e-05	0.00413767
ENSMUST00000115365	ENSMUSG00000079659	Tmem243	chr5:9100746-9161776	171.962	63.0819	1.44679	5e-05	0.00413767
ENSMUST00000057311	ENSMUSG00000047281	Sfn	chr4:133600555-133602168	25.9823	9.5238	1.44792	5e-05	0.00413767
ENSMUST00000043378	ENSMUSG00000039886	Tmem120a	chr5:135735484-135744448	16.259	5.95947	1.44798	5e-05	0.00413767
ENSMUST00000025691	ENSMUSG00000024778	Fas	chr19:34290658-34327770	58.2926	21.3509	1.44901	5e-05	0.00413767
ENSMUST00000114458	ENSMUSG00000035356	Nfkbiz	chr16:55811374-55838899	30.0473	11.0003	1.4497	5e-05	0.00413767
ENSMUST00000005889	ENSMUSG00000034116	Vav1	chr17:57279099-57328031	16.5121	6.03082	1.4531	5e-05	0.00413767
ENSMUST00000075884	ENSMUSG00000063011	Msln	chr17:25748613-25754327	66.9813	24.4518	1.45382	5e-05	0.00413767
ENSMUST00000052602	ENSMUSG00000050390	C77080	chr4:129189759-129261404	35.3334	12.8965	1.45405	5e-05	0.00413767
ENSMUST00000056950	ENSMUSG00000044456	Rin3	chr12:102283047-102390855	60.9559	22.1339	1.46151	5e-05	0.00413767
ENSMUST00000005077	ENSMUSG00000004951	Hspb1	chr5:135887918-135889563	141.259	51.2857	1.46171	5e-05	0.00413767
ENSMUST00000014118	ENSMUSG00000013974	Mcemp1	chr8:3665753-3669259	20.6087	7.45121	1.4677	5e-05	0.00413767
ENSMUST00000191251	ENSMUSG00000026018	Ica1l	chr1:59989067-60043122	4.08162	1.47299	1.47039	5e-05	0.00413767
ENSMUST00000076587	ENSMUSG00000026064	Ptp4a1	chr1:30940301-30949770	147.276	53.0765	1.47237	5e-05	0.00413767
ENSMUST00000026972	ENSMUSG00000025854	Fam20c	chr5:138754513-138810077	8.27274	2.98132	1.47241	5e-05	0.00413767
ENSMUST00000095109	ENSMUSG00000071001	Hrct1	chr4:43727187-43728639	7.86101	2.83234	1.47272	5e-05	0.00413767
ENSMUST00000055738	ENSMUSG00000031431	Tsc22d3	chrX:140539527-140600659	267.291	95.783	1.48057	5e-05	0.00413767
ENSMUST00000054483	ENSMUSG00000046688	Tifa	chr3:127789804-127798389	8.6005	3.08154	1.48077	0.0002	0.0133323
ENSMUST00000035672	ENSMUSG00000039457	Ppl	chr16:5086290-5132481	51.4131	18.4131	1.4814	5e-05	0.00413767
ENSMUST00000047906	ENSMUSG00000034640	Tiparp	chr3:65528409-65555518	42.9706	15.3769	1.48259	5e-05	0.00413767
ENSMUST00000027952	ENSMUSG00000026640	Plxna2	chr1:194619824-194816869	35.1382	12.557	1.48456	5e-05	0.00413767
ENSMUST00000053536	ENSMUSG00000041598	Cdc42ep4	chr11:113726849-113751881	79.919	28.4102	1.49213	5e-05	0.00413767
ENSMUST00000110005	ENSMUSG00000001768	Rin2	chr2:145784733-145893903	54.8488	19.4663	1.49448	0.0001	0.00752154
ENSMUST00000050467	ENSMUSG00000048546	Tob2	chr15:81848269-81858326	41.6963	14.7757	1.49669	5e-05	0.00413767
ENSMUST00000048653	ENSMUSG00000034361	Cpne2	chr8:94532989-94570531	10.3411	3.64989	1.50246	5e-05	0.00413767
ENSMUST00000115621	ENSMUSG00000031167	Rbm3	chrX:8138977-8147964	106.453	37.4945	1.50547	0.00035	0.0211828
ENSMUST00000112682	ENSMUSG00000004902	Slc25a18	chr6:120773577-120794336	3.36902	1.1851	1.50732	0.00045	0.0259452
ENSMUST00000040514	ENSMUSG00000038894	Irs2	chr8:10984680-11008458	31.4084	11.0195	1.5111	5e-05	0.00413767
ENSMUST00000032376	ENSMUSG00000057604	Lmcd1	chr6:112273757-112330425	32.0569	11.2457	1.51127	5e-05	0.00413767
ENSMUST00000109428	ENSMUSG00000074607	Tox2	chr2:163203124-163324170	17.3795	6.09247	1.51228	5e-05	0.00413767
ENSMUST00000020271	ENSMUSG00000020077	Srgn	chr10:62493832-62527451	278.522	97.6237	1.51249	5e-05	0.00413767
ENSMUST00000036991	ENSMUSG00000041548	Hspb8	chr5:116408490-116422864	55.9259	19.5635	1.51536	5e-05	0.00413767
ENSMUST00000110320	ENSMUSG00000042851	Zc3h6	chr2:128966592-129021756	10.9461	3.82304	1.51763	5e-05	0.00413767
ENSMUST00000122232	ENSMUSG00000030530	Furin	chr7:80389193-80405436	70.5457	24.5535	1.52263	5e-05	0.00413767
ENSMUST00000081035	ENSMUSG00000046805	Mpeg1	chr19:12460778-12465284	127.189	44.254	1.5231	0.0001	0.00752154
ENSMUST00000006235	ENSMUSG00000021939	Ctsb	chr14:63122461-63177793	195.847	68.1255	1.52346	0.00015	0.0105044
ENSMUST00000187690	ENSMUSG00000034595	Ppp1r18	chr17:35860917-35875596	21.5514	7.48752	1.52522	0.00075	0.0382387
ENSMUST00000080418	ENSMUSG00000024589	Nedd4l	chr18:64887755-65217826	11.8317	4.10915	1.52575	0.00035	0.0211828
ENSMUST00000030202	ENSMUSG00000028480	Glipr2	chr4:43957400-43979118	17.4715	6.05994	1.52763	5e-05	0.00413767
ENSMUST00000014917	ENSMUSG00000014773	Dll1	chr17:15367353-15379475	20.1883	6.98512	1.53116	5e-05	0.00413767
ENSMUST00000015138	ENSMUSG00000029675	Eln	chr5:134702592-134822967	202.703	70.1224	1.53142	5e-05	0.00413767
ENSMUST00000037994	ENSMUSG00000078763	Slfn1	chr11:83116848-83122670	12.5531	4.33921	1.53254	5e-05	0.00413767
ENSMUST00000151120	ENSMUSG00000007891	Ctsd	chr7:142326109-142388038	509.835	175.826	1.53588	5e-05	0.00413767
ENSMUST00000138302	ENSMUSG00000047731	Wbp1l	chr19:46599083-46657389	17.0091	5.85584	1.53836	0.00045	0.0259452
ENSMUST00000028838	ENSMUSG00000027360	Hdc	chr2:126593666-126618678	38.9732	13.4126	1.5389	5e-05	0.00413767
ENSMUST00000037798	ENSMUSG00000034452	Slc24a1	chr9:64922860-64951607	0.758964	0.261083	1.53952	0.0003	0.0186561
ENSMUST00000062108	ENSMUSG00000042349	Ikbke	chr1:131254596-131279606	9.62147	3.2984	1.54449	5e-05	0.00413767
ENSMUST00000081440	ENSMUSG00000030340	Scnn1a	chr6:125320658-125344943	253.221	86.7097	1.54613	5e-05	0.00413767
ENSMUST00000115262	ENSMUSG00000075705	Msrb1	chr17:24736641-24742778	124.753	42.6393	1.54882	5e-05	0.00413767
ENSMUST00000054098	ENSMUSG00000044026	Slc35g1	chr19:38395979-38405607	4.42	1.50716	1.55221	5e-05	0.00413767
ENSMUST00000164016	ENSMUSG00000025509	Pnpla2	chr7:141455197-141460743	61.5931	20.9605	1.5551	5e-05	0.00413767
ENSMUST00000106040	ENSMUSG00000025491	Ifitm1	chr7:140967220-140969825	149.097	50.7336	1.55524	5e-05	0.00413767
ENSMUST00000038753	ENSMUSG00000040711	Sh3pxd2b	chr11:32347819-32428173	16.7184	5.68305	1.5567	5e-05	0.00413767
ENSMUST00000027754	ENSMUSG00000026480	Ncf2	chr1:152800193-152836991	22.8434	7.70331	1.56823	5e-05	0.00413767
ENSMUST00000057243	ENSMUSG00000048572	Tmem252	chr19:24674007-24679661	19.1425	6.45321	1.56869	5e-05	0.00413767
ENSMUST00000215619	ENSMUSG00000096472	Cdkn2d	chr9:21288409-21291407	20.7347	6.9724	1.57232	5e-05	0.00413767
ENSMUST00000165310	ENSMUSG00000079419	Ms4a6c	chr19:11469365-11484578	12.2642	4.11146	1.57673	5e-05	0.00413767
ENSMUST00000111275	ENSMUSG00000015950	Ncf1	chr5:134220259-134229625	33.4571	11.1782	1.58162	5e-05	0.00413767
ENSMUST00000059206	ENSMUSG00000032322	Pstpip1	chr9:56089961-56128888	8.8449	2.94535	1.58641	5e-05	0.00413767
ENSMUST00000097981	ENSMUSG00000073802	Cdkn2b	chr4:89306288-89311032	47.6268	15.8424	1.58798	5e-05	0.00413767
ENSMUST00000165205	ENSMUSG00000090958	Lrrc32	chr7:98489282-98502181	38.2775	12.7161	1.58984	5e-05	0.00413767
ENSMUST00000002180	ENSMUSG00000002111	Spi1	chr2:91082389-91115756	24.3686	8.09301	1.59027	5e-05	0.00413767
ENSMUST00000171347	ENSMUSG00000074874	Ctla2b	chr13:60895350-60897447	16.7317	5.53512	1.5959	5e-05	0.00413767
ENSMUST00000034846	ENSMUSG00000032300	1700017B05Rik	chr9:57253116-57262612	17.9834	5.9434	1.59731	5e-05	0.00413767
ENSMUST00000005651	ENSMUSG00000005514	Por	chr5:135670032-135735326	231.97	76.5851	1.5988	5e-05	0.00413767
ENSMUST00000102881	ENSMUSG00000020120	Plek	chr11:16971205-17079371	55.7165	18.3551	1.60192	5e-05	0.00413767
ENSMUST00000113314	ENSMUSG00000029273	Sult1d1	chr5:87554644-87569027	24.9054	8.20363	1.60212	5e-05	0.00413767
ENSMUST00000018287	ENSMUSG00000018143	Mafk	chr5:139791512-139826885	51.1807	16.8525	1.60264	5e-05	0.00413767
ENSMUST00000207225	ENSMUSG00000039361	Picalm	chr7:90130212-90213465	68.1974	22.4376	1.6038	0.0005	0.0280447
ENSMUST00000032501	ENSMUSG00000030351	Tspan11	chr6:127887588-127953977	27.0359	8.87737	1.60667	5e-05	0.00413767
ENSMUST00000048860	ENSMUSG00000039395	Mreg	chr1:72159441-72212307	4.38759	1.43978	1.60758	5e-05	0.00413767
ENSMUST00000021693	ENSMUSG00000021265	Slc25a29	chr12:108825872-108835883	9.20954	3.01901	1.60905	5e-05	0.00413767
ENSMUST00000117507	ENSMUSG00000028108	Ecm1	chr3:95734146-95739569	78.2686	25.6254	1.61086	5e-05	0.00413767
ENSMUST00000161576	ENSMUSG00000031770	Herpud1	chr8:94377920-94395377	177.027	57.9376	1.61139	5e-05	0.00413767
ENSMUST00000015712	ENSMUSG00000015568	Lpl	chr8:68880490-68906934	117.278	38.355	1.61245	5e-05	0.00413767
ENSMUST00000030693	ENSMUSG00000028874	Fgr	chr4:132974101-133001910	16.0977	5.2637	1.6127	5e-05	0.00413767
ENSMUST00000025646	ENSMUSG00000024737	Slc15a3	chr19:10842543-10869940	18.6405	6.08746	1.61453	5e-05	0.00413767
ENSMUST00000097336	ENSMUSG00000073412	Lst1	chr17:35185094-35188439	48.488	15.8315	1.61483	0.0001	0.00752154
ENSMUST00000030408	ENSMUSG00000028655	Mfsd2a	chr4:122946849-122961188	4.02439	1.31281	1.61611	5e-05	0.00413767
ENSMUST00000106112	ENSMUSG00000078566	Bnip3	chr7:138890835-138909506	54.9349	17.9141	1.61663	5e-05	0.00413767
ENSMUST00000042771	ENSMUSG00000035673	Sbno2	chr10:80057415-80102698	40.1538	13.0633	1.62002	5e-05	0.00413767
ENSMUST00000114239	ENSMUSG00000022876	Samsn1	chr16:75858792-76022270	19.0137	6.18193	1.62091	5e-05	0.00413767
ENSMUST00000057262	ENSMUSG00000047330	Kcne4	chr1:78816757-78820028	8.99765	2.92407	1.62157	5e-05	0.00413767
ENSMUST00000028950	ENSMUSG00000027456	Sdcbp2	chr2:151572621-151590005	3.98434	1.29436	1.6221	0.00065	0.0342624
ENSMUST00000081380	ENSMUSG00000063975	Slco1a5	chr6:142234226-142322981	2.65405	0.861162	1.62384	5e-05	0.00413767
ENSMUST00000051401	ENSMUSG00000047501	Cldn4	chr5:134945118-134946934	5.55327	1.79817	1.62681	5e-05	0.00413767
ENSMUST00000089688	ENSMUSG00000000957	Mmp14	chr14:54431611-54441265	73.8145	23.8788	1.62818	5e-05	0.00413767
ENSMUST00000026907	ENSMUSG00000109764	Klkb1	chr8:45266688-45294859	0.84144	0.271292	1.63302	0.0002	0.0133323
ENSMUST00000049152	ENSMUSG00000038301	Snx10	chr6:51523900-51590679	10.3374	3.33146	1.63365	0.0006	0.0322352
ENSMUST00000090246	ENSMUSG00000050931	Sgms2	chr3:131318984-131496254	9.47862	3.05436	1.6338	5e-05	0.00413767
ENSMUST00000039559	ENSMUSG00000040152	Thbs1	chr2:118111875-118127133	100.548	32.2067	1.64245	5e-05	0.00413767
ENSMUST00000020629	ENSMUSG00000020363	Gfpt2	chr11:49794186-49838613	8.82905	2.81206	1.65063	5e-05	0.00413767
ENSMUST00000112756	ENSMUSG00000055003	Lrtm2	chr6:119236525-119352407	9.68264	3.0789	1.65299	0.00015	0.0105044
ENSMUST00000187467	ENSMUSG00000099398	Ms4a14	chr19:11301248-11314454	0.869073	0.276323	1.65312	0.0007	0.0362738
ENSMUST00000046533	ENSMUSG00000034686	Prr7	chr13:55464266-55473155	3.18851	1.01025	1.65817	0.0004	0.0235705
ENSMUST00000086763	ENSMUSG00000004730	Adgre1	chr17:57358685-57483529	20.1723	6.3826	1.66016	5e-05	0.00413767
ENSMUST00000102486	ENSMUSG00000006221	Hspb7	chr4:141420778-141425311	11.2146	3.54116	1.66309	5e-05	0.00413767
ENSMUST00000067778	ENSMUSG00000021360	Gcnt2	chr13:40859767-41013015	20.8447	6.57933	1.66367	0.00075	0.0382387
ENSMUST00000030336	ENSMUSG00000028599	Tnfrsf1b	chr4:145213462-145246870	44.2425	13.9286	1.66739	5e-05	0.00413767
ENSMUST00000146905	ENSMUSG00000047446	Arl4a	chr12:40033290-40038025	21.9928	6.91141	1.66998	5e-05	0.00413767
ENSMUST00000002989	ENSMUSG00000002910	Arrdc2	chr8:70835128-70839720	14.5819	4.58163	1.67024	5e-05	0.00413767
ENSMUST00000106908	ENSMUSG00000028525	Pde4b	chr4:102087542-102607259	40.1076	12.5848	1.67219	5e-05	0.00413767
ENSMUST00000004986	ENSMUSG00000004864	Mapk13	chr17:28769306-28778698	20.38	6.36182	1.67964	5e-05	0.00413767
ENSMUST00000093942	ENSMUSG00000070337	Gpr179	chr11:97332108-97352016	1.17528	0.365901	1.68348	0.0001	0.00752154
ENSMUST00000084501	ENSMUSG00000028370	Pappa	chr4:65124173-65357509	2.8294	0.880632	1.68389	5e-05	0.00413767
ENSMUST00000046285	ENSMUSG00000036887	C1qa	chr4:136895916-136898803	83.5355	25.9438	1.687	5e-05	0.00413767
ENSMUST00000021726	ENSMUSG00000011148	Adssl1	chr12:112620044-112641354	24.0173	7.42336	1.69393	5e-05	0.00413767
ENSMUST00000029748	ENSMUSG00000015947	Fcgr1	chr3:96282908-96293969	3.80797	1.17576	1.69543	5e-05	0.00413767
ENSMUST00000115032	ENSMUSG00000037447	Arid5a	chr1:36307732-36324029	6.00336	1.85229	1.69646	0.0001	0.00752154
ENSMUST00000047951	ENSMUSG00000041556	Fbxo2	chr4:148160620-148166424	2.58976	0.798871	1.69678	0.00035	0.0211828
ENSMUST00000005185	ENSMUSG00000005054	Cstb	chr10:78425669-78427619	188.757	58.1787	1.69797	5e-05	0.00413767
ENSMUST00000025563	ENSMUSG00000024661	Fth1	chr19:9982702-9985092	3741.16	1152.51	1.69871	5e-05	0.00413767
ENSMUST00000058914	ENSMUSG00000043091	Tuba1c	chr15:99029890-99038105	27.8512	8.55866	1.70228	5e-05	0.00413767
ENSMUST00000028187	ENSMUSG00000026840	Lamc3	chr2:31887290-31946539	11.8481	3.63526	1.70453	5e-05	0.00413767
ENSMUST00000033992	ENSMUSG00000031584	Gsr	chr8:33653237-33698163	82.5138	25.2995	1.70553	5e-05	0.00413767
ENSMUST00000008462	ENSMUSG00000008318	Relt	chr7:100845846-100863446	5.42553	1.66141	1.70735	5e-05	0.00413767
ENSMUST00000039323	ENSMUSG00000042510	AA986860	chr1:130731975-130744622	63.9976	19.5969	1.70739	5e-05	0.00413767
ENSMUST00000107619	ENSMUSG00000003032	Klf4	chr4:55527142-55532466	106.298	32.4866	1.7102	5e-05	0.00413767
ENSMUST00000113022	ENSMUSG00000056952	Tatdn2	chr6:113697049-113711069	16.3157	4.97369	1.71387	0.00035	0.0211828
ENSMUST00000024797	ENSMUSG00000064120	Mocs1	chr17:49427937-49455435	25.2539	7.666	1.71996	5e-05	0.00413767
ENSMUST00000004622	ENSMUSG00000004508	Gab2	chr7:97081585-97308946	34.8605	10.5746	1.721	5e-05	0.00413767
ENSMUST00000037360	ENSMUSG00000034226	Rhov	chr2:119269200-119271272	2.65303	0.803848	1.72264	0.00015	0.0105044
ENSMUST00000021283	ENSMUSG00000020901	Pik3r5	chr11:68432120-68497849	11.8126	3.57017	1.72626	5e-05	0.00413767
ENSMUST00000019998	ENSMUSG00000019851	Perp	chr10:18845019-18857073	35.2109	10.6369	1.72694	5e-05	0.00413767
ENSMUST00000060188	ENSMUSG00000047714	Ppp1r2	chr16:31251536-31275277	164.972	49.7687	1.72891	5e-05	0.00413767
ENSMUST00000114846	ENSMUSG00000026773	Pfkfb3	chr2:11471432-11554077	47.1371	14.2127	1.72969	5e-05	0.00413767
ENSMUST00000109367	ENSMUSG00000017002	Slpi	chr2:164354069-164389095	70.8732	21.364	1.73006	5e-05	0.00413767
ENSMUST00000046071	ENSMUSG00000042115	Klhdc8a	chr1:132298625-132307357	5.38405	1.61434	1.73775	5e-05	0.00413767
ENSMUST00000097950	ENSMUSG00000028525	Pde4b	chr4:102087542-102607259	32.9603	9.87052	1.73953	0.00075	0.0382387
ENSMUST00000112686	ENSMUSG00000071226	Cecr2	chr6:120666420-120771190	7.91892	2.35794	1.74778	5e-05	0.00413767
ENSMUST00000041438	ENSMUSG00000038332	Sesn1	chr10:41809934-41908424	42.8384	12.7384	1.74971	5e-05	0.00413767
ENSMUST00000020586	ENSMUSG00000020334	Slc22a4	chr11:53983122-54028090	1.45556	0.432808	1.74978	0.0001	0.00752154
ENSMUST00000021607	ENSMUSG00000021190	Lgmn	chr12:102394083-102439813	85.3035	25.3358	1.75143	0.0001	0.00752154
ENSMUST00000032476	ENSMUSG00000003153	Slc2a3	chr6:122727808-122801640	8.77392	2.58438	1.7634	5e-05	0.00413767
ENSMUST00000023329	ENSMUSG00000061100	Retnla	chr16:48842551-48844461	422.981	124.55	1.76387	5e-05	0.00413767
ENSMUST00000023143	ENSMUSG00000022500	Litaf	chr16:10959274-11066157	69.4217	20.428	1.76484	5e-05	0.00413767
ENSMUST00000020958	ENSMUSG00000020627	Klhl29	chr12:5077471-5375682	5.43316	1.59627	1.76709	5e-05	0.00413767
ENSMUST00000073350	ENSMUSG00000004552	Ctse	chr1:131638305-131675505	2.09675	0.61445	1.77079	0.00055	0.0301111
ENSMUST00000038275	ENSMUSG00000038175	Mylip	chr13:45389741-45412019	53.5613	15.6232	1.7775	5e-05	0.00413767
ENSMUST00000164163	ENSMUSG00000022372	Sla	chr15:66670752-66850721	15.7345	4.57221	1.78297	5e-05	0.00413767
ENSMUST00000031736	ENSMUSG00000029722	Agfg2	chr5:137650462-137684726	13.6978	3.97171	1.78611	5e-05	0.00413767
ENSMUST00000116304	ENSMUSG00000038642	Ctss	chr3:95526785-95556403	295.493	85.393	1.79093	5e-05	0.00413767
ENSMUST00000139848	ENSMUSG00000034472	Rasd2	chr8:75213943-75224113	5.75568	1.65723	1.79621	5e-05	0.00413767
ENSMUST00000025636	ENSMUSG00000024730	Ms4a8a	chr19:11067470-11081102	13.148	3.77452	1.80047	5e-05	0.00413767
ENSMUST00000025399	ENSMUSG00000024521	Pmaip1	chr18:66458603-66465550	18.9781	5.43582	1.80377	5e-05	0.00413767
ENSMUST00000033004	ENSMUSG00000030748	Il4ra	chr7:125552119-125579474	83.6113	23.8112	1.81206	5e-05	0.00413767
ENSMUST00000043315	ENSMUSG00000041481	Serpina3g	chr12:104236251-104241939	9.86679	2.80693	1.81359	5e-05	0.00413767
ENSMUST00000067150	ENSMUSG00000054252	Fgfr3	chr5:33721673-33737068	18.2526	5.18544	1.81556	0.00025	0.016035
ENSMUST00000053355	ENSMUSG00000050967	Creg2	chr1:39618405-39651474	0.505772	0.143477	1.81767	0.00045	0.0259452
ENSMUST00000027863	ENSMUSG00000026576	Atp1b1	chr1:164307671-164458355	393.473	111.147	1.82379	5e-05	0.00413767
ENSMUST00000067532	ENSMUSG00000024672	Ms4a7	chr19:11321038-11336144	8.10583	2.2821	1.8286	0.0001	0.00752154
ENSMUST00000062723	ENSMUSG00000032561	Acpp	chr9:104288250-104337748	6.25127	1.75766	1.8305	5e-05	0.00413767
ENSMUST00000027874	ENSMUSG00000026582	Sele	chr1:164048233-164057677	1.15025	0.323078	1.832	0.00035	0.0211828
ENSMUST00000023295	ENSMUSG00000022622	Acr	chr15:89568325-89574585	1.68178	0.471175	1.83565	0.0007	0.0362738
ENSMUST00000121337	ENSMUSG00000066363	Serpina3f	chr12:104214543-104221129	4.28226	1.19937	1.8361	0.0001	0.00752154
ENSMUST00000062315	ENSMUSG00000051498	Tlr6	chr5:64952030-64960097	3.11774	0.872939	1.83655	0.0001	0.00752154
ENSMUST00000032089	ENSMUSG00000030017	Reg3g	chr6:78466268-78468872	276.587	77.3198	1.83882	5e-05	0.00413767
ENSMUST00000168092	ENSMUSG00000089809	A930011G23Rik	chr5:99217425-99729062	22.6118	6.31832	1.83946	5e-05	0.00413767
ENSMUST00000049022	ENSMUSG00000037966	Ninj1	chr13:49187484-49196244	46.3657	12.9039	1.84525	5e-05	0.00413767
ENSMUST00000003574	ENSMUSG00000003484	Cyp4f18	chr8:71988481-72010906	16.393	4.55901	1.84629	5e-05	0.00413767
ENSMUST00000117179	ENSMUSG00000031565	Fgfr1	chr8:25513653-25575718	12.1929	3.38704	1.84795	0.001	0.0477064
ENSMUST00000005829	ENSMUSG00000005686	Ampd3	chr7:110768205-110812405	22.7084	6.29559	1.85082	5e-05	0.00413767
ENSMUST00000087241	ENSMUSG00000050010	Shisa3	chr5:67607881-67613992	1.23854	0.343169	1.85165	5e-05	0.00413767
ENSMUST00000065112	ENSMUSG00000033453	Adamts15	chr9:30899154-30922452	44.9675	12.4471	1.85307	5e-05	0.00413767
ENSMUST00000090559	ENSMUSG00000068742	Cry2	chr2:92403645-92434043	58.6304	16.1809	1.85736	5e-05	0.00413767
ENSMUST00000029623	ENSMUSG00000027995	Tlr2	chr3:83836271-83841767	23.514	6.47859	1.85977	5e-05	0.00413767
ENSMUST00000048486	ENSMUSG00000033860	Fgg	chr3:83007723-83015049	1.86215	0.51048	1.86705	0.00035	0.0211828
ENSMUST00000102745	ENSMUSG00000021281	Tnfaip2	chr12:111442468-111455018	32.015	8.74802	1.87172	5e-05	0.00413767
ENSMUST00000070733	ENSMUSG00000056553	Ptprn2	chr12:116485832-117276793	2.17552	0.593298	1.87453	0.00035	0.0211828
ENSMUST00000091319	ENSMUSG00000095028	Sirpb1b	chr3:15495750-15575065	4.38212	1.19319	1.8768	0.0005	0.0280447
ENSMUST00000070642	ENSMUSG00000056501	Cebpb	chr2:167688914-167690418	175.029	47.6289	1.87768	5e-05	0.00413767
ENSMUST00000101472	ENSMUSG00000047446	Arl4a	chr12:40033290-40038025	43.6235	11.8342	1.88214	0.00015	0.0105044
ENSMUST00000110095	ENSMUSG00000031842	Pde4c	chr8:70723719-70751186	1.61354	0.437051	1.88436	5e-05	0.00413767
ENSMUST00000062525	ENSMUSG00000048234	Rnf149	chr1:39547569-39577405	53.9017	14.5892	1.88543	5e-05	0.00413767
ENSMUST00000096355	ENSMUSG00000071713	Csf2rb	chr15:78325989-78351000	27.5978	7.40013	1.89893	5e-05	0.00413767
ENSMUST00000077088	ENSMUSG00000030254	Rad18	chr6:112619849-112696686	5.71815	1.52986	1.90215	5e-05	0.00413767
ENSMUST00000030339	ENSMUSG00000028602	Tnfrsf8	chr4:145267136-145315147	0.730583	0.193873	1.91394	0.001	0.0477064
ENSMUST00000025295	ENSMUSG00000024427	Spry4	chr18:38586267-38601268	37.9366	10.046	1.91697	5e-05	0.00413767
ENSMUST00000027997	ENSMUSG00000026678	Rgs5	chr1:169655500-169695813	16.363	4.32431	1.9199	5e-05	0.00413767
ENSMUST00000030398	ENSMUSG00000028645	Slc2a1	chr4:119108710-119138801	21.1506	5.57926	1.92255	5e-05	0.00413767
ENSMUST00000060484	ENSMUSG00000049037	Clec4a1	chr6:122921847-122934619	17.3703	4.55888	1.92987	5e-05	0.00413767
ENSMUST00000063062	ENSMUSG00000040809	Chil3	chr3:106147553-106167564	712.337	186.494	1.93343	5e-05	0.00413767
ENSMUST00000052949	ENSMUSG00000025877	Hk3	chr13:54949410-55021385	3.60949	0.944613	1.934	0.0009	0.0440307
ENSMUST00000069245	ENSMUSG00000055561	Spink5	chr18:43963234-44022501	13.4788	3.50934	1.94142	5e-05	0.00413767
ENSMUST00000058178	ENSMUSG00000051397	Tacstd2	chr6:67532488-67556204	53.613	13.9065	1.94682	5e-05	0.00413767
ENSMUST00000029865	ENSMUSG00000028211	Trp53inp1	chr4:11156430-11174379	135.342	35.0979	1.94715	5e-05	0.00413767
ENSMUST00000105999	ENSMUSG00000028776	Tinagl1	chr4:130165601-130175122	122.046	31.4522	1.9562	5e-05	0.00413767
ENSMUST00000098458	ENSMUSG00000044244	Il20rb	chr9:100457718-100486788	3.46575	0.887521	1.96532	5e-05	0.00413767
ENSMUST00000191677	ENSMUSG00000026121	Sema4c	chr1:36548638-36558349	5.82022	1.48769	1.968	0.00065	0.0342624
ENSMUST00000027237	ENSMUSG00000026068	Il18rap	chr1:40515361-40551705	9.94534	2.53458	1.97228	5e-05	0.00413767
ENSMUST00000046332	ENSMUSG00000036896	C1qc	chr4:136889803-136893065	72.39	18.4338	1.97344	5e-05	0.00413767
ENSMUST00000070178	ENSMUSG00000056203	Tas2r135	chr6:42405433-42406526	4.35064	1.10452	1.97781	5e-05	0.00413767
ENSMUST00000099575	ENSMUSG00000074934	Grem1	chr2:113746163-113758646	1.68816	0.427659	1.98092	5e-05	0.00413767
ENSMUST00000052281	ENSMUSG00000043439	E130012A19Rik	chr11:97627388-97629702	9.02611	2.28186	1.9839	5e-05	0.00413767
ENSMUST00000027675	ENSMUSG00000026417	Pigr	chr1:130826683-130852249	43.8052	11.0682	1.98468	5e-05	0.00413767
ENSMUST00000055159	ENSMUSG00000043157	Arl11	chr14:61309752-61311936	11.5084	2.90114	1.988	5e-05	0.00413767
ENSMUST00000033255	ENSMUSG00000030954	Gp2	chr7:119442536-119459285	2.46188	0.615498	1.99993	0.00015	0.0105044
ENSMUST00000001051	ENSMUSG00000001025	S100a6	chr3:90612881-90614414	392.34	98.0644	2.0003	5e-05	0.00413767
ENSMUST00000058702	ENSMUSG00000054499	Dedd2	chr7:25202839-25220615	23.7954	5.94758	2.00031	5e-05	0.00413767
ENSMUST00000171629	ENSMUSG00000045094	Arhgef37	chr18:61493793-61536536	3.45927	0.861288	2.0059	5e-05	0.00413767
ENSMUST00000086199	ENSMUSG00000026473	Glul	chr1:153849541-153909723	401.033	99.7239	2.00771	5e-05	0.00413767
ENSMUST00000033900	ENSMUSG00000031504	Rab20	chr8:11453517-11480241	15.9901	3.97484	2.00821	5e-05	0.00413767
ENSMUST00000059295	ENSMUSG00000049303	Syt12	chr19:4445907-4477447	1.33605	0.330835	2.01379	5e-05	0.00413767
ENSMUST00000099816	ENSMUSG00000075122	Cd80	chr16:38458932-38486933	3.02168	0.747126	2.01593	5e-05	0.00413767
ENSMUST00000046765	ENSMUSG00000033998	Kcnk1	chr8:125995169-126030685	16.9062	4.13681	2.03096	5e-05	0.00413767
ENSMUST00000041768	ENSMUSG00000033715	Akr1c14	chr13:4049010-4090422	120.309	29.3717	2.03425	5e-05	0.00413767
ENSMUST00000194632	ENSMUSG00000033684	Qsox1	chr1:155778157-155812889	90.6931	21.9584	2.04622	5e-05	0.00413767
ENSMUST00000054889	ENSMUSG00000047230	Cldn2	chrX:139800827-139811386	0.906774	0.219301	2.04783	0.0008	0.0401414
ENSMUST00000024811	ENSMUSG00000024014	Pim1	chr17:29461895-29496111	58.0644	13.9507	2.05732	5e-05	0.00413767
ENSMUST00000127122	ENSMUSG00000036053	Fmnl2	chr2:52857859-53134202	18.5838	4.46408	2.05761	0.0001	0.00752154
ENSMUST00000001156	ENSMUSG00000001128	Cfp	chrX:20925453-20931555	20.3315	4.87918	2.059	5e-05	0.00413767
ENSMUST00000000574	ENSMUSG00000000562	Adora3	chr3:105870857-105924042	1.55033	0.37121	2.06227	0.0005	0.0280447
ENSMUST00000036884	ENSMUSG00000033863	Klf9	chr19:23141225-23166911	172.4	41.2206	2.06432	5e-05	0.00413767
ENSMUST00000101491	ENSMUSG00000029915	Clec5a	chr6:40574893-40585803	3.75059	0.893782	2.06912	5e-05	0.00413767
ENSMUST00000028307	ENSMUSG00000026938	Fcna	chr2:25624665-25628030	2.42871	0.57817	2.07062	0.00035	0.0211828
ENSMUST00000021903	ENSMUSG00000021453	Gadd45g	chr13:51846677-51848468	44.7579	10.611	2.07658	5e-05	0.00413767
ENSMUST00000034915	ENSMUSG00000032359	Ctsh	chr9:90054151-90076089	397.238	93.9857	2.07949	5e-05	0.00413767
ENSMUST00000027422	ENSMUSG00000026220	Slc16a14	chr1:84905897-84935134	0.635125	0.149986	2.08222	0.00075	0.0382387
ENSMUST00000150290	ENSMUSG00000050335	Lgals3	chr14:47367750-47386160	267.493	62.9736	2.08668	5e-05	0.00413767
ENSMUST00000036188	ENSMUSG00000042677	Zc3h12a	chr4:125118422-125127840	21.9562	5.16732	2.08714	5e-05	0.00413767
ENSMUST00000081945	ENSMUSG00000047641	Krt87	chr15:101431489-101438804	1.22786	0.287481	2.09461	0.00065	0.0342624
ENSMUST00000046290	ENSMUSG00000033192	Lpcat2	chr8:92853652-92919279	10.116	2.36553	2.09641	5e-05	0.00413767
ENSMUST00000096357	ENSMUSG00000071715	Ncf4	chr15:78244800-78262580	17.397	4.06768	2.09656	5e-05	0.00413767
ENSMUST00000198128	ENSMUSG00000001025	S100a6	chr3:90612881-90614414	649.791	150.619	2.10907	5e-05	0.00413767
ENSMUST00000031320	ENSMUSG00000029373	Pf4	chr5:90772434-90773383	83.5928	19.3251	2.1129	5e-05	0.00413767
ENSMUST00000024696	ENSMUSG00000023903	Mmp25	chr17:23629457-23645269	1.84082	0.424674	2.11592	5e-05	0.00413767
ENSMUST00000045173	ENSMUSG00000035493	Tgfbi	chr13:56609602-56639339	98.1187	22.5658	2.12039	5e-05	0.00413767
ENSMUST00000198631	ENSMUSG00000029484	Anxa3	chr5:96793338-96845966	102.969	23.4905	2.13206	0.00065	0.0342624
ENSMUST00000168260	ENSMUSG00000032578	Cish	chr9:107296025-107302784	12.6523	2.87919	2.13567	0.00015	0.0105044
ENSMUST00000065408	ENSMUSG00000079018	Ly6c1	chr15:75044017-75048830	584.219	132.615	2.13926	5e-05	0.00413767
ENSMUST00000113674	ENSMUSG00000024914	Drap1	chr19:5406739-5424979	59.4306	13.4869	2.13965	0.0001	0.00752154
ENSMUST00000189061	ENSMUSG00000026358	Rgs1	chr1:144242295-144249242	1.82044	0.41279	2.14081	5e-05	0.00413767
ENSMUST00000029766	ENSMUSG00000028121	Bcar3	chr3:122419777-122530191	53.1071	11.9778	2.14854	5e-05	0.00413767
ENSMUST00000024698	ENSMUSG00000023905	Tnfrsf12a	chr17:23675446-23677449	48.129	10.8265	2.15234	5e-05	0.00413767
ENSMUST00000068044	ENSMUSG00000022094	Slc39a14	chr14:70303468-70351425	16.4222	3.68487	2.15596	5e-05	0.00413767
ENSMUST00000137906	ENSMUSG00000037447	Arid5a	chr1:36307732-36324029	4.61706	1.03268	2.16058	0.0001	0.00752154
ENSMUST00000107377	ENSMUSG00000028364	Tnc	chr4:63959784-64047015	15.0352	3.35569	2.16366	5e-05	0.00413767
ENSMUST00000174355	ENSMUSG00000002985	Apoe	chr7:19696108-19699188	718.68	159.376	2.17292	0.00075	0.0382387
ENSMUST00000207982	ENSMUSG00000030579	Tyrobp	chr7:30413759-30417582	306.054	67.6989	2.17658	5e-05	0.00413767
ENSMUST00000048129	ENSMUSG00000033644	Piwil2	chr14:70372479-70429094	0.734	0.16229	2.1772	5e-05	0.00413767
ENSMUST00000020145	ENSMUSG00000019970	Sgk1	chr10:21882183-21999903	168.686	37.2548	2.17884	5e-05	0.00413767
ENSMUST00000033941	ENSMUSG00000031538	Plat	chr8:22757746-22782844	58.1327	12.8345	2.17932	5e-05	0.00413767
ENSMUST00000120537	ENSMUSG00000053175	Bcl3	chr7:19808461-19822770	28.3014	6.2328	2.18292	5e-05	0.00413767
ENSMUST00000028882	ENSMUSG00000027399	Il1a	chr2:129297369-129309972	11.6555	2.56686	2.18294	5e-05	0.00413767
ENSMUST00000031263	ENSMUSG00000029321	Slc10a6	chr5:103605710-103629403	26.575	5.75406	2.20742	5e-05	0.00413767
ENSMUST00000004913	ENSMUSG00000004791	Pgf	chr12:85166638-85177296	7.66015	1.65757	2.20831	5e-05	0.00413767
ENSMUST00000001184	ENSMUSG00000001156	Mxd1	chr6:86647041-86669161	41.1952	8.86751	2.21587	5e-05	0.00413767
ENSMUST00000039490	ENSMUSG00000035678	Tnfsf9	chr17:57092034-57107757	5.04823	1.08443	2.21884	5e-05	0.00413767
ENSMUST00000099126	ENSMUSG00000074622	Mafb	chr2:160363702-160367065	16.9696	3.63676	2.22223	5e-05	0.00413767
ENSMUST00000064151	ENSMUSG00000025509	Pnpla2	chr7:141455197-141460743	49.107	10.5236	2.22231	5e-05	0.00413767
ENSMUST00000019997	ENSMUSG00000019850	Tnfaip3	chr10:19000909-19015657	28.6633	6.12883	2.22552	5e-05	0.00413767
ENSMUST00000119469	ENSMUSG00000089942	Pira2	chr7:3836811-3845051	3.86844	0.823766	2.23144	5e-05	0.00413767
ENSMUST00000050770	ENSMUSG00000049130	C5ar1	chr7:16246742-16259540	18.5015	3.91695	2.23984	5e-05	0.00413767
ENSMUST00000079957	ENSMUSG00000058715	Fcer1g	chr1:171229571-171234365	194.842	41.0835	2.24567	5e-05	0.00413767
ENSMUST00000071130	ENSMUSG00000060063	Alox5ap	chr5:149264766-149288153	75.8327	15.9883	2.24581	5e-05	0.00413767
ENSMUST00000049614	ENSMUSG00000043740	B430306N03Rik	chr17:48316140-48327024	3.15533	0.663372	2.2499	5e-05	0.00413767
ENSMUST00000060574	ENSMUSG00000047228	BC048546	chr6:128539826-128581608	12.608	2.64815	2.25128	5e-05	0.00413767
ENSMUST00000023779	ENSMUSG00000023034	Nr4a1	chr15:101266845-101274792	52.5421	10.9536	2.26207	5e-05	0.00413767
ENSMUST00000002284	ENSMUSG00000046223	Plaur	chr7:24462483-24475967	66.0695	13.7593	2.26358	5e-05	0.00413767
ENSMUST00000021413	ENSMUSG00000021025	Nfkbia	chr12:55489410-55492647	247.229	50.9543	2.27857	5e-05	0.00413767
ENSMUST00000026546	ENSMUSG00000025473	Adam8	chr7:139950439-139992562	17.9269	3.69095	2.28006	5e-05	0.00413767
ENSMUST00000005976	ENSMUSG00000005824	Tnfsf14	chr17:57189491-57194189	3.60074	0.740269	2.28217	5e-05	0.00413767
ENSMUST00000050562	ENSMUSG00000050370	Ch25h	chr19:34473785-34481546	11.7549	2.41481	2.28328	5e-05	0.00413767
ENSMUST00000178034	ENSMUSG00000022218	Tgm1	chr14:55700008-55713492	4.28416	0.880079	2.28331	5e-05	0.00413767
ENSMUST00000017841	ENSMUSG00000017697	Ada	chr2:163726583-163750239	5.00667	1.02714	2.28521	5e-05	0.00413767
ENSMUST00000059091	ENSMUSG00000056025	Clca3a1	chr3:144729915-144760841	3.61694	0.740314	2.28856	5e-05	0.00413767
ENSMUST00000078451	ENSMUSG00000058818	Pirb	chr7:3711408-3720382	26.4	5.39217	2.2916	5e-05	0.00413767
ENSMUST00000105401	ENSMUSG00000009292	Trpm2	chr10:77907721-77969854	2.14911	0.438623	2.29269	5e-05	0.00413767
ENSMUST00000070653	ENSMUSG00000025161	Slc16a3	chr11:120948479-120960868	9.30847	1.88857	2.30125	0.00015	0.0105044
ENSMUST00000025025	ENSMUSG00000024190	Dusp1	chr17:26505589-26508519	266.712	53.6866	2.31265	5e-05	0.00413767
ENSMUST00000130560	ENSMUSG00000022548	Apod	chr16:31296191-31314808	5.03842	1.0116	2.31634	0.0001	0.00752154
ENSMUST00000096356	ENSMUSG00000071714	Csf2rb2	chr15:78282516-78305603	12.3784	2.48407	2.31705	5e-05	0.00413767
ENSMUST00000020448	ENSMUSG00000020227	Irak3	chr10:120141647-120224917	17.8904	3.58228	2.32024	5e-05	0.00413767
ENSMUST00000030551	ENSMUSG00000028766	Alpl	chr4:137741732-137796384	5.71435	1.13492	2.332	5e-05	0.00413767
ENSMUST00000000642	ENSMUSG00000000628	Hk2	chr6:82725024-82774454	22.0341	4.34043	2.34383	5e-05	0.00413767
ENSMUST00000030025	ENSMUSG00000028341	Nr4a3	chr4:48045152-48086447	3.94169	0.770551	2.35485	5e-05	0.00413767
ENSMUST00000030585	ENSMUSG00000028794	A3galt2	chr4:128755363-128769298	1.12293	0.219326	2.35612	0.0001	0.00752154
ENSMUST00000048065	ENSMUSG00000041754	Trem3	chr17:48247776-48258841	5.2665	1.02712	2.35824	5e-05	0.00413767
ENSMUST00000039516	ENSMUSG00000035105	Egln3	chr12:54178980-54203860	3.89079	0.755784	2.36402	5e-05	0.00413767
ENSMUST00000109820	ENSMUSG00000007659	Bcl2l1	chr2:152780667-152831728	91.2337	17.7169	2.36444	5e-05	0.00413767
ENSMUST00000043059	ENSMUSG00000038264	Sema7a	chr9:57940112-57962865	94.2526	18.1214	2.37884	5e-05	0.00413767
ENSMUST00000094451	ENSMUSG00000047875	Gpr157	chr4:150087364-150105927	10.56	2.02949	2.37942	5e-05	0.00413767
ENSMUST00000070690	ENSMUSG00000056529	Ptafr	chr4:132564066-132582683	12.2093	2.34616	2.3796	5e-05	0.00413767
ENSMUST00000038562	ENSMUSG00000039911	Spsb1	chr4:149896282-149955043	29.4985	5.64268	2.38619	5e-05	0.00413767
ENSMUST00000081134	ENSMUSG00000060445	Sycp2	chr2:178345292-178407685	0.807053	0.154143	2.38839	5e-05	0.00413767
ENSMUST00000024839	ENSMUSG00000024042	Sik1	chr17:31844247-31855792	149.196	28.194	2.40375	5e-05	0.00413767
ENSMUST00000068291	ENSMUSG00000067235	H2-Q10	chr17:35470088-35474563	3.58565	0.677028	2.40495	0.0004	0.0235705
ENSMUST00000045374	ENSMUSG00000041046	Ramp3	chr11:6658520-6677475	8.49155	1.59847	2.40933	5e-05	0.00413767
ENSMUST00000027941	ENSMUSG00000026628	Atf3	chr1:191170295-191218039	14.3068	2.68776	2.41222	5e-05	0.00413767
ENSMUST00000212436	ENSMUSG00000110622	KIAA1683	chr8:70703456-70717650	1.25275	0.234903	2.41496	5e-05	0.00413767
ENSMUST00000064922	ENSMUSG00000052837	Junb	chr8:84976909-84978718	148.059	27.6194	2.42242	5e-05	0.00413767
ENSMUST00000111390	ENSMUSG00000037936	Scarb1	chr5:125277086-125341094	28.4153	5.22333	2.44363	0.00045	0.0259452
ENSMUST00000061829	ENSMUSG00000051439	Cd14	chr18:36725073-36726736	91.6848	16.8303	2.44562	5e-05	0.00413767
ENSMUST00000056089	ENSMUSG00000050777	Tmem37	chr1:120067376-120078069	59.0886	10.7946	2.45258	5e-05	0.00413767
ENSMUST00000052296	ENSMUSG00000048776	Pthlh	chr6:147252100-147264183	1.62415	0.296463	2.45376	0.0004	0.0235705
ENSMUST00000050544	ENSMUSG00000022367	Has2	chr15:56665626-56694539	0.793323	0.144673	2.45511	5e-05	0.00413767
ENSMUST00000046384	ENSMUSG00000036905	C1qb	chr4:136880128-136886187	101.181	18.4216	2.45747	5e-05	0.00413767
ENSMUST00000039388	ENSMUSG00000034936	Arl4d	chr11:101665540-101667832	101.62	18.5011	2.4575	5e-05	0.00413767
ENSMUST00000006818	ENSMUSG00000006642	Tcf23	chr5:30968661-30977018	2.4735	0.44621	2.47076	5e-05	0.00413767
ENSMUST00000064068	ENSMUSG00000052270	Fpr2	chr17:17887851-17971677	26.0437	4.68805	2.47387	5e-05	0.00413767
ENSMUST00000167545	ENSMUSG00000001227	Sema6b	chr17:56123084-56140343	11.1022	1.99027	2.47981	5e-05	0.00413767
ENSMUST00000087600	ENSMUSG00000058624	Gda	chr19:21391306-21473445	39.9282	7.14378	2.48265	5e-05	0.00413767
ENSMUST00000040065	ENSMUSG00000033777	Tlr13	chrX:106143228-106160493	20.2512	3.6123	2.48702	5e-05	0.00413767
ENSMUST00000024849	ENSMUSG00000024053	Emilin2	chr17:71252175-71310965	19.7654	3.52428	2.48758	5e-05	0.00413767
ENSMUST00000164993	ENSMUSG00000041324	Inhba	chr13:16011850-16027211	3.73498	0.662684	2.49471	5e-05	0.00413767
ENSMUST00000085050	ENSMUSG00000066361	Serpina3c	chr12:104146381-104153870	14.9497	2.63832	2.50242	5e-05	0.00413767
ENSMUST00000027966	ENSMUSG00000026656	Fcgr2b	chr1:170958616-170976547	13.5404	2.38721	2.50388	5e-05	0.00413767
ENSMUST00000216150	ENSMUSG00000066687	Zbtb16	chr9:48654296-48836222	47.1777	8.27051	2.51206	0.0001	0.00752154
ENSMUST00000057145	ENSMUSG00000045502	Hcar2	chr5:123863569-123865499	10.8098	1.89209	2.51429	5e-05	0.00413767
ENSMUST00000032234	ENSMUSG00000008845	Cd163	chr6:124304655-124330527	8.80348	1.53975	2.51538	5e-05	0.00413767
ENSMUST00000167323	ENSMUSG00000090698	Apold1	chr6:134981717-134986836	6.56428	1.14674	2.5171	5e-05	0.00413767
ENSMUST00000162746	ENSMUSG00000026580	Selp	chr1:164115263-164220277	6.07594	1.05949	2.51974	0.00035	0.0211828
ENSMUST00000009329	ENSMUSG00000009185	Ccl8	chr11:82115184-82116799	33.1165	5.7646	2.52226	5e-05	0.00413767
ENSMUST00000037491	ENSMUSG00000039109	F13a1	chr13:36867177-37050244	48.1388	8.36284	2.52514	5e-05	0.00413767
ENSMUST00000051676	ENSMUSG00000046694	Fam46b	chr4:133479355-133487938	17.2922	2.98035	2.53657	5e-05	0.00413767
ENSMUST00000051241	ENSMUSG00000044786	Zfp36	chr7:28376783-28392708	83.4854	14.3434	2.54114	5e-05	0.00413767
ENSMUST00000022561	ENSMUSG00000021986	Amer2	chr14:60378285-60381003	1.01081	0.172826	2.54812	5e-05	0.00413767
ENSMUST00000078778	ENSMUSG00000062593	Lilrb4a	chr10:51491017-51496613	63.0796	10.6851	2.56157	5e-05	0.00413767
ENSMUST00000021271	ENSMUSG00000020893	Per1	chr11:69095216-69109960	63.2525	10.6691	2.56769	5e-05	0.00413767
ENSMUST00000006392	ENSMUSG00000021403	Serpinb9b	chr13:33027415-33041884	1.47144	0.247361	2.57254	5e-05	0.00413767
ENSMUST00000163691	ENSMUSG00000042622	Maff	chr15:79347540-79359072	16.091	2.69383	2.57853	0.0001	0.00752154
ENSMUST00000030811	ENSMUSG00000028967	Errfi1	chr4:150853918-150868892	204.071	34.0041	2.58529	5e-05	0.00413767
ENSMUST00000019266	ENSMUSG00000019122	Ccl9	chr11:83572918-83578636	19.034	3.16377	2.58886	5e-05	0.00413767
ENSMUST00000031243	ENSMUSG00000029304	Spp1	chr5:104435117-104441050	172.668	28.6682	2.59048	5e-05	0.00413767
ENSMUST00000041357	ENSMUSG00000037095	Lrg1	chr17:56119679-56121946	128.856	21.3894	2.59079	5e-05	0.00413767
ENSMUST00000115421	ENSMUSG00000012428	Steap4	chr5:7960456-7982213	31.8624	5.26822	2.59647	5e-05	0.00413767
ENSMUST00000027368	ENSMUSG00000026177	Slc11a1	chr1:74375194-74386062	19.5302	3.21371	2.60339	5e-05	0.00413767
ENSMUST00000101004	ENSMUSG00000020893	Per1	chr11:69095216-69109960	35.1236	5.75238	2.61021	0.0003	0.0186561
ENSMUST00000164044	ENSMUSG00000059498	Fcgr3	chr1:171051174-171064935	72.9908	11.9491	2.61081	5e-05	0.00413767
ENSMUST00000031017	ENSMUSG00000029135	Fosl2	chr5:32135800-32157842	84.2566	13.6431	2.62662	5e-05	0.00413767
ENSMUST00000109958	ENSMUSG00000079014	Serpina3i	chr12:104263121-104269372	2.66555	0.429807	2.63267	5e-05	0.00413767
ENSMUST00000029564	ENSMUSG00000027952	Pmvk	chr3:89454540-89469013	100.183	16.0829	2.63904	5e-05	0.00413767
ENSMUST00000097891	ENSMUSG00000073758	Sh3d21	chr4:126150601-126163491	13.7587	2.20583	2.64095	5e-05	0.00413767
ENSMUST00000019050	ENSMUSG00000018906	P4ha2	chr11:54100094-54131662	21.7341	3.48134	2.64225	5e-05	0.00413767
ENSMUST00000035077	ENSMUSG00000032496	Ltf	chr9:111019270-111042767	37.5578	5.97338	2.65249	5e-05	0.00413767
ENSMUST00000018918	ENSMUSG00000018774	Cd68	chr11:69664212-69666153	100.624	15.9986	2.65296	5e-05	0.00413767
ENSMUST00000004473	ENSMUSG00000004359	Spic	chr10:88674771-88685015	1.16719	0.18235	2.67826	0.00065	0.0342624
ENSMUST00000029771	ENSMUSG00000028128	F3	chr3:121723536-121735048	134.366	20.8941	2.68501	5e-05	0.00413767
ENSMUST00000052437	ENSMUSG00000049988	Lrrc25	chr8:70616154-70620890	15.4239	2.38464	2.69332	5e-05	0.00413767
ENSMUST00000063446	ENSMUSG00000061878	Sphk1	chr11:116529214-116536674	11.5719	1.77002	2.70879	5e-05	0.00413767
ENSMUST00000057567	ENSMUSG00000044103	Il1f9	chr2:24186475-24193568	12.0354	1.83129	2.71635	5e-05	0.00413767
ENSMUST00000032663	ENSMUSG00000030472	Ceacam18	chr7:43634706-43649295	0.718454	0.109073	2.71961	0.00095	0.0458858
ENSMUST00000106242	ENSMUSG00000030786	Itgam	chr7:128062639-128128160	25.2756	3.82859	2.72286	5e-05	0.00413767
ENSMUST00000001253	ENSMUSG00000020651	Slc26a4	chr12:31519826-31559969	3.35265	0.506561	2.72649	5e-05	0.00413767
ENSMUST00000056336	ENSMUSG00000050511	Oprd1	chr4:132110725-132144486	0.532824	0.0799755	2.73603	0.00045	0.0259452
ENSMUST00000078825	ENSMUSG00000059089	Fcgr4	chr1:171018919-171029761	19.4882	2.92294	2.73711	5e-05	0.00413767
ENSMUST00000079476	ENSMUSG00000032691	Nlrp3	chr11:59541567-59566956	8.19342	1.22829	2.73781	5e-05	0.00413767
ENSMUST00000025046	ENSMUSG00000024210	Ip6k3	chr17:27143968-27167764	4.74249	0.710717	2.7383	5e-05	0.00413767
ENSMUST00000205503	ENSMUSG00000004609	Cd33	chr7:43524215-43544428	24.9578	3.73851	2.73896	5e-05	0.00413767
ENSMUST00000171470	ENSMUSG00000024529	Lox	chr18:52516068-52529867	67.5602	10.066	2.74668	5e-05	0.00413767
ENSMUST00000061516	ENSMUSG00000045551	Fpr1	chr17:17876470-17883940	40.2948	5.95638	2.75809	5e-05	0.00413767
ENSMUST00000002360	ENSMUSG00000002289	Angptl4	chr17:33773749-33781575	34.7911	5.14249	2.75818	5e-05	0.00413767
ENSMUST00000093852	ENSMUSG00000066687	Zbtb16	chr9:48654296-48836222	83.2974	12.2887	2.76093	5e-05	0.00413767
ENSMUST00000024238	ENSMUSG00000023473	Celsr3	chr9:108826319-108852969	0.800552	0.117397	2.7696	5e-05	0.00413767
ENSMUST00000032500	ENSMUSG00000030350	Prmt8	chr6:127689010-127769472	18.7331	2.74295	2.77179	5e-05	0.00413767
ENSMUST00000047687	ENSMUSG00000041608	Entpd3	chr9:120539817-120568327	6.3551	0.916078	2.79437	5e-05	0.00413767
ENSMUST00000000208	ENSMUSG00000000204	Slfn4	chr11:83175185-83190216	9.60164	1.37622	2.80257	5e-05	0.00413767
ENSMUST00000022787	ENSMUSG00000022180	Slc7a8	chr14:54722215-54781886	5.52071	0.789705	2.80547	5e-05	0.00413767
ENSMUST00000163885	ENSMUSG00000091275	Gm3248	chr14:5939224-5961745	1.31797	0.188204	2.80795	5e-05	0.00413767
ENSMUST00000070639	ENSMUSG00000074417	Gm14548	chr7:3884241-3898120	5.8083	0.80613	2.84903	5e-05	0.00413767
ENSMUST00000054599	ENSMUSG00000050359	Sprr1a	chr3:92483951-92485895	6.50989	0.903328	2.84931	5e-05	0.00413767
ENSMUST00000081103	ENSMUSG00000026656	Fcgr2b	chr1:170958616-170976547	63.9567	8.87162	2.84982	5e-05	0.00413767
ENSMUST00000019721	ENSMUSG00000019577	Pdk4	chr6:5483350-5496309	16.5113	2.27077	2.8622	5e-05	0.00413767
ENSMUST00000081924	ENSMUSG00000059108	Ifitm6	chr7:141015698-141017924	42.0442	5.77388	2.86429	5e-05	0.00413767
ENSMUST00000170091	ENSMUSG00000025044	Msr1	chr8:39581684-39642673	8.54879	1.17325	2.86521	5e-05	0.00413767
ENSMUST00000096350	ENSMUSG00000042622	Maff	chr15:79347540-79359072	31.8538	4.3569	2.87009	5e-05	0.00413767
ENSMUST00000042740	ENSMUSG00000004668	Abca13	chr11:9191941-9684259	0.747877	0.101892	2.87576	5e-05	0.00413767
ENSMUST00000125733	ENSMUSG00000050671	Ism2	chr12:87278637-87299705	1.10602	0.149295	2.88914	0.0009	0.0440307
ENSMUST00000004201	ENSMUSG00000004098	Col5a3	chr9:20770049-20815067	5.64648	0.760219	2.89287	5e-05	0.00413767
ENSMUST00000032667	ENSMUSG00000030474	Siglece	chr7:43651069-43660161	13.0971	1.7619	2.89405	5e-05	0.00413767
ENSMUST00000106069	ENSMUSG00000025473	Adam8	chr7:139950439-139992562	7.27036	0.974906	2.89869	0.00025	0.016035
ENSMUST00000021685	ENSMUSG00000021260	Hhipl1	chr12:108306269-108328300	1.77006	0.235808	2.90812	5e-05	0.00413767
ENSMUST00000022595	ENSMUSG00000022018	Rgcc	chr14:79288755-79301645	426.301	56.5609	2.91399	5e-05	0.00413767
ENSMUST00000042818	ENSMUSG00000035828	Pim3	chr15:88862185-88865718	100.911	13.3699	2.91602	5e-05	0.00413767
ENSMUST00000032573	ENSMUSG00000030413	Pglyrp1	chr7:18884679-18890441	103.64	13.7287	2.91632	5e-05	0.00413767
ENSMUST00000114482	ENSMUSG00000026981	Il1rn	chr2:24336852-24351494	21.9557	2.90509	2.91794	5e-05	0.00413767
ENSMUST00000000193	ENSMUSG00000035385	Ccl2	chr11:82028223-82038562	7.58066	1.0013	2.92045	5e-05	0.00413767
ENSMUST00000062405	ENSMUSG00000049892	Rasd1	chr11:59963180-59964944	13.5654	1.77198	2.9365	5e-05	0.00413767
ENSMUST00000063820	ENSMUSG00000031444	F10	chr8:13037307-13056676	3.77466	0.49248	2.93821	0.00015	0.0105044
ENSMUST00000020710	ENSMUSG00000020432	Tcn2	chr11:3917191-3932159	59.9323	7.80007	2.94178	5e-05	0.00413767
ENSMUST00000096232	ENSMUSG00000071637	Cebpd	chr16:15887285-16146851	90.5536	11.6808	2.95463	5e-05	0.00413767
ENSMUST00000030673	ENSMUSG00000028859	Csf3r	chr4:126024549-126044440	35.7204	4.5316	2.97865	5e-05	0.00413767
ENSMUST00000048121	ENSMUSG00000041794	Myrip	chr9:120301512-120474841	26.528	3.35244	2.98423	5e-05	0.00413767
ENSMUST00000074740	ENSMUSG00000061039	Olfr920	chr9:38752298-38756739	5.93115	0.744954	2.99309	5e-05	0.00413767
ENSMUST00000036070	ENSMUSG00000021750	Fam107a	chr14:8296273-8318023	20.152	2.5074	3.00666	5e-05	0.00413767
ENSMUST00000108492	ENSMUSG00000004328	Hif3a	chr7:17031506-17062427	6.03753	0.747589	3.01364	5e-05	0.00413767
ENSMUST00000061628	ENSMUSG00000050505	Pcdh20	chr14:88464742-88471396	1.5246	0.18841	3.01648	5e-05	0.00413767
ENSMUST00000015664	ENSMUSG00000028111	Ctsk	chr3:95499255-95509362	83.1163	10.2482	3.01976	5e-05	0.00413767
ENSMUST00000100375	ENSMUSG00000041815	Poldip3	chr15:83125977-83149384	16.9557	2.07277	3.03214	0.0002	0.0133323
ENSMUST00000005548	ENSMUSG00000005413	Hmox1	chr8:75093620-75100589	131.437	15.8216	3.0544	5e-05	0.00413767
ENSMUST00000025582	ENSMUSG00000024679	Ms4a6d	chr19:11586603-11604849	32.3595	3.88213	3.05927	5e-05	0.00413767
ENSMUST00000054002	ENSMUSG00000053113	Socs3	chr11:117966078-117969186	102.684	12.2904	3.06261	5e-05	0.00413767
ENSMUST00000063690	ENSMUSG00000027068	Dhrs9	chr2:69380444-69404533	4.37807	0.519922	3.07393	5e-05	0.00413767
ENSMUST00000033821	ENSMUSG00000031444	F10	chr8:13037307-13056676	11.391	1.34034	3.08722	5e-05	0.00413767
ENSMUST00000032174	ENSMUSG00000030087	Klf15	chr6:90462575-90475238	81.363	9.28096	3.13203	5e-05	0.00413767
ENSMUST00000071065	ENSMUSG00000056749	Nfil3	chr13:52967208-52981073	23.9988	2.68333	3.16087	5e-05	0.00413767
ENSMUST00000021506	ENSMUSG00000021091	Serpina3n	chr12:104406728-104414329	184.838	20.0558	3.20417	5e-05	0.00413767
ENSMUST00000023250	ENSMUSG00000022586	Ly6i	chr15:74979533-74983430	13.1127	1.41267	3.21448	5e-05	0.00413767
ENSMUST00000063396	ENSMUSG00000061878	Sphk1	chr11:116529214-116536674	6.34111	0.675183	3.23138	5e-05	0.00413767
ENSMUST00000018610	ENSMUSG00000020826	Nos2	chr11:78920786-78960254	8.88942	0.938076	3.24431	5e-05	0.00413767
ENSMUST00000100222	ENSMUSG00000022534	Mefv	chr16:3707214-3718124	4.10191	0.431479	3.24893	5e-05	0.00413767
ENSMUST00000030677	ENSMUSG00000028862	Map3k6	chr4:133240817-133252929	37.7595	3.90789	3.27238	5e-05	0.00413767
ENSMUST00000023101	ENSMUSG00000022464	Slc38a4	chr15:96994822-97055956	38.3805	3.91105	3.29475	5e-05	0.00413767
ENSMUST00000022460	ENSMUSG00000021903	Galnt15	chr14:32028988-32062197	40.9447	4.16484	3.29734	5e-05	0.00413767
ENSMUST00000102894	ENSMUSG00000062593	Lilrb4a	chr10:51480678-51486219	30.4665	3.07795	3.30718	5e-05	0.00413767
ENSMUST00000042081	ENSMUSG00000040552	C3ar1	chr6:122847137-122856161	16.3145	1.64166	3.31293	5e-05	0.00413767
ENSMUST00000023520	ENSMUSG00000022824	Muc13	chr16:33794036-33819934	1.16111	0.115932	3.32416	5e-05	0.00413767
ENSMUST00000021757	ENSMUSG00000021322	Aoah	chr13:20794118-21024252	7.55806	0.751374	3.33041	5e-05	0.00413767
ENSMUST00000064821	ENSMUSG00000030786	Itgam	chr7:128062639-128128160	13.0601	1.29685	3.33208	5e-05	0.00413767
ENSMUST00000026911	ENSMUSG00000025804	Ccr1	chr9:123962123-123968692	28.9971	2.87497	3.33429	5e-05	0.00413767
ENSMUST00000017881	ENSMUSG00000017737	Mmp9	chr2:164940779-164955850	25.0077	2.4588	3.34635	5e-05	0.00413767
ENSMUST00000217643	ENSMUSG00000001348	Acp5	chr9:22126726-22135711	16.2183	1.53325	3.40296	0.0008	0.0401414
ENSMUST00000106561	ENSMUSG00000047798	Cd300lf	chr11:115091430-115162236	21.786	2.02443	3.42781	5e-05	0.00413767
ENSMUST00000031318	ENSMUSG00000029371	Cxcl5	chr5:90759377-90761624	13.2198	1.15544	3.51619	5e-05	0.00413767
ENSMUST00000024791	ENSMUSG00000023992	Trem2	chr17:48346400-48352273	15.9057	1.37264	3.53453	0.0001	0.00752154
ENSMUST00000024706	ENSMUSG00000023913	Pla2g7	chr17:43568097-43612201	54.2822	4.62333	3.55347	5e-05	0.00413767
ENSMUST00000021550	ENSMUSG00000021125	Arg2	chr12:79130776-79172667	23.902	1.98711	3.58838	0.0007	0.0362738
ENSMUST00000025409	ENSMUSG00000024529	Lox	chr18:52516068-52529867	85.7361	7.03789	3.60669	5e-05	0.00413767
ENSMUST00000022287	ENSMUSG00000021765	Fst	chr13:114452261-114458730	13.5654	1.10737	3.61472	5e-05	0.00413767
ENSMUST00000063278	ENSMUSG00000031980	Agt	chr8:124556533-124569706	3.05035	0.244363	3.64188	5e-05	0.00413767
ENSMUST00000002926	ENSMUSG00000002847	Pla1a	chr16:38396118-38433145	6.54227	0.520924	3.65065	5e-05	0.00413767
ENSMUST00000188995	ENSMUSG00000101389	Ms4a4a	chr19:11375522-11392790	32.1677	2.51956	3.67437	5e-05	0.00413767
ENSMUST00000164484	ENSMUSG00000090707	Gm8237	chr14:5857917-5880382	2.16202	0.165689	3.70583	5e-05	0.00413767
ENSMUST00000108653	ENSMUSG00000078817	Nlrp12	chr7:3218783-3249613	2.73302	0.206796	3.72421	5e-05	0.00413767
ENSMUST00000050785	ENSMUSG00000026822	Lcn2	chr2:32384632-32388252	1186.64	87.7945	3.75661	5e-05	0.00413767
ENSMUST00000035101	ENSMUSG00000032515	Csrnp1	chr9:119894877-120070622	51.1792	3.75433	3.76893	0.0002	0.0133323
ENSMUST00000027639	ENSMUSG00000026390	Marco	chr1:120474537-120505024	76.0887	5.53876	3.78005	5e-05	0.00413767
ENSMUST00000029297	ENSMUSG00000027737	Slc7a11	chr3:49892525-50443614	9.89115	0.708097	3.80412	5e-05	0.00413767
ENSMUST00000034215	ENSMUSG00000031765	Mt1	chr8:94179081-94180327	905.041	63.2528	3.83878	5e-05	0.00413767
ENSMUST00000031327	ENSMUSG00000029380	Cxcl1	chr5:90891240-90893115	12.1143	0.846368	3.83928	5e-05	0.00413767
ENSMUST00000067715	ENSMUSG00000054582	Pabpc1l	chr2:164025449-164050538	1.68469	0.113703	3.88914	0.00025	0.016035
ENSMUST00000003074	ENSMUSG00000002992	Apoc2	chr7:19671578-19681479	31.7555	2.1004	3.91827	5e-05	0.00413767
ENSMUST00000114792	ENSMUSG00000024222	Fkbp5	chr17:28399094-28517524	7.87645	0.508551	3.95308	0.00075	0.0382387
ENSMUST00000106386	ENSMUSG00000061878	Sphk1	chr11:116529214-116536674	15.1784	0.962596	3.97895	0.0003	0.0186561
ENSMUST00000075221	ENSMUSG00000058755	Osm	chr11:4236419-4241026	5.99271	0.372072	4.00956	5e-05	0.00413767
ENSMUST00000048782	ENSMUSG00000042265	Trem1	chr17:48232767-48246924	11.5217	0.712002	4.01633	5e-05	0.00413767
ENSMUST00000031840	ENSMUSG00000029816	Gpnmb	chr6:49036614-49070929	53.2288	3.24849	4.03436	5e-05	0.00413767
ENSMUST00000023806	ENSMUSG00000023045	Soat2	chr15:102150525-102163474	3.21317	0.193552	4.0532	5e-05	0.00413767
ENSMUST00000019074	ENSMUSG00000018930	Ccl4	chr11:83662583-83664683	24.4825	1.45914	4.06856	5e-05	0.00413767
ENSMUST00000025263	ENSMUSG00000024401	Tnf	chr17:35199380-35202007	14.9071	0.882446	4.07835	5e-05	0.00413767
ENSMUST00000064916	ENSMUSG00000062345	Serpinb2	chr1:107511422-107525598	2.4436	0.142218	4.10283	0.0004	0.0235705
ENSMUST00000063956	ENSMUSG00000052212	Cd177	chr7:24743982-24760311	23.6326	1.37161	4.10684	5e-05	0.00413767
ENSMUST00000023829	ENSMUSG00000023067	Cdkn1a	chr17:29090978-29100722	296.343	16.966	4.12655	5e-05	0.00413767
ENSMUST00000020308	ENSMUSG00000020108	Ddit4	chr10:59949674-59951770	120.66	6.73206	4.16375	5e-05	0.00413767
ENSMUST00000066905	ENSMUSG00000030077	Chl1	chr6:103510585-103750211	2.11359	0.115396	4.19503	0.00035	0.0211828
ENSMUST00000106899	ENSMUSG00000026180	Cxcr2	chr1:74153988-74161246	27.8902	1.4817	4.23443	5e-05	0.00413767
ENSMUST00000022592	ENSMUSG00000022015	Tnfsf11	chr14:78277444-78308043	1.71941	0.0891522	4.2695	0.00025	0.016035
ENSMUST00000079413	ENSMUSG00000024222	Fkbp5	chr17:28399094-28517524	84.9054	3.84048	4.4665	5e-05	0.00413767
ENSMUST00000020161	ENSMUSG00000019987	Arg1	chr10:24915207-24927470	45.8399	1.66898	4.77956	5e-05	0.00413767
ENSMUST00000070832	ENSMUSG00000051748	Wfdc21	chr11:83746939-83752642	249.233	8.59995	4.85702	5e-05	0.00413767
ENSMUST00000030044	ENSMUSG00000039196	Orm1	chr4:63344559-63348163	35.0123	1.11954	4.96688	5e-05	0.00413767
ENSMUST00000034214	ENSMUSG00000031762	Mt2	chr8:94172663-94173568	1006.88	29.948	5.07129	5e-05	0.00413767
ENSMUST00000035061	ENSMUSG00000032484	Ngp	chr9:110419746-110423012	34.0101	0.998964	5.08938	5e-05	0.00413767
ENSMUST00000028881	ENSMUSG00000027398	Il1b	chr2:129364569-129375748	156.644	4.49309	5.12364	5e-05	0.00413767
ENSMUST00000018765	ENSMUSG00000005800	Mmp8	chr9:7558455-7568485	39.8347	1.07984	5.20513	5e-05	0.00413767
ENSMUST00000032240	ENSMUSG00000030144	Clec4d	chr6:123262116-123275265	49.1088	1.27756	5.26452	5e-05	0.00413767
ENSMUST00000023840	ENSMUSG00000023078	Cxcl13	chr5:95956950-95961068	69.6668	1.7239	5.33672	5e-05	0.00413767
ENSMUST00000069960	ENSMUSG00000056071	S100a9	chr3:90692631-90695721	1866.11	40.8945	5.51198	5e-05	0.00413767
ENSMUST00000092836	ENSMUSG00000069792	Wfdc17	chr11:83703990-83706268	461.596	10.112	5.5125	5e-05	0.00413767
ENSMUST00000032239	ENSMUSG00000030142	Clec4e	chr6:123281788-123289870	33.0124	0.70905	5.54098	5e-05	0.00413767
ENSMUST00000117167	ENSMUSG00000056071	S100a9	chr3:90692631-90695721	471.914	9.97498	5.56407	5e-05	0.00413767
ENSMUST00000065666	ENSMUSG00000022651	Retnlg	chr16:48872607-48874498	249.951	5.23256	5.57799	5e-05	0.00413767
ENSMUST00000069927	ENSMUSG00000056054	S100a8	chr3:90668977-90670035	1382.54	24.6895	5.80728	5e-05	0.00413767
ENSMUST00000101078	ENSMUSG00000079012	Serpina3m	chr12:104338485-104394257	17.9147	0.303391	5.88382	5e-05	0.00413767
ENSMUST00000043400	ENSMUSG00000033508	Asprv1	chr6:86628163-86629710	39.6864	0.601301	6.04441	5e-05	0.00413767
ENSMUST00000021209	ENSMUSG00000020848	Doc2b	chr11:75768965-75825241	19.9014	0.26635	6.2234	5e-05	0.00413767
ENSMUST00000001008	ENSMUSG00000000982	Ccl3	chr11:83647843-83650668	91.7332	0.982925	6.54422	5e-05	0.00413767
ENSMUST00000079184	ENSMUSG00000059657	Stfa2l1	chr16:36156810-36161948	188.047	1.66977	6.8153	5e-05	0.00413767
ENSMUST00000114858	ENSMUSG00000079597	Gm5483	chr16:36184211-36188111	171.492	1.29591	7.04804	5e-05	0.00413767
ENSMUST00000027243	ENSMUSG00000026073	Il1r2	chr1:40074078-40125231	69.1786	0.266784	8.01851	5e-05	0.00413767
ENSMUST00000006956	ENSMUSG00000040026	Saa3	chr7:46711997-46715700	4966.81	2.97664	10.7044	5e-05	0.00413767
ENSMUST00000039046	ENSMUSG00000041872	Il17f	chr1:20777145-20790617	0.537658	0	inf	5e-05	0.00413767
ENSMUST00000096089	ENSMUSG00000071561	BC100530	chr16:36359381-36367748	49.4539	0	inf	5e-05	0.00413767
ENSMUST00000031356	ENSMUSG00000029409	U90926	chr5:92209892-92215408	1.88864	0	inf	5e-05	0.00413767
ENSMUST00000023619	ENSMUSG00000022902	Stfa2	chr16:36403945-36408363	128.507	0	inf	5e-05	0.00413767
ENSMUST00000034488	ENSMUSG00000047562	Mmp10	chr9:7502351-7510240	1.90643	0	inf	5e-05	0.00413767
ENSMUST00000089628	ENSMUSG00000094733	Gm5416	chr16:36210402-36217788	5.47497	0	inf	5e-05	0.00413767
ENSMUST00000068182	ENSMUSG00000054905	Stfa3	chr16:36450536-36455392	48.2753	0	inf	5e-05	0.00413767
ENSMUST00000114850	ENSMUSG00000079594	BC117090	chr16:36321664-36334332	1.13744	0	inf	0.00055	0.0301111
