# Supplementary material for: Landscape of transcription and long non-coding RNAs reveals new insights into the inflammatory and fibrotic response following ventilator-induced lung injury
Source: Respir Res. 2018 Jun 22;19:122. doi: 10.1186/s12931-018-0822-z (PMC6013938; doi:10.1186/s12931-018-0822-z)
Supplement: Supplementary file 4 — Table S2. The entire list of dysregulated transcription factors (TFs) in the comparisons of each pair. (XLSX 62 kb) [file 12931_2018_822_MOESM4_ESM.xlsx]

## Sheet: 0d Vs Sham
The detail information of dysregulated differntially expressed transcription factors in the comparison between sham and VILI group on day 0
Transcript ID	Gene ID	Gene symbol		Gene location	VILI day 0 FPKM	Sham FPKM	Log2 (Fold Change)	p-value	q-value
ENSMUST00000105590	ENSMUSG00000019768	Esr1		chr10:4611988-5005614	0.529805	1.49512	-1.49673	0.0004	0.0235705
ENSMUST00000055619	ENSMUSG00000043099	Hic1		chr11:75164564-75169519	3.62325	9.23341	-1.34958	5e-05	0.00413767
ENSMUST00000041183	ENSMUSG00000036144	Meox2		chr12:37108539-37179534	6.11897	12.3634	-1.01471	0.0002	0.0133323
ENSMUST00000042054	ENSMUSG00000038402	Foxf2		chr13:31625815-31631403	9.98025	20.0554	-1.00684	5e-05	0.00413767
ENSMUST00000093852	ENSMUSG00000066687	Zbtb16		chr9:48654296-48836222	110.648	12.2887	3.17057	5e-05	0.00413767
ENSMUST00000108492	ENSMUSG00000004328	Hif3a		chr7:17031506-17062427	5.45776	0.747589	2.86799	5e-05	0.00413767
ENSMUST00000032174	ENSMUSG00000030087	Klf15		chr6:90462575-90475238	52.2844	9.28096	2.49404	5e-05	0.00413767
ENSMUST00000006818	ENSMUSG00000006642	Tcf23		chr5:30968661-30977018	2.4104	0.44621	2.43347	5e-05	0.00413767
ENSMUST00000071065	ENSMUSG00000056749	Nfil3		chr13:52967208-52981073	13.3264	2.68333	2.31219	5e-05	0.00413767
ENSMUST00000001184	ENSMUSG00000001156	Mxd1		chr6:86647041-86669161	31.1026	8.86751	1.81043	5e-05	0.00413767
ENSMUST00000096350	ENSMUSG00000042622	Maff		chr15:79347540-79359072	14.6995	4.3569	1.75439	5e-05	0.00413767
ENSMUST00000047321	ENSMUSG00000055116	Arntl		chr7:113207464-113314126	9.73218	2.93172	1.73101	5e-05	0.00413767
ENSMUST00000031017	ENSMUSG00000029135	Fosl2		chr5:32135800-32157842	40.7645	13.6431	1.57914	5e-05	0.00413767
ENSMUST00000056815	ENSMUSG00000026077	Npas2		chr1:39193730-39363236	3.62155	1.26536	1.51706	5e-05	0.00413767
ENSMUST00000027941	ENSMUSG00000026628	Atf3		chr1:191170295-191218039	7.50166	2.68776	1.4808	5e-05	0.00413767
ENSMUST00000064922	ENSMUSG00000052837	Junb		chr8:84976909-84978718	75.6794	27.6194	1.45422	5e-05	0.00413767
ENSMUST00000036884	ENSMUSG00000033863	Klf9		chr19:23141225-23166911	112.802	41.2206	1.45236	5e-05	0.00413767
ENSMUST00000023779	ENSMUSG00000023034	Nr4a1		chr15:101266845-101274792	29.3586	10.9536	1.42238	5e-05	0.00413767
ENSMUST00000021674	ENSMUSG00000021250	Fos		chr12:85473889-85477273	42.7194	17.1038	1.32057	5e-05	0.00413767
ENSMUST00000105502	ENSMUSG00000048756	Foxo3		chr10:42181840-42276755	63.0435	25.609	1.2997	5e-05	0.00413767
ENSMUST00000070642	ENSMUSG00000056501	Cebpb		chr2:167688914-167690418	101.113	47.6289	1.08606	5e-05	0.00413767
ENSMUST00000068237	ENSMUSG00000038342	Mlxip		chr5:123393648-123457932	26.9719	13.2067	1.03019	5e-05	0.00413767
ENSMUST00000042701	ENSMUSG00000037235	Mxd4		chr5:34173886-34187720	103.605	51.3647	1.01224	5e-05	0.00413767

## Sheet: 7d Vs 0d
The detail information of dysregulated differentially expressed transcription factors in the comparison between day 7 and day 0 in the VILI group
Transcript ID	Gene ID	Gene symbol	Gene location	VILI 7d FPKM	VILI day 0 FPKM	Log2 (Fold Change)	p-value	q-value
ENSMUST00000030782	ENSMUSG00000028940	Hes2	chr4:152158866-152162469	0.209006	0.957954	-2.19641	0.00065	0.0342624
ENSMUST00000014174	ENSMUSG00000014030	Pax5	chr4:44524756-44710487	0.613024	2.25369	-1.87827	5e-05	0.00413767
ENSMUST00000023356	ENSMUSG00000022676	Snai2	chr16:14705851-14709395	2.13313	6.61379	-1.63251	5e-05	0.00413767
ENSMUST00000099449	ENSMUSG00000074867	Zfp808	chr13:62129915-62173419	0.71427	2.21435	-1.63234	0.00045	0.0259452
ENSMUST00000103141	ENSMUSG00000018168	Ikzf3	chr11:98464901-98545800	2.20694	5.98363	-1.43897	5e-05	0.00413767
ENSMUST00000073312	ENSMUSG00000067928	Zfp760	chr17:21707740-21725636	2.60618	5.79044	-1.15174	5e-05	0.00413767
ENSMUST00000099126	ENSMUSG00000074622	Mafb	chr2:160363702-160367065	16.9696	3.80498	2.15699	5e-05	0.00413767
ENSMUST00000019997	ENSMUSG00000019850	Tnfaip3	chr10:19000909-19015657	28.6633	9.01054	1.66952	5e-05	0.00413767
ENSMUST00000032194	ENSMUSG00000030103	Bhlhe40	chr6:108660628-108666925	47.1347	17.66	1.4163	5e-05	0.00413767
ENSMUST00000055619	ENSMUSG00000043099	Hic1	chr11:75164564-75169519	8.44365	3.62325	1.22058	5e-05	0.00413767
ENSMUST00000052631	ENSMUSG00000042821	Snai1	chr2:167538194-167542814	12.2975	5.44468	1.17544	0.00015	0.0105044
ENSMUST00000096350	ENSMUSG00000042622	Maff	chr15:79347540-79359072	31.8538	14.6995	1.1157	0.0008	0.0401414
ENSMUST00000031017	ENSMUSG00000029135	Fosl2	chr5:32135800-32157842	84.2566	40.7645	1.04748	0.00025	0.016035
ENSMUST00000051209	ENSMUSG00000002265	Peg3	chr7:6703891-6730421	12.0532	5.85852	1.0408	5e-05	0.00413767
ENSMUST00000071233	ENSMUSG00000058881	Zfp516	chr18:82910878-83005314	16.6533	8.12817	1.03481	0.00015	0.0105044

## Sheet: 7d Vs Sham
The detail information of dysregulated differentially expressed transcription factors in the comparison between sham and VILI group on day 7
Transcript ID	Gene ID	Gene symbol	Gene location	VILI7d FPKM	Sham FPKM	Log2 (Fold Change)	p-value	q-value
ENSMUST00000035020	ENSMUSG00000032446	Eomes	chr9:118478211-118486132	0.06164	0.619907	-3.33011	0.0008	0.0401414
ENSMUST00000030782	ENSMUSG00000028940	Hes2	chr4:152158866-152162469	0.209006	1.69356	-3.01844	5e-05	0.00413767
ENSMUST00000109514	ENSMUSG00000000861	Bcl11a	chr11:24078055-24174123	0.275432	1.45121	-2.39749	5e-05	0.00413767
ENSMUST00000014174	ENSMUSG00000014030	Pax5	chr4:44524756-44710487	0.613024	2.86629	-2.22517	5e-05	0.00413767
ENSMUST00000062765	ENSMUSG00000030443	Zfp583	chr7:6315659-6331285	0.356247	1.64842	-2.21013	0.00065	0.0342624
ENSMUST00000099449	ENSMUSG00000074867	Zfp808	chr13:62129915-62173419	0.71427	2.77131	-1.95603	5e-05	0.00413767
ENSMUST00000069292	ENSMUSG00000030145	Zfp248	chr6:118427318-118455528	0.40776	1.57946	-1.95364	0.00025	0.016035
ENSMUST00000001484	ENSMUSG00000001444	Tbx21	chr11:97098070-97115331	0.319209	1.13174	-1.82597	0.0008	0.0401414
ENSMUST00000091481	ENSMUSG00000069184	Zfp72	chr13:74371425-74376566	0.917525	3.2506	-1.82489	0.0002	0.0133323
ENSMUST00000105590	ENSMUSG00000019768	Esr1	chr10:4611988-5005614	0.437873	1.49512	-1.77168	5e-05	0.00413767
ENSMUST00000103141	ENSMUSG00000018168	Ikzf3	chr11:98464901-98545800	2.20694	7.48113	-1.76121	5e-05	0.00413767
ENSMUST00000073312	ENSMUSG00000067928	Zfp760	chr17:21707740-21725636	2.60618	8.18021	-1.6502	5e-05	0.00413767
ENSMUST00000037565	ENSMUSG00000066000	Zfp979	chr4:147611936-147642513	0.963138	2.81963	-1.54969	0.0001	0.00752154
ENSMUST00000098509	ENSMUSG00000074166	AW146154	chr7:41478873-41499890	1.34897	3.87901	-1.52383	5e-05	0.00413767
ENSMUST00000109060	ENSMUSG00000090093	Gm14399	chr2:175129492-175142012	2.20405	6.22696	-1.49837	0.0002	0.0133323
ENSMUST00000023356	ENSMUSG00000022676	Snai2	chr16:14705851-14709395	2.13313	6.00683	-1.49363	5e-05	0.00413767
ENSMUST00000040667	ENSMUSG00000031079	Zfp300	chrX:21079173-21089229	0.49359	1.34202	-1.44303	0.0004	0.0235705
ENSMUST00000102976	ENSMUSG00000015619	Gata3	chr2:9857077-9890034	2.96933	7.97148	-1.42471	5e-05	0.00413767
ENSMUST00000108959	ENSMUSG00000078868	Gm14412	chr2:177314519-177324307	1.55452	4.17159	-1.42413	0.001	0.0477064
ENSMUST00000108947	ENSMUSG00000094786	Gm14403	chr2:177498314-177509763	3.62344	9.59351	-1.4047	0.0006	0.0322352
ENSMUST00000041183	ENSMUSG00000036144	Meox2	chr12:37108539-37179534	4.71759	12.3634	-1.38995	5e-05	0.00413767
ENSMUST00000084141	ENSMUSG00000069743	Zfp820	chr17:21816875-21845759	1.45648	3.69662	-1.34372	0.0001	0.00752154
ENSMUST00000015771	ENSMUSG00000015627	Gata5	chr2:180325132-180334699	1.69583	4.27526	-1.33402	5e-05	0.00413767
ENSMUST00000057070	ENSMUSG00000078995	Zfp456	chr13:67362112-67375810	0.904311	2.25048	-1.31534	0.00045	0.0259452
ENSMUST00000049454	ENSMUSG00000040841	Six5	chr7:19094593-19098549	2.44663	6.08763	-1.31509	0.00015	0.0105044
ENSMUST00000042054	ENSMUSG00000038402	Foxf2	chr13:31625815-31631403	8.12947	20.0554	-1.30276	5e-05	0.00413767
ENSMUST00000081022	ENSMUSG00000062861	Zfp28	chr7:6383294-6396915	1.10805	2.70613	-1.28821	0.00015	0.0105044
ENSMUST00000049930	ENSMUSG00000045680	Tcf21	chr10:22817278-22823650	20.4145	48.3043	-1.24256	5e-05	0.00413767
ENSMUST00000107992	ENSMUSG00000069727	Zfp975	chr7:42660104-42692718	2.36235	5.57133	-1.2378	0.0002	0.0133323
ENSMUST00000108336	ENSMUSG00000037640	Zfp60	chr7:27731388-27753702	1.74673	4.02549	-1.20451	0.00065	0.0342624
ENSMUST00000097877	ENSMUSG00000061894	Zscan20	chr4:128583546-128610098	0.900975	2.07216	-1.20157	0.00055	0.0301111
ENSMUST00000064659	ENSMUSG00000052676	Zmat1	chrX:134971371-135009209	1.52176	3.45008	-1.18089	0.0005	0.0280447
ENSMUST00000116436	ENSMUSG00000019256	Ahr	chr12:35497973-35535038	19.8192	44.1913	-1.15686	5e-05	0.00413767
ENSMUST00000009877	ENSMUSG00000009733	Tfcp2	chr15:100502798-100552008	2.16245	4.76951	-1.14117	0.00085	0.0421601
ENSMUST00000052837	ENSMUSG00000046532	Ar	chrX:98148768-98323215	1.56335	3.40281	-1.12208	5e-05	0.00413767
ENSMUST00000115557	ENSMUSG00000058192	Zfp846	chr9:20581324-20605409	0.732678	1.59068	-1.11839	0.0003	0.0186561
ENSMUST00000098614	ENSMUSG00000071064	Zfp827	chr8:79028436-79193766	1.8678	3.91346	-1.0671	0.0007	0.0362738
ENSMUST00000114561	ENSMUSG00000068551	Zfp467	chr6:48427696-48445825	4.38997	9.08009	-1.04849	0.00045	0.0259452
ENSMUST00000108949	ENSMUSG00000089756	Zfp966	chr2:175918880-175931100	3.69601	7.50945	-1.02274	0.0004	0.0235705
ENSMUST00000082136	ENSMUSG00000059436	Max	chr12:76937268-76962248	36.295	17.5772	1.04607	0.0003	0.0186561
ENSMUST00000000080	ENSMUSG00000000078	Klf6	chr13:5861488-5870393	115.971	55.0811	1.07413	5e-05	0.00413767
ENSMUST00000008537	ENSMUSG00000008393	Carhsp1	chr16:8658586-8672153	64.2705	29.5793	1.11957	5e-05	0.00413767
ENSMUST00000021674	ENSMUSG00000021250	Fos	chr12:85473889-85477273	37.9585	17.1038	1.1501	5e-05	0.00413767
ENSMUST00000051209	ENSMUSG00000002265	Peg3	chr7:6703891-6730421	12.0532	5.42151	1.15264	5e-05	0.00413767
ENSMUST00000105502	ENSMUSG00000048756	Foxo3	chr10:42181840-42276755	57.1789	25.609	1.15883	5e-05	0.00413767
ENSMUST00000071233	ENSMUSG00000058881	Zfp516	chr18:82910878-83005314	16.6533	7.36057	1.17792	0.0001	0.00752154
ENSMUST00000063694	ENSMUSG00000052040	Klf13	chr7:63886350-63938915	91.7372	39.3319	1.22181	5e-05	0.00413767
ENSMUST00000047321	ENSMUSG00000055116	Arntl	chr7:113207464-113314126	6.98496	2.93172	1.2525	0.0001	0.00752154
ENSMUST00000050687	ENSMUSG00000034271	Jdp2	chr12:85599104-85639878	26.0494	10.7609	1.27545	5e-05	0.00413767
ENSMUST00000038368	ENSMUSG00000042745	Id1	chr2:152736250-152737410	165.69	67.5059	1.2954	5e-05	0.00413767
ENSMUST00000067912	ENSMUSG00000055148	Klf2	chr8:72319032-72321656	190.54	76.5643	1.31535	5e-05	0.00413767
ENSMUST00000095267	ENSMUSG00000071076	Jund	chr8:70698948-70700616	119.508	47.7612	1.3232	5e-05	0.00413767
ENSMUST00000081964	ENSMUSG00000059325	Hopx	chr5:77086987-77115121	548.042	216.818	1.3378	0.0002	0.0133323
ENSMUST00000032194	ENSMUSG00000030103	Bhlhe40	chr6:108660628-108666925	47.1347	18.3811	1.35856	5e-05	0.00413767
ENSMUST00000002180	ENSMUSG00000002111	Spi1	chr2:91082389-91115756	24.3686	8.09301	1.59027	5e-05	0.00413767
ENSMUST00000018287	ENSMUSG00000018143	Mafk	chr5:139791512-139826885	51.1807	16.8525	1.60264	5e-05	0.00413767
ENSMUST00000107619	ENSMUSG00000003032	Klf4	chr4:55527142-55532466	106.298	32.4866	1.7102	5e-05	0.00413767
ENSMUST00000070642	ENSMUSG00000056501	Cebpb	chr2:167688914-167690418	175.029	47.6289	1.87768	5e-05	0.00413767
ENSMUST00000036884	ENSMUSG00000033863	Klf9	chr19:23141225-23166911	172.4	41.2206	2.06432	5e-05	0.00413767
ENSMUST00000001184	ENSMUSG00000001156	Mxd1	chr6:86647041-86669161	41.1952	8.86751	2.21587	5e-05	0.00413767
ENSMUST00000099126	ENSMUSG00000074622	Mafb	chr2:160363702-160367065	16.9696	3.63676	2.22223	5e-05	0.00413767
ENSMUST00000019997	ENSMUSG00000019850	Tnfaip3	chr10:19000909-19015657	28.6633	6.12883	2.22552	5e-05	0.00413767
ENSMUST00000023779	ENSMUSG00000023034	Nr4a1	chr15:101266845-101274792	52.5421	10.9536	2.26207	5e-05	0.00413767
ENSMUST00000030025	ENSMUSG00000028341	Nr4a3	chr4:48045152-48086447	3.94169	0.770551	2.35485	5e-05	0.00413767
ENSMUST00000027941	ENSMUSG00000026628	Atf3	chr1:191170295-191218039	14.3068	2.68776	2.41222	5e-05	0.00413767
ENSMUST00000064922	ENSMUSG00000052837	Junb	chr8:84976909-84978718	148.059	27.6194	2.42242	5e-05	0.00413767
ENSMUST00000006818	ENSMUSG00000006642	Tcf23	chr5:30968661-30977018	2.4735	0.44621	2.47076	5e-05	0.00413767
ENSMUST00000031017	ENSMUSG00000029135	Fosl2	chr5:32135800-32157842	84.2566	13.6431	2.62662	5e-05	0.00413767
ENSMUST00000004473	ENSMUSG00000004359	Spic	chr10:88674771-88685015	1.16719	0.18235	2.67826	0.00065	0.0342624
ENSMUST00000093852	ENSMUSG00000066687	Zbtb16	chr9:48654296-48836222	83.2974	12.2887	2.76093	5e-05	0.00413767
ENSMUST00000096350	ENSMUSG00000042622	Maff	chr15:79347540-79359072	31.8538	4.3569	2.87009	5e-05	0.00413767
ENSMUST00000108492	ENSMUSG00000004328	Hif3a	chr7:17031506-17062427	6.03753	0.747589	3.01364	5e-05	0.00413767
ENSMUST00000032174	ENSMUSG00000030087	Klf15	chr6:90462575-90475238	81.363	9.28096	3.13203	5e-05	0.00413767
ENSMUST00000071065	ENSMUSG00000056749	Nfil3	chr13:52967208-52981073	23.9988	2.68333	3.16087	5e-05	0.00413767
