# Supplementary material for: Landscape of transcription and long non-coding RNAs reveals new insights into the inflammatory and fibrotic response following ventilator-induced lung injury
Source: Respir Res. 2018 Jun 22;19:122. doi: 10.1186/s12931-018-0822-z (PMC6013938; doi:10.1186/s12931-018-0822-z)
Supplement: Supplementary file 6 — Table S3. The entire list of significant dysregulated GO terms of DE mRNAs in the comparisons of each pair. (XLSX 1870 kb) [file 12931_2018_822_MOESM6_ESM.xlsx]

## Sheet: 0d Vs Sham
Biological Processes Analysis for indicating the dysregulated GO terms in the comparison between sham and VILI group on day 0
#Term	Database	ID	Input number	Background number	P-Value	Corrected P-Value	Input	Hyperlink
response to stimulus	Gene Ontology	GO:0050896	162	6172	9.68826e-23	5.18709e-19	ENSMUSG00000053199|ENSMUSG00000049892|ENSMUSG00000031770|ENSMUSG00000024190|ENSMUSG00000027398|ENSMUSG00000045730|ENSMUSG00000019577|ENSMUSG00000008845|ENSMUSG00000027843|ENSMUSG00000052837|ENSMUSG00000040907|ENSMUSG00000020387|ENSMUSG00000017707|ENSMUSG00000053113|ENSMUSG00000063632|ENSMUSG00000020593|ENSMUSG00000027947|ENSMUSG00000010797|ENSMUSG00000030351|ENSMUSG00000024042|ENSMUSG00000020427|…	http://amigo.geneontology.org/cgi-bin/amigo/term_details?term=GO:0050896
cellular response to stimulus	Gene Ontology	GO:0051716	134	5047	4.1956e-18	6.36159e-15	ENSMUSG00000053199|ENSMUSG00000049892|ENSMUSG00000031770|ENSMUSG00000027398|ENSMUSG00000019577|ENSMUSG00000027843|ENSMUSG00000052837|ENSMUSG00000040907|ENSMUSG00000020387|ENSMUSG00000017707|ENSMUSG00000053113|ENSMUSG00000063632|ENSMUSG00000020593|ENSMUSG00000027947|ENSMUSG00000010797|ENSMUSG00000030351|ENSMUSG00000024042|ENSMUSG00000020427|ENSMUSG00000032496|ENSMUSG00000046743|ENSMUSG00000045502|…	http://amigo.geneontology.org/cgi-bin/amigo/term_details?term=GO:0051716
response to stress	Gene Ontology	GO:0006950	92	2705	4.22971e-18	6.36159e-15	ENSMUSG00000020053|ENSMUSG00000031770|ENSMUSG00000031762|ENSMUSG00000019577|ENSMUSG00000008845|ENSMUSG00000027843|ENSMUSG00000017707|ENSMUSG00000053113|ENSMUSG00000020893|ENSMUSG00000020423|ENSMUSG00000032496|ENSMUSG00000030474|ENSMUSG00000027398|ENSMUSG00000009628|ENSMUSG00000031765|ENSMUSG00000056071|ENSMUSG00000017737|ENSMUSG00000023067|ENSMUSG00000026628|ENSMUSG00000019768|ENSMUSG00000020108|…	http://amigo.geneontology.org/cgi-bin/amigo/term_details?term=GO:0006950
response to chemical	Gene Ontology	GO:0042221	92	2710	4.75277e-18	6.36159e-15	ENSMUSG00000031770|ENSMUSG00000031762|ENSMUSG00000045730|ENSMUSG00000019577|ENSMUSG00000027843|ENSMUSG00000052837|ENSMUSG00000040907|ENSMUSG00000053113|ENSMUSG00000063632|ENSMUSG00000020593|ENSMUSG00000027947|ENSMUSG00000024042|ENSMUSG00000032496|ENSMUSG00000046743|ENSMUSG00000027398|ENSMUSG00000031765|ENSMUSG00000035828|ENSMUSG00000028211|ENSMUSG00000027015|ENSMUSG00000056071|ENSMUSG00000017737|…	http://amigo.geneontology.org/cgi-bin/amigo/term_details?term=GO:0042221
cell communication	Gene Ontology	GO:0007154	123	4414	6.11877e-18	6.55198e-15	ENSMUSG00000053199|ENSMUSG00000049892|ENSMUSG00000031770|ENSMUSG00000031762|ENSMUSG00000019577|ENSMUSG00000027843|ENSMUSG00000040907|ENSMUSG00000020387|ENSMUSG00000017707|ENSMUSG00000053113|ENSMUSG00000041479|ENSMUSG00000063632|ENSMUSG00000027947|ENSMUSG00000010797|ENSMUSG00000030351|ENSMUSG00000024042|ENSMUSG00000020427|ENSMUSG00000032496|ENSMUSG00000046743|ENSMUSG00000045502|ENSMUSG00000034936|…	http://amigo.geneontology.org/cgi-bin/amigo/term_details?term=GO:0007154
regulation of cell death	Gene Ontology	GO:0010941	61	1353	4.03698e-17	3.1285e-14	ENSMUSG00000020427|ENSMUSG00000024066|ENSMUSG00000028128|ENSMUSG00000030093|ENSMUSG00000019970|ENSMUSG00000030790|ENSMUSG00000029304|ENSMUSG00000031770|ENSMUSG00000056501|ENSMUSG00000058755|ENSMUSG00000078817|ENSMUSG00000053965|ENSMUSG00000033685|ENSMUSG00000048756|ENSMUSG00000052837|ENSMUSG00000017707|ENSMUSG00000046223|ENSMUSG00000031431|ENSMUSG00000045730|ENSMUSG00000078566|ENSMUSG00000053113|…	http://amigo.geneontology.org/cgi-bin/amigo/term_details?term=GO:0010941
biological regulation	Gene Ontology	GO:0065007	187	8737	4.09031e-17	3.1285e-14	ENSMUSG00000053199|ENSMUSG00000000901|ENSMUSG00000049892|ENSMUSG00000032661|ENSMUSG00000058624|ENSMUSG00000031770|ENSMUSG00000036144|ENSMUSG00000057719|ENSMUSG00000045730|ENSMUSG00000019577|ENSMUSG00000003484|ENSMUSG00000027843|ENSMUSG00000052837|ENSMUSG00000040907|ENSMUSG00000020387|ENSMUSG00000056602|ENSMUSG00000017707|ENSMUSG00000053113|ENSMUSG00000041479|ENSMUSG00000055116|ENSMUSG00000063632|…	http://amigo.geneontology.org/cgi-bin/amigo/term_details?term=GO:0065007
regulation of biological process	Gene Ontology	GO:0050789	180	8311	1.14499e-16	7.26703e-14	ENSMUSG00000053199|ENSMUSG00000000901|ENSMUSG00000049892|ENSMUSG00000032661|ENSMUSG00000058624|ENSMUSG00000031770|ENSMUSG00000036144|ENSMUSG00000057719|ENSMUSG00000045730|ENSMUSG00000019577|ENSMUSG00000003484|ENSMUSG00000027843|ENSMUSG00000052837|ENSMUSG00000040907|ENSMUSG00000020387|ENSMUSG00000056602|ENSMUSG00000017707|ENSMUSG00000053113|ENSMUSG00000041479|ENSMUSG00000055116|ENSMUSG00000063632|…	http://amigo.geneontology.org/cgi-bin/amigo/term_details?term=GO:0050789
cell death	Gene Ontology	GO:0008219	68	1692	1.2638e-16	7.26703e-14	ENSMUSG00000020427|ENSMUSG00000024066|ENSMUSG00000028128|ENSMUSG00000030093|ENSMUSG00000019970|ENSMUSG00000030790|ENSMUSG00000029304|ENSMUSG00000049001|ENSMUSG00000031770|ENSMUSG00000056501|ENSMUSG00000058755|ENSMUSG00000078817|ENSMUSG00000053965|ENSMUSG00000019851|ENSMUSG00000033685|ENSMUSG00000021886|ENSMUSG00000048756|ENSMUSG00000052837|ENSMUSG00000043099|ENSMUSG00000017707|ENSMUSG00000046223|…	http://amigo.geneontology.org/cgi-bin/amigo/term_details?term=GO:0008219
single organism signaling	Gene Ontology	GO:0044700	119	4356	1.37055e-16	7.26703e-14	ENSMUSG00000053199|ENSMUSG00000049892|ENSMUSG00000031770|ENSMUSG00000031762|ENSMUSG00000019577|ENSMUSG00000027843|ENSMUSG00000040907|ENSMUSG00000020387|ENSMUSG00000017707|ENSMUSG00000053113|ENSMUSG00000041479|ENSMUSG00000063632|ENSMUSG00000027947|ENSMUSG00000010797|ENSMUSG00000030351|ENSMUSG00000024042|ENSMUSG00000020427|ENSMUSG00000032496|ENSMUSG00000046743|ENSMUSG00000045502|ENSMUSG00000034936|…	http://amigo.geneontology.org/cgi-bin/amigo/term_details?term=GO:0044700
signaling	Gene Ontology	GO:0023052	119	4363	1.54713e-16	7.26703e-14	ENSMUSG00000053199|ENSMUSG00000049892|ENSMUSG00000031770|ENSMUSG00000031762|ENSMUSG00000019577|ENSMUSG00000027843|ENSMUSG00000040907|ENSMUSG00000020387|ENSMUSG00000017707|ENSMUSG00000053113|ENSMUSG00000041479|ENSMUSG00000063632|ENSMUSG00000027947|ENSMUSG00000010797|ENSMUSG00000030351|ENSMUSG00000024042|ENSMUSG00000020427|ENSMUSG00000032496|ENSMUSG00000046743|ENSMUSG00000045502|ENSMUSG00000034936|…	http://amigo.geneontology.org/cgi-bin/amigo/term_details?term=GO:0023052
cellular response to chemical stimulus	Gene Ontology	GO:0070887	72	1883	1.62877e-16	7.26703e-14	ENSMUSG00000058818|ENSMUSG00000038332|ENSMUSG00000045613|ENSMUSG00000042834|ENSMUSG00000005320|ENSMUSG00000028211|ENSMUSG00000045730|ENSMUSG00000024042|ENSMUSG00000029304|ENSMUSG00000049001|ENSMUSG00000031770|ENSMUSG00000060063|ENSMUSG00000058755|ENSMUSG00000027398|ENSMUSG00000055116|ENSMUSG00000005824|ENSMUSG00000033685|ENSMUSG00000048756|ENSMUSG00000042265|ENSMUSG00000027843|ENSMUSG00000052837|…	http://amigo.geneontology.org/cgi-bin/amigo/term_details?term=GO:0070887
single-organism process	Gene Ontology	GO:0044699	206	10288	2.00982e-16	7.95415e-14	ENSMUSG00000053199|ENSMUSG00000025509|ENSMUSG00000000901|ENSMUSG00000049892|ENSMUSG00000058624|ENSMUSG00000031770|ENSMUSG00000036144|ENSMUSG00000027398|ENSMUSG00000019577|ENSMUSG00000003484|ENSMUSG00000027843|ENSMUSG00000052837|ENSMUSG00000040907|ENSMUSG00000020387|ENSMUSG00000056602|ENSMUSG00000017707|ENSMUSG00000053113|ENSMUSG00000041479|ENSMUSG00000055116|ENSMUSG00000063632|ENSMUSG00000020593|…	http://amigo.geneontology.org/cgi-bin/amigo/term_details?term=GO:0044699
regulation of cellular process	Gene Ontology	GO:0050794	173	7861	2.0799e-16	7.95415e-14	ENSMUSG00000053199|ENSMUSG00000000901|ENSMUSG00000049892|ENSMUSG00000032661|ENSMUSG00000058624|ENSMUSG00000031770|ENSMUSG00000036144|ENSMUSG00000057719|ENSMUSG00000045730|ENSMUSG00000019577|ENSMUSG00000027843|ENSMUSG00000052837|ENSMUSG00000040907|ENSMUSG00000020387|ENSMUSG00000056602|ENSMUSG00000017707|ENSMUSG00000053113|ENSMUSG00000041479|ENSMUSG00000055116|ENSMUSG00000063632|ENSMUSG00000020593|…	http://amigo.geneontology.org/cgi-bin/amigo/term_details?term=GO:0050794
single-organism cellular process	Gene Ontology	GO:0044763	190	9204	9.47396e-16	3.38157e-13	ENSMUSG00000053199|ENSMUSG00000025509|ENSMUSG00000000901|ENSMUSG00000049892|ENSMUSG00000058624|ENSMUSG00000031770|ENSMUSG00000024190|ENSMUSG00000027398|ENSMUSG00000019577|ENSMUSG00000003484|ENSMUSG00000027843|ENSMUSG00000052837|ENSMUSG00000040907|ENSMUSG00000020387|ENSMUSG00000056602|ENSMUSG00000017707|ENSMUSG00000053113|ENSMUSG00000041479|ENSMUSG00000055116|ENSMUSG00000063632|ENSMUSG00000020593|…	http://amigo.geneontology.org/cgi-bin/amigo/term_details?term=GO:0044763
regulation of apoptotic process	Gene Ontology	GO:0042981	55	1234	2.95678e-15	9.89412e-13	ENSMUSG00000020427|ENSMUSG00000024066|ENSMUSG00000028128|ENSMUSG00000030093|ENSMUSG00000019970|ENSMUSG00000030790|ENSMUSG00000029304|ENSMUSG00000031770|ENSMUSG00000056501|ENSMUSG00000058755|ENSMUSG00000078817|ENSMUSG00000053965|ENSMUSG00000033685|ENSMUSG00000048756|ENSMUSG00000017707|ENSMUSG00000046223|ENSMUSG00000031431|ENSMUSG00000045730|ENSMUSG00000078566|ENSMUSG00000053113|ENSMUSG00000023034|…	http://amigo.geneontology.org/cgi-bin/amigo/term_details?term=GO:0042981
apoptotic process	Gene Ontology	GO:0006915	62	1546	4.10567e-15	1.29304e-12	ENSMUSG00000020427|ENSMUSG00000024066|ENSMUSG00000028128|ENSMUSG00000030093|ENSMUSG00000019970|ENSMUSG00000030790|ENSMUSG00000029304|ENSMUSG00000031770|ENSMUSG00000056501|ENSMUSG00000058755|ENSMUSG00000078817|ENSMUSG00000053965|ENSMUSG00000019851|ENSMUSG00000033685|ENSMUSG00000021886|ENSMUSG00000048756|ENSMUSG00000017707|ENSMUSG00000043099|ENSMUSG00000046223|ENSMUSG00000026628|ENSMUSG00000031431|…	http://amigo.geneontology.org/cgi-bin/amigo/term_details?term=GO:0006915
regulation of programmed cell death	Gene Ontology	GO:0043067	55	1248	4.65486e-15	1.38456e-12	ENSMUSG00000020427|ENSMUSG00000024066|ENSMUSG00000028128|ENSMUSG00000030093|ENSMUSG00000019970|ENSMUSG00000030790|ENSMUSG00000029304|ENSMUSG00000031770|ENSMUSG00000056501|ENSMUSG00000058755|ENSMUSG00000078817|ENSMUSG00000053965|ENSMUSG00000033685|ENSMUSG00000048756|ENSMUSG00000017707|ENSMUSG00000046223|ENSMUSG00000031431|ENSMUSG00000045730|ENSMUSG00000078566|ENSMUSG00000053113|ENSMUSG00000023034|…	http://amigo.geneontology.org/cgi-bin/amigo/term_details?term=GO:0043067
regulation of response to stimulus	Gene Ontology	GO:0048583	87	2796	8.48292e-15	2.3904e-12	ENSMUSG00000031770|ENSMUSG00000019577|ENSMUSG00000027843|ENSMUSG00000017707|ENSMUSG00000053113|ENSMUSG00000063632|ENSMUSG00000027947|ENSMUSG00000010797|ENSMUSG00000020427|ENSMUSG00000032496|ENSMUSG00000030474|ENSMUSG00000029335|ENSMUSG00000027398|ENSMUSG00000009628|ENSMUSG00000035828|ENSMUSG00000028211|ENSMUSG00000056071|ENSMUSG00000017737|ENSMUSG00000078566|ENSMUSG00000026628|ENSMUSG00000019768|…	http://amigo.geneontology.org/cgi-bin/amigo/term_details?term=GO:0048583
programmed cell death	Gene Ontology	GO:0012501	62	1574	9.03177e-15	2.41781e-12	ENSMUSG00000020427|ENSMUSG00000024066|ENSMUSG00000028128|ENSMUSG00000030093|ENSMUSG00000019970|ENSMUSG00000030790|ENSMUSG00000029304|ENSMUSG00000031770|ENSMUSG00000056501|ENSMUSG00000058755|ENSMUSG00000078817|ENSMUSG00000053965|ENSMUSG00000019851|ENSMUSG00000033685|ENSMUSG00000021886|ENSMUSG00000048756|ENSMUSG00000017707|ENSMUSG00000043099|ENSMUSG00000046223|ENSMUSG00000026628|ENSMUSG00000031431|…	http://amigo.geneontology.org/cgi-bin/amigo/term_details?term=GO:0012501
signal transduction	Gene Ontology	GO:0007165	109	4022	9.62619e-15	2.45422e-12	ENSMUSG00000053199|ENSMUSG00000049892|ENSMUSG00000031770|ENSMUSG00000031762|ENSMUSG00000019577|ENSMUSG00000027843|ENSMUSG00000040907|ENSMUSG00000020387|ENSMUSG00000017707|ENSMUSG00000053113|ENSMUSG00000063632|ENSMUSG00000027947|ENSMUSG00000010797|ENSMUSG00000030351|ENSMUSG00000024042|ENSMUSG00000020427|ENSMUSG00000032496|ENSMUSG00000046743|ENSMUSG00000045502|ENSMUSG00000034936|ENSMUSG00000027398|…	http://amigo.geneontology.org/cgi-bin/amigo/term_details?term=GO:0007165
single-multicellular organism process	Gene Ontology	GO:0044707	125	4985	1.06282e-14	2.58651e-12	ENSMUSG00000000901|ENSMUSG00000036144|ENSMUSG00000019577|ENSMUSG00000027843|ENSMUSG00000052837|ENSMUSG00000040907|ENSMUSG00000020387|ENSMUSG00000056602|ENSMUSG00000053113|ENSMUSG00000040055|ENSMUSG00000063632|ENSMUSG00000027947|ENSMUSG00000010797|ENSMUSG00000037962|ENSMUSG00000020423|ENSMUSG00000024042|ENSMUSG00000019851|ENSMUSG00000032496|ENSMUSG00000046743|ENSMUSG00000045502|ENSMUSG00000027398|…	http://amigo.geneontology.org/cgi-bin/amigo/term_details?term=GO:0044707
immune system process	Gene Ontology	GO:0002376	67	1818	1.32236e-14	3.07823e-12	ENSMUSG00000058818|ENSMUSG00000032661|ENSMUSG00000067235|ENSMUSG00000032496|ENSMUSG00000031431|ENSMUSG00000047798|ENSMUSG00000030790|ENSMUSG00000086564|ENSMUSG00000029304|ENSMUSG00000056501|ENSMUSG00000024778|ENSMUSG00000058755|ENSMUSG00000078817|ENSMUSG00000030144|ENSMUSG00000005824|ENSMUSG00000053965|ENSMUSG00000025330|ENSMUSG00000019577|ENSMUSG00000062593|ENSMUSG00000026576|ENSMUSG00000042265|…	http://amigo.geneontology.org/cgi-bin/amigo/term_details?term=GO:0002376
response to external stimulus	Gene Ontology	GO:0009605	62	1617	2.92052e-14	6.51519e-12	ENSMUSG00000045092|ENSMUSG00000032661|ENSMUSG00000078566|ENSMUSG00000078817|ENSMUSG00000030790|ENSMUSG00000029304|ENSMUSG00000060063|ENSMUSG00000030474|ENSMUSG00000030144|ENSMUSG00000005824|ENSMUSG00000053965|ENSMUSG00000019577|ENSMUSG00000026576|ENSMUSG00000030142|ENSMUSG00000027843|ENSMUSG00000052837|ENSMUSG00000026473|ENSMUSG00000017707|ENSMUSG00000057604|ENSMUSG00000021508|ENSMUSG00000027483|…	http://amigo.geneontology.org/cgi-bin/amigo/term_details?term=GO:0009605
negative regulation of biological process	Gene Ontology	GO:0048519	105	3860	3.08804e-14	6.61335e-12	ENSMUSG00000000901|ENSMUSG00000049892|ENSMUSG00000032661|ENSMUSG00000031770|ENSMUSG00000036144|ENSMUSG00000057719|ENSMUSG00000045730|ENSMUSG00000019577|ENSMUSG00000003484|ENSMUSG00000027843|ENSMUSG00000052837|ENSMUSG00000056602|ENSMUSG00000053113|ENSMUSG00000063632|ENSMUSG00000020593|ENSMUSG00000025509|ENSMUSG00000037962|ENSMUSG00000020423|ENSMUSG00000024042|ENSMUSG00000020427|ENSMUSG00000032496|…	http://amigo.geneontology.org/cgi-bin/amigo/term_details?term=GO:0048519
intracellular signal transduction	Gene Ontology	GO:0035556	70	2013	4.6797e-14	9.63658e-12	ENSMUSG00000038332|ENSMUSG00000046223|ENSMUSG00000030093|ENSMUSG00000028128|ENSMUSG00000078817|ENSMUSG00000034936|ENSMUSG00000049892|ENSMUSG00000019970|ENSMUSG00000020032|ENSMUSG00000049001|ENSMUSG00000031770|ENSMUSG00000061718|ENSMUSG00000058755|ENSMUSG00000031762|ENSMUSG00000055116|ENSMUSG00000005824|ENSMUSG00000053965|ENSMUSG00000019851|ENSMUSG00000026576|ENSMUSG00000045094|ENSMUSG00000027843|…	http://amigo.geneontology.org/cgi-bin/amigo/term_details?term=GO:0035556
positive regulation of biological process	Gene Ontology	GO:0048518	114	4443	7.31683e-14	1.4509e-11	ENSMUSG00000058624|ENSMUSG00000031770|ENSMUSG00000024190|ENSMUSG00000003484|ENSMUSG00000027843|ENSMUSG00000052837|ENSMUSG00000020387|ENSMUSG00000017707|ENSMUSG00000053113|ENSMUSG00000063632|ENSMUSG00000020593|ENSMUSG00000025509|ENSMUSG00000027947|ENSMUSG00000010797|ENSMUSG00000020423|ENSMUSG00000020427|ENSMUSG00000032496|ENSMUSG00000029335|ENSMUSG00000045502|ENSMUSG00000027398|ENSMUSG00000056501|…	http://amigo.geneontology.org/cgi-bin/amigo/term_details?term=GO:0048518
multicellular organismal process	Gene Ontology	GO:0032501	130	5496	1.8569e-13	3.55066e-11	ENSMUSG00000000901|ENSMUSG00000036144|ENSMUSG00000019577|ENSMUSG00000003484|ENSMUSG00000027843|ENSMUSG00000052837|ENSMUSG00000040907|ENSMUSG00000020387|ENSMUSG00000056602|ENSMUSG00000053113|ENSMUSG00000040055|ENSMUSG00000063632|ENSMUSG00000027947|ENSMUSG00000010797|ENSMUSG00000037962|ENSMUSG00000020423|ENSMUSG00000024042|ENSMUSG00000019851|ENSMUSG00000032496|ENSMUSG00000046743|ENSMUSG00000045502|…	http://amigo.geneontology.org/cgi-bin/amigo/term_details?term=GO:0032501
negative regulation of cellular process	Gene Ontology	GO:0048523	97	3591	7.3089e-13	1.34937e-10	ENSMUSG00000000901|ENSMUSG00000049892|ENSMUSG00000031770|ENSMUSG00000027483|ENSMUSG00000057719|ENSMUSG00000045730|ENSMUSG00000019577|ENSMUSG00000027843|ENSMUSG00000052837|ENSMUSG00000056602|ENSMUSG00000053113|ENSMUSG00000063632|ENSMUSG00000020593|ENSMUSG00000037962|ENSMUSG00000020423|ENSMUSG00000024042|ENSMUSG00000020427|ENSMUSG00000032496|ENSMUSG00000030474|ENSMUSG00000027398|ENSMUSG00000031765|…	http://amigo.geneontology.org/cgi-bin/amigo/term_details?term=GO:0048523
single-organism developmental process	Gene Ontology	GO:0044767	117	4847	1.86986e-12	3.33707e-10	ENSMUSG00000000901|ENSMUSG00000024190|ENSMUSG00000027843|ENSMUSG00000052837|ENSMUSG00000020387|ENSMUSG00000056602|ENSMUSG00000053113|ENSMUSG00000040055|ENSMUSG00000063632|ENSMUSG00000020593|ENSMUSG00000027947|ENSMUSG00000010797|ENSMUSG00000037962|ENSMUSG00000020423|ENSMUSG00000024042|ENSMUSG00000020427|ENSMUSG00000032496|ENSMUSG00000046743|ENSMUSG00000027398|ENSMUSG00000009628|ENSMUSG00000028211|…	http://amigo.geneontology.org/cgi-bin/amigo/term_details?term=GO:0044767
positive regulation of cellular process	Gene Ontology	GO:0048522	103	4018	2.47282e-12	4.27079e-10	ENSMUSG00000058624|ENSMUSG00000031770|ENSMUSG00000024190|ENSMUSG00000027843|ENSMUSG00000052837|ENSMUSG00000020387|ENSMUSG00000017707|ENSMUSG00000053113|ENSMUSG00000063632|ENSMUSG00000020593|ENSMUSG00000025509|ENSMUSG00000027947|ENSMUSG00000010797|ENSMUSG00000020423|ENSMUSG00000020427|ENSMUSG00000032496|ENSMUSG00000029335|ENSMUSG00000045502|ENSMUSG00000027398|ENSMUSG00000048534|ENSMUSG00000056071|…	http://amigo.geneontology.org/cgi-bin/amigo/term_details?term=GO:0048522
response to organic substance	Gene Ontology	GO:0010033	66	1994	2.59284e-12	4.33815e-10	ENSMUSG00000058818|ENSMUSG00000038332|ENSMUSG00000045613|ENSMUSG00000042834|ENSMUSG00000021765|ENSMUSG00000005320|ENSMUSG00000028211|ENSMUSG00000030790|ENSMUSG00000029304|ENSMUSG00000031770|ENSMUSG00000061718|ENSMUSG00000058755|ENSMUSG00000027398|ENSMUSG00000055116|ENSMUSG00000033685|ENSMUSG00000048756|ENSMUSG00000032204|ENSMUSG00000027843|ENSMUSG00000052837|ENSMUSG00000026473|ENSMUSG00000025804|…	http://amigo.geneontology.org/cgi-bin/amigo/term_details?term=GO:0010033
developmental process	Gene Ontology	GO:0032502	117	4896	3.67389e-12	5.96061e-10	ENSMUSG00000000901|ENSMUSG00000024190|ENSMUSG00000027843|ENSMUSG00000052837|ENSMUSG00000020387|ENSMUSG00000056602|ENSMUSG00000053113|ENSMUSG00000040055|ENSMUSG00000063632|ENSMUSG00000020593|ENSMUSG00000027947|ENSMUSG00000010797|ENSMUSG00000037962|ENSMUSG00000020423|ENSMUSG00000024042|ENSMUSG00000020427|ENSMUSG00000032496|ENSMUSG00000046743|ENSMUSG00000027398|ENSMUSG00000009628|ENSMUSG00000028211|…	http://amigo.geneontology.org/cgi-bin/amigo/term_details?term=GO:0032502
positive regulation of cell death	Gene Ontology	GO:0010942	32	545	4.11996e-12	6.48772e-10	ENSMUSG00000048756|ENSMUSG00000028128|ENSMUSG00000078566|ENSMUSG00000030790|ENSMUSG00000024190|ENSMUSG00000058755|ENSMUSG00000053965|ENSMUSG00000033685|ENSMUSG00000046223|ENSMUSG00000017707|ENSMUSG00000045730|ENSMUSG00000023034|ENSMUSG00000022018|ENSMUSG00000024066|ENSMUSG00000026480|ENSMUSG00000076431|ENSMUSG00000007659|ENSMUSG00000020427|ENSMUSG00000045502|ENSMUSG00000027398|ENSMUSG00000026180|…	http://amigo.geneontology.org/cgi-bin/amigo/term_details?term=GO:0010942
regulation of localization	Gene Ontology	GO:0032879	69	2199	7.90041e-12	1.20854e-09	ENSMUSG00000045092|ENSMUSG00000057123|ENSMUSG00000028128|ENSMUSG00000030093|ENSMUSG00000019970|ENSMUSG00000033855|ENSMUSG00000028003|ENSMUSG00000041794|ENSMUSG00000058755|ENSMUSG00000078817|ENSMUSG00000055116|ENSMUSG00000015568|ENSMUSG00000020848|ENSMUSG00000033685|ENSMUSG00000003484|ENSMUSG00000026576|ENSMUSG00000027843|ENSMUSG00000026473|ENSMUSG00000025804|ENSMUSG00000000628|ENSMUSG00000047250|…	http://amigo.geneontology.org/cgi-bin/amigo/term_details?term=GO:0032879
regulation of biological quality	Gene Ontology	GO:0065008	81	2849	9.97644e-12	1.48372e-09	ENSMUSG00000058818|ENSMUSG00000057123|ENSMUSG00000036295|ENSMUSG00000028893|ENSMUSG00000031431|ENSMUSG00000028128|ENSMUSG00000039109|ENSMUSG00000030790|ENSMUSG00000029304|ENSMUSG00000005824|ENSMUSG00000028003|ENSMUSG00000031770|ENSMUSG00000041794|ENSMUSG00000058755|ENSMUSG00000027398|ENSMUSG00000055116|ENSMUSG00000015568|ENSMUSG00000020848|ENSMUSG00000033684|ENSMUSG00000033685|ENSMUSG00000042265|…	http://amigo.geneontology.org/cgi-bin/amigo/term_details?term=GO:0065008
positive regulation of response to stimulus	Gene Ontology	GO:0048584	55	1530	1.23557e-11	1.75918e-09	ENSMUSG00000024066|ENSMUSG00000046223|ENSMUSG00000030093|ENSMUSG00000028128|ENSMUSG00000031770|ENSMUSG00000060063|ENSMUSG00000058755|ENSMUSG00000078817|ENSMUSG00000055116|ENSMUSG00000005824|ENSMUSG00000053965|ENSMUSG00000048756|ENSMUSG00000027843|ENSMUSG00000043099|ENSMUSG00000025804|ENSMUSG00000000628|ENSMUSG00000017707|ENSMUSG00000045730|ENSMUSG00000026628|ENSMUSG00000021025|ENSMUSG00000063632|…	http://amigo.geneontology.org/cgi-bin/amigo/term_details?term=GO:0048584
defense response	Gene Ontology	GO:0006952	46	1124	1.24858e-11	1.75918e-09	ENSMUSG00000032661|ENSMUSG00000032484|ENSMUSG00000030790|ENSMUSG00000060063|ENSMUSG00000078817|ENSMUSG00000053965|ENSMUSG00000025330|ENSMUSG00000019577|ENSMUSG00000008845|ENSMUSG00000026576|ENSMUSG00000042265|ENSMUSG00000027843|ENSMUSG00000017707|ENSMUSG00000057604|ENSMUSG00000047250|ENSMUSG00000045730|ENSMUSG00000053113|ENSMUSG00000040451|ENSMUSG00000021025|ENSMUSG00000020893|ENSMUSG00000030144|…	http://amigo.geneontology.org/cgi-bin/amigo/term_details?term=GO:0006952
cellular process	Gene Ontology	GO:0009987	211	11700	1.4622e-11	2.00734e-09	ENSMUSG00000053199|ENSMUSG00000025509|ENSMUSG00000000901|ENSMUSG00000049892|ENSMUSG00000032661|ENSMUSG00000058624|ENSMUSG00000031770|ENSMUSG00000036144|ENSMUSG00000057719|ENSMUSG00000045730|ENSMUSG00000019577|ENSMUSG00000003484|ENSMUSG00000027843|ENSMUSG00000052837|ENSMUSG00000040907|ENSMUSG00000020387|ENSMUSG00000056602|ENSMUSG00000017707|ENSMUSG00000053113|ENSMUSG00000041479|ENSMUSG00000055116|…	http://amigo.geneontology.org/cgi-bin/amigo/term_details?term=GO:0009987
regulation of response to stress	Gene Ontology	GO:0080134	43	1006	1.67618e-11	2.24357e-09	ENSMUSG00000038332|ENSMUSG00000030093|ENSMUSG00000031770|ENSMUSG00000060063|ENSMUSG00000078817|ENSMUSG00000055116|ENSMUSG00000053965|ENSMUSG00000019577|ENSMUSG00000026576|ENSMUSG00000042265|ENSMUSG00000027843|ENSMUSG00000043099|ENSMUSG00000020032|ENSMUSG00000017707|ENSMUSG00000045730|ENSMUSG00000053113|ENSMUSG00000021025|ENSMUSG00000020893|ENSMUSG00000024066|ENSMUSG00000038264|ENSMUSG00000024063|…	http://amigo.geneontology.org/cgi-bin/amigo/term_details?term=GO:0080134
regulation of multicellular organismal process	Gene Ontology	GO:0051239	72	2398	1.81587e-11	2.37126e-09	ENSMUSG00000024066|ENSMUSG00000057123|ENSMUSG00000036295|ENSMUSG00000031431|ENSMUSG00000028128|ENSMUSG00000032484|ENSMUSG00000030790|ENSMUSG00000086564|ENSMUSG00000029304|ENSMUSG00000024778|ENSMUSG00000078817|ENSMUSG00000055116|ENSMUSG00000015568|ENSMUSG00000053965|ENSMUSG00000019577|ENSMUSG00000030093|ENSMUSG00000026576|ENSMUSG00000028194|ENSMUSG00000027843|ENSMUSG00000045613|ENSMUSG00000020387|…	http://amigo.geneontology.org/cgi-bin/amigo/term_details?term=GO:0051239
positive regulation of programmed cell death	Gene Ontology	GO:0043068	30	511	2.01398e-11	2.56735e-09	ENSMUSG00000048756|ENSMUSG00000028128|ENSMUSG00000078566|ENSMUSG00000030790|ENSMUSG00000024190|ENSMUSG00000058755|ENSMUSG00000053965|ENSMUSG00000046223|ENSMUSG00000017707|ENSMUSG00000045730|ENSMUSG00000023034|ENSMUSG00000022018|ENSMUSG00000024066|ENSMUSG00000026480|ENSMUSG00000076431|ENSMUSG00000007659|ENSMUSG00000020427|ENSMUSG00000045502|ENSMUSG00000027398|ENSMUSG00000026180|ENSMUSG00000056054|…	http://amigo.geneontology.org/cgi-bin/amigo/term_details?term=GO:0043068
animal organ development	Gene Ontology	GO:0048513	77	2701	3.4096e-11	4.24535e-09	ENSMUSG00000058818|ENSMUSG00000057123|ENSMUSG00000046223|ENSMUSG00000035456|ENSMUSG00000030093|ENSMUSG00000052837|ENSMUSG00000030790|ENSMUSG00000086564|ENSMUSG00000029304|ENSMUSG00000033508|ENSMUSG00000031431|ENSMUSG00000038402|ENSMUSG00000055116|ENSMUSG00000024066|ENSMUSG00000028967|ENSMUSG00000047798|ENSMUSG00000048756|ENSMUSG00000030087|ENSMUSG00000027843|ENSMUSG00000054675|ENSMUSG00000025804|…	http://amigo.geneontology.org/cgi-bin/amigo/term_details?term=GO:0048513
multicellular organism development	Gene Ontology	GO:0007275	102	4147	3.85466e-11	4.67546e-09	ENSMUSG00000000901|ENSMUSG00000024190|ENSMUSG00000027843|ENSMUSG00000052837|ENSMUSG00000020387|ENSMUSG00000056602|ENSMUSG00000053113|ENSMUSG00000063632|ENSMUSG00000027947|ENSMUSG00000010797|ENSMUSG00000037962|ENSMUSG00000020423|ENSMUSG00000024042|ENSMUSG00000032496|ENSMUSG00000046743|ENSMUSG00000027398|ENSMUSG00000009628|ENSMUSG00000056071|ENSMUSG00000017737|ENSMUSG00000026628|ENSMUSG00000019768|…	http://amigo.geneontology.org/cgi-bin/amigo/term_details?term=GO:0007275
regulation of intracellular signal transduction	Gene Ontology	GO:1902531	49	1299	3.92969e-11	4.67546e-09	ENSMUSG00000038332|ENSMUSG00000028128|ENSMUSG00000030093|ENSMUSG00000078817|ENSMUSG00000031770|ENSMUSG00000019122|ENSMUSG00000058755|ENSMUSG00000027398|ENSMUSG00000055116|ENSMUSG00000005824|ENSMUSG00000053965|ENSMUSG00000027843|ENSMUSG00000043099|ENSMUSG00000046223|ENSMUSG00000017707|ENSMUSG00000045730|ENSMUSG00000053113|ENSMUSG00000021025|ENSMUSG00000063632|ENSMUSG00000020053|ENSMUSG00000038264|…	http://amigo.geneontology.org/cgi-bin/amigo/term_details?term=GO:1902531
regulation of cell communication	Gene Ontology	GO:0010646	71	2398	4.85381e-11	5.64941e-09	ENSMUSG00000038332|ENSMUSG00000057123|ENSMUSG00000046223|ENSMUSG00000053965|ENSMUSG00000030093|ENSMUSG00000028128|ENSMUSG00000078817|ENSMUSG00000030790|ENSMUSG00000031770|ENSMUSG00000041794|ENSMUSG00000058755|ENSMUSG00000027398|ENSMUSG00000055116|ENSMUSG00000005824|ENSMUSG00000020848|ENSMUSG00000033685|ENSMUSG00000048756|ENSMUSG00000027843|ENSMUSG00000026473|ENSMUSG00000043099|ENSMUSG00000025804|…	http://amigo.geneontology.org/cgi-bin/amigo/term_details?term=GO:0010646
leukocyte chemotaxis	Gene Ontology	GO:0030595	17	149	5.1872e-11	5.90899e-09	ENSMUSG00000045092|ENSMUSG00000029304|ENSMUSG00000056054|ENSMUSG00000005824|ENSMUSG00000042265|ENSMUSG00000048534|ENSMUSG00000025804|ENSMUSG00000056071|ENSMUSG00000026581|ENSMUSG00000023913|ENSMUSG00000049130|ENSMUSG00000021508|ENSMUSG00000019122|ENSMUSG00000025473|ENSMUSG00000027398|ENSMUSG00000028859|ENSMUSG00000026180	http://amigo.geneontology.org/cgi-bin/amigo/term_details?term=GO:0030595
regulation of signaling	Gene Ontology	GO:0023051	71	2417	6.86462e-11	7.65691e-09	ENSMUSG00000038332|ENSMUSG00000057123|ENSMUSG00000046223|ENSMUSG00000053965|ENSMUSG00000030093|ENSMUSG00000028128|ENSMUSG00000078817|ENSMUSG00000030790|ENSMUSG00000031770|ENSMUSG00000041794|ENSMUSG00000058755|ENSMUSG00000027398|ENSMUSG00000055116|ENSMUSG00000005824|ENSMUSG00000020848|ENSMUSG00000033685|ENSMUSG00000048756|ENSMUSG00000027843|ENSMUSG00000026473|ENSMUSG00000043099|ENSMUSG00000025804|…	http://amigo.geneontology.org/cgi-bin/amigo/term_details?term=GO:0023051
positive regulation of apoptotic process	Gene Ontology	GO:0043065	29	506	7.61068e-11	8.19802e-09	ENSMUSG00000048756|ENSMUSG00000028128|ENSMUSG00000030790|ENSMUSG00000024190|ENSMUSG00000058755|ENSMUSG00000053965|ENSMUSG00000046223|ENSMUSG00000017707|ENSMUSG00000045730|ENSMUSG00000023034|ENSMUSG00000022018|ENSMUSG00000024066|ENSMUSG00000026480|ENSMUSG00000076431|ENSMUSG00000007659|ENSMUSG00000020427|ENSMUSG00000045502|ENSMUSG00000027398|ENSMUSG00000026180|ENSMUSG00000056054|ENSMUSG00000028211|…	http://amigo.geneontology.org/cgi-bin/amigo/term_details?term=GO:0043065
cell surface receptor signaling pathway	Gene Ontology	GO:0007166	61	1904	7.65597e-11	8.19802e-09	ENSMUSG00000058818|ENSMUSG00000039167|ENSMUSG00000046223|ENSMUSG00000030093|ENSMUSG00000028128|ENSMUSG00000030351|ENSMUSG00000086564|ENSMUSG00000019122|ENSMUSG00000058755|ENSMUSG00000078817|ENSMUSG00000055116|ENSMUSG00000046182|ENSMUSG00000019577|ENSMUSG00000048756|ENSMUSG00000027843|ENSMUSG00000040907|ENSMUSG00000043099|ENSMUSG00000025804|ENSMUSG00000020387|ENSMUSG00000045730|ENSMUSG00000053113|…	http://amigo.geneontology.org/cgi-bin/amigo/term_details?term=GO:0007166
regulation of cellular protein metabolic process	Gene Ontology	GO:0032268	61	1911	8.83658e-11	9.27668e-09	ENSMUSG00000024066|ENSMUSG00000036295|ENSMUSG00000030093|ENSMUSG00000028128|ENSMUSG00000033777|ENSMUSG00000032484|ENSMUSG00000020032|ENSMUSG00000031770|ENSMUSG00000061718|ENSMUSG00000058755|ENSMUSG00000078817|ENSMUSG00000045730|ENSMUSG00000053965|ENSMUSG00000019851|ENSMUSG00000048756|ENSMUSG00000027843|ENSMUSG00000025804|ENSMUSG00000056602|ENSMUSG00000024190|ENSMUSG00000079012|ENSMUSG00000047146|…	http://amigo.geneontology.org/cgi-bin/amigo/term_details?term=GO:0032268
anatomical structure development	Gene Ontology	GO:0048856	108	4582	9.67968e-11	9.96635e-09	ENSMUSG00000000901|ENSMUSG00000024190|ENSMUSG00000027843|ENSMUSG00000052837|ENSMUSG00000020387|ENSMUSG00000056602|ENSMUSG00000053113|ENSMUSG00000063632|ENSMUSG00000027947|ENSMUSG00000010797|ENSMUSG00000037962|ENSMUSG00000020423|ENSMUSG00000024042|ENSMUSG00000020427|ENSMUSG00000032496|ENSMUSG00000046743|ENSMUSG00000027398|ENSMUSG00000009628|ENSMUSG00000056071|ENSMUSG00000017737|ENSMUSG00000078566|…	http://amigo.geneontology.org/cgi-bin/amigo/term_details?term=GO:0048856
regulation of cell proliferation	Gene Ontology	GO:0042127	49	1337	1.02876e-10	1.03924e-08	ENSMUSG00000024066|ENSMUSG00000028128|ENSMUSG00000030093|ENSMUSG00000019970|ENSMUSG00000030790|ENSMUSG00000056501|ENSMUSG00000058755|ENSMUSG00000053965|ENSMUSG00000048756|ENSMUSG00000027843|ENSMUSG00000052837|ENSMUSG00000026473|ENSMUSG00000047250|ENSMUSG00000045730|ENSMUSG00000047146|ENSMUSG00000023034|ENSMUSG00000021025|ENSMUSG00000040055|ENSMUSG00000063632|ENSMUSG00000022018|ENSMUSG00000020053|…	http://amigo.geneontology.org/cgi-bin/amigo/term_details?term=GO:0042127
protein binding	Gene Ontology	GO:0005515	144	6985	1.74246e-10	1.72762e-08	ENSMUSG00000049892|ENSMUSG00000030350|ENSMUSG00000058624|ENSMUSG00000031770|ENSMUSG00000057719|ENSMUSG00000047330|ENSMUSG00000027843|ENSMUSG00000052837|ENSMUSG00000040907|ENSMUSG00000020387|ENSMUSG00000053113|ENSMUSG00000041479|ENSMUSG00000020893|ENSMUSG00000020593|ENSMUSG00000025509|ENSMUSG00000027947|ENSMUSG00000010797|ENSMUSG00000028337|ENSMUSG00000020423|ENSMUSG00000024042|ENSMUSG00000066319|…	http://amigo.geneontology.org/cgi-bin/amigo/term_details?term=GO:0005515
leukocyte migration	Gene Ontology	GO:0050900	20	240	1.87028e-10	1.82063e-08	ENSMUSG00000045092|ENSMUSG00000029304|ENSMUSG00000056054|ENSMUSG00000005824|ENSMUSG00000027843|ENSMUSG00000048534|ENSMUSG00000025804|ENSMUSG00000056071|ENSMUSG00000078817|ENSMUSG00000017737|ENSMUSG00000026581|ENSMUSG00000023913|ENSMUSG00000049130|ENSMUSG00000021508|ENSMUSG00000019122|ENSMUSG00000025473|ENSMUSG00000027398|ENSMUSG00000028859|ENSMUSG00000026180|ENSMUSG00000042265	http://amigo.geneontology.org/cgi-bin/amigo/term_details?term=GO:0050900
positive regulation of cell communication	Gene Ontology	GO:0010647	47	1275	2.17636e-10	2.08076e-08	ENSMUSG00000024066|ENSMUSG00000057123|ENSMUSG00000028128|ENSMUSG00000053965|ENSMUSG00000030093|ENSMUSG00000041794|ENSMUSG00000058755|ENSMUSG00000078817|ENSMUSG00000055116|ENSMUSG00000005824|ENSMUSG00000020848|ENSMUSG00000027843|ENSMUSG00000026473|ENSMUSG00000043099|ENSMUSG00000046223|ENSMUSG00000026628|ENSMUSG00000017707|ENSMUSG00000045730|ENSMUSG00000005320|ENSMUSG00000063632|ENSMUSG00000039304|…	http://amigo.geneontology.org/cgi-bin/amigo/term_details?term=GO:0010647
positive regulation of metabolic process	Gene Ontology	GO:0009893	72	2538	2.24267e-10	2.10654e-08	ENSMUSG00000024066|ENSMUSG00000036295|ENSMUSG00000030093|ENSMUSG00000028128|ENSMUSG00000028211|ENSMUSG00000030790|ENSMUSG00000031770|ENSMUSG00000019122|ENSMUSG00000058755|ENSMUSG00000038402|ENSMUSG00000055116|ENSMUSG00000027513|ENSMUSG00000045730|ENSMUSG00000053965|ENSMUSG00000019851|ENSMUSG00000024063|ENSMUSG00000021886|ENSMUSG00000048756|ENSMUSG00000030087|ENSMUSG00000027843|ENSMUSG00000052837|…	http://amigo.geneontology.org/cgi-bin/amigo/term_details?term=GO:0009893
negative regulation of cell death	Gene Ontology	GO:0060548	37	844	2.5471e-10	2.35123e-08	ENSMUSG00000030093|ENSMUSG00000019970|ENSMUSG00000029304|ENSMUSG00000031770|ENSMUSG00000056501|ENSMUSG00000019577|ENSMUSG00000046223|ENSMUSG00000031431|ENSMUSG00000078566|ENSMUSG00000053113|ENSMUSG00000023034|ENSMUSG00000031765|ENSMUSG00000040451|ENSMUSG00000033685|ENSMUSG00000049001|ENSMUSG00000020053|ENSMUSG00000024190|ENSMUSG00000076431|ENSMUSG00000020423|ENSMUSG00000027656|ENSMUSG00000002289|…	http://amigo.geneontology.org/cgi-bin/amigo/term_details?term=GO:0060548
regulation of protein metabolic process	Gene Ontology	GO:0051246	63	2075	2.9657e-10	2.69124e-08	ENSMUSG00000024066|ENSMUSG00000036295|ENSMUSG00000030093|ENSMUSG00000028128|ENSMUSG00000033777|ENSMUSG00000032484|ENSMUSG00000020032|ENSMUSG00000031770|ENSMUSG00000061718|ENSMUSG00000058755|ENSMUSG00000078817|ENSMUSG00000055116|ENSMUSG00000045730|ENSMUSG00000053965|ENSMUSG00000019851|ENSMUSG00000048756|ENSMUSG00000027843|ENSMUSG00000025804|ENSMUSG00000056602|ENSMUSG00000024190|ENSMUSG00000079012|…	http://amigo.geneontology.org/cgi-bin/amigo/term_details?term=GO:0051246
regulation of response to external stimulus	Gene Ontology	GO:0032101	32	653	3.35048e-10	2.98974e-08	ENSMUSG00000019122|ENSMUSG00000027398|ENSMUSG00000005824|ENSMUSG00000053965|ENSMUSG00000019577|ENSMUSG00000026576|ENSMUSG00000042265|ENSMUSG00000027843|ENSMUSG00000057604|ENSMUSG00000045730|ENSMUSG00000053113|ENSMUSG00000020893|ENSMUSG00000045092|ENSMUSG00000038264|ENSMUSG00000024063|ENSMUSG00000025804|ENSMUSG00000026581|ENSMUSG00000030474|ENSMUSG00000032496|ENSMUSG00000078817|ENSMUSG00000026180|…	http://amigo.geneontology.org/cgi-bin/amigo/term_details?term=GO:0032101
cell proliferation	Gene Ontology	GO:0008283	54	1629	3.55033e-10	3.11614e-08	ENSMUSG00000024066|ENSMUSG00000028128|ENSMUSG00000030093|ENSMUSG00000019970|ENSMUSG00000030790|ENSMUSG00000056501|ENSMUSG00000058755|ENSMUSG00000053965|ENSMUSG00000048756|ENSMUSG00000027843|ENSMUSG00000052837|ENSMUSG00000026473|ENSMUSG00000047250|ENSMUSG00000045730|ENSMUSG00000047146|ENSMUSG00000023034|ENSMUSG00000021025|ENSMUSG00000040055|ENSMUSG00000014813|ENSMUSG00000063632|ENSMUSG00000022018|…	http://amigo.geneontology.org/cgi-bin/amigo/term_details?term=GO:0008283
system development	Gene Ontology	GO:0048731	91	3652	3.75822e-10	3.24541e-08	ENSMUSG00000027843|ENSMUSG00000052837|ENSMUSG00000020387|ENSMUSG00000056602|ENSMUSG00000053113|ENSMUSG00000063632|ENSMUSG00000027947|ENSMUSG00000010797|ENSMUSG00000037962|ENSMUSG00000020423|ENSMUSG00000024042|ENSMUSG00000032496|ENSMUSG00000046743|ENSMUSG00000027398|ENSMUSG00000009628|ENSMUSG00000056071|ENSMUSG00000017737|ENSMUSG00000026628|ENSMUSG00000019768|ENSMUSG00000054675|ENSMUSG00000019851|…	http://amigo.geneontology.org/cgi-bin/amigo/term_details?term=GO:0048731
cell chemotaxis	Gene Ontology	GO:0060326	18	198	4.24942e-10	3.61133e-08	ENSMUSG00000045092|ENSMUSG00000029304|ENSMUSG00000056054|ENSMUSG00000005824|ENSMUSG00000042265|ENSMUSG00000048534|ENSMUSG00000025804|ENSMUSG00000056071|ENSMUSG00000026581|ENSMUSG00000023913|ENSMUSG00000049130|ENSMUSG00000021508|ENSMUSG00000023034|ENSMUSG00000019122|ENSMUSG00000025473|ENSMUSG00000027398|ENSMUSG00000028859|ENSMUSG00000026180	http://amigo.geneontology.org/cgi-bin/amigo/term_details?term=GO:0060326
regulation of developmental process	Gene Ontology	GO:0050793	63	2101	4.82721e-10	4.03826e-08	ENSMUSG00000024066|ENSMUSG00000036295|ENSMUSG00000030093|ENSMUSG00000022018|ENSMUSG00000028128|ENSMUSG00000000901|ENSMUSG00000032484|ENSMUSG00000030790|ENSMUSG00000086564|ENSMUSG00000019122|ENSMUSG00000055116|ENSMUSG00000015568|ENSMUSG00000053965|ENSMUSG00000005824|ENSMUSG00000048756|ENSMUSG00000052837|ENSMUSG00000020032|ENSMUSG00000020387|ENSMUSG00000031431|ENSMUSG00000045730|ENSMUSG00000078566|…	http://amigo.geneontology.org/cgi-bin/amigo/term_details?term=GO:0050793
plasma membrane	Gene Ontology	GO:0005886	92	3747	6.15499e-10	5.06981e-08	ENSMUSG00000049892|ENSMUSG00000032661|ENSMUSG00000029321|ENSMUSG00000008845|ENSMUSG00000027843|ENSMUSG00000040907|ENSMUSG00000017707|ENSMUSG00000041479|ENSMUSG00000025509|ENSMUSG00000027947|ENSMUSG00000010797|ENSMUSG00000030351|ENSMUSG00000019851|ENSMUSG00000030350|ENSMUSG00000030474|ENSMUSG00000046743|ENSMUSG00000045502|ENSMUSG00000034936|ENSMUSG00000062593|ENSMUSG00000027656|ENSMUSG00000027015|…	http://amigo.geneontology.org/cgi-bin/amigo/term_details?term=GO:0005886
regulation of signal transduction	Gene Ontology	GO:0009966	63	2119	6.72527e-10	5.45562e-08	ENSMUSG00000038332|ENSMUSG00000028128|ENSMUSG00000030093|ENSMUSG00000078817|ENSMUSG00000030790|ENSMUSG00000031770|ENSMUSG00000019122|ENSMUSG00000058755|ENSMUSG00000027398|ENSMUSG00000055116|ENSMUSG00000005824|ENSMUSG00000053965|ENSMUSG00000048756|ENSMUSG00000027843|ENSMUSG00000043099|ENSMUSG00000046223|ENSMUSG00000017707|ENSMUSG00000045730|ENSMUSG00000053113|ENSMUSG00000040451|ENSMUSG00000021025|…	http://amigo.geneontology.org/cgi-bin/amigo/term_details?term=GO:0009966
positive regulation of signaling	Gene Ontology	GO:0023056	46	1282	8.01629e-10	6.40585e-08	ENSMUSG00000024066|ENSMUSG00000028128|ENSMUSG00000053965|ENSMUSG00000030093|ENSMUSG00000041794|ENSMUSG00000058755|ENSMUSG00000078817|ENSMUSG00000055116|ENSMUSG00000005824|ENSMUSG00000020848|ENSMUSG00000027843|ENSMUSG00000026473|ENSMUSG00000043099|ENSMUSG00000046223|ENSMUSG00000026628|ENSMUSG00000017707|ENSMUSG00000045730|ENSMUSG00000005320|ENSMUSG00000063632|ENSMUSG00000039304|ENSMUSG00000020053|…	http://amigo.geneontology.org/cgi-bin/amigo/term_details?term=GO:0023056
intrinsic component of membrane	Gene Ontology	GO:0031224	101	4317	8.40387e-10	6.61681e-08	ENSMUSG00000030351|ENSMUSG00000029321|ENSMUSG00000031770|ENSMUSG00000003484|ENSMUSG00000040907|ENSMUSG00000017707|ENSMUSG00000041479|ENSMUSG00000027068|ENSMUSG00000027947|ENSMUSG00000066319|ENSMUSG00000030474|ENSMUSG00000046743|ENSMUSG00000045502|ENSMUSG00000062593|ENSMUSG00000027015|ENSMUSG00000078566|ENSMUSG00000046182|ENSMUSG00000054675|ENSMUSG00000019851|ENSMUSG00000086564|ENSMUSG00000028003|…	http://amigo.geneontology.org/cgi-bin/amigo/term_details?term=GO:0031224
cell periphery	Gene Ontology	GO:0071944	93	3841	9.76031e-10	7.57343e-08	ENSMUSG00000049892|ENSMUSG00000032661|ENSMUSG00000029321|ENSMUSG00000008845|ENSMUSG00000027843|ENSMUSG00000040907|ENSMUSG00000056602|ENSMUSG00000017707|ENSMUSG00000041479|ENSMUSG00000025509|ENSMUSG00000027947|ENSMUSG00000010797|ENSMUSG00000030351|ENSMUSG00000019851|ENSMUSG00000030350|ENSMUSG00000030474|ENSMUSG00000046743|ENSMUSG00000045502|ENSMUSG00000034936|ENSMUSG00000062593|ENSMUSG00000027656|…	http://amigo.geneontology.org/cgi-bin/amigo/term_details?term=GO:0071944
positive regulation of macromolecule metabolic process	Gene Ontology	GO:0010604	67	2355	1.00867e-09	7.71488e-08	ENSMUSG00000024066|ENSMUSG00000036295|ENSMUSG00000030093|ENSMUSG00000028128|ENSMUSG00000028211|ENSMUSG00000031770|ENSMUSG00000019122|ENSMUSG00000058755|ENSMUSG00000038402|ENSMUSG00000055116|ENSMUSG00000027513|ENSMUSG00000053965|ENSMUSG00000019851|ENSMUSG00000024063|ENSMUSG00000048756|ENSMUSG00000030087|ENSMUSG00000027843|ENSMUSG00000052837|ENSMUSG00000025804|ENSMUSG00000036144|ENSMUSG00000045730|…	http://amigo.geneontology.org/cgi-bin/amigo/term_details?term=GO:0010604
neutrophil migration	Gene Ontology	GO:1990266	12	75	1.18823e-09	8.96024e-08	ENSMUSG00000056054|ENSMUSG00000042265|ENSMUSG00000048534|ENSMUSG00000056071|ENSMUSG00000026581|ENSMUSG00000029304|ENSMUSG00000049130|ENSMUSG00000019122|ENSMUSG00000025473|ENSMUSG00000027398|ENSMUSG00000028859|ENSMUSG00000026180	http://amigo.geneontology.org/cgi-bin/amigo/term_details?term=GO:1990266
tissue development	Gene Ontology	GO:0009888	51	1541	1.25881e-09	9.36062e-08	ENSMUSG00000024066|ENSMUSG00000057123|ENSMUSG00000030093|ENSMUSG00000030790|ENSMUSG00000029304|ENSMUSG00000031431|ENSMUSG00000038402|ENSMUSG00000055116|ENSMUSG00000037016|ENSMUSG00000052837|ENSMUSG00000046223|ENSMUSG00000047250|ENSMUSG00000045730|ENSMUSG00000053113|ENSMUSG00000023034|ENSMUSG00000037447|ENSMUSG00000005320|ENSMUSG00000042622|ENSMUSG00000014813|ENSMUSG00000063632|ENSMUSG00000022018|…	http://amigo.geneontology.org/cgi-bin/amigo/term_details?term=GO:0009888
extracellular space	Gene Ontology	GO:0005615	42	1119	1.33829e-09	9.81531e-08	ENSMUSG00000020427|ENSMUSG00000024066|ENSMUSG00000032661|ENSMUSG00000067235|ENSMUSG00000020432|ENSMUSG00000030093|ENSMUSG00000039109|ENSMUSG00000032484|ENSMUSG00000030790|ENSMUSG00000029304|ENSMUSG00000005800|ENSMUSG00000058755|ENSMUSG00000015568|ENSMUSG00000033684|ENSMUSG00000005824|ENSMUSG00000027483|ENSMUSG00000079012|ENSMUSG00000014813|ENSMUSG00000020053|ENSMUSG00000027947|ENSMUSG00000010797|…	http://amigo.geneontology.org/cgi-bin/amigo/term_details?term=GO:0005615
response to oxygen-containing compound	Gene Ontology	GO:1901700	40	1030	1.35772e-09	9.82328e-08	ENSMUSG00000038332|ENSMUSG00000078566|ENSMUSG00000030790|ENSMUSG00000029304|ENSMUSG00000056501|ENSMUSG00000019577|ENSMUSG00000048756|ENSMUSG00000027843|ENSMUSG00000052837|ENSMUSG00000026473|ENSMUSG00000045613|ENSMUSG00000079012|ENSMUSG00000027513|ENSMUSG00000053113|ENSMUSG00000023034|ENSMUSG00000021025|ENSMUSG00000033685|ENSMUSG00000020893|ENSMUSG00000020593|ENSMUSG00000020053|ENSMUSG00000026480|…	http://amigo.geneontology.org/cgi-bin/amigo/term_details?term=GO:1901700
cell differentiation	Gene Ontology	GO:0030154	83	3277	1.44083e-09	1.02856e-07	ENSMUSG00000058818|ENSMUSG00000046223|ENSMUSG00000035456|ENSMUSG00000030093|ENSMUSG00000021765|ENSMUSG00000019970|ENSMUSG00000000901|ENSMUSG00000030790|ENSMUSG00000056602|ENSMUSG00000029304|ENSMUSG00000029576|ENSMUSG00000049001|ENSMUSG00000019122|ENSMUSG00000055116|ENSMUSG00000015568|ENSMUSG00000053965|ENSMUSG00000028967|ENSMUSG00000047798|ENSMUSG00000048756|ENSMUSG00000030087|ENSMUSG00000027843|…	http://amigo.geneontology.org/cgi-bin/amigo/term_details?term=GO:0030154
cellular response to organic substance	Gene Ontology	GO:0071310	50	1502	1.55575e-09	1.08963e-07	ENSMUSG00000058818|ENSMUSG00000038332|ENSMUSG00000042834|ENSMUSG00000005320|ENSMUSG00000028211|ENSMUSG00000024042|ENSMUSG00000031770|ENSMUSG00000019122|ENSMUSG00000058755|ENSMUSG00000027398|ENSMUSG00000055116|ENSMUSG00000033685|ENSMUSG00000048756|ENSMUSG00000027843|ENSMUSG00000052837|ENSMUSG00000025804|ENSMUSG00000053113|ENSMUSG00000023034|ENSMUSG00000021025|ENSMUSG00000071713|ENSMUSG00000019577|…	http://amigo.geneontology.org/cgi-bin/amigo/term_details?term=GO:0071310
positive regulation of cellular metabolic process	Gene Ontology	GO:0031325	67	2381	1.56708e-09	1.08963e-07	ENSMUSG00000024066|ENSMUSG00000036295|ENSMUSG00000030093|ENSMUSG00000028128|ENSMUSG00000030790|ENSMUSG00000031770|ENSMUSG00000019122|ENSMUSG00000058755|ENSMUSG00000038402|ENSMUSG00000055116|ENSMUSG00000027513|ENSMUSG00000045730|ENSMUSG00000053965|ENSMUSG00000019851|ENSMUSG00000024063|ENSMUSG00000021886|ENSMUSG00000048756|ENSMUSG00000030087|ENSMUSG00000027843|ENSMUSG00000052837|ENSMUSG00000027398|…	http://amigo.geneontology.org/cgi-bin/amigo/term_details?term=GO:0031325
integral component of membrane	Gene Ontology	GO:0016021	98	4188	1.70298e-09	1.16878e-07	ENSMUSG00000030351|ENSMUSG00000029321|ENSMUSG00000031770|ENSMUSG00000003484|ENSMUSG00000040907|ENSMUSG00000017707|ENSMUSG00000041479|ENSMUSG00000027068|ENSMUSG00000027947|ENSMUSG00000066319|ENSMUSG00000030474|ENSMUSG00000046743|ENSMUSG00000045502|ENSMUSG00000062593|ENSMUSG00000027015|ENSMUSG00000078566|ENSMUSG00000046182|ENSMUSG00000054675|ENSMUSG00000019851|ENSMUSG00000086564|ENSMUSG00000028003|…	http://amigo.geneontology.org/cgi-bin/amigo/term_details?term=GO:0016021
positive regulation of signal transduction	Gene Ontology	GO:0009967	42	1129	1.72457e-09	1.16878e-07	ENSMUSG00000024066|ENSMUSG00000028128|ENSMUSG00000030093|ENSMUSG00000019122|ENSMUSG00000058755|ENSMUSG00000078817|ENSMUSG00000055116|ENSMUSG00000005824|ENSMUSG00000053965|ENSMUSG00000027843|ENSMUSG00000043099|ENSMUSG00000046223|ENSMUSG00000026628|ENSMUSG00000017707|ENSMUSG00000045730|ENSMUSG00000005320|ENSMUSG00000063632|ENSMUSG00000039304|ENSMUSG00000020053|ENSMUSG00000038264|ENSMUSG00000027947|…	http://amigo.geneontology.org/cgi-bin/amigo/term_details?term=GO:0009967
single-organism metabolic process	Gene Ontology	GO:0044710	80	3135	2.28547e-09	1.52955e-07	ENSMUSG00000020427|ENSMUSG00000038332|ENSMUSG00000025789|ENSMUSG00000030093|ENSMUSG00000025509|ENSMUSG00000000901|ENSMUSG00000064120|ENSMUSG00000019122|ENSMUSG00000030790|ENSMUSG00000058624|ENSMUSG00000029802|ENSMUSG00000028003|ENSMUSG00000031770|ENSMUSG00000060063|ENSMUSG00000058755|ENSMUSG00000027398|ENSMUSG00000027513|ENSMUSG00000015568|ENSMUSG00000053965|ENSMUSG00000025330|ENSMUSG00000033684|…	http://amigo.geneontology.org/cgi-bin/amigo/term_details?term=GO:0044710
regulation of immune system process	Gene Ontology	GO:0002682	39	1011	2.66609e-09	1.76225e-07	ENSMUSG00000030144|ENSMUSG00000032496|ENSMUSG00000086564|ENSMUSG00000056501|ENSMUSG00000005824|ENSMUSG00000053965|ENSMUSG00000019577|ENSMUSG00000026576|ENSMUSG00000042265|ENSMUSG00000027843|ENSMUSG00000057604|ENSMUSG00000031431|ENSMUSG00000021025|ENSMUSG00000063632|ENSMUSG00000022018|ENSMUSG00000020053|ENSMUSG00000038264|ENSMUSG00000030142|ENSMUSG00000025804|ENSMUSG00000033777|ENSMUSG00000021250|…	http://amigo.geneontology.org/cgi-bin/amigo/term_details?term=GO:0002682
localization	Gene Ontology	GO:0051179	107	4794	2.89538e-09	1.89047e-07	ENSMUSG00000029321|ENSMUSG00000031770|ENSMUSG00000036144|ENSMUSG00000003484|ENSMUSG00000027843|ENSMUSG00000040907|ENSMUSG00000001768|ENSMUSG00000017707|ENSMUSG00000041479|ENSMUSG00000063632|ENSMUSG00000025509|ENSMUSG00000024042|ENSMUSG00000066319|ENSMUSG00000020427|ENSMUSG00000032496|ENSMUSG00000030474|ENSMUSG00000045502|ENSMUSG00000027398|ENSMUSG00000009628|ENSMUSG00000035828|ENSMUSG00000028211|…	http://amigo.geneontology.org/cgi-bin/amigo/term_details?term=GO:0051179
neutrophil chemotaxis	Gene Ontology	GO:0030593	11	64	3.01825e-09	1.94695e-07	ENSMUSG00000056054|ENSMUSG00000042265|ENSMUSG00000048534|ENSMUSG00000056071|ENSMUSG00000026581|ENSMUSG00000029304|ENSMUSG00000049130|ENSMUSG00000019122|ENSMUSG00000027398|ENSMUSG00000028859|ENSMUSG00000026180	http://amigo.geneontology.org/cgi-bin/amigo/term_details?term=GO:0030593
homeostatic process	Gene Ontology	GO:0042592	47	1400	4.01138e-09	2.55678e-07	ENSMUSG00000058818|ENSMUSG00000057123|ENSMUSG00000030790|ENSMUSG00000029304|ENSMUSG00000031770|ENSMUSG00000031431|ENSMUSG00000031762|ENSMUSG00000015568|ENSMUSG00000033684|ENSMUSG00000019577|ENSMUSG00000026576|ENSMUSG00000032204|ENSMUSG00000040907|ENSMUSG00000025804|ENSMUSG00000045730|ENSMUSG00000027483|ENSMUSG00000045092|ENSMUSG00000027513|ENSMUSG00000005686|ENSMUSG00000005320|ENSMUSG00000033685|…	http://amigo.geneontology.org/cgi-bin/amigo/term_details?term=GO:0042592
inflammatory response	Gene Ontology	GO:0006954	27	534	4.62156e-09	2.91104e-07	ENSMUSG00000019122|ENSMUSG00000027398|ENSMUSG00000053965|ENSMUSG00000008845|ENSMUSG00000047250|ENSMUSG00000045730|ENSMUSG00000053113|ENSMUSG00000040451|ENSMUSG00000020893|ENSMUSG00000038264|ENSMUSG00000025804|ENSMUSG00000033777|ENSMUSG00000026981|ENSMUSG00000030474|ENSMUSG00000078817|ENSMUSG00000026180|ENSMUSG00000061878|ENSMUSG00000023913|ENSMUSG00000056054|ENSMUSG00000056071|ENSMUSG00000028128|…	http://amigo.geneontology.org/cgi-bin/amigo/term_details?term=GO:0006954
myeloid leukocyte migration	Gene Ontology	GO:0097529	14	130	5.28822e-09	3.29222e-07	ENSMUSG00000029304|ENSMUSG00000056054|ENSMUSG00000042265|ENSMUSG00000048534|ENSMUSG00000025804|ENSMUSG00000056071|ENSMUSG00000026581|ENSMUSG00000023913|ENSMUSG00000049130|ENSMUSG00000019122|ENSMUSG00000025473|ENSMUSG00000027398|ENSMUSG00000028859|ENSMUSG00000026180	http://amigo.geneontology.org/cgi-bin/amigo/term_details?term=GO:0097529
vasculature development	Gene Ontology	GO:0001944	28	578	5.7567e-09	3.54269e-07	ENSMUSG00000024066|ENSMUSG00000057123|ENSMUSG00000028128|ENSMUSG00000030093|ENSMUSG00000032484|ENSMUSG00000030790|ENSMUSG00000052837|ENSMUSG00000036144|ENSMUSG00000045730|ENSMUSG00000053113|ENSMUSG00000023034|ENSMUSG00000049001|ENSMUSG00000022018|ENSMUSG00000004328|ENSMUSG00000020053|ENSMUSG00000010797|ENSMUSG00000028194|ENSMUSG00000076431|ENSMUSG00000002289|ENSMUSG00000027398|ENSMUSG00000026180|…	http://amigo.geneontology.org/cgi-bin/amigo/term_details?term=GO:0001944
regulation of transport	Gene Ontology	GO:0051049	50	1578	7.52079e-09	4.56417e-07	ENSMUSG00000057123|ENSMUSG00000019970|ENSMUSG00000033855|ENSMUSG00000028003|ENSMUSG00000041794|ENSMUSG00000058755|ENSMUSG00000078817|ENSMUSG00000055116|ENSMUSG00000015568|ENSMUSG00000020848|ENSMUSG00000033685|ENSMUSG00000003484|ENSMUSG00000026576|ENSMUSG00000027843|ENSMUSG00000026473|ENSMUSG00000025804|ENSMUSG00000047250|ENSMUSG00000045730|ENSMUSG00000029802|ENSMUSG00000078532|ENSMUSG00000021025|…	http://amigo.geneontology.org/cgi-bin/amigo/term_details?term=GO:0051049
regulation of protein modification process	Gene Ontology	GO:0031399	46	1381	7.58706e-09	4.56417e-07	ENSMUSG00000024066|ENSMUSG00000036295|ENSMUSG00000030093|ENSMUSG00000020032|ENSMUSG00000031770|ENSMUSG00000019122|ENSMUSG00000058755|ENSMUSG00000078817|ENSMUSG00000053965|ENSMUSG00000027843|ENSMUSG00000046223|ENSMUSG00000056602|ENSMUSG00000024190|ENSMUSG00000045730|ENSMUSG00000047146|ENSMUSG00000053113|ENSMUSG00000037447|ENSMUSG00000005320|ENSMUSG00000020893|ENSMUSG00000020593|ENSMUSG00000020053|…	http://amigo.geneontology.org/cgi-bin/amigo/term_details?term=GO:0031399
positive regulation of intracellular signal transduction	Gene Ontology	GO:1902533	32	751	8.65272e-09	5.14741e-07	ENSMUSG00000024066|ENSMUSG00000030093|ENSMUSG00000019122|ENSMUSG00000058755|ENSMUSG00000027398|ENSMUSG00000005824|ENSMUSG00000053965|ENSMUSG00000027843|ENSMUSG00000043099|ENSMUSG00000017707|ENSMUSG00000045730|ENSMUSG00000005320|ENSMUSG00000063632|ENSMUSG00000020053|ENSMUSG00000038264|ENSMUSG00000027947|ENSMUSG00000025804|ENSMUSG00000026981|ENSMUSG00000032496|ENSMUSG00000020427|ENSMUSG00000057604|…	http://amigo.geneontology.org/cgi-bin/amigo/term_details?term=GO:1902533
granulocyte migration	Gene Ontology	GO:0097530	12	92	9.53908e-09	5.58381e-07	ENSMUSG00000056054|ENSMUSG00000042265|ENSMUSG00000048534|ENSMUSG00000056071|ENSMUSG00000026581|ENSMUSG00000029304|ENSMUSG00000049130|ENSMUSG00000019122|ENSMUSG00000025473|ENSMUSG00000027398|ENSMUSG00000028859|ENSMUSG00000026180	http://amigo.geneontology.org/cgi-bin/amigo/term_details?term=GO:0097530
cellular response to stress	Gene Ontology	GO:0033554	46	1392	9.59489e-09	5.58381e-07	ENSMUSG00000048756|ENSMUSG00000030093|ENSMUSG00000019970|ENSMUSG00000030790|ENSMUSG00000029304|ENSMUSG00000031770|ENSMUSG00000056501|ENSMUSG00000055116|ENSMUSG00000019577|ENSMUSG00000026576|ENSMUSG00000042265|ENSMUSG00000027843|ENSMUSG00000040723|ENSMUSG00000043099|ENSMUSG00000020032|ENSMUSG00000000628|ENSMUSG00000017707|ENSMUSG00000045730|ENSMUSG00000027513|ENSMUSG00000078566|ENSMUSG00000049001|…	http://amigo.geneontology.org/cgi-bin/amigo/term_details?term=GO:0033554
membrane part	Gene Ontology	GO:0044425	111	5174	1.16203e-08	6.68977e-07	ENSMUSG00000030351|ENSMUSG00000029321|ENSMUSG00000031770|ENSMUSG00000003484|ENSMUSG00000027843|ENSMUSG00000040907|ENSMUSG00000017707|ENSMUSG00000041479|ENSMUSG00000027068|ENSMUSG00000027947|ENSMUSG00000066319|ENSMUSG00000019851|ENSMUSG00000030474|ENSMUSG00000046743|ENSMUSG00000045502|ENSMUSG00000062593|ENSMUSG00000027015|ENSMUSG00000078566|ENSMUSG00000019768|ENSMUSG00000046182|ENSMUSG00000054675|…	http://amigo.geneontology.org/cgi-bin/amigo/term_details?term=GO:0044425
cellular developmental process	Gene Ontology	GO:0048869	85	3553	1.22529e-08	6.92916e-07	ENSMUSG00000058818|ENSMUSG00000046223|ENSMUSG00000035456|ENSMUSG00000055116|ENSMUSG00000030093|ENSMUSG00000021765|ENSMUSG00000019970|ENSMUSG00000000901|ENSMUSG00000030790|ENSMUSG00000056602|ENSMUSG00000029304|ENSMUSG00000029576|ENSMUSG00000020032|ENSMUSG00000049001|ENSMUSG00000019122|ENSMUSG00000030144|ENSMUSG00000015568|ENSMUSG00000053965|ENSMUSG00000028967|ENSMUSG00000047798|ENSMUSG00000048756|…	http://amigo.geneontology.org/cgi-bin/amigo/term_details?term=GO:0048869
regulation of metabolic process	Gene Ontology	GO:0019222	104	4731	1.25368e-08	6.92916e-07	ENSMUSG00000049892|ENSMUSG00000030350|ENSMUSG00000031770|ENSMUSG00000024190|ENSMUSG00000057719|ENSMUSG00000045730|ENSMUSG00000019577|ENSMUSG00000027843|ENSMUSG00000052837|ENSMUSG00000056602|ENSMUSG00000053113|ENSMUSG00000063632|ENSMUSG00000020593|ENSMUSG00000025509|ENSMUSG00000027947|ENSMUSG00000010797|ENSMUSG00000020423|ENSMUSG00000024042|ENSMUSG00000020427|ENSMUSG00000032496|ENSMUSG00000029335|…	http://amigo.geneontology.org/cgi-bin/amigo/term_details?term=GO:0019222
response to endogenous stimulus	Gene Ontology	GO:0009719	39	1072	1.25449e-08	6.92916e-07	ENSMUSG00000038332|ENSMUSG00000042834|ENSMUSG00000024042|ENSMUSG00000029304|ENSMUSG00000056501|ENSMUSG00000055116|ENSMUSG00000019577|ENSMUSG00000027843|ENSMUSG00000052837|ENSMUSG00000079012|ENSMUSG00000027513|ENSMUSG00000053113|ENSMUSG00000023034|ENSMUSG00000021025|ENSMUSG00000063632|ENSMUSG00000020593|ENSMUSG00000020053|ENSMUSG00000026480|ENSMUSG00000021250|ENSMUSG00000024529|ENSMUSG00000026581|…	http://amigo.geneontology.org/cgi-bin/amigo/term_details?term=GO:0009719
binding	Gene Ontology	GO:0005488	187	10562	1.25538e-08	6.92916e-07	ENSMUSG00000000901|ENSMUSG00000049892|ENSMUSG00000032661|ENSMUSG00000058624|ENSMUSG00000021260|ENSMUSG00000031770|ENSMUSG00000036144|ENSMUSG00000057719|ENSMUSG00000019577|ENSMUSG00000003484|ENSMUSG00000027843|ENSMUSG00000052837|ENSMUSG00000040907|ENSMUSG00000020387|ENSMUSG00000053113|ENSMUSG00000041479|ENSMUSG00000063632|ENSMUSG00000020593|ENSMUSG00000025509|ENSMUSG00000027947|ENSMUSG00000010797|…	http://amigo.geneontology.org/cgi-bin/amigo/term_details?term=GO:0005488
response to abiotic stimulus	Gene Ontology	GO:0009628	31	733	1.76851e-08	9.66185e-07	ENSMUSG00000028211|ENSMUSG00000019970|ENSMUSG00000058755|ENSMUSG00000033685|ENSMUSG00000021886|ENSMUSG00000026576|ENSMUSG00000052837|ENSMUSG00000040907|ENSMUSG00000031431|ENSMUSG00000045730|ENSMUSG00000027513|ENSMUSG00000078566|ENSMUSG00000024042|ENSMUSG00000021025|ENSMUSG00000049001|ENSMUSG00000022018|ENSMUSG00000004328|ENSMUSG00000020053|ENSMUSG00000076431|ENSMUSG00000021250|ENSMUSG00000020893|…	http://amigo.geneontology.org/cgi-bin/amigo/term_details?term=GO:0009628
protein metabolic process	Gene Ontology	GO:0019538	94	4134	1.80781e-08	9.77679e-07	ENSMUSG00000000901|ENSMUSG00000030350|ENSMUSG00000031770|ENSMUSG00000045730|ENSMUSG00000019577|ENSMUSG00000027843|ENSMUSG00000020387|ENSMUSG00000056602|ENSMUSG00000053113|ENSMUSG00000020893|ENSMUSG00000020593|ENSMUSG00000027947|ENSMUSG00000020423|ENSMUSG00000024042|ENSMUSG00000020427|ENSMUSG00000032496|ENSMUSG00000029335|ENSMUSG00000027398|ENSMUSG00000035828|ENSMUSG00000056071|ENSMUSG00000017737|…	http://amigo.geneontology.org/cgi-bin/amigo/term_details?term=GO:0019538
regulation of cell differentiation	Gene Ontology	GO:0045595	47	1473	1.84726e-08	9.89024e-07	ENSMUSG00000024066|ENSMUSG00000030093|ENSMUSG00000022018|ENSMUSG00000000901|ENSMUSG00000030790|ENSMUSG00000086564|ENSMUSG00000019122|ENSMUSG00000055116|ENSMUSG00000015568|ENSMUSG00000053965|ENSMUSG00000005824|ENSMUSG00000048756|ENSMUSG00000052837|ENSMUSG00000020387|ENSMUSG00000053113|ENSMUSG00000024042|ENSMUSG00000021025|ENSMUSG00000042622|ENSMUSG00000049001|ENSMUSG00000020593|ENSMUSG00000020053|…	http://amigo.geneontology.org/cgi-bin/amigo/term_details?term=GO:0045595
secretion	Gene Ontology	GO:0046903	35	909	1.95578e-08	1.03675e-06	ENSMUSG00000024066|ENSMUSG00000057123|ENSMUSG00000030093|ENSMUSG00000030790|ENSMUSG00000041794|ENSMUSG00000058755|ENSMUSG00000078817|ENSMUSG00000055116|ENSMUSG00000015568|ENSMUSG00000020848|ENSMUSG00000033685|ENSMUSG00000003484|ENSMUSG00000032204|ENSMUSG00000027843|ENSMUSG00000026473|ENSMUSG00000076431|ENSMUSG00000047250|ENSMUSG00000005320|ENSMUSG00000041479|ENSMUSG00000014813|ENSMUSG00000063632|…	http://amigo.geneontology.org/cgi-bin/amigo/term_details?term=GO:0046903
cellular protein metabolic process	Gene Ontology	GO:0044267	86	3651	1.97837e-08	1.03845e-06	ENSMUSG00000030350|ENSMUSG00000031770|ENSMUSG00000079012|ENSMUSG00000019577|ENSMUSG00000027843|ENSMUSG00000020387|ENSMUSG00000056602|ENSMUSG00000053113|ENSMUSG00000020893|ENSMUSG00000020593|ENSMUSG00000027947|ENSMUSG00000020423|ENSMUSG00000024042|ENSMUSG00000020427|ENSMUSG00000032496|ENSMUSG00000029335|ENSMUSG00000027398|ENSMUSG00000035828|ENSMUSG00000056071|ENSMUSG00000017737|ENSMUSG00000078566|…	http://amigo.geneontology.org/cgi-bin/amigo/term_details?term=GO:0044267
single-organism transport	Gene Ontology	GO:0044765	59	2101	2.00727e-08	1.04339e-06	ENSMUSG00000024066|ENSMUSG00000057123|ENSMUSG00000030093|ENSMUSG00000078817|ENSMUSG00000020432|ENSMUSG00000030790|ENSMUSG00000005824|ENSMUSG00000028003|ENSMUSG00000041794|ENSMUSG00000058755|ENSMUSG00000027398|ENSMUSG00000055116|ENSMUSG00000015568|ENSMUSG00000020848|ENSMUSG00000003153|ENSMUSG00000033685|ENSMUSG00000003484|ENSMUSG00000026576|ENSMUSG00000032204|ENSMUSG00000027843|ENSMUSG00000040907|…	http://amigo.geneontology.org/cgi-bin/amigo/term_details?term=GO:0044765
regulation of cellular metabolic process	Gene Ontology	GO:0031323	99	4457	2.03586e-08	1.04808e-06	ENSMUSG00000049892|ENSMUSG00000030350|ENSMUSG00000031770|ENSMUSG00000024190|ENSMUSG00000057719|ENSMUSG00000045730|ENSMUSG00000019577|ENSMUSG00000027843|ENSMUSG00000052837|ENSMUSG00000056602|ENSMUSG00000053113|ENSMUSG00000063632|ENSMUSG00000020593|ENSMUSG00000025509|ENSMUSG00000027947|ENSMUSG00000010797|ENSMUSG00000020423|ENSMUSG00000024042|ENSMUSG00000020427|ENSMUSG00000032496|ENSMUSG00000029335|…	http://amigo.geneontology.org/cgi-bin/amigo/term_details?term=GO:0031323
granulocyte chemotaxis	Gene Ontology	GO:0071621	11	79	2.16202e-08	1.10242e-06	ENSMUSG00000056054|ENSMUSG00000042265|ENSMUSG00000048534|ENSMUSG00000056071|ENSMUSG00000026581|ENSMUSG00000029304|ENSMUSG00000049130|ENSMUSG00000019122|ENSMUSG00000027398|ENSMUSG00000028859|ENSMUSG00000026180	http://amigo.geneontology.org/cgi-bin/amigo/term_details?term=GO:0071621
regulation of secretion	Gene Ontology	GO:0051046	29	658	2.23481e-08	1.12879e-06	ENSMUSG00000057123|ENSMUSG00000041794|ENSMUSG00000058755|ENSMUSG00000078817|ENSMUSG00000055116|ENSMUSG00000015568|ENSMUSG00000020848|ENSMUSG00000033685|ENSMUSG00000003484|ENSMUSG00000027843|ENSMUSG00000026473|ENSMUSG00000047250|ENSMUSG00000005320|ENSMUSG00000041479|ENSMUSG00000014813|ENSMUSG00000063632|ENSMUSG00000022018|ENSMUSG00000020053|ENSMUSG00000030142|ENSMUSG00000076431|ENSMUSG00000026981|…	http://amigo.geneontology.org/cgi-bin/amigo/term_details?term=GO:0051046
regulation of defense response	Gene Ontology	GO:0031347	25	504	2.51711e-08	1.25949e-06	ENSMUSG00000019122|ENSMUSG00000027398|ENSMUSG00000053965|ENSMUSG00000019577|ENSMUSG00000026576|ENSMUSG00000042265|ENSMUSG00000027843|ENSMUSG00000045730|ENSMUSG00000053113|ENSMUSG00000021025|ENSMUSG00000020893|ENSMUSG00000038264|ENSMUSG00000025804|ENSMUSG00000033777|ENSMUSG00000032496|ENSMUSG00000030474|ENSMUSG00000078817|ENSMUSG00000057604|ENSMUSG00000056054|ENSMUSG00000056071|ENSMUSG00000044786|…	http://amigo.geneontology.org/cgi-bin/amigo/term_details?term=GO:0031347
cell part	Gene Ontology	GO:0044464	213	12696	2.57621e-08	1.26541e-06	ENSMUSG00000049892|ENSMUSG00000032661|ENSMUSG00000029321|ENSMUSG00000031770|ENSMUSG00000036144|ENSMUSG00000057719|ENSMUSG00000019577|ENSMUSG00000003484|ENSMUSG00000027843|ENSMUSG00000052837|ENSMUSG00000040907|ENSMUSG00000020387|ENSMUSG00000056602|ENSMUSG00000042510|ENSMUSG00000053113|ENSMUSG00000041479|ENSMUSG00000055116|ENSMUSG00000063632|ENSMUSG00000020593|ENSMUSG00000027068|ENSMUSG00000027947|…	http://amigo.geneontology.org/cgi-bin/amigo/term_details?term=GO:0044464
cell	Gene Ontology	GO:0005623	213	12696	2.57621e-08	1.26541e-06	ENSMUSG00000049892|ENSMUSG00000032661|ENSMUSG00000029321|ENSMUSG00000031770|ENSMUSG00000036144|ENSMUSG00000057719|ENSMUSG00000019577|ENSMUSG00000003484|ENSMUSG00000027843|ENSMUSG00000052837|ENSMUSG00000040907|ENSMUSG00000020387|ENSMUSG00000056602|ENSMUSG00000042510|ENSMUSG00000053113|ENSMUSG00000041479|ENSMUSG00000055116|ENSMUSG00000063632|ENSMUSG00000020593|ENSMUSG00000027068|ENSMUSG00000027947|…	http://amigo.geneontology.org/cgi-bin/amigo/term_details?term=GO:0005623
positive regulation of cellular protein metabolic process	Gene Ontology	GO:0032270	40	1155	2.9487e-08	1.43521e-06	ENSMUSG00000024066|ENSMUSG00000036295|ENSMUSG00000030093|ENSMUSG00000028128|ENSMUSG00000031770|ENSMUSG00000019122|ENSMUSG00000058755|ENSMUSG00000053965|ENSMUSG00000019851|ENSMUSG00000027843|ENSMUSG00000046223|ENSMUSG00000045730|ENSMUSG00000047146|ENSMUSG00000037447|ENSMUSG00000021025|ENSMUSG00000020593|ENSMUSG00000039304|ENSMUSG00000020053|ENSMUSG00000038264|ENSMUSG00000027947|ENSMUSG00000076431|…	http://amigo.geneontology.org/cgi-bin/amigo/term_details?term=GO:0032270
negative regulation of apoptotic process	Gene Ontology	GO:0043066	31	752	3.09243e-08	1.49161e-06	ENSMUSG00000030093|ENSMUSG00000019970|ENSMUSG00000029304|ENSMUSG00000031770|ENSMUSG00000056501|ENSMUSG00000019577|ENSMUSG00000046223|ENSMUSG00000031431|ENSMUSG00000078566|ENSMUSG00000053113|ENSMUSG00000023034|ENSMUSG00000031765|ENSMUSG00000040451|ENSMUSG00000033685|ENSMUSG00000049001|ENSMUSG00000020053|ENSMUSG00000020423|ENSMUSG00000002289|ENSMUSG00000027398|ENSMUSG00000026180|ENSMUSG00000061878|…	http://amigo.geneontology.org/cgi-bin/amigo/term_details?term=GO:0043066
blood vessel development	Gene Ontology	GO:0001568	26	555	3.91373e-08	1.85435e-06	ENSMUSG00000045092|ENSMUSG00000057123|ENSMUSG00000028128|ENSMUSG00000030093|ENSMUSG00000032484|ENSMUSG00000030790|ENSMUSG00000052837|ENSMUSG00000036144|ENSMUSG00000045730|ENSMUSG00000053113|ENSMUSG00000023034|ENSMUSG00000049001|ENSMUSG00000022018|ENSMUSG00000004328|ENSMUSG00000024066|ENSMUSG00000010797|ENSMUSG00000028194|ENSMUSG00000076431|ENSMUSG00000002289|ENSMUSG00000027398|ENSMUSG00000026180|…	http://amigo.geneontology.org/cgi-bin/amigo/term_details?term=GO:0001568
membrane	Gene Ontology	GO:0016020	139	7188	4.09713e-08	1.92421e-06	ENSMUSG00000049892|ENSMUSG00000032661|ENSMUSG00000029321|ENSMUSG00000031770|ENSMUSG00000019577|ENSMUSG00000003484|ENSMUSG00000027843|ENSMUSG00000040907|ENSMUSG00000017707|ENSMUSG00000041479|ENSMUSG00000020593|ENSMUSG00000027068|ENSMUSG00000027947|ENSMUSG00000010797|ENSMUSG00000030351|ENSMUSG00000078532|ENSMUSG00000019851|ENSMUSG00000030350|ENSMUSG00000030474|ENSMUSG00000046743|ENSMUSG00000045502|…	http://amigo.geneontology.org/cgi-bin/amigo/term_details?term=GO:0016020
negative regulation of cell communication	Gene Ontology	GO:0010648	37	1030	4.19778e-08	1.95434e-06	ENSMUSG00000038332|ENSMUSG00000078817|ENSMUSG00000030790|ENSMUSG00000031770|ENSMUSG00000024190|ENSMUSG00000058755|ENSMUSG00000027398|ENSMUSG00000055116|ENSMUSG00000005824|ENSMUSG00000033685|ENSMUSG00000048756|ENSMUSG00000027843|ENSMUSG00000043099|ENSMUSG00000046223|ENSMUSG00000047250|ENSMUSG00000045730|ENSMUSG00000053113|ENSMUSG00000040451|ENSMUSG00000021025|ENSMUSG00000020893|ENSMUSG00000020053|…	http://amigo.geneontology.org/cgi-bin/amigo/term_details?term=GO:0010648
negative regulation of signaling	Gene Ontology	GO:0023057	37	1032	4.40269e-08	2.03207e-06	ENSMUSG00000038332|ENSMUSG00000078817|ENSMUSG00000030790|ENSMUSG00000031770|ENSMUSG00000024190|ENSMUSG00000058755|ENSMUSG00000027398|ENSMUSG00000055116|ENSMUSG00000005824|ENSMUSG00000033685|ENSMUSG00000048756|ENSMUSG00000027843|ENSMUSG00000043099|ENSMUSG00000046223|ENSMUSG00000047250|ENSMUSG00000045730|ENSMUSG00000053113|ENSMUSG00000040451|ENSMUSG00000021025|ENSMUSG00000020893|ENSMUSG00000020053|…	http://amigo.geneontology.org/cgi-bin/amigo/term_details?term=GO:0023057
negative regulation of programmed cell death	Gene Ontology	GO:0043069	31	765	4.48288e-08	2.0514e-06	ENSMUSG00000030093|ENSMUSG00000019970|ENSMUSG00000029304|ENSMUSG00000031770|ENSMUSG00000056501|ENSMUSG00000019577|ENSMUSG00000046223|ENSMUSG00000031431|ENSMUSG00000078566|ENSMUSG00000053113|ENSMUSG00000023034|ENSMUSG00000031765|ENSMUSG00000040451|ENSMUSG00000033685|ENSMUSG00000049001|ENSMUSG00000020053|ENSMUSG00000020423|ENSMUSG00000002289|ENSMUSG00000027398|ENSMUSG00000026180|ENSMUSG00000061878|…	http://amigo.geneontology.org/cgi-bin/amigo/term_details?term=GO:0043069
positive regulation of cell proliferation	Gene Ontology	GO:0008284	31	766	4.6111e-08	2.09219e-06	ENSMUSG00000045092|ENSMUSG00000017737|ENSMUSG00000030093|ENSMUSG00000030790|ENSMUSG00000058755|ENSMUSG00000027843|ENSMUSG00000026473|ENSMUSG00000045730|ENSMUSG00000047146|ENSMUSG00000023034|ENSMUSG00000005320|ENSMUSG00000063632|ENSMUSG00000020053|ENSMUSG00000027947|ENSMUSG00000010797|ENSMUSG00000076431|ENSMUSG00000032496|ENSMUSG00000031217|ENSMUSG00000027398|ENSMUSG00000026180|ENSMUSG00000061878|…	http://amigo.geneontology.org/cgi-bin/amigo/term_details?term=GO:0008284
transport	Gene Ontology	GO:0006810	85	3666	5.02793e-08	2.26215e-06	ENSMUSG00000024066|ENSMUSG00000057123|ENSMUSG00000033855|ENSMUSG00000030093|ENSMUSG00000019970|ENSMUSG00000078817|ENSMUSG00000020432|ENSMUSG00000030790|ENSMUSG00000078566|ENSMUSG00000029802|ENSMUSG00000029321|ENSMUSG00000031770|ENSMUSG00000041794|ENSMUSG00000058755|ENSMUSG00000027398|ENSMUSG00000055116|ENSMUSG00000046182|ENSMUSG00000020848|ENSMUSG00000003153|ENSMUSG00000033685|ENSMUSG00000003484|…	http://amigo.geneontology.org/cgi-bin/amigo/term_details?term=GO:0006810
regulation of primary metabolic process	Gene Ontology	GO:0080090	97	4416	5.30851e-08	2.36848e-06	ENSMUSG00000049892|ENSMUSG00000030350|ENSMUSG00000031770|ENSMUSG00000024190|ENSMUSG00000045730|ENSMUSG00000019577|ENSMUSG00000027843|ENSMUSG00000052837|ENSMUSG00000056602|ENSMUSG00000053113|ENSMUSG00000063632|ENSMUSG00000020593|ENSMUSG00000025509|ENSMUSG00000027947|ENSMUSG00000010797|ENSMUSG00000020423|ENSMUSG00000024042|ENSMUSG00000020427|ENSMUSG00000032496|ENSMUSG00000029335|ENSMUSG00000045502|…	http://amigo.geneontology.org/cgi-bin/amigo/term_details?term=GO:0080090
negative regulation of intracellular signal transduction	Gene Ontology	GO:1902532	22	413	5.48919e-08	2.413e-06	ENSMUSG00000038332|ENSMUSG00000028893|ENSMUSG00000031770|ENSMUSG00000078817|ENSMUSG00000055116|ENSMUSG00000005824|ENSMUSG00000027843|ENSMUSG00000046223|ENSMUSG00000024190|ENSMUSG00000053113|ENSMUSG00000021025|ENSMUSG00000020893|ENSMUSG00000020053|ENSMUSG00000037922|ENSMUSG00000027398|ENSMUSG00000024066|ENSMUSG00000017737|ENSMUSG00000028967|ENSMUSG00000026628|ENSMUSG00000019768|ENSMUSG00000007659|…	http://amigo.geneontology.org/cgi-bin/amigo/term_details?term=GO:1902532
positive regulation of developmental process	Gene Ontology	GO:0051094	40	1183	5.49842e-08	2.413e-06	ENSMUSG00000048756|ENSMUSG00000036295|ENSMUSG00000030093|ENSMUSG00000078566|ENSMUSG00000030790|ENSMUSG00000086564|ENSMUSG00000017737|ENSMUSG00000056501|ENSMUSG00000055116|ENSMUSG00000015568|ENSMUSG00000053965|ENSMUSG00000005824|ENSMUSG00000052837|ENSMUSG00000020387|ENSMUSG00000045730|ENSMUSG00000053113|ENSMUSG00000005320|ENSMUSG00000049001|ENSMUSG00000022018|ENSMUSG00000020053|ENSMUSG00000038264|…	http://amigo.geneontology.org/cgi-bin/amigo/term_details?term=GO:0051094
single-organism localization	Gene Ontology	GO:1902578	61	2281	6.16477e-08	2.68343e-06	ENSMUSG00000024066|ENSMUSG00000057123|ENSMUSG00000030093|ENSMUSG00000078817|ENSMUSG00000020432|ENSMUSG00000030790|ENSMUSG00000005824|ENSMUSG00000028003|ENSMUSG00000041794|ENSMUSG00000058755|ENSMUSG00000027398|ENSMUSG00000055116|ENSMUSG00000015568|ENSMUSG00000020848|ENSMUSG00000003153|ENSMUSG00000033685|ENSMUSG00000003484|ENSMUSG00000026576|ENSMUSG00000032204|ENSMUSG00000027843|ENSMUSG00000040907|…	http://amigo.geneontology.org/cgi-bin/amigo/term_details?term=GO:1902578
negative regulation of response to stimulus	Gene Ontology	GO:0048585	40	1195	7.13307e-08	3.07988e-06	ENSMUSG00000038332|ENSMUSG00000078817|ENSMUSG00000030790|ENSMUSG00000031770|ENSMUSG00000027398|ENSMUSG00000055116|ENSMUSG00000005824|ENSMUSG00000033685|ENSMUSG00000048756|ENSMUSG00000027843|ENSMUSG00000043099|ENSMUSG00000046223|ENSMUSG00000024190|ENSMUSG00000045730|ENSMUSG00000053113|ENSMUSG00000040451|ENSMUSG00000021025|ENSMUSG00000020893|ENSMUSG00000020053|ENSMUSG00000025804|ENSMUSG00000032496|…	http://amigo.geneontology.org/cgi-bin/amigo/term_details?term=GO:0048585
regulation of MAPK cascade	Gene Ontology	GO:0043408	26	579	8.70192e-08	3.72721e-06	ENSMUSG00000024066|ENSMUSG00000030093|ENSMUSG00000019122|ENSMUSG00000058755|ENSMUSG00000027398|ENSMUSG00000053965|ENSMUSG00000027843|ENSMUSG00000024190|ENSMUSG00000045730|ENSMUSG00000005320|ENSMUSG00000020893|ENSMUSG00000020053|ENSMUSG00000038264|ENSMUSG00000025804|ENSMUSG00000033777|ENSMUSG00000020427|ENSMUSG00000029335|ENSMUSG00000078817|ENSMUSG00000026981|ENSMUSG00000025473|ENSMUSG00000028967|…	http://amigo.geneontology.org/cgi-bin/amigo/term_details?term=GO:0043408
response to cytokine	Gene Ontology	GO:0034097	23	463	9.05161e-08	3.81978e-06	ENSMUSG00000048756|ENSMUSG00000056501|ENSMUSG00000058755|ENSMUSG00000027398|ENSMUSG00000052837|ENSMUSG00000079012|ENSMUSG00000053113|ENSMUSG00000021025|ENSMUSG00000071713|ENSMUSG00000058818|ENSMUSG00000027947|ENSMUSG00000025804|ENSMUSG00000056749|ENSMUSG00000078817|ENSMUSG00000061878|ENSMUSG00000026981|ENSMUSG00000028128|ENSMUSG00000044786|ENSMUSG00000007659|ENSMUSG00000066361|ENSMUSG00000051748|…	http://amigo.geneontology.org/cgi-bin/amigo/term_details?term=GO:0034097
cell migration	Gene Ontology	GO:0016477	37	1063	9.06074e-08	3.81978e-06	ENSMUSG00000045092|ENSMUSG00000028128|ENSMUSG00000030093|ENSMUSG00000029304|ENSMUSG00000019122|ENSMUSG00000078817|ENSMUSG00000005824|ENSMUSG00000042265|ENSMUSG00000027843|ENSMUSG00000036144|ENSMUSG00000023034|ENSMUSG00000005320|ENSMUSG00000014813|ENSMUSG00000049001|ENSMUSG00000022018|ENSMUSG00000020053|ENSMUSG00000038264|ENSMUSG00000025804|ENSMUSG00000026981|ENSMUSG00000026581|ENSMUSG00000020427|…	http://amigo.geneontology.org/cgi-bin/amigo/term_details?term=GO:0016477
circulatory system development	Gene Ontology	GO:0072359	33	880	9.2679e-08	3.84654e-06	ENSMUSG00000024066|ENSMUSG00000057123|ENSMUSG00000028128|ENSMUSG00000030093|ENSMUSG00000032484|ENSMUSG00000030790|ENSMUSG00000037016|ENSMUSG00000052837|ENSMUSG00000036144|ENSMUSG00000045730|ENSMUSG00000053113|ENSMUSG00000023034|ENSMUSG00000049001|ENSMUSG00000022018|ENSMUSG00000004328|ENSMUSG00000020053|ENSMUSG00000010797|ENSMUSG00000028194|ENSMUSG00000076431|ENSMUSG00000024042|ENSMUSG00000002289|…	http://amigo.geneontology.org/cgi-bin/amigo/term_details?term=GO:0072359
cardiovascular system development	Gene Ontology	GO:0072358	33	880	9.2679e-08	3.84654e-06	ENSMUSG00000024066|ENSMUSG00000057123|ENSMUSG00000028128|ENSMUSG00000030093|ENSMUSG00000032484|ENSMUSG00000030790|ENSMUSG00000037016|ENSMUSG00000052837|ENSMUSG00000036144|ENSMUSG00000045730|ENSMUSG00000053113|ENSMUSG00000023034|ENSMUSG00000049001|ENSMUSG00000022018|ENSMUSG00000004328|ENSMUSG00000020053|ENSMUSG00000010797|ENSMUSG00000028194|ENSMUSG00000076431|ENSMUSG00000024042|ENSMUSG00000002289|…	http://amigo.geneontology.org/cgi-bin/amigo/term_details?term=GO:0072358
regulation of multicellular organismal development	Gene Ontology	GO:2000026	48	1611	9.73779e-08	4.01047e-06	ENSMUSG00000024066|ENSMUSG00000036295|ENSMUSG00000030093|ENSMUSG00000028128|ENSMUSG00000032484|ENSMUSG00000030790|ENSMUSG00000086564|ENSMUSG00000056501|ENSMUSG00000055116|ENSMUSG00000048756|ENSMUSG00000020387|ENSMUSG00000031431|ENSMUSG00000045730|ENSMUSG00000021025|ENSMUSG00000042622|ENSMUSG00000049001|ENSMUSG00000022018|ENSMUSG00000020053|ENSMUSG00000038264|ENSMUSG00000010797|ENSMUSG00000037962|…	http://amigo.geneontology.org/cgi-bin/amigo/term_details?term=GO:2000026
blood vessel morphogenesis	Gene Ontology	GO:0048514	23	467	1.04831e-07	4.28447e-06	ENSMUSG00000045092|ENSMUSG00000057123|ENSMUSG00000028128|ENSMUSG00000030093|ENSMUSG00000032484|ENSMUSG00000030790|ENSMUSG00000052837|ENSMUSG00000036144|ENSMUSG00000045730|ENSMUSG00000023034|ENSMUSG00000049001|ENSMUSG00000022018|ENSMUSG00000004328|ENSMUSG00000024066|ENSMUSG00000028194|ENSMUSG00000076431|ENSMUSG00000002289|ENSMUSG00000027398|ENSMUSG00000026180|ENSMUSG00000061878|ENSMUSG00000025473|…	http://amigo.geneontology.org/cgi-bin/amigo/term_details?term=GO:0048514
regulation of protein phosphorylation	Gene Ontology	GO:0001932	38	1118	1.07531e-07	4.36151e-06	ENSMUSG00000024066|ENSMUSG00000036295|ENSMUSG00000030093|ENSMUSG00000019122|ENSMUSG00000058755|ENSMUSG00000078817|ENSMUSG00000053965|ENSMUSG00000027843|ENSMUSG00000046223|ENSMUSG00000024190|ENSMUSG00000045730|ENSMUSG00000053113|ENSMUSG00000005320|ENSMUSG00000020893|ENSMUSG00000022018|ENSMUSG00000020053|ENSMUSG00000038264|ENSMUSG00000027947|ENSMUSG00000025804|ENSMUSG00000033777|ENSMUSG00000020427|…	http://amigo.geneontology.org/cgi-bin/amigo/term_details?term=GO:0001932
MAPK cascade	Gene Ontology	GO:0000165	27	629	1.16229e-07	4.67889e-06	ENSMUSG00000024066|ENSMUSG00000030093|ENSMUSG00000019122|ENSMUSG00000058755|ENSMUSG00000027398|ENSMUSG00000053965|ENSMUSG00000027843|ENSMUSG00000024190|ENSMUSG00000045730|ENSMUSG00000005320|ENSMUSG00000020893|ENSMUSG00000020053|ENSMUSG00000038264|ENSMUSG00000025804|ENSMUSG00000033777|ENSMUSG00000020427|ENSMUSG00000029335|ENSMUSG00000078817|ENSMUSG00000026981|ENSMUSG00000025473|ENSMUSG00000028967|…	http://amigo.geneontology.org/cgi-bin/amigo/term_details?term=GO:0000165
signal transduction by protein phosphorylation	Gene Ontology	GO:0023014	27	631	1.23522e-07	4.93533e-06	ENSMUSG00000024066|ENSMUSG00000030093|ENSMUSG00000019122|ENSMUSG00000058755|ENSMUSG00000027398|ENSMUSG00000053965|ENSMUSG00000027843|ENSMUSG00000024190|ENSMUSG00000045730|ENSMUSG00000005320|ENSMUSG00000020893|ENSMUSG00000020053|ENSMUSG00000038264|ENSMUSG00000025804|ENSMUSG00000033777|ENSMUSG00000020427|ENSMUSG00000029335|ENSMUSG00000078817|ENSMUSG00000026981|ENSMUSG00000025473|ENSMUSG00000028967|…	http://amigo.geneontology.org/cgi-bin/amigo/term_details?term=GO:0023014
positive regulation of protein metabolic process	Gene Ontology	GO:0051247	40	1237	1.72045e-07	6.82319e-06	ENSMUSG00000024066|ENSMUSG00000036295|ENSMUSG00000030093|ENSMUSG00000028128|ENSMUSG00000031770|ENSMUSG00000019122|ENSMUSG00000058755|ENSMUSG00000053965|ENSMUSG00000019851|ENSMUSG00000027843|ENSMUSG00000046223|ENSMUSG00000045730|ENSMUSG00000047146|ENSMUSG00000037447|ENSMUSG00000021025|ENSMUSG00000020593|ENSMUSG00000039304|ENSMUSG00000020053|ENSMUSG00000038264|ENSMUSG00000027947|ENSMUSG00000076431|…	http://amigo.geneontology.org/cgi-bin/amigo/term_details?term=GO:0051247
cellular protein modification process	Gene Ontology	GO:0006464	69	2816	1.89063e-07	7.38862e-06	ENSMUSG00000024066|ENSMUSG00000036295|ENSMUSG00000035456|ENSMUSG00000033777|ENSMUSG00000030093|ENSMUSG00000030074|ENSMUSG00000039109|ENSMUSG00000019970|ENSMUSG00000056602|ENSMUSG00000020032|ENSMUSG00000024222|ENSMUSG00000031770|ENSMUSG00000061718|ENSMUSG00000058755|ENSMUSG00000078817|ENSMUSG00000027513|ENSMUSG00000053965|ENSMUSG00000025330|ENSMUSG00000019577|ENSMUSG00000030350|ENSMUSG00000030087|…	http://amigo.geneontology.org/cgi-bin/amigo/term_details?term=GO:0006464
protein modification process	Gene Ontology	GO:0036211	69	2816	1.89063e-07	7.38862e-06	ENSMUSG00000024066|ENSMUSG00000036295|ENSMUSG00000035456|ENSMUSG00000033777|ENSMUSG00000030093|ENSMUSG00000030074|ENSMUSG00000039109|ENSMUSG00000019970|ENSMUSG00000056602|ENSMUSG00000020032|ENSMUSG00000024222|ENSMUSG00000031770|ENSMUSG00000061718|ENSMUSG00000058755|ENSMUSG00000078817|ENSMUSG00000027513|ENSMUSG00000053965|ENSMUSG00000025330|ENSMUSG00000019577|ENSMUSG00000030350|ENSMUSG00000030087|…	http://amigo.geneontology.org/cgi-bin/amigo/term_details?term=GO:0036211
protein phosphorylation	Gene Ontology	GO:0006468	45	1500	2.14991e-07	8.34101e-06	ENSMUSG00000024066|ENSMUSG00000036295|ENSMUSG00000030093|ENSMUSG00000019970|ENSMUSG00000020032|ENSMUSG00000061718|ENSMUSG00000058755|ENSMUSG00000078817|ENSMUSG00000053965|ENSMUSG00000019577|ENSMUSG00000027843|ENSMUSG00000046223|ENSMUSG00000024210|ENSMUSG00000024190|ENSMUSG00000045730|ENSMUSG00000053113|ENSMUSG00000005320|ENSMUSG00000020893|ENSMUSG00000022018|ENSMUSG00000020053|ENSMUSG00000038264|…	http://amigo.geneontology.org/cgi-bin/amigo/term_details?term=GO:0006468
establishment of localization	Gene Ontology	GO:0051234	85	3794	2.24732e-07	8.65621e-06	ENSMUSG00000024066|ENSMUSG00000057123|ENSMUSG00000033855|ENSMUSG00000030093|ENSMUSG00000019970|ENSMUSG00000078817|ENSMUSG00000020432|ENSMUSG00000030790|ENSMUSG00000078566|ENSMUSG00000029802|ENSMUSG00000029321|ENSMUSG00000031770|ENSMUSG00000041794|ENSMUSG00000058755|ENSMUSG00000027398|ENSMUSG00000055116|ENSMUSG00000046182|ENSMUSG00000020848|ENSMUSG00000003153|ENSMUSG00000033685|ENSMUSG00000003484|…	http://amigo.geneontology.org/cgi-bin/amigo/term_details?term=GO:0051234
regulation of cysteine-type endopeptidase activity	Gene Ontology	GO:2000116	14	181	2.4485e-07	9.36376e-06	ENSMUSG00000020053|ENSMUSG00000024066|ENSMUSG00000056054|ENSMUSG00000017737|ENSMUSG00000028128|ENSMUSG00000056071|ENSMUSG00000024521|ENSMUSG00000046223|ENSMUSG00000031770|ENSMUSG00000019851|ENSMUSG00000078817|ENSMUSG00000023034|ENSMUSG00000024778|ENSMUSG00000039304	http://amigo.geneontology.org/cgi-bin/amigo/term_details?term=GO:2000116
negative regulation of signal transduction	Gene Ontology	GO:0009968	33	922	2.59264e-07	9.84469e-06	ENSMUSG00000038332|ENSMUSG00000028893|ENSMUSG00000030790|ENSMUSG00000031770|ENSMUSG00000078817|ENSMUSG00000055116|ENSMUSG00000005824|ENSMUSG00000048756|ENSMUSG00000027843|ENSMUSG00000043099|ENSMUSG00000046223|ENSMUSG00000024190|ENSMUSG00000045730|ENSMUSG00000053113|ENSMUSG00000040451|ENSMUSG00000021025|ENSMUSG00000020893|ENSMUSG00000020053|ENSMUSG00000032496|ENSMUSG00000037922|ENSMUSG00000027398|…	http://amigo.geneontology.org/cgi-bin/amigo/term_details?term=GO:0009968
primary metabolic process	Gene Ontology	GO:0044238	144	7757	2.71373e-07	1.02319e-05	ENSMUSG00000000901|ENSMUSG00000049892|ENSMUSG00000030350|ENSMUSG00000058624|ENSMUSG00000021260|ENSMUSG00000031770|ENSMUSG00000024190|ENSMUSG00000045730|ENSMUSG00000019577|ENSMUSG00000003484|ENSMUSG00000027843|ENSMUSG00000052837|ENSMUSG00000020387|ENSMUSG00000056602|ENSMUSG00000017707|ENSMUSG00000053113|ENSMUSG00000063632|ENSMUSG00000020593|ENSMUSG00000027068|ENSMUSG00000027947|ENSMUSG00000010797|…	http://amigo.geneontology.org/cgi-bin/amigo/term_details?term=GO:0044238
negative regulation of cellular protein metabolic process	Gene Ontology	GO:0032269	30	790	2.85799e-07	1.07005e-05	ENSMUSG00000024066|ENSMUSG00000032484|ENSMUSG00000031770|ENSMUSG00000078817|ENSMUSG00000027843|ENSMUSG00000046223|ENSMUSG00000056602|ENSMUSG00000024190|ENSMUSG00000079012|ENSMUSG00000053113|ENSMUSG00000023034|ENSMUSG00000020893|ENSMUSG00000020053|ENSMUSG00000030087|ENSMUSG00000076431|ENSMUSG00000020423|ENSMUSG00000020427|ENSMUSG00000037922|ENSMUSG00000027398|ENSMUSG00000044786|ENSMUSG00000028893|…	http://amigo.geneontology.org/cgi-bin/amigo/term_details?term=GO:0032269
regulation of hydrolase activity	Gene Ontology	GO:0051336	29	758	3.93655e-07	1.45953e-05	ENSMUSG00000024066|ENSMUSG00000032661|ENSMUSG00000017737|ENSMUSG00000032484|ENSMUSG00000031770|ENSMUSG00000019122|ENSMUSG00000057719|ENSMUSG00000045730|ENSMUSG00000021886|ENSMUSG00000026576|ENSMUSG00000026358|ENSMUSG00000046223|ENSMUSG00000079012|ENSMUSG00000023034|ENSMUSG00000039304|ENSMUSG00000020053|ENSMUSG00000020032|ENSMUSG00000019851|ENSMUSG00000032496|ENSMUSG00000002289|ENSMUSG00000078817|…	http://amigo.geneontology.org/cgi-bin/amigo/term_details?term=GO:0051336
regulation of macromolecule metabolic process	Gene Ontology	GO:0060255	94	4413	3.95278e-07	1.45953e-05	ENSMUSG00000049892|ENSMUSG00000030350|ENSMUSG00000031770|ENSMUSG00000024190|ENSMUSG00000045730|ENSMUSG00000027843|ENSMUSG00000052837|ENSMUSG00000056602|ENSMUSG00000053113|ENSMUSG00000063632|ENSMUSG00000020593|ENSMUSG00000027947|ENSMUSG00000010797|ENSMUSG00000020423|ENSMUSG00000024042|ENSMUSG00000020427|ENSMUSG00000032496|ENSMUSG00000029335|ENSMUSG00000027398|ENSMUSG00000009628|ENSMUSG00000056071|…	http://amigo.geneontology.org/cgi-bin/amigo/term_details?term=GO:0060255
chemical homeostasis	Gene Ontology	GO:0048878	32	901	4.69214e-07	1.72067e-05	ENSMUSG00000045092|ENSMUSG00000057123|ENSMUSG00000030790|ENSMUSG00000031770|ENSMUSG00000027398|ENSMUSG00000015568|ENSMUSG00000019577|ENSMUSG00000026576|ENSMUSG00000032204|ENSMUSG00000040907|ENSMUSG00000025804|ENSMUSG00000027483|ENSMUSG00000027513|ENSMUSG00000005320|ENSMUSG00000033685|ENSMUSG00000025509|ENSMUSG00000020053|ENSMUSG00000044026|ENSMUSG00000076431|ENSMUSG00000032496|ENSMUSG00000002289|…	http://amigo.geneontology.org/cgi-bin/amigo/term_details?term=GO:0048878
regulation of inflammatory response	Gene Ontology	GO:0050727	16	257	5.39554e-07	1.96515e-05	ENSMUSG00000038264|ENSMUSG00000056054|ENSMUSG00000056071|ENSMUSG00000078817|ENSMUSG00000020893|ENSMUSG00000019768|ENSMUSG00000030474|ENSMUSG00000053113|ENSMUSG00000019122|ENSMUSG00000060063|ENSMUSG00000025473|ENSMUSG00000027398|ENSMUSG00000045730|ENSMUSG00000053965|ENSMUSG00000026073|ENSMUSG00000044786	http://amigo.geneontology.org/cgi-bin/amigo/term_details?term=GO:0050727
positive regulation of response to external stimulus	Gene Ontology	GO:0032103	15	225	5.44582e-07	1.97006e-05	ENSMUSG00000045092|ENSMUSG00000056054|ENSMUSG00000005824|ENSMUSG00000025804|ENSMUSG00000056071|ENSMUSG00000026581|ENSMUSG00000023913|ENSMUSG00000049130|ENSMUSG00000021508|ENSMUSG00000060063|ENSMUSG00000025473|ENSMUSG00000027398|ENSMUSG00000026180|ENSMUSG00000053965|ENSMUSG00000019122	http://amigo.geneontology.org/cgi-bin/amigo/term_details?term=GO:0032103
immune response	Gene Ontology	GO:0006955	33	955	5.55113e-07	1.99468e-05	ENSMUSG00000030144|ENSMUSG00000032661|ENSMUSG00000030790|ENSMUSG00000019122|ENSMUSG00000058755|ENSMUSG00000056071|ENSMUSG00000005824|ENSMUSG00000025330|ENSMUSG00000062593|ENSMUSG00000042265|ENSMUSG00000027843|ENSMUSG00000017707|ENSMUSG00000027483|ENSMUSG00000021025|ENSMUSG00000022018|ENSMUSG00000039304|ENSMUSG00000058818|ENSMUSG00000038264|ENSMUSG00000030142|ENSMUSG00000025804|ENSMUSG00000033777|…	http://amigo.geneontology.org/cgi-bin/amigo/term_details?term=GO:0006955
positive regulation of multicellular organismal process	Gene Ontology	GO:0051240	42	1401	5.84229e-07	2.0715e-05	ENSMUSG00000048756|ENSMUSG00000057123|ENSMUSG00000036295|ENSMUSG00000030093|ENSMUSG00000028128|ENSMUSG00000030790|ENSMUSG00000086564|ENSMUSG00000029304|ENSMUSG00000056501|ENSMUSG00000055116|ENSMUSG00000015568|ENSMUSG00000053965|ENSMUSG00000028194|ENSMUSG00000027843|ENSMUSG00000020387|ENSMUSG00000047250|ENSMUSG00000045730|ENSMUSG00000005320|ENSMUSG00000049001|ENSMUSG00000022018|ENSMUSG00000020053|…	http://amigo.geneontology.org/cgi-bin/amigo/term_details?term=GO:0051240
regulation of phosphate metabolic process	Gene Ontology	GO:0019220	42	1401	5.84229e-07	2.0715e-05	ENSMUSG00000024066|ENSMUSG00000036295|ENSMUSG00000030093|ENSMUSG00000078817|ENSMUSG00000030790|ENSMUSG00000020032|ENSMUSG00000019122|ENSMUSG00000058755|ENSMUSG00000057719|ENSMUSG00000053965|ENSMUSG00000021886|ENSMUSG00000027843|ENSMUSG00000046223|ENSMUSG00000024190|ENSMUSG00000045730|ENSMUSG00000053113|ENSMUSG00000005320|ENSMUSG00000020893|ENSMUSG00000022018|ENSMUSG00000020053|ENSMUSG00000038264|…	http://amigo.geneontology.org/cgi-bin/amigo/term_details?term=GO:0019220
biological adhesion	Gene Ontology	GO:0022610	40	1300	5.92658e-07	2.0818e-05	ENSMUSG00000045092|ENSMUSG00000024053|ENSMUSG00000029304|ENSMUSG00000029576|ENSMUSG00000056501|ENSMUSG00000005824|ENSMUSG00000053965|ENSMUSG00000037016|ENSMUSG00000026576|ENSMUSG00000027843|ENSMUSG00000020032|ENSMUSG00000027483|ENSMUSG00000045730|ENSMUSG00000049001|ENSMUSG00000022018|ENSMUSG00000020053|ENSMUSG00000030142|ENSMUSG00000076431|ENSMUSG00000027656|ENSMUSG00000026981|ENSMUSG00000026581|…	http://amigo.geneontology.org/cgi-bin/amigo/term_details?term=GO:0022610
regulation of phosphorus metabolic process	Gene Ontology	GO:0051174	42	1402	5.94912e-07	2.0818e-05	ENSMUSG00000024066|ENSMUSG00000036295|ENSMUSG00000030093|ENSMUSG00000078817|ENSMUSG00000030790|ENSMUSG00000020032|ENSMUSG00000019122|ENSMUSG00000058755|ENSMUSG00000057719|ENSMUSG00000053965|ENSMUSG00000021886|ENSMUSG00000027843|ENSMUSG00000046223|ENSMUSG00000024190|ENSMUSG00000045730|ENSMUSG00000053113|ENSMUSG00000005320|ENSMUSG00000020893|ENSMUSG00000022018|ENSMUSG00000020053|ENSMUSG00000038264|…	http://amigo.geneontology.org/cgi-bin/amigo/term_details?term=GO:0051174
response to hormone	Gene Ontology	GO:0009725	23	523	6.99563e-07	2.40184e-05	ENSMUSG00000027513|ENSMUSG00000029304|ENSMUSG00000055116|ENSMUSG00000019577|ENSMUSG00000052837|ENSMUSG00000079012|ENSMUSG00000053113|ENSMUSG00000023034|ENSMUSG00000020893|ENSMUSG00000020593|ENSMUSG00000020053|ENSMUSG00000026480|ENSMUSG00000024042|ENSMUSG00000024529|ENSMUSG00000027398|ENSMUSG00000026981|ENSMUSG00000028893|ENSMUSG00000019970|ENSMUSG00000044786|ENSMUSG00000019768|ENSMUSG00000020108|…	http://amigo.geneontology.org/cgi-bin/amigo/term_details?term=GO:0009725
regulation of cysteine-type endopeptidase activity involved in apoptotic process	Gene Ontology	GO:0043281	13	169	6.99827e-07	2.40184e-05	ENSMUSG00000020053|ENSMUSG00000024066|ENSMUSG00000056054|ENSMUSG00000017737|ENSMUSG00000028128|ENSMUSG00000056071|ENSMUSG00000024521|ENSMUSG00000046223|ENSMUSG00000031770|ENSMUSG00000039304|ENSMUSG00000078817|ENSMUSG00000023034|ENSMUSG00000024778	http://amigo.geneontology.org/cgi-bin/amigo/term_details?term=GO:0043281
cell motility	Gene Ontology	GO:0048870	37	1161	7.30902e-07	2.47674e-05	ENSMUSG00000045092|ENSMUSG00000028128|ENSMUSG00000030093|ENSMUSG00000029304|ENSMUSG00000019122|ENSMUSG00000078817|ENSMUSG00000005824|ENSMUSG00000042265|ENSMUSG00000027843|ENSMUSG00000036144|ENSMUSG00000023034|ENSMUSG00000005320|ENSMUSG00000014813|ENSMUSG00000049001|ENSMUSG00000022018|ENSMUSG00000020053|ENSMUSG00000038264|ENSMUSG00000025804|ENSMUSG00000026981|ENSMUSG00000026581|ENSMUSG00000020427|…	http://amigo.geneontology.org/cgi-bin/amigo/term_details?term=GO:0048870
localization of cell	Gene Ontology	GO:0051674	37	1161	7.30902e-07	2.47674e-05	ENSMUSG00000045092|ENSMUSG00000028128|ENSMUSG00000030093|ENSMUSG00000029304|ENSMUSG00000019122|ENSMUSG00000078817|ENSMUSG00000005824|ENSMUSG00000042265|ENSMUSG00000027843|ENSMUSG00000036144|ENSMUSG00000023034|ENSMUSG00000005320|ENSMUSG00000014813|ENSMUSG00000049001|ENSMUSG00000022018|ENSMUSG00000020053|ENSMUSG00000038264|ENSMUSG00000025804|ENSMUSG00000026981|ENSMUSG00000026581|ENSMUSG00000020427|…	http://amigo.geneontology.org/cgi-bin/amigo/term_details?term=GO:0051674
regulation of phosphorylation	Gene Ontology	GO:0042325	38	1211	7.3639e-07	2.47964e-05	ENSMUSG00000024066|ENSMUSG00000036295|ENSMUSG00000030093|ENSMUSG00000019122|ENSMUSG00000058755|ENSMUSG00000078817|ENSMUSG00000053965|ENSMUSG00000027843|ENSMUSG00000046223|ENSMUSG00000024190|ENSMUSG00000045730|ENSMUSG00000053113|ENSMUSG00000005320|ENSMUSG00000020893|ENSMUSG00000022018|ENSMUSG00000020053|ENSMUSG00000038264|ENSMUSG00000027947|ENSMUSG00000025804|ENSMUSG00000033777|ENSMUSG00000020427|…	http://amigo.geneontology.org/cgi-bin/amigo/term_details?term=GO:0042325
positive regulation of transcription from RNA polymerase II promoter	Gene Ontology	GO:0045944	32	921	7.43583e-07	2.48821e-05	ENSMUSG00000045092|ENSMUSG00000030093|ENSMUSG00000056501|ENSMUSG00000058755|ENSMUSG00000038402|ENSMUSG00000055116|ENSMUSG00000027513|ENSMUSG00000048756|ENSMUSG00000052837|ENSMUSG00000036144|ENSMUSG00000045730|ENSMUSG00000047146|ENSMUSG00000023034|ENSMUSG00000037447|ENSMUSG00000021025|ENSMUSG00000063632|ENSMUSG00000020593|ENSMUSG00000004328|ENSMUSG00000020053|ENSMUSG00000010797|ENSMUSG00000030087|…	http://amigo.geneontology.org/cgi-bin/amigo/term_details?term=GO:0045944
apoptotic signaling pathway	Gene Ontology	GO:0097190	23	526	7.68553e-07	2.5558e-05	ENSMUSG00000048756|ENSMUSG00000078566|ENSMUSG00000031770|ENSMUSG00000056501|ENSMUSG00000058755|ENSMUSG00000043099|ENSMUSG00000046223|ENSMUSG00000017707|ENSMUSG00000040451|ENSMUSG00000039304|ENSMUSG00000020053|ENSMUSG00000027398|ENSMUSG00000056054|ENSMUSG00000028211|ENSMUSG00000056071|ENSMUSG00000024521|ENSMUSG00000017737|ENSMUSG00000023067|ENSMUSG00000026628|ENSMUSG00000024778|ENSMUSG00000007659|…	http://amigo.geneontology.org/cgi-bin/amigo/term_details?term=GO:0097190
regulation of secretion by cell	Gene Ontology	GO:1903530	25	611	8.09795e-07	2.67632e-05	ENSMUSG00000057123|ENSMUSG00000041794|ENSMUSG00000058755|ENSMUSG00000078817|ENSMUSG00000055116|ENSMUSG00000015568|ENSMUSG00000020848|ENSMUSG00000033685|ENSMUSG00000027843|ENSMUSG00000026473|ENSMUSG00000047250|ENSMUSG00000005320|ENSMUSG00000041479|ENSMUSG00000063632|ENSMUSG00000022018|ENSMUSG00000020053|ENSMUSG00000030142|ENSMUSG00000076431|ENSMUSG00000045502|ENSMUSG00000027398|ENSMUSG00000061878|…	http://amigo.geneontology.org/cgi-bin/amigo/term_details?term=GO:1903530
negative regulation of metabolic process	Gene Ontology	GO:0009892	53	2015	8.82234e-07	2.89784e-05	ENSMUSG00000024066|ENSMUSG00000078566|ENSMUSG00000028211|ENSMUSG00000032484|ENSMUSG00000049892|ENSMUSG00000056602|ENSMUSG00000031770|ENSMUSG00000061718|ENSMUSG00000057719|ENSMUSG00000055116|ENSMUSG00000048756|ENSMUSG00000027843|ENSMUSG00000052837|ENSMUSG00000043099|ENSMUSG00000046223|ENSMUSG00000026628|ENSMUSG00000031431|ENSMUSG00000079012|ENSMUSG00000047146|ENSMUSG00000053113|ENSMUSG00000023034|…	http://amigo.geneontology.org/cgi-bin/amigo/term_details?term=GO:0009892
negative regulation of protein metabolic process	Gene Ontology	GO:0051248	30	844	1.07623e-06	3.5094e-05	ENSMUSG00000024066|ENSMUSG00000032484|ENSMUSG00000031770|ENSMUSG00000078817|ENSMUSG00000027843|ENSMUSG00000046223|ENSMUSG00000056602|ENSMUSG00000024190|ENSMUSG00000079012|ENSMUSG00000053113|ENSMUSG00000023034|ENSMUSG00000020893|ENSMUSG00000020053|ENSMUSG00000030087|ENSMUSG00000076431|ENSMUSG00000020423|ENSMUSG00000020427|ENSMUSG00000037922|ENSMUSG00000027398|ENSMUSG00000044786|ENSMUSG00000028893|…	http://amigo.geneontology.org/cgi-bin/amigo/term_details?term=GO:0051248
positive regulation of protein modification process	Gene Ontology	GO:0031401	32	938	1.08713e-06	3.5094e-05	ENSMUSG00000024066|ENSMUSG00000036295|ENSMUSG00000030093|ENSMUSG00000019122|ENSMUSG00000058755|ENSMUSG00000053965|ENSMUSG00000027843|ENSMUSG00000046223|ENSMUSG00000045730|ENSMUSG00000047146|ENSMUSG00000037447|ENSMUSG00000005320|ENSMUSG00000020593|ENSMUSG00000020053|ENSMUSG00000038264|ENSMUSG00000027947|ENSMUSG00000025804|ENSMUSG00000020427|ENSMUSG00000032496|ENSMUSG00000029335|ENSMUSG00000027398|…	http://amigo.geneontology.org/cgi-bin/amigo/term_details?term=GO:0031401
regulation of catalytic activity	Gene Ontology	GO:0050790	42	1436	1.08808e-06	3.5094e-05	ENSMUSG00000024066|ENSMUSG00000032661|ENSMUSG00000028128|ENSMUSG00000078817|ENSMUSG00000032484|ENSMUSG00000031770|ENSMUSG00000019122|ENSMUSG00000057719|ENSMUSG00000045730|ENSMUSG00000053965|ENSMUSG00000019851|ENSMUSG00000021886|ENSMUSG00000026576|ENSMUSG00000027843|ENSMUSG00000046223|ENSMUSG00000024190|ENSMUSG00000079012|ENSMUSG00000053113|ENSMUSG00000023034|ENSMUSG00000005320|ENSMUSG00000022018|…	http://amigo.geneontology.org/cgi-bin/amigo/term_details?term=GO:0050790
regulation of peptidase activity	Gene Ontology	GO:0052547	17	307	1.11079e-06	3.56118e-05	ENSMUSG00000020053|ENSMUSG00000024066|ENSMUSG00000056054|ENSMUSG00000046223|ENSMUSG00000028128|ENSMUSG00000056071|ENSMUSG00000024521|ENSMUSG00000032484|ENSMUSG00000079012|ENSMUSG00000017737|ENSMUSG00000031770|ENSMUSG00000019851|ENSMUSG00000078817|ENSMUSG00000023034|ENSMUSG00000066361|ENSMUSG00000024778|ENSMUSG00000039304	http://amigo.geneontology.org/cgi-bin/amigo/term_details?term=GO:0052547
secretion by cell	Gene Ontology	GO:0032940	29	801	1.15382e-06	3.6771e-05	ENSMUSG00000030093|ENSMUSG00000057123|ENSMUSG00000030790|ENSMUSG00000041794|ENSMUSG00000058755|ENSMUSG00000078817|ENSMUSG00000055116|ENSMUSG00000015568|ENSMUSG00000020848|ENSMUSG00000033685|ENSMUSG00000042265|ENSMUSG00000027843|ENSMUSG00000026473|ENSMUSG00000076431|ENSMUSG00000047250|ENSMUSG00000005320|ENSMUSG00000041479|ENSMUSG00000063632|ENSMUSG00000022018|ENSMUSG00000020053|ENSMUSG00000030142|…	http://amigo.geneontology.org/cgi-bin/amigo/term_details?term=GO:0032940
release of cytochrome c from mitochondria	Gene Ontology	GO:0001836	8	54	1.22819e-06	3.89096e-05	ENSMUSG00000020053|ENSMUSG00000017737|ENSMUSG00000024521|ENSMUSG00000046223|ENSMUSG00000078566|ENSMUSG00000039304|ENSMUSG00000007659|ENSMUSG00000024778	http://amigo.geneontology.org/cgi-bin/amigo/term_details?term=GO:0001836
anatomical structure morphogenesis	Gene Ontology	GO:0009653	58	2323	1.26767e-06	3.9924e-05	ENSMUSG00000024066|ENSMUSG00000057123|ENSMUSG00000028128|ENSMUSG00000030093|ENSMUSG00000078566|ENSMUSG00000032484|ENSMUSG00000030790|ENSMUSG00000029576|ENSMUSG00000049001|ENSMUSG00000056501|ENSMUSG00000038402|ENSMUSG00000005824|ENSMUSG00000037016|ENSMUSG00000048756|ENSMUSG00000052837|ENSMUSG00000020387|ENSMUSG00000056602|ENSMUSG00000036144|ENSMUSG00000045730|ENSMUSG00000047146|ENSMUSG00000053113|…	http://amigo.geneontology.org/cgi-bin/amigo/term_details?term=GO:0009653
neuron death	Gene Ontology	GO:0070997	17	311	1.31388e-06	4.11374e-05	ENSMUSG00000020053|ENSMUSG00000048756|ENSMUSG00000025473|ENSMUSG00000027398|ENSMUSG00000026480|ENSMUSG00000020423|ENSMUSG00000024521|ENSMUSG00000031765|ENSMUSG00000036144|ENSMUSG00000049130|ENSMUSG00000019768|ENSMUSG00000007659|ENSMUSG00000020108|ENSMUSG00000078566|ENSMUSG00000049001|ENSMUSG00000024778|ENSMUSG00000056501	http://amigo.geneontology.org/cgi-bin/amigo/term_details?term=GO:0070997
phosphorylation	Gene Ontology	GO:0016310	48	1770	1.38201e-06	4.28554e-05	ENSMUSG00000024066|ENSMUSG00000036295|ENSMUSG00000030093|ENSMUSG00000027952|ENSMUSG00000019970|ENSMUSG00000020032|ENSMUSG00000061718|ENSMUSG00000058755|ENSMUSG00000078817|ENSMUSG00000053965|ENSMUSG00000019577|ENSMUSG00000027843|ENSMUSG00000046223|ENSMUSG00000024210|ENSMUSG00000024190|ENSMUSG00000045730|ENSMUSG00000053113|ENSMUSG00000040451|ENSMUSG00000026628|ENSMUSG00000005320|ENSMUSG00000020893|…	http://amigo.geneontology.org/cgi-bin/amigo/term_details?term=GO:0016310
metabolic process	Gene Ontology	GO:0008152	152	8538	1.38592e-06	4.28554e-05	ENSMUSG00000000901|ENSMUSG00000049892|ENSMUSG00000030350|ENSMUSG00000058624|ENSMUSG00000021260|ENSMUSG00000031770|ENSMUSG00000024190|ENSMUSG00000057719|ENSMUSG00000045730|ENSMUSG00000019577|ENSMUSG00000003484|ENSMUSG00000027843|ENSMUSG00000052837|ENSMUSG00000020387|ENSMUSG00000056602|ENSMUSG00000017707|ENSMUSG00000046828|ENSMUSG00000053113|ENSMUSG00000063632|ENSMUSG00000020593|ENSMUSG00000027068|…	http://amigo.geneontology.org/cgi-bin/amigo/term_details?term=GO:0008152
response to biotic stimulus	Gene Ontology	GO:0009607	26	674	1.39276e-06	4.28554e-05	ENSMUSG00000032661|ENSMUSG00000030790|ENSMUSG00000056501|ENSMUSG00000019577|ENSMUSG00000026576|ENSMUSG00000026480|ENSMUSG00000027843|ENSMUSG00000052837|ENSMUSG00000027483|ENSMUSG00000021025|ENSMUSG00000030144|ENSMUSG00000030142|ENSMUSG00000033777|ENSMUSG00000032496|ENSMUSG00000057604|ENSMUSG00000027398|ENSMUSG00000017707|ENSMUSG00000042265|ENSMUSG00000046275|ENSMUSG00000078566|ENSMUSG00000049130|…	http://amigo.geneontology.org/cgi-bin/amigo/term_details?term=GO:0009607
extracellular matrix	Gene Ontology	GO:0031012	20	425	1.41719e-06	4.33578e-05	ENSMUSG00000020053|ENSMUSG00000030093|ENSMUSG00000024529|ENSMUSG00000028128|ENSMUSG00000010797|ENSMUSG00000005124|ENSMUSG00000037016|ENSMUSG00000033453|ENSMUSG00000056071|ENSMUSG00000000901|ENSMUSG00000017737|ENSMUSG00000024053|ENSMUSG00000027656|ENSMUSG00000002289|ENSMUSG00000057604|ENSMUSG00000028776|ENSMUSG00000045672|ENSMUSG00000015568|ENSMUSG00000049001|ENSMUSG00000005800	http://amigo.geneontology.org/cgi-bin/amigo/term_details?term=GO:0031012
positive regulation of apoptotic signaling pathway	Gene Ontology	GO:2001235	12	152	1.45834e-06	4.43634e-05	ENSMUSG00000028211|ENSMUSG00000056054|ENSMUSG00000046223|ENSMUSG00000056071|ENSMUSG00000024521|ENSMUSG00000017737|ENSMUSG00000078566|ENSMUSG00000017707|ENSMUSG00000026628|ENSMUSG00000039304|ENSMUSG00000058755|ENSMUSG00000024778	http://amigo.geneontology.org/cgi-bin/amigo/term_details?term=GO:2001235
ion transport	Gene Ontology	GO:0006811	36	1148	1.50025e-06	4.53804e-05	ENSMUSG00000057123|ENSMUSG00000020432|ENSMUSG00000029321|ENSMUSG00000017707|ENSMUSG00000003153|ENSMUSG00000003484|ENSMUSG00000026576|ENSMUSG00000032204|ENSMUSG00000033998|ENSMUSG00000040907|ENSMUSG00000027483|ENSMUSG00000045730|ENSMUSG00000038178|ENSMUSG00000030495|ENSMUSG00000029802|ENSMUSG00000078532|ENSMUSG00000005320|ENSMUSG00000014813|ENSMUSG00000020893|ENSMUSG00000020053|ENSMUSG00000044026|…	http://amigo.geneontology.org/cgi-bin/amigo/term_details?term=GO:0006811
regulation of endopeptidase activity	Gene Ontology	GO:0052548	14	213	1.52618e-06	4.59054e-05	ENSMUSG00000020053|ENSMUSG00000024066|ENSMUSG00000056054|ENSMUSG00000017737|ENSMUSG00000028128|ENSMUSG00000056071|ENSMUSG00000024521|ENSMUSG00000046223|ENSMUSG00000031770|ENSMUSG00000019851|ENSMUSG00000078817|ENSMUSG00000023034|ENSMUSG00000024778|ENSMUSG00000039304	http://amigo.geneontology.org/cgi-bin/amigo/term_details?term=GO:0052548
negative regulation of macromolecule metabolic process	Gene Ontology	GO:0010605	49	1832	1.546e-06	4.62417e-05	ENSMUSG00000024066|ENSMUSG00000028211|ENSMUSG00000032484|ENSMUSG00000049892|ENSMUSG00000056602|ENSMUSG00000031770|ENSMUSG00000061718|ENSMUSG00000038402|ENSMUSG00000055116|ENSMUSG00000048756|ENSMUSG00000027843|ENSMUSG00000052837|ENSMUSG00000043099|ENSMUSG00000046223|ENSMUSG00000026628|ENSMUSG00000031431|ENSMUSG00000079012|ENSMUSG00000047146|ENSMUSG00000053113|ENSMUSG00000023034|ENSMUSG00000035456|…	http://amigo.geneontology.org/cgi-bin/amigo/term_details?term=GO:0010605
angiogenesis	Gene Ontology	GO:0001525	19	390	1.60678e-06	4.77929e-05	ENSMUSG00000045092|ENSMUSG00000030093|ENSMUSG00000017737|ENSMUSG00000028194|ENSMUSG00000028128|ENSMUSG00000025473|ENSMUSG00000045730|ENSMUSG00000032484|ENSMUSG00000030790|ENSMUSG00000036144|ENSMUSG00000002289|ENSMUSG00000049130|ENSMUSG00000023034|ENSMUSG00000027398|ENSMUSG00000026180|ENSMUSG00000049001|ENSMUSG00000022018|ENSMUSG00000061878|ENSMUSG00000004328	http://amigo.geneontology.org/cgi-bin/amigo/term_details?term=GO:0001525
positive regulation of protein phosphorylation	Gene Ontology	GO:0001934	28	771	1.68072e-06	4.96159e-05	ENSMUSG00000024066|ENSMUSG00000036295|ENSMUSG00000030093|ENSMUSG00000019122|ENSMUSG00000058755|ENSMUSG00000053965|ENSMUSG00000027843|ENSMUSG00000046223|ENSMUSG00000045730|ENSMUSG00000005320|ENSMUSG00000022018|ENSMUSG00000020053|ENSMUSG00000038264|ENSMUSG00000027947|ENSMUSG00000025804|ENSMUSG00000020427|ENSMUSG00000032496|ENSMUSG00000029335|ENSMUSG00000027398|ENSMUSG00000061878|ENSMUSG00000026981|…	http://amigo.geneontology.org/cgi-bin/amigo/term_details?term=GO:0001934
response to lipid	Gene Ontology	GO:0033993	23	552	1.68661e-06	4.96159e-05	ENSMUSG00000030790|ENSMUSG00000029304|ENSMUSG00000056501|ENSMUSG00000055116|ENSMUSG00000019577|ENSMUSG00000027843|ENSMUSG00000052837|ENSMUSG00000023034|ENSMUSG00000021025|ENSMUSG00000020893|ENSMUSG00000020053|ENSMUSG00000026480|ENSMUSG00000024529|ENSMUSG00000032496|ENSMUSG00000027398|ENSMUSG00000026981|ENSMUSG00000029135|ENSMUSG00000019970|ENSMUSG00000044786|ENSMUSG00000019768|ENSMUSG00000020108|…	http://amigo.geneontology.org/cgi-bin/amigo/term_details?term=GO:0033993
negative regulation of transport	Gene Ontology	GO:0051051	20	432	1.7986e-06	5.22411e-05	ENSMUSG00000035828|ENSMUSG00000026981|ENSMUSG00000003484|ENSMUSG00000029802|ENSMUSG00000027843|ENSMUSG00000076431|ENSMUSG00000017737|ENSMUSG00000047250|ENSMUSG00000030474|ENSMUSG00000005824|ENSMUSG00000019768|ENSMUSG00000058755|ENSMUSG00000078817|ENSMUSG00000021025|ENSMUSG00000027398|ENSMUSG00000037922|ENSMUSG00000014813|ENSMUSG00000026073|ENSMUSG00000022018|ENSMUSG00000033685	http://amigo.geneontology.org/cgi-bin/amigo/term_details?term=GO:0051051
response to other organism	Gene Ontology	GO:0051707	25	640	1.80512e-06	5.22411e-05	ENSMUSG00000032661|ENSMUSG00000030790|ENSMUSG00000056501|ENSMUSG00000019577|ENSMUSG00000026576|ENSMUSG00000026480|ENSMUSG00000027843|ENSMUSG00000052837|ENSMUSG00000027483|ENSMUSG00000021025|ENSMUSG00000030144|ENSMUSG00000030142|ENSMUSG00000033777|ENSMUSG00000032496|ENSMUSG00000057604|ENSMUSG00000027398|ENSMUSG00000017707|ENSMUSG00000042265|ENSMUSG00000078566|ENSMUSG00000049130|ENSMUSG00000044786|…	http://amigo.geneontology.org/cgi-bin/amigo/term_details?term=GO:0051707
response to external biotic stimulus	Gene Ontology	GO:0043207	25	640	1.80512e-06	5.22411e-05	ENSMUSG00000032661|ENSMUSG00000030790|ENSMUSG00000056501|ENSMUSG00000019577|ENSMUSG00000026576|ENSMUSG00000026480|ENSMUSG00000027843|ENSMUSG00000052837|ENSMUSG00000027483|ENSMUSG00000021025|ENSMUSG00000030144|ENSMUSG00000030142|ENSMUSG00000033777|ENSMUSG00000032496|ENSMUSG00000057604|ENSMUSG00000027398|ENSMUSG00000017707|ENSMUSG00000042265|ENSMUSG00000078566|ENSMUSG00000049130|ENSMUSG00000044786|…	http://amigo.geneontology.org/cgi-bin/amigo/term_details?term=GO:0043207
positive regulation of leukocyte migration	Gene Ontology	GO:0002687	10	103	1.99478e-06	5.732e-05	ENSMUSG00000005824|ENSMUSG00000025804|ENSMUSG00000025473|ENSMUSG00000017737|ENSMUSG00000026581|ENSMUSG00000023913|ENSMUSG00000049130|ENSMUSG00000021508|ENSMUSG00000027398|ENSMUSG00000026180	http://amigo.geneontology.org/cgi-bin/amigo/term_details?term=GO:0002687
cellular response to oxygen-containing compound	Gene Ontology	GO:1901701	26	688	2.00202e-06	5.732e-05	ENSMUSG00000038332|ENSMUSG00000078566|ENSMUSG00000056501|ENSMUSG00000027398|ENSMUSG00000019577|ENSMUSG00000048756|ENSMUSG00000027843|ENSMUSG00000045613|ENSMUSG00000053113|ENSMUSG00000023034|ENSMUSG00000021025|ENSMUSG00000033685|ENSMUSG00000020593|ENSMUSG00000020053|ENSMUSG00000076431|ENSMUSG00000021250|ENSMUSG00000032496|ENSMUSG00000028893|ENSMUSG00000031765|ENSMUSG00000035828|ENSMUSG00000028211|…	http://amigo.geneontology.org/cgi-bin/amigo/term_details?term=GO:1901701
organic substance metabolic process	Gene Ontology	GO:0071704	146	8162	2.16859e-06	6.17586e-05	ENSMUSG00000000901|ENSMUSG00000049892|ENSMUSG00000030350|ENSMUSG00000058624|ENSMUSG00000021260|ENSMUSG00000031770|ENSMUSG00000024190|ENSMUSG00000045730|ENSMUSG00000019577|ENSMUSG00000003484|ENSMUSG00000027843|ENSMUSG00000052837|ENSMUSG00000020387|ENSMUSG00000056602|ENSMUSG00000017707|ENSMUSG00000053113|ENSMUSG00000063632|ENSMUSG00000020593|ENSMUSG00000027068|ENSMUSG00000027947|ENSMUSG00000010797|…	http://amigo.geneontology.org/cgi-bin/amigo/term_details?term=GO:0071704
protein secretion	Gene Ontology	GO:0009306	20	438	2.19746e-06	6.22497e-05	ENSMUSG00000020053|ENSMUSG00000035828|ENSMUSG00000026981|ENSMUSG00000042265|ENSMUSG00000027843|ENSMUSG00000030142|ENSMUSG00000076431|ENSMUSG00000026473|ENSMUSG00000026073|ENSMUSG00000057123|ENSMUSG00000041794|ENSMUSG00000045502|ENSMUSG00000078817|ENSMUSG00000055116|ENSMUSG00000027398|ENSMUSG00000037922|ENSMUSG00000015568|ENSMUSG00000020848|ENSMUSG00000022018|ENSMUSG00000033685	http://amigo.geneontology.org/cgi-bin/amigo/term_details?term=GO:0009306
regulation of protein secretion	Gene Ontology	GO:0050708	18	362	2.30699e-06	6.48395e-05	ENSMUSG00000020053|ENSMUSG00000035828|ENSMUSG00000057123|ENSMUSG00000027843|ENSMUSG00000030142|ENSMUSG00000076431|ENSMUSG00000026473|ENSMUSG00000026073|ENSMUSG00000041794|ENSMUSG00000045502|ENSMUSG00000078817|ENSMUSG00000055116|ENSMUSG00000027398|ENSMUSG00000037922|ENSMUSG00000015568|ENSMUSG00000020848|ENSMUSG00000022018|ENSMUSG00000033685	http://amigo.geneontology.org/cgi-bin/amigo/term_details?term=GO:0050708
macromolecule modification	Gene Ontology	GO:0043412	69	3020	2.3131e-06	6.48395e-05	ENSMUSG00000024066|ENSMUSG00000036295|ENSMUSG00000035456|ENSMUSG00000033777|ENSMUSG00000030093|ENSMUSG00000030074|ENSMUSG00000039109|ENSMUSG00000019970|ENSMUSG00000056602|ENSMUSG00000020032|ENSMUSG00000024222|ENSMUSG00000031770|ENSMUSG00000061718|ENSMUSG00000058755|ENSMUSG00000078817|ENSMUSG00000027513|ENSMUSG00000053965|ENSMUSG00000025330|ENSMUSG00000019577|ENSMUSG00000030350|ENSMUSG00000030087|…	http://amigo.geneontology.org/cgi-bin/amigo/term_details?term=GO:0043412
chemotaxis	Gene Ontology	GO:0006935	20	440	2.3473e-06	6.54554e-05	ENSMUSG00000045092|ENSMUSG00000031217|ENSMUSG00000056054|ENSMUSG00000005824|ENSMUSG00000042265|ENSMUSG00000048534|ENSMUSG00000025804|ENSMUSG00000056071|ENSMUSG00000001227|ENSMUSG00000026581|ENSMUSG00000023913|ENSMUSG00000049130|ENSMUSG00000021508|ENSMUSG00000023034|ENSMUSG00000019122|ENSMUSG00000025473|ENSMUSG00000029304|ENSMUSG00000027398|ENSMUSG00000028859|ENSMUSG00000026180	http://amigo.geneontology.org/cgi-bin/amigo/term_details?term=GO:0006935
taxis	Gene Ontology	GO:0042330	20	442	2.50637e-06	6.95291e-05	ENSMUSG00000045092|ENSMUSG00000031217|ENSMUSG00000056054|ENSMUSG00000005824|ENSMUSG00000042265|ENSMUSG00000048534|ENSMUSG00000025804|ENSMUSG00000056071|ENSMUSG00000001227|ENSMUSG00000026581|ENSMUSG00000023913|ENSMUSG00000049130|ENSMUSG00000021508|ENSMUSG00000023034|ENSMUSG00000019122|ENSMUSG00000025473|ENSMUSG00000029304|ENSMUSG00000027398|ENSMUSG00000028859|ENSMUSG00000026180	http://amigo.geneontology.org/cgi-bin/amigo/term_details?term=GO:0042330
extracellular region part	Gene Ontology	GO:0044421	71	3151	2.5762e-06	7.10979e-05	ENSMUSG00000020427|ENSMUSG00000024066|ENSMUSG00000032661|ENSMUSG00000067235|ENSMUSG00000020432|ENSMUSG00000030093|ENSMUSG00000027952|ENSMUSG00000039109|ENSMUSG00000032484|ENSMUSG00000073758|ENSMUSG00000030790|ENSMUSG00000058624|ENSMUSG00000029304|ENSMUSG00000005800|ENSMUSG00000058755|ENSMUSG00000015568|ENSMUSG00000024529|ENSMUSG00000033684|ENSMUSG00000037016|ENSMUSG00000005824|ENSMUSG00000026576|…	http://amigo.geneontology.org/cgi-bin/amigo/term_details?term=GO:0044421
receptor binding	Gene Ontology	GO:0005102	38	1279	2.61102e-06	7.16892e-05	ENSMUSG00000045092|ENSMUSG00000067235|ENSMUSG00000030093|ENSMUSG00000030790|ENSMUSG00000029304|ENSMUSG00000019122|ENSMUSG00000058755|ENSMUSG00000055116|ENSMUSG00000015568|ENSMUSG00000005824|ENSMUSG00000040907|ENSMUSG00000046223|ENSMUSG00000045730|ENSMUSG00000023034|ENSMUSG00000066319|ENSMUSG00000014813|ENSMUSG00000039304|ENSMUSG00000020053|ENSMUSG00000038264|ENSMUSG00000027947|ENSMUSG00000010797|…	http://amigo.geneontology.org/cgi-bin/amigo/term_details?term=GO:0005102
positive regulation of MAPK cascade	Gene Ontology	GO:0043410	19	404	2.62952e-06	7.18289e-05	ENSMUSG00000020053|ENSMUSG00000024066|ENSMUSG00000026981|ENSMUSG00000027843|ENSMUSG00000025804|ENSMUSG00000025473|ENSMUSG00000030093|ENSMUSG00000020427|ENSMUSG00000045730|ENSMUSG00000049130|ENSMUSG00000038264|ENSMUSG00000019768|ENSMUSG00000058755|ENSMUSG00000037922|ENSMUSG00000005320|ENSMUSG00000027398|ENSMUSG00000053965|ENSMUSG00000024778|ENSMUSG00000019122	http://amigo.geneontology.org/cgi-bin/amigo/term_details?term=GO:0043410
positive regulation of immune system process	Gene Ontology	GO:0002684	25	657	2.82149e-06	7.65335e-05	ENSMUSG00000048756|ENSMUSG00000086564|ENSMUSG00000005824|ENSMUSG00000027843|ENSMUSG00000021025|ENSMUSG00000022018|ENSMUSG00000020053|ENSMUSG00000038264|ENSMUSG00000025804|ENSMUSG00000033777|ENSMUSG00000021250|ENSMUSG00000026581|ENSMUSG00000031217|ENSMUSG00000032496|ENSMUSG00000045502|ENSMUSG00000027398|ENSMUSG00000026180|ENSMUSG00000023913|ENSMUSG00000003882|ENSMUSG00000017737|ENSMUSG00000023067|…	http://amigo.geneontology.org/cgi-bin/amigo/term_details?term=GO:0002684
cytokine receptor activity	Gene Ontology	GO:0004896	9	83	2.83034e-06	7.65335e-05	ENSMUSG00000027947|ENSMUSG00000025804|ENSMUSG00000003882|ENSMUSG00000028128|ENSMUSG00000026068|ENSMUSG00000071713|ENSMUSG00000028859|ENSMUSG00000026180|ENSMUSG00000026073	http://amigo.geneontology.org/cgi-bin/amigo/term_details?term=GO:0004896
negative regulation of cellular metabolic process	Gene Ontology	GO:0031324	49	1875	2.91331e-06	7.83813e-05	ENSMUSG00000024066|ENSMUSG00000078566|ENSMUSG00000078817|ENSMUSG00000032484|ENSMUSG00000049892|ENSMUSG00000056602|ENSMUSG00000031770|ENSMUSG00000061718|ENSMUSG00000057719|ENSMUSG00000055116|ENSMUSG00000048756|ENSMUSG00000027843|ENSMUSG00000052837|ENSMUSG00000043099|ENSMUSG00000046223|ENSMUSG00000000628|ENSMUSG00000031431|ENSMUSG00000079012|ENSMUSG00000047146|ENSMUSG00000053113|ENSMUSG00000023034|…	http://amigo.geneontology.org/cgi-bin/amigo/term_details?term=GO:0031324
cell adhesion	Gene Ontology	GO:0007155	38	1292	3.285e-06	8.79395e-05	ENSMUSG00000045092|ENSMUSG00000024053|ENSMUSG00000029304|ENSMUSG00000029576|ENSMUSG00000056501|ENSMUSG00000005824|ENSMUSG00000053965|ENSMUSG00000037016|ENSMUSG00000026576|ENSMUSG00000027843|ENSMUSG00000020032|ENSMUSG00000045730|ENSMUSG00000049001|ENSMUSG00000022018|ENSMUSG00000020053|ENSMUSG00000030142|ENSMUSG00000076431|ENSMUSG00000026981|ENSMUSG00000026581|ENSMUSG00000030474|ENSMUSG00000046743|…	http://amigo.geneontology.org/cgi-bin/amigo/term_details?term=GO:0007155
ossification	Gene Ontology	GO:0001503	17	336	3.54223e-06	9.41375e-05	ENSMUSG00000020053|ENSMUSG00000045092|ENSMUSG00000037962|ENSMUSG00000025804|ENSMUSG00000052837|ENSMUSG00000017737|ENSMUSG00000020427|ENSMUSG00000032496|ENSMUSG00000045730|ENSMUSG00000029304|ENSMUSG00000038264|ENSMUSG00000046743|ENSMUSG00000056501|ENSMUSG00000054675|ENSMUSG00000029335|ENSMUSG00000014813|ENSMUSG00000063632	http://amigo.geneontology.org/cgi-bin/amigo/term_details?term=GO:0001503
positive regulation of cell differentiation	Gene Ontology	GO:0045597	29	856	4.06179e-06	0.000107127	ENSMUSG00000048756|ENSMUSG00000030790|ENSMUSG00000086564|ENSMUSG00000056501|ENSMUSG00000055116|ENSMUSG00000015568|ENSMUSG00000053965|ENSMUSG00000005824|ENSMUSG00000052837|ENSMUSG00000020387|ENSMUSG00000053113|ENSMUSG00000049001|ENSMUSG00000022018|ENSMUSG00000020053|ENSMUSG00000038264|ENSMUSG00000010797|ENSMUSG00000025804|ENSMUSG00000021250|ENSMUSG00000020427|ENSMUSG00000032496|ENSMUSG00000027398|…	http://amigo.geneontology.org/cgi-bin/amigo/term_details?term=GO:0045597
cellular response to cytokine stimulus	Gene Ontology	GO:0071345	18	378	4.10027e-06	0.000107612	ENSMUSG00000058818|ENSMUSG00000048756|ENSMUSG00000026981|ENSMUSG00000027947|ENSMUSG00000056501|ENSMUSG00000025804|ENSMUSG00000056749|ENSMUSG00000028128|ENSMUSG00000053113|ENSMUSG00000019122|ENSMUSG00000058755|ENSMUSG00000078817|ENSMUSG00000021025|ENSMUSG00000027398|ENSMUSG00000026073|ENSMUSG00000071713|ENSMUSG00000061878|ENSMUSG00000044786	http://amigo.geneontology.org/cgi-bin/amigo/term_details?term=GO:0071345
positive regulation of phosphorylation	Gene Ontology	GO:0042327	28	810	4.16581e-06	0.000108799	ENSMUSG00000024066|ENSMUSG00000036295|ENSMUSG00000030093|ENSMUSG00000019122|ENSMUSG00000058755|ENSMUSG00000053965|ENSMUSG00000027843|ENSMUSG00000046223|ENSMUSG00000045730|ENSMUSG00000005320|ENSMUSG00000022018|ENSMUSG00000020053|ENSMUSG00000038264|ENSMUSG00000027947|ENSMUSG00000025804|ENSMUSG00000020427|ENSMUSG00000032496|ENSMUSG00000029335|ENSMUSG00000027398|ENSMUSG00000061878|ENSMUSG00000026981|…	http://amigo.geneontology.org/cgi-bin/amigo/term_details?term=GO:0042327
epithelial cell proliferation	Gene Ontology	GO:0050673	17	341	4.2715e-06	0.000110635	ENSMUSG00000020053|ENSMUSG00000024066|ENSMUSG00000010797|ENSMUSG00000048534|ENSMUSG00000030093|ENSMUSG00000026473|ENSMUSG00000028128|ENSMUSG00000020427|ENSMUSG00000028967|ENSMUSG00000049130|ENSMUSG00000044786|ENSMUSG00000023034|ENSMUSG00000019768|ENSMUSG00000021765|ENSMUSG00000063632|ENSMUSG00000022018|ENSMUSG00000056501	http://amigo.geneontology.org/cgi-bin/amigo/term_details?term=GO:0050673
response to organonitrogen compound	Gene Ontology	GO:0010243	21	500	4.27746e-06	0.000110635	ENSMUSG00000020053|ENSMUSG00000038332|ENSMUSG00000056501|ENSMUSG00000028893|ENSMUSG00000027843|ENSMUSG00000052837|ENSMUSG00000019970|ENSMUSG00000026581|ENSMUSG00000079012|ENSMUSG00000027513|ENSMUSG00000049130|ENSMUSG00000053113|ENSMUSG00000023034|ENSMUSG00000061718|ENSMUSG00000007659|ENSMUSG00000021025|ENSMUSG00000027398|ENSMUSG00000066361|ENSMUSG00000020893|ENSMUSG00000020593|ENSMUSG00000019577	http://amigo.geneontology.org/cgi-bin/amigo/term_details?term=GO:0010243
regulation of molecular function	Gene Ontology	GO:0065009	49	1904	4.4019e-06	0.000112791	ENSMUSG00000024066|ENSMUSG00000032661|ENSMUSG00000028128|ENSMUSG00000019970|ENSMUSG00000078817|ENSMUSG00000032484|ENSMUSG00000031770|ENSMUSG00000019122|ENSMUSG00000057719|ENSMUSG00000045730|ENSMUSG00000053965|ENSMUSG00000019851|ENSMUSG00000021886|ENSMUSG00000026576|ENSMUSG00000027843|ENSMUSG00000046223|ENSMUSG00000024190|ENSMUSG00000079012|ENSMUSG00000053113|ENSMUSG00000023034|ENSMUSG00000021025|…	http://amigo.geneontology.org/cgi-bin/amigo/term_details?term=GO:0065009
regulation of fibroblast proliferation	Gene Ontology	GO:0048145	9	88	4.40292e-06	0.000112791	ENSMUSG00000020053|ENSMUSG00000028211|ENSMUSG00000010797|ENSMUSG00000029135|ENSMUSG00000017737|ENSMUSG00000023067|ENSMUSG00000019768|ENSMUSG00000024521|ENSMUSG00000061878	http://amigo.geneontology.org/cgi-bin/amigo/term_details?term=GO:0048145
regulation of leukocyte migration	Gene Ontology	GO:0002685	11	141	4.454e-06	0.000113556	ENSMUSG00000005824|ENSMUSG00000027843|ENSMUSG00000025804|ENSMUSG00000025473|ENSMUSG00000017737|ENSMUSG00000026581|ENSMUSG00000023913|ENSMUSG00000049130|ENSMUSG00000021508|ENSMUSG00000027398|ENSMUSG00000026180	http://amigo.geneontology.org/cgi-bin/amigo/term_details?term=GO:0002685
regulation of muscle system process	Gene Ontology	GO:0090257	12	171	4.57459e-06	0.000116078	ENSMUSG00000020053|ENSMUSG00000057604|ENSMUSG00000057123|ENSMUSG00000026576|ENSMUSG00000005124|ENSMUSG00000045613|ENSMUSG00000047250|ENSMUSG00000045730|ENSMUSG00000028967|ENSMUSG00000014813|ENSMUSG00000053965|ENSMUSG00000061878	http://amigo.geneontology.org/cgi-bin/amigo/term_details?term=GO:0090257
response to nitrogen compound	Gene Ontology	GO:1901698	23	588	4.62298e-06	0.000116752	ENSMUSG00000038332|ENSMUSG00000056501|ENSMUSG00000019577|ENSMUSG00000027843|ENSMUSG00000052837|ENSMUSG00000045613|ENSMUSG00000079012|ENSMUSG00000027513|ENSMUSG00000053113|ENSMUSG00000023034|ENSMUSG00000021025|ENSMUSG00000020893|ENSMUSG00000020593|ENSMUSG00000020053|ENSMUSG00000026581|ENSMUSG00000027398|ENSMUSG00000028893|ENSMUSG00000019970|ENSMUSG00000049130|ENSMUSG00000061718|ENSMUSG00000019768|…	http://amigo.geneontology.org/cgi-bin/amigo/term_details?term=GO:1901698
regulation of hormone levels	Gene Ontology	GO:0010817	19	421	4.64524e-06	0.000116763	ENSMUSG00000020053|ENSMUSG00000035828|ENSMUSG00000026981|ENSMUSG00000045502|ENSMUSG00000076431|ENSMUSG00000026473|ENSMUSG00000020848|ENSMUSG00000030790|ENSMUSG00000047250|ENSMUSG00000019768|ENSMUSG00000055116|ENSMUSG00000028003|ENSMUSG00000041794|ENSMUSG00000058755|ENSMUSG00000005320|ENSMUSG00000027398|ENSMUSG00000027068|ENSMUSG00000063632|ENSMUSG00000033685	http://amigo.geneontology.org/cgi-bin/amigo/term_details?term=GO:0010817
transcription from RNA polymerase II promoter	Gene Ontology	GO:0006366	43	1581	4.90533e-06	0.000122283	ENSMUSG00000045092|ENSMUSG00000030093|ENSMUSG00000024042|ENSMUSG00000056501|ENSMUSG00000058755|ENSMUSG00000038402|ENSMUSG00000055116|ENSMUSG00000038342|ENSMUSG00000027513|ENSMUSG00000048756|ENSMUSG00000052837|ENSMUSG00000043099|ENSMUSG00000031431|ENSMUSG00000045730|ENSMUSG00000047146|ENSMUSG00000023034|ENSMUSG00000037447|ENSMUSG00000021025|ENSMUSG00000042622|ENSMUSG00000063632|ENSMUSG00000020593|…	http://amigo.geneontology.org/cgi-bin/amigo/term_details?term=GO:0006366
positive regulation of phosphate metabolic process	Gene Ontology	GO:0045937	30	913	4.93402e-06	0.000122283	ENSMUSG00000024066|ENSMUSG00000036295|ENSMUSG00000030093|ENSMUSG00000030790|ENSMUSG00000019122|ENSMUSG00000058755|ENSMUSG00000053965|ENSMUSG00000021886|ENSMUSG00000027843|ENSMUSG00000046223|ENSMUSG00000045730|ENSMUSG00000005320|ENSMUSG00000022018|ENSMUSG00000020053|ENSMUSG00000038264|ENSMUSG00000027947|ENSMUSG00000025804|ENSMUSG00000020427|ENSMUSG00000032496|ENSMUSG00000029335|ENSMUSG00000027398|…	http://amigo.geneontology.org/cgi-bin/amigo/term_details?term=GO:0045937
positive regulation of phosphorus metabolic process	Gene Ontology	GO:0010562	30	913	4.93402e-06	0.000122283	ENSMUSG00000024066|ENSMUSG00000036295|ENSMUSG00000030093|ENSMUSG00000030790|ENSMUSG00000019122|ENSMUSG00000058755|ENSMUSG00000053965|ENSMUSG00000021886|ENSMUSG00000027843|ENSMUSG00000046223|ENSMUSG00000045730|ENSMUSG00000005320|ENSMUSG00000022018|ENSMUSG00000020053|ENSMUSG00000038264|ENSMUSG00000027947|ENSMUSG00000025804|ENSMUSG00000020427|ENSMUSG00000032496|ENSMUSG00000029335|ENSMUSG00000027398|…	http://amigo.geneontology.org/cgi-bin/amigo/term_details?term=GO:0010562
positive regulation of nucleobase-containing compound metabolic process	Gene Ontology	GO:0045935	40	1421	4.95617e-06	0.000122283	ENSMUSG00000045092|ENSMUSG00000030093|ENSMUSG00000030790|ENSMUSG00000056501|ENSMUSG00000058755|ENSMUSG00000038402|ENSMUSG00000055116|ENSMUSG00000027513|ENSMUSG00000021886|ENSMUSG00000048756|ENSMUSG00000052837|ENSMUSG00000036144|ENSMUSG00000045730|ENSMUSG00000047146|ENSMUSG00000023034|ENSMUSG00000037447|ENSMUSG00000021025|ENSMUSG00000063632|ENSMUSG00000020593|ENSMUSG00000004328|ENSMUSG00000020053|…	http://amigo.geneontology.org/cgi-bin/amigo/term_details?term=GO:0045935
regulation of transcription from RNA polymerase II promoter	Gene Ontology	GO:0006357	42	1529	5.05507e-06	0.000124151	ENSMUSG00000045092|ENSMUSG00000030093|ENSMUSG00000024042|ENSMUSG00000056501|ENSMUSG00000058755|ENSMUSG00000038402|ENSMUSG00000055116|ENSMUSG00000038342|ENSMUSG00000027513|ENSMUSG00000048756|ENSMUSG00000052837|ENSMUSG00000043099|ENSMUSG00000031431|ENSMUSG00000045730|ENSMUSG00000047146|ENSMUSG00000023034|ENSMUSG00000037447|ENSMUSG00000021025|ENSMUSG00000042622|ENSMUSG00000063632|ENSMUSG00000020593|…	http://amigo.geneontology.org/cgi-bin/amigo/term_details?term=GO:0006357
response to oxygen levels	Gene Ontology	GO:0070482	12	173	5.11565e-06	0.000125065	ENSMUSG00000026576|ENSMUSG00000076431|ENSMUSG00000025473|ENSMUSG00000029135|ENSMUSG00000078566|ENSMUSG00000045730|ENSMUSG00000020108|ENSMUSG00000004328|ENSMUSG00000049001|ENSMUSG00000022018|ENSMUSG00000024778|ENSMUSG00000033685	http://amigo.geneontology.org/cgi-bin/amigo/term_details?term=GO:0070482
neuron apoptotic process	Gene Ontology	GO:0051402	14	238	5.1603e-06	0.000125583	ENSMUSG00000048756|ENSMUSG00000025473|ENSMUSG00000026480|ENSMUSG00000020423|ENSMUSG00000024521|ENSMUSG00000031765|ENSMUSG00000049130|ENSMUSG00000019768|ENSMUSG00000007659|ENSMUSG00000027398|ENSMUSG00000078566|ENSMUSG00000049001|ENSMUSG00000024778|ENSMUSG00000056501	http://amigo.geneontology.org/cgi-bin/amigo/term_details?term=GO:0051402
extracellular region	Gene Ontology	GO:0005576	78	3651	5.18779e-06	0.000125681	ENSMUSG00000020427|ENSMUSG00000024066|ENSMUSG00000032661|ENSMUSG00000067235|ENSMUSG00000020432|ENSMUSG00000030093|ENSMUSG00000021765|ENSMUSG00000027952|ENSMUSG00000039109|ENSMUSG00000032484|ENSMUSG00000073758|ENSMUSG00000030790|ENSMUSG00000000901|ENSMUSG00000058624|ENSMUSG00000029304|ENSMUSG00000021260|ENSMUSG00000005800|ENSMUSG00000058755|ENSMUSG00000005824|ENSMUSG00000015568|ENSMUSG00000024529|…	http://amigo.geneontology.org/cgi-bin/amigo/term_details?term=GO:0005576
fibroblast proliferation	Gene Ontology	GO:0048144	9	90	5.2151e-06	0.000125773	ENSMUSG00000020053|ENSMUSG00000028211|ENSMUSG00000010797|ENSMUSG00000029135|ENSMUSG00000017737|ENSMUSG00000023067|ENSMUSG00000019768|ENSMUSG00000024521|ENSMUSG00000061878	http://amigo.geneontology.org/cgi-bin/amigo/term_details?term=GO:0048144
positive regulation of leukocyte chemotaxis	Gene Ontology	GO:0002690	8	67	5.30603e-06	0.000127231	ENSMUSG00000005824|ENSMUSG00000025804|ENSMUSG00000026581|ENSMUSG00000023913|ENSMUSG00000049130|ENSMUSG00000021508|ENSMUSG00000027398|ENSMUSG00000026180	http://amigo.geneontology.org/cgi-bin/amigo/term_details?term=GO:0002690
regulation of apoptotic signaling pathway	Gene Ontology	GO:2001233	17	347	5.32308e-06	0.000127231	ENSMUSG00000020053|ENSMUSG00000028211|ENSMUSG00000056054|ENSMUSG00000017737|ENSMUSG00000056071|ENSMUSG00000024521|ENSMUSG00000046223|ENSMUSG00000078566|ENSMUSG00000017707|ENSMUSG00000026628|ENSMUSG00000031770|ENSMUSG00000039304|ENSMUSG00000058755|ENSMUSG00000007659|ENSMUSG00000027398|ENSMUSG00000040451|ENSMUSG00000024778	http://amigo.geneontology.org/cgi-bin/amigo/term_details?term=GO:2001233
growth	Gene Ontology	GO:0040007	30	917	5.36056e-06	0.000127558	ENSMUSG00000038332|ENSMUSG00000030093|ENSMUSG00000019970|ENSMUSG00000030790|ENSMUSG00000058755|ENSMUSG00000048756|ENSMUSG00000020387|ENSMUSG00000045730|ENSMUSG00000053113|ENSMUSG00000040451|ENSMUSG00000071713|ENSMUSG00000014813|ENSMUSG00000049001|ENSMUSG00000020053|ENSMUSG00000038264|ENSMUSG00000027947|ENSMUSG00000010797|ENSMUSG00000020427|ENSMUSG00000029335|ENSMUSG00000045672|ENSMUSG00000028893|…	http://amigo.geneontology.org/cgi-bin/amigo/term_details?term=GO:0040007
regulation of cell migration	Gene Ontology	GO:0030334	24	638	5.40263e-06	0.00012799	ENSMUSG00000045092|ENSMUSG00000017737|ENSMUSG00000030093|ENSMUSG00000005824|ENSMUSG00000027843|ENSMUSG00000036144|ENSMUSG00000014813|ENSMUSG00000022018|ENSMUSG00000020053|ENSMUSG00000038264|ENSMUSG00000025804|ENSMUSG00000020427|ENSMUSG00000026581|ENSMUSG00000023913|ENSMUSG00000027398|ENSMUSG00000026180|ENSMUSG00000061878|ENSMUSG00000026981|ENSMUSG00000028211|ENSMUSG00000025473|ENSMUSG00000028128|…	http://amigo.geneontology.org/cgi-bin/amigo/term_details?term=GO:0030334
positive regulation of RNA metabolic process	Gene Ontology	GO:0051254	36	1218	5.47764e-06	0.000129195	ENSMUSG00000045092|ENSMUSG00000030093|ENSMUSG00000056501|ENSMUSG00000058755|ENSMUSG00000038402|ENSMUSG00000055116|ENSMUSG00000027513|ENSMUSG00000048756|ENSMUSG00000052837|ENSMUSG00000036144|ENSMUSG00000045730|ENSMUSG00000047146|ENSMUSG00000023034|ENSMUSG00000037447|ENSMUSG00000021025|ENSMUSG00000063632|ENSMUSG00000020593|ENSMUSG00000004328|ENSMUSG00000020053|ENSMUSG00000010797|ENSMUSG00000024063|…	http://amigo.geneontology.org/cgi-bin/amigo/term_details?term=GO:0051254
positive regulation of gene expression	Gene Ontology	GO:0010628	40	1437	6.41715e-06	0.00015069	ENSMUSG00000045092|ENSMUSG00000030093|ENSMUSG00000028211|ENSMUSG00000056501|ENSMUSG00000058755|ENSMUSG00000038402|ENSMUSG00000055116|ENSMUSG00000027513|ENSMUSG00000048756|ENSMUSG00000027843|ENSMUSG00000052837|ENSMUSG00000046223|ENSMUSG00000036144|ENSMUSG00000045730|ENSMUSG00000047146|ENSMUSG00000023034|ENSMUSG00000037447|ENSMUSG00000021025|ENSMUSG00000040451|ENSMUSG00000063632|ENSMUSG00000020593|…	http://amigo.geneontology.org/cgi-bin/amigo/term_details?term=GO:0010628
signal release	Gene Ontology	GO:0023061	18	394	7.06725e-06	0.000165232	ENSMUSG00000035828|ENSMUSG00000030093|ENSMUSG00000026981|ENSMUSG00000045502|ENSMUSG00000076431|ENSMUSG00000026473|ENSMUSG00000020848|ENSMUSG00000030790|ENSMUSG00000047250|ENSMUSG00000055116|ENSMUSG00000041794|ENSMUSG00000058755|ENSMUSG00000027398|ENSMUSG00000005320|ENSMUSG00000041479|ENSMUSG00000063632|ENSMUSG00000061878|ENSMUSG00000033685	http://amigo.geneontology.org/cgi-bin/amigo/term_details?term=GO:0023061
single-organism catabolic process	Gene Ontology	GO:0044712	23	606	7.41468e-06	0.000172601	ENSMUSG00000024066|ENSMUSG00000000901|ENSMUSG00000058624|ENSMUSG00000031770|ENSMUSG00000005800|ENSMUSG00000015568|ENSMUSG00000053965|ENSMUSG00000003484|ENSMUSG00000026480|ENSMUSG00000045730|ENSMUSG00000020593|ENSMUSG00000025509|ENSMUSG00000020053|ENSMUSG00000028194|ENSMUSG00000023913|ENSMUSG00000045502|ENSMUSG00000027398|ENSMUSG00000028893|ENSMUSG00000032437|ENSMUSG00000017737|ENSMUSG00000000628|…	http://amigo.geneontology.org/cgi-bin/amigo/term_details?term=GO:0044712
organic anion transport	Gene Ontology	GO:0015711	14	248	8.05136e-06	0.00018661	ENSMUSG00000026981|ENSMUSG00000003484|ENSMUSG00000022464|ENSMUSG00000029321|ENSMUSG00000022180|ENSMUSG00000017707|ENSMUSG00000027737|ENSMUSG00000038178|ENSMUSG00000030495|ENSMUSG00000029802|ENSMUSG00000027398|ENSMUSG00000028655|ENSMUSG00000003153|ENSMUSG00000032204	http://amigo.geneontology.org/cgi-bin/amigo/term_details?term=GO:0015711
reactive oxygen species metabolic process	Gene Ontology	GO:0072593	13	214	8.09159e-06	0.000186734	ENSMUSG00000020053|ENSMUSG00000038332|ENSMUSG00000024066|ENSMUSG00000028194|ENSMUSG00000026480|ENSMUSG00000027398|ENSMUSG00000023067|ENSMUSG00000078566|ENSMUSG00000000628|ENSMUSG00000048756|ENSMUSG00000020108|ENSMUSG00000028893|ENSMUSG00000019577	http://amigo.geneontology.org/cgi-bin/amigo/term_details?term=GO:0072593
molecular function regulator	Gene Ontology	GO:0098772	32	1038	8.34856e-06	0.000191838	ENSMUSG00000053199|ENSMUSG00000030093|ENSMUSG00000019970|ENSMUSG00000032484|ENSMUSG00000060063|ENSMUSG00000057719|ENSMUSG00000005824|ENSMUSG00000044456|ENSMUSG00000026576|ENSMUSG00000026358|ENSMUSG00000001768|ENSMUSG00000056602|ENSMUSG00000079012|ENSMUSG00000053113|ENSMUSG00000022018|ENSMUSG00000036661|ENSMUSG00000020053|ENSMUSG00000010797|ENSMUSG00000045094|ENSMUSG00000045730|ENSMUSG00000020427|…	http://amigo.geneontology.org/cgi-bin/amigo/term_details?term=GO:0098772
positive regulation of nitrogen compound metabolic process	Gene Ontology	GO:0051173	41	1508	8.42055e-06	0.000192665	ENSMUSG00000045092|ENSMUSG00000030093|ENSMUSG00000030790|ENSMUSG00000056501|ENSMUSG00000058755|ENSMUSG00000038402|ENSMUSG00000055116|ENSMUSG00000027513|ENSMUSG00000021886|ENSMUSG00000048756|ENSMUSG00000030087|ENSMUSG00000052837|ENSMUSG00000036144|ENSMUSG00000045730|ENSMUSG00000047146|ENSMUSG00000023034|ENSMUSG00000037447|ENSMUSG00000021025|ENSMUSG00000063632|ENSMUSG00000020593|ENSMUSG00000004328|…	http://amigo.geneontology.org/cgi-bin/amigo/term_details?term=GO:0051173
apoptotic mitochondrial changes	Gene Ontology	GO:0008637	9	97	9.14922e-06	0.000208447	ENSMUSG00000020053|ENSMUSG00000017737|ENSMUSG00000024521|ENSMUSG00000046223|ENSMUSG00000078566|ENSMUSG00000000628|ENSMUSG00000039304|ENSMUSG00000007659|ENSMUSG00000024778	http://amigo.geneontology.org/cgi-bin/amigo/term_details?term=GO:0008637
cellular metabolic process	Gene Ontology	GO:0044237	137	7716	9.58776e-06	0.000217512	ENSMUSG00000049892|ENSMUSG00000030350|ENSMUSG00000058624|ENSMUSG00000031770|ENSMUSG00000024190|ENSMUSG00000057719|ENSMUSG00000045730|ENSMUSG00000019577|ENSMUSG00000003484|ENSMUSG00000027843|ENSMUSG00000052837|ENSMUSG00000020387|ENSMUSG00000056602|ENSMUSG00000017707|ENSMUSG00000053113|ENSMUSG00000063632|ENSMUSG00000020593|ENSMUSG00000027068|ENSMUSG00000027947|ENSMUSG00000010797|ENSMUSG00000020423|…	http://amigo.geneontology.org/cgi-bin/amigo/term_details?term=GO:0044237
anion transport	Gene Ontology	GO:0006820	17	364	9.67889e-06	0.000218653	ENSMUSG00000026981|ENSMUSG00000003484|ENSMUSG00000022464|ENSMUSG00000029321|ENSMUSG00000022180|ENSMUSG00000028255|ENSMUSG00000017707|ENSMUSG00000027737|ENSMUSG00000038178|ENSMUSG00000030495|ENSMUSG00000029802|ENSMUSG00000005320|ENSMUSG00000027398|ENSMUSG00000014813|ENSMUSG00000028655|ENSMUSG00000003153|ENSMUSG00000032204	http://amigo.geneontology.org/cgi-bin/amigo/term_details?term=GO:0006820
intrinsic apoptotic signaling pathway	Gene Ontology	GO:0097193	14	253	9.97539e-06	0.000224404	ENSMUSG00000056054|ENSMUSG00000017737|ENSMUSG00000007659|ENSMUSG00000056071|ENSMUSG00000024521|ENSMUSG00000046223|ENSMUSG00000023067|ENSMUSG00000017707|ENSMUSG00000078566|ENSMUSG00000031770|ENSMUSG00000056501|ENSMUSG00000043099|ENSMUSG00000020108|ENSMUSG00000019851	http://amigo.geneontology.org/cgi-bin/amigo/term_details?term=GO:0097193
regulation of vasculature development	Gene Ontology	GO:1901342	13	219	1.02245e-05	0.000229047	ENSMUSG00000024066|ENSMUSG00000017737|ENSMUSG00000028194|ENSMUSG00000028128|ENSMUSG00000032484|ENSMUSG00000030790|ENSMUSG00000036144|ENSMUSG00000045730|ENSMUSG00000049130|ENSMUSG00000027398|ENSMUSG00000026180|ENSMUSG00000022018|ENSMUSG00000061878	http://amigo.geneontology.org/cgi-bin/amigo/term_details?term=GO:1901342
regulation of cytokine production	Gene Ontology	GO:0001817	20	489	1.05299e-05	0.000234905	ENSMUSG00000038264|ENSMUSG00000027947|ENSMUSG00000056501|ENSMUSG00000030142|ENSMUSG00000027843|ENSMUSG00000025473|ENSMUSG00000032496|ENSMUSG00000028967|ENSMUSG00000049130|ENSMUSG00000044786|ENSMUSG00000034641|ENSMUSG00000078817|ENSMUSG00000005320|ENSMUSG00000027398|ENSMUSG00000037922|ENSMUSG00000015568|ENSMUSG00000026073|ENSMUSG00000022018|ENSMUSG00000061878|ENSMUSG00000020893	http://amigo.geneontology.org/cgi-bin/amigo/term_details?term=GO:0001817
carboxylic acid binding	Gene Ontology	GO:0031406	11	156	1.09511e-05	0.000243287	ENSMUSG00000027513|ENSMUSG00000038332|ENSMUSG00000056054|ENSMUSG00000028893|ENSMUSG00000028194|ENSMUSG00000026473|ENSMUSG00000056071|ENSMUSG00000030474|ENSMUSG00000028003|ENSMUSG00000060063|ENSMUSG00000027360	http://amigo.geneontology.org/cgi-bin/amigo/term_details?term=GO:0031406
regulation of proteolysis	Gene Ontology	GO:0030162	21	536	1.18038e-05	0.000261146	ENSMUSG00000020053|ENSMUSG00000024066|ENSMUSG00000056054|ENSMUSG00000046223|ENSMUSG00000078817|ENSMUSG00000027398|ENSMUSG00000028128|ENSMUSG00000056071|ENSMUSG00000024521|ENSMUSG00000032484|ENSMUSG00000079012|ENSMUSG00000017737|ENSMUSG00000031770|ENSMUSG00000019851|ENSMUSG00000025473|ENSMUSG00000005320|ENSMUSG00000023034|ENSMUSG00000066361|ENSMUSG00000026073|ENSMUSG00000024778|ENSMUSG00000039304	http://amigo.geneontology.org/cgi-bin/amigo/term_details?term=GO:0030162
cellular response to endogenous stimulus	Gene Ontology	GO:0071495	28	859	1.19273e-05	0.000262794	ENSMUSG00000029335|ENSMUSG00000038332|ENSMUSG00000042834|ENSMUSG00000024042|ENSMUSG00000056501|ENSMUSG00000055116|ENSMUSG00000019577|ENSMUSG00000027843|ENSMUSG00000052837|ENSMUSG00000053113|ENSMUSG00000023034|ENSMUSG00000005320|ENSMUSG00000020893|ENSMUSG00000020593|ENSMUSG00000020053|ENSMUSG00000026480|ENSMUSG00000021250|ENSMUSG00000046743|ENSMUSG00000027398|ENSMUSG00000044461|ENSMUSG00000028893|…	http://amigo.geneontology.org/cgi-bin/amigo/term_details?term=GO:0071495
regulation of cell motility	Gene Ontology	GO:2000145	24	672	1.24005e-05	0.0002721	ENSMUSG00000045092|ENSMUSG00000017737|ENSMUSG00000030093|ENSMUSG00000005824|ENSMUSG00000027843|ENSMUSG00000036144|ENSMUSG00000014813|ENSMUSG00000022018|ENSMUSG00000020053|ENSMUSG00000038264|ENSMUSG00000025804|ENSMUSG00000020427|ENSMUSG00000026581|ENSMUSG00000023913|ENSMUSG00000027398|ENSMUSG00000026180|ENSMUSG00000061878|ENSMUSG00000026981|ENSMUSG00000028211|ENSMUSG00000025473|ENSMUSG00000028128|…	http://amigo.geneontology.org/cgi-bin/amigo/term_details?term=GO:2000145
proteinaceous extracellular matrix	Gene Ontology	GO:0005578	15	296	1.30631e-05	0.00028547	ENSMUSG00000020053|ENSMUSG00000030093|ENSMUSG00000024529|ENSMUSG00000010797|ENSMUSG00000005124|ENSMUSG00000037016|ENSMUSG00000033453|ENSMUSG00000000901|ENSMUSG00000017737|ENSMUSG00000024053|ENSMUSG00000027656|ENSMUSG00000002289|ENSMUSG00000005800|ENSMUSG00000045672|ENSMUSG00000049001	http://amigo.geneontology.org/cgi-bin/amigo/term_details?term=GO:0005578
locomotion	Gene Ontology	GO:0040011	37	1323	1.33185e-05	0.000289868	ENSMUSG00000045092|ENSMUSG00000028128|ENSMUSG00000030093|ENSMUSG00000029304|ENSMUSG00000019122|ENSMUSG00000078817|ENSMUSG00000005824|ENSMUSG00000042265|ENSMUSG00000027843|ENSMUSG00000036144|ENSMUSG00000023034|ENSMUSG00000005320|ENSMUSG00000014813|ENSMUSG00000049001|ENSMUSG00000022018|ENSMUSG00000020053|ENSMUSG00000038264|ENSMUSG00000025804|ENSMUSG00000026981|ENSMUSG00000026581|ENSMUSG00000020427|…	http://amigo.geneontology.org/cgi-bin/amigo/term_details?term=GO:0040011
cytokine production	Gene Ontology	GO:0001816	21	541	1.34896e-05	0.000292403	ENSMUSG00000042265|ENSMUSG00000038264|ENSMUSG00000027947|ENSMUSG00000056501|ENSMUSG00000030142|ENSMUSG00000027843|ENSMUSG00000025473|ENSMUSG00000032496|ENSMUSG00000028967|ENSMUSG00000049130|ENSMUSG00000044786|ENSMUSG00000034641|ENSMUSG00000078817|ENSMUSG00000005320|ENSMUSG00000027398|ENSMUSG00000037922|ENSMUSG00000015568|ENSMUSG00000026073|ENSMUSG00000022018|ENSMUSG00000061878|ENSMUSG00000020893	http://amigo.geneontology.org/cgi-bin/amigo/term_details?term=GO:0001816
positive regulation of transcription, DNA-templated	Gene Ontology	GO:0045893	34	1169	1.40729e-05	0.000302597	ENSMUSG00000045092|ENSMUSG00000030093|ENSMUSG00000056501|ENSMUSG00000058755|ENSMUSG00000038402|ENSMUSG00000055116|ENSMUSG00000027513|ENSMUSG00000048756|ENSMUSG00000052837|ENSMUSG00000036144|ENSMUSG00000045730|ENSMUSG00000047146|ENSMUSG00000023034|ENSMUSG00000037447|ENSMUSG00000021025|ENSMUSG00000063632|ENSMUSG00000020593|ENSMUSG00000004328|ENSMUSG00000020053|ENSMUSG00000010797|ENSMUSG00000024063|…	http://amigo.geneontology.org/cgi-bin/amigo/term_details?term=GO:0045893
positive regulation of nucleic acid-templated transcription	Gene Ontology	GO:1903508	34	1169	1.40729e-05	0.000302597	ENSMUSG00000045092|ENSMUSG00000030093|ENSMUSG00000056501|ENSMUSG00000058755|ENSMUSG00000038402|ENSMUSG00000055116|ENSMUSG00000027513|ENSMUSG00000048756|ENSMUSG00000052837|ENSMUSG00000036144|ENSMUSG00000045730|ENSMUSG00000047146|ENSMUSG00000023034|ENSMUSG00000037447|ENSMUSG00000021025|ENSMUSG00000063632|ENSMUSG00000020593|ENSMUSG00000004328|ENSMUSG00000020053|ENSMUSG00000010797|ENSMUSG00000024063|…	http://amigo.geneontology.org/cgi-bin/amigo/term_details?term=GO:1903508
positive regulation of cell migration	Gene Ontology	GO:0030335	17	376	1.44479e-05	0.000309417	ENSMUSG00000020053|ENSMUSG00000045092|ENSMUSG00000028128|ENSMUSG00000025804|ENSMUSG00000025473|ENSMUSG00000017737|ENSMUSG00000026581|ENSMUSG00000023913|ENSMUSG00000049130|ENSMUSG00000021508|ENSMUSG00000001227|ENSMUSG00000005824|ENSMUSG00000027398|ENSMUSG00000038264|ENSMUSG00000026180|ENSMUSG00000030093|ENSMUSG00000061878	http://amigo.geneontology.org/cgi-bin/amigo/term_details?term=GO:0030335
regulation of ERK1 and ERK2 cascade	Gene Ontology	GO:0070372	13	227	1.46733e-05	0.000312991	ENSMUSG00000020053|ENSMUSG00000038264|ENSMUSG00000027843|ENSMUSG00000025804|ENSMUSG00000024190|ENSMUSG00000028967|ENSMUSG00000049130|ENSMUSG00000026628|ENSMUSG00000019768|ENSMUSG00000078817|ENSMUSG00000005320|ENSMUSG00000027398|ENSMUSG00000019122	http://amigo.geneontology.org/cgi-bin/amigo/term_details?term=GO:0070372
positive regulation of RNA biosynthetic process	Gene Ontology	GO:1902680	34	1172	1.48145e-05	0.000314749	ENSMUSG00000045092|ENSMUSG00000030093|ENSMUSG00000056501|ENSMUSG00000058755|ENSMUSG00000038402|ENSMUSG00000055116|ENSMUSG00000027513|ENSMUSG00000048756|ENSMUSG00000052837|ENSMUSG00000036144|ENSMUSG00000045730|ENSMUSG00000047146|ENSMUSG00000023034|ENSMUSG00000037447|ENSMUSG00000021025|ENSMUSG00000063632|ENSMUSG00000020593|ENSMUSG00000004328|ENSMUSG00000020053|ENSMUSG00000010797|ENSMUSG00000024063|…	http://amigo.geneontology.org/cgi-bin/amigo/term_details?term=GO:1902680
hormone secretion	Gene Ontology	GO:0046879	15	300	1.51825e-05	0.000321292	ENSMUSG00000035828|ENSMUSG00000026981|ENSMUSG00000045502|ENSMUSG00000076431|ENSMUSG00000026473|ENSMUSG00000020848|ENSMUSG00000030790|ENSMUSG00000047250|ENSMUSG00000055116|ENSMUSG00000041794|ENSMUSG00000058755|ENSMUSG00000005320|ENSMUSG00000027398|ENSMUSG00000063632|ENSMUSG00000033685	http://amigo.geneontology.org/cgi-bin/amigo/term_details?term=GO:0046879
muscle structure development	Gene Ontology	GO:0061061	21	546	1.53898e-05	0.000324397	ENSMUSG00000020053|ENSMUSG00000045092|ENSMUSG00000036144|ENSMUSG00000010797|ENSMUSG00000005124|ENSMUSG00000020423|ENSMUSG00000021250|ENSMUSG00000045730|ENSMUSG00000026628|ENSMUSG00000031431|ENSMUSG00000030790|ENSMUSG00000006642|ENSMUSG00000021508|ENSMUSG00000023034|ENSMUSG00000019122|ENSMUSG00000055116|ENSMUSG00000020427|ENSMUSG00000042622|ENSMUSG00000005824|ENSMUSG00000063632|ENSMUSG00000024042	http://amigo.geneontology.org/cgi-bin/amigo/term_details?term=GO:0061061
negative regulation of establishment of protein localization	Gene Ontology	GO:1904950	12	195	1.59647e-05	0.000335197	ENSMUSG00000035828|ENSMUSG00000027843|ENSMUSG00000076431|ENSMUSG00000078817|ENSMUSG00000007659|ENSMUSG00000021025|ENSMUSG00000027398|ENSMUSG00000037922|ENSMUSG00000005824|ENSMUSG00000026073|ENSMUSG00000022018|ENSMUSG00000033685	http://amigo.geneontology.org/cgi-bin/amigo/term_details?term=GO:1904950
regulation of cellular component movement	Gene Ontology	GO:0051270	25	731	1.65012e-05	0.000344078	ENSMUSG00000045092|ENSMUSG00000057123|ENSMUSG00000017737|ENSMUSG00000030093|ENSMUSG00000005824|ENSMUSG00000027843|ENSMUSG00000036144|ENSMUSG00000014813|ENSMUSG00000022018|ENSMUSG00000020053|ENSMUSG00000038264|ENSMUSG00000025804|ENSMUSG00000020427|ENSMUSG00000026581|ENSMUSG00000023913|ENSMUSG00000027398|ENSMUSG00000026180|ENSMUSG00000061878|ENSMUSG00000026981|ENSMUSG00000028211|ENSMUSG00000025473|…	http://amigo.geneontology.org/cgi-bin/amigo/term_details?term=GO:0051270
positive regulation of chemotaxis	Gene Ontology	GO:0050921	9	105	1.65162e-05	0.000344078	ENSMUSG00000045092|ENSMUSG00000005824|ENSMUSG00000025804|ENSMUSG00000026581|ENSMUSG00000023913|ENSMUSG00000049130|ENSMUSG00000021508|ENSMUSG00000027398|ENSMUSG00000026180	http://amigo.geneontology.org/cgi-bin/amigo/term_details?term=GO:0050921
plasma membrane part	Gene Ontology	GO:0044459	48	1946	1.66392e-05	0.000345296	ENSMUSG00000045092|ENSMUSG00000057123|ENSMUSG00000067235|ENSMUSG00000030351|ENSMUSG00000029321|ENSMUSG00000041794|ENSMUSG00000003153|ENSMUSG00000028967|ENSMUSG00000003484|ENSMUSG00000026576|ENSMUSG00000032204|ENSMUSG00000027843|ENSMUSG00000040907|ENSMUSG00000046223|ENSMUSG00000045730|ENSMUSG00000038178|ENSMUSG00000030495|ENSMUSG00000040451|ENSMUSG00000029802|ENSMUSG00000005320|ENSMUSG00000014813|…	http://amigo.geneontology.org/cgi-bin/amigo/term_details?term=GO:0044459
response to hypoxia	Gene Ontology	GO:0001666	11	164	1.70043e-05	0.00035151	ENSMUSG00000026576|ENSMUSG00000076431|ENSMUSG00000025473|ENSMUSG00000029135|ENSMUSG00000078566|ENSMUSG00000045730|ENSMUSG00000020108|ENSMUSG00000004328|ENSMUSG00000049001|ENSMUSG00000022018|ENSMUSG00000033685	http://amigo.geneontology.org/cgi-bin/amigo/term_details?term=GO:0001666
phosphate-containing compound metabolic process	Gene Ontology	GO:0006796	56	2419	1.79566e-05	0.00036835	ENSMUSG00000019970|ENSMUSG00000024066|ENSMUSG00000036295|ENSMUSG00000030093|ENSMUSG00000027952|ENSMUSG00000078817|ENSMUSG00000064120|ENSMUSG00000030790|ENSMUSG00000020032|ENSMUSG00000061718|ENSMUSG00000058755|ENSMUSG00000057719|ENSMUSG00000053965|ENSMUSG00000019577|ENSMUSG00000021886|ENSMUSG00000026576|ENSMUSG00000027843|ENSMUSG00000046223|ENSMUSG00000024210|ENSMUSG00000017707|ENSMUSG00000045730|…	http://amigo.geneontology.org/cgi-bin/amigo/term_details?term=GO:0006796
regulation of angiogenesis	Gene Ontology	GO:0045765	12	198	1.84256e-05	0.00037653	ENSMUSG00000032484|ENSMUSG00000028194|ENSMUSG00000028128|ENSMUSG00000017737|ENSMUSG00000030790|ENSMUSG00000036144|ENSMUSG00000045730|ENSMUSG00000049130|ENSMUSG00000027398|ENSMUSG00000026180|ENSMUSG00000022018|ENSMUSG00000061878	http://amigo.geneontology.org/cgi-bin/amigo/term_details?term=GO:0045765
phosphorus metabolic process	Gene Ontology	GO:0006793	56	2423	1.88035e-05	0.000382791	ENSMUSG00000019970|ENSMUSG00000024066|ENSMUSG00000036295|ENSMUSG00000030093|ENSMUSG00000027952|ENSMUSG00000078817|ENSMUSG00000064120|ENSMUSG00000030790|ENSMUSG00000020032|ENSMUSG00000061718|ENSMUSG00000058755|ENSMUSG00000057719|ENSMUSG00000053965|ENSMUSG00000019577|ENSMUSG00000021886|ENSMUSG00000026576|ENSMUSG00000027843|ENSMUSG00000046223|ENSMUSG00000024210|ENSMUSG00000017707|ENSMUSG00000045730|…	http://amigo.geneontology.org/cgi-bin/amigo/term_details?term=GO:0006793
hormone transport	Gene Ontology	GO:0009914	15	306	1.89337e-05	0.000383981	ENSMUSG00000035828|ENSMUSG00000026981|ENSMUSG00000045502|ENSMUSG00000076431|ENSMUSG00000026473|ENSMUSG00000020848|ENSMUSG00000030790|ENSMUSG00000047250|ENSMUSG00000055116|ENSMUSG00000041794|ENSMUSG00000058755|ENSMUSG00000005320|ENSMUSG00000027398|ENSMUSG00000063632|ENSMUSG00000033685	http://amigo.geneontology.org/cgi-bin/amigo/term_details?term=GO:0009914
cellular chemical homeostasis	Gene Ontology	GO:0055082	22	599	1.90913e-05	0.000385716	ENSMUSG00000045092|ENSMUSG00000030790|ENSMUSG00000031770|ENSMUSG00000031762|ENSMUSG00000033685|ENSMUSG00000026576|ENSMUSG00000032204|ENSMUSG00000040907|ENSMUSG00000025804|ENSMUSG00000014813|ENSMUSG00000020053|ENSMUSG00000044026|ENSMUSG00000076431|ENSMUSG00000027398|ENSMUSG00000026180|ENSMUSG00000031765|ENSMUSG00000035828|ENSMUSG00000028893|ENSMUSG00000019970|ENSMUSG00000049130|ENSMUSG00000000628|…	http://amigo.geneontology.org/cgi-bin/amigo/term_details?term=GO:0055082
positive regulation of secretion	Gene Ontology	GO:0051047	17	385	1.93003e-05	0.00038702	ENSMUSG00000020053|ENSMUSG00000056054|ENSMUSG00000003484|ENSMUSG00000027843|ENSMUSG00000030142|ENSMUSG00000076431|ENSMUSG00000026473|ENSMUSG00000056071|ENSMUSG00000020848|ENSMUSG00000041794|ENSMUSG00000045502|ENSMUSG00000005320|ENSMUSG00000027398|ENSMUSG00000015568|ENSMUSG00000063632|ENSMUSG00000022018|ENSMUSG00000061878	http://amigo.geneontology.org/cgi-bin/amigo/term_details?term=GO:0051047
lipid metabolic process	Gene Ontology	GO:0006629	31	1033	1.93004e-05	0.00038702	ENSMUSG00000027513|ENSMUSG00000025789|ENSMUSG00000027952|ENSMUSG00000028003|ENSMUSG00000060063|ENSMUSG00000015568|ENSMUSG00000019577|ENSMUSG00000003484|ENSMUSG00000024210|ENSMUSG00000047250|ENSMUSG00000045730|ENSMUSG00000072949|ENSMUSG00000040451|ENSMUSG00000005320|ENSMUSG00000020593|ENSMUSG00000025509|ENSMUSG00000020053|ENSMUSG00000024042|ENSMUSG00000002289|ENSMUSG00000023913|ENSMUSG00000057074|…	http://amigo.geneontology.org/cgi-bin/amigo/term_details?term=GO:0006629
response to decreased oxygen levels	Gene Ontology	GO:0036293	11	167	1.9927e-05	0.000398093	ENSMUSG00000026576|ENSMUSG00000076431|ENSMUSG00000025473|ENSMUSG00000029135|ENSMUSG00000078566|ENSMUSG00000045730|ENSMUSG00000020108|ENSMUSG00000004328|ENSMUSG00000049001|ENSMUSG00000022018|ENSMUSG00000033685	http://amigo.geneontology.org/cgi-bin/amigo/term_details?term=GO:0036293
striated muscle tissue development	Gene Ontology	GO:0014706	16	347	2.05326e-05	0.000407357	ENSMUSG00000020053|ENSMUSG00000045092|ENSMUSG00000057123|ENSMUSG00000010797|ENSMUSG00000005124|ENSMUSG00000020423|ENSMUSG00000021250|ENSMUSG00000031431|ENSMUSG00000045730|ENSMUSG00000026628|ENSMUSG00000023034|ENSMUSG00000036144|ENSMUSG00000055116|ENSMUSG00000042622|ENSMUSG00000063632|ENSMUSG00000024042	http://amigo.geneontology.org/cgi-bin/amigo/term_details?term=GO:0014706
nitrogen compound transport	Gene Ontology	GO:0071705	22	602	2.05428e-05	0.000407357	ENSMUSG00000020432|ENSMUSG00000041794|ENSMUSG00000055116|ENSMUSG00000020848|ENSMUSG00000033685|ENSMUSG00000032204|ENSMUSG00000026473|ENSMUSG00000047250|ENSMUSG00000038178|ENSMUSG00000030495|ENSMUSG00000076431|ENSMUSG00000026981|ENSMUSG00000027398|ENSMUSG00000017707|ENSMUSG00000035828|ENSMUSG00000056054|ENSMUSG00000022464|ENSMUSG00000022180|ENSMUSG00000056071|ENSMUSG00000027737|ENSMUSG00000044786|…	http://amigo.geneontology.org/cgi-bin/amigo/term_details?term=GO:0071705
movement of cell or subcellular component	Gene Ontology	GO:0006928	39	1460	2.10114e-05	0.00041511	ENSMUSG00000045092|ENSMUSG00000057123|ENSMUSG00000028128|ENSMUSG00000030093|ENSMUSG00000029304|ENSMUSG00000041794|ENSMUSG00000078817|ENSMUSG00000005824|ENSMUSG00000042265|ENSMUSG00000027843|ENSMUSG00000036144|ENSMUSG00000023034|ENSMUSG00000005320|ENSMUSG00000014813|ENSMUSG00000049001|ENSMUSG00000022018|ENSMUSG00000020053|ENSMUSG00000038264|ENSMUSG00000025804|ENSMUSG00000026981|ENSMUSG00000026581|…	http://amigo.geneontology.org/cgi-bin/amigo/term_details?term=GO:0006928
negative regulation of secretion	Gene Ontology	GO:0051048	12	201	2.12111e-05	0.000417516	ENSMUSG00000035828|ENSMUSG00000026981|ENSMUSG00000003484|ENSMUSG00000027843|ENSMUSG00000047250|ENSMUSG00000058755|ENSMUSG00000078817|ENSMUSG00000027398|ENSMUSG00000037922|ENSMUSG00000026073|ENSMUSG00000022018|ENSMUSG00000033685	http://amigo.geneontology.org/cgi-bin/amigo/term_details?term=GO:0051048
positive regulation of cell motility	Gene Ontology	GO:2000147	17	390	2.25817e-05	0.000442866	ENSMUSG00000020053|ENSMUSG00000045092|ENSMUSG00000028128|ENSMUSG00000025804|ENSMUSG00000025473|ENSMUSG00000017737|ENSMUSG00000026581|ENSMUSG00000023913|ENSMUSG00000049130|ENSMUSG00000021508|ENSMUSG00000001227|ENSMUSG00000005824|ENSMUSG00000027398|ENSMUSG00000038264|ENSMUSG00000026180|ENSMUSG00000030093|ENSMUSG00000061878	http://amigo.geneontology.org/cgi-bin/amigo/term_details?term=GO:2000147
macromolecule metabolic process	Gene Ontology	GO:0043170	123	6843	2.29805e-05	0.000449043	ENSMUSG00000000901|ENSMUSG00000049892|ENSMUSG00000030350|ENSMUSG00000031770|ENSMUSG00000024190|ENSMUSG00000045730|ENSMUSG00000019577|ENSMUSG00000027843|ENSMUSG00000052837|ENSMUSG00000020387|ENSMUSG00000056602|ENSMUSG00000053113|ENSMUSG00000063632|ENSMUSG00000020593|ENSMUSG00000027947|ENSMUSG00000010797|ENSMUSG00000020423|ENSMUSG00000024042|ENSMUSG00000019851|ENSMUSG00000032496|ENSMUSG00000029335|…	http://amigo.geneontology.org/cgi-bin/amigo/term_details?term=GO:0043170
regulation of leukocyte chemotaxis	Gene Ontology	GO:0002688	8	84	2.42554e-05	0.00047223	ENSMUSG00000005824|ENSMUSG00000025804|ENSMUSG00000026581|ENSMUSG00000023913|ENSMUSG00000049130|ENSMUSG00000021508|ENSMUSG00000027398|ENSMUSG00000026180	http://amigo.geneontology.org/cgi-bin/amigo/term_details?term=GO:0002688
regulation of protein localization	Gene Ontology	GO:0032880	27	848	2.55232e-05	0.000495001	ENSMUSG00000057123|ENSMUSG00000019970|ENSMUSG00000041794|ENSMUSG00000027398|ENSMUSG00000055116|ENSMUSG00000015568|ENSMUSG00000020848|ENSMUSG00000033685|ENSMUSG00000005824|ENSMUSG00000027843|ENSMUSG00000026473|ENSMUSG00000021025|ENSMUSG00000022018|ENSMUSG00000020053|ENSMUSG00000030142|ENSMUSG00000076431|ENSMUSG00000045502|ENSMUSG00000078817|ENSMUSG00000009628|ENSMUSG00000061878|ENSMUSG00000035828|…	http://amigo.geneontology.org/cgi-bin/amigo/term_details?term=GO:0032880
regulation of release of cytochrome c from mitochondria	Gene Ontology	GO:0090199	6	40	2.56099e-05	0.000495001	ENSMUSG00000020053|ENSMUSG00000017737|ENSMUSG00000046223|ENSMUSG00000078566|ENSMUSG00000039304|ENSMUSG00000024778	http://amigo.geneontology.org/cgi-bin/amigo/term_details?term=GO:0090199
sodium ion transport	Gene Ontology	GO:0006814	11	172	2.57679e-05	0.000496265	ENSMUSG00000026576|ENSMUSG00000033998|ENSMUSG00000040907|ENSMUSG00000024042|ENSMUSG00000019970|ENSMUSG00000027483|ENSMUSG00000045730|ENSMUSG00000029321|ENSMUSG00000078532|ENSMUSG00000022464|ENSMUSG00000020893	http://amigo.geneontology.org/cgi-bin/amigo/term_details?term=GO:0006814
ERK1 and ERK2 cascade	Gene Ontology	GO:0070371	13	241	2.6636e-05	0.000510016	ENSMUSG00000020053|ENSMUSG00000038264|ENSMUSG00000027843|ENSMUSG00000025804|ENSMUSG00000024190|ENSMUSG00000028967|ENSMUSG00000049130|ENSMUSG00000026628|ENSMUSG00000019768|ENSMUSG00000078817|ENSMUSG00000005320|ENSMUSG00000027398|ENSMUSG00000019122	http://amigo.geneontology.org/cgi-bin/amigo/term_details?term=GO:0070371
fat cell differentiation	Gene Ontology	GO:0045444	12	206	2.66725e-05	0.000510016	ENSMUSG00000020053|ENSMUSG00000030545|ENSMUSG00000000901|ENSMUSG00000078566|ENSMUSG00000047446|ENSMUSG00000045730|ENSMUSG00000044786|ENSMUSG00000023034|ENSMUSG00000056501|ENSMUSG00000055116|ENSMUSG00000051748|ENSMUSG00000020593	http://amigo.geneontology.org/cgi-bin/amigo/term_details?term=GO:0045444
small molecule biosynthetic process	Gene Ontology	GO:0044283	17	397	2.80084e-05	0.000533655	ENSMUSG00000027513|ENSMUSG00000015568|ENSMUSG00000028893|ENSMUSG00000026473|ENSMUSG00000027952|ENSMUSG00000024042|ENSMUSG00000027875|ENSMUSG00000047250|ENSMUSG00000024210|ENSMUSG00000026628|ENSMUSG00000060063|ENSMUSG00000005320|ENSMUSG00000027398|ENSMUSG00000027068|ENSMUSG00000025330|ENSMUSG00000061878|ENSMUSG00000019577	http://amigo.geneontology.org/cgi-bin/amigo/term_details?term=GO:0044283
regulation of locomotion	Gene Ontology	GO:0040012	24	709	2.86363e-05	0.000543684	ENSMUSG00000045092|ENSMUSG00000017737|ENSMUSG00000030093|ENSMUSG00000005824|ENSMUSG00000027843|ENSMUSG00000036144|ENSMUSG00000014813|ENSMUSG00000022018|ENSMUSG00000020053|ENSMUSG00000038264|ENSMUSG00000025804|ENSMUSG00000020427|ENSMUSG00000026581|ENSMUSG00000023913|ENSMUSG00000027398|ENSMUSG00000026180|ENSMUSG00000061878|ENSMUSG00000026981|ENSMUSG00000028211|ENSMUSG00000025473|ENSMUSG00000028128|…	http://amigo.geneontology.org/cgi-bin/amigo/term_details?term=GO:0040012
cell growth	Gene Ontology	GO:0016049	18	441	2.99279e-05	0.000564419	ENSMUSG00000020053|ENSMUSG00000038332|ENSMUSG00000027656|ENSMUSG00000027947|ENSMUSG00000028893|ENSMUSG00000005124|ENSMUSG00000038264|ENSMUSG00000003882|ENSMUSG00000020387|ENSMUSG00000020427|ENSMUSG00000001227|ENSMUSG00000023067|ENSMUSG00000040451|ENSMUSG00000019768|ENSMUSG00000071713|ENSMUSG00000019970|ENSMUSG00000049001|ENSMUSG00000061878	http://amigo.geneontology.org/cgi-bin/amigo/term_details?term=GO:0016049
cytokine activity	Gene Ontology	GO:0005125	11	175	2.99393e-05	0.000564419	ENSMUSG00000030093|ENSMUSG00000026981|ENSMUSG00000010797|ENSMUSG00000029304|ENSMUSG00000021508|ENSMUSG00000029335|ENSMUSG00000019122|ENSMUSG00000058755|ENSMUSG00000027398|ENSMUSG00000005824|ENSMUSG00000039304	http://amigo.geneontology.org/cgi-bin/amigo/term_details?term=GO:0005125
regulation of hormone secretion	Gene Ontology	GO:0046883	13	244	3.00987e-05	0.000565433	ENSMUSG00000035828|ENSMUSG00000045502|ENSMUSG00000076431|ENSMUSG00000026473|ENSMUSG00000063632|ENSMUSG00000047250|ENSMUSG00000055116|ENSMUSG00000041794|ENSMUSG00000058755|ENSMUSG00000005320|ENSMUSG00000027398|ENSMUSG00000020848|ENSMUSG00000033685	http://amigo.geneontology.org/cgi-bin/amigo/term_details?term=GO:0046883
positive regulation of release of cytochrome c from mitochondria	Gene Ontology	GO:0090200	5	24	3.08004e-05	0.000576592	ENSMUSG00000017737|ENSMUSG00000046223|ENSMUSG00000078566|ENSMUSG00000039304|ENSMUSG00000024778	http://amigo.geneontology.org/cgi-bin/amigo/term_details?term=GO:0090200
regulation of establishment of protein localization	Gene Ontology	GO:0070201	24	713	3.12261e-05	0.000582524	ENSMUSG00000057123|ENSMUSG00000041794|ENSMUSG00000027398|ENSMUSG00000055116|ENSMUSG00000015568|ENSMUSG00000020848|ENSMUSG00000033685|ENSMUSG00000005824|ENSMUSG00000027843|ENSMUSG00000026473|ENSMUSG00000021025|ENSMUSG00000022018|ENSMUSG00000020053|ENSMUSG00000030142|ENSMUSG00000076431|ENSMUSG00000045502|ENSMUSG00000078817|ENSMUSG00000061878|ENSMUSG00000035828|ENSMUSG00000024521|ENSMUSG00000023067|…	http://amigo.geneontology.org/cgi-bin/amigo/term_details?term=GO:0070201
regulation of epithelial cell proliferation	Gene Ontology	GO:0050678	14	282	3.14103e-05	0.000583927	ENSMUSG00000020053|ENSMUSG00000024066|ENSMUSG00000010797|ENSMUSG00000048534|ENSMUSG00000030093|ENSMUSG00000026473|ENSMUSG00000028128|ENSMUSG00000028967|ENSMUSG00000049130|ENSMUSG00000044786|ENSMUSG00000023034|ENSMUSG00000019768|ENSMUSG00000063632|ENSMUSG00000022018	http://amigo.geneontology.org/cgi-bin/amigo/term_details?term=GO:0050678
positive regulation of cellular component movement	Gene Ontology	GO:0051272	17	401	3.16044e-05	0.000585501	ENSMUSG00000020053|ENSMUSG00000045092|ENSMUSG00000028128|ENSMUSG00000025804|ENSMUSG00000025473|ENSMUSG00000017737|ENSMUSG00000026581|ENSMUSG00000023913|ENSMUSG00000049130|ENSMUSG00000021508|ENSMUSG00000001227|ENSMUSG00000005824|ENSMUSG00000027398|ENSMUSG00000038264|ENSMUSG00000026180|ENSMUSG00000030093|ENSMUSG00000061878	http://amigo.geneontology.org/cgi-bin/amigo/term_details?term=GO:0051272
muscle tissue development	Gene Ontology	GO:0060537	16	361	3.24499e-05	0.000599091	ENSMUSG00000020053|ENSMUSG00000045092|ENSMUSG00000057123|ENSMUSG00000010797|ENSMUSG00000005124|ENSMUSG00000020423|ENSMUSG00000021250|ENSMUSG00000031431|ENSMUSG00000045730|ENSMUSG00000026628|ENSMUSG00000023034|ENSMUSG00000036144|ENSMUSG00000055116|ENSMUSG00000042622|ENSMUSG00000063632|ENSMUSG00000024042	http://amigo.geneontology.org/cgi-bin/amigo/term_details?term=GO:0060537
positive regulation of locomotion	Gene Ontology	GO:0040017	17	402	3.2565e-05	0.000599152	ENSMUSG00000020053|ENSMUSG00000045092|ENSMUSG00000028128|ENSMUSG00000025804|ENSMUSG00000025473|ENSMUSG00000017737|ENSMUSG00000026581|ENSMUSG00000023913|ENSMUSG00000049130|ENSMUSG00000021508|ENSMUSG00000001227|ENSMUSG00000005824|ENSMUSG00000027398|ENSMUSG00000038264|ENSMUSG00000026180|ENSMUSG00000030093|ENSMUSG00000061878	http://amigo.geneontology.org/cgi-bin/amigo/term_details?term=GO:0040017
epithelial cell apoptotic process	Gene Ontology	GO:1904019	8	88	3.30599e-05	0.000606173	ENSMUSG00000020053|ENSMUSG00000048756|ENSMUSG00000002289|ENSMUSG00000044786|ENSMUSG00000007659|ENSMUSG00000049001|ENSMUSG00000022018|ENSMUSG00000024778	http://amigo.geneontology.org/cgi-bin/amigo/term_details?term=GO:1904019
regulation of neuron death	Gene Ontology	GO:1901214	14	284	3.3809e-05	0.000617792	ENSMUSG00000020053|ENSMUSG00000048756|ENSMUSG00000025473|ENSMUSG00000027398|ENSMUSG00000026480|ENSMUSG00000020423|ENSMUSG00000024521|ENSMUSG00000049130|ENSMUSG00000019768|ENSMUSG00000007659|ENSMUSG00000020108|ENSMUSG00000049001|ENSMUSG00000031765|ENSMUSG00000056501	http://amigo.geneontology.org/cgi-bin/amigo/term_details?term=GO:1901214
negative regulation of secretion by cell	Gene Ontology	GO:1903531	11	180	3.81904e-05	0.000693213	ENSMUSG00000035828|ENSMUSG00000026981|ENSMUSG00000027843|ENSMUSG00000047250|ENSMUSG00000058755|ENSMUSG00000078817|ENSMUSG00000027398|ENSMUSG00000037922|ENSMUSG00000026073|ENSMUSG00000022018|ENSMUSG00000033685	http://amigo.geneontology.org/cgi-bin/amigo/term_details?term=GO:1903531
muscle organ development	Gene Ontology	GO:0007517	15	328	4.0662e-05	0.000735487	ENSMUSG00000020053|ENSMUSG00000045092|ENSMUSG00000010797|ENSMUSG00000005124|ENSMUSG00000020423|ENSMUSG00000021250|ENSMUSG00000031431|ENSMUSG00000045730|ENSMUSG00000006642|ENSMUSG00000026628|ENSMUSG00000023034|ENSMUSG00000036144|ENSMUSG00000055116|ENSMUSG00000042622|ENSMUSG00000063632	http://amigo.geneontology.org/cgi-bin/amigo/term_details?term=GO:0007517
cytokine-mediated signaling pathway	Gene Ontology	GO:0019221	13	253	4.29565e-05	0.000774374	ENSMUSG00000058818|ENSMUSG00000048756|ENSMUSG00000026981|ENSMUSG00000027947|ENSMUSG00000025804|ENSMUSG00000028128|ENSMUSG00000053113|ENSMUSG00000019122|ENSMUSG00000058755|ENSMUSG00000071713|ENSMUSG00000027398|ENSMUSG00000026073|ENSMUSG00000061878	http://amigo.geneontology.org/cgi-bin/amigo/term_details?term=GO:0019221
response to steroid hormone	Gene Ontology	GO:0048545	12	217	4.31524e-05	0.000775295	ENSMUSG00000020053|ENSMUSG00000026981|ENSMUSG00000019970|ENSMUSG00000024529|ENSMUSG00000029304|ENSMUSG00000044786|ENSMUSG00000023034|ENSMUSG00000019768|ENSMUSG00000055116|ENSMUSG00000020108|ENSMUSG00000020893|ENSMUSG00000024778	http://amigo.geneontology.org/cgi-bin/amigo/term_details?term=GO:0048545
positive regulation of transport	Gene Ontology	GO:0051050	27	877	4.46387e-05	0.000799316	ENSMUSG00000028003|ENSMUSG00000041794|ENSMUSG00000027398|ENSMUSG00000005824|ENSMUSG00000015568|ENSMUSG00000020848|ENSMUSG00000003484|ENSMUSG00000026576|ENSMUSG00000027843|ENSMUSG00000026473|ENSMUSG00000076431|ENSMUSG00000045730|ENSMUSG00000005320|ENSMUSG00000014813|ENSMUSG00000063632|ENSMUSG00000022018|ENSMUSG00000020053|ENSMUSG00000030142|ENSMUSG00000025804|ENSMUSG00000021025|ENSMUSG00000045502|…	http://amigo.geneontology.org/cgi-bin/amigo/term_details?term=GO:0051050
muscle system process	Gene Ontology	GO:0003012	14	292	4.50869e-05	0.000804652	ENSMUSG00000020053|ENSMUSG00000057604|ENSMUSG00000057123|ENSMUSG00000026576|ENSMUSG00000005124|ENSMUSG00000030087|ENSMUSG00000040907|ENSMUSG00000045613|ENSMUSG00000047250|ENSMUSG00000045730|ENSMUSG00000028967|ENSMUSG00000014813|ENSMUSG00000053965|ENSMUSG00000061878	http://amigo.geneontology.org/cgi-bin/amigo/term_details?term=GO:0003012
negative regulation of protein transport	Gene Ontology	GO:0051224	11	185	4.83301e-05	0.000859666	ENSMUSG00000035828|ENSMUSG00000027843|ENSMUSG00000076431|ENSMUSG00000078817|ENSMUSG00000021025|ENSMUSG00000027398|ENSMUSG00000037922|ENSMUSG00000005824|ENSMUSG00000026073|ENSMUSG00000022018|ENSMUSG00000033685	http://amigo.geneontology.org/cgi-bin/amigo/term_details?term=GO:0051224
regulation of neuron apoptotic process	Gene Ontology	GO:0043523	12	220	4.89495e-05	0.000865986	ENSMUSG00000048756|ENSMUSG00000025473|ENSMUSG00000026480|ENSMUSG00000020423|ENSMUSG00000024521|ENSMUSG00000049130|ENSMUSG00000019768|ENSMUSG00000007659|ENSMUSG00000027398|ENSMUSG00000049001|ENSMUSG00000031765|ENSMUSG00000056501	http://amigo.geneontology.org/cgi-bin/amigo/term_details?term=GO:0043523
positive regulation of biosynthetic process	Gene Ontology	GO:0009891	39	1519	4.90089e-05	0.000865986	ENSMUSG00000045092|ENSMUSG00000030093|ENSMUSG00000078817|ENSMUSG00000030790|ENSMUSG00000056501|ENSMUSG00000058755|ENSMUSG00000038402|ENSMUSG00000055116|ENSMUSG00000027513|ENSMUSG00000021886|ENSMUSG00000048756|ENSMUSG00000030087|ENSMUSG00000052837|ENSMUSG00000036144|ENSMUSG00000045730|ENSMUSG00000047146|ENSMUSG00000023034|ENSMUSG00000037447|ENSMUSG00000021025|ENSMUSG00000063632|ENSMUSG00000020593|…	http://amigo.geneontology.org/cgi-bin/amigo/term_details?term=GO:0009891
positive regulation of epithelial cell proliferation	Gene Ontology	GO:0050679	10	153	5.04239e-05	0.000888057	ENSMUSG00000020053|ENSMUSG00000030093|ENSMUSG00000010797|ENSMUSG00000048534|ENSMUSG00000026473|ENSMUSG00000028128|ENSMUSG00000049130|ENSMUSG00000023034|ENSMUSG00000019768|ENSMUSG00000063632	http://amigo.geneontology.org/cgi-bin/amigo/term_details?term=GO:0050679
positive regulation of neutrophil migration	Gene Ontology	GO:1902624	5	27	5.06114e-05	0.000888438	ENSMUSG00000049130|ENSMUSG00000025473|ENSMUSG00000026180|ENSMUSG00000026581|ENSMUSG00000027398	http://amigo.geneontology.org/cgi-bin/amigo/term_details?term=GO:1902624
cellular homeostasis	Gene Ontology	GO:0019725	23	693	5.62682e-05	0.000984509	ENSMUSG00000045092|ENSMUSG00000030790|ENSMUSG00000031770|ENSMUSG00000031762|ENSMUSG00000033684|ENSMUSG00000033685|ENSMUSG00000026576|ENSMUSG00000032204|ENSMUSG00000040907|ENSMUSG00000025804|ENSMUSG00000014813|ENSMUSG00000020053|ENSMUSG00000044026|ENSMUSG00000076431|ENSMUSG00000027398|ENSMUSG00000026180|ENSMUSG00000031765|ENSMUSG00000035828|ENSMUSG00000028893|ENSMUSG00000019970|ENSMUSG00000049130|…	http://amigo.geneontology.org/cgi-bin/amigo/term_details?term=GO:0019725
organic substance transport	Gene Ontology	GO:0071702	49	2108	5.93007e-05	0.00103419	ENSMUSG00000057123|ENSMUSG00000078817|ENSMUSG00000020432|ENSMUSG00000005824|ENSMUSG00000029321|ENSMUSG00000031770|ENSMUSG00000041794|ENSMUSG00000027398|ENSMUSG00000055116|ENSMUSG00000015568|ENSMUSG00000020848|ENSMUSG00000003153|ENSMUSG00000033685|ENSMUSG00000003484|ENSMUSG00000032204|ENSMUSG00000027843|ENSMUSG00000026473|ENSMUSG00000047250|ENSMUSG00000038178|ENSMUSG00000030495|ENSMUSG00000029802|…	http://amigo.geneontology.org/cgi-bin/amigo/term_details?term=GO:0071702
small molecule metabolic process	Gene Ontology	GO:0044281	38	1479	6.08172e-05	0.00105625	ENSMUSG00000024066|ENSMUSG00000027952|ENSMUSG00000064120|ENSMUSG00000030790|ENSMUSG00000058624|ENSMUSG00000029802|ENSMUSG00000028003|ENSMUSG00000060063|ENSMUSG00000015568|ENSMUSG00000053965|ENSMUSG00000025330|ENSMUSG00000019577|ENSMUSG00000021886|ENSMUSG00000003484|ENSMUSG00000026576|ENSMUSG00000028194|ENSMUSG00000026473|ENSMUSG00000024210|ENSMUSG00000047250|ENSMUSG00000045730|ENSMUSG00000027513|…	http://amigo.geneontology.org/cgi-bin/amigo/term_details?term=GO:0044281
regulation of cellular response to stress	Gene Ontology	GO:0080135	18	467	6.09604e-05	0.00105625	ENSMUSG00000024066|ENSMUSG00000048756|ENSMUSG00000026981|ENSMUSG00000027843|ENSMUSG00000030093|ENSMUSG00000043099|ENSMUSG00000024521|ENSMUSG00000020032|ENSMUSG00000017707|ENSMUSG00000045730|ENSMUSG00000026077|ENSMUSG00000000628|ENSMUSG00000031770|ENSMUSG00000007659|ENSMUSG00000055116|ENSMUSG00000027398|ENSMUSG00000020893|ENSMUSG00000009628	http://amigo.geneontology.org/cgi-bin/amigo/term_details?term=GO:0080135
skeletal muscle tissue development	Gene Ontology	GO:0007519	10	157	6.18631e-05	0.00106637	ENSMUSG00000020423|ENSMUSG00000021250|ENSMUSG00000031431|ENSMUSG00000045730|ENSMUSG00000026628|ENSMUSG00000023034|ENSMUSG00000036144|ENSMUSG00000055116|ENSMUSG00000042622|ENSMUSG00000063632	http://amigo.geneontology.org/cgi-bin/amigo/term_details?term=GO:0007519
response to peptide	Gene Ontology	GO:1901652	13	263	6.26288e-05	0.00107473	ENSMUSG00000020053|ENSMUSG00000027513|ENSMUSG00000028893|ENSMUSG00000027843|ENSMUSG00000019970|ENSMUSG00000079012|ENSMUSG00000053113|ENSMUSG00000023034|ENSMUSG00000021025|ENSMUSG00000027398|ENSMUSG00000066361|ENSMUSG00000020593|ENSMUSG00000019577	http://amigo.geneontology.org/cgi-bin/amigo/term_details?term=GO:1901652
skeletal muscle cell differentiation	Gene Ontology	GO:0035914	7	71	6.41613e-05	0.00109751	ENSMUSG00000020423|ENSMUSG00000021250|ENSMUSG00000026628|ENSMUSG00000023034|ENSMUSG00000055116|ENSMUSG00000042622|ENSMUSG00000063632	http://amigo.geneontology.org/cgi-bin/amigo/term_details?term=GO:0035914
positive regulation of cellular biosynthetic process	Gene Ontology	GO:0031328	38	1485	6.60701e-05	0.00112656	ENSMUSG00000045092|ENSMUSG00000030093|ENSMUSG00000030790|ENSMUSG00000056501|ENSMUSG00000058755|ENSMUSG00000038402|ENSMUSG00000055116|ENSMUSG00000027513|ENSMUSG00000021886|ENSMUSG00000048756|ENSMUSG00000030087|ENSMUSG00000052837|ENSMUSG00000036144|ENSMUSG00000045730|ENSMUSG00000047146|ENSMUSG00000023034|ENSMUSG00000037447|ENSMUSG00000021025|ENSMUSG00000063632|ENSMUSG00000020593|ENSMUSG00000004328|…	http://amigo.geneontology.org/cgi-bin/amigo/term_details?term=GO:0031328
positive regulation of macromolecule biosynthetic process	Gene Ontology	GO:0010557	36	1376	6.7587e-05	0.00114876	ENSMUSG00000045092|ENSMUSG00000030093|ENSMUSG00000078817|ENSMUSG00000056501|ENSMUSG00000058755|ENSMUSG00000038402|ENSMUSG00000055116|ENSMUSG00000027513|ENSMUSG00000048756|ENSMUSG00000052837|ENSMUSG00000036144|ENSMUSG00000045730|ENSMUSG00000047146|ENSMUSG00000023034|ENSMUSG00000037447|ENSMUSG00000021025|ENSMUSG00000063632|ENSMUSG00000020593|ENSMUSG00000004328|ENSMUSG00000020053|ENSMUSG00000010797|…	http://amigo.geneontology.org/cgi-bin/amigo/term_details?term=GO:0010557
response to molecule of bacterial origin	Gene Ontology	GO:0002237	12	228	6.78164e-05	0.00114902	ENSMUSG00000026480|ENSMUSG00000027843|ENSMUSG00000052837|ENSMUSG00000030790|ENSMUSG00000032496|ENSMUSG00000049130|ENSMUSG00000044786|ENSMUSG00000056501|ENSMUSG00000021025|ENSMUSG00000027398|ENSMUSG00000051748|ENSMUSG00000024778	http://amigo.geneontology.org/cgi-bin/amigo/term_details?term=GO:0002237
defense response to other organism	Gene Ontology	GO:0098542	17	429	7.0478e-05	0.00119034	ENSMUSG00000030144|ENSMUSG00000032661|ENSMUSG00000026576|ENSMUSG00000030142|ENSMUSG00000027843|ENSMUSG00000033777|ENSMUSG00000078566|ENSMUSG00000030790|ENSMUSG00000027483|ENSMUSG00000042265|ENSMUSG00000057604|ENSMUSG00000049130|ENSMUSG00000056501|ENSMUSG00000020108|ENSMUSG00000017707|ENSMUSG00000032496|ENSMUSG00000019577	http://amigo.geneontology.org/cgi-bin/amigo/term_details?term=GO:0098542
regulation of sodium ion transport	Gene Ontology	GO:0002028	7	73	7.54864e-05	0.00127093	ENSMUSG00000026576|ENSMUSG00000024042|ENSMUSG00000019970|ENSMUSG00000027483|ENSMUSG00000045730|ENSMUSG00000078532|ENSMUSG00000020893	http://amigo.geneontology.org/cgi-bin/amigo/term_details?term=GO:0002028
regulation of system process	Gene Ontology	GO:0044057	17	432	7.64744e-05	0.00128352	ENSMUSG00000020053|ENSMUSG00000057604|ENSMUSG00000057123|ENSMUSG00000026576|ENSMUSG00000005124|ENSMUSG00000045613|ENSMUSG00000030790|ENSMUSG00000047250|ENSMUSG00000045730|ENSMUSG00000028967|ENSMUSG00000029802|ENSMUSG00000045502|ENSMUSG00000005320|ENSMUSG00000027398|ENSMUSG00000014813|ENSMUSG00000053965|ENSMUSG00000061878	http://amigo.geneontology.org/cgi-bin/amigo/term_details?term=GO:0044057
regulation of protein transport	Gene Ontology	GO:0051223	22	660	7.68384e-05	0.0012856	ENSMUSG00000057123|ENSMUSG00000041794|ENSMUSG00000027398|ENSMUSG00000055116|ENSMUSG00000005824|ENSMUSG00000020848|ENSMUSG00000033685|ENSMUSG00000015568|ENSMUSG00000027843|ENSMUSG00000026473|ENSMUSG00000021025|ENSMUSG00000022018|ENSMUSG00000020053|ENSMUSG00000030142|ENSMUSG00000076431|ENSMUSG00000045502|ENSMUSG00000078817|ENSMUSG00000061878|ENSMUSG00000035828|ENSMUSG00000023067|ENSMUSG00000037922|…	http://amigo.geneontology.org/cgi-bin/amigo/term_details?term=GO:0051223
DNA damage response, signal transduction by p53 class mediator	Gene Ontology	GO:0030330	6	50	7.97394e-05	0.00132998	ENSMUSG00000048756|ENSMUSG00000028893|ENSMUSG00000076431|ENSMUSG00000043099|ENSMUSG00000024521|ENSMUSG00000023067	http://amigo.geneontology.org/cgi-bin/amigo/term_details?term=GO:0030330
response to bacterium	Gene Ontology	GO:0009617	16	392	8.25899e-05	0.00137325	ENSMUSG00000030144|ENSMUSG00000030142|ENSMUSG00000027843|ENSMUSG00000052837|ENSMUSG00000026480|ENSMUSG00000030790|ENSMUSG00000027483|ENSMUSG00000049130|ENSMUSG00000044786|ENSMUSG00000056501|ENSMUSG00000021025|ENSMUSG00000027398|ENSMUSG00000051748|ENSMUSG00000032496|ENSMUSG00000024778|ENSMUSG00000042265	http://amigo.geneontology.org/cgi-bin/amigo/term_details?term=GO:0009617
skeletal muscle organ development	Gene Ontology	GO:0060538	10	163	8.31261e-05	0.00137544	ENSMUSG00000020423|ENSMUSG00000021250|ENSMUSG00000031431|ENSMUSG00000045730|ENSMUSG00000026628|ENSMUSG00000023034|ENSMUSG00000036144|ENSMUSG00000055116|ENSMUSG00000042622|ENSMUSG00000063632	http://amigo.geneontology.org/cgi-bin/amigo/term_details?term=GO:0060538
regulation of gene expression	Gene Ontology	GO:0010468	66	3182	8.32353e-05	0.00137544	ENSMUSG00000024066|ENSMUSG00000046223|ENSMUSG00000030093|ENSMUSG00000028211|ENSMUSG00000049892|ENSMUSG00000024042|ENSMUSG00000056501|ENSMUSG00000058755|ENSMUSG00000038402|ENSMUSG00000055116|ENSMUSG00000038342|ENSMUSG00000027513|ENSMUSG00000025330|ENSMUSG00000026576|ENSMUSG00000030087|ENSMUSG00000027843|ENSMUSG00000052837|ENSMUSG00000043099|ENSMUSG00000025804|ENSMUSG00000031431|ENSMUSG00000045730|…	http://amigo.geneontology.org/cgi-bin/amigo/term_details?term=GO:0010468
epithelium development	Gene Ontology	GO:0060429	28	965	8.68023e-05	0.00142997	ENSMUSG00000024066|ENSMUSG00000057123|ENSMUSG00000030093|ENSMUSG00000030790|ENSMUSG00000056501|ENSMUSG00000038402|ENSMUSG00000055116|ENSMUSG00000037016|ENSMUSG00000046223|ENSMUSG00000047250|ENSMUSG00000053113|ENSMUSG00000005320|ENSMUSG00000042622|ENSMUSG00000014813|ENSMUSG00000063632|ENSMUSG00000020053|ENSMUSG00000010797|ENSMUSG00000030087|ENSMUSG00000076431|ENSMUSG00000046743|ENSMUSG00000027398|…	http://amigo.geneontology.org/cgi-bin/amigo/term_details?term=GO:0060429
regulation of chemotaxis	Gene Ontology	GO:0050920	10	164	8.7212e-05	0.00143231	ENSMUSG00000045092|ENSMUSG00000005824|ENSMUSG00000025804|ENSMUSG00000026581|ENSMUSG00000023913|ENSMUSG00000049130|ENSMUSG00000021508|ENSMUSG00000001227|ENSMUSG00000027398|ENSMUSG00000026180	http://amigo.geneontology.org/cgi-bin/amigo/term_details?term=GO:0050920
cellular lipid metabolic process	Gene Ontology	GO:0044255	24	764	8.85688e-05	0.00145015	ENSMUSG00000027952|ENSMUSG00000019768|ENSMUSG00000028003|ENSMUSG00000047250|ENSMUSG00000015568|ENSMUSG00000019577|ENSMUSG00000003484|ENSMUSG00000024210|ENSMUSG00000017707|ENSMUSG00000045730|ENSMUSG00000072949|ENSMUSG00000040451|ENSMUSG00000020593|ENSMUSG00000025509|ENSMUSG00000027513|ENSMUSG00000024042|ENSMUSG00000023913|ENSMUSG00000057074|ENSMUSG00000061878|ENSMUSG00000028893|ENSMUSG00000027875|…	http://amigo.geneontology.org/cgi-bin/amigo/term_details?term=GO:0044255
L-amino acid transport	Gene Ontology	GO:0015807	5	31	9.08602e-05	0.00148313	ENSMUSG00000027737|ENSMUSG00000038178|ENSMUSG00000030495|ENSMUSG00000017707|ENSMUSG00000022180	http://amigo.geneontology.org/cgi-bin/amigo/term_details?term=GO:0015807
positive regulation of proteolysis	Gene Ontology	GO:0045862	12	236	9.26547e-05	0.00150782	ENSMUSG00000024066|ENSMUSG00000056054|ENSMUSG00000056071|ENSMUSG00000024521|ENSMUSG00000028128|ENSMUSG00000031770|ENSMUSG00000019851|ENSMUSG00000025473|ENSMUSG00000005320|ENSMUSG00000027398|ENSMUSG00000024778|ENSMUSG00000039304	http://amigo.geneontology.org/cgi-bin/amigo/term_details?term=GO:0045862
positive regulation of cysteine-type endopeptidase activity	Gene Ontology	GO:2001056	8	103	9.32888e-05	0.00151354	ENSMUSG00000024066|ENSMUSG00000056054|ENSMUSG00000056071|ENSMUSG00000024521|ENSMUSG00000028128|ENSMUSG00000019851|ENSMUSG00000024778|ENSMUSG00000039304	http://amigo.geneontology.org/cgi-bin/amigo/term_details?term=GO:2001056
leukocyte aggregation	Gene Ontology	GO:0070486	16	397	9.51258e-05	0.00153868	ENSMUSG00000020053|ENSMUSG00000030144|ENSMUSG00000056054|ENSMUSG00000025473|ENSMUSG00000030142|ENSMUSG00000048534|ENSMUSG00000076431|ENSMUSG00000003882|ENSMUSG00000031217|ENSMUSG00000056501|ENSMUSG00000056071|ENSMUSG00000005824|ENSMUSG00000027398|ENSMUSG00000027843|ENSMUSG00000053965|ENSMUSG00000024778	http://amigo.geneontology.org/cgi-bin/amigo/term_details?term=GO:0070486
cytoplasm	Gene Ontology	GO:0005737	148	8864	9.57058e-05	0.00154184	ENSMUSG00000049892|ENSMUSG00000030350|ENSMUSG00000031770|ENSMUSG00000024190|ENSMUSG00000019577|ENSMUSG00000003484|ENSMUSG00000027843|ENSMUSG00000040907|ENSMUSG00000001768|ENSMUSG00000056602|ENSMUSG00000042510|ENSMUSG00000053113|ENSMUSG00000040055|ENSMUSG00000063632|ENSMUSG00000020593|ENSMUSG00000027068|ENSMUSG00000010797|ENSMUSG00000037962|ENSMUSG00000024042|ENSMUSG00000019851|ENSMUSG00000032496|…	http://amigo.geneontology.org/cgi-bin/amigo/term_details?term=GO:0005737
regulation of myeloid cell differentiation	Gene Ontology	GO:0045637	10	166	9.58967e-05	0.00154184	ENSMUSG00000048756|ENSMUSG00000025804|ENSMUSG00000025473|ENSMUSG00000021250|ENSMUSG00000086564|ENSMUSG00000044786|ENSMUSG00000056501|ENSMUSG00000021025|ENSMUSG00000028859|ENSMUSG00000024778	http://amigo.geneontology.org/cgi-bin/amigo/term_details?term=GO:0045637
single organismal cell-cell adhesion	Gene Ontology	GO:0016337	21	624	9.82886e-05	0.00157556	ENSMUSG00000020053|ENSMUSG00000030144|ENSMUSG00000056054|ENSMUSG00000025473|ENSMUSG00000030142|ENSMUSG00000048534|ENSMUSG00000076431|ENSMUSG00000003882|ENSMUSG00000019851|ENSMUSG00000026981|ENSMUSG00000045730|ENSMUSG00000031217|ENSMUSG00000005824|ENSMUSG00000056501|ENSMUSG00000056071|ENSMUSG00000027737|ENSMUSG00000027398|ENSMUSG00000027843|ENSMUSG00000053965|ENSMUSG00000022018|ENSMUSG00000024778	http://amigo.geneontology.org/cgi-bin/amigo/term_details?term=GO:0016337
signal transduction by p53 class mediator	Gene Ontology	GO:0072331	8	104	9.93636e-05	0.00158804	ENSMUSG00000048756|ENSMUSG00000028893|ENSMUSG00000076431|ENSMUSG00000043099|ENSMUSG00000024521|ENSMUSG00000023067|ENSMUSG00000020108|ENSMUSG00000019851	http://amigo.geneontology.org/cgi-bin/amigo/term_details?term=GO:0072331
neutral amino acid transmembrane transporter activity	Gene Ontology	GO:0015175	5	32	0.000103963	0.0016566	ENSMUSG00000027737|ENSMUSG00000038178|ENSMUSG00000030495|ENSMUSG00000017707|ENSMUSG00000022180	http://amigo.geneontology.org/cgi-bin/amigo/term_details?term=GO:0015175
single organism cell adhesion	Gene Ontology	GO:0098602	22	676	0.000107283	0.00170443	ENSMUSG00000030144|ENSMUSG00000029576|ENSMUSG00000056501|ENSMUSG00000056071|ENSMUSG00000005824|ENSMUSG00000053965|ENSMUSG00000027843|ENSMUSG00000045730|ENSMUSG00000022018|ENSMUSG00000020053|ENSMUSG00000030142|ENSMUSG00000076431|ENSMUSG00000026981|ENSMUSG00000031217|ENSMUSG00000027398|ENSMUSG00000056054|ENSMUSG00000048534|ENSMUSG00000025473|ENSMUSG00000027737|ENSMUSG00000024778|ENSMUSG00000003882|…	http://amigo.geneontology.org/cgi-bin/amigo/term_details?term=GO:0098602
negative regulation of gene expression	Gene Ontology	GO:0010629	32	1191	0.000109416	0.00173317	ENSMUSG00000024066|ENSMUSG00000049892|ENSMUSG00000056501|ENSMUSG00000038402|ENSMUSG00000055116|ENSMUSG00000048756|ENSMUSG00000027843|ENSMUSG00000052837|ENSMUSG00000043099|ENSMUSG00000031431|ENSMUSG00000047146|ENSMUSG00000044786|ENSMUSG00000005320|ENSMUSG00000063632|ENSMUSG00000020593|ENSMUSG00000020053|ENSMUSG00000027398|ENSMUSG00000025804|ENSMUSG00000020423|ENSMUSG00000024042|ENSMUSG00000057604|…	http://amigo.geneontology.org/cgi-bin/amigo/term_details?term=GO:0010629
epithelial cell differentiation	Gene Ontology	GO:0030855	18	493	0.000117698	0.001857	ENSMUSG00000020053|ENSMUSG00000024066|ENSMUSG00000030087|ENSMUSG00000076431|ENSMUSG00000029135|ENSMUSG00000046223|ENSMUSG00000047250|ENSMUSG00000028967|ENSMUSG00000044786|ENSMUSG00000046743|ENSMUSG00000019768|ENSMUSG00000055116|ENSMUSG00000027398|ENSMUSG00000042622|ENSMUSG00000014813|ENSMUSG00000063632|ENSMUSG00000030093|ENSMUSG00000056501	http://amigo.geneontology.org/cgi-bin/amigo/term_details?term=GO:0030855
enzyme regulator activity	Gene Ontology	GO:0030234	24	779	0.000117927	0.001857	ENSMUSG00000053199|ENSMUSG00000032484|ENSMUSG00000060063|ENSMUSG00000057719|ENSMUSG00000005824|ENSMUSG00000044456|ENSMUSG00000026576|ENSMUSG00000026358|ENSMUSG00000001768|ENSMUSG00000056602|ENSMUSG00000079012|ENSMUSG00000053113|ENSMUSG00000022018|ENSMUSG00000020053|ENSMUSG00000020427|ENSMUSG00000032496|ENSMUSG00000002289|ENSMUSG00000028893|ENSMUSG00000023067|ENSMUSG00000000628|ENSMUSG00000061718|…	http://amigo.geneontology.org/cgi-bin/amigo/term_details?term=GO:0030234
regulation of neutrophil migration	Gene Ontology	GO:1902622	5	33	0.000118469	0.00186006	ENSMUSG00000049130|ENSMUSG00000025473|ENSMUSG00000026180|ENSMUSG00000026581|ENSMUSG00000027398	http://amigo.geneontology.org/cgi-bin/amigo/term_details?term=GO:1902622
positive regulation of defense response	Gene Ontology	GO:0031349	12	244	0.000124952	0.00195611	ENSMUSG00000056054|ENSMUSG00000027843|ENSMUSG00000056071|ENSMUSG00000033777|ENSMUSG00000032496|ENSMUSG00000019122|ENSMUSG00000060063|ENSMUSG00000025473|ENSMUSG00000021025|ENSMUSG00000027398|ENSMUSG00000053965|ENSMUSG00000019768	http://amigo.geneontology.org/cgi-bin/amigo/term_details?term=GO:0031349
positive regulation of endopeptidase activity	Gene Ontology	GO:0010950	8	108	0.000127035	0.00198293	ENSMUSG00000024066|ENSMUSG00000056054|ENSMUSG00000056071|ENSMUSG00000024521|ENSMUSG00000028128|ENSMUSG00000019851|ENSMUSG00000024778|ENSMUSG00000039304	http://amigo.geneontology.org/cgi-bin/amigo/term_details?term=GO:0010950
cellular macromolecule metabolic process	Gene Ontology	GO:0044260	111	6252	0.000131375	0.00204471	ENSMUSG00000049892|ENSMUSG00000030350|ENSMUSG00000031770|ENSMUSG00000024190|ENSMUSG00000045730|ENSMUSG00000019577|ENSMUSG00000027843|ENSMUSG00000052837|ENSMUSG00000020387|ENSMUSG00000056602|ENSMUSG00000053113|ENSMUSG00000063632|ENSMUSG00000020593|ENSMUSG00000027947|ENSMUSG00000010797|ENSMUSG00000020423|ENSMUSG00000024042|ENSMUSG00000019851|ENSMUSG00000032496|ENSMUSG00000029335|ENSMUSG00000027398|…	http://amigo.geneontology.org/cgi-bin/amigo/term_details?term=GO:0044260
nitric oxide mediated signal transduction	Gene Ontology	GO:0007263	4	17	0.000133013	0.00206421	ENSMUSG00000031762|ENSMUSG00000049001|ENSMUSG00000031765|ENSMUSG00000049892	http://amigo.geneontology.org/cgi-bin/amigo/term_details?term=GO:0007263
negative regulation of protein secretion	Gene Ontology	GO:0050709	8	109	0.000134865	0.00208689	ENSMUSG00000035828|ENSMUSG00000027843|ENSMUSG00000078817|ENSMUSG00000027398|ENSMUSG00000037922|ENSMUSG00000026073|ENSMUSG00000022018|ENSMUSG00000033685	http://amigo.geneontology.org/cgi-bin/amigo/term_details?term=GO:0050709
positive regulation of fibroblast proliferation	Gene Ontology	GO:0048146	6	56	0.000141577	0.00218445	ENSMUSG00000020053|ENSMUSG00000010797|ENSMUSG00000029135|ENSMUSG00000023067|ENSMUSG00000019768|ENSMUSG00000061878	http://amigo.geneontology.org/cgi-bin/amigo/term_details?term=GO:0048146
negative regulation of cell proliferation	Gene Ontology	GO:0008285	19	547	0.000142594	0.00219381	ENSMUSG00000020053|ENSMUSG00000024066|ENSMUSG00000027656|ENSMUSG00000028211|ENSMUSG00000053965|ENSMUSG00000076431|ENSMUSG00000020423|ENSMUSG00000024521|ENSMUSG00000017737|ENSMUSG00000023067|ENSMUSG00000030790|ENSMUSG00000020427|ENSMUSG00000040055|ENSMUSG00000019768|ENSMUSG00000058755|ENSMUSG00000027398|ENSMUSG00000063632|ENSMUSG00000022018|ENSMUSG00000056501	http://amigo.geneontology.org/cgi-bin/amigo/term_details?term=GO:0008285
positive regulation of molecular function	Gene Ontology	GO:0044093	30	1102	0.00014494	0.00221717	ENSMUSG00000024066|ENSMUSG00000028128|ENSMUSG00000019970|ENSMUSG00000031770|ENSMUSG00000019122|ENSMUSG00000053965|ENSMUSG00000019851|ENSMUSG00000021886|ENSMUSG00000026576|ENSMUSG00000026358|ENSMUSG00000046223|ENSMUSG00000045730|ENSMUSG00000005320|ENSMUSG00000022018|ENSMUSG00000039304|ENSMUSG00000020053|ENSMUSG00000010797|ENSMUSG00000026981|ENSMUSG00000032496|ENSMUSG00000027398|ENSMUSG00000061878|…	http://amigo.geneontology.org/cgi-bin/amigo/term_details?term=GO:0044093
response to lipopolysaccharide	Gene Ontology	GO:0032496	11	212	0.000152723	0.00232957	ENSMUSG00000026480|ENSMUSG00000027843|ENSMUSG00000052837|ENSMUSG00000030790|ENSMUSG00000032496|ENSMUSG00000044786|ENSMUSG00000056501|ENSMUSG00000021025|ENSMUSG00000027398|ENSMUSG00000051748|ENSMUSG00000024778	http://amigo.geneontology.org/cgi-bin/amigo/term_details?term=GO:0032496
reproductive structure development	Gene Ontology	GO:0048608	15	372	0.000155843	0.0023704	ENSMUSG00000020053|ENSMUSG00000048756|ENSMUSG00000010797|ENSMUSG00000007659|ENSMUSG00000052837|ENSMUSG00000046223|ENSMUSG00000030790|ENSMUSG00000053113|ENSMUSG00000019768|ENSMUSG00000038402|ENSMUSG00000060445|ENSMUSG00000021765|ENSMUSG00000030093|ENSMUSG00000009628|ENSMUSG00000056501	http://amigo.geneontology.org/cgi-bin/amigo/term_details?term=GO:0048608
negative regulation of protein modification process	Gene Ontology	GO:0031400	17	460	0.000158004	0.00239646	ENSMUSG00000020053|ENSMUSG00000024066|ENSMUSG00000030087|ENSMUSG00000027843|ENSMUSG00000076431|ENSMUSG00000078817|ENSMUSG00000023067|ENSMUSG00000056602|ENSMUSG00000024190|ENSMUSG00000020427|ENSMUSG00000028967|ENSMUSG00000026628|ENSMUSG00000053113|ENSMUSG00000061718|ENSMUSG00000027398|ENSMUSG00000020108|ENSMUSG00000020893	http://amigo.geneontology.org/cgi-bin/amigo/term_details?term=GO:0031400
cell-cell signaling	Gene Ontology	GO:0007267	30	1108	0.000158817	0.00240199	ENSMUSG00000030093|ENSMUSG00000057123|ENSMUSG00000045613|ENSMUSG00000030790|ENSMUSG00000041794|ENSMUSG00000058755|ENSMUSG00000055116|ENSMUSG00000020848|ENSMUSG00000033685|ENSMUSG00000026473|ENSMUSG00000043099|ENSMUSG00000076431|ENSMUSG00000047250|ENSMUSG00000045730|ENSMUSG00000005320|ENSMUSG00000041479|ENSMUSG00000063632|ENSMUSG00000048756|ENSMUSG00000010797|ENSMUSG00000025804|ENSMUSG00000027656|…	http://amigo.geneontology.org/cgi-bin/amigo/term_details?term=GO:0007267
positive regulation of angiogenesis	Gene Ontology	GO:0045766	8	112	0.000160778	0.002418	ENSMUSG00000028128|ENSMUSG00000028194|ENSMUSG00000017737|ENSMUSG00000030790|ENSMUSG00000049130|ENSMUSG00000027398|ENSMUSG00000026180|ENSMUSG00000061878	http://amigo.geneontology.org/cgi-bin/amigo/term_details?term=GO:0045766
positive regulation of peptidase activity	Gene Ontology	GO:0010952	8	112	0.000160778	0.002418	ENSMUSG00000024066|ENSMUSG00000056054|ENSMUSG00000056071|ENSMUSG00000024521|ENSMUSG00000028128|ENSMUSG00000019851|ENSMUSG00000024778|ENSMUSG00000039304	http://amigo.geneontology.org/cgi-bin/amigo/term_details?term=GO:0010952
reproductive system development	Gene Ontology	GO:0061458	15	375	0.000169454	0.00253423	ENSMUSG00000020053|ENSMUSG00000048756|ENSMUSG00000010797|ENSMUSG00000007659|ENSMUSG00000052837|ENSMUSG00000046223|ENSMUSG00000030790|ENSMUSG00000053113|ENSMUSG00000019768|ENSMUSG00000038402|ENSMUSG00000060445|ENSMUSG00000021765|ENSMUSG00000030093|ENSMUSG00000009628|ENSMUSG00000056501	http://amigo.geneontology.org/cgi-bin/amigo/term_details?term=GO:0061458
cell activation	Gene Ontology	GO:0001775	23	750	0.000174432	0.00260141	ENSMUSG00000058818|ENSMUSG00000030093|ENSMUSG00000056501|ENSMUSG00000030144|ENSMUSG00000005824|ENSMUSG00000053965|ENSMUSG00000027843|ENSMUSG00000045730|ENSMUSG00000063632|ENSMUSG00000022018|ENSMUSG00000020053|ENSMUSG00000030142|ENSMUSG00000076431|ENSMUSG00000031217|ENSMUSG00000027398|ENSMUSG00000026180|ENSMUSG00000048534|ENSMUSG00000003882|ENSMUSG00000023067|ENSMUSG00000027737|ENSMUSG00000025473|…	http://amigo.geneontology.org/cgi-bin/amigo/term_details?term=GO:0001775
triglyceride metabolic process	Gene Ontology	GO:0006641	7	85	0.00018268	0.00271686	ENSMUSG00000027513|ENSMUSG00000024042|ENSMUSG00000057074|ENSMUSG00000019768|ENSMUSG00000015568|ENSMUSG00000020593|ENSMUSG00000025509	http://amigo.geneontology.org/cgi-bin/amigo/term_details?term=GO:0006641
single-organism biosynthetic process	Gene Ontology	GO:0044711	28	1011	0.000184566	0.0027373	ENSMUSG00000027513|ENSMUSG00000027952|ENSMUSG00000064120|ENSMUSG00000030790|ENSMUSG00000060063|ENSMUSG00000015568|ENSMUSG00000025330|ENSMUSG00000019577|ENSMUSG00000021886|ENSMUSG00000026473|ENSMUSG00000024210|ENSMUSG00000047250|ENSMUSG00000045730|ENSMUSG00000040451|ENSMUSG00000005686|ENSMUSG00000005320|ENSMUSG00000022018|ENSMUSG00000027068|ENSMUSG00000020053|ENSMUSG00000024042|ENSMUSG00000027398|…	http://amigo.geneontology.org/cgi-bin/amigo/term_details?term=GO:0044711
leukocyte cell-cell adhesion	Gene Ontology	GO:0007159	16	422	0.000186148	0.00275314	ENSMUSG00000020053|ENSMUSG00000030144|ENSMUSG00000056054|ENSMUSG00000025473|ENSMUSG00000030142|ENSMUSG00000048534|ENSMUSG00000076431|ENSMUSG00000003882|ENSMUSG00000031217|ENSMUSG00000056501|ENSMUSG00000056071|ENSMUSG00000005824|ENSMUSG00000027398|ENSMUSG00000027843|ENSMUSG00000053965|ENSMUSG00000024778	http://amigo.geneontology.org/cgi-bin/amigo/term_details?term=GO:0007159
regulation of nucleobase-containing compound metabolic process	Gene Ontology	GO:0019219	62	3018	0.000187058	0.00275864	ENSMUSG00000045092|ENSMUSG00000032661|ENSMUSG00000030093|ENSMUSG00000028211|ENSMUSG00000049892|ENSMUSG00000030790|ENSMUSG00000056501|ENSMUSG00000058755|ENSMUSG00000038402|ENSMUSG00000055116|ENSMUSG00000038342|ENSMUSG00000027513|ENSMUSG00000053965|ENSMUSG00000025330|ENSMUSG00000021886|ENSMUSG00000048756|ENSMUSG00000052837|ENSMUSG00000043099|ENSMUSG00000031431|ENSMUSG00000045730|ENSMUSG00000047146|…	http://amigo.geneontology.org/cgi-bin/amigo/term_details?term=GO:0019219
response to metal ion	Gene Ontology	GO:0010038	10	181	0.00018755	0.00275864	ENSMUSG00000024066|ENSMUSG00000032204|ENSMUSG00000052837|ENSMUSG00000078566|ENSMUSG00000021250|ENSMUSG00000027015|ENSMUSG00000031765|ENSMUSG00000060063|ENSMUSG00000031762|ENSMUSG00000024778	http://amigo.geneontology.org/cgi-bin/amigo/term_details?term=GO:0010038
carboxylic acid transport	Gene Ontology	GO:0046942	11	218	0.000192449	0.00282293	ENSMUSG00000026981|ENSMUSG00000003484|ENSMUSG00000022464|ENSMUSG00000032204|ENSMUSG00000022180|ENSMUSG00000017707|ENSMUSG00000027737|ENSMUSG00000038178|ENSMUSG00000030495|ENSMUSG00000027398|ENSMUSG00000028655	http://amigo.geneontology.org/cgi-bin/amigo/term_details?term=GO:0046942
positive regulation of protein secretion	Gene Ontology	GO:0050714	11	219	0.000199854	0.00292355	ENSMUSG00000020053|ENSMUSG00000030142|ENSMUSG00000027843|ENSMUSG00000076431|ENSMUSG00000026473|ENSMUSG00000041794|ENSMUSG00000045502|ENSMUSG00000027398|ENSMUSG00000015568|ENSMUSG00000020848|ENSMUSG00000022018	http://amigo.geneontology.org/cgi-bin/amigo/term_details?term=GO:0050714
negative regulation of molecular function	Gene Ontology	GO:0044092	24	809	0.000203793	0.00297304	ENSMUSG00000032484|ENSMUSG00000031770|ENSMUSG00000078817|ENSMUSG00000045730|ENSMUSG00000027843|ENSMUSG00000046223|ENSMUSG00000024190|ENSMUSG00000079012|ENSMUSG00000053113|ENSMUSG00000023034|ENSMUSG00000021025|ENSMUSG00000063632|ENSMUSG00000020053|ENSMUSG00000024042|ENSMUSG00000032496|ENSMUSG00000002289|ENSMUSG00000057719|ENSMUSG00000027398|ENSMUSG00000017737|ENSMUSG00000023067|ENSMUSG00000028967|…	http://amigo.geneontology.org/cgi-bin/amigo/term_details?term=GO:0044092
multi-organism process	Gene Ontology	GO:0051704	37	1515	0.000206016	0.00299731	ENSMUSG00000030144|ENSMUSG00000032661|ENSMUSG00000030790|ENSMUSG00000056501|ENSMUSG00000055116|ENSMUSG00000053965|ENSMUSG00000019577|ENSMUSG00000026576|ENSMUSG00000026480|ENSMUSG00000027843|ENSMUSG00000052837|ENSMUSG00000027483|ENSMUSG00000061718|ENSMUSG00000029802|ENSMUSG00000054675|ENSMUSG00000021025|ENSMUSG00000020053|ENSMUSG00000030142|ENSMUSG00000033777|ENSMUSG00000032496|ENSMUSG00000057604|…	http://amigo.geneontology.org/cgi-bin/amigo/term_details?term=GO:0051704
G-protein coupled receptor binding	Gene Ontology	GO:0001664	11	220	0.000207499	0.00301071	ENSMUSG00000045092|ENSMUSG00000030093|ENSMUSG00000010797|ENSMUSG00000040907|ENSMUSG00000030790|ENSMUSG00000045730|ENSMUSG00000021508|ENSMUSG00000061718|ENSMUSG00000019768|ENSMUSG00000066319|ENSMUSG00000019122	http://amigo.geneontology.org/cgi-bin/amigo/term_details?term=GO:0001664
negative regulation of multicellular organismal process	Gene Ontology	GO:0051241	27	967	0.000212444	0.00306583	ENSMUSG00000024066|ENSMUSG00000057123|ENSMUSG00000030093|ENSMUSG00000032484|ENSMUSG00000030790|ENSMUSG00000036144|ENSMUSG00000027398|ENSMUSG00000053965|ENSMUSG00000048756|ENSMUSG00000027843|ENSMUSG00000031431|ENSMUSG00000045730|ENSMUSG00000029802|ENSMUSG00000005320|ENSMUSG00000014813|ENSMUSG00000063632|ENSMUSG00000022018|ENSMUSG00000020053|ENSMUSG00000037962|ENSMUSG00000025804|ENSMUSG00000021025|…	http://amigo.geneontology.org/cgi-bin/amigo/term_details?term=GO:0051241
regulation of NF-kappaB import into nucleus	Gene Ontology	GO:0042345	5	38	0.00021562	0.00309499	ENSMUSG00000021025|ENSMUSG00000027398|ENSMUSG00000005824|ENSMUSG00000061878|ENSMUSG00000078817	http://amigo.geneontology.org/cgi-bin/amigo/term_details?term=GO:0042345
NF-kappaB import into nucleus	Gene Ontology	GO:0042348	5	38	0.00021562	0.00309499	ENSMUSG00000021025|ENSMUSG00000027398|ENSMUSG00000005824|ENSMUSG00000061878|ENSMUSG00000078817	http://amigo.geneontology.org/cgi-bin/amigo/term_details?term=GO:0042348
bone resorption	Gene Ontology	GO:0045453	6	61	0.00021786	0.00311878	ENSMUSG00000024066|ENSMUSG00000045092|ENSMUSG00000025473|ENSMUSG00000045730|ENSMUSG00000029304|ENSMUSG00000019577	http://amigo.geneontology.org/cgi-bin/amigo/term_details?term=GO:0045453
regulation of nitrogen compound metabolic process	Gene Ontology	GO:0051171	65	3227	0.000218946	0.00312597	ENSMUSG00000045092|ENSMUSG00000032661|ENSMUSG00000030093|ENSMUSG00000028211|ENSMUSG00000049892|ENSMUSG00000030790|ENSMUSG00000056501|ENSMUSG00000058755|ENSMUSG00000038402|ENSMUSG00000055116|ENSMUSG00000038342|ENSMUSG00000027513|ENSMUSG00000053965|ENSMUSG00000025330|ENSMUSG00000021886|ENSMUSG00000048756|ENSMUSG00000030087|ENSMUSG00000052837|ENSMUSG00000043099|ENSMUSG00000031431|ENSMUSG00000045730|…	http://amigo.geneontology.org/cgi-bin/amigo/term_details?term=GO:0051171
apical part of cell	Gene Ontology	GO:0045177	14	342	0.000221588	0.00315527	ENSMUSG00000027947|ENSMUSG00000026576|ENSMUSG00000029802|ENSMUSG00000033998|ENSMUSG00000045730|ENSMUSG00000029304|ENSMUSG00000049130|ENSMUSG00000003484|ENSMUSG00000046743|ENSMUSG00000041794|ENSMUSG00000040055|ENSMUSG00000014813|ENSMUSG00000024778|ENSMUSG00000047330	http://amigo.geneontology.org/cgi-bin/amigo/term_details?term=GO:0045177
organic cyclic compound biosynthetic process	Gene Ontology	GO:1901362	64	3165	0.000222691	0.00316256	ENSMUSG00000045092|ENSMUSG00000030093|ENSMUSG00000027952|ENSMUSG00000028211|ENSMUSG00000064120|ENSMUSG00000049892|ENSMUSG00000030790|ENSMUSG00000061718|ENSMUSG00000058755|ENSMUSG00000038402|ENSMUSG00000055116|ENSMUSG00000038342|ENSMUSG00000027513|ENSMUSG00000025330|ENSMUSG00000026077|ENSMUSG00000021886|ENSMUSG00000048756|ENSMUSG00000052837|ENSMUSG00000043099|ENSMUSG00000031431|ENSMUSG00000045730|…	http://amigo.geneontology.org/cgi-bin/amigo/term_details?term=GO:1901362
positive regulation of NF-kappaB import into nucleus	Gene Ontology	GO:0042346	4	20	0.000229112	0.00324514	ENSMUSG00000027398|ENSMUSG00000005824|ENSMUSG00000061878|ENSMUSG00000078817	http://amigo.geneontology.org/cgi-bin/amigo/term_details?term=GO:0042346
neutrophil extravasation	Gene Ontology	GO:0072672	3	7	0.000233607	0.00330008	ENSMUSG00000025473|ENSMUSG00000042265|ENSMUSG00000048534	http://amigo.geneontology.org/cgi-bin/amigo/term_details?term=GO:0072672
osteoblast differentiation	Gene Ontology	GO:0001649	10	187	0.000240728	0.00338298	ENSMUSG00000020053|ENSMUSG00000038264|ENSMUSG00000052837|ENSMUSG00000020427|ENSMUSG00000032496|ENSMUSG00000029304|ENSMUSG00000029335|ENSMUSG00000056501|ENSMUSG00000054675|ENSMUSG00000063632	http://amigo.geneontology.org/cgi-bin/amigo/term_details?term=GO:0001649
receptor activity	Gene Ontology	GO:0004872	29	1082	0.00024137	0.00338298	ENSMUSG00000039167|ENSMUSG00000045613|ENSMUSG00000021260|ENSMUSG00000021886|ENSMUSG00000008845|ENSMUSG00000033998|ENSMUSG00000046223|ENSMUSG00000045730|ENSMUSG00000026068|ENSMUSG00000023034|ENSMUSG00000005320|ENSMUSG00000071713|ENSMUSG00000045092|ENSMUSG00000027947|ENSMUSG00000030142|ENSMUSG00000025804|ENSMUSG00000047875|ENSMUSG00000030474|ENSMUSG00000045502|ENSMUSG00000026180|ENSMUSG00000028776|…	http://amigo.geneontology.org/cgi-bin/amigo/term_details?term=GO:0004872
molecular transducer activity	Gene Ontology	GO:0060089	29	1082	0.00024137	0.00338298	ENSMUSG00000039167|ENSMUSG00000045613|ENSMUSG00000021260|ENSMUSG00000021886|ENSMUSG00000008845|ENSMUSG00000033998|ENSMUSG00000046223|ENSMUSG00000045730|ENSMUSG00000026068|ENSMUSG00000023034|ENSMUSG00000005320|ENSMUSG00000071713|ENSMUSG00000045092|ENSMUSG00000027947|ENSMUSG00000030142|ENSMUSG00000025804|ENSMUSG00000047875|ENSMUSG00000030474|ENSMUSG00000045502|ENSMUSG00000026180|ENSMUSG00000028776|…	http://amigo.geneontology.org/cgi-bin/amigo/term_details?term=GO:0060089
positive regulation of hydrolase activity	Gene Ontology	GO:0051345	15	389	0.000247508	0.00345994	ENSMUSG00000024066|ENSMUSG00000045092|ENSMUSG00000056054|ENSMUSG00000026576|ENSMUSG00000026358|ENSMUSG00000021886|ENSMUSG00000056071|ENSMUSG00000024521|ENSMUSG00000028128|ENSMUSG00000019851|ENSMUSG00000045730|ENSMUSG00000019768|ENSMUSG00000039304|ENSMUSG00000024778|ENSMUSG00000019122	http://amigo.geneontology.org/cgi-bin/amigo/term_details?term=GO:0051345
tissue remodeling	Gene Ontology	GO:0048771	9	153	0.000252264	0.00350965	ENSMUSG00000020053|ENSMUSG00000024066|ENSMUSG00000057123|ENSMUSG00000045092|ENSMUSG00000025473|ENSMUSG00000017737|ENSMUSG00000045730|ENSMUSG00000029304|ENSMUSG00000019577	http://amigo.geneontology.org/cgi-bin/amigo/term_details?term=GO:0048771
anatomical structure formation involved in morphogenesis	Gene Ontology	GO:0048646	29	1085	0.000252375	0.00350965	ENSMUSG00000030093|ENSMUSG00000057123|ENSMUSG00000028128|ENSMUSG00000032484|ENSMUSG00000030790|ENSMUSG00000024190|ENSMUSG00000005824|ENSMUSG00000052837|ENSMUSG00000036144|ENSMUSG00000045730|ENSMUSG00000047146|ENSMUSG00000023034|ENSMUSG00000005320|ENSMUSG00000049001|ENSMUSG00000022018|ENSMUSG00000004328|ENSMUSG00000045092|ENSMUSG00000010797|ENSMUSG00000028194|ENSMUSG00000076431|ENSMUSG00000002289|…	http://amigo.geneontology.org/cgi-bin/amigo/term_details?term=GO:0048646
amide transport	Gene Ontology	GO:0042886	12	265	0.000258982	0.0035922	ENSMUSG00000035828|ENSMUSG00000056054|ENSMUSG00000032204|ENSMUSG00000076431|ENSMUSG00000026473|ENSMUSG00000056071|ENSMUSG00000026981|ENSMUSG00000041794|ENSMUSG00000055116|ENSMUSG00000027398|ENSMUSG00000020848|ENSMUSG00000033685	http://amigo.geneontology.org/cgi-bin/amigo/term_details?term=GO:0042886
growth factor binding	Gene Ontology	GO:0019838	8	121	0.000264155	0.00365448	ENSMUSG00000026981|ENSMUSG00000027947|ENSMUSG00000005124|ENSMUSG00000020427|ENSMUSG00000024190|ENSMUSG00000027656|ENSMUSG00000005320|ENSMUSG00000026073	http://amigo.geneontology.org/cgi-bin/amigo/term_details?term=GO:0019838
enzyme linked receptor protein signaling pathway	Gene Ontology	GO:0007167	22	723	0.000267492	0.00366994	ENSMUSG00000029335|ENSMUSG00000024066|ENSMUSG00000028128|ENSMUSG00000042834|ENSMUSG00000019577|ENSMUSG00000046223|ENSMUSG00000020387|ENSMUSG00000053113|ENSMUSG00000005320|ENSMUSG00000063632|ENSMUSG00000020053|ENSMUSG00000021250|ENSMUSG00000020427|ENSMUSG00000031217|ENSMUSG00000046743|ENSMUSG00000027398|ENSMUSG00000044461|ENSMUSG00000017737|ENSMUSG00000028967|ENSMUSG00000019768|ENSMUSG00000020108|…	http://amigo.geneontology.org/cgi-bin/amigo/term_details?term=GO:0007167
regulation of cardiac muscle hypertrophy	Gene Ontology	GO:0010611	5	40	0.000268014	0.00366994	ENSMUSG00000020053|ENSMUSG00000028967|ENSMUSG00000053965|ENSMUSG00000005124|ENSMUSG00000057604	http://amigo.geneontology.org/cgi-bin/amigo/term_details?term=GO:0010611
positive regulation of transcription factor import into nucleus	Gene Ontology	GO:0042993	5	40	0.000268014	0.00366994	ENSMUSG00000027398|ENSMUSG00000005824|ENSMUSG00000061878|ENSMUSG00000027843|ENSMUSG00000078817	http://amigo.geneontology.org/cgi-bin/amigo/term_details?term=GO:0042993
heterocycle biosynthetic process	Gene Ontology	GO:0018130	62	3061	0.000273268	0.00373234	ENSMUSG00000045092|ENSMUSG00000030093|ENSMUSG00000028211|ENSMUSG00000064120|ENSMUSG00000049892|ENSMUSG00000030790|ENSMUSG00000061718|ENSMUSG00000058755|ENSMUSG00000038402|ENSMUSG00000055116|ENSMUSG00000038342|ENSMUSG00000027513|ENSMUSG00000025330|ENSMUSG00000026077|ENSMUSG00000021886|ENSMUSG00000048756|ENSMUSG00000052837|ENSMUSG00000043099|ENSMUSG00000031431|ENSMUSG00000045730|ENSMUSG00000047146|…	http://amigo.geneontology.org/cgi-bin/amigo/term_details?term=GO:0018130
regulation of muscle contraction	Gene Ontology	GO:0006937	8	122	0.000278399	0.00379274	ENSMUSG00000057123|ENSMUSG00000026576|ENSMUSG00000045613|ENSMUSG00000047250|ENSMUSG00000045730|ENSMUSG00000014813|ENSMUSG00000053965|ENSMUSG00000061878	http://amigo.geneontology.org/cgi-bin/amigo/term_details?term=GO:0006937
regulation of peptide secretion	Gene Ontology	GO:0002791	10	191	0.000282778	0.00382202	ENSMUSG00000035828|ENSMUSG00000056054|ENSMUSG00000076431|ENSMUSG00000026473|ENSMUSG00000056071|ENSMUSG00000041794|ENSMUSG00000055116|ENSMUSG00000027398|ENSMUSG00000020848|ENSMUSG00000033685	http://amigo.geneontology.org/cgi-bin/amigo/term_details?term=GO:0002791
carbohydrate homeostasis	Gene Ontology	GO:0033500	10	191	0.000282778	0.00382202	ENSMUSG00000020053|ENSMUSG00000035828|ENSMUSG00000028893|ENSMUSG00000076431|ENSMUSG00000027513|ENSMUSG00000000628|ENSMUSG00000048756|ENSMUSG00000005320|ENSMUSG00000019577|ENSMUSG00000033685	http://amigo.geneontology.org/cgi-bin/amigo/term_details?term=GO:0033500
glucose homeostasis	Gene Ontology	GO:0042593	10	191	0.000282778	0.00382202	ENSMUSG00000020053|ENSMUSG00000035828|ENSMUSG00000028893|ENSMUSG00000076431|ENSMUSG00000027513|ENSMUSG00000000628|ENSMUSG00000048756|ENSMUSG00000005320|ENSMUSG00000019577|ENSMUSG00000033685	http://amigo.geneontology.org/cgi-bin/amigo/term_details?term=GO:0042593
positive regulation of catalytic activity	Gene Ontology	GO:0043085	24	828	0.000283404	0.00382202	ENSMUSG00000024066|ENSMUSG00000024778|ENSMUSG00000053965|ENSMUSG00000021886|ENSMUSG00000026576|ENSMUSG00000026358|ENSMUSG00000045730|ENSMUSG00000005320|ENSMUSG00000022018|ENSMUSG00000039304|ENSMUSG00000020053|ENSMUSG00000026981|ENSMUSG00000032496|ENSMUSG00000027398|ENSMUSG00000056054|ENSMUSG00000045092|ENSMUSG00000056071|ENSMUSG00000024521|ENSMUSG00000028128|ENSMUSG00000023067|ENSMUSG00000019768|…	http://amigo.geneontology.org/cgi-bin/amigo/term_details?term=GO:0043085
cytokine binding	Gene Ontology	GO:0019955	7	92	0.000287694	0.00387014	ENSMUSG00000026981|ENSMUSG00000027947|ENSMUSG00000025804|ENSMUSG00000044786|ENSMUSG00000028859|ENSMUSG00000026180|ENSMUSG00000026073	http://amigo.geneontology.org/cgi-bin/amigo/term_details?term=GO:0019955
myeloid cell differentiation	Gene Ontology	GO:0030099	13	310	0.000295984	0.00397168	ENSMUSG00000058818|ENSMUSG00000048756|ENSMUSG00000047798|ENSMUSG00000025804|ENSMUSG00000025473|ENSMUSG00000021250|ENSMUSG00000052837|ENSMUSG00000086564|ENSMUSG00000044786|ENSMUSG00000056501|ENSMUSG00000021025|ENSMUSG00000028859|ENSMUSG00000024778	http://amigo.geneontology.org/cgi-bin/amigo/term_details?term=GO:0030099
brown fat cell differentiation	Gene Ontology	GO:0050873	5	41	0.000297575	0.00398305	ENSMUSG00000078566|ENSMUSG00000045730|ENSMUSG00000056501|ENSMUSG00000047446|ENSMUSG00000030545	http://amigo.geneontology.org/cgi-bin/amigo/term_details?term=GO:0050873
signal transduction in response to DNA damage	Gene Ontology	GO:0042770	6	65	0.000299571	0.00398981	ENSMUSG00000048756|ENSMUSG00000028893|ENSMUSG00000076431|ENSMUSG00000043099|ENSMUSG00000024521|ENSMUSG00000023067	http://amigo.geneontology.org/cgi-bin/amigo/term_details?term=GO:0042770
cardiac muscle hypertrophy	Gene Ontology	GO:0003300	6	65	0.000299571	0.00398981	ENSMUSG00000020053|ENSMUSG00000057604|ENSMUSG00000030087|ENSMUSG00000005124|ENSMUSG00000028967|ENSMUSG00000053965	http://amigo.geneontology.org/cgi-bin/amigo/term_details?term=GO:0003300
regulation of peptide transport	Gene Ontology	GO:0090087	10	193	0.000306005	0.00404534	ENSMUSG00000035828|ENSMUSG00000056054|ENSMUSG00000076431|ENSMUSG00000026473|ENSMUSG00000056071|ENSMUSG00000041794|ENSMUSG00000055116|ENSMUSG00000027398|ENSMUSG00000020848|ENSMUSG00000033685	http://amigo.geneontology.org/cgi-bin/amigo/term_details?term=GO:0090087
leukocyte homeostasis	Gene Ontology	GO:0001776	7	93	0.000306007	0.00404534	ENSMUSG00000058818|ENSMUSG00000003882|ENSMUSG00000024521|ENSMUSG00000031431|ENSMUSG00000045502|ENSMUSG00000026180|ENSMUSG00000024778	http://amigo.geneontology.org/cgi-bin/amigo/term_details?term=GO:0001776
positive regulation of cysteine-type endopeptidase activity involved in apoptotic process	Gene Ontology	GO:0043280	7	93	0.000306007	0.00404534	ENSMUSG00000024066|ENSMUSG00000056054|ENSMUSG00000056071|ENSMUSG00000024521|ENSMUSG00000028128|ENSMUSG00000039304|ENSMUSG00000024778	http://amigo.geneontology.org/cgi-bin/amigo/term_details?term=GO:0043280
negative regulation of protein phosphorylation	Gene Ontology	GO:0001933	14	354	0.000310134	0.0040898	ENSMUSG00000020053|ENSMUSG00000024066|ENSMUSG00000027843|ENSMUSG00000078817|ENSMUSG00000023067|ENSMUSG00000020427|ENSMUSG00000024190|ENSMUSG00000028967|ENSMUSG00000026628|ENSMUSG00000053113|ENSMUSG00000061718|ENSMUSG00000027398|ENSMUSG00000020108|ENSMUSG00000020893	http://amigo.geneontology.org/cgi-bin/amigo/term_details?term=GO:0001933
positive regulation of neutrophil chemotaxis	Gene Ontology	GO:0090023	4	22	0.000315907	0.00414468	ENSMUSG00000027398|ENSMUSG00000026180|ENSMUSG00000026581|ENSMUSG00000049130	http://amigo.geneontology.org/cgi-bin/amigo/term_details?term=GO:0090023
response to organic cyclic compound	Gene Ontology	GO:0014070	19	584	0.000316432	0.00414468	ENSMUSG00000020053|ENSMUSG00000026981|ENSMUSG00000026480|ENSMUSG00000052837|ENSMUSG00000027398|ENSMUSG00000029135|ENSMUSG00000019970|ENSMUSG00000024529|ENSMUSG00000026581|ENSMUSG00000029304|ENSMUSG00000055116|ENSMUSG00000044786|ENSMUSG00000023034|ENSMUSG00000019768|ENSMUSG00000007659|ENSMUSG00000021025|ENSMUSG00000020108|ENSMUSG00000020893|ENSMUSG00000024778	http://amigo.geneontology.org/cgi-bin/amigo/term_details?term=GO:0014070
cytoplasmic sequestering of NF-kappaB	Gene Ontology	GO:0007253	3	8	0.000318166	0.00414468	ENSMUSG00000021025|ENSMUSG00000078817|ENSMUSG00000005824	http://amigo.geneontology.org/cgi-bin/amigo/term_details?term=GO:0007253
arachidonic acid binding	Gene Ontology	GO:0050544	3	8	0.000318166	0.00414468	ENSMUSG00000056071|ENSMUSG00000056054|ENSMUSG00000060063	http://amigo.geneontology.org/cgi-bin/amigo/term_details?term=GO:0050544
icosanoid binding	Gene Ontology	GO:0050542	3	8	0.000318166	0.00414468	ENSMUSG00000056071|ENSMUSG00000056054|ENSMUSG00000060063	http://amigo.geneontology.org/cgi-bin/amigo/term_details?term=GO:0050542
regulation of epithelial cell apoptotic process	Gene Ontology	GO:1904035	6	66	0.000323333	0.00418182	ENSMUSG00000020053|ENSMUSG00000048756|ENSMUSG00000002289|ENSMUSG00000044786|ENSMUSG00000049001|ENSMUSG00000022018	http://amigo.geneontology.org/cgi-bin/amigo/term_details?term=GO:1904035
antioxidant activity	Gene Ontology	GO:0016209	6	66	0.000323333	0.00418182	ENSMUSG00000028211|ENSMUSG00000038332|ENSMUSG00000056054|ENSMUSG00000028893|ENSMUSG00000056071|ENSMUSG00000047250	http://amigo.geneontology.org/cgi-bin/amigo/term_details?term=GO:0016209
response to inorganic substance	Gene Ontology	GO:0010035	13	313	0.000323361	0.00418182	ENSMUSG00000024066|ENSMUSG00000048756|ENSMUSG00000032204|ENSMUSG00000052837|ENSMUSG00000078566|ENSMUSG00000021250|ENSMUSG00000027015|ENSMUSG00000031765|ENSMUSG00000023034|ENSMUSG00000060063|ENSMUSG00000031762|ENSMUSG00000024778|ENSMUSG00000033685	http://amigo.geneontology.org/cgi-bin/amigo/term_details?term=GO:0010035
positive regulation of secretion by cell	Gene Ontology	GO:1903532	14	356	0.000327509	0.00422526	ENSMUSG00000020053|ENSMUSG00000030142|ENSMUSG00000027843|ENSMUSG00000076431|ENSMUSG00000026473|ENSMUSG00000020848|ENSMUSG00000041794|ENSMUSG00000045502|ENSMUSG00000005320|ENSMUSG00000027398|ENSMUSG00000015568|ENSMUSG00000063632|ENSMUSG00000022018|ENSMUSG00000061878	http://amigo.geneontology.org/cgi-bin/amigo/term_details?term=GO:1903532
regulation of muscle hypertrophy	Gene Ontology	GO:0014743	5	42	0.000329543	0.00424129	ENSMUSG00000020053|ENSMUSG00000028967|ENSMUSG00000053965|ENSMUSG00000005124|ENSMUSG00000057604	http://amigo.geneontology.org/cgi-bin/amigo/term_details?term=GO:0014743
negative regulation of developmental process	Gene Ontology	GO:0051093	23	787	0.000338939	0.00435175	ENSMUSG00000024066|ENSMUSG00000030093|ENSMUSG00000000901|ENSMUSG00000032484|ENSMUSG00000036144|ENSMUSG00000055116|ENSMUSG00000048756|ENSMUSG00000031431|ENSMUSG00000045730|ENSMUSG00000021025|ENSMUSG00000063632|ENSMUSG00000022018|ENSMUSG00000020053|ENSMUSG00000037962|ENSMUSG00000025804|ENSMUSG00000027398|ENSMUSG00000028211|ENSMUSG00000078566|ENSMUSG00000001227|ENSMUSG00000021508|ENSMUSG00000044786|…	http://amigo.geneontology.org/cgi-bin/amigo/term_details?term=GO:0051093
positive regulation of mitochondrion organization	Gene Ontology	GO:0010822	8	126	0.000341798	0.00437795	ENSMUSG00000046223|ENSMUSG00000024521|ENSMUSG00000017737|ENSMUSG00000078566|ENSMUSG00000045730|ENSMUSG00000000628|ENSMUSG00000039304|ENSMUSG00000024778	http://amigo.geneontology.org/cgi-bin/amigo/term_details?term=GO:0010822
peptide secretion	Gene Ontology	GO:0002790	11	235	0.000355497	0.00454255	ENSMUSG00000035828|ENSMUSG00000056054|ENSMUSG00000076431|ENSMUSG00000026473|ENSMUSG00000056071|ENSMUSG00000026981|ENSMUSG00000041794|ENSMUSG00000055116|ENSMUSG00000027398|ENSMUSG00000020848|ENSMUSG00000033685	http://amigo.geneontology.org/cgi-bin/amigo/term_details?term=GO:0002790
cytokine secretion	Gene Ontology	GO:0050663	9	161	0.000360099	0.00459041	ENSMUSG00000030142|ENSMUSG00000027843|ENSMUSG00000078817|ENSMUSG00000027398|ENSMUSG00000037922|ENSMUSG00000015568|ENSMUSG00000026073|ENSMUSG00000022018|ENSMUSG00000042265	http://amigo.geneontology.org/cgi-bin/amigo/term_details?term=GO:0050663
acylglycerol metabolic process	Gene Ontology	GO:0006639	7	96	0.000366627	0.00466252	ENSMUSG00000027513|ENSMUSG00000024042|ENSMUSG00000057074|ENSMUSG00000019768|ENSMUSG00000015568|ENSMUSG00000020593|ENSMUSG00000025509	http://amigo.geneontology.org/cgi-bin/amigo/term_details?term=GO:0006639
ion homeostasis	Gene Ontology	GO:0050801	19	592	0.000372216	0.00472238	ENSMUSG00000045092|ENSMUSG00000044026|ENSMUSG00000057123|ENSMUSG00000014813|ENSMUSG00000026576|ENSMUSG00000025804|ENSMUSG00000040907|ENSMUSG00000019970|ENSMUSG00000030790|ENSMUSG00000032496|ENSMUSG00000049130|ENSMUSG00000031770|ENSMUSG00000019768|ENSMUSG00000027398|ENSMUSG00000005320|ENSMUSG00000031762|ENSMUSG00000026180|ENSMUSG00000031765|ENSMUSG00000019577	http://amigo.geneontology.org/cgi-bin/amigo/term_details?term=GO:0050801
striated muscle hypertrophy	Gene Ontology	GO:0014897	6	68	0.000375271	0.00474989	ENSMUSG00000020053|ENSMUSG00000057604|ENSMUSG00000030087|ENSMUSG00000005124|ENSMUSG00000028967|ENSMUSG00000053965	http://amigo.geneontology.org/cgi-bin/amigo/term_details?term=GO:0014897
positive regulation of vasculature development	Gene Ontology	GO:1904018	8	128	0.000377647	0.00476868	ENSMUSG00000028128|ENSMUSG00000028194|ENSMUSG00000017737|ENSMUSG00000030790|ENSMUSG00000049130|ENSMUSG00000027398|ENSMUSG00000026180|ENSMUSG00000061878	http://amigo.geneontology.org/cgi-bin/amigo/term_details?term=GO:1904018
carboxylic acid transmembrane transporter activity	Gene Ontology	GO:0046943	7	97	0.000388842	0.00489849	ENSMUSG00000022464|ENSMUSG00000029321|ENSMUSG00000022180|ENSMUSG00000017707|ENSMUSG00000027737|ENSMUSG00000038178|ENSMUSG00000030495	http://amigo.geneontology.org/cgi-bin/amigo/term_details?term=GO:0046943
cellular response to hormone stimulus	Gene Ontology	GO:0032870	15	407	0.000392065	0.0049275	ENSMUSG00000020053|ENSMUSG00000026480|ENSMUSG00000052837|ENSMUSG00000024042|ENSMUSG00000019970|ENSMUSG00000044786|ENSMUSG00000053113|ENSMUSG00000023034|ENSMUSG00000019768|ENSMUSG00000027398|ENSMUSG00000055116|ENSMUSG00000020108|ENSMUSG00000020893|ENSMUSG00000020593|ENSMUSG00000019577	http://amigo.geneontology.org/cgi-bin/amigo/term_details?term=GO:0032870
amino acid transmembrane transporter activity	Gene Ontology	GO:0015171	6	69	0.000403573	0.00506025	ENSMUSG00000022464|ENSMUSG00000022180|ENSMUSG00000017707|ENSMUSG00000027737|ENSMUSG00000038178|ENSMUSG00000030495	http://amigo.geneontology.org/cgi-bin/amigo/term_details?term=GO:0015171
organic acid transmembrane transporter activity	Gene Ontology	GO:0005342	7	98	0.00041212	0.00514334	ENSMUSG00000022464|ENSMUSG00000029321|ENSMUSG00000022180|ENSMUSG00000017707|ENSMUSG00000027737|ENSMUSG00000038178|ENSMUSG00000030495	http://amigo.geneontology.org/cgi-bin/amigo/term_details?term=GO:0005342
neutral lipid metabolic process	Gene Ontology	GO:0006638	7	98	0.00041212	0.00514334	ENSMUSG00000027513|ENSMUSG00000024042|ENSMUSG00000057074|ENSMUSG00000019768|ENSMUSG00000015568|ENSMUSG00000020593|ENSMUSG00000025509	http://amigo.geneontology.org/cgi-bin/amigo/term_details?term=GO:0006638
transmembrane receptor protein tyrosine kinase signaling pathway	Gene Ontology	GO:0007169	16	455	0.000416245	0.0051727	ENSMUSG00000020053|ENSMUSG00000024066|ENSMUSG00000017737|ENSMUSG00000028967|ENSMUSG00000028128|ENSMUSG00000046223|ENSMUSG00000020427|ENSMUSG00000031217|ENSMUSG00000053113|ENSMUSG00000046743|ENSMUSG00000019768|ENSMUSG00000027398|ENSMUSG00000005320|ENSMUSG00000020108|ENSMUSG00000044461|ENSMUSG00000019577	http://amigo.geneontology.org/cgi-bin/amigo/term_details?term=GO:0007169
cellular response to lipid	Gene Ontology	GO:0071396	14	365	0.000416405	0.0051727	ENSMUSG00000020053|ENSMUSG00000056501|ENSMUSG00000027843|ENSMUSG00000019970|ENSMUSG00000032496|ENSMUSG00000055116|ENSMUSG00000044786|ENSMUSG00000023034|ENSMUSG00000019768|ENSMUSG00000027398|ENSMUSG00000021025|ENSMUSG00000020108|ENSMUSG00000020893|ENSMUSG00000019577	http://amigo.geneontology.org/cgi-bin/amigo/term_details?term=GO:0071396
icosatetraenoic acid binding	Gene Ontology	GO:0050543	3	9	0.000420205	0.00519579	ENSMUSG00000056071|ENSMUSG00000056054|ENSMUSG00000060063	http://amigo.geneontology.org/cgi-bin/amigo/term_details?term=GO:0050543
negative regulation of membrane potential	Gene Ontology	GO:0045837	3	9	0.000420205	0.00519579	ENSMUSG00000026981|ENSMUSG00000078566|ENSMUSG00000024521	http://amigo.geneontology.org/cgi-bin/amigo/term_details?term=GO:0045837
response to peptide hormone	Gene Ontology	GO:0043434	11	240	0.00042127	0.00519696	ENSMUSG00000020053|ENSMUSG00000027513|ENSMUSG00000028893|ENSMUSG00000019970|ENSMUSG00000079012|ENSMUSG00000053113|ENSMUSG00000023034|ENSMUSG00000027398|ENSMUSG00000066361|ENSMUSG00000020593|ENSMUSG00000019577	http://amigo.geneontology.org/cgi-bin/amigo/term_details?term=GO:0043434
positive regulation of granulocyte chemotaxis	Gene Ontology	GO:0071624	4	24	0.000424024	0.0052189	ENSMUSG00000027398|ENSMUSG00000026180|ENSMUSG00000026581|ENSMUSG00000049130	http://amigo.geneontology.org/cgi-bin/amigo/term_details?term=GO:0071624
muscle hypertrophy	Gene Ontology	GO:0014896	6	70	0.000433513	0.00532346	ENSMUSG00000020053|ENSMUSG00000057604|ENSMUSG00000030087|ENSMUSG00000005124|ENSMUSG00000028967|ENSMUSG00000053965	http://amigo.geneontology.org/cgi-bin/amigo/term_details?term=GO:0014896
positive regulation of inflammatory response	Gene Ontology	GO:0050729	7	99	0.000436499	0.00533566	ENSMUSG00000056054|ENSMUSG00000056071|ENSMUSG00000060063|ENSMUSG00000025473|ENSMUSG00000027398|ENSMUSG00000053965|ENSMUSG00000019122	http://amigo.geneontology.org/cgi-bin/amigo/term_details?term=GO:0050729
core promoter sequence-specific DNA binding	Gene Ontology	GO:0001046	7	99	0.000436499	0.00533566	ENSMUSG00000076431|ENSMUSG00000021250|ENSMUSG00000056749|ENSMUSG00000056501|ENSMUSG00000055116|ENSMUSG00000063632|ENSMUSG00000019768	http://amigo.geneontology.org/cgi-bin/amigo/term_details?term=GO:0001046
intrinsic component of plasma membrane	Gene Ontology	GO:0031226	28	1069	0.000441097	0.00535594	ENSMUSG00000057123|ENSMUSG00000045613|ENSMUSG00000030351|ENSMUSG00000029321|ENSMUSG00000003153|ENSMUSG00000026576|ENSMUSG00000032204|ENSMUSG00000033998|ENSMUSG00000040907|ENSMUSG00000046223|ENSMUSG00000045730|ENSMUSG00000038178|ENSMUSG00000030495|ENSMUSG00000040451|ENSMUSG00000005320|ENSMUSG00000045092|ENSMUSG00000027947|ENSMUSG00000028255|ENSMUSG00000019851|ENSMUSG00000028655|ENSMUSG00000022464|…	http://amigo.geneontology.org/cgi-bin/amigo/term_details?term=GO:0031226
negative regulation of cytokine secretion	Gene Ontology	GO:0050710	5	45	0.000441159	0.00535594	ENSMUSG00000078817|ENSMUSG00000026073|ENSMUSG00000022018|ENSMUSG00000027843|ENSMUSG00000037922	http://amigo.geneontology.org/cgi-bin/amigo/term_details?term=GO:0050710
negative regulation of MAPK cascade	Gene Ontology	GO:0043409	8	132	0.000458537	0.00555432	ENSMUSG00000020053|ENSMUSG00000027843|ENSMUSG00000024190|ENSMUSG00000028967|ENSMUSG00000026628|ENSMUSG00000027398|ENSMUSG00000078817|ENSMUSG00000020893	http://amigo.geneontology.org/cgi-bin/amigo/term_details?term=GO:0043409
acute inflammatory response	Gene Ontology	GO:0002526	7	100	0.000462016	0.00558383	ENSMUSG00000026981|ENSMUSG00000008845|ENSMUSG00000025473|ENSMUSG00000028128|ENSMUSG00000060063|ENSMUSG00000027398|ENSMUSG00000026180	http://amigo.geneontology.org/cgi-bin/amigo/term_details?term=GO:0002526
transcription factor activity, RNA polymerase II core promoter proximal region sequence-specific binding	Gene Ontology	GO:0000982	13	327	0.000481494	0.00580612	ENSMUSG00000076431|ENSMUSG00000020423|ENSMUSG00000021250|ENSMUSG00000052837|ENSMUSG00000036144|ENSMUSG00000026628|ENSMUSG00000056749|ENSMUSG00000023034|ENSMUSG00000019768|ENSMUSG00000055116|ENSMUSG00000063632|ENSMUSG00000029135|ENSMUSG00000056501	http://amigo.geneontology.org/cgi-bin/amigo/term_details?term=GO:0000982
amino acid transmembrane transport	Gene Ontology	GO:0003333	4	25	0.00048694	0.00584963	ENSMUSG00000027737|ENSMUSG00000030495|ENSMUSG00000022464|ENSMUSG00000022180	http://amigo.geneontology.org/cgi-bin/amigo/term_details?term=GO:0003333
regulation of ion transport	Gene Ontology	GO:0043269	17	509	0.00048838	0.00584963	ENSMUSG00000020053|ENSMUSG00000057123|ENSMUSG00000003484|ENSMUSG00000026576|ENSMUSG00000014813|ENSMUSG00000025804|ENSMUSG00000024042|ENSMUSG00000017737|ENSMUSG00000019970|ENSMUSG00000026981|ENSMUSG00000027483|ENSMUSG00000045730|ENSMUSG00000047330|ENSMUSG00000078532|ENSMUSG00000027398|ENSMUSG00000046182|ENSMUSG00000020893	http://amigo.geneontology.org/cgi-bin/amigo/term_details?term=GO:0043269
positive regulation of organelle organization	Gene Ontology	GO:0010638	17	509	0.00048838	0.00584963	ENSMUSG00000020053|ENSMUSG00000021886|ENSMUSG00000017737|ENSMUSG00000024521|ENSMUSG00000046223|ENSMUSG00000078566|ENSMUSG00000045730|ENSMUSG00000020593|ENSMUSG00000047146|ENSMUSG00000000628|ENSMUSG00000039304|ENSMUSG00000037447|ENSMUSG00000027398|ENSMUSG00000058624|ENSMUSG00000020848|ENSMUSG00000022018|ENSMUSG00000024778	http://amigo.geneontology.org/cgi-bin/amigo/term_details?term=GO:0010638
regulation of lymphocyte activation	Gene Ontology	GO:0051249	13	328	0.000494941	0.00591498	ENSMUSG00000020053|ENSMUSG00000027843|ENSMUSG00000003882|ENSMUSG00000023067|ENSMUSG00000031217|ENSMUSG00000056501|ENSMUSG00000025473|ENSMUSG00000053965|ENSMUSG00000027398|ENSMUSG00000005824|ENSMUSG00000063632|ENSMUSG00000024778|ENSMUSG00000037922	http://amigo.geneontology.org/cgi-bin/amigo/term_details?term=GO:0051249
inorganic ion homeostasis	Gene Ontology	GO:0098771	18	559	0.000509126	0.00605746	ENSMUSG00000045092|ENSMUSG00000044026|ENSMUSG00000014813|ENSMUSG00000026576|ENSMUSG00000025804|ENSMUSG00000040907|ENSMUSG00000019970|ENSMUSG00000030790|ENSMUSG00000032496|ENSMUSG00000049130|ENSMUSG00000031770|ENSMUSG00000019768|ENSMUSG00000027398|ENSMUSG00000005320|ENSMUSG00000031762|ENSMUSG00000026180|ENSMUSG00000031765|ENSMUSG00000019577	http://amigo.geneontology.org/cgi-bin/amigo/term_details?term=GO:0098771
lipid biosynthetic process	Gene Ontology	GO:0008610	16	464	0.000510928	0.00606543	ENSMUSG00000020053|ENSMUSG00000027513|ENSMUSG00000025789|ENSMUSG00000027952|ENSMUSG00000024042|ENSMUSG00000027875|ENSMUSG00000047250|ENSMUSG00000005320|ENSMUSG00000040451|ENSMUSG00000060063|ENSMUSG00000015568|ENSMUSG00000027398|ENSMUSG00000027068|ENSMUSG00000020593|ENSMUSG00000061878|ENSMUSG00000019577	http://amigo.geneontology.org/cgi-bin/amigo/term_details?term=GO:0008610
response to extracellular stimulus	Gene Ontology	GO:0009991	11	246	0.000513386	0.00608112	ENSMUSG00000027513|ENSMUSG00000026473|ENSMUSG00000021250|ENSMUSG00000017737|ENSMUSG00000023067|ENSMUSG00000002289|ENSMUSG00000029304|ENSMUSG00000026628|ENSMUSG00000044786|ENSMUSG00000045730|ENSMUSG00000019577	http://amigo.geneontology.org/cgi-bin/amigo/term_details?term=GO:0009991
negative regulation of immune system process	Gene Ontology	GO:0002683	13	330	0.000522792	0.00617817	ENSMUSG00000027843|ENSMUSG00000025804|ENSMUSG00000003882|ENSMUSG00000053965|ENSMUSG00000031431|ENSMUSG00000044786|ENSMUSG00000056501|ENSMUSG00000025473|ENSMUSG00000021025|ENSMUSG00000037922|ENSMUSG00000026180|ENSMUSG00000063632|ENSMUSG00000024778	http://amigo.geneontology.org/cgi-bin/amigo/term_details?term=GO:0002683
aromatic compound biosynthetic process	Gene Ontology	GO:0019438	61	3074	0.000523887	0.00617817	ENSMUSG00000045092|ENSMUSG00000030093|ENSMUSG00000028211|ENSMUSG00000049892|ENSMUSG00000030790|ENSMUSG00000061718|ENSMUSG00000058755|ENSMUSG00000038402|ENSMUSG00000055116|ENSMUSG00000038342|ENSMUSG00000027513|ENSMUSG00000025330|ENSMUSG00000026077|ENSMUSG00000021886|ENSMUSG00000048756|ENSMUSG00000052837|ENSMUSG00000043099|ENSMUSG00000031431|ENSMUSG00000045730|ENSMUSG00000047146|ENSMUSG00000035456|…	http://amigo.geneontology.org/cgi-bin/amigo/term_details?term=GO:0019438
regulation of mitochondrion organization	Gene Ontology	GO:0010821	9	171	0.000545745	0.0064218	ENSMUSG00000020053|ENSMUSG00000017737|ENSMUSG00000024521|ENSMUSG00000046223|ENSMUSG00000078566|ENSMUSG00000045730|ENSMUSG00000000628|ENSMUSG00000039304|ENSMUSG00000024778	http://amigo.geneontology.org/cgi-bin/amigo/term_details?term=GO:0010821
nucleobase-containing compound biosynthetic process	Gene Ontology	GO:0034654	60	3015	0.000547129	0.00642397	ENSMUSG00000045092|ENSMUSG00000030093|ENSMUSG00000028211|ENSMUSG00000049892|ENSMUSG00000030790|ENSMUSG00000061718|ENSMUSG00000058755|ENSMUSG00000038402|ENSMUSG00000055116|ENSMUSG00000038342|ENSMUSG00000027513|ENSMUSG00000025330|ENSMUSG00000021886|ENSMUSG00000048756|ENSMUSG00000052837|ENSMUSG00000043099|ENSMUSG00000031431|ENSMUSG00000045730|ENSMUSG00000047146|ENSMUSG00000035456|ENSMUSG00000023034|…	http://amigo.geneontology.org/cgi-bin/amigo/term_details?term=GO:0034654
cellular metal ion homeostasis	Gene Ontology	GO:0006875	15	421	0.000549853	0.00644183	ENSMUSG00000045092|ENSMUSG00000044026|ENSMUSG00000014813|ENSMUSG00000026576|ENSMUSG00000025804|ENSMUSG00000040907|ENSMUSG00000019970|ENSMUSG00000030790|ENSMUSG00000049130|ENSMUSG00000031770|ENSMUSG00000019768|ENSMUSG00000027398|ENSMUSG00000031762|ENSMUSG00000026180|ENSMUSG00000031765	http://amigo.geneontology.org/cgi-bin/amigo/term_details?term=GO:0006875
regulation of neutrophil chemotaxis	Gene Ontology	GO:0090022	4	26	0.000556226	0.00650226	ENSMUSG00000027398|ENSMUSG00000026180|ENSMUSG00000026581|ENSMUSG00000049130	http://amigo.geneontology.org/cgi-bin/amigo/term_details?term=GO:0090022
skeletal system development	Gene Ontology	GO:0001501	15	422	0.00056295	0.00656652	ENSMUSG00000020053|ENSMUSG00000030093|ENSMUSG00000057123|ENSMUSG00000037962|ENSMUSG00000076431|ENSMUSG00000017737|ENSMUSG00000054675|ENSMUSG00000032496|ENSMUSG00000046743|ENSMUSG00000037447|ENSMUSG00000045672|ENSMUSG00000029335|ENSMUSG00000014813|ENSMUSG00000063632|ENSMUSG00000021765	http://amigo.geneontology.org/cgi-bin/amigo/term_details?term=GO:0001501
peptide transport	Gene Ontology	GO:0015833	11	251	0.000602489	0.00701245	ENSMUSG00000035828|ENSMUSG00000056054|ENSMUSG00000076431|ENSMUSG00000026473|ENSMUSG00000056071|ENSMUSG00000026981|ENSMUSG00000041794|ENSMUSG00000055116|ENSMUSG00000027398|ENSMUSG00000020848|ENSMUSG00000033685	http://amigo.geneontology.org/cgi-bin/amigo/term_details?term=GO:0015833
glucose transport	Gene Ontology	GO:0015758	7	105	0.000608025	0.00704625	ENSMUSG00000020053|ENSMUSG00000028893|ENSMUSG00000030087|ENSMUSG00000000628|ENSMUSG00000019768|ENSMUSG00000027398|ENSMUSG00000003153	http://amigo.geneontology.org/cgi-bin/amigo/term_details?term=GO:0015758
regulation of transcription factor import into nucleus	Gene Ontology	GO:0042990	6	75	0.000610134	0.00705542	ENSMUSG00000027843|ENSMUSG00000078817|ENSMUSG00000021025|ENSMUSG00000027398|ENSMUSG00000005824|ENSMUSG00000061878	http://amigo.geneontology.org/cgi-bin/amigo/term_details?term=GO:0042990
homeostasis of number of cells	Gene Ontology	GO:0048872	11	252	0.000621773	0.00715908	ENSMUSG00000058818|ENSMUSG00000048756|ENSMUSG00000003882|ENSMUSG00000024521|ENSMUSG00000031431|ENSMUSG00000044786|ENSMUSG00000005686|ENSMUSG00000045502|ENSMUSG00000026180|ENSMUSG00000009628|ENSMUSG00000024778	http://amigo.geneontology.org/cgi-bin/amigo/term_details?term=GO:0048872
negative regulation of I-kappaB kinase/NF-kappaB signaling	Gene Ontology	GO:0043124	5	49	0.000631603	0.0072509	ENSMUSG00000021025|ENSMUSG00000078817|ENSMUSG00000005824|ENSMUSG00000020893|ENSMUSG00000019768	http://amigo.geneontology.org/cgi-bin/amigo/term_details?term=GO:0043124
protein kinase B signaling	Gene Ontology	GO:0043491	8	139	0.000633607	0.0072509	ENSMUSG00000020053|ENSMUSG00000038332|ENSMUSG00000024066|ENSMUSG00000025473|ENSMUSG00000028128|ENSMUSG00000027398|ENSMUSG00000028893|ENSMUSG00000037922	http://amigo.geneontology.org/cgi-bin/amigo/term_details?term=GO:0043491
regulation of cellular biosynthetic process	Gene Ontology	GO:0031326	62	3162	0.000633811	0.0072509	ENSMUSG00000045092|ENSMUSG00000030093|ENSMUSG00000028211|ENSMUSG00000049892|ENSMUSG00000030790|ENSMUSG00000056501|ENSMUSG00000058755|ENSMUSG00000038402|ENSMUSG00000055116|ENSMUSG00000038342|ENSMUSG00000027513|ENSMUSG00000025330|ENSMUSG00000019577|ENSMUSG00000021886|ENSMUSG00000048756|ENSMUSG00000030087|ENSMUSG00000052837|ENSMUSG00000043099|ENSMUSG00000031431|ENSMUSG00000045730|ENSMUSG00000047146|…	http://amigo.geneontology.org/cgi-bin/amigo/term_details?term=GO:0031326
apical plasma membrane	Gene Ontology	GO:0016324	11	253	0.000641569	0.00732401	ENSMUSG00000027947|ENSMUSG00000026576|ENSMUSG00000029802|ENSMUSG00000033998|ENSMUSG00000045730|ENSMUSG00000003484|ENSMUSG00000041794|ENSMUSG00000040055|ENSMUSG00000014813|ENSMUSG00000024778|ENSMUSG00000047330	http://amigo.geneontology.org/cgi-bin/amigo/term_details?term=GO:0016324
positive regulation of cellular catabolic process	Gene Ontology	GO:0031331	9	176	0.000664454	0.00755305	ENSMUSG00000020053|ENSMUSG00000020423|ENSMUSG00000020427|ENSMUSG00000045730|ENSMUSG00000044786|ENSMUSG00000031770|ENSMUSG00000025473|ENSMUSG00000027398|ENSMUSG00000025509	http://amigo.geneontology.org/cgi-bin/amigo/term_details?term=GO:0031331
cellular response to nitrogen compound	Gene Ontology	GO:1901699	14	384	0.000673437	0.00763319	ENSMUSG00000020053|ENSMUSG00000038332|ENSMUSG00000056501|ENSMUSG00000028893|ENSMUSG00000027843|ENSMUSG00000045613|ENSMUSG00000019970|ENSMUSG00000053113|ENSMUSG00000023034|ENSMUSG00000019768|ENSMUSG00000007659|ENSMUSG00000027398|ENSMUSG00000020593|ENSMUSG00000019577	http://amigo.geneontology.org/cgi-bin/amigo/term_details?term=GO:1901699
monosaccharide transport	Gene Ontology	GO:0015749	7	107	0.000675781	0.00763319	ENSMUSG00000020053|ENSMUSG00000028893|ENSMUSG00000030087|ENSMUSG00000000628|ENSMUSG00000019768|ENSMUSG00000027398|ENSMUSG00000003153	http://amigo.geneontology.org/cgi-bin/amigo/term_details?term=GO:0015749
hexose transport	Gene Ontology	GO:0008645	7	107	0.000675781	0.00763319	ENSMUSG00000020053|ENSMUSG00000028893|ENSMUSG00000030087|ENSMUSG00000000628|ENSMUSG00000019768|ENSMUSG00000027398|ENSMUSG00000003153	http://amigo.geneontology.org/cgi-bin/amigo/term_details?term=GO:0008645
protein nitrosylation	Gene Ontology	GO:0017014	3	11	0.000682157	0.00768898	ENSMUSG00000056071|ENSMUSG00000056054|ENSMUSG00000028194	http://amigo.geneontology.org/cgi-bin/amigo/term_details?term=GO:0017014
cellular nitrogen compound biosynthetic process	Gene Ontology	GO:0044271	68	3565	0.000691657	0.00777968	ENSMUSG00000045092|ENSMUSG00000025789|ENSMUSG00000030093|ENSMUSG00000028211|ENSMUSG00000049892|ENSMUSG00000030790|ENSMUSG00000061718|ENSMUSG00000058755|ENSMUSG00000038402|ENSMUSG00000055116|ENSMUSG00000038342|ENSMUSG00000027513|ENSMUSG00000025330|ENSMUSG00000033685|ENSMUSG00000021886|ENSMUSG00000048756|ENSMUSG00000030087|ENSMUSG00000026077|ENSMUSG00000052837|ENSMUSG00000043099|ENSMUSG00000040740|…	http://amigo.geneontology.org/cgi-bin/amigo/term_details?term=GO:0044271
transcription factor import into nucleus	Gene Ontology	GO:0042991	6	77	0.000694637	0.00779682	ENSMUSG00000027843|ENSMUSG00000078817|ENSMUSG00000021025|ENSMUSG00000027398|ENSMUSG00000005824|ENSMUSG00000061878	http://amigo.geneontology.org/cgi-bin/amigo/term_details?term=GO:0042991
response to carbohydrate	Gene Ontology	GO:0009743	8	142	0.000723501	0.00809887	ENSMUSG00000020053|ENSMUSG00000035828|ENSMUSG00000028893|ENSMUSG00000026480|ENSMUSG00000076431|ENSMUSG00000026473|ENSMUSG00000027398|ENSMUSG00000033685	http://amigo.geneontology.org/cgi-bin/amigo/term_details?term=GO:0009743
anion binding	Gene Ontology	GO:0043168	11	257	0.000726085	0.00809887	ENSMUSG00000027513|ENSMUSG00000038332|ENSMUSG00000056054|ENSMUSG00000028893|ENSMUSG00000028194|ENSMUSG00000026473|ENSMUSG00000056071|ENSMUSG00000030474|ENSMUSG00000028003|ENSMUSG00000060063|ENSMUSG00000027360	http://amigo.geneontology.org/cgi-bin/amigo/term_details?term=GO:0043168
response to virus	Gene Ontology	GO:0009615	11	257	0.000726085	0.00809887	ENSMUSG00000032661|ENSMUSG00000026576|ENSMUSG00000042265|ENSMUSG00000027843|ENSMUSG00000033777|ENSMUSG00000078566|ENSMUSG00000017707|ENSMUSG00000057604|ENSMUSG00000007659|ENSMUSG00000020108|ENSMUSG00000019577	http://amigo.geneontology.org/cgi-bin/amigo/term_details?term=GO:0009615
regulation of ossification	Gene Ontology	GO:0030278	9	179	0.000745271	0.00829559	ENSMUSG00000020053|ENSMUSG00000045092|ENSMUSG00000037962|ENSMUSG00000025804|ENSMUSG00000032496|ENSMUSG00000045730|ENSMUSG00000056501|ENSMUSG00000054675|ENSMUSG00000063632	http://amigo.geneontology.org/cgi-bin/amigo/term_details?term=GO:0030278
memory	Gene Ontology	GO:0007613	7	109	0.000749386	0.0083241	ENSMUSG00000020053|ENSMUSG00000026981|ENSMUSG00000040907|ENSMUSG00000019970|ENSMUSG00000047250|ENSMUSG00000027398|ENSMUSG00000053965	http://amigo.geneontology.org/cgi-bin/amigo/term_details?term=GO:0007613
negative regulation of catalytic activity	Gene Ontology	GO:0043086	18	579	0.000754455	0.00835898	ENSMUSG00000020053|ENSMUSG00000028967|ENSMUSG00000046223|ENSMUSG00000024190|ENSMUSG00000027843|ENSMUSG00000027398|ENSMUSG00000032484|ENSMUSG00000023067|ENSMUSG00000032496|ENSMUSG00000002289|ENSMUSG00000017737|ENSMUSG00000053113|ENSMUSG00000031770|ENSMUSG00000061718|ENSMUSG00000057719|ENSMUSG00000023034|ENSMUSG00000066361|ENSMUSG00000079012	http://amigo.geneontology.org/cgi-bin/amigo/term_details?term=GO:0043086
regulation of cytokine secretion	Gene Ontology	GO:0050707	8	143	0.000755649	0.00835898	ENSMUSG00000030142|ENSMUSG00000027843|ENSMUSG00000078817|ENSMUSG00000027398|ENSMUSG00000015568|ENSMUSG00000026073|ENSMUSG00000022018|ENSMUSG00000037922	http://amigo.geneontology.org/cgi-bin/amigo/term_details?term=GO:0050707
T cell activation	Gene Ontology	GO:0042110	14	389	0.000760003	0.00837255	ENSMUSG00000020053|ENSMUSG00000030144|ENSMUSG00000005824|ENSMUSG00000048534|ENSMUSG00000030142|ENSMUSG00000076431|ENSMUSG00000003882|ENSMUSG00000031217|ENSMUSG00000056501|ENSMUSG00000025473|ENSMUSG00000027398|ENSMUSG00000027843|ENSMUSG00000053965|ENSMUSG00000024778	http://amigo.geneontology.org/cgi-bin/amigo/term_details?term=GO:0042110
T cell aggregation	Gene Ontology	GO:0070489	14	389	0.000760003	0.00837255	ENSMUSG00000020053|ENSMUSG00000030144|ENSMUSG00000005824|ENSMUSG00000048534|ENSMUSG00000030142|ENSMUSG00000076431|ENSMUSG00000003882|ENSMUSG00000031217|ENSMUSG00000056501|ENSMUSG00000025473|ENSMUSG00000027398|ENSMUSG00000027843|ENSMUSG00000053965|ENSMUSG00000024778	http://amigo.geneontology.org/cgi-bin/amigo/term_details?term=GO:0070489
metal ion homeostasis	Gene Ontology	GO:0055065	16	483	0.000772957	0.00849097	ENSMUSG00000045092|ENSMUSG00000044026|ENSMUSG00000014813|ENSMUSG00000026576|ENSMUSG00000025804|ENSMUSG00000040907|ENSMUSG00000019970|ENSMUSG00000030790|ENSMUSG00000032496|ENSMUSG00000049130|ENSMUSG00000031770|ENSMUSG00000019768|ENSMUSG00000027398|ENSMUSG00000031762|ENSMUSG00000026180|ENSMUSG00000031765	http://amigo.geneontology.org/cgi-bin/amigo/term_details?term=GO:0055065
insulin secretion	Gene Ontology	GO:0030073	9	180	0.000773925	0.00849097	ENSMUSG00000035828|ENSMUSG00000026981|ENSMUSG00000076431|ENSMUSG00000026473|ENSMUSG00000041794|ENSMUSG00000055116|ENSMUSG00000027398|ENSMUSG00000020848|ENSMUSG00000033685	http://amigo.geneontology.org/cgi-bin/amigo/term_details?term=GO:0030073
lymphocyte aggregation	Gene Ontology	GO:0071593	14	390	0.0007784	0.00852261	ENSMUSG00000020053|ENSMUSG00000030144|ENSMUSG00000005824|ENSMUSG00000048534|ENSMUSG00000030142|ENSMUSG00000076431|ENSMUSG00000003882|ENSMUSG00000031217|ENSMUSG00000056501|ENSMUSG00000025473|ENSMUSG00000027398|ENSMUSG00000027843|ENSMUSG00000053965|ENSMUSG00000024778	http://amigo.geneontology.org/cgi-bin/amigo/term_details?term=GO:0071593
developmental process involved in reproduction	Gene Ontology	GO:0003006	18	581	0.00078381	0.00856432	ENSMUSG00000020053|ENSMUSG00000048756|ENSMUSG00000010797|ENSMUSG00000027398|ENSMUSG00000007659|ENSMUSG00000052837|ENSMUSG00000030093|ENSMUSG00000046223|ENSMUSG00000054675|ENSMUSG00000030790|ENSMUSG00000053113|ENSMUSG00000019768|ENSMUSG00000038402|ENSMUSG00000060445|ENSMUSG00000021765|ENSMUSG00000053965|ENSMUSG00000009628|ENSMUSG00000056501	http://amigo.geneontology.org/cgi-bin/amigo/term_details?term=GO:0003006
muscle adaptation	Gene Ontology	GO:0043500	6	79	0.000787922	0.00858046	ENSMUSG00000020053|ENSMUSG00000057604|ENSMUSG00000030087|ENSMUSG00000005124|ENSMUSG00000028967|ENSMUSG00000053965	http://amigo.geneontology.org/cgi-bin/amigo/term_details?term=GO:0043500
regulation of interleukin-6 production	Gene Ontology	GO:0032675	7	110	0.000788492	0.00858046	ENSMUSG00000027947|ENSMUSG00000027843|ENSMUSG00000056501|ENSMUSG00000078817|ENSMUSG00000027398|ENSMUSG00000034641|ENSMUSG00000037922	http://amigo.geneontology.org/cgi-bin/amigo/term_details?term=GO:0032675
cytoplasmic sequestering of protein	Gene Ontology	GO:0051220	4	29	0.000805851	0.00873813	ENSMUSG00000021025|ENSMUSG00000078817|ENSMUSG00000000628|ENSMUSG00000005824	http://amigo.geneontology.org/cgi-bin/amigo/term_details?term=GO:0051220
innate immune response	Gene Ontology	GO:0045087	16	485	0.000806245	0.00873813	ENSMUSG00000030144|ENSMUSG00000056054|ENSMUSG00000030142|ENSMUSG00000027843|ENSMUSG00000025804|ENSMUSG00000056071|ENSMUSG00000033777|ENSMUSG00000032661|ENSMUSG00000027483|ENSMUSG00000019768|ENSMUSG00000025473|ENSMUSG00000021025|ENSMUSG00000017707|ENSMUSG00000032496|ENSMUSG00000025330|ENSMUSG00000019122	http://amigo.geneontology.org/cgi-bin/amigo/term_details?term=GO:0045087
negative regulation of phosphorylation	Gene Ontology	GO:0042326	14	392	0.000816327	0.00881172	ENSMUSG00000020053|ENSMUSG00000024066|ENSMUSG00000027843|ENSMUSG00000078817|ENSMUSG00000023067|ENSMUSG00000020427|ENSMUSG00000024190|ENSMUSG00000028967|ENSMUSG00000026628|ENSMUSG00000053113|ENSMUSG00000061718|ENSMUSG00000027398|ENSMUSG00000020108|ENSMUSG00000020893	http://amigo.geneontology.org/cgi-bin/amigo/term_details?term=GO:0042326
transcription, DNA-templated	Gene Ontology	GO:0006351	54	2681	0.000826647	0.00890517	ENSMUSG00000045092|ENSMUSG00000030093|ENSMUSG00000028211|ENSMUSG00000049892|ENSMUSG00000024042|ENSMUSG00000061718|ENSMUSG00000058755|ENSMUSG00000038402|ENSMUSG00000055116|ENSMUSG00000038342|ENSMUSG00000027513|ENSMUSG00000025330|ENSMUSG00000048756|ENSMUSG00000052837|ENSMUSG00000043099|ENSMUSG00000031431|ENSMUSG00000045730|ENSMUSG00000047146|ENSMUSG00000035456|ENSMUSG00000023034|ENSMUSG00000037447|…	http://amigo.geneontology.org/cgi-bin/amigo/term_details?term=GO:0006351
cellular biosynthetic process	Gene Ontology	GO:0044249	80	4393	0.000833579	0.00896181	ENSMUSG00000045092|ENSMUSG00000025789|ENSMUSG00000031431|ENSMUSG00000030074|ENSMUSG00000028211|ENSMUSG00000064120|ENSMUSG00000049892|ENSMUSG00000030790|ENSMUSG00000060063|ENSMUSG00000058755|ENSMUSG00000038402|ENSMUSG00000055116|ENSMUSG00000038342|ENSMUSG00000027513|ENSMUSG00000015568|ENSMUSG00000030093|ENSMUSG00000025330|ENSMUSG00000033685|ENSMUSG00000021886|ENSMUSG00000048756|ENSMUSG00000030087|…	http://amigo.geneontology.org/cgi-bin/amigo/term_details?term=GO:0044249
nucleic acid-templated transcription	Gene Ontology	GO:0097659	54	2684	0.000847879	0.00909728	ENSMUSG00000045092|ENSMUSG00000030093|ENSMUSG00000028211|ENSMUSG00000049892|ENSMUSG00000024042|ENSMUSG00000061718|ENSMUSG00000058755|ENSMUSG00000038402|ENSMUSG00000055116|ENSMUSG00000038342|ENSMUSG00000027513|ENSMUSG00000025330|ENSMUSG00000048756|ENSMUSG00000052837|ENSMUSG00000043099|ENSMUSG00000031431|ENSMUSG00000045730|ENSMUSG00000047146|ENSMUSG00000035456|ENSMUSG00000023034|ENSMUSG00000037447|…	http://amigo.geneontology.org/cgi-bin/amigo/term_details?term=GO:0097659
cellular response to extracellular stimulus	Gene Ontology	GO:0031668	8	146	0.000859047	0.00919867	ENSMUSG00000027513|ENSMUSG00000026473|ENSMUSG00000021250|ENSMUSG00000017737|ENSMUSG00000023067|ENSMUSG00000002289|ENSMUSG00000026628|ENSMUSG00000019577	http://amigo.geneontology.org/cgi-bin/amigo/term_details?term=GO:0031668
leukocyte differentiation	Gene Ontology	GO:0002521	15	441	0.00086742	0.0092698	ENSMUSG00000058818|ENSMUSG00000030144|ENSMUSG00000047798|ENSMUSG00000027843|ENSMUSG00000030142|ENSMUSG00000025804|ENSMUSG00000003882|ENSMUSG00000021250|ENSMUSG00000076431|ENSMUSG00000086564|ENSMUSG00000056501|ENSMUSG00000025473|ENSMUSG00000052837|ENSMUSG00000027398|ENSMUSG00000024778	http://amigo.geneontology.org/cgi-bin/amigo/term_details?term=GO:0002521
positive regulation of ossification	Gene Ontology	GO:0045778	6	81	0.000890593	0.00947959	ENSMUSG00000020053|ENSMUSG00000032496|ENSMUSG00000045730|ENSMUSG00000056501|ENSMUSG00000054675|ENSMUSG00000063632	http://amigo.geneontology.org/cgi-bin/amigo/term_details?term=GO:0045778
bone remodeling	Gene Ontology	GO:0046849	6	81	0.000890593	0.00947959	ENSMUSG00000024066|ENSMUSG00000045092|ENSMUSG00000025473|ENSMUSG00000045730|ENSMUSG00000029304|ENSMUSG00000019577	http://amigo.geneontology.org/cgi-bin/amigo/term_details?term=GO:0046849
triglyceride biosynthetic process	Gene Ontology	GO:0019432	4	30	0.000904166	0.00958595	ENSMUSG00000027513|ENSMUSG00000024042|ENSMUSG00000015568|ENSMUSG00000020593	http://amigo.geneontology.org/cgi-bin/amigo/term_details?term=GO:0019432
p38MAPK cascade	Gene Ontology	GO:0038066	4	30	0.000904166	0.00958595	ENSMUSG00000024066|ENSMUSG00000044786|ENSMUSG00000020893|ENSMUSG00000027843	http://amigo.geneontology.org/cgi-bin/amigo/term_details?term=GO:0038066
leukocyte activation	Gene Ontology	GO:0045321	19	640	0.000921948	0.00975515	ENSMUSG00000020053|ENSMUSG00000058818|ENSMUSG00000005824|ENSMUSG00000030142|ENSMUSG00000048534|ENSMUSG00000076431|ENSMUSG00000003882|ENSMUSG00000023067|ENSMUSG00000031217|ENSMUSG00000056501|ENSMUSG00000027843|ENSMUSG00000025473|ENSMUSG00000030144|ENSMUSG00000027398|ENSMUSG00000053965|ENSMUSG00000026180|ENSMUSG00000063632|ENSMUSG00000024778|ENSMUSG00000037922	http://amigo.geneontology.org/cgi-bin/amigo/term_details?term=GO:0045321
integral component of plasma membrane	Gene Ontology	GO:0005887	26	1013	0.000938987	0.00991585	ENSMUSG00000057123|ENSMUSG00000045613|ENSMUSG00000030351|ENSMUSG00000029321|ENSMUSG00000003153|ENSMUSG00000026576|ENSMUSG00000032204|ENSMUSG00000033998|ENSMUSG00000040907|ENSMUSG00000046223|ENSMUSG00000045730|ENSMUSG00000038178|ENSMUSG00000030495|ENSMUSG00000040451|ENSMUSG00000005320|ENSMUSG00000024778|ENSMUSG00000027947|ENSMUSG00000028655|ENSMUSG00000022464|ENSMUSG00000022180|ENSMUSG00000025473|…	http://amigo.geneontology.org/cgi-bin/amigo/term_details?term=GO:0005887
RNA biosynthetic process	Gene Ontology	GO:0032774	54	2697	0.000945621	0.00996625	ENSMUSG00000045092|ENSMUSG00000030093|ENSMUSG00000028211|ENSMUSG00000049892|ENSMUSG00000024042|ENSMUSG00000061718|ENSMUSG00000058755|ENSMUSG00000038402|ENSMUSG00000055116|ENSMUSG00000038342|ENSMUSG00000027513|ENSMUSG00000025330|ENSMUSG00000048756|ENSMUSG00000052837|ENSMUSG00000043099|ENSMUSG00000031431|ENSMUSG00000045730|ENSMUSG00000047146|ENSMUSG00000035456|ENSMUSG00000023034|ENSMUSG00000037447|…	http://amigo.geneontology.org/cgi-bin/amigo/term_details?term=GO:0032774
regulation of hemopoiesis	Gene Ontology	GO:1903706	12	309	0.000956372	0.0100598	ENSMUSG00000048756|ENSMUSG00000025804|ENSMUSG00000003882|ENSMUSG00000021250|ENSMUSG00000086564|ENSMUSG00000044786|ENSMUSG00000056501|ENSMUSG00000025473|ENSMUSG00000021025|ENSMUSG00000027398|ENSMUSG00000028859|ENSMUSG00000024778	http://amigo.geneontology.org/cgi-bin/amigo/term_details?term=GO:1903706
regulation of nucleocytoplasmic transport	Gene Ontology	GO:0046822	9	186	0.000965301	0.0101338	ENSMUSG00000020053|ENSMUSG00000027843|ENSMUSG00000076431|ENSMUSG00000023067|ENSMUSG00000078817|ENSMUSG00000021025|ENSMUSG00000027398|ENSMUSG00000005824|ENSMUSG00000061878	http://amigo.geneontology.org/cgi-bin/amigo/term_details?term=GO:0046822
hemopoiesis	Gene Ontology	GO:0030097	20	694	0.000967716	0.0101392	ENSMUSG00000058818|ENSMUSG00000030144|ENSMUSG00000047798|ENSMUSG00000048756|ENSMUSG00000027843|ENSMUSG00000030142|ENSMUSG00000025804|ENSMUSG00000003882|ENSMUSG00000021250|ENSMUSG00000076431|ENSMUSG00000052837|ENSMUSG00000086564|ENSMUSG00000044786|ENSMUSG00000056501|ENSMUSG00000025473|ENSMUSG00000021025|ENSMUSG00000027398|ENSMUSG00000028859|ENSMUSG00000024778|ENSMUSG00000021765	http://amigo.geneontology.org/cgi-bin/amigo/term_details?term=GO:0030097
negative regulation of cell activation	Gene Ontology	GO:0050866	8	149	0.000973505	0.0101601	ENSMUSG00000027843|ENSMUSG00000025473|ENSMUSG00000063632|ENSMUSG00000056501|ENSMUSG00000037922|ENSMUSG00000045730|ENSMUSG00000053965|ENSMUSG00000024778	http://amigo.geneontology.org/cgi-bin/amigo/term_details?term=GO:0050866
regulation of insulin secretion	Gene Ontology	GO:0050796	8	149	0.000973505	0.0101601	ENSMUSG00000035828|ENSMUSG00000076431|ENSMUSG00000026473|ENSMUSG00000041794|ENSMUSG00000055116|ENSMUSG00000027398|ENSMUSG00000020848|ENSMUSG00000033685	http://amigo.geneontology.org/cgi-bin/amigo/term_details?term=GO:0050796
learning or memory	Gene Ontology	GO:0007611	10	226	0.000986016	0.0102707	ENSMUSG00000020053|ENSMUSG00000026981|ENSMUSG00000040907|ENSMUSG00000020423|ENSMUSG00000019970|ENSMUSG00000047250|ENSMUSG00000045730|ENSMUSG00000061718|ENSMUSG00000027398|ENSMUSG00000053965	http://amigo.geneontology.org/cgi-bin/amigo/term_details?term=GO:0007611
regulation of biosynthetic process	Gene Ontology	GO:0009889	62	3219	0.000989749	0.0102895	ENSMUSG00000045092|ENSMUSG00000030093|ENSMUSG00000028211|ENSMUSG00000049892|ENSMUSG00000030790|ENSMUSG00000056501|ENSMUSG00000058755|ENSMUSG00000038402|ENSMUSG00000055116|ENSMUSG00000038342|ENSMUSG00000027513|ENSMUSG00000025330|ENSMUSG00000019577|ENSMUSG00000021886|ENSMUSG00000048756|ENSMUSG00000030087|ENSMUSG00000052837|ENSMUSG00000043099|ENSMUSG00000031431|ENSMUSG00000045730|ENSMUSG00000047146|…	http://amigo.geneontology.org/cgi-bin/amigo/term_details?term=GO:0009889
lymphocyte activation	Gene Ontology	GO:0046649	17	544	0.00099477	0.0103217	ENSMUSG00000020053|ENSMUSG00000030144|ENSMUSG00000005824|ENSMUSG00000030142|ENSMUSG00000048534|ENSMUSG00000076431|ENSMUSG00000003882|ENSMUSG00000023067|ENSMUSG00000031217|ENSMUSG00000056501|ENSMUSG00000025473|ENSMUSG00000053965|ENSMUSG00000027398|ENSMUSG00000027843|ENSMUSG00000063632|ENSMUSG00000024778|ENSMUSG00000037922	http://amigo.geneontology.org/cgi-bin/amigo/term_details?term=GO:0046649
cellular divalent inorganic cation homeostasis	Gene Ontology	GO:0072503	13	355	0.000999005	0.0103456	ENSMUSG00000045092|ENSMUSG00000044026|ENSMUSG00000014813|ENSMUSG00000026576|ENSMUSG00000025804|ENSMUSG00000030790|ENSMUSG00000049130|ENSMUSG00000031770|ENSMUSG00000019768|ENSMUSG00000027398|ENSMUSG00000031762|ENSMUSG00000026180|ENSMUSG00000031765	http://amigo.geneontology.org/cgi-bin/amigo/term_details?term=GO:0072503
interleukin-6 production	Gene Ontology	GO:0032635	7	115	0.00100887	0.0104229	ENSMUSG00000027947|ENSMUSG00000027843|ENSMUSG00000056501|ENSMUSG00000078817|ENSMUSG00000027398|ENSMUSG00000034641|ENSMUSG00000037922	http://amigo.geneontology.org/cgi-bin/amigo/term_details?term=GO:0032635
fat-soluble vitamin metabolic process	Gene Ontology	GO:0006775	4	31	0.00101063	0.0104229	ENSMUSG00000005320|ENSMUSG00000027398|ENSMUSG00000003484|ENSMUSG00000028003	http://amigo.geneontology.org/cgi-bin/amigo/term_details?term=GO:0006775
core promoter binding	Gene Ontology	GO:0001047	8	150	0.00101426	0.0104229	ENSMUSG00000048756|ENSMUSG00000076431|ENSMUSG00000021250|ENSMUSG00000056749|ENSMUSG00000019768|ENSMUSG00000055116|ENSMUSG00000063632|ENSMUSG00000056501	http://amigo.geneontology.org/cgi-bin/amigo/term_details?term=GO:0001047
regulation of reactive oxygen species metabolic process	Gene Ontology	GO:2000377	8	150	0.00101426	0.0104229	ENSMUSG00000020053|ENSMUSG00000024066|ENSMUSG00000048756|ENSMUSG00000028194|ENSMUSG00000078566|ENSMUSG00000023067|ENSMUSG00000000628|ENSMUSG00000027398	http://amigo.geneontology.org/cgi-bin/amigo/term_details?term=GO:2000377
cell-cell adhesion	Gene Ontology	GO:0098609	23	856	0.00102909	0.0105013	ENSMUSG00000030144|ENSMUSG00000056501|ENSMUSG00000056071|ENSMUSG00000005824|ENSMUSG00000053965|ENSMUSG00000027843|ENSMUSG00000045730|ENSMUSG00000022018|ENSMUSG00000020053|ENSMUSG00000030142|ENSMUSG00000076431|ENSMUSG00000026981|ENSMUSG00000031217|ENSMUSG00000046743|ENSMUSG00000050505|ENSMUSG00000027398|ENSMUSG00000056054|ENSMUSG00000048534|ENSMUSG00000025473|ENSMUSG00000027737|ENSMUSG00000024778|…	http://amigo.geneontology.org/cgi-bin/amigo/term_details?term=GO:0098609
positive regulation of cardiac muscle cell apoptotic process	Gene Ontology	GO:0010666	3	13	0.00102974	0.0105013	ENSMUSG00000026180|ENSMUSG00000078566|ENSMUSG00000020427	http://amigo.geneontology.org/cgi-bin/amigo/term_details?term=GO:0010666
positive regulation of striated muscle cell apoptotic process	Gene Ontology	GO:0010663	3	13	0.00102974	0.0105013	ENSMUSG00000026180|ENSMUSG00000078566|ENSMUSG00000020427	http://amigo.geneontology.org/cgi-bin/amigo/term_details?term=GO:0010663
long-chain fatty acid binding	Gene Ontology	GO:0036041	3	13	0.00102974	0.0105013	ENSMUSG00000056071|ENSMUSG00000056054|ENSMUSG00000060063	http://amigo.geneontology.org/cgi-bin/amigo/term_details?term=GO:0036041
cation homeostasis	Gene Ontology	GO:0055080	17	546	0.00103384	0.0105148	ENSMUSG00000045092|ENSMUSG00000044026|ENSMUSG00000014813|ENSMUSG00000026576|ENSMUSG00000025804|ENSMUSG00000040907|ENSMUSG00000019970|ENSMUSG00000030790|ENSMUSG00000032496|ENSMUSG00000049130|ENSMUSG00000031770|ENSMUSG00000019768|ENSMUSG00000027398|ENSMUSG00000031762|ENSMUSG00000026180|ENSMUSG00000031765|ENSMUSG00000019577	http://amigo.geneontology.org/cgi-bin/amigo/term_details?term=GO:0055080
transcriptional activator activity, RNA polymerase II transcription regulatory region sequence-specific binding	Gene Ontology	GO:0001228	12	312	0.00103582	0.0105148	ENSMUSG00000048756|ENSMUSG00000076431|ENSMUSG00000021250|ENSMUSG00000052837|ENSMUSG00000036144|ENSMUSG00000023034|ENSMUSG00000019768|ENSMUSG00000038402|ENSMUSG00000055116|ENSMUSG00000042622|ENSMUSG00000063632|ENSMUSG00000056501	http://amigo.geneontology.org/cgi-bin/amigo/term_details?term=GO:0001228
rhythmic process	Gene Ontology	GO:0048511	11	269	0.00103695	0.0105148	ENSMUSG00000020053|ENSMUSG00000048756|ENSMUSG00000024042|ENSMUSG00000026077|ENSMUSG00000056749|ENSMUSG00000019768|ENSMUSG00000007659|ENSMUSG00000055116|ENSMUSG00000020893|ENSMUSG00000024778|ENSMUSG00000056501	http://amigo.geneontology.org/cgi-bin/amigo/term_details?term=GO:0048511
cell surface	Gene Ontology	GO:0009986	20	699	0.00105258	0.0106531	ENSMUSG00000045092|ENSMUSG00000030474|ENSMUSG00000027656|ENSMUSG00000027947|ENSMUSG00000079018|ENSMUSG00000025804|ENSMUSG00000025473|ENSMUSG00000004609|ENSMUSG00000030093|ENSMUSG00000028128|ENSMUSG00000026581|ENSMUSG00000027737|ENSMUSG00000033453|ENSMUSG00000038264|ENSMUSG00000032496|ENSMUSG00000003882|ENSMUSG00000015568|ENSMUSG00000026180|ENSMUSG00000049130|ENSMUSG00000024778	http://amigo.geneontology.org/cgi-bin/amigo/term_details?term=GO:0009986
response to starvation	Gene Ontology	GO:0042594	7	116	0.00105825	0.0106702	ENSMUSG00000027513|ENSMUSG00000026473|ENSMUSG00000023067|ENSMUSG00000002289|ENSMUSG00000026628|ENSMUSG00000044786|ENSMUSG00000019577	http://amigo.geneontology.org/cgi-bin/amigo/term_details?term=GO:0042594
positive regulation of protein localization to nucleus	Gene Ontology	GO:1900182	7	116	0.00105825	0.0106702	ENSMUSG00000020053|ENSMUSG00000028893|ENSMUSG00000027843|ENSMUSG00000078817|ENSMUSG00000027398|ENSMUSG00000005824|ENSMUSG00000061878	http://amigo.geneontology.org/cgi-bin/amigo/term_details?term=GO:1900182
cellular response to metal ion	Gene Ontology	GO:0071248	6	84	0.00106356	0.0106835	ENSMUSG00000052837|ENSMUSG00000021250|ENSMUSG00000078566|ENSMUSG00000060063|ENSMUSG00000024778|ENSMUSG00000031765	http://amigo.geneontology.org/cgi-bin/amigo/term_details?term=GO:0071248
multicellular organism metabolic process	Gene Ontology	GO:0044236	6	84	0.00106356	0.0106835	ENSMUSG00000000901|ENSMUSG00000017737|ENSMUSG00000045730|ENSMUSG00000028967|ENSMUSG00000005800|ENSMUSG00000022018	http://amigo.geneontology.org/cgi-bin/amigo/term_details?term=GO:0044236
negative regulation of neuron death	Gene Ontology	GO:1901215	9	189	0.00107446	0.0107728	ENSMUSG00000020053|ENSMUSG00000020423|ENSMUSG00000007659|ENSMUSG00000049130|ENSMUSG00000019768|ENSMUSG00000025473|ENSMUSG00000049001|ENSMUSG00000031765|ENSMUSG00000056501	http://amigo.geneontology.org/cgi-bin/amigo/term_details?term=GO:1901215
regulation of lipid metabolic process	Gene Ontology	GO:0019216	11	271	0.00109812	0.0109863	ENSMUSG00000020053|ENSMUSG00000024042|ENSMUSG00000045730|ENSMUSG00000002289|ENSMUSG00000057074|ENSMUSG00000019768|ENSMUSG00000045502|ENSMUSG00000005320|ENSMUSG00000027398|ENSMUSG00000025509|ENSMUSG00000019577	http://amigo.geneontology.org/cgi-bin/amigo/term_details?term=GO:0019216
regulation of protein import into nucleus	Gene Ontology	GO:0042306	8	152	0.00109986	0.0109863	ENSMUSG00000020053|ENSMUSG00000027843|ENSMUSG00000023067|ENSMUSG00000078817|ENSMUSG00000021025|ENSMUSG00000027398|ENSMUSG00000005824|ENSMUSG00000061878	http://amigo.geneontology.org/cgi-bin/amigo/term_details?term=GO:0042306
biomineral tissue development	Gene Ontology	GO:0031214	7	117	0.0011095	0.011062	ENSMUSG00000020053|ENSMUSG00000045092|ENSMUSG00000037962|ENSMUSG00000025804|ENSMUSG00000045730|ENSMUSG00000029304|ENSMUSG00000054675	http://amigo.geneontology.org/cgi-bin/amigo/term_details?term=GO:0031214
carboxylic acid transmembrane transport	Gene Ontology	GO:1905039	4	32	0.0011256	0.0111493	ENSMUSG00000027737|ENSMUSG00000030495|ENSMUSG00000022464|ENSMUSG00000022180	http://amigo.geneontology.org/cgi-bin/amigo/term_details?term=GO:1905039
organic acid transmembrane transport	Gene Ontology	GO:1903825	4	32	0.0011256	0.0111493	ENSMUSG00000027737|ENSMUSG00000030495|ENSMUSG00000022464|ENSMUSG00000022180	http://amigo.geneontology.org/cgi-bin/amigo/term_details?term=GO:1903825
negative regulation of TOR signaling	Gene Ontology	GO:0032007	4	32	0.0011256	0.0111493	ENSMUSG00000055116|ENSMUSG00000038332|ENSMUSG00000028893|ENSMUSG00000020108	http://amigo.geneontology.org/cgi-bin/amigo/term_details?term=GO:0032007
cellular response to oxygen levels	Gene Ontology	GO:0071453	6	85	0.00112659	0.0111493	ENSMUSG00000025473|ENSMUSG00000078566|ENSMUSG00000045730|ENSMUSG00000049001|ENSMUSG00000022018|ENSMUSG00000024778	http://amigo.geneontology.org/cgi-bin/amigo/term_details?term=GO:0071453
enzyme inhibitor activity	Gene Ontology	GO:0004857	12	317	0.00118041	0.0116604	ENSMUSG00000051748|ENSMUSG00000032484|ENSMUSG00000023067|ENSMUSG00000056602|ENSMUSG00000079012|ENSMUSG00000005824|ENSMUSG00000053113|ENSMUSG00000061718|ENSMUSG00000007659|ENSMUSG00000057719|ENSMUSG00000066361|ENSMUSG00000002289	http://amigo.geneontology.org/cgi-bin/amigo/term_details?term=GO:0004857
negative regulation of ERK1 and ERK2 cascade	Gene Ontology	GO:0070373	5	57	0.00118918	0.0117144	ENSMUSG00000020053|ENSMUSG00000028967|ENSMUSG00000026628|ENSMUSG00000024190|ENSMUSG00000078817	http://amigo.geneontology.org/cgi-bin/amigo/term_details?term=GO:0070373
regulation of protein import	Gene Ontology	GO:1904589	8	154	0.00119114	0.0117144	ENSMUSG00000020053|ENSMUSG00000027843|ENSMUSG00000023067|ENSMUSG00000078817|ENSMUSG00000021025|ENSMUSG00000027398|ENSMUSG00000005824|ENSMUSG00000061878	http://amigo.geneontology.org/cgi-bin/amigo/term_details?term=GO:1904589
osteoclast differentiation	Gene Ontology	GO:0030316	6	86	0.00119244	0.0117144	ENSMUSG00000047798|ENSMUSG00000052837|ENSMUSG00000025473|ENSMUSG00000021250|ENSMUSG00000025804|ENSMUSG00000056501	http://amigo.geneontology.org/cgi-bin/amigo/term_details?term=GO:0030316
cellular response to organonitrogen compound	Gene Ontology	GO:0071417	12	318	0.00121125	0.0118774	ENSMUSG00000020053|ENSMUSG00000038332|ENSMUSG00000028893|ENSMUSG00000027843|ENSMUSG00000019970|ENSMUSG00000053113|ENSMUSG00000023034|ENSMUSG00000056501|ENSMUSG00000007659|ENSMUSG00000027398|ENSMUSG00000020593|ENSMUSG00000019577	http://amigo.geneontology.org/cgi-bin/amigo/term_details?term=GO:0071417
positive regulation of T cell differentiation in thymus	Gene Ontology	GO:0033089	3	14	0.00123859	0.0120571	ENSMUSG00000003882|ENSMUSG00000027398|ENSMUSG00000025473	http://amigo.geneontology.org/cgi-bin/amigo/term_details?term=GO:0033089
cytoplasmic sequestering of transcription factor	Gene Ontology	GO:0042994	3	14	0.00123859	0.0120571	ENSMUSG00000021025|ENSMUSG00000078817|ENSMUSG00000005824	http://amigo.geneontology.org/cgi-bin/amigo/term_details?term=GO:0042994
sequestering of triglyceride	Gene Ontology	GO:0030730	3	14	0.00123859	0.0120571	ENSMUSG00000027398|ENSMUSG00000015568|ENSMUSG00000025509	http://amigo.geneontology.org/cgi-bin/amigo/term_details?term=GO:0030730
positive regulation of thymocyte aggregation	Gene Ontology	GO:2000400	3	14	0.00123859	0.0120571	ENSMUSG00000003882|ENSMUSG00000027398|ENSMUSG00000025473	http://amigo.geneontology.org/cgi-bin/amigo/term_details?term=GO:2000400
acylglycerol biosynthetic process	Gene Ontology	GO:0046463	4	33	0.00124944	0.0121186	ENSMUSG00000027513|ENSMUSG00000024042|ENSMUSG00000015568|ENSMUSG00000020593	http://amigo.geneontology.org/cgi-bin/amigo/term_details?term=GO:0046463
neutral lipid biosynthetic process	Gene Ontology	GO:0046460	4	33	0.00124944	0.0121186	ENSMUSG00000027513|ENSMUSG00000024042|ENSMUSG00000015568|ENSMUSG00000020593	http://amigo.geneontology.org/cgi-bin/amigo/term_details?term=GO:0046460
positive regulation of protein import into nucleus	Gene Ontology	GO:0042307	6	87	0.0012612	0.0122106	ENSMUSG00000020053|ENSMUSG00000027843|ENSMUSG00000078817|ENSMUSG00000027398|ENSMUSG00000005824|ENSMUSG00000061878	http://amigo.geneontology.org/cgi-bin/amigo/term_details?term=GO:0042307
positive regulation of establishment of protein localization	Gene Ontology	GO:1904951	15	459	0.00127467	0.0123188	ENSMUSG00000020053|ENSMUSG00000005824|ENSMUSG00000030142|ENSMUSG00000027843|ENSMUSG00000076431|ENSMUSG00000026473|ENSMUSG00000024521|ENSMUSG00000041794|ENSMUSG00000045502|ENSMUSG00000078817|ENSMUSG00000027398|ENSMUSG00000015568|ENSMUSG00000020848|ENSMUSG00000022018|ENSMUSG00000061878	http://amigo.geneontology.org/cgi-bin/amigo/term_details?term=GO:1904951
activation of cysteine-type endopeptidase activity involved in apoptotic process	Gene Ontology	GO:0006919	5	58	0.00127835	0.0123321	ENSMUSG00000024066|ENSMUSG00000056071|ENSMUSG00000056054|ENSMUSG00000028128|ENSMUSG00000024521	http://amigo.geneontology.org/cgi-bin/amigo/term_details?term=GO:0006919
monovalent inorganic cation transport	Gene Ontology	GO:0015672	13	366	0.00130199	0.012515	ENSMUSG00000057123|ENSMUSG00000026576|ENSMUSG00000033998|ENSMUSG00000040907|ENSMUSG00000024042|ENSMUSG00000019970|ENSMUSG00000027483|ENSMUSG00000045730|ENSMUSG00000029321|ENSMUSG00000047330|ENSMUSG00000078532|ENSMUSG00000022464|ENSMUSG00000020893	http://amigo.geneontology.org/cgi-bin/amigo/term_details?term=GO:0015672
regulation of cellular macromolecule biosynthetic process	Gene Ontology	GO:2000112	57	2931	0.0013178	0.0126442	ENSMUSG00000045092|ENSMUSG00000030093|ENSMUSG00000028211|ENSMUSG00000049892|ENSMUSG00000024042|ENSMUSG00000056501|ENSMUSG00000058755|ENSMUSG00000038402|ENSMUSG00000055116|ENSMUSG00000038342|ENSMUSG00000027513|ENSMUSG00000025330|ENSMUSG00000048756|ENSMUSG00000052837|ENSMUSG00000043099|ENSMUSG00000031431|ENSMUSG00000045730|ENSMUSG00000047146|ENSMUSG00000035456|ENSMUSG00000023034|ENSMUSG00000037447|…	http://amigo.geneontology.org/cgi-bin/amigo/term_details?term=GO:2000112
sulfur compound binding	Gene Ontology	GO:1901681	9	195	0.00132277	0.0126692	ENSMUSG00000027656|ENSMUSG00000005124|ENSMUSG00000040907|ENSMUSG00000032496|ENSMUSG00000033453|ENSMUSG00000005320|ENSMUSG00000015568|ENSMUSG00000049001|ENSMUSG00000021765	http://amigo.geneontology.org/cgi-bin/amigo/term_details?term=GO:1901681
metal ion transport	Gene Ontology	GO:0030001	19	661	0.00132606	0.012678	ENSMUSG00000020053|ENSMUSG00000057123|ENSMUSG00000026576|ENSMUSG00000033998|ENSMUSG00000025804|ENSMUSG00000028255|ENSMUSG00000024042|ENSMUSG00000020432|ENSMUSG00000019970|ENSMUSG00000044026|ENSMUSG00000027483|ENSMUSG00000045730|ENSMUSG00000040907|ENSMUSG00000029321|ENSMUSG00000047330|ENSMUSG00000078532|ENSMUSG00000022464|ENSMUSG00000014813|ENSMUSG00000020893	http://amigo.geneontology.org/cgi-bin/amigo/term_details?term=GO:0030001
regulation of epithelial cell differentiation	Gene Ontology	GO:0030856	7	121	0.0013343	0.0127342	ENSMUSG00000024066|ENSMUSG00000028967|ENSMUSG00000044786|ENSMUSG00000046743|ENSMUSG00000055116|ENSMUSG00000027398|ENSMUSG00000042622	http://amigo.geneontology.org/cgi-bin/amigo/term_details?term=GO:0030856
regulation of homeostatic process	Gene Ontology	GO:0032844	14	414	0.00134732	0.0128355	ENSMUSG00000035828|ENSMUSG00000045092|ENSMUSG00000057123|ENSMUSG00000048756|ENSMUSG00000019577|ENSMUSG00000025473|ENSMUSG00000031431|ENSMUSG00000029304|ENSMUSG00000044786|ENSMUSG00000045502|ENSMUSG00000005320|ENSMUSG00000027398|ENSMUSG00000026180|ENSMUSG00000033685	http://amigo.geneontology.org/cgi-bin/amigo/term_details?term=GO:0032844
regulation of protein localization to nucleus	Gene Ontology	GO:1900180	9	196	0.00136832	0.0130124	ENSMUSG00000020053|ENSMUSG00000028893|ENSMUSG00000027843|ENSMUSG00000023067|ENSMUSG00000078817|ENSMUSG00000021025|ENSMUSG00000027398|ENSMUSG00000005824|ENSMUSG00000061878	http://amigo.geneontology.org/cgi-bin/amigo/term_details?term=GO:1900180
regulation of transcription, DNA-templated	Gene Ontology	GO:0006355	52	2617	0.0014017	0.0133062	ENSMUSG00000045092|ENSMUSG00000030093|ENSMUSG00000028211|ENSMUSG00000049892|ENSMUSG00000024042|ENSMUSG00000056501|ENSMUSG00000058755|ENSMUSG00000038402|ENSMUSG00000055116|ENSMUSG00000038342|ENSMUSG00000027513|ENSMUSG00000025330|ENSMUSG00000048756|ENSMUSG00000052837|ENSMUSG00000043099|ENSMUSG00000031431|ENSMUSG00000045730|ENSMUSG00000047146|ENSMUSG00000035456|ENSMUSG00000023034|ENSMUSG00000037447|…	http://amigo.geneontology.org/cgi-bin/amigo/term_details?term=GO:0006355
positive regulation of protein import	Gene Ontology	GO:1904591	6	89	0.00140778	0.013332	ENSMUSG00000020053|ENSMUSG00000027843|ENSMUSG00000078817|ENSMUSG00000027398|ENSMUSG00000005824|ENSMUSG00000061878	http://amigo.geneontology.org/cgi-bin/amigo/term_details?term=GO:1904591
proteolysis	Gene Ontology	GO:0006508	31	1329	0.00140939	0.013332	ENSMUSG00000024066|ENSMUSG00000017737|ENSMUSG00000000901|ENSMUSG00000032484|ENSMUSG00000033508|ENSMUSG00000031770|ENSMUSG00000005800|ENSMUSG00000078817|ENSMUSG00000055116|ENSMUSG00000046223|ENSMUSG00000079012|ENSMUSG00000033453|ENSMUSG00000032437|ENSMUSG00000023034|ENSMUSG00000005320|ENSMUSG00000039304|ENSMUSG00000020053|ENSMUSG00000028255|ENSMUSG00000032496|ENSMUSG00000042807|ENSMUSG00000027398|…	http://amigo.geneontology.org/cgi-bin/amigo/term_details?term=GO:0006508
regulation of nucleic acid-templated transcription	Gene Ontology	GO:1903506	52	2620	0.00143644	0.0135638	ENSMUSG00000045092|ENSMUSG00000030093|ENSMUSG00000028211|ENSMUSG00000049892|ENSMUSG00000024042|ENSMUSG00000056501|ENSMUSG00000058755|ENSMUSG00000038402|ENSMUSG00000055116|ENSMUSG00000038342|ENSMUSG00000027513|ENSMUSG00000025330|ENSMUSG00000048756|ENSMUSG00000052837|ENSMUSG00000043099|ENSMUSG00000031431|ENSMUSG00000045730|ENSMUSG00000047146|ENSMUSG00000035456|ENSMUSG00000023034|ENSMUSG00000037447|…	http://amigo.geneontology.org/cgi-bin/amigo/term_details?term=GO:1903506
organic substance biosynthetic process	Gene Ontology	GO:1901576	80	4478	0.00145515	0.0137163	ENSMUSG00000045092|ENSMUSG00000025789|ENSMUSG00000031431|ENSMUSG00000030074|ENSMUSG00000028211|ENSMUSG00000064120|ENSMUSG00000049892|ENSMUSG00000030790|ENSMUSG00000040740|ENSMUSG00000060063|ENSMUSG00000058755|ENSMUSG00000038402|ENSMUSG00000055116|ENSMUSG00000038342|ENSMUSG00000027513|ENSMUSG00000015568|ENSMUSG00000030093|ENSMUSG00000025330|ENSMUSG00000033685|ENSMUSG00000021886|ENSMUSG00000048756|…	http://amigo.geneontology.org/cgi-bin/amigo/term_details?term=GO:1901576
positive regulation of osteoblast differentiation	Gene Ontology	GO:0045669	5	60	0.00147138	0.0138292	ENSMUSG00000020053|ENSMUSG00000054675|ENSMUSG00000063632|ENSMUSG00000056501|ENSMUSG00000032496	http://amigo.geneontology.org/cgi-bin/amigo/term_details?term=GO:0045669
leukocyte migration involved in inflammatory response	Gene Ontology	GO:0002523	3	15	0.00147229	0.0138292	ENSMUSG00000056071|ENSMUSG00000056054|ENSMUSG00000025473	http://amigo.geneontology.org/cgi-bin/amigo/term_details?term=GO:0002523
alcohol biosynthetic process	Gene Ontology	GO:0046165	6	90	0.00148577	0.013907	ENSMUSG00000027513|ENSMUSG00000027952|ENSMUSG00000024210|ENSMUSG00000027875|ENSMUSG00000027398|ENSMUSG00000061878	http://amigo.geneontology.org/cgi-bin/amigo/term_details?term=GO:0046165
integrin binding	Gene Ontology	GO:0005178	6	90	0.00148577	0.013907	ENSMUSG00000020053|ENSMUSG00000038264|ENSMUSG00000027656|ENSMUSG00000048534|ENSMUSG00000005124|ENSMUSG00000025473	http://amigo.geneontology.org/cgi-bin/amigo/term_details?term=GO:0005178
enzyme activator activity	Gene Ontology	GO:0008047	13	372	0.00149722	0.0139897	ENSMUSG00000020053|ENSMUSG00000053199|ENSMUSG00000026576|ENSMUSG00000026358|ENSMUSG00000023067|ENSMUSG00000001768|ENSMUSG00000020427|ENSMUSG00000032496|ENSMUSG00000000628|ENSMUSG00000060063|ENSMUSG00000051748|ENSMUSG00000022018|ENSMUSG00000044456	http://amigo.geneontology.org/cgi-bin/amigo/term_details?term=GO:0008047
positive regulation of ERK1 and ERK2 cascade	Gene Ontology	GO:0070374	8	160	0.00150171	0.0140072	ENSMUSG00000038264|ENSMUSG00000027843|ENSMUSG00000025804|ENSMUSG00000049130|ENSMUSG00000019122|ENSMUSG00000005320|ENSMUSG00000027398|ENSMUSG00000019768	http://amigo.geneontology.org/cgi-bin/amigo/term_details?term=GO:0070374
biosynthetic process	Gene Ontology	GO:0009058	81	4552	0.00150796	0.014019	ENSMUSG00000045092|ENSMUSG00000025789|ENSMUSG00000031431|ENSMUSG00000030074|ENSMUSG00000028211|ENSMUSG00000064120|ENSMUSG00000049892|ENSMUSG00000030790|ENSMUSG00000040740|ENSMUSG00000060063|ENSMUSG00000058755|ENSMUSG00000038402|ENSMUSG00000055116|ENSMUSG00000038342|ENSMUSG00000027513|ENSMUSG00000015568|ENSMUSG00000030093|ENSMUSG00000025330|ENSMUSG00000033685|ENSMUSG00000021886|ENSMUSG00000048756|…	http://amigo.geneontology.org/cgi-bin/amigo/term_details?term=GO:0009058
regulation of RNA biosynthetic process	Gene Ontology	GO:2001141	52	2626	0.00150821	0.014019	ENSMUSG00000045092|ENSMUSG00000030093|ENSMUSG00000028211|ENSMUSG00000049892|ENSMUSG00000024042|ENSMUSG00000056501|ENSMUSG00000058755|ENSMUSG00000038402|ENSMUSG00000055116|ENSMUSG00000038342|ENSMUSG00000027513|ENSMUSG00000025330|ENSMUSG00000048756|ENSMUSG00000052837|ENSMUSG00000043099|ENSMUSG00000031431|ENSMUSG00000045730|ENSMUSG00000047146|ENSMUSG00000035456|ENSMUSG00000023034|ENSMUSG00000037447|…	http://amigo.geneontology.org/cgi-bin/amigo/term_details?term=GO:2001141
heparin binding	Gene Ontology	GO:0008201	7	124	0.00152512	0.0141271	ENSMUSG00000027656|ENSMUSG00000005124|ENSMUSG00000033453|ENSMUSG00000032496|ENSMUSG00000005320|ENSMUSG00000015568|ENSMUSG00000049001	http://amigo.geneontology.org/cgi-bin/amigo/term_details?term=GO:0008201
regulation of smooth muscle cell proliferation	Gene Ontology	GO:0048660	7	124	0.00152512	0.0141271	ENSMUSG00000020053|ENSMUSG00000045092|ENSMUSG00000027947|ENSMUSG00000005124|ENSMUSG00000017737|ENSMUSG00000020427|ENSMUSG00000019768	http://amigo.geneontology.org/cgi-bin/amigo/term_details?term=GO:0048660
response to wounding	Gene Ontology	GO:0009611	13	373	0.001532	0.0141664	ENSMUSG00000020053|ENSMUSG00000030093|ENSMUSG00000024529|ENSMUSG00000024063|ENSMUSG00000048534|ENSMUSG00000056071|ENSMUSG00000039109|ENSMUSG00000028128|ENSMUSG00000030790|ENSMUSG00000045730|ENSMUSG00000027737|ENSMUSG00000044786|ENSMUSG00000049001	http://amigo.geneontology.org/cgi-bin/amigo/term_details?term=GO:0009611
bone mineralization	Gene Ontology	GO:0030282	6	91	0.001567	0.0144402	ENSMUSG00000020053|ENSMUSG00000045092|ENSMUSG00000037962|ENSMUSG00000025804|ENSMUSG00000045730|ENSMUSG00000054675	http://amigo.geneontology.org/cgi-bin/amigo/term_details?term=GO:0030282
regulation of macromolecule biosynthetic process	Gene Ontology	GO:0010556	58	3019	0.00157218	0.0144443	ENSMUSG00000045092|ENSMUSG00000030093|ENSMUSG00000028211|ENSMUSG00000049892|ENSMUSG00000024042|ENSMUSG00000056501|ENSMUSG00000058755|ENSMUSG00000038402|ENSMUSG00000055116|ENSMUSG00000038342|ENSMUSG00000027513|ENSMUSG00000025330|ENSMUSG00000048756|ENSMUSG00000052837|ENSMUSG00000043099|ENSMUSG00000031431|ENSMUSG00000045730|ENSMUSG00000047146|ENSMUSG00000035456|ENSMUSG00000023034|ENSMUSG00000037447|…	http://amigo.geneontology.org/cgi-bin/amigo/term_details?term=GO:0010556
gene expression	Gene Ontology	GO:0010467	73	4015	0.00157554	0.0144443	ENSMUSG00000024066|ENSMUSG00000046223|ENSMUSG00000030093|ENSMUSG00000028211|ENSMUSG00000049892|ENSMUSG00000024042|ENSMUSG00000033508|ENSMUSG00000061718|ENSMUSG00000058755|ENSMUSG00000038402|ENSMUSG00000055116|ENSMUSG00000038342|ENSMUSG00000027513|ENSMUSG00000025330|ENSMUSG00000033685|ENSMUSG00000026576|ENSMUSG00000030087|ENSMUSG00000027843|ENSMUSG00000052837|ENSMUSG00000043099|ENSMUSG00000025804|…	http://amigo.geneontology.org/cgi-bin/amigo/term_details?term=GO:0010467
response to glucocorticoid	Gene Ontology	GO:0051384	5	61	0.00157555	0.0144443	ENSMUSG00000020108|ENSMUSG00000026981|ENSMUSG00000044786|ENSMUSG00000019970|ENSMUSG00000024778	http://amigo.geneontology.org/cgi-bin/amigo/term_details?term=GO:0051384
regulation of cell-cell adhesion	Gene Ontology	GO:0022407	12	329	0.00159684	0.0146145	ENSMUSG00000020053|ENSMUSG00000026981|ENSMUSG00000027843|ENSMUSG00000003882|ENSMUSG00000045730|ENSMUSG00000031217|ENSMUSG00000056501|ENSMUSG00000025473|ENSMUSG00000027398|ENSMUSG00000005824|ENSMUSG00000053965|ENSMUSG00000022018	http://amigo.geneontology.org/cgi-bin/amigo/term_details?term=GO:0022407
glucose metabolic process	Gene Ontology	GO:0006006	8	162	0.00161841	0.0147614	ENSMUSG00000020053|ENSMUSG00000027513|ENSMUSG00000028893|ENSMUSG00000024042|ENSMUSG00000026628|ENSMUSG00000020427|ENSMUSG00000000628|ENSMUSG00000019577	http://amigo.geneontology.org/cgi-bin/amigo/term_details?term=GO:0006006
heart contraction	Gene Ontology	GO:0060047	8	162	0.00161841	0.0147614	ENSMUSG00000057123|ENSMUSG00000026576|ENSMUSG00000040907|ENSMUSG00000045613|ENSMUSG00000030790|ENSMUSG00000045730|ENSMUSG00000014813|ENSMUSG00000053965	http://amigo.geneontology.org/cgi-bin/amigo/term_details?term=GO:0060047
regulation of cell activation	Gene Ontology	GO:0050865	14	423	0.00163551	0.014892	ENSMUSG00000020053|ENSMUSG00000027843|ENSMUSG00000003882|ENSMUSG00000023067|ENSMUSG00000045730|ENSMUSG00000031217|ENSMUSG00000056501|ENSMUSG00000025473|ENSMUSG00000053965|ENSMUSG00000027398|ENSMUSG00000005824|ENSMUSG00000063632|ENSMUSG00000024778|ENSMUSG00000037922	http://amigo.geneontology.org/cgi-bin/amigo/term_details?term=GO:0050865
divalent inorganic cation homeostasis	Gene Ontology	GO:0072507	13	376	0.00164041	0.0149113	ENSMUSG00000045092|ENSMUSG00000044026|ENSMUSG00000014813|ENSMUSG00000026576|ENSMUSG00000025804|ENSMUSG00000030790|ENSMUSG00000049130|ENSMUSG00000031770|ENSMUSG00000019768|ENSMUSG00000027398|ENSMUSG00000031762|ENSMUSG00000026180|ENSMUSG00000031765	http://amigo.geneontology.org/cgi-bin/amigo/term_details?term=GO:0072507
amino acid transport	Gene Ontology	GO:0006865	6	92	0.00165157	0.0149873	ENSMUSG00000022464|ENSMUSG00000022180|ENSMUSG00000017707|ENSMUSG00000027737|ENSMUSG00000038178|ENSMUSG00000030495	http://amigo.geneontology.org/cgi-bin/amigo/term_details?term=GO:0006865
interleukin-1 production	Gene Ontology	GO:0032612	5	62	0.00168504	0.0152394	ENSMUSG00000028967|ENSMUSG00000027398|ENSMUSG00000026073|ENSMUSG00000061878|ENSMUSG00000078817	http://amigo.geneontology.org/cgi-bin/amigo/term_details?term=GO:0032612
regulation of muscle adaptation	Gene Ontology	GO:0043502	5	62	0.00168504	0.0152394	ENSMUSG00000020053|ENSMUSG00000028967|ENSMUSG00000053965|ENSMUSG00000005124|ENSMUSG00000057604	http://amigo.geneontology.org/cgi-bin/amigo/term_details?term=GO:0043502
cellular sodium ion homeostasis	Gene Ontology	GO:0006883	3	16	0.00173186	0.0156061	ENSMUSG00000040907|ENSMUSG00000019970|ENSMUSG00000026576	http://amigo.geneontology.org/cgi-bin/amigo/term_details?term=GO:0006883
RNA polymerase II transcription factor activity, sequence-specific DNA binding	Gene Ontology	GO:0000981	17	574	0.00173381	0.0156061	ENSMUSG00000048756|ENSMUSG00000056501|ENSMUSG00000076431|ENSMUSG00000020423|ENSMUSG00000021250|ENSMUSG00000052837|ENSMUSG00000036144|ENSMUSG00000026628|ENSMUSG00000056749|ENSMUSG00000023034|ENSMUSG00000019768|ENSMUSG00000038402|ENSMUSG00000055116|ENSMUSG00000042622|ENSMUSG00000063632|ENSMUSG00000029135|ENSMUSG00000004328	http://amigo.geneontology.org/cgi-bin/amigo/term_details?term=GO:0000981
membrane-bounded organelle	Gene Ontology	GO:0043227	154	9845	0.00173434	0.0156061	ENSMUSG00000049892|ENSMUSG00000058624|ENSMUSG00000031770|ENSMUSG00000024190|ENSMUSG00000057719|ENSMUSG00000045730|ENSMUSG00000019577|ENSMUSG00000003484|ENSMUSG00000027843|ENSMUSG00000052837|ENSMUSG00000040907|ENSMUSG00000020387|ENSMUSG00000042510|ENSMUSG00000048489|ENSMUSG00000063632|ENSMUSG00000020593|ENSMUSG00000027068|ENSMUSG00000020423|ENSMUSG00000024042|ENSMUSG00000019851|ENSMUSG00000032496|…	http://amigo.geneontology.org/cgi-bin/amigo/term_details?term=GO:0043227
positive regulation of protein transport	Gene Ontology	GO:0051222	14	426	0.0017423	0.0156515	ENSMUSG00000020053|ENSMUSG00000005824|ENSMUSG00000030142|ENSMUSG00000027843|ENSMUSG00000076431|ENSMUSG00000026473|ENSMUSG00000041794|ENSMUSG00000045502|ENSMUSG00000078817|ENSMUSG00000027398|ENSMUSG00000015568|ENSMUSG00000020848|ENSMUSG00000022018|ENSMUSG00000061878	http://amigo.geneontology.org/cgi-bin/amigo/term_details?term=GO:0051222
negative regulation of macromolecule biosynthetic process	Gene Ontology	GO:0010558	27	1117	0.00175476	0.015737	ENSMUSG00000049892|ENSMUSG00000056501|ENSMUSG00000038402|ENSMUSG00000055116|ENSMUSG00000052837|ENSMUSG00000043099|ENSMUSG00000031431|ENSMUSG00000047146|ENSMUSG00000044786|ENSMUSG00000020893|ENSMUSG00000020593|ENSMUSG00000048756|ENSMUSG00000027398|ENSMUSG00000020423|ENSMUSG00000024042|ENSMUSG00000057604|ENSMUSG00000056749|ENSMUSG00000078817|ENSMUSG00000028893|ENSMUSG00000063632|ENSMUSG00000024190|…	http://amigo.geneontology.org/cgi-bin/amigo/term_details?term=GO:0010558
cellular cation homeostasis	Gene Ontology	GO:0030003	15	475	0.0017616	0.015772	ENSMUSG00000045092|ENSMUSG00000044026|ENSMUSG00000014813|ENSMUSG00000026576|ENSMUSG00000025804|ENSMUSG00000040907|ENSMUSG00000019970|ENSMUSG00000030790|ENSMUSG00000049130|ENSMUSG00000031770|ENSMUSG00000019768|ENSMUSG00000027398|ENSMUSG00000031762|ENSMUSG00000026180|ENSMUSG00000031765	http://amigo.geneontology.org/cgi-bin/amigo/term_details?term=GO:0030003
lymphocyte migration	Gene Ontology	GO:0072676	5	63	0.00180001	0.0160889	ENSMUSG00000045092|ENSMUSG00000025473|ENSMUSG00000021508|ENSMUSG00000005824|ENSMUSG00000019122	http://amigo.geneontology.org/cgi-bin/amigo/term_details?term=GO:0072676
heart process	Gene Ontology	GO:0003015	8	165	0.0018068	0.0161227	ENSMUSG00000057123|ENSMUSG00000026576|ENSMUSG00000040907|ENSMUSG00000045613|ENSMUSG00000030790|ENSMUSG00000045730|ENSMUSG00000014813|ENSMUSG00000053965	http://amigo.geneontology.org/cgi-bin/amigo/term_details?term=GO:0003015
response to glucose	Gene Ontology	GO:0009749	7	128	0.00181187	0.016141	ENSMUSG00000020053|ENSMUSG00000035828|ENSMUSG00000028893|ENSMUSG00000026480|ENSMUSG00000076431|ENSMUSG00000026473|ENSMUSG00000033685	http://amigo.geneontology.org/cgi-bin/amigo/term_details?term=GO:0009749
nucleic acid binding transcription factor activity	Gene Ontology	GO:0001071	22	841	0.00182492	0.0162033	ENSMUSG00000056501|ENSMUSG00000038402|ENSMUSG00000055116|ENSMUSG00000052837|ENSMUSG00000043099|ENSMUSG00000031431|ENSMUSG00000023034|ENSMUSG00000042622|ENSMUSG00000063632|ENSMUSG00000004328|ENSMUSG00000048756|ENSMUSG00000038342|ENSMUSG00000030087|ENSMUSG00000076431|ENSMUSG00000020423|ENSMUSG00000021250|ENSMUSG00000056749|ENSMUSG00000029135|ENSMUSG00000036144|ENSMUSG00000026628|ENSMUSG00000019768|…	http://amigo.geneontology.org/cgi-bin/amigo/term_details?term=GO:0001071
transcription factor activity, sequence-specific DNA binding	Gene Ontology	GO:0003700	22	841	0.00182492	0.0162033	ENSMUSG00000056501|ENSMUSG00000038402|ENSMUSG00000055116|ENSMUSG00000052837|ENSMUSG00000043099|ENSMUSG00000031431|ENSMUSG00000023034|ENSMUSG00000042622|ENSMUSG00000063632|ENSMUSG00000004328|ENSMUSG00000048756|ENSMUSG00000038342|ENSMUSG00000030087|ENSMUSG00000076431|ENSMUSG00000020423|ENSMUSG00000021250|ENSMUSG00000056749|ENSMUSG00000029135|ENSMUSG00000036144|ENSMUSG00000026628|ENSMUSG00000019768|…	http://amigo.geneontology.org/cgi-bin/amigo/term_details?term=GO:0003700
regulation of anatomical structure morphogenesis	Gene Ontology	GO:0022603	23	896	0.00183055	0.0162264	ENSMUSG00000030093|ENSMUSG00000028128|ENSMUSG00000078566|ENSMUSG00000032484|ENSMUSG00000030790|ENSMUSG00000005824|ENSMUSG00000036144|ENSMUSG00000045730|ENSMUSG00000005320|ENSMUSG00000022018|ENSMUSG00000024066|ENSMUSG00000038264|ENSMUSG00000010797|ENSMUSG00000028194|ENSMUSG00000027398|ENSMUSG00000026180|ENSMUSG00000061878|ENSMUSG00000026981|ENSMUSG00000017737|ENSMUSG00000019970|ENSMUSG00000001227|…	http://amigo.geneontology.org/cgi-bin/amigo/term_details?term=GO:0022603
regulation of endothelial cell apoptotic process	Gene Ontology	GO:2000351	4	37	0.00184052	0.0162879	ENSMUSG00000048756|ENSMUSG00000049001|ENSMUSG00000022018|ENSMUSG00000002289	http://amigo.geneontology.org/cgi-bin/amigo/term_details?term=GO:2000351
smooth muscle cell proliferation	Gene Ontology	GO:0048659	7	129	0.00188969	0.0166954	ENSMUSG00000020053|ENSMUSG00000045092|ENSMUSG00000027947|ENSMUSG00000005124|ENSMUSG00000017737|ENSMUSG00000020427|ENSMUSG00000019768	http://amigo.geneontology.org/cgi-bin/amigo/term_details?term=GO:0048659
blood circulation	Gene Ontology	GO:0008015	13	383	0.00191828	0.0168851	ENSMUSG00000057123|ENSMUSG00000003484|ENSMUSG00000026576|ENSMUSG00000028194|ENSMUSG00000026480|ENSMUSG00000040907|ENSMUSG00000045613|ENSMUSG00000030790|ENSMUSG00000047250|ENSMUSG00000045730|ENSMUSG00000014813|ENSMUSG00000026180|ENSMUSG00000053965	http://amigo.geneontology.org/cgi-bin/amigo/term_details?term=GO:0008015
protein kinase activator activity	Gene Ontology	GO:0030295	5	64	0.00192062	0.0168851	ENSMUSG00000020053|ENSMUSG00000000628|ENSMUSG00000023067|ENSMUSG00000022018|ENSMUSG00000032496	http://amigo.geneontology.org/cgi-bin/amigo/term_details?term=GO:0030295
response to corticosteroid	Gene Ontology	GO:0031960	5	64	0.00192062	0.0168851	ENSMUSG00000020108|ENSMUSG00000026981|ENSMUSG00000044786|ENSMUSG00000019970|ENSMUSG00000024778	http://amigo.geneontology.org/cgi-bin/amigo/term_details?term=GO:0031960
hematopoietic or lymphoid organ development	Gene Ontology	GO:0048534	20	737	0.00193251	0.0169618	ENSMUSG00000058818|ENSMUSG00000030144|ENSMUSG00000047798|ENSMUSG00000048756|ENSMUSG00000027843|ENSMUSG00000030142|ENSMUSG00000025804|ENSMUSG00000003882|ENSMUSG00000021250|ENSMUSG00000076431|ENSMUSG00000052837|ENSMUSG00000086564|ENSMUSG00000044786|ENSMUSG00000056501|ENSMUSG00000025473|ENSMUSG00000021025|ENSMUSG00000027398|ENSMUSG00000028859|ENSMUSG00000024778|ENSMUSG00000021765	http://amigo.geneontology.org/cgi-bin/amigo/term_details?term=GO:0048534
regulation of RNA metabolic process	Gene Ontology	GO:0051252	53	2722	0.00193976	0.0169975	ENSMUSG00000045092|ENSMUSG00000032661|ENSMUSG00000030093|ENSMUSG00000028211|ENSMUSG00000049892|ENSMUSG00000024042|ENSMUSG00000056501|ENSMUSG00000058755|ENSMUSG00000038402|ENSMUSG00000055116|ENSMUSG00000038342|ENSMUSG00000027513|ENSMUSG00000025330|ENSMUSG00000048756|ENSMUSG00000052837|ENSMUSG00000043099|ENSMUSG00000031431|ENSMUSG00000045730|ENSMUSG00000047146|ENSMUSG00000035456|ENSMUSG00000023034|…	http://amigo.geneontology.org/cgi-bin/amigo/term_details?term=GO:0051252
organic acid metabolic process	Gene Ontology	GO:0006082	20	738	0.00196226	0.0171665	ENSMUSG00000020053|ENSMUSG00000027513|ENSMUSG00000003484|ENSMUSG00000028893|ENSMUSG00000029802|ENSMUSG00000028194|ENSMUSG00000015568|ENSMUSG00000047250|ENSMUSG00000020593|ENSMUSG00000005320|ENSMUSG00000000628|ENSMUSG00000072949|ENSMUSG00000060063|ENSMUSG00000027360|ENSMUSG00000020108|ENSMUSG00000027068|ENSMUSG00000026473|ENSMUSG00000025330|ENSMUSG00000061878|ENSMUSG00000019577	http://amigo.geneontology.org/cgi-bin/amigo/term_details?term=GO:0006082
multi-organism cellular process	Gene Ontology	GO:0044764	14	432	0.00197334	0.0172353	ENSMUSG00000032661|ENSMUSG00000026576|ENSMUSG00000042265|ENSMUSG00000027843|ENSMUSG00000033777|ENSMUSG00000017737|ENSMUSG00000078566|ENSMUSG00000027483|ENSMUSG00000057604|ENSMUSG00000017707|ENSMUSG00000007659|ENSMUSG00000020108|ENSMUSG00000032496|ENSMUSG00000019577	http://amigo.geneontology.org/cgi-bin/amigo/term_details?term=GO:0044764
multicellular organismal homeostasis	Gene Ontology	GO:0048871	11	293	0.00199026	0.0173548	ENSMUSG00000024066|ENSMUSG00000045092|ENSMUSG00000026981|ENSMUSG00000025473|ENSMUSG00000027483|ENSMUSG00000045730|ENSMUSG00000029304|ENSMUSG00000005686|ENSMUSG00000027398|ENSMUSG00000009628|ENSMUSG00000019577	http://amigo.geneontology.org/cgi-bin/amigo/term_details?term=GO:0048871
regulation of granulocyte chemotaxis	Gene Ontology	GO:0071622	4	38	0.00201399	0.0174571	ENSMUSG00000027398|ENSMUSG00000026180|ENSMUSG00000026581|ENSMUSG00000049130	http://amigo.geneontology.org/cgi-bin/amigo/term_details?term=GO:0071622
lymphocyte chemotaxis	Gene Ontology	GO:0048247	4	38	0.00201399	0.0174571	ENSMUSG00000025473|ENSMUSG00000021508|ENSMUSG00000005824|ENSMUSG00000019122	http://amigo.geneontology.org/cgi-bin/amigo/term_details?term=GO:0048247
ossification involved in bone maturation	Gene Ontology	GO:0043931	3	17	0.00201829	0.0174571	ENSMUSG00000020053|ENSMUSG00000046743|ENSMUSG00000037962	http://amigo.geneontology.org/cgi-bin/amigo/term_details?term=GO:0043931
bone maturation	Gene Ontology	GO:0070977	3	17	0.00201829	0.0174571	ENSMUSG00000020053|ENSMUSG00000046743|ENSMUSG00000037962	http://amigo.geneontology.org/cgi-bin/amigo/term_details?term=GO:0070977
inflammatory cell apoptotic process	Gene Ontology	GO:0006925	3	17	0.00201829	0.0174571	ENSMUSG00000026180|ENSMUSG00000024778|ENSMUSG00000045502	http://amigo.geneontology.org/cgi-bin/amigo/term_details?term=GO:0006925
signaling receptor activity	Gene Ontology	GO:0038023	23	904	0.00204286	0.0176411	ENSMUSG00000039167|ENSMUSG00000045613|ENSMUSG00000021886|ENSMUSG00000046223|ENSMUSG00000045730|ENSMUSG00000026068|ENSMUSG00000023034|ENSMUSG00000005320|ENSMUSG00000071713|ENSMUSG00000045092|ENSMUSG00000027947|ENSMUSG00000025804|ENSMUSG00000047875|ENSMUSG00000045502|ENSMUSG00000026180|ENSMUSG00000061878|ENSMUSG00000003882|ENSMUSG00000028128|ENSMUSG00000049130|ENSMUSG00000019768|ENSMUSG00000028859|…	http://amigo.geneontology.org/cgi-bin/amigo/term_details?term=GO:0038023
circulatory system process	Gene Ontology	GO:0003013	13	386	0.00204872	0.0176442	ENSMUSG00000057123|ENSMUSG00000003484|ENSMUSG00000026576|ENSMUSG00000028194|ENSMUSG00000026480|ENSMUSG00000040907|ENSMUSG00000045613|ENSMUSG00000030790|ENSMUSG00000047250|ENSMUSG00000045730|ENSMUSG00000014813|ENSMUSG00000026180|ENSMUSG00000053965	http://amigo.geneontology.org/cgi-bin/amigo/term_details?term=GO:0003013
response to hexose	Gene Ontology	GO:0009746	7	131	0.0020531	0.0176442	ENSMUSG00000020053|ENSMUSG00000035828|ENSMUSG00000028893|ENSMUSG00000026480|ENSMUSG00000076431|ENSMUSG00000026473|ENSMUSG00000033685	http://amigo.geneontology.org/cgi-bin/amigo/term_details?term=GO:0009746
negative regulation of cell-cell adhesion	Gene Ontology	GO:0022408	7	131	0.0020531	0.0176442	ENSMUSG00000026981|ENSMUSG00000027843|ENSMUSG00000025473|ENSMUSG00000045730|ENSMUSG00000056501|ENSMUSG00000053965|ENSMUSG00000022018	http://amigo.geneontology.org/cgi-bin/amigo/term_details?term=GO:0022408
cognition	Gene Ontology	GO:0050890	10	251	0.00208243	0.0178564	ENSMUSG00000020053|ENSMUSG00000026981|ENSMUSG00000040907|ENSMUSG00000020423|ENSMUSG00000019970|ENSMUSG00000047250|ENSMUSG00000045730|ENSMUSG00000061718|ENSMUSG00000027398|ENSMUSG00000053965	http://amigo.geneontology.org/cgi-bin/amigo/term_details?term=GO:0050890
cellular response to external stimulus	Gene Ontology	GO:0071496	8	169	0.00208447	0.0178564	ENSMUSG00000027513|ENSMUSG00000026473|ENSMUSG00000021250|ENSMUSG00000017737|ENSMUSG00000023067|ENSMUSG00000002289|ENSMUSG00000026628|ENSMUSG00000019577	http://amigo.geneontology.org/cgi-bin/amigo/term_details?term=GO:0071496
regulation of leukocyte activation	Gene Ontology	GO:0002694	13	387	0.00209379	0.0179076	ENSMUSG00000020053|ENSMUSG00000027843|ENSMUSG00000003882|ENSMUSG00000023067|ENSMUSG00000031217|ENSMUSG00000056501|ENSMUSG00000025473|ENSMUSG00000053965|ENSMUSG00000027398|ENSMUSG00000005824|ENSMUSG00000063632|ENSMUSG00000024778|ENSMUSG00000037922	http://amigo.geneontology.org/cgi-bin/amigo/term_details?term=GO:0002694
peptidyl-amino acid modification	Gene Ontology	GO:0018193	22	852	0.00213226	0.0181764	ENSMUSG00000030350|ENSMUSG00000058755|ENSMUSG00000025330|ENSMUSG00000020387|ENSMUSG00000053113|ENSMUSG00000037447|ENSMUSG00000005320|ENSMUSG00000049001|ENSMUSG00000020053|ENSMUSG00000027947|ENSMUSG00000030087|ENSMUSG00000076431|ENSMUSG00000061878|ENSMUSG00000020893|ENSMUSG00000056054|ENSMUSG00000032437|ENSMUSG00000019970|ENSMUSG00000028967|ENSMUSG00000024222|ENSMUSG00000035456|ENSMUSG00000056071|…	http://amigo.geneontology.org/cgi-bin/amigo/term_details?term=GO:0018193
response to monosaccharide	Gene Ontology	GO:0034284	7	132	0.0021388	0.0181764	ENSMUSG00000020053|ENSMUSG00000035828|ENSMUSG00000028893|ENSMUSG00000026480|ENSMUSG00000076431|ENSMUSG00000026473|ENSMUSG00000033685	http://amigo.geneontology.org/cgi-bin/amigo/term_details?term=GO:0034284
regulation of heart contraction	Gene Ontology	GO:0008016	7	132	0.0021388	0.0181764	ENSMUSG00000057123|ENSMUSG00000026576|ENSMUSG00000045613|ENSMUSG00000030790|ENSMUSG00000045730|ENSMUSG00000014813|ENSMUSG00000053965	http://amigo.geneontology.org/cgi-bin/amigo/term_details?term=GO:0008016
positive regulation of muscle organ development	Gene Ontology	GO:0048636	5	66	0.00217942	0.0184048	ENSMUSG00000020053|ENSMUSG00000055116|ENSMUSG00000010797|ENSMUSG00000005124|ENSMUSG00000045730	http://amigo.geneontology.org/cgi-bin/amigo/term_details?term=GO:0048636
positive regulation of striated muscle tissue development	Gene Ontology	GO:0045844	5	66	0.00217942	0.0184048	ENSMUSG00000020053|ENSMUSG00000055116|ENSMUSG00000010797|ENSMUSG00000005124|ENSMUSG00000045730	http://amigo.geneontology.org/cgi-bin/amigo/term_details?term=GO:0045844
regulation of bone mineralization	Gene Ontology	GO:0030500	5	66	0.00217942	0.0184048	ENSMUSG00000045092|ENSMUSG00000054675|ENSMUSG00000045730|ENSMUSG00000037962|ENSMUSG00000025804	http://amigo.geneontology.org/cgi-bin/amigo/term_details?term=GO:0030500
L-amino acid transmembrane transporter activity	Gene Ontology	GO:0015179	4	39	0.00219844	0.018507	ENSMUSG00000038178|ENSMUSG00000030495|ENSMUSG00000017707|ENSMUSG00000022180	http://amigo.geneontology.org/cgi-bin/amigo/term_details?term=GO:0015179
regulation of bone resorption	Gene Ontology	GO:0045124	4	39	0.00219844	0.018507	ENSMUSG00000045092|ENSMUSG00000029304|ENSMUSG00000025473|ENSMUSG00000019577	http://amigo.geneontology.org/cgi-bin/amigo/term_details?term=GO:0045124
organonitrogen compound metabolic process	Gene Ontology	GO:1901564	35	1609	0.00222106	0.0186031	ENSMUSG00000024066|ENSMUSG00000064120|ENSMUSG00000030790|ENSMUSG00000058624|ENSMUSG00000053965|ENSMUSG00000025330|ENSMUSG00000033685|ENSMUSG00000021886|ENSMUSG00000026576|ENSMUSG00000028194|ENSMUSG00000026473|ENSMUSG00000040740|ENSMUSG00000017707|ENSMUSG00000045730|ENSMUSG00000040451|ENSMUSG00000005686|ENSMUSG00000049001|ENSMUSG00000025789|ENSMUSG00000020053|ENSMUSG00000026480|ENSMUSG00000076431|…	http://amigo.geneontology.org/cgi-bin/amigo/term_details?term=GO:1901564
transcription factor binding	Gene Ontology	GO:0008134	15	487	0.00222134	0.0186031	ENSMUSG00000048756|ENSMUSG00000007659|ENSMUSG00000052837|ENSMUSG00000021250|ENSMUSG00000038402|ENSMUSG00000024042|ENSMUSG00000031431|ENSMUSG00000055116|ENSMUSG00000023034|ENSMUSG00000019768|ENSMUSG00000037447|ENSMUSG00000021025|ENSMUSG00000020893|ENSMUSG00000020593|ENSMUSG00000056501	http://amigo.geneontology.org/cgi-bin/amigo/term_details?term=GO:0008134
cellular ion homeostasis	Gene Ontology	GO:0006873	15	487	0.00222134	0.0186031	ENSMUSG00000045092|ENSMUSG00000044026|ENSMUSG00000014813|ENSMUSG00000026576|ENSMUSG00000025804|ENSMUSG00000040907|ENSMUSG00000019970|ENSMUSG00000030790|ENSMUSG00000049130|ENSMUSG00000031770|ENSMUSG00000019768|ENSMUSG00000027398|ENSMUSG00000031762|ENSMUSG00000026180|ENSMUSG00000031765	http://amigo.geneontology.org/cgi-bin/amigo/term_details?term=GO:0006873
positive regulation of hormone secretion	Gene Ontology	GO:0046887	7	133	0.00222723	0.0186031	ENSMUSG00000076431|ENSMUSG00000026473|ENSMUSG00000063632|ENSMUSG00000041794|ENSMUSG00000045502|ENSMUSG00000005320|ENSMUSG00000020848	http://amigo.geneontology.org/cgi-bin/amigo/term_details?term=GO:0046887
negative regulation of leukocyte activation	Gene Ontology	GO:0002695	7	133	0.00222723	0.0186031	ENSMUSG00000027843|ENSMUSG00000025473|ENSMUSG00000063632|ENSMUSG00000056501|ENSMUSG00000037922|ENSMUSG00000053965|ENSMUSG00000024778	http://amigo.geneontology.org/cgi-bin/amigo/term_details?term=GO:0002695
cellular response to inorganic substance	Gene Ontology	GO:0071241	6	98	0.002234	0.0186306	ENSMUSG00000052837|ENSMUSG00000021250|ENSMUSG00000078566|ENSMUSG00000060063|ENSMUSG00000024778|ENSMUSG00000031765	http://amigo.geneontology.org/cgi-bin/amigo/term_details?term=GO:0071241
cellular response to steroid hormone stimulus	Gene Ontology	GO:0071383	8	172	0.00231394	0.0192672	ENSMUSG00000020053|ENSMUSG00000019970|ENSMUSG00000044786|ENSMUSG00000023034|ENSMUSG00000019768|ENSMUSG00000055116|ENSMUSG00000020108|ENSMUSG00000020893	http://amigo.geneontology.org/cgi-bin/amigo/term_details?term=GO:0071383
positive regulation of muscle tissue development	Gene Ontology	GO:1901863	5	67	0.00231794	0.0192706	ENSMUSG00000020053|ENSMUSG00000055116|ENSMUSG00000010797|ENSMUSG00000005124|ENSMUSG00000045730	http://amigo.geneontology.org/cgi-bin/amigo/term_details?term=GO:1901863
negative regulation of NF-kappaB import into nucleus	Gene Ontology	GO:0042347	3	18	0.0023325	0.0193017	ENSMUSG00000021025|ENSMUSG00000078817|ENSMUSG00000005824	http://amigo.geneontology.org/cgi-bin/amigo/term_details?term=GO:0042347
androgen metabolic process	Gene Ontology	GO:0008209	3	18	0.0023325	0.0193017	ENSMUSG00000030790|ENSMUSG00000019768|ENSMUSG00000027068	http://amigo.geneontology.org/cgi-bin/amigo/term_details?term=GO:0008209
regulation of interleukin-6 biosynthetic process	Gene Ontology	GO:0045408	3	18	0.0023325	0.0193017	ENSMUSG00000027398|ENSMUSG00000056501|ENSMUSG00000078817	http://amigo.geneontology.org/cgi-bin/amigo/term_details?term=GO:0045408
cellular response to starvation	Gene Ontology	GO:0009267	6	99	0.00234442	0.0193704	ENSMUSG00000027513|ENSMUSG00000026473|ENSMUSG00000023067|ENSMUSG00000002289|ENSMUSG00000026628|ENSMUSG00000019577	http://amigo.geneontology.org/cgi-bin/amigo/term_details?term=GO:0009267
immune response-regulating signaling pathway	Gene Ontology	GO:0002764	9	213	0.00235596	0.0194358	ENSMUSG00000030144|ENSMUSG00000030142|ENSMUSG00000027843|ENSMUSG00000025473|ENSMUSG00000032496|ENSMUSG00000049130|ENSMUSG00000019768|ENSMUSG00000033777|ENSMUSG00000021025	http://amigo.geneontology.org/cgi-bin/amigo/term_details?term=GO:0002764
positive regulation of macroautophagy	Gene Ontology	GO:0016239	4	40	0.00239421	0.0196303	ENSMUSG00000078566|ENSMUSG00000000628|ENSMUSG00000028893|ENSMUSG00000045730	http://amigo.geneontology.org/cgi-bin/amigo/term_details?term=GO:0016239
genitalia development	Gene Ontology	GO:0048806	4	40	0.00239421	0.0196303	ENSMUSG00000060445|ENSMUSG00000019768|ENSMUSG00000009628|ENSMUSG00000038402	http://amigo.geneontology.org/cgi-bin/amigo/term_details?term=GO:0048806
regulation of triglyceride metabolic process	Gene Ontology	GO:0090207	4	40	0.00239421	0.0196303	ENSMUSG00000024042|ENSMUSG00000057074|ENSMUSG00000019768|ENSMUSG00000025509	http://amigo.geneontology.org/cgi-bin/amigo/term_details?term=GO:0090207
endothelial cell apoptotic process	Gene Ontology	GO:0072577	4	40	0.00239421	0.0196303	ENSMUSG00000048756|ENSMUSG00000049001|ENSMUSG00000022018|ENSMUSG00000002289	http://amigo.geneontology.org/cgi-bin/amigo/term_details?term=GO:0072577
carbohydrate transport	Gene Ontology	GO:0008643	7	135	0.00241255	0.0197203	ENSMUSG00000020053|ENSMUSG00000028893|ENSMUSG00000030087|ENSMUSG00000000628|ENSMUSG00000019768|ENSMUSG00000027398|ENSMUSG00000003153	http://amigo.geneontology.org/cgi-bin/amigo/term_details?term=GO:0008643
regulation of intrinsic apoptotic signaling pathway	Gene Ontology	GO:2001242	7	135	0.00241255	0.0197203	ENSMUSG00000056054|ENSMUSG00000046223|ENSMUSG00000056071|ENSMUSG00000017737|ENSMUSG00000017707|ENSMUSG00000031770|ENSMUSG00000007659	http://amigo.geneontology.org/cgi-bin/amigo/term_details?term=GO:2001242
wound healing	Gene Ontology	GO:0042060	11	301	0.00243359	0.019862	ENSMUSG00000020053|ENSMUSG00000030093|ENSMUSG00000024529|ENSMUSG00000024063|ENSMUSG00000048534|ENSMUSG00000056071|ENSMUSG00000039109|ENSMUSG00000028128|ENSMUSG00000045730|ENSMUSG00000027737|ENSMUSG00000049001	http://amigo.geneontology.org/cgi-bin/amigo/term_details?term=GO:0042060
system process	Gene Ontology	GO:0003008	31	1379	0.00245316	0.0199479	ENSMUSG00000057123|ENSMUSG00000030790|ENSMUSG00000028003|ENSMUSG00000053965|ENSMUSG00000003484|ENSMUSG00000026576|ENSMUSG00000026480|ENSMUSG00000040907|ENSMUSG00000045613|ENSMUSG00000047250|ENSMUSG00000045730|ENSMUSG00000029802|ENSMUSG00000066319|ENSMUSG00000005320|ENSMUSG00000014813|ENSMUSG00000020053|ENSMUSG00000030087|ENSMUSG00000028194|ENSMUSG00000020423|ENSMUSG00000057604|ENSMUSG00000045502|…	http://amigo.geneontology.org/cgi-bin/amigo/term_details?term=GO:0003008
macroautophagy	Gene Ontology	GO:0016236	10	257	0.00245514	0.0199479	ENSMUSG00000028211|ENSMUSG00000028893|ENSMUSG00000042265|ENSMUSG00000078566|ENSMUSG00000045730|ENSMUSG00000057604|ENSMUSG00000000628|ENSMUSG00000026576|ENSMUSG00000033684|ENSMUSG00000019577	http://amigo.geneontology.org/cgi-bin/amigo/term_details?term=GO:0016236
innate immune response-activating signal transduction	Gene Ontology	GO:0002758	6	100	0.00245889	0.0199479	ENSMUSG00000027843|ENSMUSG00000025473|ENSMUSG00000032496|ENSMUSG00000019768|ENSMUSG00000033777|ENSMUSG00000021025	http://amigo.geneontology.org/cgi-bin/amigo/term_details?term=GO:0002758
vesicle	Gene Ontology	GO:0031982	58	3080	0.00246251	0.0199479	ENSMUSG00000028211|ENSMUSG00000039167|ENSMUSG00000028128|ENSMUSG00000020432|ENSMUSG00000003153|ENSMUSG00000027952|ENSMUSG00000032484|ENSMUSG00000073758|ENSMUSG00000058624|ENSMUSG00000029304|ENSMUSG00000033684|ENSMUSG00000041794|ENSMUSG00000015568|ENSMUSG00000002910|ENSMUSG00000044456|ENSMUSG00000037016|ENSMUSG00000026576|ENSMUSG00000028194|ENSMUSG00000033998|ENSMUSG00000040907|ENSMUSG00000046223|…	http://amigo.geneontology.org/cgi-bin/amigo/term_details?term=GO:0031982
collagen metabolic process	Gene Ontology	GO:0032963	5	68	0.00246275	0.0199479	ENSMUSG00000028967|ENSMUSG00000000901|ENSMUSG00000017737|ENSMUSG00000022018|ENSMUSG00000005800	http://amigo.geneontology.org/cgi-bin/amigo/term_details?term=GO:0032963
signal transducer activity	Gene Ontology	GO:0004871	27	1149	0.00257708	0.0208039	ENSMUSG00000030093|ENSMUSG00000039167|ENSMUSG00000045613|ENSMUSG00000021886|ENSMUSG00000046223|ENSMUSG00000045730|ENSMUSG00000026068|ENSMUSG00000023034|ENSMUSG00000005320|ENSMUSG00000071713|ENSMUSG00000045092|ENSMUSG00000027947|ENSMUSG00000010797|ENSMUSG00000025804|ENSMUSG00000047875|ENSMUSG00000030474|ENSMUSG00000045502|ENSMUSG00000026180|ENSMUSG00000059013|ENSMUSG00000061878|ENSMUSG00000003882|…	http://amigo.geneontology.org/cgi-bin/amigo/term_details?term=GO:0004871
negative regulation of phosphorus metabolic process	Gene Ontology	GO:0010563	15	495	0.00258008	0.0208039	ENSMUSG00000020053|ENSMUSG00000024066|ENSMUSG00000027843|ENSMUSG00000027398|ENSMUSG00000078817|ENSMUSG00000023067|ENSMUSG00000020427|ENSMUSG00000024190|ENSMUSG00000028967|ENSMUSG00000026628|ENSMUSG00000053113|ENSMUSG00000061718|ENSMUSG00000057719|ENSMUSG00000020108|ENSMUSG00000020893	http://amigo.geneontology.org/cgi-bin/amigo/term_details?term=GO:0010563
negative regulation of phosphate metabolic process	Gene Ontology	GO:0045936	15	495	0.00258008	0.0208039	ENSMUSG00000020053|ENSMUSG00000024066|ENSMUSG00000027843|ENSMUSG00000027398|ENSMUSG00000078817|ENSMUSG00000023067|ENSMUSG00000020427|ENSMUSG00000024190|ENSMUSG00000028967|ENSMUSG00000026628|ENSMUSG00000053113|ENSMUSG00000061718|ENSMUSG00000057719|ENSMUSG00000020108|ENSMUSG00000020893	http://amigo.geneontology.org/cgi-bin/amigo/term_details?term=GO:0045936
T cell homeostasis	Gene Ontology	GO:0043029	4	41	0.00260165	0.0209462	ENSMUSG00000003882|ENSMUSG00000024521|ENSMUSG00000031431|ENSMUSG00000024778	http://amigo.geneontology.org/cgi-bin/amigo/term_details?term=GO:0043029
multicellular organismal macromolecule metabolic process	Gene Ontology	GO:0044259	5	69	0.00261401	0.0209827	ENSMUSG00000028967|ENSMUSG00000000901|ENSMUSG00000017737|ENSMUSG00000022018|ENSMUSG00000005800	http://amigo.geneontology.org/cgi-bin/amigo/term_details?term=GO:0044259
regulation of I-kappaB kinase/NF-kappaB signaling	Gene Ontology	GO:0043122	8	176	0.0026502	0.0212413	ENSMUSG00000032496|ENSMUSG00000019768|ENSMUSG00000078817|ENSMUSG00000021025|ENSMUSG00000027398|ENSMUSG00000005824|ENSMUSG00000020893|ENSMUSG00000061878	http://amigo.geneontology.org/cgi-bin/amigo/term_details?term=GO:0043122
regulation of cell growth	Gene Ontology	GO:0001558	12	351	0.00267295	0.0213155	ENSMUSG00000020053|ENSMUSG00000038332|ENSMUSG00000027656|ENSMUSG00000028893|ENSMUSG00000005124|ENSMUSG00000038264|ENSMUSG00000019970|ENSMUSG00000023067|ENSMUSG00000020427|ENSMUSG00000001227|ENSMUSG00000071713|ENSMUSG00000061878	http://amigo.geneontology.org/cgi-bin/amigo/term_details?term=GO:0001558
positive regulation of transcription from RNA polymerase II promoter in response to stress	Gene Ontology	GO:0036003	3	19	0.00267538	0.0213155	ENSMUSG00000026628|ENSMUSG00000028893|ENSMUSG00000056501	http://amigo.geneontology.org/cgi-bin/amigo/term_details?term=GO:0036003
interleukin-6 biosynthetic process	Gene Ontology	GO:0042226	3	19	0.00267538	0.0213155	ENSMUSG00000027398|ENSMUSG00000056501|ENSMUSG00000078817	http://amigo.geneontology.org/cgi-bin/amigo/term_details?term=GO:0042226
heat generation	Gene Ontology	GO:0031649	3	19	0.00267538	0.0213155	ENSMUSG00000027398|ENSMUSG00000026981|ENSMUSG00000045730	http://amigo.geneontology.org/cgi-bin/amigo/term_details?term=GO:0031649
regulation of translation	Gene Ontology	GO:0006417	10	261	0.00273206	0.0217233	ENSMUSG00000020053|ENSMUSG00000048756|ENSMUSG00000028893|ENSMUSG00000076431|ENSMUSG00000020423|ENSMUSG00000044786|ENSMUSG00000019768|ENSMUSG00000056071|ENSMUSG00000037922|ENSMUSG00000020893	http://amigo.geneontology.org/cgi-bin/amigo/term_details?term=GO:0006417
cellular carbohydrate metabolic process	Gene Ontology	GO:0044262	9	218	0.00273468	0.0217233	ENSMUSG00000020053|ENSMUSG00000027513|ENSMUSG00000028893|ENSMUSG00000024042|ENSMUSG00000020427|ENSMUSG00000000628|ENSMUSG00000029802|ENSMUSG00000020108|ENSMUSG00000019577	http://amigo.geneontology.org/cgi-bin/amigo/term_details?term=GO:0044262
kinase activator activity	Gene Ontology	GO:0019209	5	70	0.0027719	0.0219863	ENSMUSG00000020053|ENSMUSG00000000628|ENSMUSG00000023067|ENSMUSG00000022018|ENSMUSG00000032496	http://amigo.geneontology.org/cgi-bin/amigo/term_details?term=GO:0019209
regulation of mitochondrial membrane permeability	Gene Ontology	GO:0046902	4	42	0.00282108	0.0223288	ENSMUSG00000000628|ENSMUSG00000078566|ENSMUSG00000024521|ENSMUSG00000007659	http://amigo.geneontology.org/cgi-bin/amigo/term_details?term=GO:0046902
positive regulation of peptide secretion	Gene Ontology	GO:0002793	6	103	0.0028276	0.0223288	ENSMUSG00000056054|ENSMUSG00000076431|ENSMUSG00000026473|ENSMUSG00000056071|ENSMUSG00000041794|ENSMUSG00000020848	http://amigo.geneontology.org/cgi-bin/amigo/term_details?term=GO:0002793
positive regulation of nucleocytoplasmic transport	Gene Ontology	GO:0046824	6	103	0.0028276	0.0223288	ENSMUSG00000020053|ENSMUSG00000027843|ENSMUSG00000078817|ENSMUSG00000027398|ENSMUSG00000005824|ENSMUSG00000061878	http://amigo.geneontology.org/cgi-bin/amigo/term_details?term=GO:0046824
myeloid leukocyte differentiation	Gene Ontology	GO:0002573	8	178	0.00283206	0.0223312	ENSMUSG00000058818|ENSMUSG00000047798|ENSMUSG00000025804|ENSMUSG00000025473|ENSMUSG00000021250|ENSMUSG00000052837|ENSMUSG00000086564|ENSMUSG00000056501	http://amigo.geneontology.org/cgi-bin/amigo/term_details?term=GO:0002573
autophagy	Gene Ontology	GO:0006914	13	402	0.0028739	0.0226277	ENSMUSG00000028211|ENSMUSG00000056054|ENSMUSG00000026576|ENSMUSG00000042265|ENSMUSG00000027843|ENSMUSG00000056071|ENSMUSG00000078566|ENSMUSG00000045730|ENSMUSG00000057604|ENSMUSG00000000628|ENSMUSG00000028893|ENSMUSG00000033684|ENSMUSG00000019577	http://amigo.geneontology.org/cgi-bin/amigo/term_details?term=GO:0006914
cation transport	Gene Ontology	GO:0006812	20	765	0.00292527	0.0229984	ENSMUSG00000020053|ENSMUSG00000057123|ENSMUSG00000020432|ENSMUSG00000026576|ENSMUSG00000033998|ENSMUSG00000025804|ENSMUSG00000028255|ENSMUSG00000024042|ENSMUSG00000017737|ENSMUSG00000019970|ENSMUSG00000044026|ENSMUSG00000027483|ENSMUSG00000045730|ENSMUSG00000040907|ENSMUSG00000029321|ENSMUSG00000047330|ENSMUSG00000078532|ENSMUSG00000022464|ENSMUSG00000014813|ENSMUSG00000020893	http://amigo.geneontology.org/cgi-bin/amigo/term_details?term=GO:0006812
cellular glucose homeostasis	Gene Ontology	GO:0001678	6	104	0.00295924	0.0232313	ENSMUSG00000020053|ENSMUSG00000035828|ENSMUSG00000028893|ENSMUSG00000076431|ENSMUSG00000000628|ENSMUSG00000033685	http://amigo.geneontology.org/cgi-bin/amigo/term_details?term=GO:0001678
regulation of cell adhesion	Gene Ontology	GO:0030155	16	554	0.00298249	0.0233237	ENSMUSG00000020053|ENSMUSG00000045092|ENSMUSG00000026981|ENSMUSG00000027843|ENSMUSG00000020032|ENSMUSG00000003882|ENSMUSG00000053965|ENSMUSG00000045730|ENSMUSG00000031217|ENSMUSG00000056501|ENSMUSG00000025473|ENSMUSG00000027398|ENSMUSG00000029304|ENSMUSG00000005824|ENSMUSG00000049001|ENSMUSG00000022018	http://amigo.geneontology.org/cgi-bin/amigo/term_details?term=GO:0030155
carbohydrate binding	Gene Ontology	GO:0030246	9	221	0.00298407	0.0233237	ENSMUSG00000030144|ENSMUSG00000030142|ENSMUSG00000004609|ENSMUSG00000026581|ENSMUSG00000030474|ENSMUSG00000000628|ENSMUSG00000021903|ENSMUSG00000028776|ENSMUSG00000003153	http://amigo.geneontology.org/cgi-bin/amigo/term_details?term=GO:0030246
muscle contraction	Gene Ontology	GO:0006936	9	221	0.00298407	0.0233237	ENSMUSG00000057123|ENSMUSG00000026576|ENSMUSG00000040907|ENSMUSG00000045613|ENSMUSG00000047250|ENSMUSG00000045730|ENSMUSG00000014813|ENSMUSG00000053965|ENSMUSG00000061878	http://amigo.geneontology.org/cgi-bin/amigo/term_details?term=GO:0006936
negative regulation of cellular biosynthetic process	Gene Ontology	GO:0031327	27	1162	0.00299489	0.0233632	ENSMUSG00000049892|ENSMUSG00000056501|ENSMUSG00000038402|ENSMUSG00000055116|ENSMUSG00000052837|ENSMUSG00000043099|ENSMUSG00000031431|ENSMUSG00000047146|ENSMUSG00000044786|ENSMUSG00000020893|ENSMUSG00000020593|ENSMUSG00000048756|ENSMUSG00000027398|ENSMUSG00000020423|ENSMUSG00000024042|ENSMUSG00000057604|ENSMUSG00000056749|ENSMUSG00000078817|ENSMUSG00000028893|ENSMUSG00000063632|ENSMUSG00000024190|…	http://amigo.geneontology.org/cgi-bin/amigo/term_details?term=GO:0031327
organ morphogenesis	Gene Ontology	GO:0009887	22	877	0.00299786	0.0233632	ENSMUSG00000045092|ENSMUSG00000057123|ENSMUSG00000030093|ENSMUSG00000056501|ENSMUSG00000038402|ENSMUSG00000048756|ENSMUSG00000005320|ENSMUSG00000014813|ENSMUSG00000063632|ENSMUSG00000020053|ENSMUSG00000010797|ENSMUSG00000037962|ENSMUSG00000076431|ENSMUSG00000032496|ENSMUSG00000046743|ENSMUSG00000045672|ENSMUSG00000040055|ENSMUSG00000028967|ENSMUSG00000019768|ENSMUSG00000060445|ENSMUSG00000019851|…	http://amigo.geneontology.org/cgi-bin/amigo/term_details?term=GO:0009887
chemokine binding	Gene Ontology	GO:0019956	3	20	0.00304776	0.0237176	ENSMUSG00000026180|ENSMUSG00000044786|ENSMUSG00000025804	http://amigo.geneontology.org/cgi-bin/amigo/term_details?term=GO:0019956
response to nutrient levels	Gene Ontology	GO:0031667	9	222	0.00307107	0.0238643	ENSMUSG00000027513|ENSMUSG00000026473|ENSMUSG00000023067|ENSMUSG00000002289|ENSMUSG00000029304|ENSMUSG00000026628|ENSMUSG00000044786|ENSMUSG00000045730|ENSMUSG00000019577	http://amigo.geneontology.org/cgi-bin/amigo/term_details?term=GO:0031667
regulation of biomineral tissue development	Gene Ontology	GO:0070167	5	72	0.0031082	0.0239099	ENSMUSG00000045092|ENSMUSG00000054675|ENSMUSG00000045730|ENSMUSG00000037962|ENSMUSG00000025804	http://amigo.geneontology.org/cgi-bin/amigo/term_details?term=GO:0070167
positive regulation of autophagy	Gene Ontology	GO:0010508	5	72	0.0031082	0.0239099	ENSMUSG00000028211|ENSMUSG00000078566|ENSMUSG00000000628|ENSMUSG00000028893|ENSMUSG00000045730	http://amigo.geneontology.org/cgi-bin/amigo/term_details?term=GO:0010508
glial cell development	Gene Ontology	GO:0021782	5	72	0.0031082	0.0239099	ENSMUSG00000056071|ENSMUSG00000056054|ENSMUSG00000035456|ENSMUSG00000063632|ENSMUSG00000076431	http://amigo.geneontology.org/cgi-bin/amigo/term_details?term=GO:0021782
signal transduction in absence of ligand	Gene Ontology	GO:0038034	5	72	0.0031082	0.0239099	ENSMUSG00000020053|ENSMUSG00000048756|ENSMUSG00000027398|ENSMUSG00000024778|ENSMUSG00000007659	http://amigo.geneontology.org/cgi-bin/amigo/term_details?term=GO:0038034
lymphocyte homeostasis	Gene Ontology	GO:0002260	5	72	0.0031082	0.0239099	ENSMUSG00000058818|ENSMUSG00000003882|ENSMUSG00000024521|ENSMUSG00000031431|ENSMUSG00000024778	http://amigo.geneontology.org/cgi-bin/amigo/term_details?term=GO:0002260
negative regulation of cysteine-type endopeptidase activity involved in apoptotic process	Gene Ontology	GO:0043154	5	72	0.0031082	0.0239099	ENSMUSG00000020053|ENSMUSG00000023034|ENSMUSG00000046223|ENSMUSG00000031770|ENSMUSG00000017737	http://amigo.geneontology.org/cgi-bin/amigo/term_details?term=GO:0043154
extrinsic apoptotic signaling pathway in absence of ligand	Gene Ontology	GO:0097192	5	72	0.0031082	0.0239099	ENSMUSG00000020053|ENSMUSG00000048756|ENSMUSG00000027398|ENSMUSG00000024778|ENSMUSG00000007659	http://amigo.geneontology.org/cgi-bin/amigo/term_details?term=GO:0097192
second-messenger-mediated signaling	Gene Ontology	GO:0019932	8	181	0.00312294	0.0239889	ENSMUSG00000020053|ENSMUSG00000026576|ENSMUSG00000049892|ENSMUSG00000057604|ENSMUSG00000031765|ENSMUSG00000031762|ENSMUSG00000049001|ENSMUSG00000061878	http://amigo.geneontology.org/cgi-bin/amigo/term_details?term=GO:0019932
negative regulation of defense response	Gene Ontology	GO:0031348	7	142	0.00315608	0.0242087	ENSMUSG00000025804|ENSMUSG00000045730|ENSMUSG00000030474|ENSMUSG00000053113|ENSMUSG00000078817|ENSMUSG00000026073|ENSMUSG00000044786	http://amigo.geneontology.org/cgi-bin/amigo/term_details?term=GO:0031348
muscle cell proliferation	Gene Ontology	GO:0033002	8	182	0.0032249	0.0247012	ENSMUSG00000020053|ENSMUSG00000045092|ENSMUSG00000027947|ENSMUSG00000010797|ENSMUSG00000005124|ENSMUSG00000017737|ENSMUSG00000020427|ENSMUSG00000019768	http://amigo.geneontology.org/cgi-bin/amigo/term_details?term=GO:0033002
negative regulation of hydrolase activity	Gene Ontology	GO:0051346	11	313	0.00324549	0.0248234	ENSMUSG00000020053|ENSMUSG00000046223|ENSMUSG00000032484|ENSMUSG00000032496|ENSMUSG00000079012|ENSMUSG00000017737|ENSMUSG00000031770|ENSMUSG00000057719|ENSMUSG00000023034|ENSMUSG00000066361|ENSMUSG00000002289	http://amigo.geneontology.org/cgi-bin/amigo/term_details?term=GO:0051346
negative regulation of cysteine-type endopeptidase activity	Gene Ontology	GO:2000117	5	73	0.00328695	0.0249582	ENSMUSG00000020053|ENSMUSG00000023034|ENSMUSG00000046223|ENSMUSG00000031770|ENSMUSG00000017737	http://amigo.geneontology.org/cgi-bin/amigo/term_details?term=GO:2000117
negative regulation of cysteine-type endopeptidase activity involved in apoptotic signaling pathway	Gene Ontology	GO:2001268	2	5	0.00329109	0.0249582	ENSMUSG00000017737|ENSMUSG00000046223	http://amigo.geneontology.org/cgi-bin/amigo/term_details?term=GO:2001268
detoxification of inorganic compound	Gene Ontology	GO:0061687	2	5	0.00329109	0.0249582	ENSMUSG00000031762|ENSMUSG00000031765	http://amigo.geneontology.org/cgi-bin/amigo/term_details?term=GO:0061687
skeletal muscle satellite cell maintenance involved in skeletal muscle regeneration	Gene Ontology	GO:0014834	2	5	0.00329109	0.0249582	ENSMUSG00000020053|ENSMUSG00000030093	http://amigo.geneontology.org/cgi-bin/amigo/term_details?term=GO:0014834
leucine binding	Gene Ontology	GO:0070728	2	5	0.00329109	0.0249582	ENSMUSG00000038332|ENSMUSG00000028893	http://amigo.geneontology.org/cgi-bin/amigo/term_details?term=GO:0070728
negative regulation of fibroblast growth factor production	Gene Ontology	GO:0090272	2	5	0.00329109	0.0249582	ENSMUSG00000005320|ENSMUSG00000022018	http://amigo.geneontology.org/cgi-bin/amigo/term_details?term=GO:0090272
carbon-carbon lyase activity	Gene Ontology	GO:0016830	4	44	0.00329729	0.0249699	ENSMUSG00000027360|ENSMUSG00000027513|ENSMUSG00000064120|ENSMUSG00000026473	http://amigo.geneontology.org/cgi-bin/amigo/term_details?term=GO:0016830
regulation of lymphocyte proliferation	Gene Ontology	GO:0050670	8	183	0.00332942	0.0251421	ENSMUSG00000020053|ENSMUSG00000027843|ENSMUSG00000053965|ENSMUSG00000023067|ENSMUSG00000031217|ENSMUSG00000056501|ENSMUSG00000027398|ENSMUSG00000063632	http://amigo.geneontology.org/cgi-bin/amigo/term_details?term=GO:0050670
glial cell differentiation	Gene Ontology	GO:0010001	8	183	0.00332942	0.0251421	ENSMUSG00000020053|ENSMUSG00000056054|ENSMUSG00000030087|ENSMUSG00000076431|ENSMUSG00000056071|ENSMUSG00000035456|ENSMUSG00000027398|ENSMUSG00000063632	http://amigo.geneontology.org/cgi-bin/amigo/term_details?term=GO:0010001
ion binding	Gene Ontology	GO:0043167	61	3323	0.00334514	0.0252251	ENSMUSG00000038332|ENSMUSG00000032661|ENSMUSG00000053965|ENSMUSG00000039109|ENSMUSG00000064120|ENSMUSG00000039167|ENSMUSG00000058624|ENSMUSG00000028003|ENSMUSG00000060063|ENSMUSG00000057719|ENSMUSG00000027513|ENSMUSG00000020848|ENSMUSG00000025330|ENSMUSG00000037016|ENSMUSG00000003484|ENSMUSG00000026576|ENSMUSG00000030087|ENSMUSG00000040907|ENSMUSG00000043099|ENSMUSG00000020387|ENSMUSG00000047250|…	http://amigo.geneontology.org/cgi-bin/amigo/term_details?term=GO:0043167
activation of innate immune response	Gene Ontology	GO:0002218	6	107	0.00338172	0.0254652	ENSMUSG00000027843|ENSMUSG00000025473|ENSMUSG00000032496|ENSMUSG00000019768|ENSMUSG00000033777|ENSMUSG00000021025	http://amigo.geneontology.org/cgi-bin/amigo/term_details?term=GO:0002218
regulation of membrane potential	Gene Ontology	GO:0042391	11	315	0.00339981	0.0255654	ENSMUSG00000030093|ENSMUSG00000057123|ENSMUSG00000026576|ENSMUSG00000033998|ENSMUSG00000040907|ENSMUSG00000024521|ENSMUSG00000078566|ENSMUSG00000026981|ENSMUSG00000045730|ENSMUSG00000007659|ENSMUSG00000033685	http://amigo.geneontology.org/cgi-bin/amigo/term_details?term=GO:0042391
transcriptional activator activity, RNA polymerase II core promoter proximal region sequence-specific binding	Gene Ontology	GO:0001077	9	226	0.0034393	0.0256934	ENSMUSG00000076431|ENSMUSG00000021250|ENSMUSG00000052837|ENSMUSG00000036144|ENSMUSG00000023034|ENSMUSG00000019768|ENSMUSG00000055116|ENSMUSG00000063632|ENSMUSG00000056501	http://amigo.geneontology.org/cgi-bin/amigo/term_details?term=GO:0001077
positive regulation of epidermal growth factor receptor signaling pathway	Gene Ontology	GO:0045742	3	21	0.00345042	0.0256934	ENSMUSG00000017737|ENSMUSG00000046223|ENSMUSG00000019768	http://amigo.geneontology.org/cgi-bin/amigo/term_details?term=GO:0045742
negative regulation of interleukin-1 production	Gene Ontology	GO:0032692	3	21	0.00345042	0.0256934	ENSMUSG00000028967|ENSMUSG00000078817|ENSMUSG00000026073	http://amigo.geneontology.org/cgi-bin/amigo/term_details?term=GO:0032692
positive regulation of muscle cell apoptotic process	Gene Ontology	GO:0010661	3	21	0.00345042	0.0256934	ENSMUSG00000026180|ENSMUSG00000078566|ENSMUSG00000020427	http://amigo.geneontology.org/cgi-bin/amigo/term_details?term=GO:0010661
organ maturation	Gene Ontology	GO:0048799	3	21	0.00345042	0.0256934	ENSMUSG00000020053|ENSMUSG00000046743|ENSMUSG00000037962	http://amigo.geneontology.org/cgi-bin/amigo/term_details?term=GO:0048799
antibacterial humoral response	Gene Ontology	GO:0019731	3	21	0.00345042	0.0256934	ENSMUSG00000032496|ENSMUSG00000030790|ENSMUSG00000027483	http://amigo.geneontology.org/cgi-bin/amigo/term_details?term=GO:0019731
response to ischemia	Gene Ontology	GO:0002931	3	21	0.00345042	0.0256934	ENSMUSG00000000628|ENSMUSG00000049001|ENSMUSG00000007659	http://amigo.geneontology.org/cgi-bin/amigo/term_details?term=GO:0002931
organic acid transport	Gene Ontology	GO:0015849	5	74	0.00347297	0.0258248	ENSMUSG00000027737|ENSMUSG00000030495|ENSMUSG00000022464|ENSMUSG00000032204|ENSMUSG00000022180	http://amigo.geneontology.org/cgi-bin/amigo/term_details?term=GO:0015849
monocarboxylic acid metabolic process	Gene Ontology	GO:0032787	14	461	0.00347771	0.0258248	ENSMUSG00000020053|ENSMUSG00000027513|ENSMUSG00000003484|ENSMUSG00000028893|ENSMUSG00000047250|ENSMUSG00000000628|ENSMUSG00000072949|ENSMUSG00000060063|ENSMUSG00000005320|ENSMUSG00000020108|ENSMUSG00000015568|ENSMUSG00000020593|ENSMUSG00000061878|ENSMUSG00000019577	http://amigo.geneontology.org/cgi-bin/amigo/term_details?term=GO:0032787
defense response to virus	Gene Ontology	GO:0051607	9	227	0.00353657	0.0261892	ENSMUSG00000032661|ENSMUSG00000026576|ENSMUSG00000042265|ENSMUSG00000027843|ENSMUSG00000078566|ENSMUSG00000017707|ENSMUSG00000057604|ENSMUSG00000020108|ENSMUSG00000019577	http://amigo.geneontology.org/cgi-bin/amigo/term_details?term=GO:0051607
positive regulation of catabolic process	Gene Ontology	GO:0009896	9	227	0.00353657	0.0261892	ENSMUSG00000020053|ENSMUSG00000020423|ENSMUSG00000020427|ENSMUSG00000045730|ENSMUSG00000044786|ENSMUSG00000031770|ENSMUSG00000025473|ENSMUSG00000027398|ENSMUSG00000025509	http://amigo.geneontology.org/cgi-bin/amigo/term_details?term=GO:0009896
regulation of mononuclear cell proliferation	Gene Ontology	GO:0032944	8	185	0.00354635	0.0262253	ENSMUSG00000020053|ENSMUSG00000027843|ENSMUSG00000053965|ENSMUSG00000023067|ENSMUSG00000031217|ENSMUSG00000056501|ENSMUSG00000027398|ENSMUSG00000063632	http://amigo.geneontology.org/cgi-bin/amigo/term_details?term=GO:0032944
lipopolysaccharide-mediated signaling pathway	Gene Ontology	GO:0031663	4	45	0.00355472	0.026251	ENSMUSG00000021025|ENSMUSG00000027398|ENSMUSG00000032496|ENSMUSG00000027843	http://amigo.geneontology.org/cgi-bin/amigo/term_details?term=GO:0031663
immune system development	Gene Ontology	GO:0002520	20	779	0.00356395	0.0262829	ENSMUSG00000058818|ENSMUSG00000030144|ENSMUSG00000047798|ENSMUSG00000048756|ENSMUSG00000027843|ENSMUSG00000030142|ENSMUSG00000025804|ENSMUSG00000003882|ENSMUSG00000021250|ENSMUSG00000076431|ENSMUSG00000052837|ENSMUSG00000086564|ENSMUSG00000044786|ENSMUSG00000056501|ENSMUSG00000025473|ENSMUSG00000021025|ENSMUSG00000027398|ENSMUSG00000028859|ENSMUSG00000024778|ENSMUSG00000021765	http://amigo.geneontology.org/cgi-bin/amigo/term_details?term=GO:0002520
peptide hormone secretion	Gene Ontology	GO:0030072	9	228	0.00363598	0.0267404	ENSMUSG00000035828|ENSMUSG00000026981|ENSMUSG00000076431|ENSMUSG00000026473|ENSMUSG00000041794|ENSMUSG00000055116|ENSMUSG00000027398|ENSMUSG00000020848|ENSMUSG00000033685	http://amigo.geneontology.org/cgi-bin/amigo/term_details?term=GO:0030072
organic acid biosynthetic process	Gene Ontology	GO:0016053	9	228	0.00363598	0.0267404	ENSMUSG00000015568|ENSMUSG00000026473|ENSMUSG00000047250|ENSMUSG00000060063|ENSMUSG00000005320|ENSMUSG00000027068|ENSMUSG00000025330|ENSMUSG00000061878|ENSMUSG00000019577	http://amigo.geneontology.org/cgi-bin/amigo/term_details?term=GO:0016053
negative regulation of peptidase activity	Gene Ontology	GO:0010466	8	186	0.00365884	0.0268348	ENSMUSG00000020053|ENSMUSG00000046223|ENSMUSG00000032484|ENSMUSG00000079012|ENSMUSG00000017737|ENSMUSG00000031770|ENSMUSG00000023034|ENSMUSG00000066361	http://amigo.geneontology.org/cgi-bin/amigo/term_details?term=GO:0010466
regulation of peptide hormone secretion	Gene Ontology	GO:0090276	8	186	0.00365884	0.0268348	ENSMUSG00000035828|ENSMUSG00000076431|ENSMUSG00000026473|ENSMUSG00000041794|ENSMUSG00000055116|ENSMUSG00000027398|ENSMUSG00000020848|ENSMUSG00000033685	http://amigo.geneontology.org/cgi-bin/amigo/term_details?term=GO:0090276
negative regulation of blood vessel morphogenesis	Gene Ontology	GO:2000181	5	75	0.00366643	0.0268537	ENSMUSG00000024066|ENSMUSG00000032484|ENSMUSG00000022018|ENSMUSG00000036144|ENSMUSG00000045730	http://amigo.geneontology.org/cgi-bin/amigo/term_details?term=GO:2000181
negative regulation of inflammatory response	Gene Ontology	GO:0050728	6	109	0.00368729	0.0269696	ENSMUSG00000045730|ENSMUSG00000030474|ENSMUSG00000053113|ENSMUSG00000078817|ENSMUSG00000026073|ENSMUSG00000044786	http://amigo.geneontology.org/cgi-bin/amigo/term_details?term=GO:0050728
protein dimerization activity	Gene Ontology	GO:0046983	25	1066	0.00377411	0.027567	ENSMUSG00000039167|ENSMUSG00000067235|ENSMUSG00000030350|ENSMUSG00000056501|ENSMUSG00000055116|ENSMUSG00000045730|ENSMUSG00000023034|ENSMUSG00000029802|ENSMUSG00000004328|ENSMUSG00000024066|ENSMUSG00000027947|ENSMUSG00000038342|ENSMUSG00000076431|ENSMUSG00000033777|ENSMUSG00000021250|ENSMUSG00000031605|ENSMUSG00000030545|ENSMUSG00000048534|ENSMUSG00000078566|ENSMUSG00000006642|ENSMUSG00000026628|…	http://amigo.geneontology.org/cgi-bin/amigo/term_details?term=GO:0046983
negative regulation of neuron apoptotic process	Gene Ontology	GO:0043524	7	147	0.00378608	0.0276167	ENSMUSG00000020423|ENSMUSG00000007659|ENSMUSG00000049130|ENSMUSG00000056501|ENSMUSG00000025473|ENSMUSG00000049001|ENSMUSG00000031765	http://amigo.geneontology.org/cgi-bin/amigo/term_details?term=GO:0043524
tissue morphogenesis	Gene Ontology	GO:0048729	16	569	0.00383189	0.0279129	ENSMUSG00000020053|ENSMUSG00000045092|ENSMUSG00000014813|ENSMUSG00000010797|ENSMUSG00000076431|ENSMUSG00000025473|ENSMUSG00000030093|ENSMUSG00000021765|ENSMUSG00000030790|ENSMUSG00000053113|ENSMUSG00000046743|ENSMUSG00000019768|ENSMUSG00000038402|ENSMUSG00000026180|ENSMUSG00000063632|ENSMUSG00000037016	http://amigo.geneontology.org/cgi-bin/amigo/term_details?term=GO:0048729
central nervous system development	Gene Ontology	GO:0007417	18	676	0.00387943	0.0281401	ENSMUSG00000020053|ENSMUSG00000045092|ENSMUSG00000056054|ENSMUSG00000010797|ENSMUSG00000027398|ENSMUSG00000076431|ENSMUSG00000020423|ENSMUSG00000030093|ENSMUSG00000049130|ENSMUSG00000038264|ENSMUSG00000035456|ENSMUSG00000046743|ENSMUSG00000048756|ENSMUSG00000056071|ENSMUSG00000020108|ENSMUSG00000063632|ENSMUSG00000024778|ENSMUSG00000061878	http://amigo.geneontology.org/cgi-bin/amigo/term_details?term=GO:0007417
collagen catabolic process	Gene Ontology	GO:0030574	3	22	0.00388412	0.0281401	ENSMUSG00000000901|ENSMUSG00000017737|ENSMUSG00000005800	http://amigo.geneontology.org/cgi-bin/amigo/term_details?term=GO:0030574
positive regulation of ERBB signaling pathway	Gene Ontology	GO:1901186	3	22	0.00388412	0.0281401	ENSMUSG00000017737|ENSMUSG00000046223|ENSMUSG00000019768	http://amigo.geneontology.org/cgi-bin/amigo/term_details?term=GO:1901186
hexose metabolic process	Gene Ontology	GO:0019318	8	188	0.00389209	0.0281598	ENSMUSG00000020053|ENSMUSG00000027513|ENSMUSG00000028893|ENSMUSG00000024042|ENSMUSG00000026628|ENSMUSG00000020427|ENSMUSG00000000628|ENSMUSG00000019577	http://amigo.geneontology.org/cgi-bin/amigo/term_details?term=GO:0019318
neural precursor cell proliferation	Gene Ontology	GO:0061351	7	148	0.00392278	0.0283435	ENSMUSG00000020053|ENSMUSG00000048756|ENSMUSG00000010797|ENSMUSG00000030093|ENSMUSG00000020423|ENSMUSG00000049130|ENSMUSG00000027398	http://amigo.geneontology.org/cgi-bin/amigo/term_details?term=GO:0061351
glycerolipid metabolic process	Gene Ontology	GO:0046486	9	231	0.00394744	0.0284833	ENSMUSG00000027513|ENSMUSG00000024042|ENSMUSG00000024210|ENSMUSG00000017707|ENSMUSG00000057074|ENSMUSG00000019768|ENSMUSG00000015568|ENSMUSG00000020593|ENSMUSG00000025509	http://amigo.geneontology.org/cgi-bin/amigo/term_details?term=GO:0046486
negative regulation of cellular macromolecule biosynthetic process	Gene Ontology	GO:2000113	25	1071	0.00399959	0.0288207	ENSMUSG00000049892|ENSMUSG00000056501|ENSMUSG00000038402|ENSMUSG00000055116|ENSMUSG00000052837|ENSMUSG00000043099|ENSMUSG00000031431|ENSMUSG00000047146|ENSMUSG00000044786|ENSMUSG00000020893|ENSMUSG00000020593|ENSMUSG00000048756|ENSMUSG00000020423|ENSMUSG00000024042|ENSMUSG00000057604|ENSMUSG00000056749|ENSMUSG00000027398|ENSMUSG00000028893|ENSMUSG00000063632|ENSMUSG00000024190|ENSMUSG00000026628|…	http://amigo.geneontology.org/cgi-bin/amigo/term_details?term=GO:2000113
cellular response to peptide	Gene Ontology	GO:1901653	8	189	0.00401293	0.028878	ENSMUSG00000020053|ENSMUSG00000027843|ENSMUSG00000019970|ENSMUSG00000053113|ENSMUSG00000023034|ENSMUSG00000027398|ENSMUSG00000020593|ENSMUSG00000019577	http://amigo.geneontology.org/cgi-bin/amigo/term_details?term=GO:1901653
myoblast differentiation	Gene Ontology	GO:0045445	5	77	0.00407635	0.0292165	ENSMUSG00000020053|ENSMUSG00000021508|ENSMUSG00000005824|ENSMUSG00000019122|ENSMUSG00000020427	http://amigo.geneontology.org/cgi-bin/amigo/term_details?term=GO:0045445
cellular response to fibroblast growth factor stimulus	Gene Ontology	GO:0044344	5	77	0.00407635	0.0292165	ENSMUSG00000005320|ENSMUSG00000023034|ENSMUSG00000044786|ENSMUSG00000046743|ENSMUSG00000044461	http://amigo.geneontology.org/cgi-bin/amigo/term_details?term=GO:0044344
cellular response to hypoxia	Gene Ontology	GO:0071456	5	77	0.00407635	0.0292165	ENSMUSG00000025473|ENSMUSG00000078566|ENSMUSG00000049001|ENSMUSG00000022018|ENSMUSG00000045730	http://amigo.geneontology.org/cgi-bin/amigo/term_details?term=GO:0071456
symbiosis, encompassing mutualism through parasitism	Gene Ontology	GO:0044403	14	470	0.00410055	0.0292219	ENSMUSG00000032661|ENSMUSG00000026576|ENSMUSG00000042265|ENSMUSG00000027843|ENSMUSG00000033777|ENSMUSG00000017737|ENSMUSG00000078566|ENSMUSG00000027483|ENSMUSG00000057604|ENSMUSG00000017707|ENSMUSG00000007659|ENSMUSG00000020108|ENSMUSG00000032496|ENSMUSG00000019577	http://amigo.geneontology.org/cgi-bin/amigo/term_details?term=GO:0044403
interspecies interaction between organisms	Gene Ontology	GO:0044419	14	470	0.00410055	0.0292219	ENSMUSG00000032661|ENSMUSG00000026576|ENSMUSG00000042265|ENSMUSG00000027843|ENSMUSG00000033777|ENSMUSG00000017737|ENSMUSG00000078566|ENSMUSG00000027483|ENSMUSG00000057604|ENSMUSG00000017707|ENSMUSG00000007659|ENSMUSG00000020108|ENSMUSG00000032496|ENSMUSG00000019577	http://amigo.geneontology.org/cgi-bin/amigo/term_details?term=GO:0044419
lung epithelium development	Gene Ontology	GO:0060428	4	47	0.00410984	0.0292219	ENSMUSG00000020053|ENSMUSG00000028967|ENSMUSG00000005320|ENSMUSG00000010797	http://amigo.geneontology.org/cgi-bin/amigo/term_details?term=GO:0060428
regulation of endocrine process	Gene Ontology	GO:0044060	4	47	0.00410984	0.0292219	ENSMUSG00000005320|ENSMUSG00000027398|ENSMUSG00000057123|ENSMUSG00000045502	http://amigo.geneontology.org/cgi-bin/amigo/term_details?term=GO:0044060
protein import into nucleus, translocation	Gene Ontology	GO:0000060	4	47	0.00410984	0.0292219	ENSMUSG00000020053|ENSMUSG00000021025|ENSMUSG00000055116|ENSMUSG00000023067	http://amigo.geneontology.org/cgi-bin/amigo/term_details?term=GO:0000060
regulation of bone remodeling	Gene Ontology	GO:0046850	4	47	0.00410984	0.0292219	ENSMUSG00000045092|ENSMUSG00000029304|ENSMUSG00000025473|ENSMUSG00000019577	http://amigo.geneontology.org/cgi-bin/amigo/term_details?term=GO:0046850
single-organism nuclear import	Gene Ontology	GO:1902593	9	233	0.00416642	0.0295066	ENSMUSG00000020053|ENSMUSG00000027843|ENSMUSG00000023067|ENSMUSG00000055116|ENSMUSG00000078817|ENSMUSG00000021025|ENSMUSG00000027398|ENSMUSG00000005824|ENSMUSG00000061878	http://amigo.geneontology.org/cgi-bin/amigo/term_details?term=GO:1902593
protein import into nucleus	Gene Ontology	GO:0006606	9	233	0.00416642	0.0295066	ENSMUSG00000020053|ENSMUSG00000027843|ENSMUSG00000023067|ENSMUSG00000055116|ENSMUSG00000078817|ENSMUSG00000021025|ENSMUSG00000027398|ENSMUSG00000005824|ENSMUSG00000061878	http://amigo.geneontology.org/cgi-bin/amigo/term_details?term=GO:0006606
protein targeting to nucleus	Gene Ontology	GO:0044744	9	233	0.00416642	0.0295066	ENSMUSG00000020053|ENSMUSG00000027843|ENSMUSG00000023067|ENSMUSG00000055116|ENSMUSG00000078817|ENSMUSG00000021025|ENSMUSG00000027398|ENSMUSG00000005824|ENSMUSG00000061878	http://amigo.geneontology.org/cgi-bin/amigo/term_details?term=GO:0044744
negative regulation of biosynthetic process	Gene Ontology	GO:0009890	27	1192	0.0041839	0.0295815	ENSMUSG00000049892|ENSMUSG00000056501|ENSMUSG00000038402|ENSMUSG00000055116|ENSMUSG00000052837|ENSMUSG00000043099|ENSMUSG00000031431|ENSMUSG00000047146|ENSMUSG00000044786|ENSMUSG00000020893|ENSMUSG00000020593|ENSMUSG00000048756|ENSMUSG00000027398|ENSMUSG00000020423|ENSMUSG00000024042|ENSMUSG00000057604|ENSMUSG00000056749|ENSMUSG00000078817|ENSMUSG00000028893|ENSMUSG00000063632|ENSMUSG00000024190|…	http://amigo.geneontology.org/cgi-bin/amigo/term_details?term=GO:0009890
positive regulation of cellular component organization	Gene Ontology	GO:0051130	25	1075	0.00418804	0.0295815	ENSMUSG00000030093|ENSMUSG00000036295|ENSMUSG00000078566|ENSMUSG00000058624|ENSMUSG00000005824|ENSMUSG00000020848|ENSMUSG00000021886|ENSMUSG00000046223|ENSMUSG00000045730|ENSMUSG00000047146|ENSMUSG00000037447|ENSMUSG00000049001|ENSMUSG00000020593|ENSMUSG00000020053|ENSMUSG00000038264|ENSMUSG00000020427|ENSMUSG00000027398|ENSMUSG00000061878|ENSMUSG00000024521|ENSMUSG00000017737|ENSMUSG00000019970|…	http://amigo.geneontology.org/cgi-bin/amigo/term_details?term=GO:0051130
defense response to bacterium	Gene Ontology	GO:0042742	8	191	0.00426331	0.0299997	ENSMUSG00000030144|ENSMUSG00000042265|ENSMUSG00000030142|ENSMUSG00000030790|ENSMUSG00000027483|ENSMUSG00000049130|ENSMUSG00000056501|ENSMUSG00000032496	http://amigo.geneontology.org/cgi-bin/amigo/term_details?term=GO:0042742
nuclear import	Gene Ontology	GO:0051170	9	234	0.00427941	0.0299997	ENSMUSG00000020053|ENSMUSG00000027843|ENSMUSG00000023067|ENSMUSG00000055116|ENSMUSG00000078817|ENSMUSG00000021025|ENSMUSG00000027398|ENSMUSG00000005824|ENSMUSG00000061878	http://amigo.geneontology.org/cgi-bin/amigo/term_details?term=GO:0051170
regulation of macroautophagy	Gene Ontology	GO:0016241	5	78	0.00429312	0.0299997	ENSMUSG00000078566|ENSMUSG00000000628|ENSMUSG00000028893|ENSMUSG00000033684|ENSMUSG00000045730	http://amigo.geneontology.org/cgi-bin/amigo/term_details?term=GO:0016241
actin cytoskeleton reorganization	Gene Ontology	GO:0031532	5	78	0.00429312	0.0299997	ENSMUSG00000045092|ENSMUSG00000056071|ENSMUSG00000021886|ENSMUSG00000020593|ENSMUSG00000056602	http://amigo.geneontology.org/cgi-bin/amigo/term_details?term=GO:0031532
positive regulation of cardiac muscle hypertrophy	Gene Ontology	GO:0010613	3	23	0.00434953	0.0299997	ENSMUSG00000020053|ENSMUSG00000053965|ENSMUSG00000005124	http://amigo.geneontology.org/cgi-bin/amigo/term_details?term=GO:0010613
positive regulation of muscle hypertrophy	Gene Ontology	GO:0014742	3	23	0.00434953	0.0299997	ENSMUSG00000020053|ENSMUSG00000053965|ENSMUSG00000005124	http://amigo.geneontology.org/cgi-bin/amigo/term_details?term=GO:0014742
type B pancreatic cell proliferation	Gene Ontology	GO:0044342	3	23	0.00434953	0.0299997	ENSMUSG00000028967|ENSMUSG00000023034|ENSMUSG00000020427	http://amigo.geneontology.org/cgi-bin/amigo/term_details?term=GO:0044342
vitamin transport	Gene Ontology	GO:0051180	3	23	0.00434953	0.0299997	ENSMUSG00000038496|ENSMUSG00000020432|ENSMUSG00000003153	http://amigo.geneontology.org/cgi-bin/amigo/term_details?term=GO:0051180
L-serine transport	Gene Ontology	GO:0015825	2	6	0.00435109	0.0299997	ENSMUSG00000030495|ENSMUSG00000017707	http://amigo.geneontology.org/cgi-bin/amigo/term_details?term=GO:0015825
adiponectin secretion	Gene Ontology	GO:0070162	2	6	0.00435109	0.0299997	ENSMUSG00000027398|ENSMUSG00000045502	http://amigo.geneontology.org/cgi-bin/amigo/term_details?term=GO:0070162
positive regulation of mitophagy	Gene Ontology	GO:1903599	2	6	0.00435109	0.0299997	ENSMUSG00000000628|ENSMUSG00000045730	http://amigo.geneontology.org/cgi-bin/amigo/term_details?term=GO:1903599
negative regulation of glucocorticoid receptor signaling pathway	Gene Ontology	GO:2000323	2	6	0.00435109	0.0299997	ENSMUSG00000055116|ENSMUSG00000020893	http://amigo.geneontology.org/cgi-bin/amigo/term_details?term=GO:2000323
regulation of neutrophil apoptotic process	Gene Ontology	GO:0033029	2	6	0.00435109	0.0299997	ENSMUSG00000026180|ENSMUSG00000045502	http://amigo.geneontology.org/cgi-bin/amigo/term_details?term=GO:0033029
regulation of adiponectin secretion	Gene Ontology	GO:0070163	2	6	0.00435109	0.0299997	ENSMUSG00000027398|ENSMUSG00000045502	http://amigo.geneontology.org/cgi-bin/amigo/term_details?term=GO:0070163
stress response to metal ion	Gene Ontology	GO:0097501	2	6	0.00435109	0.0299997	ENSMUSG00000031762|ENSMUSG00000031765	http://amigo.geneontology.org/cgi-bin/amigo/term_details?term=GO:0097501
positive regulation of epithelial cell proliferation involved in wound healing	Gene Ontology	GO:0060054	2	6	0.00435109	0.0299997	ENSMUSG00000030093|ENSMUSG00000048534	http://amigo.geneontology.org/cgi-bin/amigo/term_details?term=GO:0060054
noradrenergic neuron differentiation	Gene Ontology	GO:0003357	2	6	0.00435109	0.0299997	ENSMUSG00000063632|ENSMUSG00000076431	http://amigo.geneontology.org/cgi-bin/amigo/term_details?term=GO:0003357
septum primum development	Gene Ontology	GO:0003284	2	6	0.00435109	0.0299997	ENSMUSG00000057123|ENSMUSG00000076431	http://amigo.geneontology.org/cgi-bin/amigo/term_details?term=GO:0003284
organic hydroxy compound biosynthetic process	Gene Ontology	GO:1901617	7	151	0.0043554	0.0299997	ENSMUSG00000027513|ENSMUSG00000027952|ENSMUSG00000024210|ENSMUSG00000027875|ENSMUSG00000027360|ENSMUSG00000027398|ENSMUSG00000061878	http://amigo.geneontology.org/cgi-bin/amigo/term_details?term=GO:1901617
negative regulation of lymphocyte activation	Gene Ontology	GO:0051250	6	113	0.00435931	0.0299997	ENSMUSG00000027843|ENSMUSG00000063632|ENSMUSG00000056501|ENSMUSG00000037922|ENSMUSG00000053965|ENSMUSG00000024778	http://amigo.geneontology.org/cgi-bin/amigo/term_details?term=GO:0051250
regulation of leukocyte proliferation	Gene Ontology	GO:0070663	8	192	0.00439292	0.0301921	ENSMUSG00000020053|ENSMUSG00000027843|ENSMUSG00000053965|ENSMUSG00000023067|ENSMUSG00000031217|ENSMUSG00000056501|ENSMUSG00000027398|ENSMUSG00000063632	http://amigo.geneontology.org/cgi-bin/amigo/term_details?term=GO:0070663
regulation of membrane permeability	Gene Ontology	GO:0090559	4	48	0.00440816	0.0302373	ENSMUSG00000000628|ENSMUSG00000078566|ENSMUSG00000024521|ENSMUSG00000007659	http://amigo.geneontology.org/cgi-bin/amigo/term_details?term=GO:0090559
negative regulation of transcription, DNA-templated	Gene Ontology	GO:0045892	22	907	0.00441079	0.0302373	ENSMUSG00000049892|ENSMUSG00000056501|ENSMUSG00000038402|ENSMUSG00000055116|ENSMUSG00000052837|ENSMUSG00000043099|ENSMUSG00000031431|ENSMUSG00000047146|ENSMUSG00000044786|ENSMUSG00000020893|ENSMUSG00000020593|ENSMUSG00000048756|ENSMUSG00000020423|ENSMUSG00000024042|ENSMUSG00000057604|ENSMUSG00000056749|ENSMUSG00000027398|ENSMUSG00000063632|ENSMUSG00000026628|ENSMUSG00000035456|ENSMUSG00000019768|…	http://amigo.geneontology.org/cgi-bin/amigo/term_details?term=GO:0045892
immune effector process	Gene Ontology	GO:0002252	16	578	0.00443073	0.0303352	ENSMUSG00000058818|ENSMUSG00000030144|ENSMUSG00000032661|ENSMUSG00000026576|ENSMUSG00000030142|ENSMUSG00000027843|ENSMUSG00000038264|ENSMUSG00000003882|ENSMUSG00000078566|ENSMUSG00000017707|ENSMUSG00000057604|ENSMUSG00000042265|ENSMUSG00000020108|ENSMUSG00000022018|ENSMUSG00000024778|ENSMUSG00000019577	http://amigo.geneontology.org/cgi-bin/amigo/term_details?term=GO:0002252
organonitrogen compound biosynthetic process	Gene Ontology	GO:1901566	24	1023	0.00448701	0.0306466	ENSMUSG00000048756|ENSMUSG00000064120|ENSMUSG00000030790|ENSMUSG00000025330|ENSMUSG00000033685|ENSMUSG00000021886|ENSMUSG00000026473|ENSMUSG00000040740|ENSMUSG00000045730|ENSMUSG00000040451|ENSMUSG00000005686|ENSMUSG00000020893|ENSMUSG00000019768|ENSMUSG00000020053|ENSMUSG00000076431|ENSMUSG00000020423|ENSMUSG00000027398|ENSMUSG00000061878|ENSMUSG00000028893|ENSMUSG00000056071|ENSMUSG00000044786|…	http://amigo.geneontology.org/cgi-bin/amigo/term_details?term=GO:1901566
regulation of muscle cell differentiation	Gene Ontology	GO:0051147	7	152	0.00450732	0.0306466	ENSMUSG00000020053|ENSMUSG00000005124|ENSMUSG00000024042|ENSMUSG00000020427|ENSMUSG00000021508|ENSMUSG00000019122|ENSMUSG00000005824	http://amigo.geneontology.org/cgi-bin/amigo/term_details?term=GO:0051147
cytokine receptor binding	Gene Ontology	GO:0005126	9	236	0.00451256	0.0306466	ENSMUSG00000026981|ENSMUSG00000027947|ENSMUSG00000021508|ENSMUSG00000029335|ENSMUSG00000019122|ENSMUSG00000058755|ENSMUSG00000027398|ENSMUSG00000005824|ENSMUSG00000039304	http://amigo.geneontology.org/cgi-bin/amigo/term_details?term=GO:0005126
cellular response to decreased oxygen levels	Gene Ontology	GO:0036294	5	79	0.004518	0.0306466	ENSMUSG00000025473|ENSMUSG00000078566|ENSMUSG00000049001|ENSMUSG00000022018|ENSMUSG00000045730	http://amigo.geneontology.org/cgi-bin/amigo/term_details?term=GO:0036294
negative regulation of hormone secretion	Gene Ontology	GO:0046888	5	79	0.004518	0.0306466	ENSMUSG00000035828|ENSMUSG00000027398|ENSMUSG00000047250|ENSMUSG00000058755|ENSMUSG00000033685	http://amigo.geneontology.org/cgi-bin/amigo/term_details?term=GO:0046888
negative regulation of vasculature development	Gene Ontology	GO:1901343	5	79	0.004518	0.0306466	ENSMUSG00000024066|ENSMUSG00000032484|ENSMUSG00000022018|ENSMUSG00000036144|ENSMUSG00000045730	http://amigo.geneontology.org/cgi-bin/amigo/term_details?term=GO:1901343
response to fibroblast growth factor	Gene Ontology	GO:0071774	5	79	0.004518	0.0306466	ENSMUSG00000005320|ENSMUSG00000023034|ENSMUSG00000044786|ENSMUSG00000046743|ENSMUSG00000044461	http://amigo.geneontology.org/cgi-bin/amigo/term_details?term=GO:0071774
negative regulation of nucleic acid-templated transcription	Gene Ontology	GO:1903507	22	909	0.004522	0.0306466	ENSMUSG00000049892|ENSMUSG00000056501|ENSMUSG00000038402|ENSMUSG00000055116|ENSMUSG00000052837|ENSMUSG00000043099|ENSMUSG00000031431|ENSMUSG00000047146|ENSMUSG00000044786|ENSMUSG00000020893|ENSMUSG00000020593|ENSMUSG00000048756|ENSMUSG00000020423|ENSMUSG00000024042|ENSMUSG00000057604|ENSMUSG00000056749|ENSMUSG00000027398|ENSMUSG00000063632|ENSMUSG00000026628|ENSMUSG00000035456|ENSMUSG00000019768|…	http://amigo.geneontology.org/cgi-bin/amigo/term_details?term=GO:1903507
regulation of tumor necrosis factor superfamily cytokine production	Gene Ontology	GO:1903555	6	114	0.00454056	0.0307334	ENSMUSG00000027843|ENSMUSG00000025473|ENSMUSG00000032496|ENSMUSG00000028967|ENSMUSG00000044786|ENSMUSG00000034641	http://amigo.geneontology.org/cgi-bin/amigo/term_details?term=GO:1903555
labyrinthine layer development	Gene Ontology	GO:0060711	4	49	0.00472074	0.0319065	ENSMUSG00000053113|ENSMUSG00000010797|ENSMUSG00000030790|ENSMUSG00000052837	http://amigo.geneontology.org/cgi-bin/amigo/term_details?term=GO:0060711
regulation of protein kinase B signaling	Gene Ontology	GO:0051896	6	115	0.0047273	0.0319065	ENSMUSG00000020053|ENSMUSG00000038332|ENSMUSG00000024066|ENSMUSG00000025473|ENSMUSG00000028128|ENSMUSG00000037922	http://amigo.geneontology.org/cgi-bin/amigo/term_details?term=GO:0051896
transmembrane receptor activity	Gene Ontology	GO:0099600	21	856	0.00473174	0.0319065	ENSMUSG00000045092|ENSMUSG00000021886|ENSMUSG00000039167|ENSMUSG00000027947|ENSMUSG00000033998|ENSMUSG00000025804|ENSMUSG00000003882|ENSMUSG00000047875|ENSMUSG00000028128|ENSMUSG00000045730|ENSMUSG00000026068|ENSMUSG00000049130|ENSMUSG00000045613|ENSMUSG00000024778|ENSMUSG00000045502|ENSMUSG00000005320|ENSMUSG00000071713|ENSMUSG00000028859|ENSMUSG00000026180|ENSMUSG00000026073|ENSMUSG00000061878	http://amigo.geneontology.org/cgi-bin/amigo/term_details?term=GO:0099600
organic hydroxy compound metabolic process	Gene Ontology	GO:1901615	11	330	0.00475407	0.0320167	ENSMUSG00000027513|ENSMUSG00000003484|ENSMUSG00000027952|ENSMUSG00000024210|ENSMUSG00000027875|ENSMUSG00000005320|ENSMUSG00000028003|ENSMUSG00000029273|ENSMUSG00000027360|ENSMUSG00000027398|ENSMUSG00000061878	http://amigo.geneontology.org/cgi-bin/amigo/term_details?term=GO:1901615
positive regulation of T cell activation	Gene Ontology	GO:0050870	7	154	0.00482315	0.0324411	ENSMUSG00000020053|ENSMUSG00000027843|ENSMUSG00000003882|ENSMUSG00000031217|ENSMUSG00000025473|ENSMUSG00000027398|ENSMUSG00000005824	http://amigo.geneontology.org/cgi-bin/amigo/term_details?term=GO:0050870
regulation of hair cycle	Gene Ontology	GO:0042634	3	24	0.00484733	0.0325221	ENSMUSG00000055116|ENSMUSG00000020893|ENSMUSG00000021765	http://amigo.geneontology.org/cgi-bin/amigo/term_details?term=GO:0042634
cellular calcium ion homeostasis	Gene Ontology	GO:0006874	11	331	0.00485768	0.0325507	ENSMUSG00000045092|ENSMUSG00000044026|ENSMUSG00000014813|ENSMUSG00000026576|ENSMUSG00000025804|ENSMUSG00000030790|ENSMUSG00000049130|ENSMUSG00000031770|ENSMUSG00000019768|ENSMUSG00000027398|ENSMUSG00000026180	http://amigo.geneontology.org/cgi-bin/amigo/term_details?term=GO:0006874
viral process	Gene Ontology	GO:0016032	13	429	0.00486918	0.032587	ENSMUSG00000032661|ENSMUSG00000026576|ENSMUSG00000042265|ENSMUSG00000027843|ENSMUSG00000033777|ENSMUSG00000017737|ENSMUSG00000078566|ENSMUSG00000017707|ENSMUSG00000057604|ENSMUSG00000032496|ENSMUSG00000007659|ENSMUSG00000020108|ENSMUSG00000019577	http://amigo.geneontology.org/cgi-bin/amigo/term_details?term=GO:0016032
regulation of T cell activation	Gene Ontology	GO:0050863	9	239	0.00488071	0.0326234	ENSMUSG00000020053|ENSMUSG00000027843|ENSMUSG00000003882|ENSMUSG00000031217|ENSMUSG00000056501|ENSMUSG00000025473|ENSMUSG00000027398|ENSMUSG00000005824|ENSMUSG00000053965	http://amigo.geneontology.org/cgi-bin/amigo/term_details?term=GO:0050863
regulation of fat cell differentiation	Gene Ontology	GO:0045598	6	116	0.00491963	0.0327608	ENSMUSG00000020053|ENSMUSG00000000901|ENSMUSG00000044786|ENSMUSG00000056501|ENSMUSG00000055116|ENSMUSG00000020593	http://amigo.geneontology.org/cgi-bin/amigo/term_details?term=GO:0045598
striated muscle contraction	Gene Ontology	GO:0006941	6	116	0.00491963	0.0327608	ENSMUSG00000057123|ENSMUSG00000026576|ENSMUSG00000040907|ENSMUSG00000045730|ENSMUSG00000014813|ENSMUSG00000053965	http://amigo.geneontology.org/cgi-bin/amigo/term_details?term=GO:0006941
tumor necrosis factor superfamily cytokine production	Gene Ontology	GO:0071706	6	116	0.00491963	0.0327608	ENSMUSG00000027843|ENSMUSG00000025473|ENSMUSG00000032496|ENSMUSG00000028967|ENSMUSG00000044786|ENSMUSG00000034641	http://amigo.geneontology.org/cgi-bin/amigo/term_details?term=GO:0071706
monosaccharide metabolic process	Gene Ontology	GO:0005996	8	196	0.00494193	0.032866	ENSMUSG00000020053|ENSMUSG00000027513|ENSMUSG00000028893|ENSMUSG00000024042|ENSMUSG00000026628|ENSMUSG00000020427|ENSMUSG00000000628|ENSMUSG00000019577	http://amigo.geneontology.org/cgi-bin/amigo/term_details?term=GO:0005996
negative regulation of cell differentiation	Gene Ontology	GO:0045596	16	585	0.00494771	0.032866	ENSMUSG00000020053|ENSMUSG00000024066|ENSMUSG00000048756|ENSMUSG00000037962|ENSMUSG00000028211|ENSMUSG00000030093|ENSMUSG00000000901|ENSMUSG00000001227|ENSMUSG00000055116|ENSMUSG00000021508|ENSMUSG00000044786|ENSMUSG00000019122|ENSMUSG00000021025|ENSMUSG00000027398|ENSMUSG00000063632|ENSMUSG00000021765	http://amigo.geneontology.org/cgi-bin/amigo/term_details?term=GO:0045596
organ growth	Gene Ontology	GO:0035265	7	155	0.00498718	0.0329197	ENSMUSG00000020053|ENSMUSG00000045092|ENSMUSG00000010797|ENSMUSG00000005124|ENSMUSG00000019768|ENSMUSG00000045672|ENSMUSG00000014813	http://amigo.geneontology.org/cgi-bin/amigo/term_details?term=GO:0035265
catabolic process	Gene Ontology	GO:0009056	31	1449	0.00498777	0.0329197	ENSMUSG00000024066|ENSMUSG00000000901|ENSMUSG00000058624|ENSMUSG00000031770|ENSMUSG00000005800|ENSMUSG00000055116|ENSMUSG00000015568|ENSMUSG00000053965|ENSMUSG00000003484|ENSMUSG00000026480|ENSMUSG00000045730|ENSMUSG00000020593|ENSMUSG00000036661|ENSMUSG00000025509|ENSMUSG00000020053|ENSMUSG00000028194|ENSMUSG00000020423|ENSMUSG00000020427|ENSMUSG00000042807|ENSMUSG00000023913|ENSMUSG00000045502|…	http://amigo.geneontology.org/cgi-bin/amigo/term_details?term=GO:0009056
toll-like receptor signaling pathway	Gene Ontology	GO:0002224	5	81	0.00499267	0.0329197	ENSMUSG00000021025|ENSMUSG00000033777|ENSMUSG00000032496|ENSMUSG00000019768|ENSMUSG00000027843	http://amigo.geneontology.org/cgi-bin/amigo/term_details?term=GO:0002224
regulation of endothelial cell proliferation	Gene Ontology	GO:0001936	5	81	0.00499267	0.0329197	ENSMUSG00000024066|ENSMUSG00000023034|ENSMUSG00000028128|ENSMUSG00000010797|ENSMUSG00000022018	http://amigo.geneontology.org/cgi-bin/amigo/term_details?term=GO:0001936
regulation of leukocyte apoptotic process	Gene Ontology	GO:2000106	5	81	0.00499267	0.0329197	ENSMUSG00000025473|ENSMUSG00000026180|ENSMUSG00000024778|ENSMUSG00000045502|ENSMUSG00000031431	http://amigo.geneontology.org/cgi-bin/amigo/term_details?term=GO:2000106
regulation of cardiac muscle contraction	Gene Ontology	GO:0055117	4	50	0.00504787	0.0332427	ENSMUSG00000053965|ENSMUSG00000057123|ENSMUSG00000014813|ENSMUSG00000026576	http://amigo.geneontology.org/cgi-bin/amigo/term_details?term=GO:0055117
regulation of cellular amide metabolic process	Gene Ontology	GO:0034248	10	286	0.00507806	0.0333775	ENSMUSG00000020053|ENSMUSG00000048756|ENSMUSG00000028893|ENSMUSG00000076431|ENSMUSG00000020423|ENSMUSG00000044786|ENSMUSG00000019768|ENSMUSG00000056071|ENSMUSG00000037922|ENSMUSG00000020893	http://amigo.geneontology.org/cgi-bin/amigo/term_details?term=GO:0034248
extracellular matrix organization	Gene Ontology	GO:0030198	8	197	0.00508705	0.0333775	ENSMUSG00000024529|ENSMUSG00000000901|ENSMUSG00000017737|ENSMUSG00000005320|ENSMUSG00000038402|ENSMUSG00000045672|ENSMUSG00000049001|ENSMUSG00000022018	http://amigo.geneontology.org/cgi-bin/amigo/term_details?term=GO:0030198
cellular response to lipopolysaccharide	Gene Ontology	GO:0071222	6	117	0.00511765	0.0335372	ENSMUSG00000027843|ENSMUSG00000032496|ENSMUSG00000044786|ENSMUSG00000056501|ENSMUSG00000021025|ENSMUSG00000027398	http://amigo.geneontology.org/cgi-bin/amigo/term_details?term=GO:0071222
extracellular structure organization	Gene Ontology	GO:0043062	8	198	0.00523541	0.0342316	ENSMUSG00000024529|ENSMUSG00000000901|ENSMUSG00000017737|ENSMUSG00000005320|ENSMUSG00000038402|ENSMUSG00000045672|ENSMUSG00000049001|ENSMUSG00000022018	http://amigo.geneontology.org/cgi-bin/amigo/term_details?term=GO:0043062
negative regulation of RNA biosynthetic process	Gene Ontology	GO:1902679	22	921	0.00523945	0.0342316	ENSMUSG00000049892|ENSMUSG00000056501|ENSMUSG00000038402|ENSMUSG00000055116|ENSMUSG00000052837|ENSMUSG00000043099|ENSMUSG00000031431|ENSMUSG00000047146|ENSMUSG00000044786|ENSMUSG00000020893|ENSMUSG00000020593|ENSMUSG00000048756|ENSMUSG00000020423|ENSMUSG00000024042|ENSMUSG00000057604|ENSMUSG00000056749|ENSMUSG00000027398|ENSMUSG00000063632|ENSMUSG00000026628|ENSMUSG00000035456|ENSMUSG00000019768|…	http://amigo.geneontology.org/cgi-bin/amigo/term_details?term=GO:1902679
positive regulation of smooth muscle cell proliferation	Gene Ontology	GO:0048661	5	82	0.0052428	0.0342316	ENSMUSG00000020053|ENSMUSG00000045092|ENSMUSG00000027947|ENSMUSG00000017737|ENSMUSG00000005124	http://amigo.geneontology.org/cgi-bin/amigo/term_details?term=GO:0048661
intracellular part	Gene Ontology	GO:0044424	167	11083	0.00533287	0.0347773	ENSMUSG00000049892|ENSMUSG00000030350|ENSMUSG00000031770|ENSMUSG00000024190|ENSMUSG00000057719|ENSMUSG00000019577|ENSMUSG00000003484|ENSMUSG00000027843|ENSMUSG00000052837|ENSMUSG00000040907|ENSMUSG00000020387|ENSMUSG00000056602|ENSMUSG00000042510|ENSMUSG00000053113|ENSMUSG00000040055|ENSMUSG00000055116|ENSMUSG00000063632|ENSMUSG00000020593|ENSMUSG00000027068|ENSMUSG00000010797|ENSMUSG00000028337|…	http://amigo.geneontology.org/cgi-bin/amigo/term_details?term=GO:0044424
positive regulation of lipid catabolic process	Gene Ontology	GO:0050996	3	25	0.00537813	0.0348097	ENSMUSG00000027398|ENSMUSG00000045730|ENSMUSG00000025509	http://amigo.geneontology.org/cgi-bin/amigo/term_details?term=GO:0050996
positive regulation of acute inflammatory response	Gene Ontology	GO:0002675	3	25	0.00537813	0.0348097	ENSMUSG00000025473|ENSMUSG00000060063|ENSMUSG00000027398	http://amigo.geneontology.org/cgi-bin/amigo/term_details?term=GO:0002675
regulation of p38MAPK cascade	Gene Ontology	GO:1900744	3	25	0.00537813	0.0348097	ENSMUSG00000024066|ENSMUSG00000020893|ENSMUSG00000027843	http://amigo.geneontology.org/cgi-bin/amigo/term_details?term=GO:1900744
multicellular organism catabolic process	Gene Ontology	GO:0044243	3	25	0.00537813	0.0348097	ENSMUSG00000000901|ENSMUSG00000017737|ENSMUSG00000005800	http://amigo.geneontology.org/cgi-bin/amigo/term_details?term=GO:0044243
isoprenoid biosynthetic process	Gene Ontology	GO:0008299	3	25	0.00537813	0.0348097	ENSMUSG00000027952|ENSMUSG00000027875|ENSMUSG00000027068	http://amigo.geneontology.org/cgi-bin/amigo/term_details?term=GO:0008299
regulation of interleukin-1 production	Gene Ontology	GO:0032652	4	51	0.00538985	0.0348097	ENSMUSG00000028967|ENSMUSG00000078817|ENSMUSG00000026073|ENSMUSG00000061878	http://amigo.geneontology.org/cgi-bin/amigo/term_details?term=GO:0032652
regulation of lipid catabolic process	Gene Ontology	GO:0050994	4	51	0.00538985	0.0348097	ENSMUSG00000027398|ENSMUSG00000045730|ENSMUSG00000045502|ENSMUSG00000025509	http://amigo.geneontology.org/cgi-bin/amigo/term_details?term=GO:0050994
regulation of epidermal growth factor receptor signaling pathway	Gene Ontology	GO:0042058	4	51	0.00538985	0.0348097	ENSMUSG00000017737|ENSMUSG00000028967|ENSMUSG00000046223|ENSMUSG00000019768	http://amigo.geneontology.org/cgi-bin/amigo/term_details?term=GO:0042058
lymphocyte proliferation	Gene Ontology	GO:0046651	9	243	0.00540741	0.0348811	ENSMUSG00000020053|ENSMUSG00000027843|ENSMUSG00000003882|ENSMUSG00000023067|ENSMUSG00000031217|ENSMUSG00000056501|ENSMUSG00000053965|ENSMUSG00000027398|ENSMUSG00000063632	http://amigo.geneontology.org/cgi-bin/amigo/term_details?term=GO:0046651
pyruvate metabolic process	Gene Ontology	GO:0006090	5	83	0.00550166	0.0351469	ENSMUSG00000020053|ENSMUSG00000020108|ENSMUSG00000000628|ENSMUSG00000027513|ENSMUSG00000019577	http://amigo.geneontology.org/cgi-bin/amigo/term_details?term=GO:0006090
associative learning	Gene Ontology	GO:0008306	5	83	0.00550166	0.0351469	ENSMUSG00000040907|ENSMUSG00000020423|ENSMUSG00000061718|ENSMUSG00000019970|ENSMUSG00000045730	http://amigo.geneontology.org/cgi-bin/amigo/term_details?term=GO:0008306
positive regulation of neuron death	Gene Ontology	GO:1901216	5	83	0.00550166	0.0351469	ENSMUSG00000048756|ENSMUSG00000020108|ENSMUSG00000024521|ENSMUSG00000026480|ENSMUSG00000027398	http://amigo.geneontology.org/cgi-bin/amigo/term_details?term=GO:1901216
regulation of fibroblast growth factor production	Gene Ontology	GO:0090270	2	7	0.00554709	0.0351469	ENSMUSG00000005320|ENSMUSG00000022018	http://amigo.geneontology.org/cgi-bin/amigo/term_details?term=GO:0090270
interleukin-1 receptor activity	Gene Ontology	GO:0004908	2	7	0.00554709	0.0351469	ENSMUSG00000026068|ENSMUSG00000026073	http://amigo.geneontology.org/cgi-bin/amigo/term_details?term=GO:0004908
interleukin-1 binding	Gene Ontology	GO:0019966	2	7	0.00554709	0.0351469	ENSMUSG00000026981|ENSMUSG00000026073	http://amigo.geneontology.org/cgi-bin/amigo/term_details?term=GO:0019966
fibroblast growth factor production	Gene Ontology	GO:0090269	2	7	0.00554709	0.0351469	ENSMUSG00000005320|ENSMUSG00000022018	http://amigo.geneontology.org/cgi-bin/amigo/term_details?term=GO:0090269
regulation of macromitophagy	Gene Ontology	GO:1901524	2	7	0.00554709	0.0351469	ENSMUSG00000000628|ENSMUSG00000045730	http://amigo.geneontology.org/cgi-bin/amigo/term_details?term=GO:1901524
antral ovarian follicle growth	Gene Ontology	GO:0001547	2	7	0.00554709	0.0351469	ENSMUSG00000048756|ENSMUSG00000019768	http://amigo.geneontology.org/cgi-bin/amigo/term_details?term=GO:0001547
RAGE receptor binding	Gene Ontology	GO:0050786	2	7	0.00554709	0.0351469	ENSMUSG00000056071|ENSMUSG00000056054	http://amigo.geneontology.org/cgi-bin/amigo/term_details?term=GO:0050786
purine nucleobase catabolic process	Gene Ontology	GO:0006145	2	7	0.00554709	0.0351469	ENSMUSG00000024066|ENSMUSG00000058624	http://amigo.geneontology.org/cgi-bin/amigo/term_details?term=GO:0006145
prostate glandular acinus morphogenesis	Gene Ontology	GO:0060526	2	7	0.00554709	0.0351469	ENSMUSG00000020053|ENSMUSG00000019768	http://amigo.geneontology.org/cgi-bin/amigo/term_details?term=GO:0060526
prostate epithelial cord arborization involved in prostate glandular acinus morphogenesis	Gene Ontology	GO:0060527	2	7	0.00554709	0.0351469	ENSMUSG00000020053|ENSMUSG00000019768	http://amigo.geneontology.org/cgi-bin/amigo/term_details?term=GO:0060527
autophagic cell death	Gene Ontology	GO:0048102	2	7	0.00554709	0.0351469	ENSMUSG00000028211|ENSMUSG00000078566	http://amigo.geneontology.org/cgi-bin/amigo/term_details?term=GO:0048102
negative regulation of triglyceride metabolic process	Gene Ontology	GO:0090209	2	7	0.00554709	0.0351469	ENSMUSG00000024042|ENSMUSG00000019768	http://amigo.geneontology.org/cgi-bin/amigo/term_details?term=GO:0090209
cellular component organization	Gene Ontology	GO:0016043	82	4849	0.00568008	0.035864	ENSMUSG00000038332|ENSMUSG00000057123|ENSMUSG00000036295|ENSMUSG00000033855|ENSMUSG00000005124|ENSMUSG00000030093|ENSMUSG00000019970|ENSMUSG00000000901|ENSMUSG00000038402|ENSMUSG00000030790|ENSMUSG00000058624|ENSMUSG00000029576|ENSMUSG00000071713|ENSMUSG00000060063|ENSMUSG00000058755|ENSMUSG00000056071|ENSMUSG00000015568|ENSMUSG00000020848|ENSMUSG00000025330|ENSMUSG00000037962|ENSMUSG00000021886|…	http://amigo.geneontology.org/cgi-bin/amigo/term_details?term=GO:0016043
glycosaminoglycan binding	Gene Ontology	GO:0005539	7	159	0.00568555	0.035864	ENSMUSG00000027656|ENSMUSG00000005124|ENSMUSG00000033453|ENSMUSG00000032496|ENSMUSG00000005320|ENSMUSG00000015568|ENSMUSG00000049001	http://amigo.geneontology.org/cgi-bin/amigo/term_details?term=GO:0005539
mononuclear cell proliferation	Gene Ontology	GO:0032943	9	245	0.00568674	0.035864	ENSMUSG00000020053|ENSMUSG00000027843|ENSMUSG00000003882|ENSMUSG00000023067|ENSMUSG00000031217|ENSMUSG00000056501|ENSMUSG00000053965|ENSMUSG00000027398|ENSMUSG00000063632	http://amigo.geneontology.org/cgi-bin/amigo/term_details?term=GO:0032943
cellular macromolecule biosynthetic process	Gene Ontology	GO:0034645	64	3608	0.00568707	0.035864	ENSMUSG00000045092|ENSMUSG00000025789|ENSMUSG00000030093|ENSMUSG00000030074|ENSMUSG00000028211|ENSMUSG00000049892|ENSMUSG00000024042|ENSMUSG00000061718|ENSMUSG00000058755|ENSMUSG00000038402|ENSMUSG00000055116|ENSMUSG00000038342|ENSMUSG00000027513|ENSMUSG00000025330|ENSMUSG00000033685|ENSMUSG00000048756|ENSMUSG00000052837|ENSMUSG00000043099|ENSMUSG00000040740|ENSMUSG00000031431|ENSMUSG00000045730|…	http://amigo.geneontology.org/cgi-bin/amigo/term_details?term=GO:0034645
I-kappaB kinase/NF-kappaB signaling	Gene Ontology	GO:0007249	8	201	0.00570039	0.0359057	ENSMUSG00000032496|ENSMUSG00000019768|ENSMUSG00000078817|ENSMUSG00000021025|ENSMUSG00000027398|ENSMUSG00000005824|ENSMUSG00000020893|ENSMUSG00000061878	http://amigo.geneontology.org/cgi-bin/amigo/term_details?term=GO:0007249
organic cyclic compound metabolic process	Gene Ontology	GO:1901360	77	4502	0.00572725	0.0360325	ENSMUSG00000024066|ENSMUSG00000032661|ENSMUSG00000030093|ENSMUSG00000027952|ENSMUSG00000028211|ENSMUSG00000064120|ENSMUSG00000049892|ENSMUSG00000030790|ENSMUSG00000058624|ENSMUSG00000055116|ENSMUSG00000061718|ENSMUSG00000058755|ENSMUSG00000038402|ENSMUSG00000027398|ENSMUSG00000038342|ENSMUSG00000027513|ENSMUSG00000053965|ENSMUSG00000025330|ENSMUSG00000026077|ENSMUSG00000021886|ENSMUSG00000003484|…	http://amigo.geneontology.org/cgi-bin/amigo/term_details?term=GO:1901360
regulation of striated muscle tissue development	Gene Ontology	GO:0016202	6	120	0.00574681	0.0360645	ENSMUSG00000020053|ENSMUSG00000010797|ENSMUSG00000005124|ENSMUSG00000031431|ENSMUSG00000045730|ENSMUSG00000055116	http://amigo.geneontology.org/cgi-bin/amigo/term_details?term=GO:0016202
regulation of myoblast differentiation	Gene Ontology	GO:0045661	4	52	0.00574698	0.0360645	ENSMUSG00000021508|ENSMUSG00000005824|ENSMUSG00000019122|ENSMUSG00000020427	http://amigo.geneontology.org/cgi-bin/amigo/term_details?term=GO:0045661
nucleocytoplasmic transport	Gene Ontology	GO:0006913	11	339	0.00575253	0.0360645	ENSMUSG00000020053|ENSMUSG00000038342|ENSMUSG00000027843|ENSMUSG00000076431|ENSMUSG00000023067|ENSMUSG00000055116|ENSMUSG00000078817|ENSMUSG00000021025|ENSMUSG00000027398|ENSMUSG00000005824|ENSMUSG00000061878	http://amigo.geneontology.org/cgi-bin/amigo/term_details?term=GO:0006913
detoxification	Gene Ontology	GO:0098754	3	26	0.0059425	0.037029	ENSMUSG00000038332|ENSMUSG00000031765|ENSMUSG00000031762	http://amigo.geneontology.org/cgi-bin/amigo/term_details?term=GO:0098754
positive regulation of lymphocyte migration	Gene Ontology	GO:2000403	3	26	0.0059425	0.037029	ENSMUSG00000025473|ENSMUSG00000021508|ENSMUSG00000005824	http://amigo.geneontology.org/cgi-bin/amigo/term_details?term=GO:2000403
osteoblast proliferation	Gene Ontology	GO:0033687	3	26	0.0059425	0.037029	ENSMUSG00000054675|ENSMUSG00000032496|ENSMUSG00000052837	http://amigo.geneontology.org/cgi-bin/amigo/term_details?term=GO:0033687
negative regulation of anion transport	Gene Ontology	GO:1903792	3	26	0.0059425	0.037029	ENSMUSG00000027398|ENSMUSG00000026981|ENSMUSG00000003484	http://amigo.geneontology.org/cgi-bin/amigo/term_details?term=GO:1903792
antimicrobial humoral response	Gene Ontology	GO:0019730	3	26	0.0059425	0.037029	ENSMUSG00000032496|ENSMUSG00000030790|ENSMUSG00000027483	http://amigo.geneontology.org/cgi-bin/amigo/term_details?term=GO:0019730
regulation of growth	Gene Ontology	GO:0040008	16	597	0.00594788	0.037029	ENSMUSG00000020053|ENSMUSG00000038332|ENSMUSG00000027656|ENSMUSG00000028893|ENSMUSG00000005124|ENSMUSG00000038264|ENSMUSG00000019970|ENSMUSG00000023067|ENSMUSG00000020427|ENSMUSG00000001227|ENSMUSG00000045730|ENSMUSG00000053113|ENSMUSG00000058755|ENSMUSG00000071713|ENSMUSG00000010797|ENSMUSG00000061878	http://amigo.geneontology.org/cgi-bin/amigo/term_details?term=GO:0040008
transmembrane signaling receptor activity	Gene Ontology	GO:0004888	20	818	0.00598274	0.0372028	ENSMUSG00000045092|ENSMUSG00000021886|ENSMUSG00000039167|ENSMUSG00000027947|ENSMUSG00000025804|ENSMUSG00000003882|ENSMUSG00000047875|ENSMUSG00000028128|ENSMUSG00000045730|ENSMUSG00000026068|ENSMUSG00000049130|ENSMUSG00000045613|ENSMUSG00000024778|ENSMUSG00000045502|ENSMUSG00000005320|ENSMUSG00000071713|ENSMUSG00000028859|ENSMUSG00000026180|ENSMUSG00000026073|ENSMUSG00000061878	http://amigo.geneontology.org/cgi-bin/amigo/term_details?term=GO:0004888
positive regulation of reactive oxygen species metabolic process	Gene Ontology	GO:2000379	5	85	0.00604624	0.037554	ENSMUSG00000024066|ENSMUSG00000048756|ENSMUSG00000023067|ENSMUSG00000028194|ENSMUSG00000027398	http://amigo.geneontology.org/cgi-bin/amigo/term_details?term=GO:2000379
cellular response to amino acid stimulus	Gene Ontology	GO:0071230	4	53	0.00611955	0.0379227	ENSMUSG00000038332|ENSMUSG00000028893|ENSMUSG00000056501|ENSMUSG00000007659	http://amigo.geneontology.org/cgi-bin/amigo/term_details?term=GO:0071230
nuclear transport	Gene Ontology	GO:0051169	11	342	0.00611977	0.0379227	ENSMUSG00000020053|ENSMUSG00000038342|ENSMUSG00000027843|ENSMUSG00000076431|ENSMUSG00000023067|ENSMUSG00000055116|ENSMUSG00000078817|ENSMUSG00000021025|ENSMUSG00000027398|ENSMUSG00000005824|ENSMUSG00000061878	http://amigo.geneontology.org/cgi-bin/amigo/term_details?term=GO:0051169
stress-activated protein kinase signaling cascade	Gene Ontology	GO:0031098	8	204	0.0061962	0.0382169	ENSMUSG00000024066|ENSMUSG00000030093|ENSMUSG00000026981|ENSMUSG00000027843|ENSMUSG00000028967|ENSMUSG00000044786|ENSMUSG00000027398|ENSMUSG00000020893	http://amigo.geneontology.org/cgi-bin/amigo/term_details?term=GO:0031098
lipase activity	Gene Ontology	GO:0016298	6	122	0.00619646	0.0382169	ENSMUSG00000025804|ENSMUSG00000023913|ENSMUSG00000057074|ENSMUSG00000015568|ENSMUSG00000053965|ENSMUSG00000025509	http://amigo.geneontology.org/cgi-bin/amigo/term_details?term=GO:0016298
regulation of muscle organ development	Gene Ontology	GO:0048634	6	122	0.00619646	0.0382169	ENSMUSG00000020053|ENSMUSG00000010797|ENSMUSG00000005124|ENSMUSG00000031431|ENSMUSG00000045730|ENSMUSG00000055116	http://amigo.geneontology.org/cgi-bin/amigo/term_details?term=GO:0048634
regulation of cellular carbohydrate metabolic process	Gene Ontology	GO:0010675	6	122	0.00619646	0.0382169	ENSMUSG00000020053|ENSMUSG00000028893|ENSMUSG00000024042|ENSMUSG00000020427|ENSMUSG00000020108|ENSMUSG00000019577	http://amigo.geneontology.org/cgi-bin/amigo/term_details?term=GO:0010675
regulation of cellular component organization	Gene Ontology	GO:0051128	40	2036	0.00620293	0.0382169	ENSMUSG00000038332|ENSMUSG00000036295|ENSMUSG00000030093|ENSMUSG00000019970|ENSMUSG00000033855|ENSMUSG00000058624|ENSMUSG00000058755|ENSMUSG00000027398|ENSMUSG00000005824|ENSMUSG00000020848|ENSMUSG00000021886|ENSMUSG00000046223|ENSMUSG00000045730|ENSMUSG00000047146|ENSMUSG00000078566|ENSMUSG00000037447|ENSMUSG00000005320|ENSMUSG00000071713|ENSMUSG00000049001|ENSMUSG00000020593|ENSMUSG00000039304|…	http://amigo.geneontology.org/cgi-bin/amigo/term_details?term=GO:0051128
negative regulation of proteolysis	Gene Ontology	GO:0045861	9	249	0.00627875	0.0385952	ENSMUSG00000020053|ENSMUSG00000046223|ENSMUSG00000032484|ENSMUSG00000079012|ENSMUSG00000017737|ENSMUSG00000031770|ENSMUSG00000023034|ENSMUSG00000066361|ENSMUSG00000026073	http://amigo.geneontology.org/cgi-bin/amigo/term_details?term=GO:0045861
lipid catabolic process	Gene Ontology	GO:0016042	9	249	0.00627875	0.0385952	ENSMUSG00000003484|ENSMUSG00000028893|ENSMUSG00000045730|ENSMUSG00000023913|ENSMUSG00000045502|ENSMUSG00000027398|ENSMUSG00000015568|ENSMUSG00000020593|ENSMUSG00000025509	http://amigo.geneontology.org/cgi-bin/amigo/term_details?term=GO:0016042
response to toxic substance	Gene Ontology	GO:0009636	5	86	0.00633227	0.0388795	ENSMUSG00000027737|ENSMUSG00000038332|ENSMUSG00000031765|ENSMUSG00000024778|ENSMUSG00000031762	http://amigo.geneontology.org/cgi-bin/amigo/term_details?term=GO:0009636
calcium ion homeostasis	Gene Ontology	GO:0055074	11	344	0.00637466	0.039095	ENSMUSG00000045092|ENSMUSG00000044026|ENSMUSG00000014813|ENSMUSG00000026576|ENSMUSG00000025804|ENSMUSG00000030790|ENSMUSG00000049130|ENSMUSG00000031770|ENSMUSG00000019768|ENSMUSG00000027398|ENSMUSG00000026180	http://amigo.geneontology.org/cgi-bin/amigo/term_details?term=GO:0055074
regulation of muscle tissue development	Gene Ontology	GO:1901861	6	123	0.00643065	0.0393932	ENSMUSG00000020053|ENSMUSG00000010797|ENSMUSG00000005124|ENSMUSG00000031431|ENSMUSG00000045730|ENSMUSG00000055116	http://amigo.geneontology.org/cgi-bin/amigo/term_details?term=GO:1901861
positive regulation of leukocyte cell-cell adhesion	Gene Ontology	GO:1903039	7	163	0.00645467	0.0394952	ENSMUSG00000020053|ENSMUSG00000027843|ENSMUSG00000003882|ENSMUSG00000031217|ENSMUSG00000025473|ENSMUSG00000027398|ENSMUSG00000005824	http://amigo.geneontology.org/cgi-bin/amigo/term_details?term=GO:1903039
regulation of ERBB signaling pathway	Gene Ontology	GO:1901184	4	54	0.00650783	0.0396844	ENSMUSG00000017737|ENSMUSG00000028967|ENSMUSG00000046223|ENSMUSG00000019768	http://amigo.geneontology.org/cgi-bin/amigo/term_details?term=GO:1901184
monocarboxylic acid binding	Gene Ontology	GO:0033293	4	54	0.00650783	0.0396844	ENSMUSG00000056071|ENSMUSG00000056054|ENSMUSG00000028003|ENSMUSG00000060063	http://amigo.geneontology.org/cgi-bin/amigo/term_details?term=GO:0033293
positive regulation of lipid transport	Gene Ontology	GO:0032370	4	54	0.00650783	0.0396844	ENSMUSG00000021025|ENSMUSG00000027398|ENSMUSG00000003484|ENSMUSG00000028003	http://amigo.geneontology.org/cgi-bin/amigo/term_details?term=GO:0032370
insulin-like growth factor binding	Gene Ontology	GO:0005520	3	27	0.00654097	0.039727	ENSMUSG00000027656|ENSMUSG00000020427|ENSMUSG00000005124	http://amigo.geneontology.org/cgi-bin/amigo/term_details?term=GO:0005520
acylglycerol homeostasis	Gene Ontology	GO:0055090	3	27	0.00654097	0.039727	ENSMUSG00000015568|ENSMUSG00000028893|ENSMUSG00000002289	http://amigo.geneontology.org/cgi-bin/amigo/term_details?term=GO:0055090
triglyceride homeostasis	Gene Ontology	GO:0070328	3	27	0.00654097	0.039727	ENSMUSG00000015568|ENSMUSG00000028893|ENSMUSG00000002289	http://amigo.geneontology.org/cgi-bin/amigo/term_details?term=GO:0070328
organelle	Gene Ontology	GO:0043226	160	10598	0.00656707	0.0398189	ENSMUSG00000049892|ENSMUSG00000058624|ENSMUSG00000031770|ENSMUSG00000024190|ENSMUSG00000057719|ENSMUSG00000045730|ENSMUSG00000019577|ENSMUSG00000003484|ENSMUSG00000027843|ENSMUSG00000052837|ENSMUSG00000040907|ENSMUSG00000020387|ENSMUSG00000056602|ENSMUSG00000042510|ENSMUSG00000048489|ENSMUSG00000063632|ENSMUSG00000020593|ENSMUSG00000027068|ENSMUSG00000028337|ENSMUSG00000020423|ENSMUSG00000024042|…	http://amigo.geneontology.org/cgi-bin/amigo/term_details?term=GO:0043226
cellular response to nutrient levels	Gene Ontology	GO:0031669	6	124	0.00667119	0.0404045	ENSMUSG00000027513|ENSMUSG00000026473|ENSMUSG00000023067|ENSMUSG00000002289|ENSMUSG00000026628|ENSMUSG00000019577	http://amigo.geneontology.org/cgi-bin/amigo/term_details?term=GO:0031669
sphingosine-1-phosphate receptor activity	Gene Ontology	GO:0038036	2	8	0.00687546	0.0409924	ENSMUSG00000045092|ENSMUSG00000061878	http://amigo.geneontology.org/cgi-bin/amigo/term_details?term=GO:0038036
L-serine transporter activity	Gene Ontology	GO:1905361	2	8	0.00687546	0.0409924	ENSMUSG00000030495|ENSMUSG00000017707	http://amigo.geneontology.org/cgi-bin/amigo/term_details?term=GO:1905361
response to redox state	Gene Ontology	GO:0051775	2	8	0.00687546	0.0409924	ENSMUSG00000055116|ENSMUSG00000026077	http://amigo.geneontology.org/cgi-bin/amigo/term_details?term=GO:0051775
C-C chemokine binding	Gene Ontology	GO:0019957	2	8	0.00687546	0.0409924	ENSMUSG00000044786|ENSMUSG00000025804	http://amigo.geneontology.org/cgi-bin/amigo/term_details?term=GO:0019957
negative regulation of interleukin-1 secretion	Gene Ontology	GO:0050711	2	8	0.00687546	0.0409924	ENSMUSG00000078817|ENSMUSG00000026073	http://amigo.geneontology.org/cgi-bin/amigo/term_details?term=GO:0050711
sodium:potassium-exchanging ATPase complex	Gene Ontology	GO:0005890	2	8	0.00687546	0.0409924	ENSMUSG00000040907|ENSMUSG00000026576	http://amigo.geneontology.org/cgi-bin/amigo/term_details?term=GO:0005890
positive regulation of calcineurin-NFAT signaling cascade	Gene Ontology	GO:0070886	2	8	0.00687546	0.0409924	ENSMUSG00000020053|ENSMUSG00000057604	http://amigo.geneontology.org/cgi-bin/amigo/term_details?term=GO:0070886
neutrophil apoptotic process	Gene Ontology	GO:0001781	2	8	0.00687546	0.0409924	ENSMUSG00000026180|ENSMUSG00000045502	http://amigo.geneontology.org/cgi-bin/amigo/term_details?term=GO:0001781
lung vasculature development	Gene Ontology	GO:0060426	2	8	0.00687546	0.0409924	ENSMUSG00000020053|ENSMUSG00000028967	http://amigo.geneontology.org/cgi-bin/amigo/term_details?term=GO:0060426
negative regulation of insulin secretion involved in cellular response to glucose stimulus	Gene Ontology	GO:0061179	2	8	0.00687546	0.0409924	ENSMUSG00000035828|ENSMUSG00000033685	http://amigo.geneontology.org/cgi-bin/amigo/term_details?term=GO:0061179
L-serine transmembrane transporter activity	Gene Ontology	GO:0015194	2	8	0.00687546	0.0409924	ENSMUSG00000030495|ENSMUSG00000017707	http://amigo.geneontology.org/cgi-bin/amigo/term_details?term=GO:0015194
DNA damage response, signal transduction by p53 class mediator resulting in cell cycle arrest	Gene Ontology	GO:0006977	2	8	0.00687546	0.0409924	ENSMUSG00000023067|ENSMUSG00000076431	http://amigo.geneontology.org/cgi-bin/amigo/term_details?term=GO:0006977
embryonic process involved in female pregnancy	Gene Ontology	GO:0060136	2	8	0.00687546	0.0409924	ENSMUSG00000029802|ENSMUSG00000052837	http://amigo.geneontology.org/cgi-bin/amigo/term_details?term=GO:0060136
serine transmembrane transporter activity	Gene Ontology	GO:0022889	2	8	0.00687546	0.0409924	ENSMUSG00000030495|ENSMUSG00000017707	http://amigo.geneontology.org/cgi-bin/amigo/term_details?term=GO:0022889
regulation of smooth muscle contraction	Gene Ontology	GO:0006940	4	55	0.00691209	0.0410644	ENSMUSG00000045613|ENSMUSG00000047250|ENSMUSG00000061878|ENSMUSG00000045730	http://amigo.geneontology.org/cgi-bin/amigo/term_details?term=GO:0006940
external side of plasma membrane	Gene Ontology	GO:0009897	9	253	0.0069171	0.0410644	ENSMUSG00000045092|ENSMUSG00000038264|ENSMUSG00000079018|ENSMUSG00000025804|ENSMUSG00000004609|ENSMUSG00000026581|ENSMUSG00000030474|ENSMUSG00000003882|ENSMUSG00000024778	http://amigo.geneontology.org/cgi-bin/amigo/term_details?term=GO:0009897
regulation of leukocyte cell-cell adhesion	Gene Ontology	GO:1903037	9	253	0.0069171	0.0410644	ENSMUSG00000020053|ENSMUSG00000027843|ENSMUSG00000003882|ENSMUSG00000031217|ENSMUSG00000056501|ENSMUSG00000025473|ENSMUSG00000027398|ENSMUSG00000005824|ENSMUSG00000053965	http://amigo.geneontology.org/cgi-bin/amigo/term_details?term=GO:1903037
cellular response to molecule of bacterial origin	Gene Ontology	GO:0071219	6	125	0.00691821	0.0410644	ENSMUSG00000027843|ENSMUSG00000032496|ENSMUSG00000044786|ENSMUSG00000056501|ENSMUSG00000021025|ENSMUSG00000027398	http://amigo.geneontology.org/cgi-bin/amigo/term_details?term=GO:0071219
macromolecule biosynthetic process	Gene Ontology	GO:0009059	65	3710	0.00696449	0.0412933	ENSMUSG00000045092|ENSMUSG00000025789|ENSMUSG00000030093|ENSMUSG00000030074|ENSMUSG00000028211|ENSMUSG00000049892|ENSMUSG00000024042|ENSMUSG00000061718|ENSMUSG00000058755|ENSMUSG00000038402|ENSMUSG00000055116|ENSMUSG00000038342|ENSMUSG00000027513|ENSMUSG00000025330|ENSMUSG00000033685|ENSMUSG00000048756|ENSMUSG00000052837|ENSMUSG00000043099|ENSMUSG00000040740|ENSMUSG00000031431|ENSMUSG00000045730|…	http://amigo.geneontology.org/cgi-bin/amigo/term_details?term=GO:0009059
coenzyme metabolic process	Gene Ontology	GO:0006732	9	254	0.0070842	0.0419567	ENSMUSG00000020053|ENSMUSG00000003484|ENSMUSG00000026480|ENSMUSG00000027952|ENSMUSG00000064120|ENSMUSG00000000628|ENSMUSG00000072949|ENSMUSG00000020108|ENSMUSG00000019577	http://amigo.geneontology.org/cgi-bin/amigo/term_details?term=GO:0006732
toll-like receptor 4 signaling pathway	Gene Ontology	GO:0034142	3	28	0.00717405	0.0422551	ENSMUSG00000021025|ENSMUSG00000032496|ENSMUSG00000027843	http://amigo.geneontology.org/cgi-bin/amigo/term_details?term=GO:0034142
regulation of thymocyte aggregation	Gene Ontology	GO:2000398	3	28	0.00717405	0.0422551	ENSMUSG00000003882|ENSMUSG00000027398|ENSMUSG00000025473	http://amigo.geneontology.org/cgi-bin/amigo/term_details?term=GO:2000398
interleukin-6 secretion	Gene Ontology	GO:0072604	3	28	0.00717405	0.0422551	ENSMUSG00000027398|ENSMUSG00000027843|ENSMUSG00000037922	http://amigo.geneontology.org/cgi-bin/amigo/term_details?term=GO:0072604
regulation of T cell differentiation in thymus	Gene Ontology	GO:0033081	3	28	0.00717405	0.0422551	ENSMUSG00000003882|ENSMUSG00000027398|ENSMUSG00000025473	http://amigo.geneontology.org/cgi-bin/amigo/term_details?term=GO:0033081
positive regulation of leukocyte apoptotic process	Gene Ontology	GO:2000108	3	28	0.00717405	0.0422551	ENSMUSG00000025473|ENSMUSG00000024778|ENSMUSG00000045502	http://amigo.geneontology.org/cgi-bin/amigo/term_details?term=GO:2000108
circadian rhythm	Gene Ontology	GO:0007623	7	167	0.00729871	0.0428479	ENSMUSG00000020053|ENSMUSG00000024042|ENSMUSG00000026077|ENSMUSG00000056749|ENSMUSG00000055116|ENSMUSG00000020893|ENSMUSG00000024778	http://amigo.geneontology.org/cgi-bin/amigo/term_details?term=GO:0007623
bone development	Gene Ontology	GO:0060348	7	167	0.00729871	0.0428479	ENSMUSG00000020053|ENSMUSG00000037962|ENSMUSG00000032496|ENSMUSG00000046743|ENSMUSG00000045672|ENSMUSG00000054675|ENSMUSG00000014813	http://amigo.geneontology.org/cgi-bin/amigo/term_details?term=GO:0060348
RNA polymerase II core promoter sequence-specific DNA binding	Gene Ontology	GO:0000979	4	56	0.00733262	0.0429998	ENSMUSG00000021250|ENSMUSG00000056749|ENSMUSG00000063632|ENSMUSG00000056501	http://amigo.geneontology.org/cgi-bin/amigo/term_details?term=GO:0000979
positive regulation of lymphocyte activation	Gene Ontology	GO:0051251	8	211	0.00748008	0.0437209	ENSMUSG00000020053|ENSMUSG00000027843|ENSMUSG00000003882|ENSMUSG00000023067|ENSMUSG00000031217|ENSMUSG00000025473|ENSMUSG00000027398|ENSMUSG00000005824	http://amigo.geneontology.org/cgi-bin/amigo/term_details?term=GO:0051251
regulation of blood circulation	Gene Ontology	GO:1903522	8	211	0.00748008	0.0437209	ENSMUSG00000057123|ENSMUSG00000026576|ENSMUSG00000045613|ENSMUSG00000030790|ENSMUSG00000047250|ENSMUSG00000045730|ENSMUSG00000014813|ENSMUSG00000053965	http://amigo.geneontology.org/cgi-bin/amigo/term_details?term=GO:1903522
extrinsic apoptotic signaling pathway	Gene Ontology	GO:0097191	8	211	0.00748008	0.0437209	ENSMUSG00000020053|ENSMUSG00000048756|ENSMUSG00000026628|ENSMUSG00000040451|ENSMUSG00000039304|ENSMUSG00000007659|ENSMUSG00000027398|ENSMUSG00000024778	http://amigo.geneontology.org/cgi-bin/amigo/term_details?term=GO:0097191
positive regulation of hemopoiesis	Gene Ontology	GO:1903708	7	168	0.00752191	0.0439175	ENSMUSG00000048756|ENSMUSG00000025804|ENSMUSG00000003882|ENSMUSG00000021250|ENSMUSG00000086564|ENSMUSG00000025473|ENSMUSG00000027398	http://amigo.geneontology.org/cgi-bin/amigo/term_details?term=GO:1903708
cardiac muscle contraction	Gene Ontology	GO:0060048	5	90	0.00757157	0.0441592	ENSMUSG00000040907|ENSMUSG00000053965|ENSMUSG00000057123|ENSMUSG00000014813|ENSMUSG00000026576	http://amigo.geneontology.org/cgi-bin/amigo/term_details?term=GO:0060048
leukocyte proliferation	Gene Ontology	GO:0070661	9	257	0.00760409	0.0443007	ENSMUSG00000020053|ENSMUSG00000027843|ENSMUSG00000003882|ENSMUSG00000023067|ENSMUSG00000031217|ENSMUSG00000056501|ENSMUSG00000053965|ENSMUSG00000027398|ENSMUSG00000063632	http://amigo.geneontology.org/cgi-bin/amigo/term_details?term=GO:0070661
lipid binding	Gene Ontology	GO:0008289	15	560	0.00765111	0.0445261	ENSMUSG00000020053|ENSMUSG00000045092|ENSMUSG00000056054|ENSMUSG00000026581|ENSMUSG00000056071|ENSMUSG00000028128|ENSMUSG00000047250|ENSMUSG00000023913|ENSMUSG00000028003|ENSMUSG00000060063|ENSMUSG00000027483|ENSMUSG00000041479|ENSMUSG00000015568|ENSMUSG00000020848|ENSMUSG00000019768	http://amigo.geneontology.org/cgi-bin/amigo/term_details?term=GO:0008289
T cell differentiation	Gene Ontology	GO:0030217	8	212	0.0076787	0.0446382	ENSMUSG00000030144|ENSMUSG00000030142|ENSMUSG00000027843|ENSMUSG00000076431|ENSMUSG00000003882|ENSMUSG00000025473|ENSMUSG00000027398|ENSMUSG00000024778	http://amigo.geneontology.org/cgi-bin/amigo/term_details?term=GO:0030217
carboxylic acid metabolic process	Gene Ontology	GO:0019752	17	670	0.00775657	0.0449716	ENSMUSG00000020053|ENSMUSG00000027513|ENSMUSG00000003484|ENSMUSG00000028893|ENSMUSG00000028194|ENSMUSG00000026473|ENSMUSG00000047250|ENSMUSG00000005320|ENSMUSG00000000628|ENSMUSG00000072949|ENSMUSG00000060063|ENSMUSG00000027360|ENSMUSG00000020108|ENSMUSG00000015568|ENSMUSG00000020593|ENSMUSG00000061878|ENSMUSG00000019577	http://amigo.geneontology.org/cgi-bin/amigo/term_details?term=GO:0019752
regulation of catabolic process	Gene Ontology	GO:0009894	12	404	0.00775975	0.0449716	ENSMUSG00000020053|ENSMUSG00000027398|ENSMUSG00000020423|ENSMUSG00000020427|ENSMUSG00000045730|ENSMUSG00000044786|ENSMUSG00000031770|ENSMUSG00000045502|ENSMUSG00000025473|ENSMUSG00000055116|ENSMUSG00000020108|ENSMUSG00000025509	http://amigo.geneontology.org/cgi-bin/amigo/term_details?term=GO:0009894
intrinsic apoptotic signaling pathway in response to endoplasmic reticulum stress	Gene Ontology	GO:0070059	4	57	0.00776966	0.0449716	ENSMUSG00000024521|ENSMUSG00000031770|ENSMUSG00000056501|ENSMUSG00000017707	http://amigo.geneontology.org/cgi-bin/amigo/term_details?term=GO:0070059
anatomical structure maturation	Gene Ontology	GO:0071695	4	57	0.00776966	0.0449716	ENSMUSG00000020053|ENSMUSG00000045092|ENSMUSG00000046743|ENSMUSG00000037962	http://amigo.geneontology.org/cgi-bin/amigo/term_details?term=GO:0071695
single-organism carbohydrate metabolic process	Gene Ontology	GO:0044723	14	508	0.00780438	0.0451238	ENSMUSG00000020053|ENSMUSG00000027513|ENSMUSG00000028893|ENSMUSG00000029802|ENSMUSG00000032437|ENSMUSG00000024042|ENSMUSG00000030074|ENSMUSG00000026628|ENSMUSG00000020427|ENSMUSG00000047146|ENSMUSG00000000628|ENSMUSG00000025789|ENSMUSG00000020108|ENSMUSG00000019577	http://amigo.geneontology.org/cgi-bin/amigo/term_details?term=GO:0044723
placenta blood vessel development	Gene Ontology	GO:0060674	3	29	0.0078422	0.045196	ENSMUSG00000053113|ENSMUSG00000010797|ENSMUSG00000052837	http://amigo.geneontology.org/cgi-bin/amigo/term_details?term=GO:0060674
positive regulation of cell cycle arrest	Gene Ontology	GO:0071158	3	29	0.0078422	0.045196	ENSMUSG00000023067|ENSMUSG00000022018|ENSMUSG00000076431	http://amigo.geneontology.org/cgi-bin/amigo/term_details?term=GO:0071158
regulation of the force of heart contraction	Gene Ontology	GO:0002026	3	29	0.0078422	0.045196	ENSMUSG00000053965|ENSMUSG00000030790|ENSMUSG00000045730	http://amigo.geneontology.org/cgi-bin/amigo/term_details?term=GO:0002026
intracellular	Gene Ontology	GO:0005622	167	11177	0.00785236	0.0452059	ENSMUSG00000049892|ENSMUSG00000030350|ENSMUSG00000031770|ENSMUSG00000024190|ENSMUSG00000057719|ENSMUSG00000019577|ENSMUSG00000003484|ENSMUSG00000027843|ENSMUSG00000052837|ENSMUSG00000040907|ENSMUSG00000020387|ENSMUSG00000056602|ENSMUSG00000042510|ENSMUSG00000053113|ENSMUSG00000040055|ENSMUSG00000055116|ENSMUSG00000063632|ENSMUSG00000020593|ENSMUSG00000027068|ENSMUSG00000010797|ENSMUSG00000028337|…	http://amigo.geneontology.org/cgi-bin/amigo/term_details?term=GO:0005622
female gonad development	Gene Ontology	GO:0008585	5	91	0.00790595	0.0454656	ENSMUSG00000048756|ENSMUSG00000021765|ENSMUSG00000056501|ENSMUSG00000019768|ENSMUSG00000007659	http://amigo.geneontology.org/cgi-bin/amigo/term_details?term=GO:0008585
regulation of protein serine/threonine kinase activity	Gene Ontology	GO:0071900	11	355	0.00792914	0.04555	ENSMUSG00000020053|ENSMUSG00000026981|ENSMUSG00000028893|ENSMUSG00000027843|ENSMUSG00000025473|ENSMUSG00000023067|ENSMUSG00000032496|ENSMUSG00000024190|ENSMUSG00000027398|ENSMUSG00000053965|ENSMUSG00000022018	http://amigo.geneontology.org/cgi-bin/amigo/term_details?term=GO:0071900
response to insulin	Gene Ontology	GO:0032868	7	170	0.00798342	0.0458127	ENSMUSG00000027513|ENSMUSG00000028893|ENSMUSG00000019970|ENSMUSG00000053113|ENSMUSG00000027398|ENSMUSG00000020593|ENSMUSG00000019577	http://amigo.geneontology.org/cgi-bin/amigo/term_details?term=GO:0032868
negative regulation of nucleobase-containing compound metabolic process	Gene Ontology	GO:0045934	24	1076	0.00808541	0.0463125	ENSMUSG00000049892|ENSMUSG00000056501|ENSMUSG00000038402|ENSMUSG00000055116|ENSMUSG00000052837|ENSMUSG00000043099|ENSMUSG00000031431|ENSMUSG00000047146|ENSMUSG00000044786|ENSMUSG00000020893|ENSMUSG00000020593|ENSMUSG00000048756|ENSMUSG00000020423|ENSMUSG00000024042|ENSMUSG00000057604|ENSMUSG00000056749|ENSMUSG00000027398|ENSMUSG00000063632|ENSMUSG00000024190|ENSMUSG00000026628|ENSMUSG00000035456|…	http://amigo.geneontology.org/cgi-bin/amigo/term_details?term=GO:0045934
alcohol metabolic process	Gene Ontology	GO:0006066	8	214	0.00808781	0.0463125	ENSMUSG00000027513|ENSMUSG00000027952|ENSMUSG00000024210|ENSMUSG00000027875|ENSMUSG00000028003|ENSMUSG00000005320|ENSMUSG00000027398|ENSMUSG00000061878	http://amigo.geneontology.org/cgi-bin/amigo/term_details?term=GO:0006066
negative regulation of nitrogen compound metabolic process	Gene Ontology	GO:0051172	26	1197	0.00819955	0.0466844	ENSMUSG00000049892|ENSMUSG00000056501|ENSMUSG00000038402|ENSMUSG00000055116|ENSMUSG00000052837|ENSMUSG00000043099|ENSMUSG00000031431|ENSMUSG00000047146|ENSMUSG00000044786|ENSMUSG00000020893|ENSMUSG00000020593|ENSMUSG00000048756|ENSMUSG00000020423|ENSMUSG00000024042|ENSMUSG00000057604|ENSMUSG00000056749|ENSMUSG00000037922|ENSMUSG00000027398|ENSMUSG00000028893|ENSMUSG00000063632|ENSMUSG00000024190|…	http://amigo.geneontology.org/cgi-bin/amigo/term_details?term=GO:0051172
regulation of tyrosine phosphorylation of STAT protein	Gene Ontology	GO:0042509	4	58	0.00822349	0.0466844	ENSMUSG00000020053|ENSMUSG00000027947|ENSMUSG00000053113|ENSMUSG00000058755	http://amigo.geneontology.org/cgi-bin/amigo/term_details?term=GO:0042509
ovarian follicle development	Gene Ontology	GO:0001541	4	58	0.00822349	0.0466844	ENSMUSG00000048756|ENSMUSG00000056501|ENSMUSG00000019768|ENSMUSG00000007659	http://amigo.geneontology.org/cgi-bin/amigo/term_details?term=GO:0001541
amino acid binding	Gene Ontology	GO:0016597	4	58	0.00822349	0.0466844	ENSMUSG00000027360|ENSMUSG00000038332|ENSMUSG00000028893|ENSMUSG00000028194	http://amigo.geneontology.org/cgi-bin/amigo/term_details?term=GO:0016597
nucleotide-binding oligomerization domain containing signaling pathway	Gene Ontology	GO:0070423	2	9	0.00833263	0.0466844	ENSMUSG00000021025|ENSMUSG00000027843	http://amigo.geneontology.org/cgi-bin/amigo/term_details?term=GO:0070423
nucleobase catabolic process	Gene Ontology	GO:0046113	2	9	0.00833263	0.0466844	ENSMUSG00000024066|ENSMUSG00000058624	http://amigo.geneontology.org/cgi-bin/amigo/term_details?term=GO:0046113
positive regulation of toll-like receptor 4 signaling pathway	Gene Ontology	GO:0034145	2	9	0.00833263	0.0466844	ENSMUSG00000032496|ENSMUSG00000027843	http://amigo.geneontology.org/cgi-bin/amigo/term_details?term=GO:0034145
relaxation of cardiac muscle	Gene Ontology	GO:0055119	2	9	0.00833263	0.0466844	ENSMUSG00000053965|ENSMUSG00000026576	http://amigo.geneontology.org/cgi-bin/amigo/term_details?term=GO:0055119
intracellular signal transduction involved in G1 DNA damage checkpoint	Gene Ontology	GO:1902400	2	9	0.00833263	0.0466844	ENSMUSG00000023067|ENSMUSG00000076431	http://amigo.geneontology.org/cgi-bin/amigo/term_details?term=GO:1902400
sodium ion export from cell	Gene Ontology	GO:0036376	2	9	0.00833263	0.0466844	ENSMUSG00000040907|ENSMUSG00000026576	http://amigo.geneontology.org/cgi-bin/amigo/term_details?term=GO:0036376
positive regulation of transcription from RNA polymerase II promoter in response to endoplasmic reticulum stress	Gene Ontology	GO:1990440	2	9	0.00833263	0.0466844	ENSMUSG00000026628|ENSMUSG00000056501	http://amigo.geneontology.org/cgi-bin/amigo/term_details?term=GO:1990440
positive regulation of cell growth involved in cardiac muscle cell development	Gene Ontology	GO:0061051	2	9	0.00833263	0.0466844	ENSMUSG00000020053|ENSMUSG00000005124	http://amigo.geneontology.org/cgi-bin/amigo/term_details?term=GO:0061051
cation-transporting ATPase complex	Gene Ontology	GO:0090533	2	9	0.00833263	0.0466844	ENSMUSG00000040907|ENSMUSG00000026576	http://amigo.geneontology.org/cgi-bin/amigo/term_details?term=GO:0090533
sodium:potassium-exchanging ATPase activity	Gene Ontology	GO:0005391	2	9	0.00833263	0.0466844	ENSMUSG00000040907|ENSMUSG00000026576	http://amigo.geneontology.org/cgi-bin/amigo/term_details?term=GO:0005391
nucleotide-binding oligomerization domain containing 2 signaling pathway	Gene Ontology	GO:0070431	2	9	0.00833263	0.0466844	ENSMUSG00000021025|ENSMUSG00000027843	http://amigo.geneontology.org/cgi-bin/amigo/term_details?term=GO:0070431
negative regulation of TORC1 signaling	Gene Ontology	GO:1904262	2	9	0.00833263	0.0466844	ENSMUSG00000038332|ENSMUSG00000028893	http://amigo.geneontology.org/cgi-bin/amigo/term_details?term=GO:1904262
Fc receptor signaling pathway	Gene Ontology	GO:0038093	2	9	0.00833263	0.0466844	ENSMUSG00000030144|ENSMUSG00000030142	http://amigo.geneontology.org/cgi-bin/amigo/term_details?term=GO:0038093
signal transduction involved in mitotic G1 DNA damage checkpoint	Gene Ontology	GO:0072431	2	9	0.00833263	0.0466844	ENSMUSG00000023067|ENSMUSG00000076431	http://amigo.geneontology.org/cgi-bin/amigo/term_details?term=GO:0072431
negative regulation of interleukin-6 secretion	Gene Ontology	GO:1900165	2	9	0.00833263	0.0466844	ENSMUSG00000037922|ENSMUSG00000027843	http://amigo.geneontology.org/cgi-bin/amigo/term_details?term=GO:1900165
negative regulation of glutamate secretion	Gene Ontology	GO:0014050	2	9	0.00833263	0.0466844	ENSMUSG00000027398|ENSMUSG00000026981	http://amigo.geneontology.org/cgi-bin/amigo/term_details?term=GO:0014050
purine-containing compound metabolic process	Gene Ontology	GO:0072521	12	408	0.00833672	0.0466844	ENSMUSG00000020053|ENSMUSG00000024066|ENSMUSG00000026576|ENSMUSG00000021886|ENSMUSG00000064120|ENSMUSG00000030790|ENSMUSG00000058624|ENSMUSG00000000628|ENSMUSG00000005686|ENSMUSG00000020108|ENSMUSG00000045730|ENSMUSG00000053965	http://amigo.geneontology.org/cgi-bin/amigo/term_details?term=GO:0072521
negative regulation of RNA metabolic process	Gene Ontology	GO:0051253	22	961	0.0083446	0.0466844	ENSMUSG00000049892|ENSMUSG00000056501|ENSMUSG00000038402|ENSMUSG00000055116|ENSMUSG00000052837|ENSMUSG00000043099|ENSMUSG00000031431|ENSMUSG00000047146|ENSMUSG00000044786|ENSMUSG00000020893|ENSMUSG00000020593|ENSMUSG00000048756|ENSMUSG00000020423|ENSMUSG00000024042|ENSMUSG00000057604|ENSMUSG00000056749|ENSMUSG00000027398|ENSMUSG00000063632|ENSMUSG00000026628|ENSMUSG00000035456|ENSMUSG00000019768|…	http://amigo.geneontology.org/cgi-bin/amigo/term_details?term=GO:0051253
oxoacid metabolic process	Gene Ontology	GO:0043436	17	676	0.00841444	0.047026	ENSMUSG00000020053|ENSMUSG00000027513|ENSMUSG00000003484|ENSMUSG00000028893|ENSMUSG00000028194|ENSMUSG00000026473|ENSMUSG00000047250|ENSMUSG00000005320|ENSMUSG00000000628|ENSMUSG00000072949|ENSMUSG00000060063|ENSMUSG00000027360|ENSMUSG00000020108|ENSMUSG00000015568|ENSMUSG00000020593|ENSMUSG00000061878|ENSMUSG00000019577	http://amigo.geneontology.org/cgi-bin/amigo/term_details?term=GO:0043436
phosphotransferase activity, phosphate group as acceptor	Gene Ontology	GO:0016776	3	30	0.00854583	0.0476608	ENSMUSG00000027513|ENSMUSG00000027952|ENSMUSG00000024210	http://amigo.geneontology.org/cgi-bin/amigo/term_details?term=GO:0016776
heterocycle metabolic process	Gene Ontology	GO:0046483	73	4298	0.00855933	0.0476864	ENSMUSG00000024066|ENSMUSG00000032661|ENSMUSG00000030093|ENSMUSG00000028211|ENSMUSG00000064120|ENSMUSG00000049892|ENSMUSG00000030790|ENSMUSG00000058624|ENSMUSG00000055116|ENSMUSG00000061718|ENSMUSG00000058755|ENSMUSG00000038402|ENSMUSG00000027398|ENSMUSG00000038342|ENSMUSG00000027513|ENSMUSG00000053965|ENSMUSG00000025330|ENSMUSG00000026077|ENSMUSG00000021886|ENSMUSG00000003484|ENSMUSG00000026576|…	http://amigo.geneontology.org/cgi-bin/amigo/term_details?term=GO:0046483
positive regulation of defense response to virus by host	Gene Ontology	GO:0002230	5	93	0.00860524	0.047793	ENSMUSG00000057604|ENSMUSG00000026576|ENSMUSG00000042265|ENSMUSG00000027843|ENSMUSG00000019577	http://amigo.geneontology.org/cgi-bin/amigo/term_details?term=GO:0002230
metalloendopeptidase activity	Gene Ontology	GO:0004222	5	93	0.00860524	0.047793	ENSMUSG00000033453|ENSMUSG00000025473|ENSMUSG00000000901|ENSMUSG00000017737|ENSMUSG00000005800	http://amigo.geneontology.org/cgi-bin/amigo/term_details?term=GO:0004222
development of primary female sexual characteristics	Gene Ontology	GO:0046545	5	93	0.00860524	0.047793	ENSMUSG00000048756|ENSMUSG00000021765|ENSMUSG00000056501|ENSMUSG00000019768|ENSMUSG00000007659	http://amigo.geneontology.org/cgi-bin/amigo/term_details?term=GO:0046545
negative regulation of nucleocytoplasmic transport	Gene Ontology	GO:0046823	4	59	0.00869435	0.0481381	ENSMUSG00000021025|ENSMUSG00000078817|ENSMUSG00000005824|ENSMUSG00000076431	http://amigo.geneontology.org/cgi-bin/amigo/term_details?term=GO:0046823
cellular response to interleukin-1	Gene Ontology	GO:0071347	4	59	0.00869435	0.0481381	ENSMUSG00000026981|ENSMUSG00000026073|ENSMUSG00000019122|ENSMUSG00000056501	http://amigo.geneontology.org/cgi-bin/amigo/term_details?term=GO:0071347
gluconeogenesis	Gene Ontology	GO:0006094	4	59	0.00869435	0.0481381	ENSMUSG00000027513|ENSMUSG00000026628|ENSMUSG00000028893|ENSMUSG00000024042	http://amigo.geneontology.org/cgi-bin/amigo/term_details?term=GO:0006094
ameboidal-type cell migration	Gene Ontology	GO:0001667	10	311	0.00877428	0.0485305	ENSMUSG00000038264|ENSMUSG00000030093|ENSMUSG00000025473|ENSMUSG00000017737|ENSMUSG00000036144|ENSMUSG00000031217|ENSMUSG00000023034|ENSMUSG00000001227|ENSMUSG00000014813|ENSMUSG00000022018	http://amigo.geneontology.org/cgi-bin/amigo/term_details?term=GO:0001667
response to oxidative stress	Gene Ontology	GO:0006979	10	312	0.00895625	0.0494858	ENSMUSG00000048756|ENSMUSG00000038332|ENSMUSG00000028893|ENSMUSG00000021250|ENSMUSG00000017737|ENSMUSG00000078566|ENSMUSG00000047250|ENSMUSG00000028211|ENSMUSG00000055116|ENSMUSG00000033685	http://amigo.geneontology.org/cgi-bin/amigo/term_details?term=GO:0006979
endothelial cell proliferation	Gene Ontology	GO:0001935	5	94	0.00897044	0.0495131	ENSMUSG00000024066|ENSMUSG00000023034|ENSMUSG00000028128|ENSMUSG00000010797|ENSMUSG00000022018	http://amigo.geneontology.org/cgi-bin/amigo/term_details?term=GO:0001935
nitrogen compound metabolic process	Gene Ontology	GO:0006807	84	5080	0.0090537	0.0499212	ENSMUSG00000024066|ENSMUSG00000032661|ENSMUSG00000025789|ENSMUSG00000030093|ENSMUSG00000028211|ENSMUSG00000064120|ENSMUSG00000049892|ENSMUSG00000030790|ENSMUSG00000058624|ENSMUSG00000055116|ENSMUSG00000028003|ENSMUSG00000061718|ENSMUSG00000058755|ENSMUSG00000038402|ENSMUSG00000027398|ENSMUSG00000038342|ENSMUSG00000027513|ENSMUSG00000053965|ENSMUSG00000025330|ENSMUSG00000033685|ENSMUSG00000005686|…	http://amigo.geneontology.org/cgi-bin/amigo/term_details?term=GO:0006807
regulation of sequence-specific DNA binding transcription factor activity	Gene Ontology	GO:0051090	10	313	0.00914109	0.0502995	ENSMUSG00000010797|ENSMUSG00000025473|ENSMUSG00000024042|ENSMUSG00000032496|ENSMUSG00000019768|ENSMUSG00000078817|ENSMUSG00000021025|ENSMUSG00000027398|ENSMUSG00000022018|ENSMUSG00000061878	http://amigo.geneontology.org/cgi-bin/amigo/term_details?term=GO:0051090
regulation of metal ion transport	Gene Ontology	GO:0010959	10	313	0.00914109	0.0502995	ENSMUSG00000020053|ENSMUSG00000026576|ENSMUSG00000025804|ENSMUSG00000024042|ENSMUSG00000019970|ENSMUSG00000027483|ENSMUSG00000045730|ENSMUSG00000078532|ENSMUSG00000014813|ENSMUSG00000020893	http://amigo.geneontology.org/cgi-bin/amigo/term_details?term=GO:0010959
vitamin metabolic process	Gene Ontology	GO:0006766	4	60	0.00918248	0.0504753	ENSMUSG00000005320|ENSMUSG00000027398|ENSMUSG00000003484|ENSMUSG00000028003	http://amigo.geneontology.org/cgi-bin/amigo/term_details?term=GO:0006766
negative regulation of fibroblast proliferation	Gene Ontology	GO:0048147	3	31	0.00928535	0.0508321	ENSMUSG00000028211|ENSMUSG00000024521|ENSMUSG00000017737	http://amigo.geneontology.org/cgi-bin/amigo/term_details?term=GO:0048147
cardiac atrium morphogenesis	Gene Ontology	GO:0003209	3	31	0.00928535	0.0508321	ENSMUSG00000057123|ENSMUSG00000010797|ENSMUSG00000076431	http://amigo.geneontology.org/cgi-bin/amigo/term_details?term=GO:0003209
positive regulation of cardiac muscle tissue growth	Gene Ontology	GO:0055023	3	31	0.00928535	0.0508321	ENSMUSG00000020053|ENSMUSG00000010797|ENSMUSG00000005124	http://amigo.geneontology.org/cgi-bin/amigo/term_details?term=GO:0055023
negative regulation of intracellular steroid hormone receptor signaling pathway	Gene Ontology	GO:0033144	3	31	0.00928535	0.0508321	ENSMUSG00000020053|ENSMUSG00000055116|ENSMUSG00000020893	http://amigo.geneontology.org/cgi-bin/amigo/term_details?term=GO:0033144
leukocyte apoptotic process	Gene Ontology	GO:0071887	5	95	0.00934619	0.0510087	ENSMUSG00000025473|ENSMUSG00000026180|ENSMUSG00000024778|ENSMUSG00000045502|ENSMUSG00000031431	http://amigo.geneontology.org/cgi-bin/amigo/term_details?term=GO:0071887
regulation of glucose metabolic process	Gene Ontology	GO:0010906	5	95	0.00934619	0.0510087	ENSMUSG00000020053|ENSMUSG00000024042|ENSMUSG00000028893|ENSMUSG00000020427|ENSMUSG00000019577	http://amigo.geneontology.org/cgi-bin/amigo/term_details?term=GO:0010906
sex differentiation	Gene Ontology	GO:0007548	8	220	0.00941361	0.0513243	ENSMUSG00000048756|ENSMUSG00000007659|ENSMUSG00000019768|ENSMUSG00000038402|ENSMUSG00000060445|ENSMUSG00000021765|ENSMUSG00000009628|ENSMUSG00000056501	http://amigo.geneontology.org/cgi-bin/amigo/term_details?term=GO:0007548
posttranscriptional regulation of gene expression	Gene Ontology	GO:0010608	10	315	0.00951955	0.0517964	ENSMUSG00000020053|ENSMUSG00000048756|ENSMUSG00000028893|ENSMUSG00000076431|ENSMUSG00000020423|ENSMUSG00000044786|ENSMUSG00000019768|ENSMUSG00000056071|ENSMUSG00000037922|ENSMUSG00000020893	http://amigo.geneontology.org/cgi-bin/amigo/term_details?term=GO:0010608
regulation of osteoclast differentiation	Gene Ontology	GO:0045670	4	61	0.00968812	0.0525002	ENSMUSG00000025473|ENSMUSG00000021250|ENSMUSG00000056501|ENSMUSG00000025804	http://amigo.geneontology.org/cgi-bin/amigo/term_details?term=GO:0045670
lipid storage	Gene Ontology	GO:0019915	4	61	0.00968812	0.0525002	ENSMUSG00000021025|ENSMUSG00000027398|ENSMUSG00000015568|ENSMUSG00000025509	http://amigo.geneontology.org/cgi-bin/amigo/term_details?term=GO:0019915
response to amino acid	Gene Ontology	GO:0043200	4	61	0.00968812	0.0525002	ENSMUSG00000038332|ENSMUSG00000028893|ENSMUSG00000056501|ENSMUSG00000007659	http://amigo.geneontology.org/cgi-bin/amigo/term_details?term=GO:0043200
regulation of striated muscle contraction	Gene Ontology	GO:0006942	4	61	0.00968812	0.0525002	ENSMUSG00000053965|ENSMUSG00000057123|ENSMUSG00000014813|ENSMUSG00000026576	http://amigo.geneontology.org/cgi-bin/amigo/term_details?term=GO:0006942
embryonic placenta development	Gene Ontology	GO:0001892	5	96	0.00973265	0.052508	ENSMUSG00000052837|ENSMUSG00000053113|ENSMUSG00000010797|ENSMUSG00000030790|ENSMUSG00000056501	http://amigo.geneontology.org/cgi-bin/amigo/term_details?term=GO:0001892
negative regulation of endopeptidase activity	Gene Ontology	GO:0010951	5	96	0.00973265	0.052508	ENSMUSG00000020053|ENSMUSG00000023034|ENSMUSG00000046223|ENSMUSG00000031770|ENSMUSG00000017737	http://amigo.geneontology.org/cgi-bin/amigo/term_details?term=GO:0010951
intrinsic apoptotic signaling pathway in response to DNA damage	Gene Ontology	GO:0008630	5	96	0.00973265	0.052508	ENSMUSG00000020108|ENSMUSG00000043099|ENSMUSG00000024521|ENSMUSG00000023067|ENSMUSG00000007659	http://amigo.geneontology.org/cgi-bin/amigo/term_details?term=GO:0008630
side of membrane	Gene Ontology	GO:0098552	12	417	0.00975765	0.052508	ENSMUSG00000045092|ENSMUSG00000038264|ENSMUSG00000026358|ENSMUSG00000028967|ENSMUSG00000079018|ENSMUSG00000027843|ENSMUSG00000025804|ENSMUSG00000004609|ENSMUSG00000026581|ENSMUSG00000030474|ENSMUSG00000003882|ENSMUSG00000024778	http://amigo.geneontology.org/cgi-bin/amigo/term_details?term=GO:0098552
mesenchymal cell differentiation	Gene Ontology	GO:0048762	7	177	0.00976402	0.052508	ENSMUSG00000038264|ENSMUSG00000010797|ENSMUSG00000046223|ENSMUSG00000001227|ENSMUSG00000031217|ENSMUSG00000063632|ENSMUSG00000022018	http://amigo.geneontology.org/cgi-bin/amigo/term_details?term=GO:0048762
positive regulation of leukocyte differentiation	Gene Ontology	GO:1902107	6	135	0.00976472	0.052508	ENSMUSG00000025804|ENSMUSG00000003882|ENSMUSG00000021250|ENSMUSG00000086564|ENSMUSG00000025473|ENSMUSG00000027398	http://amigo.geneontology.org/cgi-bin/amigo/term_details?term=GO:1902107
protein localization to nucleus	Gene Ontology	GO:0034504	10	317	0.00990987	0.052508	ENSMUSG00000020053|ENSMUSG00000028893|ENSMUSG00000027843|ENSMUSG00000023067|ENSMUSG00000055116|ENSMUSG00000078817|ENSMUSG00000021025|ENSMUSG00000027398|ENSMUSG00000005824|ENSMUSG00000061878	http://amigo.geneontology.org/cgi-bin/amigo/term_details?term=GO:0034504
potassium-transporting ATPase activity	Gene Ontology	GO:0008556	2	10	0.00991512	0.052508	ENSMUSG00000040907|ENSMUSG00000026576	http://amigo.geneontology.org/cgi-bin/amigo/term_details?term=GO:0008556
nucleotide-binding domain, leucine rich repeat containing receptor signaling pathway	Gene Ontology	GO:0035872	2	10	0.00991512	0.052508	ENSMUSG00000021025|ENSMUSG00000027843	http://amigo.geneontology.org/cgi-bin/amigo/term_details?term=GO:0035872
GATOR2 complex	Gene Ontology	GO:0061700	2	10	0.00991512	0.052508	ENSMUSG00000038332|ENSMUSG00000028893	http://amigo.geneontology.org/cgi-bin/amigo/term_details?term=GO:0061700
peptidyl-cysteine S-nitrosylation	Gene Ontology	GO:0018119	2	10	0.00991512	0.052508	ENSMUSG00000056071|ENSMUSG00000056054	http://amigo.geneontology.org/cgi-bin/amigo/term_details?term=GO:0018119
limb bud formation	Gene Ontology	GO:0060174	2	10	0.00991512	0.052508	ENSMUSG00000063632|ENSMUSG00000076431	http://amigo.geneontology.org/cgi-bin/amigo/term_details?term=GO:0060174
negative regulation of protein autophosphorylation	Gene Ontology	GO:0031953	2	10	0.00991512	0.052508	ENSMUSG00000028967|ENSMUSG00000078817	http://amigo.geneontology.org/cgi-bin/amigo/term_details?term=GO:0031953
positive regulation of insulin-like growth factor receptor signaling pathway	Gene Ontology	GO:0043568	2	10	0.00991512	0.052508	ENSMUSG00000020053|ENSMUSG00000020427	http://amigo.geneontology.org/cgi-bin/amigo/term_details?term=GO:0043568
positive regulation of DNA damage response, signal transduction by p53 class mediator	Gene Ontology	GO:0043517	2	10	0.00991512	0.052508	ENSMUSG00000043099|ENSMUSG00000024521	http://amigo.geneontology.org/cgi-bin/amigo/term_details?term=GO:0043517
regulation of cysteine-type endopeptidase activity involved in apoptotic signaling pathway	Gene Ontology	GO:2001267	2	10	0.00991512	0.052508	ENSMUSG00000017737|ENSMUSG00000046223	http://amigo.geneontology.org/cgi-bin/amigo/term_details?term=GO:2001267
regulation of vasculogenesis	Gene Ontology	GO:2001212	2	10	0.00991512	0.052508	ENSMUSG00000024066|ENSMUSG00000030790	http://amigo.geneontology.org/cgi-bin/amigo/term_details?term=GO:2001212
regulation of glucocorticoid receptor signaling pathway	Gene Ontology	GO:2000322	2	10	0.00991512	0.052508	ENSMUSG00000055116|ENSMUSG00000020893	http://amigo.geneontology.org/cgi-bin/amigo/term_details?term=GO:2000322
peroxiredoxin activity	Gene Ontology	GO:0051920	2	10	0.00991512	0.052508	ENSMUSG00000038332|ENSMUSG00000028893	http://amigo.geneontology.org/cgi-bin/amigo/term_details?term=GO:0051920
cardiac ventricle formation	Gene Ontology	GO:0003211	2	10	0.00991512	0.052508	ENSMUSG00000063632|ENSMUSG00000076431	http://amigo.geneontology.org/cgi-bin/amigo/term_details?term=GO:0003211
sodium ion export	Gene Ontology	GO:0071436	2	10	0.00991512	0.052508	ENSMUSG00000040907|ENSMUSG00000026576	http://amigo.geneontology.org/cgi-bin/amigo/term_details?term=GO:0071436
bone mineralization involved in bone maturation	Gene Ontology	GO:0035630	2	10	0.00991512	0.052508	ENSMUSG00000020053|ENSMUSG00000037962	http://amigo.geneontology.org/cgi-bin/amigo/term_details?term=GO:0035630
regulation of oocyte development	Gene Ontology	GO:0060281	2	10	0.00991512	0.052508	ENSMUSG00000020053|ENSMUSG00000053965	http://amigo.geneontology.org/cgi-bin/amigo/term_details?term=GO:0060281
plasma lipoprotein particle organization	Gene Ontology	GO:0071827	3	32	0.0100611	0.0532284	ENSMUSG00000023913|ENSMUSG00000057074|ENSMUSG00000015568	http://amigo.geneontology.org/cgi-bin/amigo/term_details?term=GO:0071827
hexose biosynthetic process	Gene Ontology	GO:0019319	4	62	0.0102115	0.0538645	ENSMUSG00000027513|ENSMUSG00000026628|ENSMUSG00000028893|ENSMUSG00000024042	http://amigo.geneontology.org/cgi-bin/amigo/term_details?term=GO:0019319
regulation of muscle cell apoptotic process	Gene Ontology	GO:0010660	4	62	0.0102115	0.0538645	ENSMUSG00000020053|ENSMUSG00000026180|ENSMUSG00000078566|ENSMUSG00000020427	http://amigo.geneontology.org/cgi-bin/amigo/term_details?term=GO:0010660
tyrosine phosphorylation of STAT protein	Gene Ontology	GO:0007260	4	62	0.0102115	0.0538645	ENSMUSG00000020053|ENSMUSG00000027947|ENSMUSG00000053113|ENSMUSG00000058755	http://amigo.geneontology.org/cgi-bin/amigo/term_details?term=GO:0007260
cytoplasmic part	Gene Ontology	GO:0044444	95	5890	0.0102695	0.0541171	ENSMUSG00000049892|ENSMUSG00000030350|ENSMUSG00000031770|ENSMUSG00000019577|ENSMUSG00000003484|ENSMUSG00000027843|ENSMUSG00000040907|ENSMUSG00000056602|ENSMUSG00000017707|ENSMUSG00000048489|ENSMUSG00000020593|ENSMUSG00000025509|ENSMUSG00000024042|ENSMUSG00000032496|ENSMUSG00000027398|ENSMUSG00000031765|ENSMUSG00000023067|ENSMUSG00000027875|ENSMUSG00000019768|ENSMUSG00000054675|ENSMUSG00000019851|…	http://amigo.geneontology.org/cgi-bin/amigo/term_details?term=GO:0044444
steroid hormone mediated signaling pathway	Gene Ontology	GO:0043401	6	137	0.010421	0.0548616	ENSMUSG00000020053|ENSMUSG00000019970|ENSMUSG00000023034|ENSMUSG00000019768|ENSMUSG00000055116|ENSMUSG00000020893	http://amigo.geneontology.org/cgi-bin/amigo/term_details?term=GO:0043401
cell development	Gene Ontology	GO:0048468	36	1848	0.0105149	0.0553014	ENSMUSG00000048756|ENSMUSG00000030093|ENSMUSG00000030790|ENSMUSG00000029576|ENSMUSG00000055116|ENSMUSG00000053965|ENSMUSG00000020387|ENSMUSG00000056602|ENSMUSG00000014813|ENSMUSG00000049001|ENSMUSG00000022018|ENSMUSG00000020053|ENSMUSG00000038264|ENSMUSG00000010797|ENSMUSG00000037962|ENSMUSG00000076431|ENSMUSG00000020423|ENSMUSG00000031217|ENSMUSG00000046743|ENSMUSG00000045672|ENSMUSG00000027398|…	http://amigo.geneontology.org/cgi-bin/amigo/term_details?term=GO:0048468
positive regulation of cytokine secretion	Gene Ontology	GO:0050715	5	98	0.0105382	0.0553154	ENSMUSG00000015568|ENSMUSG00000027398|ENSMUSG00000027843|ENSMUSG00000022018|ENSMUSG00000030142	http://amigo.geneontology.org/cgi-bin/amigo/term_details?term=GO:0050715
pattern recognition receptor signaling pathway	Gene Ontology	GO:0002221	5	98	0.0105382	0.0553154	ENSMUSG00000021025|ENSMUSG00000033777|ENSMUSG00000032496|ENSMUSG00000019768|ENSMUSG00000027843	http://amigo.geneontology.org/cgi-bin/amigo/term_details?term=GO:0002221
regulation of T cell proliferation	Gene Ontology	GO:0042129	6	138	0.0107607	0.0563173	ENSMUSG00000020053|ENSMUSG00000027843|ENSMUSG00000031217|ENSMUSG00000056501|ENSMUSG00000027398|ENSMUSG00000053965	http://amigo.geneontology.org/cgi-bin/amigo/term_details?term=GO:0042129
learning	Gene Ontology	GO:0007612	6	138	0.0107607	0.0563173	ENSMUSG00000040907|ENSMUSG00000020423|ENSMUSG00000019970|ENSMUSG00000047250|ENSMUSG00000045730|ENSMUSG00000061718	http://amigo.geneontology.org/cgi-bin/amigo/term_details?term=GO:0007612
endothelial cell migration	Gene Ontology	GO:0043542	6	138	0.0107607	0.0563173	ENSMUSG00000030093|ENSMUSG00000025473|ENSMUSG00000036144|ENSMUSG00000023034|ENSMUSG00000014813|ENSMUSG00000022018	http://amigo.geneontology.org/cgi-bin/amigo/term_details?term=GO:0043542
ventricular septum morphogenesis	Gene Ontology	GO:0060412	3	33	0.0108734	0.0565105	ENSMUSG00000057123|ENSMUSG00000063632|ENSMUSG00000076431	http://amigo.geneontology.org/cgi-bin/amigo/term_details?term=GO:0060412
positive regulation of heart growth	Gene Ontology	GO:0060421	3	33	0.0108734	0.0565105	ENSMUSG00000020053|ENSMUSG00000010797|ENSMUSG00000005124	http://amigo.geneontology.org/cgi-bin/amigo/term_details?term=GO:0060421
cellular response to glucocorticoid stimulus	Gene Ontology	GO:0071385	3	33	0.0108734	0.0565105	ENSMUSG00000020108|ENSMUSG00000044786|ENSMUSG00000019970	http://amigo.geneontology.org/cgi-bin/amigo/term_details?term=GO:0071385
carboxy-lyase activity	Gene Ontology	GO:0016831	3	33	0.0108734	0.0565105	ENSMUSG00000027360|ENSMUSG00000027513|ENSMUSG00000026473	http://amigo.geneontology.org/cgi-bin/amigo/term_details?term=GO:0016831
negative regulation of transcription factor import into nucleus	Gene Ontology	GO:0042992	3	33	0.0108734	0.0565105	ENSMUSG00000021025|ENSMUSG00000078817|ENSMUSG00000005824	http://amigo.geneontology.org/cgi-bin/amigo/term_details?term=GO:0042992
regulation of tyrosine phosphorylation of Stat3 protein	Gene Ontology	GO:0042516	3	33	0.0108734	0.0565105	ENSMUSG00000027947|ENSMUSG00000053113|ENSMUSG00000058755	http://amigo.geneontology.org/cgi-bin/amigo/term_details?term=GO:0042516
icosanoid biosynthetic process	Gene Ontology	GO:0046456	3	33	0.0108734	0.0565105	ENSMUSG00000047250|ENSMUSG00000060063|ENSMUSG00000061878	http://amigo.geneontology.org/cgi-bin/amigo/term_details?term=GO:0046456
negative regulation of cytokine production	Gene Ontology	GO:0001818	7	181	0.0109031	0.0565105	ENSMUSG00000027843|ENSMUSG00000028967|ENSMUSG00000037922|ENSMUSG00000005320|ENSMUSG00000078817|ENSMUSG00000026073|ENSMUSG00000022018	http://amigo.geneontology.org/cgi-bin/amigo/term_details?term=GO:0001818
tissue homeostasis	Gene Ontology	GO:0001894	7	181	0.0109031	0.0565105	ENSMUSG00000024066|ENSMUSG00000045092|ENSMUSG00000025473|ENSMUSG00000045730|ENSMUSG00000029304|ENSMUSG00000009628|ENSMUSG00000019577	http://amigo.geneontology.org/cgi-bin/amigo/term_details?term=GO:0001894
regulation of innate immune response	Gene Ontology	GO:0045088	7	181	0.0109031	0.0565105	ENSMUSG00000027843|ENSMUSG00000025804|ENSMUSG00000025473|ENSMUSG00000032496|ENSMUSG00000019768|ENSMUSG00000033777|ENSMUSG00000021025	http://amigo.geneontology.org/cgi-bin/amigo/term_details?term=GO:0045088
positive regulation of blood circulation	Gene Ontology	GO:1903524	5	99	0.0109576	0.0567381	ENSMUSG00000057123|ENSMUSG00000053965|ENSMUSG00000030790|ENSMUSG00000047250|ENSMUSG00000045730	http://amigo.geneontology.org/cgi-bin/amigo/term_details?term=GO:1903524
carbohydrate metabolic process	Gene Ontology	GO:0005975	15	586	0.0111642	0.0577516	ENSMUSG00000020053|ENSMUSG00000027513|ENSMUSG00000028893|ENSMUSG00000029802|ENSMUSG00000032437|ENSMUSG00000024042|ENSMUSG00000030074|ENSMUSG00000026628|ENSMUSG00000020427|ENSMUSG00000047146|ENSMUSG00000000628|ENSMUSG00000021260|ENSMUSG00000025789|ENSMUSG00000020108|ENSMUSG00000019577	http://amigo.geneontology.org/cgi-bin/amigo/term_details?term=GO:0005975
embryo development	Gene Ontology	GO:0009790	22	988	0.0111878	0.0578181	ENSMUSG00000030093|ENSMUSG00000057123|ENSMUSG00000030790|ENSMUSG00000028003|ENSMUSG00000056501|ENSMUSG00000038402|ENSMUSG00000026576|ENSMUSG00000052837|ENSMUSG00000036144|ENSMUSG00000047146|ENSMUSG00000053113|ENSMUSG00000029802|ENSMUSG00000042622|ENSMUSG00000063632|ENSMUSG00000020053|ENSMUSG00000010797|ENSMUSG00000076431|ENSMUSG00000031217|ENSMUSG00000026981|ENSMUSG00000040055|ENSMUSG00000024190|…	http://amigo.geneontology.org/cgi-bin/amigo/term_details?term=GO:0009790
nucleobase-containing compound metabolic process	Gene Ontology	GO:0006139	71	4210	0.0112167	0.0579116	ENSMUSG00000024066|ENSMUSG00000032661|ENSMUSG00000030093|ENSMUSG00000028211|ENSMUSG00000064120|ENSMUSG00000049892|ENSMUSG00000030790|ENSMUSG00000058624|ENSMUSG00000055116|ENSMUSG00000061718|ENSMUSG00000058755|ENSMUSG00000038402|ENSMUSG00000027398|ENSMUSG00000038342|ENSMUSG00000027513|ENSMUSG00000053965|ENSMUSG00000025330|ENSMUSG00000021886|ENSMUSG00000026576|ENSMUSG00000030087|ENSMUSG00000052837|…	http://amigo.geneontology.org/cgi-bin/amigo/term_details?term=GO:0006139
calcium ion binding	Gene Ontology	GO:0005509	14	532	0.0112659	0.0581097	ENSMUSG00000056054|ENSMUSG00000038074|ENSMUSG00000056071|ENSMUSG00000000901|ENSMUSG00000050505|ENSMUSG00000039167|ENSMUSG00000071379|ENSMUSG00000046743|ENSMUSG00000005800|ENSMUSG00000025473|ENSMUSG00000041479|ENSMUSG00000020848|ENSMUSG00000025330|ENSMUSG00000068263	http://amigo.geneontology.org/cgi-bin/amigo/term_details?term=GO:0005509
secretory granule membrane	Gene Ontology	GO:0030667	4	64	0.0113124	0.0581813	ENSMUSG00000028255|ENSMUSG00000025473|ENSMUSG00000041794|ENSMUSG00000003153	http://amigo.geneontology.org/cgi-bin/amigo/term_details?term=GO:0030667
monosaccharide biosynthetic process	Gene Ontology	GO:0046364	4	64	0.0113124	0.0581813	ENSMUSG00000027513|ENSMUSG00000026628|ENSMUSG00000028893|ENSMUSG00000024042	http://amigo.geneontology.org/cgi-bin/amigo/term_details?term=GO:0046364
protein import	Gene Ontology	GO:0017038	9	275	0.0113593	0.0583662	ENSMUSG00000020053|ENSMUSG00000027843|ENSMUSG00000023067|ENSMUSG00000055116|ENSMUSG00000078817|ENSMUSG00000021025|ENSMUSG00000027398|ENSMUSG00000005824|ENSMUSG00000061878	http://amigo.geneontology.org/cgi-bin/amigo/term_details?term=GO:0017038
regulation of autophagy	Gene Ontology	GO:0010506	7	183	0.0115075	0.0588003	ENSMUSG00000028211|ENSMUSG00000028893|ENSMUSG00000027843|ENSMUSG00000078566|ENSMUSG00000045730|ENSMUSG00000000628|ENSMUSG00000033684	http://amigo.geneontology.org/cgi-bin/amigo/term_details?term=GO:0010506
cellular aromatic compound metabolic process	Gene Ontology	GO:0006725	73	4355	0.0115394	0.0588003	ENSMUSG00000024066|ENSMUSG00000032661|ENSMUSG00000030093|ENSMUSG00000028211|ENSMUSG00000064120|ENSMUSG00000049892|ENSMUSG00000030790|ENSMUSG00000058624|ENSMUSG00000055116|ENSMUSG00000061718|ENSMUSG00000058755|ENSMUSG00000038402|ENSMUSG00000027398|ENSMUSG00000038342|ENSMUSG00000027513|ENSMUSG00000053965|ENSMUSG00000025330|ENSMUSG00000026077|ENSMUSG00000021886|ENSMUSG00000026576|ENSMUSG00000030087|…	http://amigo.geneontology.org/cgi-bin/amigo/term_details?term=GO:0006725
positive regulation of cytokine production	Gene Ontology	GO:0001819	10	325	0.0115944	0.0588003	ENSMUSG00000038264|ENSMUSG00000027947|ENSMUSG00000030142|ENSMUSG00000027843|ENSMUSG00000025473|ENSMUSG00000049130|ENSMUSG00000056501|ENSMUSG00000027398|ENSMUSG00000015568|ENSMUSG00000022018	http://amigo.geneontology.org/cgi-bin/amigo/term_details?term=GO:0001819
hydrolase activity, acting on carbon-nitrogen (but not peptide) bonds, in linear amidines	Gene Ontology	GO:0016813	2	11	0.0116195	0.0588003	ENSMUSG00000025330|ENSMUSG00000028194	http://amigo.geneontology.org/cgi-bin/amigo/term_details?term=GO:0016813
glucose binding	Gene Ontology	GO:0005536	2	11	0.0116195	0.0588003	ENSMUSG00000000628|ENSMUSG00000003153	http://amigo.geneontology.org/cgi-bin/amigo/term_details?term=GO:0005536
adhesion of symbiont to host	Gene Ontology	GO:0044406	2	11	0.0116195	0.0588003	ENSMUSG00000032496|ENSMUSG00000027483	http://amigo.geneontology.org/cgi-bin/amigo/term_details?term=GO:0044406
positive regulation of nuclear-transcribed mRNA poly(A) tail shortening	Gene Ontology	GO:0060213	2	11	0.0116195	0.0588003	ENSMUSG00000020423|ENSMUSG00000044786	http://amigo.geneontology.org/cgi-bin/amigo/term_details?term=GO:0060213
[truncated: 4,135 more rows]

## Sheet: 7d Vs 0d
Biological Processes Analysis for indicating the dysregulated GO terms in the comparison between day 7 and day 0 in the VILI group
[truncated: 5,902 more rows]

[truncated: 1 more sheets: 7d Vs Sham]
