# Supplementary material for: Landscape of transcription and long non-coding RNAs reveals new insights into the inflammatory and fibrotic response following ventilator-induced lung injury
Source: Respir Res. 2018 Jun 22;19:122. doi: 10.1186/s12931-018-0822-z (PMC6013938; doi:10.1186/s12931-018-0822-z)
Supplement: Supplementary file 8 — Table S4. The entire list of dysregulated functional pathways of DE mRNAs in the comparisons of each pair. (XLSX 94 kb) [file 12931_2018_822_MOESM8_ESM.xlsx]

## Sheet: 0d Vs Sham
Pathway analysis of differentially expressed transcripts (DETs) in the comparison between sham and VILI group on day 0
Term	Database	ID	Input number	Background number	P-Value	Corrected P-Value	Input	Hyperlink
Osteoclast differentiation	KEGG PATHWAY	mmu04380	13	129	3.86276e-08	1.84654e-06	ENSMUSG00000058818|ENSMUSG00000059498|ENSMUSG00000026480|ENSMUSG00000052837|ENSMUSG00000059089|ENSMUSG00000021250|ENSMUSG00000004508|ENSMUSG00000074417|ENSMUSG00000053113|ENSMUSG00000021025|ENSMUSG00000027398|ENSMUSG00000062593|ENSMUSG00000029135	http://www.genome.jp/kegg-bin/show_pathway?mmu04380/mmu:17970%09red/mmu:12702%09red/mmu:14131%09red/mmu:16477%09red/mmu:14728%09red/mmu:14284%09red/mmu:18035%09red/mmu:14281%09red/mmu:14389%09red/mmu:18733%09red/mmu:246256%09red/mmu:100038909%09red/mmu:16176%09red
p53 signaling pathway	KEGG PATHWAY	mmu04115	9	68	6.21634e-07	2.16119e-05	ENSMUSG00000020053|ENSMUSG00000038332|ENSMUSG00000028893|ENSMUSG00000024521|ENSMUSG00000021453|ENSMUSG00000023067|ENSMUSG00000020427|ENSMUSG00000019851|ENSMUSG00000024778	http://www.genome.jp/kegg-bin/show_pathway?mmu04115/mmu:16009%09red/mmu:230784%09red/mmu:12575%09red/mmu:16000%09red/mmu:58801%09red/mmu:23882%09red/mmu:64058%09red/mmu:14102%09red/mmu:140742%09red
Cytokine-cytokine receptor interaction	KEGG PATHWAY	mmu04060	15	264	3.5517e-06	9.41375e-05	ENSMUSG00000027947|ENSMUSG00000025804|ENSMUSG00000003882|ENSMUSG00000026068|ENSMUSG00000021508|ENSMUSG00000019122|ENSMUSG00000058755|ENSMUSG00000071713|ENSMUSG00000005824|ENSMUSG00000027398|ENSMUSG00000028859|ENSMUSG00000026180|ENSMUSG00000026073|ENSMUSG00000024778|ENSMUSG00000039304	http://www.genome.jp/kegg-bin/show_pathway?mmu04060/mmu:12986%09red/mmu:57266%09red/mmu:12765%09red/mmu:12983%09red/mmu:14102%09red/mmu:50930%09red/mmu:22035%09red/mmu:12768%09red/mmu:18413%09red/mmu:16174%09red/mmu:20308%09red/mmu:16178%09red/mmu:16194%09red/mmu:16197%09red/mmu:16176%09red
FoxO signaling pathway	KEGG PATHWAY	mmu04068	10	134	1.73981e-05	0.000358267	ENSMUSG00000020053|ENSMUSG00000027513|ENSMUSG00000045092|ENSMUSG00000003882|ENSMUSG00000021453|ENSMUSG00000023067|ENSMUSG00000019970|ENSMUSG00000078566|ENSMUSG00000048756|ENSMUSG00000039304	http://www.genome.jp/kegg-bin/show_pathway?mmu04068/mmu:12575%09red/mmu:13609%09red/mmu:20393%09red/mmu:16000%09red/mmu:22035%09red/mmu:18534%09red/mmu:23882%09red/mmu:12176%09red/mmu:16197%09red/mmu:56484%09red
Leishmaniasis	KEGG PATHWAY	mmu05140	7	65	3.81953e-05	0.000693213	ENSMUSG00000059498|ENSMUSG00000026480|ENSMUSG00000030786|ENSMUSG00000059089|ENSMUSG00000021250|ENSMUSG00000021025|ENSMUSG00000027398	http://www.genome.jp/kegg-bin/show_pathway?mmu05140/mmu:14131%09red/mmu:16409%09red/mmu:18035%09red/mmu:14281%09red/mmu:17970%09red/mmu:246256%09red/mmu:16176%09red
PI3K-Akt signaling pathway	KEGG PATHWAY	mmu04151	15	341	6.19427e-05	0.00106637	ENSMUSG00000020053|ENSMUSG00000048756|ENSMUSG00000027947|ENSMUSG00000027513|ENSMUSG00000003882|ENSMUSG00000045613|ENSMUSG00000023067|ENSMUSG00000019970|ENSMUSG00000029304|ENSMUSG00000023034|ENSMUSG00000058755|ENSMUSG00000007659|ENSMUSG00000005320|ENSMUSG00000020108|ENSMUSG00000028859	http://www.genome.jp/kegg-bin/show_pathway?mmu04151/mmu:12986%09red/mmu:15370%09red/mmu:14186%09red/mmu:12048%09red/mmu:12575%09red/mmu:20393%09red/mmu:16000%09red/mmu:74747%09red/mmu:18534%09red/mmu:18413%09red/mmu:243764%09red/mmu:20750%09red/mmu:16194%09red/mmu:16197%09red/mmu:56484%09red
TNF signaling pathway	KEGG PATHWAY	mmu04668	8	110	0.000143088	0.00219512	ENSMUSG00000052837|ENSMUSG00000021250|ENSMUSG00000017737|ENSMUSG00000053113|ENSMUSG00000056501|ENSMUSG00000021025|ENSMUSG00000027398|ENSMUSG00000024778	http://www.genome.jp/kegg-bin/show_pathway?mmu04668/mmu:12608%09red/mmu:12702%09red/mmu:16477%09red/mmu:18035%09red/mmu:14281%09red/mmu:17395%09red/mmu:16176%09red/mmu:14102%09red
Legionellosis	KEGG PATHWAY	mmu05134	6	58	0.000169011	0.00253423	ENSMUSG00000030786|ENSMUSG00000090877|ENSMUSG00000078566|ENSMUSG00000021025|ENSMUSG00000027398|ENSMUSG00000091971	http://www.genome.jp/kegg-bin/show_pathway?mmu05134/mmu:193740%09red/mmu:16409%09red/mmu:18035%09red/mmu:16176%09red/mmu:12176%09red/mmu:15511%09red
Hematopoietic cell lineage	KEGG PATHWAY	mmu04640	7	87	0.000208853	0.00302216	ENSMUSG00000027947|ENSMUSG00000030786|ENSMUSG00000004609|ENSMUSG00000003882|ENSMUSG00000027398|ENSMUSG00000028859|ENSMUSG00000026073	http://www.genome.jp/kegg-bin/show_pathway?mmu04640/mmu:12986%09red/mmu:16409%09red/mmu:12489%09red/mmu:16176%09red/mmu:16178%09red/mmu:16194%09red/mmu:16197%09red
Aldosterone-regulated sodium reabsorption	KEGG PATHWAY	mmu04960	5	40	0.000268014	0.00366994	ENSMUSG00000020053|ENSMUSG00000040907|ENSMUSG00000019970|ENSMUSG00000026576|ENSMUSG00000024589	http://www.genome.jp/kegg-bin/show_pathway?mmu04960/mmu:20393%09red/mmu:16000%09red/mmu:232975%09red/mmu:83814%09red/mmu:11931%09red
Mineral absorption	KEGG PATHWAY	mmu04978	5	45	0.000441159	0.00535594	ENSMUSG00000040907|ENSMUSG00000031762|ENSMUSG00000026576|ENSMUSG00000031765|ENSMUSG00000027015	http://www.genome.jp/kegg-bin/show_pathway?mmu04978/mmu:17750%09red/mmu:73649%09red/mmu:232975%09red/mmu:17748%09red/mmu:11931%09red
Herpes simplex infection	KEGG PATHWAY	mmu05168	10	206	0.000499158	0.00595209	ENSMUSG00000032661|ENSMUSG00000067235|ENSMUSG00000021250|ENSMUSG00000055116|ENSMUSG00000053113|ENSMUSG00000021025|ENSMUSG00000027398|ENSMUSG00000005824|ENSMUSG00000020893|ENSMUSG00000024778	http://www.genome.jp/kegg-bin/show_pathway?mmu05168/mmu:12702%09red/mmu:50930%09red/mmu:18626%09red/mmu:15007%09red/mmu:18035%09red/mmu:14281%09red/mmu:16176%09red/mmu:246727%09red/mmu:11865%09red/mmu:14102%09red
Apoptosis	KEGG PATHWAY	mmu04210	8	138	0.000605732	0.00703489	ENSMUSG00000021250|ENSMUSG00000021453|ENSMUSG00000039304|ENSMUSG00000007659|ENSMUSG00000021025|ENSMUSG00000071713|ENSMUSG00000024521|ENSMUSG00000024778	http://www.genome.jp/kegg-bin/show_pathway?mmu04210/mmu:12048%09red/mmu:12983%09red/mmu:22035%09red/mmu:58801%09red/mmu:18035%09red/mmu:14281%09red/mmu:23882%09red/mmu:14102%09red
Transcriptional misregulation in cancer	KEGG PATHWAY	mmu05202	9	174	0.000614668	0.00709253	ENSMUSG00000020053|ENSMUSG00000030786|ENSMUSG00000017737|ENSMUSG00000023067|ENSMUSG00000020427|ENSMUSG00000066687|ENSMUSG00000056501|ENSMUSG00000007659|ENSMUSG00000026073	http://www.genome.jp/kegg-bin/show_pathway?mmu05202/mmu:12608%09red/mmu:16009%09red/mmu:12048%09red/mmu:16409%09red/mmu:12575%09red/mmu:16000%09red/mmu:17395%09red/mmu:235320%09red/mmu:16178%09red
MAPK signaling pathway	KEGG PATHWAY	mmu04010	11	254	0.000661888	0.00753989	ENSMUSG00000028862|ENSMUSG00000090877|ENSMUSG00000021250|ENSMUSG00000021453|ENSMUSG00000024190|ENSMUSG00000023034|ENSMUSG00000005320|ENSMUSG00000027398|ENSMUSG00000026073|ENSMUSG00000091971|ENSMUSG00000024778	http://www.genome.jp/kegg-bin/show_pathway?mmu04010/mmu:15370%09red/mmu:193740%09red/mmu:14186%09red/mmu:19252%09red/mmu:53608%09red/mmu:14281%09red/mmu:23882%09red/mmu:16176%09red/mmu:16178%09red/mmu:14102%09red/mmu:15511%09red
Staphylococcus aureus infection	KEGG PATHWAY	mmu05150	5	52	0.000810523	0.00876674	ENSMUSG00000030786|ENSMUSG00000059089|ENSMUSG00000048163|ENSMUSG00000059498|ENSMUSG00000049130	http://www.genome.jp/kegg-bin/show_pathway?mmu05150/mmu:20345%09red/mmu:12273%09red/mmu:14131%09red/mmu:16409%09red/mmu:246256%09red
HTLV-I infection	KEGG PATHWAY	mmu05166	11	277	0.00129976	0.012515	ENSMUSG00000028211|ENSMUSG00000030093|ENSMUSG00000067235|ENSMUSG00000010797|ENSMUSG00000021250|ENSMUSG00000023067|ENSMUSG00000026628|ENSMUSG00000044786|ENSMUSG00000007659|ENSMUSG00000021025|ENSMUSG00000026073	http://www.genome.jp/kegg-bin/show_pathway?mmu05166/mmu:22413%09red/mmu:12048%09red/mmu:12575%09red/mmu:15007%09red/mmu:18035%09red/mmu:14281%09red/mmu:22421%09red/mmu:11910%09red/mmu:60599%09red/mmu:22695%09red/mmu:16178%09red
Jak-STAT signaling pathway	KEGG PATHWAY	mmu04630	8	161	0.00155919	0.014393	ENSMUSG00000027947|ENSMUSG00000003882|ENSMUSG00000023067|ENSMUSG00000053113|ENSMUSG00000058755|ENSMUSG00000007659|ENSMUSG00000071713|ENSMUSG00000028859	http://www.genome.jp/kegg-bin/show_pathway?mmu04630/mmu:12986%09red/mmu:12702%09red/mmu:12048%09red/mmu:12983%09red/mmu:12575%09red/mmu:18413%09red/mmu:16194%09red/mmu:16197%09red
Estrogen signaling pathway	KEGG PATHWAY	mmu04915	6	97	0.00212755	0.0181673	ENSMUSG00000090877|ENSMUSG00000021250|ENSMUSG00000017737|ENSMUSG00000024222|ENSMUSG00000019768|ENSMUSG00000091971	http://www.genome.jp/kegg-bin/show_pathway?mmu04915/mmu:193740%09red/mmu:17395%09red/mmu:14281%09red/mmu:13982%09red/mmu:15511%09red/mmu:14229%09red
Influenza A	KEGG PATHWAY	mmu05164	8	170	0.00215887	0.0183179	ENSMUSG00000032661|ENSMUSG00000090877|ENSMUSG00000053113|ENSMUSG00000039304|ENSMUSG00000021025|ENSMUSG00000027398|ENSMUSG00000091971|ENSMUSG00000024778	http://www.genome.jp/kegg-bin/show_pathway?mmu05164/mmu:193740%09red/mmu:12702%09red/mmu:22035%09red/mmu:18035%09red/mmu:16176%09red/mmu:246727%09red/mmu:14102%09red/mmu:15511%09red
Measles	KEGG PATHWAY	mmu05162	7	137	0.00260952	0.0209781	ENSMUSG00000032661|ENSMUSG00000090877|ENSMUSG00000039304|ENSMUSG00000021025|ENSMUSG00000027398|ENSMUSG00000091971|ENSMUSG00000024778	http://www.genome.jp/kegg-bin/show_pathway?mmu05162/mmu:193740%09red/mmu:22035%09red/mmu:18035%09red/mmu:16176%09red/mmu:246727%09red/mmu:14102%09red/mmu:15511%09red
Proximal tubule bicarbonate reclamation	KEGG PATHWAY	mmu04964	3	22	0.00388412	0.0281401	ENSMUSG00000040907|ENSMUSG00000027513|ENSMUSG00000026576	http://www.genome.jp/kegg-bin/show_pathway?mmu04964/mmu:18534%09red/mmu:232975%09red/mmu:11931%09red
Vitamin digestion and absorption	KEGG PATHWAY	mmu04977	3	24	0.00484733	0.0325221	ENSMUSG00000038496|ENSMUSG00000028003|ENSMUSG00000020432	http://www.genome.jp/kegg-bin/show_pathway?mmu04977/mmu:80721%09red/mmu:21452%09red/mmu:79235%09red
mTOR signaling pathway	KEGG PATHWAY	mmu04150	7	155	0.00498718	0.0329197	ENSMUSG00000020053|ENSMUSG00000030093|ENSMUSG00000010797|ENSMUSG00000019970|ENSMUSG00000020108|ENSMUSG00000028893|ENSMUSG00000020593	http://www.genome.jp/kegg-bin/show_pathway?mmu04150/mmu:22413%09red/mmu:230784%09red/mmu:14245%09red/mmu:20393%09red/mmu:16000%09red/mmu:22421%09red/mmu:74747%09red
cAMP signaling pathway	KEGG PATHWAY	mmu04024	8	197	0.00508705	0.0333775	ENSMUSG00000026576|ENSMUSG00000040907|ENSMUSG00000021250|ENSMUSG00000045613|ENSMUSG00000045730|ENSMUSG00000061718|ENSMUSG00000045502|ENSMUSG00000021025	http://www.genome.jp/kegg-bin/show_pathway?mmu04024/mmu:80885%09red/mmu:11555%09red/mmu:243764%09red/mmu:18035%09red/mmu:14281%09red/mmu:232975%09red/mmu:11931%09red/mmu:19049%09red
Proteoglycans in cancer	KEGG PATHWAY	mmu05205	8	206	0.00654449	0.039727	ENSMUSG00000020053|ENSMUSG00000030093|ENSMUSG00000017737|ENSMUSG00000010797|ENSMUSG00000046223|ENSMUSG00000023067|ENSMUSG00000019768|ENSMUSG00000024778	http://www.genome.jp/kegg-bin/show_pathway?mmu05205/mmu:22413%09red/mmu:12575%09red/mmu:16000%09red/mmu:17395%09red/mmu:22421%09red/mmu:13982%09red/mmu:18793%09red/mmu:14102%09red
Complement and coagulation cascades	KEGG PATHWAY	mmu04610	5	89	0.00724716	0.0426388	ENSMUSG00000030786|ENSMUSG00000049130|ENSMUSG00000039109|ENSMUSG00000046223|ENSMUSG00000028128	http://www.genome.jp/kegg-bin/show_pathway?mmu04610/mmu:14066%09red/mmu:74145%09red/mmu:12273%09red/mmu:18793%09red/mmu:16409%09red
Circadian rhythm	KEGG PATHWAY	mmu04710	3	30	0.00854583	0.0476608	ENSMUSG00000055116|ENSMUSG00000026077|ENSMUSG00000020893	http://www.genome.jp/kegg-bin/show_pathway?mmu04710/mmu:11865%09red/mmu:18143%09red/mmu:18626%09red
Endocrine resistance	KEGG PATHWAY	mmu01522	5	95	0.00934619	0.0510087	ENSMUSG00000020053|ENSMUSG00000021250|ENSMUSG00000017737|ENSMUSG00000023067|ENSMUSG00000019768	http://www.genome.jp/kegg-bin/show_pathway?mmu01522/mmu:13982%09red/mmu:16000%09red/mmu:12575%09red/mmu:14281%09red/mmu:17395%09red
Tuberculosis	KEGG PATHWAY	mmu05152	7	176	0.00949339	0.0517066	ENSMUSG00000059498|ENSMUSG00000030142|ENSMUSG00000030786|ENSMUSG00000059089|ENSMUSG00000056501|ENSMUSG00000027398|ENSMUSG00000061878	http://www.genome.jp/kegg-bin/show_pathway?mmu05152/mmu:12608%09red/mmu:56619%09red/mmu:14131%09red/mmu:16409%09red/mmu:246256%09red/mmu:16176%09red/mmu:20698%09red
Longevity regulating pathway - multiple species	KEGG PATHWAY	mmu04213	4	64	0.0113124	0.0581813	ENSMUSG00000020053|ENSMUSG00000090877|ENSMUSG00000048756|ENSMUSG00000091971	http://www.genome.jp/kegg-bin/show_pathway?mmu04213/mmu:193740%09red/mmu:16000%09red/mmu:15511%09red/mmu:56484%09red
HIF-1 signaling pathway	KEGG PATHWAY	mmu04066	5	106	0.014216	0.0677156	ENSMUSG00000020053|ENSMUSG00000000628|ENSMUSG00000027947|ENSMUSG00000023067|ENSMUSG00000026773	http://www.genome.jp/kegg-bin/show_pathway?mmu04066/mmu:170768%09red/mmu:16000%09red/mmu:12575%09red/mmu:15277%09red/mmu:16194%09red
Renin secretion	KEGG PATHWAY	mmu04924	4	70	0.0150632	0.0702512	ENSMUSG00000028255|ENSMUSG00000031980|ENSMUSG00000056025|ENSMUSG00000045730	http://www.genome.jp/kegg-bin/show_pathway?mmu04924/mmu:12722%09red/mmu:11555%09red/mmu:11606%09red/mmu:23844%09red
Pathways in cancer	KEGG PATHWAY	mmu05200	11	393	0.0156517	0.0718748	ENSMUSG00000020053|ENSMUSG00000030093|ENSMUSG00000010797|ENSMUSG00000021250|ENSMUSG00000017737|ENSMUSG00000023067|ENSMUSG00000066687|ENSMUSG00000007659|ENSMUSG00000021025|ENSMUSG00000028859|ENSMUSG00000024778	http://www.genome.jp/kegg-bin/show_pathway?mmu05200/mmu:12986%09red/mmu:22413%09red/mmu:12048%09red/mmu:12575%09red/mmu:235320%09red/mmu:16000%09red/mmu:18035%09red/mmu:14281%09red/mmu:17395%09red/mmu:22421%09red/mmu:14102%09red
Bile secretion	KEGG PATHWAY	mmu04976	4	71	0.0157557	0.0721607	ENSMUSG00000040907|ENSMUSG00000026576|ENSMUSG00000032204|ENSMUSG00000029802	http://www.genome.jp/kegg-bin/show_pathway?mmu04976/mmu:26357%09red/mmu:64008%09red/mmu:232975%09red/mmu:11931%09red
Chronic myeloid leukemia	KEGG PATHWAY	mmu05220	4	73	0.0171999	0.0768682	ENSMUSG00000021025|ENSMUSG00000004508|ENSMUSG00000023067|ENSMUSG00000007659	http://www.genome.jp/kegg-bin/show_pathway?mmu05220/mmu:12048%09red/mmu:18035%09red/mmu:12575%09red/mmu:14389%09red
Prolactin signaling pathway	KEGG PATHWAY	mmu04917	4	74	0.0179519	0.0786535	ENSMUSG00000048756|ENSMUSG00000021250|ENSMUSG00000053113|ENSMUSG00000019768	http://www.genome.jp/kegg-bin/show_pathway?mmu04917/mmu:12702%09red/mmu:13982%09red/mmu:14281%09red/mmu:56484%09red
Platinum drug resistance	KEGG PATHWAY	mmu01524	4	78	0.0211631	0.0886598	ENSMUSG00000024521|ENSMUSG00000023067|ENSMUSG00000024778|ENSMUSG00000007659	http://www.genome.jp/kegg-bin/show_pathway?mmu01524/mmu:12048%09red/mmu:58801%09red/mmu:14102%09red/mmu:12575%09red
Carbohydrate digestion and absorption	KEGG PATHWAY	mmu04973	3	45	0.0235512	0.0941696	ENSMUSG00000040907|ENSMUSG00000000628|ENSMUSG00000026576	http://www.genome.jp/kegg-bin/show_pathway?mmu04973/mmu:232975%09red/mmu:15277%09red/mmu:11931%09red
EGFR tyrosine kinase inhibitor resistance	KEGG PATHWAY	mmu01521	4	81	0.0237881	0.0949042	ENSMUSG00000020053|ENSMUSG00000048756|ENSMUSG00000027947|ENSMUSG00000007659	http://www.genome.jp/kegg-bin/show_pathway?mmu01521/mmu:16000%09red/mmu:12048%09red/mmu:16194%09red/mmu:56484%09red
PPAR signaling pathway	KEGG PATHWAY	mmu03320	4	85	0.0275823	0.104883	ENSMUSG00000027513|ENSMUSG00000015568|ENSMUSG00000027875|ENSMUSG00000002289	http://www.genome.jp/kegg-bin/show_pathway?mmu03320/mmu:57875%09red/mmu:18534%09red/mmu:16956%09red/mmu:15360%09red
Protein digestion and absorption	KEGG PATHWAY	mmu04974	4	90	0.0328052	0.118196	ENSMUSG00000045672|ENSMUSG00000040907|ENSMUSG00000026576|ENSMUSG00000022180	http://www.genome.jp/kegg-bin/show_pathway?mmu04974/mmu:50934%09red/mmu:232975%09red/mmu:373864%09red/mmu:11931%09red
Endocrine and other factor-regulated calcium reabsorption	KEGG PATHWAY	mmu04961	3	54	0.0366569	0.127442	ENSMUSG00000040907|ENSMUSG00000026576|ENSMUSG00000019768	http://www.genome.jp/kegg-bin/show_pathway?mmu04961/mmu:13982%09red/mmu:232975%09red/mmu:11931%09red
Terpenoid backbone biosynthesis	KEGG PATHWAY	mmu00900	2	22	0.0374959	0.128853	ENSMUSG00000027952|ENSMUSG00000027875	http://www.genome.jp/kegg-bin/show_pathway?mmu00900/mmu:68603%09red/mmu:15360%09red
Longevity regulating pathway	KEGG PATHWAY	mmu04211	4	95	0.0385676	0.131356	ENSMUSG00000020053|ENSMUSG00000038332|ENSMUSG00000028893|ENSMUSG00000048756	http://www.genome.jp/kegg-bin/show_pathway?mmu04211/mmu:230784%09red/mmu:16000%09red/mmu:56484%09red/mmu:140742%09red
Graft-versus-host disease	KEGG PATHWAY	mmu05332	3	57	0.0417014	0.137991	ENSMUSG00000027398|ENSMUSG00000067235|ENSMUSG00000024778	http://www.genome.jp/kegg-bin/show_pathway?mmu05332/mmu:15007%09red/mmu:16176%09red/mmu:14102%09red
Regulation of lipolysis in adipocytes	KEGG PATHWAY	mmu04923	3	57	0.0417014	0.137991	ENSMUSG00000045730|ENSMUSG00000047250|ENSMUSG00000025509	http://www.genome.jp/kegg-bin/show_pathway?mmu04923/mmu:66853%09red/mmu:11555%09red/mmu:19224%09red
NF-kappa B signaling pathway	KEGG PATHWAY	mmu04064	4	99	0.0435682	0.141735	ENSMUSG00000021025|ENSMUSG00000027398|ENSMUSG00000005824|ENSMUSG00000007659	http://www.genome.jp/kegg-bin/show_pathway?mmu04064/mmu:12048%09red/mmu:50930%09red/mmu:18035%09red/mmu:16176%09red
Hepatitis B	KEGG PATHWAY	mmu05161	5	145	0.0441827	0.14354	ENSMUSG00000021025|ENSMUSG00000021250|ENSMUSG00000017737|ENSMUSG00000023067|ENSMUSG00000024778	http://www.genome.jp/kegg-bin/show_pathway?mmu05161/mmu:12575%09red/mmu:14102%09red/mmu:18035%09red/mmu:14281%09red/mmu:17395%09red
Chemokine signaling pathway	KEGG PATHWAY	mmu04062	6	194	0.0444459	0.14422	ENSMUSG00000048756|ENSMUSG00000025804|ENSMUSG00000021508|ENSMUSG00000019122|ENSMUSG00000021025|ENSMUSG00000026180	http://www.genome.jp/kegg-bin/show_pathway?mmu04062/mmu:57266%09red/mmu:12765%09red/mmu:18035%09red/mmu:12768%09red/mmu:20308%09red/mmu:56484%09red
Glycerolipid metabolism	KEGG PATHWAY	mmu00561	3	59	0.045248	0.146291	ENSMUSG00000015568|ENSMUSG00000020593|ENSMUSG00000025509	http://www.genome.jp/kegg-bin/show_pathway?mmu00561/mmu:66853%09red/mmu:16956%09red/mmu:14245%09red
Non-alcoholic fatty liver disease (NAFLD)	KEGG PATHWAY	mmu04932	5	147	0.0463088	0.148385	ENSMUSG00000027398|ENSMUSG00000027947|ENSMUSG00000053113|ENSMUSG00000038342|ENSMUSG00000024778	http://www.genome.jp/kegg-bin/show_pathway?mmu04932/mmu:12702%09red/mmu:16176%09red/mmu:16194%09red/mmu:14102%09red/mmu:208104%09red
Toll-like receptor signaling pathway	KEGG PATHWAY	mmu04620	4	102	0.0475465	0.150808	ENSMUSG00000021025|ENSMUSG00000029304|ENSMUSG00000021250|ENSMUSG00000027398	http://www.genome.jp/kegg-bin/show_pathway?mmu04620/mmu:20750%09red/mmu:18035%09red/mmu:14281%09red/mmu:16176%09red
Pancreatic secretion	KEGG PATHWAY	mmu04972	4	102	0.0475465	0.150808	ENSMUSG00000028255|ENSMUSG00000040907|ENSMUSG00000026576|ENSMUSG00000056025	http://www.genome.jp/kegg-bin/show_pathway?mmu04972/mmu:12722%09red/mmu:23844%09red/mmu:232975%09red/mmu:11931%09red
Chagas disease (American trypanosomiasis)	KEGG PATHWAY	mmu05142	4	103	0.0489159	0.154221	ENSMUSG00000021025|ENSMUSG00000027398|ENSMUSG00000021250|ENSMUSG00000024778	http://www.genome.jp/kegg-bin/show_pathway?mmu05142/mmu:16176%09red/mmu:18035%09red/mmu:14281%09red/mmu:14102%09red
Type I diabetes mellitus	KEGG PATHWAY	mmu04940	3	62	0.0508386	0.157974	ENSMUSG00000027398|ENSMUSG00000067235|ENSMUSG00000024778	http://www.genome.jp/kegg-bin/show_pathway?mmu04940/mmu:15007%09red/mmu:16176%09red/mmu:14102%09red
Insulin resistance	KEGG PATHWAY	mmu04931	4	110	0.0591045	0.176686	ENSMUSG00000021025|ENSMUSG00000027513|ENSMUSG00000053113|ENSMUSG00000038342	http://www.genome.jp/kegg-bin/show_pathway?mmu04931/mmu:18534%09red/mmu:12702%09red/mmu:18035%09red/mmu:208104%09red
Toxoplasmosis	KEGG PATHWAY	mmu05145	4	112	0.0622076	0.183605	ENSMUSG00000021025|ENSMUSG00000090877|ENSMUSG00000091971|ENSMUSG00000007659	http://www.genome.jp/kegg-bin/show_pathway?mmu05145/mmu:193740%09red/mmu:12048%09red/mmu:15511%09red/mmu:18035%09red
Apoptosis - multiple species	KEGG PATHWAY	mmu04215	2	32	0.0701584	0.196417	ENSMUSG00000024521|ENSMUSG00000007659	http://www.genome.jp/kegg-bin/show_pathway?mmu04215/mmu:12048%09red/mmu:58801%09red
B cell receptor signaling pathway	KEGG PATHWAY	mmu04662	3	72	0.0717255	0.196417	ENSMUSG00000058818|ENSMUSG00000021025|ENSMUSG00000021250	http://www.genome.jp/kegg-bin/show_pathway?mmu04662/mmu:18733%09red/mmu:18035%09red/mmu:14281%09red
Adipocytokine signaling pathway	KEGG PATHWAY	mmu04920	3	72	0.0717255	0.196417	ENSMUSG00000021025|ENSMUSG00000027513|ENSMUSG00000053113	http://www.genome.jp/kegg-bin/show_pathway?mmu04920/mmu:18534%09red/mmu:12702%09red/mmu:18035%09red
African trypanosomiasis	KEGG PATHWAY	mmu05143	2	33	0.0738007	0.196417	ENSMUSG00000027398|ENSMUSG00000024778	http://www.genome.jp/kegg-bin/show_pathway?mmu05143/mmu:16176%09red/mmu:14102%09red
Butirosin and neomycin biosynthesis	KEGG PATHWAY	mmu00524	1	5	0.0744359	0.196417	ENSMUSG00000000628	http://www.genome.jp/kegg-bin/show_pathway?mmu00524/mmu:15277%09red
Endocytosis	KEGG PATHWAY	mmu04144	7	278	0.0750266	0.197705	ENSMUSG00000067235|ENSMUSG00000090877|ENSMUSG00000045730|ENSMUSG00000024589|ENSMUSG00000005320|ENSMUSG00000026180|ENSMUSG00000091971	http://www.genome.jp/kegg-bin/show_pathway?mmu04144/mmu:193740%09red/mmu:14186%09red/mmu:12765%09red/mmu:15007%09red/mmu:83814%09red/mmu:15511%09red/mmu:11555%09red
Prion diseases	KEGG PATHWAY	mmu05020	2	34	0.0775023	0.202117	ENSMUSG00000027398|ENSMUSG00000091971	http://www.genome.jp/kegg-bin/show_pathway?mmu05020/mmu:193740%09red/mmu:16176%09red
Pertussis	KEGG PATHWAY	mmu05133	3	75	0.0786328	0.20427	ENSMUSG00000030786|ENSMUSG00000027398|ENSMUSG00000021250	http://www.genome.jp/kegg-bin/show_pathway?mmu05133/mmu:16409%09red/mmu:14281%09red/mmu:16176%09red
Phagosome	KEGG PATHWAY	mmu04145	5	173	0.0794037	0.206072	ENSMUSG00000030786|ENSMUSG00000059089|ENSMUSG00000067235|ENSMUSG00000026480|ENSMUSG00000059498	http://www.genome.jp/kegg-bin/show_pathway?mmu04145/mmu:17970%09red/mmu:15007%09red/mmu:14131%09red/mmu:16409%09red/mmu:246256%09red
Sphingolipid signaling pathway	KEGG PATHWAY	mmu04071	4	123	0.0807642	0.208768	ENSMUSG00000045092|ENSMUSG00000004508|ENSMUSG00000040451|ENSMUSG00000061878	http://www.genome.jp/kegg-bin/show_pathway?mmu04071/mmu:208449%09red/mmu:20698%09red/mmu:14389%09red/mmu:13609%09red
Fructose and mannose metabolism	KEGG PATHWAY	mmu00051	2	35	0.0812611	0.208768	ENSMUSG00000000628|ENSMUSG00000026773	http://www.genome.jp/kegg-bin/show_pathway?mmu00051/mmu:170768%09red/mmu:15277%09red
Salivary secretion	KEGG PATHWAY	mmu04970	3	77	0.083393	0.210869	ENSMUSG00000040907|ENSMUSG00000026576|ENSMUSG00000045730	http://www.genome.jp/kegg-bin/show_pathway?mmu04970/mmu:11555%09red/mmu:232975%09red/mmu:11931%09red
Caffeine metabolism	KEGG PATHWAY	mmu00232	1	6	0.0862933	0.210869	ENSMUSG00000024066	http://www.genome.jp/kegg-bin/show_pathway?mmu00232/mmu:22436%09red
AMPK signaling pathway	KEGG PATHWAY	mmu04152	4	127	0.0881196	0.211367	ENSMUSG00000020053|ENSMUSG00000048756|ENSMUSG00000027513|ENSMUSG00000026773	http://www.genome.jp/kegg-bin/show_pathway?mmu04152/mmu:170768%09red/mmu:18534%09red/mmu:16000%09red/mmu:56484%09red
Antigen processing and presentation	KEGG PATHWAY	mmu04612	3	83	0.0983842	0.220397	ENSMUSG00000090877|ENSMUSG00000067235|ENSMUSG00000091971	http://www.genome.jp/kegg-bin/show_pathway?mmu04612/mmu:15007%09red/mmu:15511%09red/mmu:193740%09red
Peroxisome	KEGG PATHWAY	mmu04146	3	83	0.0983842	0.220397	ENSMUSG00000024066|ENSMUSG00000027952|ENSMUSG00000030545	http://www.genome.jp/kegg-bin/show_pathway?mmu04146/mmu:18631%09red/mmu:22436%09red/mmu:68603%09red
Bladder cancer	KEGG PATHWAY	mmu05219	2	41	0.104904	0.231133	ENSMUSG00000017737|ENSMUSG00000023067	http://www.genome.jp/kegg-bin/show_pathway?mmu05219/mmu:17395%09red/mmu:12575%09red
Hepatitis C	KEGG PATHWAY	mmu05160	4	136	0.105795	0.233001	ENSMUSG00000021025|ENSMUSG00000032661|ENSMUSG00000053113|ENSMUSG00000023067	http://www.genome.jp/kegg-bin/show_pathway?mmu05160/mmu:12702%09red/mmu:18035%09red/mmu:12575%09red/mmu:246727%09red
Signaling pathways regulating pluripotency of stem cells	KEGG PATHWAY	mmu04550	4	140	0.114129	0.241711	ENSMUSG00000020053|ENSMUSG00000030093|ENSMUSG00000005320|ENSMUSG00000010797	http://www.genome.jp/kegg-bin/show_pathway?mmu04550/mmu:22413%09red/mmu:14186%09red/mmu:16000%09red/mmu:22421%09red
Prostate cancer	KEGG PATHWAY	mmu05215	3	89	0.114372	0.241844	ENSMUSG00000020053|ENSMUSG00000021025|ENSMUSG00000023067	http://www.genome.jp/kegg-bin/show_pathway?mmu05215/mmu:16000%09red/mmu:18035%09red/mmu:12575%09red
Sulfur relay system	KEGG PATHWAY	mmu04122	1	10	0.132228	0.258943	ENSMUSG00000064120	http://www.genome.jp/kegg-bin/show_pathway?mmu04122/mmu:56738%09red
Circadian entrainment	KEGG PATHWAY	mmu04713	3	96	0.134162	0.262244	ENSMUSG00000020893|ENSMUSG00000021250|ENSMUSG00000049892	http://www.genome.jp/kegg-bin/show_pathway?mmu04713/mmu:19416%09red/mmu:14281%09red/mmu:18626%09red
Sphingolipid metabolism	KEGG PATHWAY	mmu00600	2	48	0.134453	0.262244	ENSMUSG00000040451|ENSMUSG00000061878	http://www.genome.jp/kegg-bin/show_pathway?mmu00600/mmu:208449%09red/mmu:20698%09red
Epstein-Barr virus infection	KEGG PATHWAY	mmu05169	5	210	0.143104	0.267695	ENSMUSG00000021025|ENSMUSG00000090877|ENSMUSG00000067235|ENSMUSG00000023067|ENSMUSG00000091971	http://www.genome.jp/kegg-bin/show_pathway?mmu05169/mmu:15007%09red/mmu:193740%09red/mmu:15511%09red/mmu:12575%09red/mmu:18035%09red
Type II diabetes mellitus	KEGG PATHWAY	mmu04930	2	50	0.143208	0.267695	ENSMUSG00000000628|ENSMUSG00000053113	http://www.genome.jp/kegg-bin/show_pathway?mmu04930/mmu:12702%09red/mmu:15277%09red
Synthesis and degradation of ketone bodies	KEGG PATHWAY	mmu00072	1	11	0.143347	0.267695	ENSMUSG00000027875	http://www.genome.jp/kegg-bin/show_pathway?mmu00072/mmu:15360%09red
Metabolic pathways	KEGG PATHWAY	mmu01100	21	1268	0.154677	0.279211	ENSMUSG00000024066|ENSMUSG00000027513|ENSMUSG00000025509|ENSMUSG00000003484|ENSMUSG00000026473|ENSMUSG00000032437|ENSMUSG00000064120|ENSMUSG00000027875|ENSMUSG00000047250|ENSMUSG00000058624|ENSMUSG00000023913|ENSMUSG00000000628|ENSMUSG00000072949|ENSMUSG00000040451|ENSMUSG00000021903|ENSMUSG00000027952|ENSMUSG00000027360|ENSMUSG00000027068|ENSMUSG00000020593|ENSMUSG00000061878|ENSMUSG00000005686	http://www.genome.jp/kegg-bin/show_pathway?mmu01100/mmu:27226%09red/mmu:14645%09red/mmu:14245%09red/mmu:66853%09red/mmu:11717%09red/mmu:208449%09red/mmu:22436%09red/mmu:15186%09red/mmu:241452%09red/mmu:15277%09red/mmu:15360%09red/mmu:14544%09red/mmu:18534%09red/mmu:72054%09red/mmu:68603%09red/mmu:68292%09red/mmu:19224%09red/mmu:78754%09red/mmu:56738%09red/mmu:20698%09red/mmu:26897%09red
Cell adhesion molecules (CAMs)	KEGG PATHWAY	mmu04514	4	161	0.162205	0.288414	ENSMUSG00000030786|ENSMUSG00000048163|ENSMUSG00000067235|ENSMUSG00000026581	http://www.genome.jp/kegg-bin/show_pathway?mmu04514/mmu:20345%09red/mmu:15007%09red/mmu:20343%09red/mmu:16409%09red
Folate biosynthesis	KEGG PATHWAY	mmu00790	1	13	0.165162	0.288414	ENSMUSG00000064120	http://www.genome.jp/kegg-bin/show_pathway?mmu00790/mmu:56738%09red
Allograft rejection	KEGG PATHWAY	mmu05330	2	55	0.165578	0.288576	ENSMUSG00000067235|ENSMUSG00000024778	http://www.genome.jp/kegg-bin/show_pathway?mmu05330/mmu:15007%09red/mmu:14102%09red
Basal cell carcinoma	KEGG PATHWAY	mmu05217	2	55	0.165578	0.288576	ENSMUSG00000030093|ENSMUSG00000010797	http://www.genome.jp/kegg-bin/show_pathway?mmu05217/mmu:22413%09red/mmu:22421%09red
Protein processing in endoplasmic reticulum	KEGG PATHWAY	mmu04141	4	163	0.167124	0.290985	ENSMUSG00000090877|ENSMUSG00000031770|ENSMUSG00000091971|ENSMUSG00000032437	http://www.genome.jp/kegg-bin/show_pathway?mmu04141/mmu:64209%09red/mmu:193740%09red/mmu:15511%09red/mmu:68292%09red
NOD-like receptor signaling pathway	KEGG PATHWAY	mmu04621	2	57	0.17469	0.297585	ENSMUSG00000021025|ENSMUSG00000027398	http://www.genome.jp/kegg-bin/show_pathway?mmu04621/mmu:18035%09red/mmu:16176%09red
Amoebiasis	KEGG PATHWAY	mmu05146	3	110	0.176835	0.298667	ENSMUSG00000030786|ENSMUSG00000027398|ENSMUSG00000026073	http://www.genome.jp/kegg-bin/show_pathway?mmu05146/mmu:16178%09red/mmu:16176%09red/mmu:16409%09red
Inflammatory bowel disease (IBD)	KEGG PATHWAY	mmu05321	2	58	0.179276	0.302217	ENSMUSG00000026068|ENSMUSG00000027398	http://www.genome.jp/kegg-bin/show_pathway?mmu05321/mmu:16176%09red/mmu:16174%09red
cGMP-PKG signaling pathway	KEGG PATHWAY	mmu04022	4	172	0.189884	0.313102	ENSMUSG00000040907|ENSMUSG00000053965|ENSMUSG00000026576|ENSMUSG00000045730	http://www.genome.jp/kegg-bin/show_pathway?mmu04022/mmu:11555%09red/mmu:232975%09red/mmu:242202%09red/mmu:11931%09red
Natural killer cell mediated cytotoxicity	KEGG PATHWAY	mmu04650	3	115	0.192895	0.317488	ENSMUSG00000059089|ENSMUSG00000039304|ENSMUSG00000024778	http://www.genome.jp/kegg-bin/show_pathway?mmu04650/mmu:22035%09red/mmu:14102%09red/mmu:246256%09red
Cytosolic DNA-sensing pathway	KEGG PATHWAY	mmu04623	2	61	0.193138	0.317488	ENSMUSG00000021025|ENSMUSG00000027398	http://www.genome.jp/kegg-bin/show_pathway?mmu04623/mmu:18035%09red/mmu:16176%09red
Thyroid hormone signaling pathway	KEGG PATHWAY	mmu04919	3	117	0.19942	0.322468	ENSMUSG00000040907|ENSMUSG00000026576|ENSMUSG00000019768	http://www.genome.jp/kegg-bin/show_pathway?mmu04919/mmu:13982%09red/mmu:232975%09red/mmu:11931%09red
Purine metabolism	KEGG PATHWAY	mmu00230	4	176	0.200303	0.323701	ENSMUSG00000024066|ENSMUSG00000053965|ENSMUSG00000005686|ENSMUSG00000058624	http://www.genome.jp/kegg-bin/show_pathway?mmu00230/mmu:14544%09red/mmu:11717%09red/mmu:22436%09red/mmu:242202%09red
Nitrogen metabolism	KEGG PATHWAY	mmu00910	1	17	0.207143	0.328073	ENSMUSG00000026473	http://www.genome.jp/kegg-bin/show_pathway?mmu00910/mmu:14645%09red
Glycolysis / Gluconeogenesis	KEGG PATHWAY	mmu00010	2	65	0.211821	0.334342	ENSMUSG00000027513|ENSMUSG00000000628	http://www.genome.jp/kegg-bin/show_pathway?mmu00010/mmu:18534%09red/mmu:15277%09red
Glioma	KEGG PATHWAY	mmu05214	2	65	0.211821	0.334342	ENSMUSG00000020053|ENSMUSG00000023067	http://www.genome.jp/kegg-bin/show_pathway?mmu05214/mmu:16000%09red/mmu:12575%09red
Leukocyte transendothelial migration	KEGG PATHWAY	mmu04670	3	122	0.215951	0.337527	ENSMUSG00000030786|ENSMUSG00000017737|ENSMUSG00000026480	http://www.genome.jp/kegg-bin/show_pathway?mmu04670/mmu:17970%09red/mmu:17395%09red/mmu:16409%09red
Amphetamine addiction	KEGG PATHWAY	mmu05031	2	66	0.21652	0.337527	ENSMUSG00000021250|ENSMUSG00000061718	http://www.genome.jp/kegg-bin/show_pathway?mmu05031/mmu:14281%09red/mmu:19049%09red
Arginine biosynthesis	KEGG PATHWAY	mmu00220	1	19	0.227338	0.346377	ENSMUSG00000026473	http://www.genome.jp/kegg-bin/show_pathway?mmu00220/mmu:14645%09red
Thyroid hormone synthesis	KEGG PATHWAY	mmu04918	2	70	0.2354	0.354704	ENSMUSG00000040907|ENSMUSG00000026576	http://www.genome.jp/kegg-bin/show_pathway?mmu04918/mmu:232975%09red/mmu:11931%09red
Autoimmune thyroid disease	KEGG PATHWAY	mmu05320	2	70	0.2354	0.354704	ENSMUSG00000067235|ENSMUSG00000024778	http://www.genome.jp/kegg-bin/show_pathway?mmu05320/mmu:15007%09red/mmu:14102%09red
Dopaminergic synapse	KEGG PATHWAY	mmu04728	3	129	0.239546	0.357849	ENSMUSG00000055116|ENSMUSG00000021250|ENSMUSG00000061718	http://www.genome.jp/kegg-bin/show_pathway?mmu04728/mmu:11865%09red/mmu:14281%09red/mmu:19049%09red
Melanoma	KEGG PATHWAY	mmu05218	2	71	0.240135	0.358329	ENSMUSG00000020053|ENSMUSG00000023067	http://www.genome.jp/kegg-bin/show_pathway?mmu05218/mmu:16000%09red/mmu:12575%09red
Gastric acid secretion	KEGG PATHWAY	mmu04971	2	73	0.249619	0.366858	ENSMUSG00000040907|ENSMUSG00000026576	http://www.genome.jp/kegg-bin/show_pathway?mmu04971/mmu:232975%09red/mmu:11931%09red
Cardiac muscle contraction	KEGG PATHWAY	mmu04260	2	74	0.254366	0.371815	ENSMUSG00000040907|ENSMUSG00000026576	http://www.genome.jp/kegg-bin/show_pathway?mmu04260/mmu:232975%09red/mmu:11931%09red
Salmonella infection	KEGG PATHWAY	mmu05132	2	78	0.273363	0.386996	ENSMUSG00000027398|ENSMUSG00000021250	http://www.genome.jp/kegg-bin/show_pathway?mmu05132/mmu:16176%09red/mmu:14281%09red
Insulin signaling pathway	KEGG PATHWAY	mmu04910	3	140	0.277395	0.389299	ENSMUSG00000027513|ENSMUSG00000000628|ENSMUSG00000053113	http://www.genome.jp/kegg-bin/show_pathway?mmu04910/mmu:18534%09red/mmu:12702%09red/mmu:15277%09red
Histidine metabolism	KEGG PATHWAY	mmu00340	1	25	0.284898	0.395782	ENSMUSG00000027360	http://www.genome.jp/kegg-bin/show_pathway?mmu00340/mmu:15186%09red
Rheumatoid arthritis	KEGG PATHWAY	mmu05323	2	81	0.2876	0.398605	ENSMUSG00000027398|ENSMUSG00000021250	http://www.genome.jp/kegg-bin/show_pathway?mmu05323/mmu:16176%09red/mmu:14281%09red
Phospholipase D signaling pathway	KEGG PATHWAY	mmu04072	3	144	0.291313	0.402916	ENSMUSG00000004508|ENSMUSG00000026180|ENSMUSG00000061878	http://www.genome.jp/kegg-bin/show_pathway?mmu04072/mmu:20698%09red/mmu:12765%09red/mmu:14389%09red
Hippo signaling pathway -multiple species	KEGG PATHWAY	mmu04392	1	27	0.303118	0.41253	ENSMUSG00000046743	http://www.genome.jp/kegg-bin/show_pathway?mmu04392/mmu:329628%09red
Fatty acid elongation	KEGG PATHWAY	mmu00062	1	27	0.303118	0.41253	ENSMUSG00000072949	http://www.genome.jp/kegg-bin/show_pathway?mmu00062/mmu:26897%09red
Butanoate metabolism	KEGG PATHWAY	mmu00650	1	27	0.303118	0.41253	ENSMUSG00000027875	http://www.genome.jp/kegg-bin/show_pathway?mmu00650/mmu:15360%09red
Adrenergic signaling in cardiomyocytes	KEGG PATHWAY	mmu04261	3	148	0.305278	0.414837	ENSMUSG00000040907|ENSMUSG00000026576|ENSMUSG00000045730	http://www.genome.jp/kegg-bin/show_pathway?mmu04261/mmu:11555%09red/mmu:232975%09red/mmu:11931%09red
Insulin secretion	KEGG PATHWAY	mmu04911	2	85	0.306531	0.415907	ENSMUSG00000040907|ENSMUSG00000026576	http://www.genome.jp/kegg-bin/show_pathway?mmu04911/mmu:232975%09red/mmu:11931%09red
Small cell lung cancer	KEGG PATHWAY	mmu05222	2	85	0.306531	0.415907	ENSMUSG00000021025|ENSMUSG00000007659	http://www.genome.jp/kegg-bin/show_pathway?mmu05222/mmu:12048%09red/mmu:18035%09red
Fc gamma R-mediated phagocytosis	KEGG PATHWAY	mmu04666	2	86	0.31125	0.419572	ENSMUSG00000004508|ENSMUSG00000061878	http://www.genome.jp/kegg-bin/show_pathway?mmu04666/mmu:20698%09red/mmu:14389%09red
Biosynthesis of unsaturated fatty acids	KEGG PATHWAY	mmu01040	1	28	0.312054	0.419572	ENSMUSG00000072949	http://www.genome.jp/kegg-bin/show_pathway?mmu01040/mmu:26897%09red
Glyoxylate and dicarboxylate metabolism	KEGG PATHWAY	mmu00630	1	29	0.320875	0.427994	ENSMUSG00000026473	http://www.genome.jp/kegg-bin/show_pathway?mmu00630/mmu:14645%09red
Mucin type O-Glycan biosynthesis	KEGG PATHWAY	mmu00512	1	29	0.320875	0.427994	ENSMUSG00000021903	http://www.genome.jp/kegg-bin/show_pathway?mmu00512/mmu:78754%09red
Arachidonic acid metabolism	KEGG PATHWAY	mmu00590	2	89	0.325365	0.432923	ENSMUSG00000003484|ENSMUSG00000047250	http://www.genome.jp/kegg-bin/show_pathway?mmu00590/mmu:72054%09red/mmu:19224%09red
Retinol metabolism	KEGG PATHWAY	mmu00830	2	90	0.330054	0.433221	ENSMUSG00000028003|ENSMUSG00000027068	http://www.genome.jp/kegg-bin/show_pathway?mmu00830/mmu:79235%09red/mmu:241452%09red
Oxytocin signaling pathway	KEGG PATHWAY	mmu04921	3	157	0.33677	0.440113	ENSMUSG00000021250|ENSMUSG00000023067|ENSMUSG00000009292	http://www.genome.jp/kegg-bin/show_pathway?mmu04921/mmu:28240%09red/mmu:12575%09red/mmu:14281%09red
Other types of O-glycan biosynthesis	KEGG PATHWAY	mmu00514	1	31	0.338182	0.440113	ENSMUSG00000030074	http://www.genome.jp/kegg-bin/show_pathway?mmu00514/mmu:232313%09red
Viral carcinogenesis	KEGG PATHWAY	mmu05203	4	226	0.340477	0.442455	ENSMUSG00000021025|ENSMUSG00000024521|ENSMUSG00000067235|ENSMUSG00000023067	http://www.genome.jp/kegg-bin/show_pathway?mmu05203/mmu:15007%09red/mmu:58801%09red/mmu:18035%09red/mmu:12575%09red
Ras signaling pathway	KEGG PATHWAY	mmu04014	4	228	0.346279	0.446707	ENSMUSG00000020053|ENSMUSG00000005320|ENSMUSG00000004508|ENSMUSG00000007659	http://www.genome.jp/kegg-bin/show_pathway?mmu04014/mmu:14186%09red/mmu:16000%09red/mmu:12048%09red/mmu:14389%09red
Galactose metabolism	KEGG PATHWAY	mmu00052	1	32	0.346669	0.446707	ENSMUSG00000000628	http://www.genome.jp/kegg-bin/show_pathway?mmu00052/mmu:15277%09red
Citrate cycle (TCA cycle)	KEGG PATHWAY	mmu00020	1	32	0.346669	0.446707	ENSMUSG00000027513	http://www.genome.jp/kegg-bin/show_pathway?mmu00020/mmu:18534%09red
Alzheimer's disease	KEGG PATHWAY	mmu05010	3	163	0.357736	0.457099	ENSMUSG00000027398|ENSMUSG00000015568|ENSMUSG00000024778	http://www.genome.jp/kegg-bin/show_pathway?mmu05010/mmu:16956%09red/mmu:16176%09red/mmu:14102%09red
Renin-angiotensin system	KEGG PATHWAY	mmu04614	1	34	0.363321	0.460843	ENSMUSG00000031980	http://www.genome.jp/kegg-bin/show_pathway?mmu04614/mmu:11606%09red
Primary immunodeficiency	KEGG PATHWAY	mmu05340	1	35	0.371487	0.468251	ENSMUSG00000003882	http://www.genome.jp/kegg-bin/show_pathway?mmu05340/mmu:16197%09red
Glucagon signaling pathway	KEGG PATHWAY	mmu04922	2	100	0.376361	0.473458	ENSMUSG00000027513|ENSMUSG00000024042	http://www.genome.jp/kegg-bin/show_pathway?mmu04922/mmu:17691%09red/mmu:18534%09red
Melanogenesis	KEGG PATHWAY	mmu04916	2	100	0.376361	0.473458	ENSMUSG00000030093|ENSMUSG00000010797	http://www.genome.jp/kegg-bin/show_pathway?mmu04916/mmu:22413%09red/mmu:22421%09red
AGE-RAGE signaling pathway in diabetic complications	KEGG PATHWAY	mmu04933	2	102	0.385471	0.481199	ENSMUSG00000027398|ENSMUSG00000028128	http://www.genome.jp/kegg-bin/show_pathway?mmu04933/mmu:14066%09red/mmu:16176%09red
Alanine, aspartate and glutamate metabolism	KEGG PATHWAY	mmu00250	1	37	0.387507	0.481708	ENSMUSG00000026473	http://www.genome.jp/kegg-bin/show_pathway?mmu00250/mmu:14645%09red
Axon guidance	KEGG PATHWAY	mmu04360	3	175	0.399339	0.492867	ENSMUSG00000031217|ENSMUSG00000038264|ENSMUSG00000001227	http://www.genome.jp/kegg-bin/show_pathway?mmu04360/mmu:20361%09red/mmu:13641%09red/mmu:20359%09red
Pyruvate metabolism	KEGG PATHWAY	mmu00620	1	39	0.403121	0.495366	ENSMUSG00000027513	http://www.genome.jp/kegg-bin/show_pathway?mmu00620/mmu:18534%09red
T cell receptor signaling pathway	KEGG PATHWAY	mmu04660	2	106	0.403515	0.495395	ENSMUSG00000021025|ENSMUSG00000021250	http://www.genome.jp/kegg-bin/show_pathway?mmu04660/mmu:18035%09red/mmu:14281%09red
Calcium signaling pathway	KEGG PATHWAY	mmu04020	3	180	0.416467	0.507771	ENSMUSG00000045613|ENSMUSG00000061878|ENSMUSG00000045730	http://www.genome.jp/kegg-bin/show_pathway?mmu04020/mmu:11555%09red/mmu:20698%09red/mmu:243764%09red
Cholinergic synapse	KEGG PATHWAY	mmu04725	2	111	0.425708	0.513917	ENSMUSG00000021250|ENSMUSG00000045613	http://www.genome.jp/kegg-bin/show_pathway?mmu04725/mmu:243764%09red/mmu:14281%09red
Ether lipid metabolism	KEGG PATHWAY	mmu00565	1	44	0.440441	0.525896	ENSMUSG00000023913	http://www.genome.jp/kegg-bin/show_pathway?mmu00565/mmu:27226%09red
ABC transporters	KEGG PATHWAY	mmu02010	1	46	0.454709	0.539683	ENSMUSG00000029802	http://www.genome.jp/kegg-bin/show_pathway?mmu02010/mmu:26357%09red
Malaria	KEGG PATHWAY	mmu05144	1	47	0.461706	0.54581	ENSMUSG00000027398	http://www.genome.jp/kegg-bin/show_pathway?mmu05144/mmu:16176%09red
Cocaine addiction	KEGG PATHWAY	mmu05030	1	48	0.468614	0.551098	ENSMUSG00000061718	http://www.genome.jp/kegg-bin/show_pathway?mmu05030/mmu:19049%09red
N-Glycan biosynthesis	KEGG PATHWAY	mmu00510	1	49	0.475434	0.557362	ENSMUSG00000032437	http://www.genome.jp/kegg-bin/show_pathway?mmu00510/mmu:68292%09red
Amino sugar and nucleotide sugar metabolism	KEGG PATHWAY	mmu00520	1	49	0.475434	0.557362	ENSMUSG00000000628	http://www.genome.jp/kegg-bin/show_pathway?mmu00520/mmu:15277%09red
Cell cycle	KEGG PATHWAY	mmu04110	2	123	0.47713	0.558984	ENSMUSG00000021453|ENSMUSG00000023067	http://www.genome.jp/kegg-bin/show_pathway?mmu04110/mmu:23882%09red/mmu:12575%09red
Neurotrophin signaling pathway	KEGG PATHWAY	mmu04722	2	123	0.47713	0.558984	ENSMUSG00000021025|ENSMUSG00000048756	http://www.genome.jp/kegg-bin/show_pathway?mmu04722/mmu:18035%09red/mmu:56484%09red
Inflammatory mediator regulation of TRP channels	KEGG PATHWAY	mmu04750	2	125	0.485427	0.566807	ENSMUSG00000020053|ENSMUSG00000027398	http://www.genome.jp/kegg-bin/show_pathway?mmu04750/mmu:16000%09red/mmu:16176%09red
Endometrial cancer	KEGG PATHWAY	mmu05213	1	52	0.495374	0.574449	ENSMUSG00000048756	http://www.genome.jp/kegg-bin/show_pathway?mmu05213/mmu:56484%09red
Amyotrophic lateral sclerosis (ALS)	KEGG PATHWAY	mmu05014	1	52	0.495374	0.574449	ENSMUSG00000007659	http://www.genome.jp/kegg-bin/show_pathway?mmu05014/mmu:12048%09red
Drug metabolism - other enzymes	KEGG PATHWAY	mmu00983	1	52	0.495374	0.574449	ENSMUSG00000024066	http://www.genome.jp/kegg-bin/show_pathway?mmu00983/mmu:22436%09red
Serotonergic synapse	KEGG PATHWAY	mmu04726	2	131	0.509821	0.586502	ENSMUSG00000024190|ENSMUSG00000047250	http://www.genome.jp/kegg-bin/show_pathway?mmu04726/mmu:19252%09red/mmu:19224%09red
Spliceosome	KEGG PATHWAY	mmu03040	2	131	0.509821	0.586502	ENSMUSG00000090877|ENSMUSG00000091971	http://www.genome.jp/kegg-bin/show_pathway?mmu03040/mmu:193740%09red/mmu:15511%09red
Neuroactive ligand-receptor interaction	KEGG PATHWAY	mmu04080	4	286	0.510663	0.587345	ENSMUSG00000045092|ENSMUSG00000049130|ENSMUSG00000045613|ENSMUSG00000045730	http://www.genome.jp/kegg-bin/show_pathway?mmu04080/mmu:11555%09red/mmu:12273%09red/mmu:243764%09red/mmu:13609%09red
Starch and sucrose metabolism	KEGG PATHWAY	mmu00500	1	55	0.514558	0.589167	ENSMUSG00000000628	http://www.genome.jp/kegg-bin/show_pathway?mmu00500/mmu:15277%09red
Non-small cell lung cancer	KEGG PATHWAY	mmu05223	1	56	0.52079	0.594142	ENSMUSG00000048756	http://www.genome.jp/kegg-bin/show_pathway?mmu05223/mmu:56484%09red
Acute myeloid leukemia	KEGG PATHWAY	mmu05221	1	57	0.526942	0.60001	ENSMUSG00000066687	http://www.genome.jp/kegg-bin/show_pathway?mmu05221/mmu:235320%09red
Valine, leucine and isoleucine degradation	KEGG PATHWAY	mmu00280	1	57	0.526942	0.60001	ENSMUSG00000027875	http://www.genome.jp/kegg-bin/show_pathway?mmu00280/mmu:15360%09red
Ovarian steroidogenesis	KEGG PATHWAY	mmu04913	1	58	0.533015	0.605252	ENSMUSG00000020053	http://www.genome.jp/kegg-bin/show_pathway?mmu04913/mmu:16000%09red
Ubiquitin mediated proteolysis	KEGG PATHWAY	mmu04120	2	137	0.533448	0.605486	ENSMUSG00000024589|ENSMUSG00000053113	http://www.genome.jp/kegg-bin/show_pathway?mmu04120/mmu:12702%09red/mmu:83814%09red
Rap1 signaling pathway	KEGG PATHWAY	mmu04015	3	216	0.533812	0.605643	ENSMUSG00000020053|ENSMUSG00000030786|ENSMUSG00000005320	http://www.genome.jp/kegg-bin/show_pathway?mmu04015/mmu:14186%09red/mmu:16000%09red/mmu:16409%09red
Regulation of actin cytoskeleton	KEGG PATHWAY	mmu04810	3	216	0.533812	0.605643	ENSMUSG00000030786|ENSMUSG00000005320|ENSMUSG00000045613	http://www.genome.jp/kegg-bin/show_pathway?mmu04810/mmu:14186%09red/mmu:243764%09red/mmu:16409%09red
VEGF signaling pathway	KEGG PATHWAY	mmu04370	1	60	0.544929	0.615429	ENSMUSG00000061878	http://www.genome.jp/kegg-bin/show_pathway?mmu04370/mmu:20698%09red
Long-term depression	KEGG PATHWAY	mmu04730	1	60	0.544929	0.615429	ENSMUSG00000020053	http://www.genome.jp/kegg-bin/show_pathway?mmu04730/mmu:16000%09red
Wnt signaling pathway	KEGG PATHWAY	mmu04310	2	143	0.556286	0.622201	ENSMUSG00000030093|ENSMUSG00000010797	http://www.genome.jp/kegg-bin/show_pathway?mmu04310/mmu:22413%09red/mmu:22421%09red
Colorectal cancer	KEGG PATHWAY	mmu05210	1	64	0.567857	0.6309	ENSMUSG00000021250	http://www.genome.jp/kegg-bin/show_pathway?mmu05210/mmu:14281%09red
Pancreatic cancer	KEGG PATHWAY	mmu05212	1	66	0.578885	0.638646	ENSMUSG00000007659	http://www.genome.jp/kegg-bin/show_pathway?mmu05212/mmu:12048%09red
Central carbon metabolism in cancer	KEGG PATHWAY	mmu05230	1	66	0.578885	0.638646	ENSMUSG00000000628	http://www.genome.jp/kegg-bin/show_pathway?mmu05230/mmu:15277%09red
Fc epsilon RI signaling pathway	KEGG PATHWAY	mmu04664	1	67	0.584294	0.642495	ENSMUSG00000004508	http://www.genome.jp/kegg-bin/show_pathway?mmu04664/mmu:14389%09red
RIG-I-like receptor signaling pathway	KEGG PATHWAY	mmu04622	1	68	0.589633	0.646904	ENSMUSG00000021025	http://www.genome.jp/kegg-bin/show_pathway?mmu04622/mmu:18035%09red
Hippo signaling pathway	KEGG PATHWAY	mmu04390	2	154	0.596065	0.652892	ENSMUSG00000030093|ENSMUSG00000010797	http://www.genome.jp/kegg-bin/show_pathway?mmu04390/mmu:22413%09red/mmu:22421%09red
Biosynthesis of amino acids	KEGG PATHWAY	mmu01230	1	78	0.639405	0.685361	ENSMUSG00000026473	http://www.genome.jp/kegg-bin/show_pathway?mmu01230/mmu:14645%09red
RNA degradation	KEGG PATHWAY	mmu03018	1	79	0.644039	0.689223	ENSMUSG00000020423	http://www.genome.jp/kegg-bin/show_pathway?mmu03018/mmu:12227%09red
Viral myocarditis	KEGG PATHWAY	mmu05416	1	79	0.644039	0.689223	ENSMUSG00000067235	http://www.genome.jp/kegg-bin/show_pathway?mmu05416/mmu:15007%09red
ECM-receptor interaction	KEGG PATHWAY	mmu04512	1	83	0.661987	0.706031	ENSMUSG00000029304	http://www.genome.jp/kegg-bin/show_pathway?mmu04512/mmu:20750%09red
TGF-beta signaling pathway	KEGG PATHWAY	mmu04350	1	84	0.666331	0.710098	ENSMUSG00000021765	http://www.genome.jp/kegg-bin/show_pathway?mmu04350/mmu:14313%09red
Hypertrophic cardiomyopathy (HCM)	KEGG PATHWAY	mmu05410	1	84	0.666331	0.710098	ENSMUSG00000020053	http://www.genome.jp/kegg-bin/show_pathway?mmu05410/mmu:16000%09red
Aldosterone synthesis and secretion	KEGG PATHWAY	mmu04925	1	85	0.670619	0.713816	ENSMUSG00000023034	http://www.genome.jp/kegg-bin/show_pathway?mmu04925/mmu:15370%09red
GABAergic synapse	KEGG PATHWAY	mmu04727	1	87	0.679032	0.721603	ENSMUSG00000026473	http://www.genome.jp/kegg-bin/show_pathway?mmu04727/mmu:14645%09red
Dilated cardiomyopathy	KEGG PATHWAY	mmu05414	1	88	0.683158	0.724426	ENSMUSG00000020053	http://www.genome.jp/kegg-bin/show_pathway?mmu05414/mmu:16000%09red
ErbB signaling pathway	KEGG PATHWAY	mmu04012	1	88	0.683158	0.724426	ENSMUSG00000023067	http://www.genome.jp/kegg-bin/show_pathway?mmu04012/mmu:12575%09red
Progesterone-mediated oocyte maturation	KEGG PATHWAY	mmu04914	1	89	0.687231	0.727592	ENSMUSG00000020053	http://www.genome.jp/kegg-bin/show_pathway?mmu04914/mmu:16000%09red
MicroRNAs in cancer	KEGG PATHWAY	mmu05206	3	280	0.705076	0.742814	ENSMUSG00000020108|ENSMUSG00000017737|ENSMUSG00000023067	http://www.genome.jp/kegg-bin/show_pathway?mmu05206/mmu:17395%09red/mmu:12575%09red/mmu:74747%09red
Glycerophospholipid metabolism	KEGG PATHWAY	mmu00564	1	94	0.706826	0.743486	ENSMUSG00000020593	http://www.genome.jp/kegg-bin/show_pathway?mmu00564/mmu:14245%09red
Chemical carcinogenesis	KEGG PATHWAY	mmu05204	1	94	0.706826	0.743486	ENSMUSG00000030711	http://www.genome.jp/kegg-bin/show_pathway?mmu05204/mmu:20887%09red
Phosphatidylinositol signaling system	KEGG PATHWAY	mmu04070	1	98	0.721617	0.755335	ENSMUSG00000024210	http://www.genome.jp/kegg-bin/show_pathway?mmu04070/mmu:271424%09red
Choline metabolism in cancer	KEGG PATHWAY	mmu05231	1	101	0.73222	0.763299	ENSMUSG00000021250	http://www.genome.jp/kegg-bin/show_pathway?mmu05231/mmu:14281%09red
Focal adhesion	KEGG PATHWAY	mmu04510	2	202	0.738359	0.76895	ENSMUSG00000020053|ENSMUSG00000029304	http://www.genome.jp/kegg-bin/show_pathway?mmu04510/mmu:20750%09red/mmu:16000%09red
Oocyte meiosis	KEGG PATHWAY	mmu04114	1	113	0.770755	0.796031	ENSMUSG00000020053	http://www.genome.jp/kegg-bin/show_pathway?mmu04114/mmu:16000%09red
Glutamatergic synapse	KEGG PATHWAY	mmu04724	1	113	0.770755	0.796031	ENSMUSG00000026473	http://www.genome.jp/kegg-bin/show_pathway?mmu04724/mmu:14645%09red
Carbon metabolism	KEGG PATHWAY	mmu01200	1	116	0.779492	0.80304	ENSMUSG00000000628	http://www.genome.jp/kegg-bin/show_pathway?mmu01200/mmu:15277%09red
Platelet activation	KEGG PATHWAY	mmu04611	1	121	0.793322	0.814825	ENSMUSG00000047250	http://www.genome.jp/kegg-bin/show_pathway?mmu04611/mmu:19224%09red
Systemic lupus erythematosus	KEGG PATHWAY	mmu05322	1	141	0.840515	0.856839	ENSMUSG00000059089	http://www.genome.jp/kegg-bin/show_pathway?mmu05322/mmu:246256%09red
Alcoholism	KEGG PATHWAY	mmu05034	1	194	0.919843	0.930444	ENSMUSG00000061718	http://www.genome.jp/kegg-bin/show_pathway?mmu05034/mmu:19049%09red
Olfactory transduction	KEGG PATHWAY	mmu04740	1	1085	0.999999	0.999999	ENSMUSG00000043383	http://www.genome.jp/kegg-bin/show_pathway?mmu04740/mmu:258708%09red

## Sheet: 7d Vs 0d
Pathway analysis of DETs in the comparison between day 7 and day 0 in the VILI group
#Term	Database	ID	Input number	Background number	P-Value	Corrected P-Value	Input	Hyperlink
Staphylococcus aureus infection	KEGG PATHWAY	mmu05150	17	52	1.42281e-14	8.8042e-13	ENSMUSG00000052270|ENSMUSG00000059498|ENSMUSG00000045551|ENSMUSG00000030786|ENSMUSG00000037548|ENSMUSG00000061780|ENSMUSG00000036594|ENSMUSG00000056529|ENSMUSG00000060586|ENSMUSG00000026874|ENSMUSG00000059089|ENSMUSG00000026656|ENSMUSG00000036887|ENSMUSG00000040552|ENSMUSG00000036905|ENSMUSG00000041538|ENSMUSG00000036896	http://www.genome.jp/kegg-bin/show_pathway?mmu05150/mmu:12267%09red/mmu:14969%09red/mmu:12259%09red/mmu:14131%09red/mmu:14130%09red/mmu:16409%09red/mmu:19204%09red/mmu:15002%09red/mmu:15000%09red/mmu:14289%09red/mmu:14960%09red/mmu:14293%09red/mmu:246256%09red/mmu:12260%09red/mmu:15139%09red/mmu:11537%09red/mmu:12262%09red
Cytokine-cytokine receptor interaction	KEGG PATHWAY	mmu04060	30	264	1.48879e-13	7.79513e-12	ENSMUSG00000023905|ENSMUSG00000027399|ENSMUSG00000019122|ENSMUSG00000044337|ENSMUSG00000023078|ENSMUSG00000022015|ENSMUSG00000018920|ENSMUSG00000019966|ENSMUSG00000022074|ENSMUSG00000024401|ENSMUSG00000071714|ENSMUSG00000058427|ENSMUSG00000030748|ENSMUSG00000037035|ENSMUSG00000027398|ENSMUSG00000029371|ENSMUSG00000009185|ENSMUSG00000029373|ENSMUSG00000035042|ENSMUSG00000000982|ENSMUSG00000028602|…	http://www.genome.jp/kegg-bin/show_pathway?mmu04060/mmu:17311%09red/mmu:22035%09red/mmu:21941%09red/mmu:21943%09red/mmu:16190%09red/mmu:21926%09red/mmu:16197%09red/mmu:12775%09red/mmu:55985%09red/mmu:12778%09red/mmu:20310%09red/mmu:66102%09red/mmu:20304%09red/mmu:12984%09red/mmu:16175%09red/mmu:14825%09red/mmu:20296%09red/mmu:20311%09red/mmu:21938%09red/mmu:16323%09red/mmu:21933%09red/mmu:27279%0…
Osteoclast differentiation	KEGG PATHWAY	mmu04380	21	129	1.64482e-12	6.85262e-11	ENSMUSG00000058818|ENSMUSG00000023992|ENSMUSG00000062593|ENSMUSG00000015950|ENSMUSG00000020901|ENSMUSG00000026656|ENSMUSG00000022015|ENSMUSG00000004864|ENSMUSG00000030579|ENSMUSG00000074417|ENSMUSG00000020623|ENSMUSG00000053113|ENSMUSG00000059089|ENSMUSG00000089942|ENSMUSG00000024401|ENSMUSG00000027399|ENSMUSG00000027398|ENSMUSG00000028111|ENSMUSG00000029135|ENSMUSG00000059498|ENSMUSG00000071715	http://www.genome.jp/kegg-bin/show_pathway?mmu04380/mmu:12702%09red/mmu:14284%09red/mmu:14131%09red/mmu:14130%09red/mmu:14728%09red/mmu:13038%09red/mmu:320207%09red/mmu:26415%09red/mmu:246256%09red/mmu:21943%09red/mmu:18733%09red/mmu:18725%09red/mmu:17972%09red/mmu:16176%09red/mmu:17969%09red/mmu:26399%09red/mmu:22177%09red/mmu:21926%09red/mmu:16175%09red/mmu:100038909%09red/mmu:83433%09red
Leishmaniasis	KEGG PATHWAY	mmu05140	16	65	3.38787e-12	1.29713e-10	ENSMUSG00000059498|ENSMUSG00000030786|ENSMUSG00000037548|ENSMUSG00000027995|ENSMUSG00000047945|ENSMUSG00000036594|ENSMUSG00000060586|ENSMUSG00000004864|ENSMUSG00000020826|ENSMUSG00000059089|ENSMUSG00000015950|ENSMUSG00000027398|ENSMUSG00000027399|ENSMUSG00000024401|ENSMUSG00000041538|ENSMUSG00000071715	http://www.genome.jp/kegg-bin/show_pathway?mmu05140/mmu:26415%09red/mmu:14969%09red/mmu:14131%09red/mmu:17969%09red/mmu:16409%09red/mmu:15002%09red/mmu:14960%09red/mmu:15000%09red/mmu:17972%09red/mmu:18126%09red/mmu:16176%09red/mmu:24088%09red/mmu:17357%09red/mmu:21926%09red/mmu:16175%09red/mmu:246256%09red
Influenza A	KEGG PATHWAY	mmu05164	22	170	2.84007e-11	9.40446e-10	ENSMUSG00000030793|ENSMUSG00000060586|ENSMUSG00000031639|ENSMUSG00000037548|ENSMUSG00000042349|ENSMUSG00000053113|ENSMUSG00000022074|ENSMUSG00000024401|ENSMUSG00000020623|ENSMUSG00000027399|ENSMUSG00000027398|ENSMUSG00000091971|ENSMUSG00000035042|ENSMUSG00000035385|ENSMUSG00000036594|ENSMUSG00000032691|ENSMUSG00000004864|ENSMUSG00000020901|ENSMUSG00000020641|ENSMUSG00000039304|ENSMUSG00000090877|…	http://www.genome.jp/kegg-bin/show_pathway?mmu05164/mmu:22035%09red/mmu:21926%09red/mmu:66824%09red/mmu:58185%09red/mmu:26415%09red/mmu:320207%09red/mmu:16176%09red/mmu:193740%09red/mmu:20296%09red/mmu:14960%09red/mmu:20304%09red/mmu:21933%09red/mmu:14969%09red/mmu:12702%09red/mmu:216799%09red/mmu:15002%09red/mmu:15000%09red/mmu:56489%09red/mmu:15511%09red/mmu:16175%09red/mmu:26399%09red/mmu:1429…
Phagosome	KEGG PATHWAY	mmu04145	22	173	3.86212e-11	1.25182e-09	ENSMUSG00000021477|ENSMUSG00000059498|ENSMUSG00000026656|ENSMUSG00000060586|ENSMUSG00000043091|ENSMUSG00000025044|ENSMUSG00000037548|ENSMUSG00000053835|ENSMUSG00000059089|ENSMUSG00000038642|ENSMUSG00000026390|ENSMUSG00000071715|ENSMUSG00000030786|ENSMUSG00000031494|ENSMUSG00000062591|ENSMUSG00000040152|ENSMUSG00000051439|ENSMUSG00000027995|ENSMUSG00000036594|ENSMUSG00000015950|ENSMUSG00000041538|…	http://www.genome.jp/kegg-bin/show_pathway?mmu04145/mmu:17167%09red/mmu:14131%09red/mmu:22153%09red/mmu:16409%09red/mmu:20288%09red/mmu:246256%09red/mmu:21825%09red/mmu:14130%09red/mmu:12475%09red/mmu:13039%09red/mmu:17972%09red/mmu:13040%09red/mmu:22146%09red/mmu:14960%09red/mmu:24088%09red/mmu:14969%09red/mmu:67951%09red/mmu:15002%09red/mmu:15000%09red/mmu:15042%09red/mmu:17969%09red/mmu:170786…
Hematopoietic cell lineage	KEGG PATHWAY	mmu04640	16	87	1.53066e-10	4.50809e-09	ENSMUSG00000026616|ENSMUSG00000053044|ENSMUSG00000030786|ENSMUSG00000003882|ENSMUSG00000032093|ENSMUSG00000030724|ENSMUSG00000060586|ENSMUSG00000032094|ENSMUSG00000051439|ENSMUSG00000030748|ENSMUSG00000019966|ENSMUSG00000024401|ENSMUSG00000027399|ENSMUSG00000027398|ENSMUSG00000024673|ENSMUSG00000026073	http://www.genome.jp/kegg-bin/show_pathway?mmu04640/mmu:12482%09red/mmu:12478%09red/mmu:14969%09red/mmu:16409%09red/mmu:17311%09red/mmu:12902%09red/mmu:12526%09red/mmu:12475%09red/mmu:12500%09red/mmu:12501%09red/mmu:16176%09red/mmu:16175%09red/mmu:16190%09red/mmu:16178%09red/mmu:21926%09red/mmu:16197%09red
Rheumatoid arthritis	KEGG PATHWAY	mmu05323	15	81	5.28555e-10	1.45853e-08	ENSMUSG00000035042|ENSMUSG00000021477|ENSMUSG00000000982|ENSMUSG00000035385|ENSMUSG00000037548|ENSMUSG00000027995|ENSMUSG00000036594|ENSMUSG00000060586|ENSMUSG00000022015|ENSMUSG00000024401|ENSMUSG00000027399|ENSMUSG00000027398|ENSMUSG00000028111|ENSMUSG00000029371|ENSMUSG00000041538	http://www.genome.jp/kegg-bin/show_pathway?mmu05323/mmu:14969%09red/mmu:16175%09red/mmu:13039%09red/mmu:13038%09red/mmu:15002%09red/mmu:15000%09red/mmu:21943%09red/mmu:14960%09red/mmu:20311%09red/mmu:16176%09red/mmu:24088%09red/mmu:20296%09red/mmu:20302%09red/mmu:21926%09red/mmu:20304%09red
Antigen processing and presentation	KEGG PATHWAY	mmu04612	15	83	7.12483e-10	1.93985e-08	ENSMUSG00000021477|ENSMUSG00000090877|ENSMUSG00000053044|ENSMUSG00000030165|ENSMUSG00000037548|ENSMUSG00000053835|ENSMUSG00000036594|ENSMUSG00000091971|ENSMUSG00000052736|ENSMUSG00000021939|ENSMUSG00000038642|ENSMUSG00000024401|ENSMUSG00000060586|ENSMUSG00000041538|ENSMUSG00000021190	http://www.genome.jp/kegg-bin/show_pathway?mmu04612/mmu:13030%09red/mmu:16643%09red/mmu:16642%09red/mmu:193740%09red/mmu:13039%09red/mmu:15002%09red/mmu:15000%09red/mmu:15042%09red/mmu:14960%09red/mmu:13040%09red/mmu:15511%09red/mmu:19141%09red/mmu:14969%09red/mmu:21926%09red/mmu:12526%09red
Tuberculosis	KEGG PATHWAY	mmu05152	20	176	1.78977e-09	4.52688e-08	ENSMUSG00000051439|ENSMUSG00000059498|ENSMUSG00000026656|ENSMUSG00000030142|ENSMUSG00000027398|ENSMUSG00000030786|ENSMUSG00000037548|ENSMUSG00000027995|ENSMUSG00000036594|ENSMUSG00000060586|ENSMUSG00000004864|ENSMUSG00000020826|ENSMUSG00000059089|ENSMUSG00000058715|ENSMUSG00000038642|ENSMUSG00000027399|ENSMUSG00000024401|ENSMUSG00000031494|ENSMUSG00000041538|ENSMUSG00000032688	http://www.genome.jp/kegg-bin/show_pathway?mmu05152/mmu:14127%09red/mmu:26415%09red/mmu:14969%09red/mmu:14131%09red/mmu:14130%09red/mmu:16409%09red/mmu:170786%09red/mmu:240354%09red/mmu:15002%09red/mmu:15000%09red/mmu:12475%09red/mmu:14960%09red/mmu:13040%09red/mmu:16176%09red/mmu:24088%09red/mmu:18126%09red/mmu:56619%09red/mmu:21926%09red/mmu:16175%09red/mmu:246256%09red
Pertussis	KEGG PATHWAY	mmu05133	14	75	1.8247e-09	4.58119e-08	ENSMUSG00000020826|ENSMUSG00000030786|ENSMUSG00000030793|ENSMUSG00000032691|ENSMUSG00000004864|ENSMUSG00000027399|ENSMUSG00000026874|ENSMUSG00000024401|ENSMUSG00000036887|ENSMUSG00000027398|ENSMUSG00000036905|ENSMUSG00000029371|ENSMUSG00000051439|ENSMUSG00000036896	http://www.genome.jp/kegg-bin/show_pathway?mmu05133/mmu:26415%09red/mmu:15139%09red/mmu:16409%09red/mmu:216799%09red/mmu:12475%09red/mmu:20311%09red/mmu:18126%09red/mmu:16176%09red/mmu:16175%09red/mmu:12260%09red/mmu:12259%09red/mmu:21926%09red/mmu:66824%09red/mmu:12262%09red
TNF signaling pathway	KEGG PATHWAY	mmu04668	16	110	3.232e-09	7.76441e-08	ENSMUSG00000035042|ENSMUSG00000020623|ENSMUSG00000053175|ENSMUSG00000020901|ENSMUSG00000000957|ENSMUSG00000029380|ENSMUSG00000026582|ENSMUSG00000058427|ENSMUSG00000004864|ENSMUSG00000035385|ENSMUSG00000053113|ENSMUSG00000029379|ENSMUSG00000027398|ENSMUSG00000024401|ENSMUSG00000019850|ENSMUSG00000028599	http://www.genome.jp/kegg-bin/show_pathway?mmu04668/mmu:20339%09red/mmu:12702%09red/mmu:14825%09red/mmu:26399%09red/mmu:330122%09red/mmu:320207%09red/mmu:12051%09red/mmu:17387%09red/mmu:21938%09red/mmu:20310%09red/mmu:21929%09red/mmu:16176%09red/mmu:20296%09red/mmu:26415%09red/mmu:21926%09red/mmu:20304%09red
Complement and coagulation cascades	KEGG PATHWAY	mmu04610	14	89	1.28404e-08	2.76973e-07	ENSMUSG00000026616|ENSMUSG00000030786|ENSMUSG00000039109|ENSMUSG00000028128|ENSMUSG00000061780|ENSMUSG00000031538|ENSMUSG00000027611|ENSMUSG00000026874|ENSMUSG00000031444|ENSMUSG00000030111|ENSMUSG00000036887|ENSMUSG00000040552|ENSMUSG00000036905|ENSMUSG00000036896	http://www.genome.jp/kegg-bin/show_pathway?mmu04610/mmu:14058%09red/mmu:15139%09red/mmu:16409%09red/mmu:14066%09red/mmu:74145%09red/mmu:12902%09red/mmu:12267%09red/mmu:19124%09red/mmu:18791%09red/mmu:12262%09red/mmu:12260%09red/mmu:12259%09red/mmu:232345%09red/mmu:11537%09red
Toll-like receptor signaling pathway	KEGG PATHWAY	mmu04620	14	102	6.00272e-08	1.12112e-06	ENSMUSG00000035042|ENSMUSG00000000982|ENSMUSG00000018930|ENSMUSG00000020901|ENSMUSG00000027995|ENSMUSG00000042349|ENSMUSG00000029304|ENSMUSG00000051439|ENSMUSG00000020623|ENSMUSG00000024401|ENSMUSG00000031639|ENSMUSG00000027398|ENSMUSG00000028111|ENSMUSG00000004864	http://www.genome.jp/kegg-bin/show_pathway?mmu04620/mmu:26415%09red/mmu:13038%09red/mmu:320207%09red/mmu:56489%09red/mmu:12475%09red/mmu:20303%09red/mmu:20302%09red/mmu:16176%09red/mmu:24088%09red/mmu:26399%09red/mmu:142980%09red/mmu:20750%09red/mmu:21926%09red/mmu:20304%09red
Chagas disease (American trypanosomiasis)	KEGG PATHWAY	mmu05142	14	103	6.69917e-08	1.23985e-06	ENSMUSG00000035042|ENSMUSG00000024401|ENSMUSG00000000982|ENSMUSG00000020901|ENSMUSG00000027995|ENSMUSG00000032094|ENSMUSG00000020826|ENSMUSG00000035385|ENSMUSG00000032093|ENSMUSG00000036887|ENSMUSG00000027398|ENSMUSG00000036905|ENSMUSG00000036896|ENSMUSG00000004864	http://www.genome.jp/kegg-bin/show_pathway?mmu05142/mmu:20302%09red/mmu:26415%09red/mmu:12262%09red/mmu:20296%09red/mmu:320207%09red/mmu:12500%09red/mmu:12501%09red/mmu:18126%09red/mmu:16176%09red/mmu:24088%09red/mmu:12260%09red/mmu:12259%09red/mmu:21926%09red/mmu:20304%09red
Legionellosis	KEGG PATHWAY	mmu05134	11	58	8.77576e-08	1.59526e-06	ENSMUSG00000030786|ENSMUSG00000090877|ENSMUSG00000027995|ENSMUSG00000029380|ENSMUSG00000058427|ENSMUSG00000051439|ENSMUSG00000029379|ENSMUSG00000030793|ENSMUSG00000024401|ENSMUSG00000027398|ENSMUSG00000091971	http://www.genome.jp/kegg-bin/show_pathway?mmu05134/mmu:193740%09red/mmu:14825%09red/mmu:16409%09red/mmu:330122%09red/mmu:12475%09red/mmu:20310%09red/mmu:16176%09red/mmu:24088%09red/mmu:21926%09red/mmu:66824%09red/mmu:15511%09red
Inflammatory bowel disease (IBD)	KEGG PATHWAY	mmu05321	11	58	8.77576e-08	1.59526e-06	ENSMUSG00000028150|ENSMUSG00000037548|ENSMUSG00000027995|ENSMUSG00000036594|ENSMUSG00000060586|ENSMUSG00000030748|ENSMUSG00000041872|ENSMUSG00000024401|ENSMUSG00000027399|ENSMUSG00000027398|ENSMUSG00000041538	http://www.genome.jp/kegg-bin/show_pathway?mmu05321/mmu:16175%09red/mmu:15002%09red/mmu:15000%09red/mmu:257630%09red/mmu:14960%09red/mmu:16176%09red/mmu:24088%09red/mmu:16190%09red/mmu:14969%09red/mmu:21926%09red/mmu:19885%09red
B cell receptor signaling pathway	KEGG PATHWAY	mmu04662	11	72	6.08359e-07	9.50716e-06	ENSMUSG00000058818|ENSMUSG00000025491|ENSMUSG00000026616|ENSMUSG00000020901|ENSMUSG00000026656|ENSMUSG00000030724|ENSMUSG00000003379|ENSMUSG00000036526|ENSMUSG00000040592|ENSMUSG00000071042|ENSMUSG00000032688	http://www.genome.jp/kegg-bin/show_pathway?mmu04662/mmu:12478%09red/mmu:240354%09red/mmu:108723%09red/mmu:14130%09red/mmu:320207%09red/mmu:12902%09red/mmu:15985%09red/mmu:18733%09red/mmu:68713%09red/mmu:12518%09red/mmu:240168%09red
NOD-like receptor signaling pathway	KEGG PATHWAY	mmu04621	10	57	6.42541e-07	9.96508e-06	ENSMUSG00000035042|ENSMUSG00000035385|ENSMUSG00000029380|ENSMUSG00000058427|ENSMUSG00000032691|ENSMUSG00000004864|ENSMUSG00000030793|ENSMUSG00000024401|ENSMUSG00000027398|ENSMUSG00000019850	http://www.genome.jp/kegg-bin/show_pathway?mmu04621/mmu:26415%09red/mmu:14825%09red/mmu:216799%09red/mmu:20310%09red/mmu:21929%09red/mmu:16176%09red/mmu:20296%09red/mmu:21926%09red/mmu:66824%09red/mmu:20304%09red
Graft-versus-host disease	KEGG PATHWAY	mmu05332	10	57	6.42541e-07	9.96508e-06	ENSMUSG00000030165|ENSMUSG00000037548|ENSMUSG00000053835|ENSMUSG00000036594|ENSMUSG00000060586|ENSMUSG00000037202|ENSMUSG00000024401|ENSMUSG00000027399|ENSMUSG00000027398|ENSMUSG00000041538	http://www.genome.jp/kegg-bin/show_pathway?mmu05332/mmu:16643%09red/mmu:15002%09red/mmu:15000%09red/mmu:15042%09red/mmu:14960%09red/mmu:16176%09red/mmu:16175%09red/mmu:14969%09red/mmu:21926%09red/mmu:18646%09red
Chemokine signaling pathway	KEGG PATHWAY	mmu04062	17	194	8.9811e-07	1.36184e-05	ENSMUSG00000035042|ENSMUSG00000000982|ENSMUSG00000020395|ENSMUSG00000018920|ENSMUSG00000020901|ENSMUSG00000029380|ENSMUSG00000023078|ENSMUSG00000058427|ENSMUSG00000035385|ENSMUSG00000029379|ENSMUSG00000019122|ENSMUSG00000015950|ENSMUSG00000037944|ENSMUSG00000018930|ENSMUSG00000029371|ENSMUSG00000009185|ENSMUSG00000029373	http://www.genome.jp/kegg-bin/show_pathway?mmu04062/mmu:12775%09red/mmu:56744%09red/mmu:20307%09red/mmu:17969%09red/mmu:14825%09red/mmu:16428%09red/mmu:20296%09red/mmu:330122%09red/mmu:320207%09red/mmu:20303%09red/mmu:20310%09red/mmu:20311%09red/mmu:20304%09red/mmu:55985%09red/mmu:66102%09red/mmu:20308%09red/mmu:20302%09red
Toxoplasmosis	KEGG PATHWAY	mmu05145	13	112	1.01375e-06	1.51839e-05	ENSMUSG00000020623|ENSMUSG00000032796|ENSMUSG00000020901|ENSMUSG00000037548|ENSMUSG00000027995|ENSMUSG00000036594|ENSMUSG00000091971|ENSMUSG00000004864|ENSMUSG00000090877|ENSMUSG00000020826|ENSMUSG00000024401|ENSMUSG00000060586|ENSMUSG00000041538	http://www.genome.jp/kegg-bin/show_pathway?mmu05145/mmu:193740%09red/mmu:26415%09red/mmu:16772%09red/mmu:26399%09red/mmu:320207%09red/mmu:15002%09red/mmu:15000%09red/mmu:14960%09red/mmu:18126%09red/mmu:15511%09red/mmu:24088%09red/mmu:14969%09red/mmu:21926%09red
Salmonella infection	KEGG PATHWAY	mmu05132	11	78	1.23969e-06	1.82556e-05	ENSMUSG00000000982|ENSMUSG00000051439|ENSMUSG00000029380|ENSMUSG00000058427|ENSMUSG00000004864|ENSMUSG00000020826|ENSMUSG00000029379|ENSMUSG00000030793|ENSMUSG00000027399|ENSMUSG00000027398|ENSMUSG00000018930	http://www.genome.jp/kegg-bin/show_pathway?mmu05132/mmu:26415%09red/mmu:14825%09red/mmu:330122%09red/mmu:20303%09red/mmu:12475%09red/mmu:20310%09red/mmu:20302%09red/mmu:18126%09red/mmu:16176%09red/mmu:16175%09red/mmu:66824%09red
Prion diseases	KEGG PATHWAY	mmu05020	8	34	1.26544e-06	1.85902e-05	ENSMUSG00000035042|ENSMUSG00000027399|ENSMUSG00000026874|ENSMUSG00000036887|ENSMUSG00000027398|ENSMUSG00000036905|ENSMUSG00000091971|ENSMUSG00000036896	http://www.genome.jp/kegg-bin/show_pathway?mmu05020/mmu:193740%09red/mmu:12259%09red/mmu:12262%09red/mmu:20304%09red/mmu:16175%09red/mmu:12260%09red/mmu:15139%09red/mmu:16176%09red
Measles	KEGG PATHWAY	mmu05162	14	137	1.57794e-06	2.28521e-05	ENSMUSG00000039304|ENSMUSG00000020901|ENSMUSG00000026656|ENSMUSG00000027995|ENSMUSG00000022074|ENSMUSG00000042349|ENSMUSG00000032094|ENSMUSG00000090877|ENSMUSG00000032093|ENSMUSG00000027399|ENSMUSG00000027398|ENSMUSG00000031494|ENSMUSG00000091971|ENSMUSG00000019850	http://www.genome.jp/kegg-bin/show_pathway?mmu05162/mmu:193740%09red/mmu:12501%09red/mmu:24088%09red/mmu:320207%09red/mmu:22035%09red/mmu:12500%09red/mmu:15511%09red/mmu:56489%09red/mmu:21929%09red/mmu:16176%09red/mmu:16175%09red/mmu:21933%09red/mmu:170786%09red/mmu:14130%09red
T cell receptor signaling pathway	KEGG PATHWAY	mmu04660	12	106	3.34179e-06	4.50921e-05	ENSMUSG00000042351|ENSMUSG00000032688|ENSMUSG00000053044|ENSMUSG00000020395|ENSMUSG00000020901|ENSMUSG00000032094|ENSMUSG00000027347|ENSMUSG00000036526|ENSMUSG00000032093|ENSMUSG00000024401|ENSMUSG00000074923|ENSMUSG00000004864	http://www.genome.jp/kegg-bin/show_pathway?mmu04660/mmu:16428%09red/mmu:26415%09red/mmu:240354%09red/mmu:108723%09red/mmu:17444%09red/mmu:320207%09red/mmu:12526%09red/mmu:12500%09red/mmu:12501%09red/mmu:19419%09red/mmu:214230%09red/mmu:21926%09red
Amoebiasis	KEGG PATHWAY	mmu05146	12	110	4.74074e-06	6.13991e-05	ENSMUSG00000021403|ENSMUSG00000030786|ENSMUSG00000027995|ENSMUSG00000032796|ENSMUSG00000020901|ENSMUSG00000024401|ENSMUSG00000078816|ENSMUSG00000027398|ENSMUSG00000019987|ENSMUSG00000026073|ENSMUSG00000051439|ENSMUSG00000020826	http://www.genome.jp/kegg-bin/show_pathway?mmu05146/mmu:11846%09red/mmu:18752%09red/mmu:16409%09red/mmu:320207%09red/mmu:12475%09red/mmu:20706%09red/mmu:18126%09red/mmu:16176%09red/mmu:24088%09red/mmu:16772%09red/mmu:16178%09red/mmu:21926%09red
Natural killer cell mediated cytotoxicity	KEGG PATHWAY	mmu04650	12	115	7.19577e-06	9.07022e-05	ENSMUSG00000030165|ENSMUSG00000020901|ENSMUSG00000059089|ENSMUSG00000037202|ENSMUSG00000030579|ENSMUSG00000052736|ENSMUSG00000022074|ENSMUSG00000078816|ENSMUSG00000024401|ENSMUSG00000058715|ENSMUSG00000079852|ENSMUSG00000039304	http://www.genome.jp/kegg-bin/show_pathway?mmu04650/mmu:14127%09red/mmu:16643%09red/mmu:16642%09red/mmu:320207%09red/mmu:22035%09red/mmu:246256%09red/mmu:16635%09red/mmu:18752%09red/mmu:18646%09red/mmu:21933%09red/mmu:22177%09red/mmu:21926%09red
Type I diabetes mellitus	KEGG PATHWAY	mmu04940	9	62	9.36918e-06	0.000113655	ENSMUSG00000037548|ENSMUSG00000053835|ENSMUSG00000036594|ENSMUSG00000060586|ENSMUSG00000037202|ENSMUSG00000024401|ENSMUSG00000027399|ENSMUSG00000027398|ENSMUSG00000041538	http://www.genome.jp/kegg-bin/show_pathway?mmu04940/mmu:15002%09red/mmu:15000%09red/mmu:15042%09red/mmu:14960%09red/mmu:16176%09red/mmu:16175%09red/mmu:14969%09red/mmu:21926%09red/mmu:18646%09red
Malaria	KEGG PATHWAY	mmu05144	8	47	1.04657e-05	0.000124976	ENSMUSG00000040152|ENSMUSG00000035385|ENSMUSG00000027995|ENSMUSG00000051839|ENSMUSG00000026582|ENSMUSG00000024401|ENSMUSG00000027398|ENSMUSG00000079852	http://www.genome.jp/kegg-bin/show_pathway?mmu05144/mmu:20339%09red/mmu:14934%09red/mmu:16635%09red/mmu:16176%09red/mmu:24088%09red/mmu:20296%09red/mmu:21825%09red/mmu:21926%09red
Primary immunodeficiency	KEGG PATHWAY	mmu05340	7	35	1.49803e-05	0.000171532	ENSMUSG00000053044|ENSMUSG00000003882|ENSMUSG00000030724|ENSMUSG00000032094|ENSMUSG00000003379|ENSMUSG00000032093|ENSMUSG00000017697	http://www.genome.jp/kegg-bin/show_pathway?mmu05340/mmu:12478%09red/mmu:12526%09red/mmu:12500%09red/mmu:12501%09red/mmu:11486%09red/mmu:12518%09red/mmu:16197%09red
Asthma	KEGG PATHWAY	mmu05310	6	23	1.6938e-05	0.000191444	ENSMUSG00000037548|ENSMUSG00000036594|ENSMUSG00000060586|ENSMUSG00000024401|ENSMUSG00000058715|ENSMUSG00000041538	http://www.genome.jp/kegg-bin/show_pathway?mmu05310/mmu:14127%09red/mmu:15002%09red/mmu:15000%09red/mmu:14960%09red/mmu:14969%09red/mmu:21926%09red
Herpes simplex infection	KEGG PATHWAY	mmu05168	15	206	3.04895e-05	0.000326536	ENSMUSG00000035042|ENSMUSG00000053835|ENSMUSG00000035385|ENSMUSG00000037548|ENSMUSG00000027995|ENSMUSG00000036594|ENSMUSG00000026874|ENSMUSG00000060586|ENSMUSG00000053113|ENSMUSG00000042349|ENSMUSG00000024401|ENSMUSG00000031639|ENSMUSG00000027398|ENSMUSG00000041538|ENSMUSG00000001128	http://www.genome.jp/kegg-bin/show_pathway?mmu05168/mmu:12702%09red/mmu:14969%09red/mmu:18636%09red/mmu:20296%09red/mmu:15002%09red/mmu:56489%09red/mmu:15000%09red/mmu:15042%09red/mmu:14960%09red/mmu:16176%09red/mmu:24088%09red/mmu:142980%09red/mmu:15139%09red/mmu:21926%09red/mmu:20304%09red
Apoptosis	KEGG PATHWAY	mmu04210	12	138	3.86231e-05	0.000405146	ENSMUSG00000021477|ENSMUSG00000043091|ENSMUSG00000020901|ENSMUSG00000022074|ENSMUSG00000037202|ENSMUSG00000039304|ENSMUSG00000021939|ENSMUSG00000024401|ENSMUSG00000038642|ENSMUSG00000032359|ENSMUSG00000028111|ENSMUSG00000071714	http://www.genome.jp/kegg-bin/show_pathway?mmu04210/mmu:13030%09red/mmu:12984%09red/mmu:22146%09red/mmu:13036%09red/mmu:13039%09red/mmu:13038%09red/mmu:320207%09red/mmu:22035%09red/mmu:13040%09red/mmu:18646%09red/mmu:21933%09red/mmu:21926%09red
AGE-RAGE signaling pathway in diabetic complications	KEGG PATHWAY	mmu04933	10	102	6.73918e-05	0.000656029	ENSMUSG00000024014|ENSMUSG00000020901|ENSMUSG00000028128|ENSMUSG00000026582|ENSMUSG00000004864|ENSMUSG00000027399|ENSMUSG00000035385|ENSMUSG00000024401|ENSMUSG00000028978|ENSMUSG00000027398	http://www.genome.jp/kegg-bin/show_pathway?mmu04933/mmu:20339%09red/mmu:26415%09red/mmu:14066%09red/mmu:320207%09red/mmu:18127%09red/mmu:16175%09red/mmu:20296%09red/mmu:18712%09red/mmu:21926%09red/mmu:16176%09red
Allograft rejection	KEGG PATHWAY	mmu05330	7	55	0.00019552	0.00161423	ENSMUSG00000037548|ENSMUSG00000053835|ENSMUSG00000036594|ENSMUSG00000060586|ENSMUSG00000037202|ENSMUSG00000024401|ENSMUSG00000041538	http://www.genome.jp/kegg-bin/show_pathway?mmu05330/mmu:15002%09red/mmu:15000%09red/mmu:15042%09red/mmu:14960%09red/mmu:18646%09red/mmu:14969%09red/mmu:21926%09red
Systemic lupus erythematosus	KEGG PATHWAY	mmu05322	11	141	0.000196845	0.00161645	ENSMUSG00000037548|ENSMUSG00000036594|ENSMUSG00000060586|ENSMUSG00000036887|ENSMUSG00000026874|ENSMUSG00000059089|ENSMUSG00000060093|ENSMUSG00000024401|ENSMUSG00000036905|ENSMUSG00000041538|ENSMUSG00000036896	http://www.genome.jp/kegg-bin/show_pathway?mmu05322/mmu:14969%09red/mmu:15139%09red/mmu:326619%09red/mmu:15002%09red/mmu:15000%09red/mmu:14960%09red/mmu:246256%09red/mmu:12260%09red/mmu:12259%09red/mmu:21926%09red/mmu:12262%09red
NF-kappa B signaling pathway	KEGG PATHWAY	mmu04064	9	99	0.000261494	0.00206698	ENSMUSG00000032688|ENSMUSG00000051439|ENSMUSG00000058427|ENSMUSG00000022015|ENSMUSG00000036526|ENSMUSG00000024401|ENSMUSG00000027398|ENSMUSG00000018930|ENSMUSG00000019850	http://www.genome.jp/kegg-bin/show_pathway?mmu04064/mmu:108723%09red/mmu:240354%09red/mmu:20303%09red/mmu:21943%09red/mmu:20310%09red/mmu:21929%09red/mmu:16176%09red/mmu:12475%09red/mmu:21926%09red
HIF-1 signaling pathway	KEGG PATHWAY	mmu04066	9	106	0.000417341	0.00305817	ENSMUSG00000020901|ENSMUSG00000005413|ENSMUSG00000028978|ENSMUSG00000035105|ENSMUSG00000057666|ENSMUSG00000000628|ENSMUSG00000078816|ENSMUSG00000020826|ENSMUSG00000028645	http://www.genome.jp/kegg-bin/show_pathway?mmu04066/mmu:112407%09red/mmu:18752%09red/mmu:20525%09red/mmu:15368%09red/mmu:320207%09red/mmu:15277%09red/mmu:18126%09red/mmu:18127%09red/mmu:14433%09red
Arginine and proline metabolism	KEGG PATHWAY	mmu00330	6	49	0.000675096	0.00461567	ENSMUSG00000000308|ENSMUSG00000020826|ENSMUSG00000028978|ENSMUSG00000021622|ENSMUSG00000019987|ENSMUSG00000051048	http://www.genome.jp/kegg-bin/show_pathway?mmu00330/mmu:11846%09red/mmu:12716%09red/mmu:76722%09red/mmu:18126%09red/mmu:18127%09red/mmu:320452%09red
PI3K-Akt signaling pathway	KEGG PATHWAY	mmu04151	17	341	0.000702585	0.00476637	ENSMUSG00000027513|ENSMUSG00000045613|ENSMUSG00000040152|ENSMUSG00000020901|ENSMUSG00000003882|ENSMUSG00000027995|ENSMUSG00000026768|ENSMUSG00000030724|ENSMUSG00000019970|ENSMUSG00000032796|ENSMUSG00000029304|ENSMUSG00000030748|ENSMUSG00000004791|ENSMUSG00000019966|ENSMUSG00000028364|ENSMUSG00000028978|ENSMUSG00000020108	http://www.genome.jp/kegg-bin/show_pathway?mmu04151/mmu:17311%09red/mmu:12478%09red/mmu:320207%09red/mmu:20393%09red/mmu:241226%09red/mmu:243764%09red/mmu:74747%09red/mmu:18654%09red/mmu:18534%09red/mmu:16772%09red/mmu:18127%09red/mmu:24088%09red/mmu:16190%09red/mmu:21923%09red/mmu:20750%09red/mmu:21825%09red/mmu:16197%09red
Type II diabetes mellitus	KEGG PATHWAY	mmu04930	6	50	0.000743879	0.00498033	ENSMUSG00000020901|ENSMUSG00000000628|ENSMUSG00000053113|ENSMUSG00000032294|ENSMUSG00000024401|ENSMUSG00000022878	http://www.genome.jp/kegg-bin/show_pathway?mmu04930/mmu:12702%09red/mmu:18746%09red/mmu:320207%09red/mmu:15277%09red/mmu:11450%09red/mmu:21926%09red
Arginine biosynthesis	KEGG PATHWAY	mmu00220	4	19	0.00092925	0.0059796	ENSMUSG00000028978|ENSMUSG00000020826|ENSMUSG00000019987|ENSMUSG00000076441	http://www.genome.jp/kegg-bin/show_pathway?mmu00220/mmu:11846%09red/mmu:11898%09red/mmu:18126%09red/mmu:18127%09red
Lysosome	KEGG PATHWAY	mmu04142	9	125	0.00125414	0.00776046	ENSMUSG00000021477|ENSMUSG00000022500|ENSMUSG00000018774|ENSMUSG00000026177|ENSMUSG00000021190|ENSMUSG00000021939|ENSMUSG00000038642|ENSMUSG00000032359|ENSMUSG00000028111	http://www.genome.jp/kegg-bin/show_pathway?mmu04142/mmu:13030%09red/mmu:13036%09red/mmu:13039%09red/mmu:13038%09red/mmu:18173%09red/mmu:56722%09red/mmu:13040%09red/mmu:12514%09red/mmu:19141%09red
Intestinal immune network for IgA production	KEGG PATHWAY	mmu04672	5	41	0.00192841	0.0110716	ENSMUSG00000037548|ENSMUSG00000026417|ENSMUSG00000060586|ENSMUSG00000041538|ENSMUSG00000036594	http://www.genome.jp/kegg-bin/show_pathway?mmu04672/mmu:14960%09red/mmu:14969%09red/mmu:15002%09red/mmu:18703%09red/mmu:15000%09red
MAPK signaling pathway	KEGG PATHWAY	mmu04010	13	254	0.00231985	0.0128378	ENSMUSG00000020623|ENSMUSG00000027347|ENSMUSG00000051439|ENSMUSG00000090877|ENSMUSG00000078816|ENSMUSG00000091971|ENSMUSG00000004864|ENSMUSG00000027399|ENSMUSG00000024401|ENSMUSG00000071042|ENSMUSG00000027398|ENSMUSG00000026073|ENSMUSG00000055254	http://www.genome.jp/kegg-bin/show_pathway?mmu04010/mmu:193740%09red/mmu:26415%09red/mmu:18752%09red/mmu:18212%09red/mmu:21926%09red/mmu:12475%09red/mmu:19419%09red/mmu:16176%09red/mmu:16175%09red/mmu:26399%09red/mmu:16178%09red/mmu:240168%09red/mmu:15511%09red
Mineral absorption	KEGG PATHWAY	mmu04978	5	45	0.00279781	0.0148909	ENSMUSG00000031762|ENSMUSG00000005413|ENSMUSG00000024661|ENSMUSG00000031765|ENSMUSG00000026177	http://www.genome.jp/kegg-bin/show_pathway?mmu04978/mmu:17750%09red/mmu:17748%09red/mmu:14319%09red/mmu:18173%09red/mmu:15368%09red
Focal adhesion	KEGG PATHWAY	mmu04510	11	202	0.0031415	0.0164598	ENSMUSG00000040152|ENSMUSG00000020901|ENSMUSG00000028364|ENSMUSG00000026768|ENSMUSG00000032796|ENSMUSG00000029304|ENSMUSG00000004791|ENSMUSG00000078816|ENSMUSG00000044951|ENSMUSG00000074923|ENSMUSG00000020469	http://www.genome.jp/kegg-bin/show_pathway?mmu04510/mmu:18752%09red/mmu:238564%09red/mmu:241226%09red/mmu:320207%09red/mmu:18654%09red/mmu:16772%09red/mmu:21923%09red/mmu:214230%09red/mmu:20750%09red/mmu:17898%09red/mmu:21825%09red
Autoimmune thyroid disease	KEGG PATHWAY	mmu05320	6	70	0.00361983	0.0183569	ENSMUSG00000037548|ENSMUSG00000053835|ENSMUSG00000036594|ENSMUSG00000060586|ENSMUSG00000037202|ENSMUSG00000041538	http://www.genome.jp/kegg-bin/show_pathway?mmu05320/mmu:15002%09red/mmu:15000%09red/mmu:15042%09red/mmu:14960%09red/mmu:18646%09red/mmu:14969%09red
Leukocyte transendothelial migration	KEGG PATHWAY	mmu04670	8	122	0.00395208	0.0198609	ENSMUSG00000020395|ENSMUSG00000030786|ENSMUSG00000004864|ENSMUSG00000020901|ENSMUSG00000015950|ENSMUSG00000078816|ENSMUSG00000071715|ENSMUSG00000020469	http://www.genome.jp/kegg-bin/show_pathway?mmu04670/mmu:16428%09red/mmu:26415%09red/mmu:18752%09red/mmu:16409%09red/mmu:320207%09red/mmu:17972%09red/mmu:17969%09red/mmu:17898%09red
Circadian rhythm	KEGG PATHWAY	mmu04710	4	30	0.00411321	0.0204909	ENSMUSG00000030103|ENSMUSG00000020038|ENSMUSG00000028150|ENSMUSG00000068742	http://www.genome.jp/kegg-bin/show_pathway?mmu04710/mmu:12953%09red/mmu:12952%09red/mmu:20893%09red/mmu:19885%09red
Adipocytokine signaling pathway	KEGG PATHWAY	mmu04920	6	72	0.00411757	0.0204909	ENSMUSG00000027513|ENSMUSG00000053113|ENSMUSG00000024401|ENSMUSG00000028599|ENSMUSG00000022878|ENSMUSG00000028645	http://www.genome.jp/kegg-bin/show_pathway?mmu04920/mmu:12702%09red/mmu:20525%09red/mmu:18534%09red/mmu:21938%09red/mmu:11450%09red/mmu:21926%09red
Sphingolipid signaling pathway	KEGG PATHWAY	mmu04071	8	123	0.00413958	0.020567	ENSMUSG00000004864|ENSMUSG00000050931|ENSMUSG00000020901|ENSMUSG00000050511|ENSMUSG00000028978|ENSMUSG00000078816|ENSMUSG00000024401|ENSMUSG00000058715	http://www.genome.jp/kegg-bin/show_pathway?mmu04071/mmu:14127%09red/mmu:26415%09red/mmu:18752%09red/mmu:18386%09red/mmu:74442%09red/mmu:320207%09red/mmu:18127%09red/mmu:21926%09red
HTLV-I infection	KEGG PATHWAY	mmu05166	13	277	0.00467326	0.0227029	ENSMUSG00000020901|ENSMUSG00000037548|ENSMUSG00000053835|ENSMUSG00000036594|ENSMUSG00000060586|ENSMUSG00000032094|ENSMUSG00000073802|ENSMUSG00000032093|ENSMUSG00000024401|ENSMUSG00000026073|ENSMUSG00000041538|ENSMUSG00000022996|ENSMUSG00000028645	http://www.genome.jp/kegg-bin/show_pathway?mmu05166/mmu:14969%09red/mmu:22410%09red/mmu:20525%09red/mmu:12579%09red/mmu:320207%09red/mmu:15002%09red/mmu:12500%09red/mmu:15000%09red/mmu:15042%09red/mmu:14960%09red/mmu:12501%09red/mmu:16178%09red/mmu:21926%09red
Rap1 signaling pathway	KEGG PATHWAY	mmu04015	11	216	0.00506348	0.0241017	ENSMUSG00000020623|ENSMUSG00000026821|ENSMUSG00000040152|ENSMUSG00000030786|ENSMUSG00000078816|ENSMUSG00000004864|ENSMUSG00000020901|ENSMUSG00000004791|ENSMUSG00000019966|ENSMUSG00000071042|ENSMUSG00000045551	http://www.genome.jp/kegg-bin/show_pathway?mmu04015/mmu:17311%09red/mmu:26415%09red/mmu:18752%09red/mmu:16409%09red/mmu:26399%09red/mmu:320207%09red/mmu:19730%09red/mmu:18654%09red/mmu:14293%09red/mmu:21825%09red/mmu:240168%09red
African trypanosomiasis	KEGG PATHWAY	mmu05143	4	33	0.00559628	0.0261965	ENSMUSG00000078816|ENSMUSG00000027398|ENSMUSG00000026582|ENSMUSG00000024401	http://www.genome.jp/kegg-bin/show_pathway?mmu05143/mmu:20339%09red/mmu:18752%09red/mmu:21926%09red/mmu:16176%09red
Cell adhesion molecules (CAMs)	KEGG PATHWAY	mmu04514	9	161	0.00617257	0.0283245	ENSMUSG00000053044|ENSMUSG00000030786|ENSMUSG00000037548|ENSMUSG00000053835|ENSMUSG00000026768|ENSMUSG00000036594|ENSMUSG00000026582|ENSMUSG00000060586|ENSMUSG00000041538	http://www.genome.jp/kegg-bin/show_pathway?mmu04514/mmu:20339%09red/mmu:16409%09red/mmu:241226%09red/mmu:15002%09red/mmu:15000%09red/mmu:15042%09red/mmu:14960%09red/mmu:12526%09red/mmu:14969%09red
Viral myocarditis	KEGG PATHWAY	mmu05416	6	79	0.00626237	0.028608	ENSMUSG00000037548|ENSMUSG00000053835|ENSMUSG00000036594|ENSMUSG00000060586|ENSMUSG00000037202|ENSMUSG00000041538	http://www.genome.jp/kegg-bin/show_pathway?mmu05416/mmu:15002%09red/mmu:15000%09red/mmu:15042%09red/mmu:14960%09red/mmu:18646%09red/mmu:14969%09red
FoxO signaling pathway	KEGG PATHWAY	mmu04068	8	134	0.00668493	0.0300454	ENSMUSG00000027513|ENSMUSG00000020901|ENSMUSG00000003882|ENSMUSG00000019970|ENSMUSG00000006818|ENSMUSG00000004864|ENSMUSG00000073802|ENSMUSG00000039304	http://www.genome.jp/kegg-bin/show_pathway?mmu04068/mmu:26415%09red/mmu:20393%09red/mmu:12579%09red/mmu:320207%09red/mmu:22035%09red/mmu:18534%09red/mmu:20656%09red/mmu:16197%09red
TGF-beta signaling pathway	KEGG PATHWAY	mmu04350	6	84	0.0082258	0.0347526	ENSMUSG00000040152|ENSMUSG00000073802|ENSMUSG00000041324|ENSMUSG00000037035|ENSMUSG00000024401|ENSMUSG00000021765	http://www.genome.jp/kegg-bin/show_pathway?mmu04350/mmu:12579%09red/mmu:14313%09red/mmu:16323%09red/mmu:21825%09red/mmu:21926%09red/mmu:16324%09red
Cytosolic DNA-sensing pathway	KEGG PATHWAY	mmu04623	5	61	0.00917253	0.0379925	ENSMUSG00000035042|ENSMUSG00000027398|ENSMUSG00000018930|ENSMUSG00000030793|ENSMUSG00000042349	http://www.genome.jp/kegg-bin/show_pathway?mmu04623/mmu:56489%09red/mmu:20303%09red/mmu:16176%09red/mmu:66824%09red/mmu:20304%09red
Aldosterone-regulated sodium reabsorption	KEGG PATHWAY	mmu04960	4	40	0.0103444	0.0411085	ENSMUSG00000047281|ENSMUSG00000078816|ENSMUSG00000020901|ENSMUSG00000019970	http://www.genome.jp/kegg-bin/show_pathway?mmu04960/mmu:320207%09red/mmu:18752%09red/mmu:20393%09red/mmu:55948%09red
Epstein-Barr virus infection	KEGG PATHWAY	mmu05169	10	210	0.0112311	0.0440188	ENSMUSG00000020623|ENSMUSG00000026616|ENSMUSG00000020901|ENSMUSG00000090877|ENSMUSG00000053835|ENSMUSG00000030724|ENSMUSG00000004864|ENSMUSG00000041608|ENSMUSG00000091971|ENSMUSG00000019850	http://www.genome.jp/kegg-bin/show_pathway?mmu05169/mmu:193740%09red/mmu:12478%09red/mmu:215446%09red/mmu:26399%09red/mmu:320207%09red/mmu:12902%09red/mmu:26415%09red/mmu:15042%09red/mmu:21929%09red/mmu:15511%09red
Fc epsilon RI signaling pathway	KEGG PATHWAY	mmu04664	5	67	0.013073	0.0489218	ENSMUSG00000020901|ENSMUSG00000024401|ENSMUSG00000058715|ENSMUSG00000020623|ENSMUSG00000004864	http://www.genome.jp/kegg-bin/show_pathway?mmu04664/mmu:26399%09red/mmu:26415%09red/mmu:320207%09red/mmu:21926%09red/mmu:14127%09red
Neuroactive ligand-receptor interaction	KEGG PATHWAY	mmu04080	12	286	0.014245	0.0525058	ENSMUSG00000050921|ENSMUSG00000028036|ENSMUSG00000023132|ENSMUSG00000059588|ENSMUSG00000045551|ENSMUSG00000048779|ENSMUSG00000045613|ENSMUSG00000052270|ENSMUSG00000050511|ENSMUSG00000044338|ENSMUSG00000040552|ENSMUSG00000056529	http://www.genome.jp/kegg-bin/show_pathway?mmu04080/mmu:14293%09red/mmu:18386%09red/mmu:14938%09red/mmu:14289%09red/mmu:233571%09red/mmu:23796%09red/mmu:243764%09red/mmu:19204%09red/mmu:12267%09red/mmu:19220%09red/mmu:54598%09red/mmu:78826%09red
Tryptophan metabolism	KEGG PATHWAY	mmu00380	4	46	0.0160299	0.0574601	ENSMUSG00000032315|ENSMUSG00000024087|ENSMUSG00000039783|ENSMUSG00000000673	http://www.genome.jp/kegg-bin/show_pathway?mmu00380/mmu:13076%09red/mmu:107766%09red/mmu:13078%09red/mmu:98256%09red
Ras signaling pathway	KEGG PATHWAY	mmu04014	10	228	0.0185067	0.0639797	ENSMUSG00000026821|ENSMUSG00000027347|ENSMUSG00000020901|ENSMUSG00000002847|ENSMUSG00000024883|ENSMUSG00000078816|ENSMUSG00000004791|ENSMUSG00000019966|ENSMUSG00000071042|ENSMUSG00000074923	http://www.genome.jp/kegg-bin/show_pathway?mmu04014/mmu:17311%09red/mmu:18752%09red/mmu:320207%09red/mmu:19730%09red/mmu:85031%09red/mmu:18654%09red/mmu:19419%09red/mmu:214230%09red/mmu:225870%09red/mmu:240168%09red
Amyotrophic lateral sclerosis (ALS)	KEGG PATHWAY	mmu05014	4	52	0.0233614	0.0774836	ENSMUSG00000004864|ENSMUSG00000024401|ENSMUSG00000020623|ENSMUSG00000028599	http://www.genome.jp/kegg-bin/show_pathway?mmu05014/mmu:21938%09red/mmu:26415%09red/mmu:21926%09red/mmu:26399%09red
Insulin resistance	KEGG PATHWAY	mmu04931	6	110	0.0258723	0.0830246	ENSMUSG00000027513|ENSMUSG00000020901|ENSMUSG00000053113|ENSMUSG00000028978|ENSMUSG00000024401|ENSMUSG00000028645	http://www.genome.jp/kegg-bin/show_pathway?mmu04931/mmu:12702%09red/mmu:20525%09red/mmu:320207%09red/mmu:18534%09red/mmu:18127%09red/mmu:21926%09red
Transcriptional misregulation in cancer	KEGG PATHWAY	mmu05202	8	174	0.0263077	0.0841571	ENSMUSG00000030786|ENSMUSG00000035356|ENSMUSG00000031538|ENSMUSG00000051439|ENSMUSG00000058254|ENSMUSG00000037944|ENSMUSG00000026073|ENSMUSG00000014030	http://www.genome.jp/kegg-bin/show_pathway?mmu05202/mmu:12775%09red/mmu:16409%09red/mmu:80859%09red/mmu:18507%09red/mmu:12475%09red/mmu:18791%09red/mmu:16178%09red/mmu:21912%09red
ECM-receptor interaction	KEGG PATHWAY	mmu04512	5	83	0.0285386	0.0900709	ENSMUSG00000029304|ENSMUSG00000028364|ENSMUSG00000026768|ENSMUSG00000032796|ENSMUSG00000040152	http://www.genome.jp/kegg-bin/show_pathway?mmu04512/mmu:21923%09red/mmu:241226%09red/mmu:16772%09red/mmu:20750%09red/mmu:21825%09red
PPAR signaling pathway	KEGG PATHWAY	mmu03320	5	85	0.0310405	0.0950769	ENSMUSG00000027513|ENSMUSG00000027533|ENSMUSG00000022878|ENSMUSG00000027875|ENSMUSG00000054422	http://www.genome.jp/kegg-bin/show_pathway?mmu03320/mmu:11450%09red/mmu:18534%09red/mmu:16592%09red/mmu:14080%09red/mmu:15360%09red
Fc gamma R-mediated phagocytosis	KEGG PATHWAY	mmu04666	5	86	0.0323413	0.0982327	ENSMUSG00000078816|ENSMUSG00000026656|ENSMUSG00000020901|ENSMUSG00000047945|ENSMUSG00000015950	http://www.genome.jp/kegg-bin/show_pathway?mmu04666/mmu:320207%09red/mmu:18752%09red/mmu:14130%09red/mmu:17969%09red/mmu:17357%09red
Regulation of actin cytoskeleton	KEGG PATHWAY	mmu04810	9	216	0.0324396	0.0982327	ENSMUSG00000051439|ENSMUSG00000045613|ENSMUSG00000030786|ENSMUSG00000028068|ENSMUSG00000026768|ENSMUSG00000020901|ENSMUSG00000044951|ENSMUSG00000074923|ENSMUSG00000020469	http://www.genome.jp/kegg-bin/show_pathway?mmu04810/mmu:320207%09red/mmu:404710%09red/mmu:16409%09red/mmu:238564%09red/mmu:241226%09red/mmu:243764%09red/mmu:12475%09red/mmu:214230%09red/mmu:17898%09red
VEGF signaling pathway	KEGG PATHWAY	mmu04370	4	60	0.0358598	0.105971	ENSMUSG00000078816|ENSMUSG00000028978|ENSMUSG00000020901|ENSMUSG00000004864	http://www.genome.jp/kegg-bin/show_pathway?mmu04370/mmu:320207%09red/mmu:26415%09red/mmu:18752%09red/mmu:18127%09red
Platelet activation	KEGG PATHWAY	mmu04611	6	121	0.0378651	0.109207	ENSMUSG00000020901|ENSMUSG00000004864|ENSMUSG00000027347|ENSMUSG00000028978|ENSMUSG00000044951|ENSMUSG00000058715	http://www.genome.jp/kegg-bin/show_pathway?mmu04611/mmu:14127%09red/mmu:26415%09red/mmu:238564%09red/mmu:320207%09red/mmu:19419%09red/mmu:18127%09red
Protein digestion and absorption	KEGG PATHWAY	mmu04974	5	90	0.0378819	0.109207	ENSMUSG00000023243|ENSMUSG00000004098|ENSMUSG00000022371|ENSMUSG00000035000|ENSMUSG00000022180	http://www.genome.jp/kegg-bin/show_pathway?mmu04974/mmu:12818%09red/mmu:50934%09red/mmu:16529%09red/mmu:13482%09red/mmu:53867%09red
Inflammatory mediator regulation of TRP channels	KEGG PATHWAY	mmu04750	6	125	0.0429771	0.119509	ENSMUSG00000020623|ENSMUSG00000020901|ENSMUSG00000004864|ENSMUSG00000015224|ENSMUSG00000078816|ENSMUSG00000027398	http://www.genome.jp/kegg-bin/show_pathway?mmu04750/mmu:26415%09red/mmu:18752%09red/mmu:26399%09red/mmu:320207%09red/mmu:16176%09red/mmu:74519%09red
Longevity regulating pathway - multiple species	KEGG PATHWAY	mmu04213	4	64	0.0433086	0.12014	ENSMUSG00000020901|ENSMUSG00000090877|ENSMUSG00000091971|ENSMUSG00000006818	http://www.genome.jp/kegg-bin/show_pathway?mmu04213/mmu:20656%09red/mmu:320207%09red/mmu:15511%09red/mmu:193740%09red
Glycolysis / Gluconeogenesis	KEGG PATHWAY	mmu00010	4	65	0.0452965	0.124825	ENSMUSG00000027513|ENSMUSG00000057666|ENSMUSG00000000628|ENSMUSG00000032294	http://www.genome.jp/kegg-bin/show_pathway?mmu00010/mmu:18534%09red/mmu:14433%09red/mmu:18746%09red/mmu:15277%09red
Central carbon metabolism in cancer	KEGG PATHWAY	mmu05230	4	66	0.0473346	0.12842	ENSMUSG00000020901|ENSMUSG00000000628|ENSMUSG00000032294|ENSMUSG00000028645	http://www.genome.jp/kegg-bin/show_pathway?mmu05230/mmu:20525%09red/mmu:320207%09red/mmu:18746%09red/mmu:15277%09red
Renal cell carcinoma	KEGG PATHWAY	mmu05211	4	66	0.0473346	0.12842	ENSMUSG00000020901|ENSMUSG00000035105|ENSMUSG00000074923|ENSMUSG00000028645	http://www.genome.jp/kegg-bin/show_pathway?mmu05211/mmu:214230%09red/mmu:112407%09red/mmu:320207%09red/mmu:20525%09red
Pathways in cancer	KEGG PATHWAY	mmu05200	13	393	0.0551983	0.145002	ENSMUSG00000020826|ENSMUSG00000026821|ENSMUSG00000027347|ENSMUSG00000020901|ENSMUSG00000035105|ENSMUSG00000032796|ENSMUSG00000078816|ENSMUSG00000073802|ENSMUSG00000004791|ENSMUSG00000019966|ENSMUSG00000071042|ENSMUSG00000022996|ENSMUSG00000028645	http://www.genome.jp/kegg-bin/show_pathway?mmu05200/mmu:16772%09red/mmu:17311%09red/mmu:112407%09red/mmu:18752%09red/mmu:20525%09red/mmu:12579%09red/mmu:320207%09red/mmu:19730%09red/mmu:18654%09red/mmu:22410%09red/mmu:19419%09red/mmu:18126%09red/mmu:240168%09red
Choline metabolism in cancer	KEGG PATHWAY	mmu05231	5	101	0.0559556	0.146508	ENSMUSG00000078816|ENSMUSG00000020901|ENSMUSG00000026821|ENSMUSG00000020334|ENSMUSG00000023828	http://www.genome.jp/kegg-bin/show_pathway?mmu05231/mmu:320207%09red/mmu:18752%09red/mmu:19730%09red/mmu:30805%09red/mmu:20519%09red
Proteoglycans in cancer	KEGG PATHWAY	mmu05205	8	206	0.0584084	0.150593	ENSMUSG00000021477|ENSMUSG00000040152|ENSMUSG00000020901|ENSMUSG00000027995|ENSMUSG00000004864|ENSMUSG00000078816|ENSMUSG00000024401|ENSMUSG00000022996	http://www.genome.jp/kegg-bin/show_pathway?mmu05205/mmu:26415%09red/mmu:22410%09red/mmu:13039%09red/mmu:320207%09red/mmu:18752%09red/mmu:24088%09red/mmu:21825%09red/mmu:21926%09red
Hepatitis C	KEGG PATHWAY	mmu05160	6	136	0.0591814	0.152522	ENSMUSG00000020901|ENSMUSG00000042349|ENSMUSG00000004864|ENSMUSG00000053113|ENSMUSG00000031639|ENSMUSG00000024401	http://www.genome.jp/kegg-bin/show_pathway?mmu05160/mmu:12702%09red/mmu:320207%09red/mmu:26415%09red/mmu:56489%09red/mmu:142980%09red/mmu:21926%09red
Prolactin signaling pathway	KEGG PATHWAY	mmu04917	4	74	0.0654305	0.164543	ENSMUSG00000020901|ENSMUSG00000022015|ENSMUSG00000053113|ENSMUSG00000004864	http://www.genome.jp/kegg-bin/show_pathway?mmu04917/mmu:12702%09red/mmu:320207%09red/mmu:26415%09red/mmu:21943%09red
ABC transporters	KEGG PATHWAY	mmu02010	3	46	0.0696915	0.172497	ENSMUSG00000004668|ENSMUSG00000029802|ENSMUSG00000029299	http://www.genome.jp/kegg-bin/show_pathway?mmu02010/mmu:27405%09red/mmu:26357%09red/mmu:268379%09red
Calcium signaling pathway	KEGG PATHWAY	mmu04020	7	180	0.0733197	0.179232	ENSMUSG00000045613|ENSMUSG00000028036|ENSMUSG00000020826|ENSMUSG00000078816|ENSMUSG00000044951|ENSMUSG00000056529|ENSMUSG00000028978	http://www.genome.jp/kegg-bin/show_pathway?mmu04020/mmu:18752%09red/mmu:238564%09red/mmu:243764%09red/mmu:19204%09red/mmu:19220%09red/mmu:18126%09red/mmu:18127%09red
Hepatitis B	KEGG PATHWAY	mmu05161	6	145	0.0748152	0.182742	ENSMUSG00000020901|ENSMUSG00000027995|ENSMUSG00000042349|ENSMUSG00000031639|ENSMUSG00000078816|ENSMUSG00000024401	http://www.genome.jp/kegg-bin/show_pathway?mmu05161/mmu:18752%09red/mmu:320207%09red/mmu:56489%09red/mmu:24088%09red/mmu:142980%09red/mmu:21926%09red
Biosynthesis of amino acids	KEGG PATHWAY	mmu01230	4	78	0.0756486	0.184191	ENSMUSG00000057666|ENSMUSG00000019987|ENSMUSG00000076441|ENSMUSG00000032294	http://www.genome.jp/kegg-bin/show_pathway?mmu01230/mmu:11846%09red/mmu:11898%09red/mmu:14433%09red/mmu:18746%09red
Terpenoid backbone biosynthesis	KEGG PATHWAY	mmu00900	2	22	0.0785216	0.189082	ENSMUSG00000027952|ENSMUSG00000027875	http://www.genome.jp/kegg-bin/show_pathway?mmu00900/mmu:68603%09red/mmu:15360%09red
Non-alcoholic fatty liver disease (NAFLD)	KEGG PATHWAY	mmu04932	6	147	0.0785797	0.189147	ENSMUSG00000020901|ENSMUSG00000053113|ENSMUSG00000024401|ENSMUSG00000027399|ENSMUSG00000027398|ENSMUSG00000022878	http://www.genome.jp/kegg-bin/show_pathway?mmu04932/mmu:12702%09red/mmu:320207%09red/mmu:16176%09red/mmu:16175%09red/mmu:11450%09red/mmu:21926%09red
mTOR signaling pathway	KEGG PATHWAY	mmu04150	6	155	0.09468	0.221124	ENSMUSG00000020901|ENSMUSG00000019970|ENSMUSG00000024401|ENSMUSG00000078816|ENSMUSG00000020108|ENSMUSG00000022996	http://www.genome.jp/kegg-bin/show_pathway?mmu04150/mmu:18752%09red/mmu:20393%09red/mmu:320207%09red/mmu:74747%09red/mmu:22410%09red/mmu:21926%09red
Small cell lung cancer	KEGG PATHWAY	mmu05222	4	85	0.0953237	0.221867	ENSMUSG00000020901|ENSMUSG00000020826|ENSMUSG00000073802|ENSMUSG00000032796	http://www.genome.jp/kegg-bin/show_pathway?mmu05222/mmu:16772%09red/mmu:12579%09red/mmu:320207%09red/mmu:18126%09red
Gap junction	KEGG PATHWAY	mmu04540	4	86	0.0983136	0.2271	ENSMUSG00000078816|ENSMUSG00000062591|ENSMUSG00000043091|ENSMUSG00000001473	http://www.genome.jp/kegg-bin/show_pathway?mmu04540/mmu:67951%09red/mmu:18752%09red/mmu:22153%09red/mmu:22146%09red
Metabolic pathways	KEGG PATHWAY	mmu01100	32	1268	0.101547	0.233765	ENSMUSG00000029762|ENSMUSG00000076441|ENSMUSG00000000673|ENSMUSG00000029695|ENSMUSG00000040675|ENSMUSG00000020638|ENSMUSG00000020826|ENSMUSG00000050737|ENSMUSG00000051048|ENSMUSG00000028766|ENSMUSG00000028633|ENSMUSG00000011148|ENSMUSG00000027952|ENSMUSG00000028978|ENSMUSG00000021622|ENSMUSG00000032315|ENSMUSG00000027513|ENSMUSG00000050931|ENSMUSG00000029727|ENSMUSG00000023913|ENSMUSG00000017697|…	http://www.genome.jp/kegg-bin/show_pathway?mmu01100/mmu:11846%09red/mmu:13113%09red/mmu:270084%09red/mmu:15360%09red/mmu:234515%09red/mmu:27226%09red/mmu:14187%09red/mmu:18746%09red/mmu:67800%09red/mmu:74442%09red/mmu:22169%09red/mmu:30956%09red/mmu:51797%09red/mmu:320452%09red/mmu:11486%09red/mmu:11898%09red/mmu:14433%09red/mmu:64292%09red/mmu:107766%09red/mmu:15277%09red/mmu:11565%09red/mmu:982…
ErbB signaling pathway	KEGG PATHWAY	mmu04012	4	88	0.104423	0.237451	ENSMUSG00000078816|ENSMUSG00000020901|ENSMUSG00000029377|ENSMUSG00000074923	http://www.genome.jp/kegg-bin/show_pathway?mmu04012/mmu:320207%09red/mmu:18752%09red/mmu:214230%09red/mmu:13874%09red
Jak-STAT signaling pathway	KEGG PATHWAY	mmu04630	6	161	0.107828	0.238371	ENSMUSG00000024014|ENSMUSG00000020901|ENSMUSG00000003882|ENSMUSG00000030748|ENSMUSG00000053113|ENSMUSG00000071714	http://www.genome.jp/kegg-bin/show_pathway?mmu04630/mmu:12702%09red/mmu:320207%09red/mmu:12984%09red/mmu:16190%09red/mmu:16197%09red/mmu:18712%09red
Butirosin and neomycin biosynthesis	KEGG PATHWAY	mmu00524	1	5	0.111064	0.238371	ENSMUSG00000000628	http://www.genome.jp/kegg-bin/show_pathway?mmu00524/mmu:15277%09red
Ovarian steroidogenesis	KEGG PATHWAY	mmu04913	3	58	0.115351	0.245191	ENSMUSG00000015224|ENSMUSG00000032315|ENSMUSG00000024087	http://www.genome.jp/kegg-bin/show_pathway?mmu04913/mmu:13076%09red/mmu:74519%09red/mmu:13078%09red
Chemical carcinogenesis	KEGG PATHWAY	mmu05204	4	94	0.123744	0.258621	ENSMUSG00000029727|ENSMUSG00000032315|ENSMUSG00000024087|ENSMUSG00000030711	http://www.genome.jp/kegg-bin/show_pathway?mmu05204/mmu:13113%09red/mmu:13076%09red/mmu:20887%09red/mmu:13078%09red
Estrogen signaling pathway	KEGG PATHWAY	mmu04915	4	97	0.133934	0.268219	ENSMUSG00000028978|ENSMUSG00000020901|ENSMUSG00000091971|ENSMUSG00000090877	http://www.genome.jp/kegg-bin/show_pathway?mmu04915/mmu:193740%09red/mmu:320207%09red/mmu:18127%09red/mmu:15511%09red
Galactose metabolism	KEGG PATHWAY	mmu00052	2	32	0.140978	0.276649	ENSMUSG00000029762|ENSMUSG00000000628	http://www.genome.jp/kegg-bin/show_pathway?mmu00052/mmu:14187%09red/mmu:15277%09red
Signaling pathways regulating pluripotency of stem cells	KEGG PATHWAY	mmu04550	5	140	0.15261	0.287836	ENSMUSG00000020901|ENSMUSG00000037035|ENSMUSG00000041324|ENSMUSG00000022996|ENSMUSG00000004864	http://www.genome.jp/kegg-bin/show_pathway?mmu04550/mmu:16323%09red/mmu:320207%09red/mmu:22410%09red/mmu:26415%09red/mmu:16324%09red
RIG-I-like receptor signaling pathway	KEGG PATHWAY	mmu04622	3	68	0.159855	0.293415	ENSMUSG00000004864|ENSMUSG00000024401|ENSMUSG00000042349	http://www.genome.jp/kegg-bin/show_pathway?mmu04622/mmu:56489%09red/mmu:21926%09red/mmu:26415%09red
Fructose and mannose metabolism	KEGG PATHWAY	mmu00051	2	35	0.161319	0.293415	ENSMUSG00000029762|ENSMUSG00000000628	http://www.genome.jp/kegg-bin/show_pathway?mmu00051/mmu:14187%09red/mmu:15277%09red
Phospholipase D signaling pathway	KEGG PATHWAY	mmu04072	5	144	0.165066	0.298199	ENSMUSG00000020901|ENSMUSG00000058715|ENSMUSG00000028036|ENSMUSG00000026821|ENSMUSG00000019966	http://www.genome.jp/kegg-bin/show_pathway?mmu04072/mmu:14127%09red/mmu:19220%09red/mmu:320207%09red/mmu:19730%09red/mmu:17311%09red
Renin secretion	KEGG PATHWAY	mmu04924	3	70	0.169312	0.304702	ENSMUSG00000028255|ENSMUSG00000031980|ENSMUSG00000021939	http://www.genome.jp/kegg-bin/show_pathway?mmu04924/mmu:13030%09red/mmu:11606%09red/mmu:23844%09red
Bile secretion	KEGG PATHWAY	mmu04976	3	71	0.1741	0.310094	ENSMUSG00000063975|ENSMUSG00000029802|ENSMUSG00000028645	http://www.genome.jp/kegg-bin/show_pathway?mmu04976/mmu:26357%09red/mmu:20525%09red/mmu:108096%09red
Alanine, aspartate and glutamate metabolism	KEGG PATHWAY	mmu00250	2	37	0.175157	0.310094	ENSMUSG00000011148|ENSMUSG00000076441	http://www.genome.jp/kegg-bin/show_pathway?mmu00250/mmu:11565%09red/mmu:11898%09red
Adrenergic signaling in cardiomyocytes	KEGG PATHWAY	mmu04261	5	148	0.17791	0.310094	ENSMUSG00000020901|ENSMUSG00000004864|ENSMUSG00000019194|ENSMUSG00000061086|ENSMUSG00000034810	http://www.genome.jp/kegg-bin/show_pathway?mmu04261/mmu:20266%09red/mmu:26415%09red/mmu:320207%09red/mmu:17896%09red/mmu:20272%09red
Pyruvate metabolism	KEGG PATHWAY	mmu00620	2	39	0.189173	0.323202	ENSMUSG00000027513|ENSMUSG00000032294	http://www.genome.jp/kegg-bin/show_pathway?mmu00620/mmu:18534%09red/mmu:18746%09red
Adherens junction	KEGG PATHWAY	mmu04520	3	75	0.193616	0.323202	ENSMUSG00000042821|ENSMUSG00000025314|ENSMUSG00000022676	http://www.genome.jp/kegg-bin/show_pathway?mmu04520/mmu:20613%09red/mmu:20583%09red/mmu:19271%09red
Fat digestion and absorption	KEGG PATHWAY	mmu04975	2	40	0.196238	0.325698	ENSMUSG00000030747|ENSMUSG00000054422	http://www.genome.jp/kegg-bin/show_pathway?mmu04975/mmu:14080%09red/mmu:67800%09red
Salivary secretion	KEGG PATHWAY	mmu04970	3	77	0.20357	0.335137	ENSMUSG00000078816|ENSMUSG00000044217|ENSMUSG00000066108	http://www.genome.jp/kegg-bin/show_pathway?mmu04970/mmu:74180%09red/mmu:18752%09red/mmu:11830%09red
Synthesis and degradation of ketone bodies	KEGG PATHWAY	mmu00072	1	11	0.209816	0.335137	ENSMUSG00000027875	http://www.genome.jp/kegg-bin/show_pathway?mmu00072/mmu:15360%09red
Ether lipid metabolism	KEGG PATHWAY	mmu00565	2	44	0.224778	0.348341	ENSMUSG00000023913|ENSMUSG00000033192	http://www.genome.jp/kegg-bin/show_pathway?mmu00565/mmu:270084%09red/mmu:27226%09red
Carbohydrate digestion and absorption	KEGG PATHWAY	mmu04973	2	45	0.231965	0.357309	ENSMUSG00000020901|ENSMUSG00000000628	http://www.genome.jp/kegg-bin/show_pathway?mmu04973/mmu:320207%09red/mmu:15277%09red
Neurotrophin signaling pathway	KEGG PATHWAY	mmu04722	4	123	0.234054	0.359932	ENSMUSG00000020901|ENSMUSG00000004864|ENSMUSG00000020227|ENSMUSG00000055254	http://www.genome.jp/kegg-bin/show_pathway?mmu04722/mmu:73914%09red/mmu:26415%09red/mmu:320207%09red/mmu:18212%09red
Peroxisome	KEGG PATHWAY	mmu04146	3	83	0.234079	0.359932	ENSMUSG00000020826|ENSMUSG00000027952|ENSMUSG00000006818	http://www.genome.jp/kegg-bin/show_pathway?mmu04146/mmu:20656%09red/mmu:68603%09red/mmu:18126%09red
Folate biosynthesis	KEGG PATHWAY	mmu00790	1	13	0.240238	0.361419	ENSMUSG00000028766	http://www.genome.jp/kegg-bin/show_pathway?mmu00790/mmu:11647%09red
Vascular smooth muscle contraction	KEGG PATHWAY	mmu04270	4	127	0.250864	0.376388	ENSMUSG00000078816|ENSMUSG00000044951|ENSMUSG00000059588|ENSMUSG00000041046	http://www.genome.jp/kegg-bin/show_pathway?mmu04270/mmu:18752%09red/mmu:54598%09red/mmu:56089%09red/mmu:238564%09red
Steroid hormone biosynthesis	KEGG PATHWAY	mmu00140	3	87	0.254846	0.376937	ENSMUSG00000029727|ENSMUSG00000032315|ENSMUSG00000024087	http://www.genome.jp/kegg-bin/show_pathway?mmu00140/mmu:13113%09red/mmu:13076%09red/mmu:13078%09red
Amino sugar and nucleotide sugar metabolism	KEGG PATHWAY	mmu00520	2	49	0.260821	0.384641	ENSMUSG00000000628|ENSMUSG00000016756	http://www.genome.jp/kegg-bin/show_pathway?mmu00520/mmu:12763%09red/mmu:15277%09red
GnRH signaling pathway	KEGG PATHWAY	mmu04912	3	89	0.265326	0.390812	ENSMUSG00000004864|ENSMUSG00000020623|ENSMUSG00000000957	http://www.genome.jp/kegg-bin/show_pathway?mmu04912/mmu:17387%09red/mmu:26399%09red/mmu:26415%09red
Linoleic acid metabolism	KEGG PATHWAY	mmu00591	2	50	0.268046	0.391672	ENSMUSG00000015224|ENSMUSG00000029727	http://www.genome.jp/kegg-bin/show_pathway?mmu00591/mmu:13113%09red/mmu:74519%09red
Axon guidance	KEGG PATHWAY	mmu04360	5	175	0.272705	0.395875	ENSMUSG00000029869|ENSMUSG00000020901|ENSMUSG00000028289|ENSMUSG00000074923|ENSMUSG00000020099	http://www.genome.jp/kegg-bin/show_pathway?mmu04360/mmu:214230%09red/mmu:320207%09red/mmu:13848%09red/mmu:13841%09red/mmu:107449%09red
Purine metabolism	KEGG PATHWAY	mmu00230	5	176	0.276422	0.399964	ENSMUSG00000017697|ENSMUSG00000011148|ENSMUSG00000028525|ENSMUSG00000041608|ENSMUSG00000032294	http://www.genome.jp/kegg-bin/show_pathway?mmu00230/mmu:11486%09red/mmu:11565%09red/mmu:215446%09red/mmu:18746%09red/mmu:18578%09red
Lysine degradation	KEGG PATHWAY	mmu00310	2	52	0.28249	0.403037	ENSMUSG00000032649|ENSMUSG00000029695	http://www.genome.jp/kegg-bin/show_pathway?mmu00310/mmu:30956%09red/mmu:269132%09red
Drug metabolism - other enzymes	KEGG PATHWAY	mmu00983	2	52	0.28249	0.403037	ENSMUSG00000031877|ENSMUSG00000050097	http://www.genome.jp/kegg-bin/show_pathway?mmu00983/mmu:234669%09red/mmu:72361%09red
Primary bile acid biosynthesis	KEGG PATHWAY	mmu00120	1	16	0.283692	0.403037	ENSMUSG00000050370	http://www.genome.jp/kegg-bin/show_pathway?mmu00120/mmu:12642%09red
Endocrine resistance	KEGG PATHWAY	mmu01522	3	95	0.297031	0.414932	ENSMUSG00000020901|ENSMUSG00000004864|ENSMUSG00000014773	http://www.genome.jp/kegg-bin/show_pathway?mmu01522/mmu:26415%09red/mmu:320207%09red/mmu:13388%09red
Longevity regulating pathway	KEGG PATHWAY	mmu04211	3	95	0.297031	0.414932	ENSMUSG00000020901|ENSMUSG00000022878|ENSMUSG00000006818	http://www.genome.jp/kegg-bin/show_pathway?mmu04211/mmu:11450%09red/mmu:320207%09red/mmu:20656%09red
Nitrogen metabolism	KEGG PATHWAY	mmu00910	1	17	0.297619	0.414932	ENSMUSG00000027559	http://www.genome.jp/kegg-bin/show_pathway?mmu00910/mmu:12350%09red
Insulin signaling pathway	KEGG PATHWAY	mmu04910	4	140	0.306954	0.426492	ENSMUSG00000027513|ENSMUSG00000020901|ENSMUSG00000000628|ENSMUSG00000053113	http://www.genome.jp/kegg-bin/show_pathway?mmu04910/mmu:18534%09red/mmu:12702%09red/mmu:320207%09red/mmu:15277%09red
Non-small cell lung cancer	KEGG PATHWAY	mmu05223	2	56	0.311284	0.427082	ENSMUSG00000078816|ENSMUSG00000020901	http://www.genome.jp/kegg-bin/show_pathway?mmu05223/mmu:320207%09red/mmu:18752%09red
Phosphatidylinositol signaling system	KEGG PATHWAY	mmu04070	3	98	0.312973	0.429017	ENSMUSG00000078816|ENSMUSG00000020901|ENSMUSG00000037940	http://www.genome.jp/kegg-bin/show_pathway?mmu04070/mmu:320207%09red/mmu:18752%09red/mmu:234515%09red
Acute myeloid leukemia	KEGG PATHWAY	mmu05221	2	57	0.318448	0.435936	ENSMUSG00000020901|ENSMUSG00000024014	http://www.genome.jp/kegg-bin/show_pathway?mmu05221/mmu:320207%09red/mmu:18712%09red
Wnt signaling pathway	KEGG PATHWAY	mmu04310	4	143	0.320107	0.437849	ENSMUSG00000078816|ENSMUSG00000036158|ENSMUSG00000022996|ENSMUSG00000021567	http://www.genome.jp/kegg-bin/show_pathway?mmu04310/mmu:18752%09red/mmu:22410%09red/mmu:106042%09red/mmu:72293%09red
Glucagon signaling pathway	KEGG PATHWAY	mmu04922	3	100	0.323615	0.439537	ENSMUSG00000027513|ENSMUSG00000032294|ENSMUSG00000028645	http://www.genome.jp/kegg-bin/show_pathway?mmu04922/mmu:18534%09red/mmu:20525%09red/mmu:18746%09red
Melanogenesis	KEGG PATHWAY	mmu04916	3	100	0.323615	0.439537	ENSMUSG00000078816|ENSMUSG00000019966|ENSMUSG00000022996	http://www.genome.jp/kegg-bin/show_pathway?mmu04916/mmu:17311%09red/mmu:18752%09red/mmu:22410%09red
Steroid biosynthesis	KEGG PATHWAY	mmu00100	1	19	0.324666	0.439537	ENSMUSG00000023045	http://www.genome.jp/kegg-bin/show_pathway?mmu00100/mmu:223920%09red
One carbon pool by folate	KEGG PATHWAY	mmu00670	1	19	0.324666	0.439537	ENSMUSG00000040675	http://www.genome.jp/kegg-bin/show_pathway?mmu00670/mmu:270685%09red
Pyrimidine metabolism	KEGG PATHWAY	mmu00240	3	101	0.328937	0.444141	ENSMUSG00000041608|ENSMUSG00000028633|ENSMUSG00000020638	http://www.genome.jp/kegg-bin/show_pathway?mmu00240/mmu:22169%09red/mmu:215446%09red/mmu:51797%09red
Glycerolipid metabolism	KEGG PATHWAY	mmu00561	2	59	0.332722	0.448856	ENSMUSG00000029762|ENSMUSG00000030747	http://www.genome.jp/kegg-bin/show_pathway?mmu00561/mmu:14187%09red/mmu:67800%09red
Proximal tubule bicarbonate reclamation	KEGG PATHWAY	mmu04964	1	22	0.363301	0.473931	ENSMUSG00000027513	http://www.genome.jp/kegg-bin/show_pathway?mmu04964/mmu:18534%09red
Colorectal cancer	KEGG PATHWAY	mmu05210	2	64	0.367994	0.479238	ENSMUSG00000020901|ENSMUSG00000026821	http://www.genome.jp/kegg-bin/show_pathway?mmu05210/mmu:320207%09red/mmu:19730%09red
Glioma	KEGG PATHWAY	mmu05214	2	65	0.374965	0.483189	ENSMUSG00000078816|ENSMUSG00000020901	http://www.genome.jp/kegg-bin/show_pathway?mmu05214/mmu:320207%09red/mmu:18752%09red
Phenylalanine metabolism	KEGG PATHWAY	mmu00360	1	23	0.375682	0.483189	ENSMUSG00000033307	http://www.genome.jp/kegg-bin/show_pathway?mmu00360/mmu:17319%09red
Oxytocin signaling pathway	KEGG PATHWAY	mmu04921	4	157	0.381773	0.489398	ENSMUSG00000078816|ENSMUSG00000044951|ENSMUSG00000020901|ENSMUSG00000028978	http://www.genome.jp/kegg-bin/show_pathway?mmu04921/mmu:320207%09red/mmu:18752%09red/mmu:18127%09red/mmu:238564%09red
Pancreatic cancer	KEGG PATHWAY	mmu05212	2	66	0.381903	0.489398	ENSMUSG00000020901|ENSMUSG00000026821	http://www.genome.jp/kegg-bin/show_pathway?mmu05212/mmu:320207%09red/mmu:19730%09red
Metabolism of xenobiotics by cytochrome P450	KEGG PATHWAY	mmu00980	2	66	0.381903	0.489398	ENSMUSG00000032315|ENSMUSG00000024087	http://www.genome.jp/kegg-bin/show_pathway?mmu00980/mmu:13076%09red/mmu:13078%09red
Cholinergic synapse	KEGG PATHWAY	mmu04725	3	111	0.381948	0.489398	ENSMUSG00000078816|ENSMUSG00000020901|ENSMUSG00000045613	http://www.genome.jp/kegg-bin/show_pathway?mmu04725/mmu:320207%09red/mmu:18752%09red/mmu:243764%09red
p53 signaling pathway	KEGG PATHWAY	mmu04115	2	68	0.39568	0.501124	ENSMUSG00000047281|ENSMUSG00000040152	http://www.genome.jp/kegg-bin/show_pathway?mmu04115/mmu:21825%09red/mmu:55948%09red
Alzheimer's disease	KEGG PATHWAY	mmu05010	4	163	0.408086	0.512449	ENSMUSG00000057666|ENSMUSG00000027398|ENSMUSG00000002985|ENSMUSG00000024401	http://www.genome.jp/kegg-bin/show_pathway?mmu05010/mmu:14433%09red/mmu:21926%09red/mmu:16176%09red/mmu:11816%09red
Carbon metabolism	KEGG PATHWAY	mmu01200	3	116	0.408136	0.512449	ENSMUSG00000057666|ENSMUSG00000000628|ENSMUSG00000032294	http://www.genome.jp/kegg-bin/show_pathway?mmu01200/mmu:14433%09red/mmu:18746%09red/mmu:15277%09red
Thyroid hormone synthesis	KEGG PATHWAY	mmu04918	2	70	0.409314	0.513508	ENSMUSG00000078816|ENSMUSG00000020651	http://www.genome.jp/kegg-bin/show_pathway?mmu04918/mmu:23985%09red/mmu:18752%09red
Thyroid hormone signaling pathway	KEGG PATHWAY	mmu04919	3	117	0.413335	0.515596	ENSMUSG00000078816|ENSMUSG00000020901|ENSMUSG00000028645	http://www.genome.jp/kegg-bin/show_pathway?mmu04919/mmu:320207%09red/mmu:18752%09red/mmu:20525%09red
Collecting duct acid secretion	KEGG PATHWAY	mmu04966	1	27	0.422852	0.523206	ENSMUSG00000006574	http://www.genome.jp/kegg-bin/show_pathway?mmu04966/mmu:20533%09red
Butanoate metabolism	KEGG PATHWAY	mmu00650	1	27	0.422852	0.523206	ENSMUSG00000027875	http://www.genome.jp/kegg-bin/show_pathway?mmu00650/mmu:15360%09red
Gastric acid secretion	KEGG PATHWAY	mmu04971	2	73	0.429478	0.530333	ENSMUSG00000078816|ENSMUSG00000044951	http://www.genome.jp/kegg-bin/show_pathway?mmu04971/mmu:18752%09red/mmu:238564%09red
cGMP-PKG signaling pathway	KEGG PATHWAY	mmu04022	4	172	0.447095	0.543326	ENSMUSG00000028978|ENSMUSG00000044951|ENSMUSG00000020901|ENSMUSG00000050511	http://www.genome.jp/kegg-bin/show_pathway?mmu04022/mmu:320207%09red/mmu:18386%09red/mmu:18127%09red/mmu:238564%09red
AMPK signaling pathway	KEGG PATHWAY	mmu04152	3	127	0.464425	0.558513	ENSMUSG00000027513|ENSMUSG00000020901|ENSMUSG00000022878	http://www.genome.jp/kegg-bin/show_pathway?mmu04152/mmu:18534%09red/mmu:320207%09red/mmu:11450%09red
Other types of O-glycan biosynthesis	KEGG PATHWAY	mmu00514	1	31	0.466465	0.55932	ENSMUSG00000032649	http://www.genome.jp/kegg-bin/show_pathway?mmu00514/mmu:269132%09red
Viral carcinogenesis	KEGG PATHWAY	mmu05203	5	226	0.466948	0.559789	ENSMUSG00000060093|ENSMUSG00000020901|ENSMUSG00000073802|ENSMUSG00000053835|ENSMUSG00000032294	http://www.genome.jp/kegg-bin/show_pathway?mmu05203/mmu:326619%09red/mmu:15042%09red/mmu:12579%09red/mmu:320207%09red/mmu:18746%09red
Endocytosis	KEGG PATHWAY	mmu04144	6	278	0.475481	0.567655	ENSMUSG00000037999|ENSMUSG00000051343|ENSMUSG00000090877|ENSMUSG00000053835|ENSMUSG00000027293|ENSMUSG00000091971	http://www.genome.jp/kegg-bin/show_pathway?mmu04144/mmu:193740%09red/mmu:98878%09red/mmu:15042%09red/mmu:15511%09red/mmu:212285%09red/mmu:52055%09red
Citrate cycle (TCA cycle)	KEGG PATHWAY	mmu00020	1	32	0.476845	0.567655	ENSMUSG00000027513	http://www.genome.jp/kegg-bin/show_pathway?mmu00020/mmu:18534%09red
EGFR tyrosine kinase inhibitor resistance	KEGG PATHWAY	mmu01521	2	81	0.481377	0.571606	ENSMUSG00000078816|ENSMUSG00000020901	http://www.genome.jp/kegg-bin/show_pathway?mmu01521/mmu:320207%09red/mmu:18752%09red
MicroRNAs in cancer	KEGG PATHWAY	mmu05206	6	280	0.48222	0.572413	ENSMUSG00000024087|ENSMUSG00000040152|ENSMUSG00000024014|ENSMUSG00000028364|ENSMUSG00000078816|ENSMUSG00000020108	http://www.genome.jp/kegg-bin/show_pathway?mmu05206/mmu:18752%09red/mmu:74747%09red/mmu:13078%09red/mmu:21923%09red/mmu:21825%09red/mmu:18712%09red
Renin-angiotensin system	KEGG PATHWAY	mmu04614	1	34	0.497003	0.585845	ENSMUSG00000031980	http://www.genome.jp/kegg-bin/show_pathway?mmu04614/mmu:11606%09red
Hypertrophic cardiomyopathy (HCM)	KEGG PATHWAY	mmu05410	2	84	0.500079	0.588566	ENSMUSG00000024401|ENSMUSG00000026768	http://www.genome.jp/kegg-bin/show_pathway?mmu05410/mmu:241226%09red/mmu:21926%09red
Insulin secretion	KEGG PATHWAY	mmu04911	2	85	0.506216	0.594066	ENSMUSG00000078816|ENSMUSG00000028645	http://www.genome.jp/kegg-bin/show_pathway?mmu04911/mmu:18752%09red/mmu:20525%09red
Taste transduction	KEGG PATHWAY	mmu04742	2	87	0.518343	0.604257	ENSMUSG00000023243|ENSMUSG00000057182	http://www.genome.jp/kegg-bin/show_pathway?mmu04742/mmu:16529%09red/mmu:20269%09red
Dilated cardiomyopathy	KEGG PATHWAY	mmu05414	2	88	0.524332	0.610425	ENSMUSG00000024401|ENSMUSG00000026768	http://www.genome.jp/kegg-bin/show_pathway?mmu05414/mmu:241226%09red/mmu:21926%09red
Pentose and glucuronate interconversions	KEGG PATHWAY	mmu00040	1	37	0.525796	0.610781	ENSMUSG00000029762	http://www.genome.jp/kegg-bin/show_pathway?mmu00040/mmu:14187%09red
Arachidonic acid metabolism	KEGG PATHWAY	mmu00590	2	89	0.53027	0.614652	ENSMUSG00000015224|ENSMUSG00000050737	http://www.genome.jp/kegg-bin/show_pathway?mmu00590/mmu:74519%09red/mmu:64292%09red
Progesterone-mediated oocyte maturation	KEGG PATHWAY	mmu04914	2	89	0.53027	0.614652	ENSMUSG00000020901|ENSMUSG00000004864	http://www.genome.jp/kegg-bin/show_pathway?mmu04914/mmu:26415%09red/mmu:320207%09red
Retinol metabolism	KEGG PATHWAY	mmu00830	2	90	0.536158	0.619834	ENSMUSG00000029727|ENSMUSG00000032315	http://www.genome.jp/kegg-bin/show_pathway?mmu00830/mmu:13113%09red/mmu:13076%09red
Morphine addiction	KEGG PATHWAY	mmu05032	2	91	0.541994	0.625519	ENSMUSG00000078816|ENSMUSG00000028525	http://www.genome.jp/kegg-bin/show_pathway?mmu05032/mmu:18578%09red/mmu:18752%09red
Tyrosine metabolism	KEGG PATHWAY	mmu00350	1	39	0.544071	0.626264	ENSMUSG00000033307	http://www.genome.jp/kegg-bin/show_pathway?mmu00350/mmu:17319%09red
Bladder cancer	KEGG PATHWAY	mmu05219	1	41	0.561644	0.640832	ENSMUSG00000040152	http://www.genome.jp/kegg-bin/show_pathway?mmu05219/mmu:21825%09red
Porphyrin and chlorophyll metabolism	KEGG PATHWAY	mmu00860	1	42	0.570175	0.647551	ENSMUSG00000005413	http://www.genome.jp/kegg-bin/show_pathway?mmu00860/mmu:15368%09red
Aminoacyl-tRNA biosynthesis	KEGG PATHWAY	mmu00970	1	44	0.586743	0.662538	ENSMUSG00000035202	http://www.genome.jp/kegg-bin/show_pathway?mmu00970/mmu:102436%09red
Retrograde endocannabinoid signaling	KEGG PATHWAY	mmu04723	2	101	0.597521	0.671883	ENSMUSG00000078816|ENSMUSG00000004864	http://www.genome.jp/kegg-bin/show_pathway?mmu04723/mmu:26415%09red/mmu:18752%09red
Pancreatic secretion	KEGG PATHWAY	mmu04972	2	102	0.602788	0.675449	ENSMUSG00000028255|ENSMUSG00000078816	http://www.genome.jp/kegg-bin/show_pathway?mmu04972/mmu:18752%09red/mmu:23844%09red
Sphingolipid metabolism	KEGG PATHWAY	mmu00600	1	48	0.617993	0.688457	ENSMUSG00000050931	http://www.genome.jp/kegg-bin/show_pathway?mmu00600/mmu:74442%09red
Notch signaling pathway	KEGG PATHWAY	mmu04330	1	49	0.625429	0.694846	ENSMUSG00000014773	http://www.genome.jp/kegg-bin/show_pathway?mmu04330/mmu:13388%09red
Protein processing in endoplasmic reticulum	KEGG PATHWAY	mmu04141	3	163	0.628654	0.698175	ENSMUSG00000046841|ENSMUSG00000091971|ENSMUSG00000090877	http://www.genome.jp/kegg-bin/show_pathway?mmu04141/mmu:193740%09red/mmu:216197%09red/mmu:15511%09red
Endometrial cancer	KEGG PATHWAY	mmu05213	1	52	0.646884	0.711584	ENSMUSG00000020901	http://www.genome.jp/kegg-bin/show_pathway?mmu05213/mmu:320207%09red
Endocrine and other factor-regulated calcium reabsorption	KEGG PATHWAY	mmu04961	1	54	0.660501	0.723057	ENSMUSG00000078816	http://www.genome.jp/kegg-bin/show_pathway?mmu04961/mmu:18752%09red
Basal cell carcinoma	KEGG PATHWAY	mmu05217	1	55	0.667111	0.728082	ENSMUSG00000022996	http://www.genome.jp/kegg-bin/show_pathway?mmu05217/mmu:22410%09red
Starch and sucrose metabolism	KEGG PATHWAY	mmu00500	1	55	0.667111	0.728082	ENSMUSG00000000628	http://www.genome.jp/kegg-bin/show_pathway?mmu00500/mmu:15277%09red
Regulation of lipolysis in adipocytes	KEGG PATHWAY	mmu04923	1	57	0.67995	0.739006	ENSMUSG00000020901	http://www.genome.jp/kegg-bin/show_pathway?mmu04923/mmu:320207%09red
Valine, leucine and isoleucine degradation	KEGG PATHWAY	mmu00280	1	57	0.67995	0.739006	ENSMUSG00000027875	http://www.genome.jp/kegg-bin/show_pathway?mmu00280/mmu:15360%09red
Long-term depression	KEGG PATHWAY	mmu04730	1	60	0.698287	0.754979	ENSMUSG00000078816	http://www.genome.jp/kegg-bin/show_pathway?mmu04730/mmu:18752%09red
Cell cycle	KEGG PATHWAY	mmu04110	2	123	0.701498	0.757781	ENSMUSG00000047281|ENSMUSG00000073802	http://www.genome.jp/kegg-bin/show_pathway?mmu04110/mmu:12579%09red/mmu:55948%09red
Dopaminergic synapse	KEGG PATHWAY	mmu04728	2	129	0.725681	0.777439	ENSMUSG00000078816|ENSMUSG00000004864	http://www.genome.jp/kegg-bin/show_pathway?mmu04728/mmu:26415%09red/mmu:18752%09red
Long-term potentiation	KEGG PATHWAY	mmu04720	1	65	0.726549	0.777439	ENSMUSG00000078816	http://www.genome.jp/kegg-bin/show_pathway?mmu04720/mmu:18752%09red
Amphetamine addiction	KEGG PATHWAY	mmu05031	1	66	0.731876	0.781638	ENSMUSG00000078816	http://www.genome.jp/kegg-bin/show_pathway?mmu05031/mmu:18752%09red
Serotonergic synapse	KEGG PATHWAY	mmu04726	2	131	0.733366	0.782547	ENSMUSG00000078816|ENSMUSG00000015224	http://www.genome.jp/kegg-bin/show_pathway?mmu04726/mmu:18752%09red/mmu:74519%09red
Spliceosome	KEGG PATHWAY	mmu03040	2	131	0.733366	0.782547	ENSMUSG00000090877|ENSMUSG00000091971	http://www.genome.jp/kegg-bin/show_pathway?mmu03040/mmu:193740%09red/mmu:15511%09red
cAMP signaling pathway	KEGG PATHWAY	mmu04024	3	197	0.748717	0.79643	ENSMUSG00000020901|ENSMUSG00000028525|ENSMUSG00000045613	http://www.genome.jp/kegg-bin/show_pathway?mmu04024/mmu:320207%09red/mmu:243764%09red/mmu:18578%09red
Ubiquitin mediated proteolysis	KEGG PATHWAY	mmu04120	2	137	0.75533	0.802071	ENSMUSG00000053113|ENSMUSG00000022184	http://www.genome.jp/kegg-bin/show_pathway?mmu04120/mmu:106052%09red/mmu:12702%09red
Inositol phosphate metabolism	KEGG PATHWAY	mmu00562	1	71	0.756998	0.803285	ENSMUSG00000037940	http://www.genome.jp/kegg-bin/show_pathway?mmu00562/mmu:234515%09red
Melanoma	KEGG PATHWAY	mmu05218	1	71	0.756998	0.803285	ENSMUSG00000020901	http://www.genome.jp/kegg-bin/show_pathway?mmu05218/mmu:320207%09red
Tight junction	KEGG PATHWAY	mmu04530	2	140	0.765715	0.80973	ENSMUSG00000078816|ENSMUSG00000020469	http://www.genome.jp/kegg-bin/show_pathway?mmu04530/mmu:18752%09red/mmu:17898%09red
Chronic myeloid leukemia	KEGG PATHWAY	mmu05220	1	73	0.766376	0.80973	ENSMUSG00000020901	http://www.genome.jp/kegg-bin/show_pathway?mmu05220/mmu:320207%09red
Arrhythmogenic right ventricular cardiomyopathy (ARVC)	KEGG PATHWAY	mmu05412	1	74	0.770928	0.813138	ENSMUSG00000026768	http://www.genome.jp/kegg-bin/show_pathway?mmu05412/mmu:241226%09red
Cardiac muscle contraction	KEGG PATHWAY	mmu04260	1	74	0.770928	0.813138	ENSMUSG00000061086	http://www.genome.jp/kegg-bin/show_pathway?mmu04260/mmu:17896%09red
Platinum drug resistance	KEGG PATHWAY	mmu01524	1	78	0.788271	0.826733	ENSMUSG00000020901	http://www.genome.jp/kegg-bin/show_pathway?mmu01524/mmu:320207%09red
Bacterial invasion of epithelial cells	KEGG PATHWAY	mmu05100	1	78	0.788271	0.826733	ENSMUSG00000020901	http://www.genome.jp/kegg-bin/show_pathway?mmu05100/mmu:320207%09red
RNA degradation	KEGG PATHWAY	mmu03018	1	79	0.792397	0.829924	ENSMUSG00000054582	http://www.genome.jp/kegg-bin/show_pathway?mmu03018/mmu:381404%09red
Hippo signaling pathway	KEGG PATHWAY	mmu04390	2	154	0.809255	0.84426	ENSMUSG00000022996|ENSMUSG00000022676	http://www.genome.jp/kegg-bin/show_pathway?mmu04390/mmu:22410%09red/mmu:20583%09red
Aldosterone synthesis and secretion	KEGG PATHWAY	mmu04925	1	85	0.815526	0.850079	ENSMUSG00000078816	http://www.genome.jp/kegg-bin/show_pathway?mmu04925/mmu:18752%09red
GABAergic synapse	KEGG PATHWAY	mmu04727	1	87	0.822649	0.856338	ENSMUSG00000078816	http://www.genome.jp/kegg-bin/show_pathway?mmu04727/mmu:18752%09red
Prostate cancer	KEGG PATHWAY	mmu05215	1	89	0.829498	0.861147	ENSMUSG00000020901	http://www.genome.jp/kegg-bin/show_pathway?mmu05215/mmu:320207%09red
mRNA surveillance pathway	KEGG PATHWAY	mmu03015	1	92	0.83928	0.869053	ENSMUSG00000054582	http://www.genome.jp/kegg-bin/show_pathway?mmu03015/mmu:381404%09red
Glycerophospholipid metabolism	KEGG PATHWAY	mmu00564	1	94	0.845488	0.874613	ENSMUSG00000033192	http://www.genome.jp/kegg-bin/show_pathway?mmu00564/mmu:270084%09red
Circadian entrainment	KEGG PATHWAY	mmu04713	1	96	0.851456	0.879599	ENSMUSG00000078816	http://www.genome.jp/kegg-bin/show_pathway?mmu04713/mmu:18752%09red
Glutamatergic synapse	KEGG PATHWAY	mmu04724	1	113	0.893739	0.914336	ENSMUSG00000078816	http://www.genome.jp/kegg-bin/show_pathway?mmu04724/mmu:18752%09red
Alcoholism	KEGG PATHWAY	mmu05034	2	194	0.896546	0.916345	ENSMUSG00000060093|ENSMUSG00000055254	http://www.genome.jp/kegg-bin/show_pathway?mmu05034/mmu:326619%09red/mmu:18212%09red
RNA transport	KEGG PATHWAY	mmu03013	1	166	0.962661	0.971862	ENSMUSG00000054582	http://www.genome.jp/kegg-bin/show_pathway?mmu03013/mmu:381404%09red
Huntington's disease	KEGG PATHWAY	mmu05016	1	184	0.973837	0.981367	ENSMUSG00000006818	http://www.genome.jp/kegg-bin/show_pathway?mmu05016/mmu:20656%09red
Olfactory transduction	KEGG PATHWAY	mmu04740	1	1085	1	1	ENSMUSG00000061039	http://www.genome.jp/kegg-bin/show_pathway?mmu04740/mmu:258783%09red

## Sheet: 7d Vs Sham
Pathway analysis of DETs in the comparison between sham and VILI group on day 7
#Term	Database	ID	Input number	Background number	P-Value	Corrected P-Value	Input	Hyperlink
Cytokine-cytokine receptor interaction	KEGG PATHWAY	mmu04060	50	264	1.40076e-15	5.80415e-14	ENSMUSG00000050395|ENSMUSG00000023905|ENSMUSG00000025856|ENSMUSG00000037035|ENSMUSG00000019122|ENSMUSG00000058755|ENSMUSG00000068105|ENSMUSG00000044337|ENSMUSG00000026068|ENSMUSG00000005824|ENSMUSG00000023078|ENSMUSG00000019966|ENSMUSG00000009185|ENSMUSG00000022015|ENSMUSG00000018920|ENSMUSG00000060548|ENSMUSG00000022074|ENSMUSG00000060509|ENSMUSG00000071713|ENSMUSG00000071714|ENSMUSG00000035678|…	http://www.genome.jp/kegg-bin/show_pathway?mmu04060/mmu:17311%09red/mmu:23832%09red/mmu:22035%09red/mmu:21941%09red/mmu:21943%09red/mmu:16190%09red/mmu:213208%09red/mmu:12983%09red/mmu:20302%09red/mmu:21926%09red/mmu:16194%09red/mmu:12145%09red/mmu:12775%09red/mmu:326623%09red/mmu:72049%09red/mmu:12778%09red/mmu:16542%09red/mmu:20311%09red/mmu:66102%09red/mmu:14102%09red/mmu:18413%09red/mmu:12986…
Osteoclast differentiation	KEGG PATHWAY	mmu04380	34	129	1.64397e-14	6.28312e-13	ENSMUSG00000059498|ENSMUSG00000071076|ENSMUSG00000002111|ENSMUSG00000059089|ENSMUSG00000021457|ENSMUSG00000004508|ENSMUSG00000002699|ENSMUSG00000028111|ENSMUSG00000052837|ENSMUSG00000022015|ENSMUSG00000015947|ENSMUSG00000053113|ENSMUSG00000095028|ENSMUSG00000026656|ENSMUSG00000021025|ENSMUSG00000024401|ENSMUSG00000071715|ENSMUSG00000058818|ENSMUSG00000020623|ENSMUSG00000089942|ENSMUSG00000026480|…	http://www.genome.jp/kegg-bin/show_pathway?mmu04380/mmu:14131%09red/mmu:14130%09red/mmu:11433%09red/mmu:13038%09red/mmu:21943%09red/mmu:18725%09red/mmu:21926%09red/mmu:20375%09red/mmu:26415%09red/mmu:320207%09red/mmu:16818%09red/mmu:18035%09red/mmu:17970%09red/mmu:17972%09red/mmu:668101%09red/mmu:100038909%09red/mmu:16477%09red/mmu:16175%09red/mmu:14728%09red/mmu:14284%09red/mmu:16478%09red/mmu:1…
Staphylococcus aureus infection	KEGG PATHWAY	mmu05150	21	52	2.40279e-12	7.1317e-11	ENSMUSG00000052270|ENSMUSG00000059498|ENSMUSG00000033860|ENSMUSG00000045551|ENSMUSG00000000290|ENSMUSG00000030786|ENSMUSG00000026656|ENSMUSG00000040552|ENSMUSG00000036594|ENSMUSG00000026580|ENSMUSG00000049130|ENSMUSG00000015947|ENSMUSG00000026874|ENSMUSG00000056529|ENSMUSG00000059089|ENSMUSG00000036887|ENSMUSG00000037548|ENSMUSG00000048163|ENSMUSG00000036905|ENSMUSG00000041538|ENSMUSG00000036896	http://www.genome.jp/kegg-bin/show_pathway?mmu05150/mmu:12267%09red/mmu:15139%09red/mmu:16414%09red/mmu:14130%09red/mmu:16409%09red/mmu:99571%09red/mmu:20345%09red/mmu:20344%09red/mmu:12273%09red/mmu:15002%09red/mmu:246256%09red/mmu:14129%09red/mmu:19204%09red/mmu:14960%09red/mmu:14293%09red/mmu:15000%09red/mmu:12260%09red/mmu:14131%09red/mmu:12259%09red/mmu:14289%09red/mmu:12262%09red
Leishmaniasis	KEGG PATHWAY	mmu05140	20	65	4.29989e-10	1.0342e-08	ENSMUSG00000024401|ENSMUSG00000059498|ENSMUSG00000026480|ENSMUSG00000000290|ENSMUSG00000030786|ENSMUSG00000059089|ENSMUSG00000027995|ENSMUSG00000047945|ENSMUSG00000021250|ENSMUSG00000036594|ENSMUSG00000004864|ENSMUSG00000021025|ENSMUSG00000015947|ENSMUSG00000015950|ENSMUSG00000037548|ENSMUSG00000027399|ENSMUSG00000027398|ENSMUSG00000041538|ENSMUSG00000020826|ENSMUSG00000071715	http://www.genome.jp/kegg-bin/show_pathway?mmu05140/mmu:14281%09red/mmu:15000%09red/mmu:26415%09red/mmu:16414%09red/mmu:17969%09red/mmu:16409%09red/mmu:18035%09red/mmu:15002%09red/mmu:17972%09red/mmu:246256%09red/mmu:14129%09red/mmu:17970%09red/mmu:14960%09red/mmu:18126%09red/mmu:16176%09red/mmu:24088%09red/mmu:14131%09red/mmu:17357%09red/mmu:21926%09red/mmu:16175%09red
TNF signaling pathway	KEGG PATHWAY	mmu04668	24	110	3.08137e-09	6.55184e-08	ENSMUSG00000017737|ENSMUSG00000021367|ENSMUSG00000056501|ENSMUSG00000053175|ENSMUSG00000043613|ENSMUSG00000024235|ENSMUSG00000053113|ENSMUSG00000021025|ENSMUSG00000024401|ENSMUSG00000020623|ENSMUSG00000021250|ENSMUSG00000026582|ENSMUSG00000000957|ENSMUSG00000027398|ENSMUSG00000035042|ENSMUSG00000020901|ENSMUSG00000052837|ENSMUSG00000029380|ENSMUSG00000004864|ENSMUSG00000035385|ENSMUSG00000032000|…	http://www.genome.jp/kegg-bin/show_pathway?mmu04668/mmu:21929%09red/mmu:21926%09red/mmu:20339%09red/mmu:26415%09red/mmu:26410%09red/mmu:13614%09red/mmu:320207%09red/mmu:18035%09red/mmu:17387%09red/mmu:14102%09red/mmu:20304%09red/mmu:16477%09red/mmu:14825%09red/mmu:20296%09red/mmu:12051%09red/mmu:14281%09red/mmu:21938%09red/mmu:11796%09red/mmu:12608%09red/mmu:12702%09red/mmu:26399%09red/mmu:17392%…
Rheumatoid arthritis	KEGG PATHWAY	mmu05323	20	81	1.06042e-08	2.11832e-07	ENSMUSG00000024401|ENSMUSG00000000982|ENSMUSG00000075122|ENSMUSG00000000290|ENSMUSG00000035385|ENSMUSG00000043613|ENSMUSG00000027995|ENSMUSG00000021250|ENSMUSG00000036594|ENSMUSG00000024121|ENSMUSG00000022015|ENSMUSG00000021477|ENSMUSG00000035042|ENSMUSG00000037548|ENSMUSG00000027399|ENSMUSG00000027398|ENSMUSG00000028111|ENSMUSG00000029371|ENSMUSG00000041538|ENSMUSG00000001348	http://www.genome.jp/kegg-bin/show_pathway?mmu05323/mmu:14281%09red/mmu:16414%09red/mmu:16175%09red/mmu:11433%09red/mmu:13038%09red/mmu:17392%09red/mmu:15002%09red/mmu:15000%09red/mmu:11984%09red/mmu:13039%09red/mmu:14960%09red/mmu:20311%09red/mmu:21943%09red/mmu:16176%09red/mmu:24088%09red/mmu:20296%09red/mmu:12519%09red/mmu:20302%09red/mmu:21926%09red/mmu:20304%09red
Phagosome	KEGG PATHWAY	mmu04145	29	173	1.45257e-08	2.84731e-07	ENSMUSG00000021477|ENSMUSG00000067235|ENSMUSG00000054580|ENSMUSG00000059089|ENSMUSG00000059498|ENSMUSG00000043091|ENSMUSG00000025044|ENSMUSG00000037548|ENSMUSG00000053835|ENSMUSG00000015947|ENSMUSG00000037936|ENSMUSG00000026656|ENSMUSG00000038642|ENSMUSG00000026390|ENSMUSG00000071715|ENSMUSG00000026480|ENSMUSG00000030786|ENSMUSG00000051498|ENSMUSG00000024121|ENSMUSG00000062591|ENSMUSG00000015533|…	http://www.genome.jp/kegg-bin/show_pathway?mmu04145/mmu:17167%09red/mmu:14131%09red/mmu:22153%09red/mmu:16409%09red/mmu:20288%09red/mmu:16398%09red/mmu:246256%09red/mmu:21825%09red/mmu:14130%09red/mmu:12475%09red/mmu:17970%09red/mmu:13039%09red/mmu:17972%09red/mmu:13040%09red/mmu:22146%09red/mmu:16414%09red/mmu:21899%09red/mmu:11984%09red/mmu:14960%09red/mmu:24088%09red/mmu:14129%09red/mmu:67951%…
Tuberculosis	KEGG PATHWAY	mmu05152	27	176	2.23751e-07	3.57403e-06	ENSMUSG00000059498|ENSMUSG00000054580|ENSMUSG00000026656|ENSMUSG00000028680|ENSMUSG00000021457|ENSMUSG00000056501|ENSMUSG00000020826|ENSMUSG00000058715|ENSMUSG00000037548|ENSMUSG00000015947|ENSMUSG00000059089|ENSMUSG00000038642|ENSMUSG00000030142|ENSMUSG00000030786|ENSMUSG00000051498|ENSMUSG00000024121|ENSMUSG00000024401|ENSMUSG00000027399|ENSMUSG00000027398|ENSMUSG00000061878|ENSMUSG00000007891|…	http://www.genome.jp/kegg-bin/show_pathway?mmu05152/mmu:13033%09red/mmu:14131%09red/mmu:14130%09red/mmu:16409%09red/mmu:12795%09red/mmu:18779%09red/mmu:21926%09red/mmu:246256%09red/mmu:14129%09red/mmu:26415%09red/mmu:12475%09red/mmu:13040%09red/mmu:56619%09red/mmu:14127%09red/mmu:16414%09red/mmu:21899%09red/mmu:11984%09red/mmu:14960%09red/mmu:24088%09red/mmu:20963%09red/mmu:20698%09red/mmu:12608%…
Hematopoietic cell lineage	KEGG PATHWAY	mmu04640	18	87	5.5778e-07	8.35173e-06	ENSMUSG00000027947|ENSMUSG00000026616|ENSMUSG00000053044|ENSMUSG00000030786|ENSMUSG00000004609|ENSMUSG00000030724|ENSMUSG00000030748|ENSMUSG00000042284|ENSMUSG00000051439|ENSMUSG00000015947|ENSMUSG00000019966|ENSMUSG00000024401|ENSMUSG00000027399|ENSMUSG00000027398|ENSMUSG00000028859|ENSMUSG00000015533|ENSMUSG00000024673|ENSMUSG00000026073	http://www.genome.jp/kegg-bin/show_pathway?mmu04640/mmu:12986%09red/mmu:12482%09red/mmu:12478%09red/mmu:16178%09red/mmu:16409%09red/mmu:109700%09red/mmu:17311%09red/mmu:12489%09red/mmu:12902%09red/mmu:12526%09red/mmu:16398%09red/mmu:16176%09red/mmu:16175%09red/mmu:16190%09red/mmu:14129%09red/mmu:21926%09red/mmu:16194%09red/mmu:12475%09red
Transcriptional misregulation in cancer	KEGG PATHWAY	mmu05202	26	174	5.8401e-07	8.68327e-06	ENSMUSG00000002111|ENSMUSG00000025856|ENSMUSG00000066687|ENSMUSG00000056501|ENSMUSG00000028341|ENSMUSG00000001281|ENSMUSG00000059436|ENSMUSG00000022346|ENSMUSG00000043613|ENSMUSG00000031538|ENSMUSG00000015947|ENSMUSG00000069273|ENSMUSG00000005583|ENSMUSG00000035356|ENSMUSG00000014030|ENSMUSG00000020053|ENSMUSG00000030786|ENSMUSG00000020427|ENSMUSG00000030717|ENSMUSG00000051439|ENSMUSG00000017737|…	http://www.genome.jp/kegg-bin/show_pathway?mmu05202/mmu:12048%09red/mmu:16409%09red/mmu:16421%09red/mmu:17187%09red/mmu:319151%09red/mmu:12775%09red/mmu:20375%09red/mmu:12575%09red/mmu:235320%09red/mmu:18507%09red/mmu:12475%09red/mmu:17260%09red/mmu:16009%09red/mmu:80859%09red/mmu:16000%09red/mmu:14129%09red/mmu:18590%09red/mmu:11796%09red/mmu:12608%09red/mmu:56312%09red/mmu:17392%09red/mmu:17395…
PI3K-Akt signaling pathway	KEGG PATHWAY	mmu04151	39	341	6.10115e-07	9.03835e-06	ENSMUSG00000032766|ENSMUSG00000048756|ENSMUSG00000028364|ENSMUSG00000026840|ENSMUSG00000021457|ENSMUSG00000029304|ENSMUSG00000058755|ENSMUSG00000001281|ENSMUSG00000031565|ENSMUSG00000022346|ENSMUSG00000029120|ENSMUSG00000030724|ENSMUSG00000042284|ENSMUSG00000006445|ENSMUSG00000042453|ENSMUSG00000019966|ENSMUSG00000005320|ENSMUSG00000023034|ENSMUSG00000020053|ENSMUSG00000027947|ENSMUSG00000055737|…	http://www.genome.jp/kegg-bin/show_pathway?mmu04151/mmu:15370%09red/mmu:12048%09red/mmu:12575%09red/mmu:17311%09red/mmu:16542%09red/mmu:16404%09red/mmu:21825%09red/mmu:16398%09red/mmu:13685%09red/mmu:269643%09red/mmu:21923%09red/mmu:19699%09red/mmu:13836%09red/mmu:16194%09red/mmu:14184%09red/mmu:12478%09red/mmu:109700%09red/mmu:81877%09red/mmu:66066%09red/mmu:320207%09red/mmu:16421%09red/mmu:1460…
B cell receptor signaling pathway	KEGG PATHWAY	mmu04662	16	72	1.04125e-06	1.47967e-05	ENSMUSG00000058818|ENSMUSG00000025491|ENSMUSG00000026616|ENSMUSG00000026288|ENSMUSG00000026656|ENSMUSG00000021025|ENSMUSG00000030724|ENSMUSG00000021457|ENSMUSG00000020901|ENSMUSG00000036526|ENSMUSG00000033220|ENSMUSG00000040592|ENSMUSG00000071042|ENSMUSG00000003379|ENSMUSG00000021250|ENSMUSG00000034116	http://www.genome.jp/kegg-bin/show_pathway?mmu04662/mmu:22324%09red/mmu:12478%09red/mmu:108723%09red/mmu:14130%09red/mmu:19354%09red/mmu:320207%09red/mmu:12902%09red/mmu:15985%09red/mmu:14281%09red/mmu:18035%09red/mmu:18733%09red/mmu:68713%09red/mmu:16331%09red/mmu:12518%09red/mmu:20963%09red/mmu:240168%09red
Toll-like receptor signaling pathway	KEGG PATHWAY	mmu04620	19	102	1.10078e-06	1.55371e-05	ENSMUSG00000035042|ENSMUSG00000000982|ENSMUSG00000018930|ENSMUSG00000020901|ENSMUSG00000027995|ENSMUSG00000051498|ENSMUSG00000075122|ENSMUSG00000042349|ENSMUSG00000029304|ENSMUSG00000051439|ENSMUSG00000024235|ENSMUSG00000020623|ENSMUSG00000044583|ENSMUSG00000024401|ENSMUSG00000021025|ENSMUSG00000027398|ENSMUSG00000028111|ENSMUSG00000021250|ENSMUSG00000004864	http://www.genome.jp/kegg-bin/show_pathway?mmu04620/mmu:26415%09red/mmu:21899%09red/mmu:26410%09red/mmu:13038%09red/mmu:320207%09red/mmu:56489%09red/mmu:14281%09red/mmu:18035%09red/mmu:20303%09red/mmu:20302%09red/mmu:16176%09red/mmu:24088%09red/mmu:26399%09red/mmu:12519%09red/mmu:20750%09red/mmu:12475%09red/mmu:21926%09red/mmu:170743%09red/mmu:20304%09red
Pertussis	KEGG PATHWAY	mmu05133	16	75	1.65866e-06	2.20715e-05	ENSMUSG00000020826|ENSMUSG00000000290|ENSMUSG00000030786|ENSMUSG00000021250|ENSMUSG00000030793|ENSMUSG00000032691|ENSMUSG00000004864|ENSMUSG00000027399|ENSMUSG00000026874|ENSMUSG00000024401|ENSMUSG00000036887|ENSMUSG00000027398|ENSMUSG00000036905|ENSMUSG00000029371|ENSMUSG00000051439|ENSMUSG00000036896	http://www.genome.jp/kegg-bin/show_pathway?mmu05133/mmu:26415%09red/mmu:15139%09red/mmu:16414%09red/mmu:16409%09red/mmu:216799%09red/mmu:14281%09red/mmu:12475%09red/mmu:20311%09red/mmu:18126%09red/mmu:16176%09red/mmu:16175%09red/mmu:12260%09red/mmu:12259%09red/mmu:21926%09red/mmu:66824%09red/mmu:12262%09red
MAPK signaling pathway	KEGG PATHWAY	mmu04010	31	254	2.56059e-06	3.28211e-05	ENSMUSG00000033220|ENSMUSG00000071076|ENSMUSG00000021453|ENSMUSG00000025856|ENSMUSG00000016528|ENSMUSG00000031565|ENSMUSG00000059436|ENSMUSG00000022346|ENSMUSG00000028862|ENSMUSG00000024190|ENSMUSG00000024235|ENSMUSG00000023034|ENSMUSG00000004951|ENSMUSG00000005320|ENSMUSG00000024401|ENSMUSG00000005583|ENSMUSG00000021708|ENSMUSG00000020623|ENSMUSG00000021250|ENSMUSG00000022416|ENSMUSG00000027399|…	http://www.genome.jp/kegg-bin/show_pathway?mmu04010/mmu:15370%09red/mmu:17164%09red/mmu:17187%09red/mmu:19419%09red/mmu:19418%09red/mmu:21926%09red/mmu:14184%09red/mmu:14186%09red/mmu:18212%09red/mmu:26410%09red/mmu:240168%09red/mmu:12475%09red/mmu:239556%09red/mmu:15507%09red/mmu:23882%09red/mmu:14102%09red/mmu:17260%09red/mmu:26415%09red/mmu:14281%09red/mmu:18590%09red/mmu:16478%09red/mmu:19252…
Complement and coagulation cascades	KEGG PATHWAY	mmu04610	17	89	2.97016e-06	3.71871e-05	ENSMUSG00000028128|ENSMUSG00000026616|ENSMUSG00000033860|ENSMUSG00000000290|ENSMUSG00000030786|ENSMUSG00000039109|ENSMUSG00000046223|ENSMUSG00000031538|ENSMUSG00000049130|ENSMUSG00000062345|ENSMUSG00000026874|ENSMUSG00000031444|ENSMUSG00000036887|ENSMUSG00000040552|ENSMUSG00000036905|ENSMUSG00000037411|ENSMUSG00000036896	http://www.genome.jp/kegg-bin/show_pathway?mmu04610/mmu:14058%09red/mmu:15139%09red/mmu:16414%09red/mmu:16409%09red/mmu:99571%09red/mmu:14066%09red/mmu:74145%09red/mmu:12902%09red/mmu:12267%09red/mmu:18787%09red/mmu:12273%09red/mmu:18791%09red/mmu:12262%09red/mmu:18793%09red/mmu:12260%09red/mmu:12259%09red/mmu:18788%09red
Chemokine signaling pathway	KEGG PATHWAY	mmu04062	26	194	3.58316e-06	4.36299e-05	ENSMUSG00000032766|ENSMUSG00000033220|ENSMUSG00000019122|ENSMUSG00000023078|ENSMUSG00000018920|ENSMUSG00000021025|ENSMUSG00000048756|ENSMUSG00000034116|ENSMUSG00000025804|ENSMUSG00000060216|ENSMUSG00000060509|ENSMUSG00000026180|ENSMUSG00000029371|ENSMUSG00000009185|ENSMUSG00000029373|ENSMUSG00000035042|ENSMUSG00000000982|ENSMUSG00000047880|ENSMUSG00000020901|ENSMUSG00000004040|ENSMUSG00000029380|…	http://www.genome.jp/kegg-bin/show_pathway?mmu04062/mmu:23832%09red/mmu:12145%09red/mmu:12775%09red/mmu:66066%09red/mmu:320207%09red/mmu:18035%09red/mmu:20311%09red/mmu:66102%09red/mmu:20848%09red/mmu:20304%09red/mmu:22324%09red/mmu:17969%09red/mmu:14825%09red/mmu:20296%09red/mmu:12765%09red/mmu:56744%09red/mmu:14191%09red/mmu:216869%09red/mmu:19354%09red/mmu:12768%09red/mmu:20303%09red/mmu:20302…
Chagas disease (American trypanosomiasis)	KEGG PATHWAY	mmu05142	18	103	4.6289e-06	5.51122e-05	ENSMUSG00000035042|ENSMUSG00000000982|ENSMUSG00000035385|ENSMUSG00000029120|ENSMUSG00000027995|ENSMUSG00000051498|ENSMUSG00000021250|ENSMUSG00000021025|ENSMUSG00000004864|ENSMUSG00000020901|ENSMUSG00000020826|ENSMUSG00000036896|ENSMUSG00000024401|ENSMUSG00000036887|ENSMUSG00000027398|ENSMUSG00000036905|ENSMUSG00000037411|ENSMUSG00000024778	http://www.genome.jp/kegg-bin/show_pathway?mmu05142/mmu:26415%09red/mmu:320207%09red/mmu:20296%09red/mmu:21899%09red/mmu:269643%09red/mmu:20304%09red/mmu:18035%09red/mmu:14281%09red/mmu:18787%09red/mmu:20302%09red/mmu:18126%09red/mmu:16176%09red/mmu:24088%09red/mmu:12260%09red/mmu:12259%09red/mmu:21926%09red/mmu:14102%09red/mmu:12262%09red
Apoptosis	KEGG PATHWAY	mmu04210	21	138	5.38192e-06	6.33568e-05	ENSMUSG00000024401|ENSMUSG00000007891|ENSMUSG00000043091|ENSMUSG00000021477|ENSMUSG00000007659|ENSMUSG00000020901|ENSMUSG00000071714|ENSMUSG00000024521|ENSMUSG00000021453|ENSMUSG00000021250|ENSMUSG00000037202|ENSMUSG00000032000|ENSMUSG00000039304|ENSMUSG00000021939|ENSMUSG00000022074|ENSMUSG00000021025|ENSMUSG00000038642|ENSMUSG00000032359|ENSMUSG00000028111|ENSMUSG00000071713|ENSMUSG00000024778	http://www.genome.jp/kegg-bin/show_pathway?mmu04210/mmu:11796%09red/mmu:13030%09red/mmu:13033%09red/mmu:12048%09red/mmu:12983%09red/mmu:13036%09red/mmu:13039%09red/mmu:13038%09red/mmu:320207%09red/mmu:22035%09red/mmu:18035%09red/mmu:14281%09red/mmu:12984%09red/mmu:22146%09red/mmu:13040%09red/mmu:23882%09red/mmu:58801%09red/mmu:21933%09red/mmu:21926%09red/mmu:14102%09red/mmu:18646%09red
NOD-like receptor signaling pathway	KEGG PATHWAY	mmu04621	13	57	8.29573e-06	9.30767e-05	ENSMUSG00000035042|ENSMUSG00000035385|ENSMUSG00000029380|ENSMUSG00000030793|ENSMUSG00000032691|ENSMUSG00000004864|ENSMUSG00000032000|ENSMUSG00000032322|ENSMUSG00000022534|ENSMUSG00000024401|ENSMUSG00000021025|ENSMUSG00000027398|ENSMUSG00000019850	http://www.genome.jp/kegg-bin/show_pathway?mmu04621/mmu:11796%09red/mmu:26415%09red/mmu:14825%09red/mmu:19200%09red/mmu:216799%09red/mmu:18035%09red/mmu:21929%09red/mmu:16176%09red/mmu:20296%09red/mmu:66824%09red/mmu:21926%09red/mmu:54483%09red/mmu:20304%09red
HIF-1 signaling pathway	KEGG PATHWAY	mmu04066	17	106	2.27355e-05	0.000235806	ENSMUSG00000020053|ENSMUSG00000025877|ENSMUSG00000027947|ENSMUSG00000020901|ENSMUSG00000005413|ENSMUSG00000004040|ENSMUSG00000023067|ENSMUSG00000031490|ENSMUSG00000063524|ENSMUSG00000021367|ENSMUSG00000000628|ENSMUSG00000057666|ENSMUSG00000035105|ENSMUSG00000028645|ENSMUSG00000037411|ENSMUSG00000020826|ENSMUSG00000026773	http://www.genome.jp/kegg-bin/show_pathway?mmu04066/mmu:112407%09red/mmu:212032%09red/mmu:20525%09red/mmu:12575%09red/mmu:13806%09red/mmu:15368%09red/mmu:13614%09red/mmu:16000%09red/mmu:15277%09red/mmu:18787%09red/mmu:13685%09red/mmu:18126%09red/mmu:20848%09red/mmu:170768%09red/mmu:320207%09red/mmu:14433%09red/mmu:16194%09red
Graft-versus-host disease	KEGG PATHWAY	mmu05332	12	57	3.65042e-05	0.000359037	ENSMUSG00000067235|ENSMUSG00000030165|ENSMUSG00000037548|ENSMUSG00000053835|ENSMUSG00000036594|ENSMUSG00000037202|ENSMUSG00000024401|ENSMUSG00000027399|ENSMUSG00000027398|ENSMUSG00000075122|ENSMUSG00000041538|ENSMUSG00000024778	http://www.genome.jp/kegg-bin/show_pathway?mmu05332/mmu:16643%09red/mmu:15007%09red/mmu:15002%09red/mmu:15000%09red/mmu:15042%09red/mmu:14960%09red/mmu:16176%09red/mmu:16175%09red/mmu:12519%09red/mmu:21926%09red/mmu:14102%09red/mmu:18646%09red
Inflammatory bowel disease (IBD)	KEGG PATHWAY	mmu05321	12	58	4.23405e-05	0.000407813	ENSMUSG00000001444|ENSMUSG00000037548|ENSMUSG00000004040|ENSMUSG00000036594|ENSMUSG00000041538|ENSMUSG00000026068|ENSMUSG00000030748|ENSMUSG00000041872|ENSMUSG00000024401|ENSMUSG00000027399|ENSMUSG00000027398|ENSMUSG00000027995	http://www.genome.jp/kegg-bin/show_pathway?mmu05321/mmu:57765%09red/mmu:24088%09red/mmu:15002%09red/mmu:15000%09red/mmu:257630%09red/mmu:14960%09red/mmu:16176%09red/mmu:20848%09red/mmu:16174%09red/mmu:16190%09red/mmu:21926%09red/mmu:16175%09red
Natural killer cell mediated cytotoxicity	KEGG PATHWAY	mmu04650	17	115	5.69736e-05	0.00052868	ENSMUSG00000037202|ENSMUSG00000034116|ENSMUSG00000030165|ENSMUSG00000020901|ENSMUSG00000059089|ENSMUSG00000000409|ENSMUSG00000000290|ENSMUSG00000021457|ENSMUSG00000054520|ENSMUSG00000033220|ENSMUSG00000030579|ENSMUSG00000039304|ENSMUSG00000022074|ENSMUSG00000002699|ENSMUSG00000024401|ENSMUSG00000058715|ENSMUSG00000024778	http://www.genome.jp/kegg-bin/show_pathway?mmu04650/mmu:14127%09red/mmu:16643%09red/mmu:16414%09red/mmu:22324%09red/mmu:22035%09red/mmu:19354%09red/mmu:320207%09red/mmu:16818%09red/mmu:246256%09red/mmu:16822%09red/mmu:21926%09red/mmu:18646%09red/mmu:20963%09red/mmu:22177%09red/mmu:24055%09red/mmu:21933%09red/mmu:14102%09red
Proteoglycans in cancer	KEGG PATHWAY	mmu05205	24	206	6.54227e-05	0.00059327	ENSMUSG00000021477|ENSMUSG00000022831|ENSMUSG00000025351|ENSMUSG00000031565|ENSMUSG00000022996|ENSMUSG00000022346|ENSMUSG00000046223|ENSMUSG00000018166|ENSMUSG00000024401|ENSMUSG00000017009|ENSMUSG00000020053|ENSMUSG00000052397|ENSMUSG00000050288|ENSMUSG00000015533|ENSMUSG00000062960|ENSMUSG00000040152|ENSMUSG00000020901|ENSMUSG00000004040|ENSMUSG00000017737|ENSMUSG00000023067|ENSMUSG00000004864|…	http://www.genome.jp/kegg-bin/show_pathway?mmu05205/mmu:22350%09red/mmu:12575%09red/mmu:16542%09red/mmu:16398%09red/mmu:12512%09red/mmu:21825%09red/mmu:20971%09red/mmu:21926%09red/mmu:13867%09red/mmu:26415%09red/mmu:14182%09red/mmu:320207%09red/mmu:13982%09red/mmu:13039%09red/mmu:20848%09red/mmu:14102%09red/mmu:16000%09red/mmu:24088%09red/mmu:57265%09red/mmu:22410%09red/mmu:17395%09red/mmu:15163%…
Type I diabetes mellitus	KEGG PATHWAY	mmu04940	12	62	7.45074e-05	0.000664847	ENSMUSG00000067235|ENSMUSG00000056553|ENSMUSG00000037548|ENSMUSG00000053835|ENSMUSG00000036594|ENSMUSG00000037202|ENSMUSG00000024401|ENSMUSG00000027399|ENSMUSG00000027398|ENSMUSG00000075122|ENSMUSG00000041538|ENSMUSG00000024778	http://www.genome.jp/kegg-bin/show_pathway?mmu04940/mmu:15007%09red/mmu:19276%09red/mmu:15002%09red/mmu:15000%09red/mmu:15042%09red/mmu:14960%09red/mmu:16176%09red/mmu:16175%09red/mmu:12519%09red/mmu:21926%09red/mmu:14102%09red/mmu:18646%09red
Influenza A	KEGG PATHWAY	mmu05164	21	170	8.7064e-05	0.000767888	ENSMUSG00000035042|ENSMUSG00000024401|ENSMUSG00000020623|ENSMUSG00000035385|ENSMUSG00000030530|ENSMUSG00000020901|ENSMUSG00000037548|ENSMUSG00000036594|ENSMUSG00000042349|ENSMUSG00000032691|ENSMUSG00000004864|ENSMUSG00000021025|ENSMUSG00000030793|ENSMUSG00000053113|ENSMUSG00000044583|ENSMUSG00000039304|ENSMUSG00000022074|ENSMUSG00000027399|ENSMUSG00000027398|ENSMUSG00000041538|ENSMUSG00000024778	http://www.genome.jp/kegg-bin/show_pathway?mmu05164/mmu:15000%09red/mmu:12702%09red/mmu:66824%09red/mmu:20296%09red/mmu:26399%09red/mmu:320207%09red/mmu:15002%09red/mmu:56489%09red/mmu:22035%09red/mmu:18035%09red/mmu:14960%09red/mmu:16176%09red/mmu:16175%09red/mmu:216799%09red/mmu:20304%09red/mmu:21933%09red/mmu:26415%09red/mmu:21926%09red/mmu:170743%09red/mmu:14102%09red/mmu:18550%09red
p53 signaling pathway	KEGG PATHWAY	mmu04115	12	68	0.000161255	0.00133107	ENSMUSG00000020053|ENSMUSG00000038332|ENSMUSG00000028893|ENSMUSG00000040152|ENSMUSG00000037411|ENSMUSG00000021453|ENSMUSG00000023067|ENSMUSG00000020427|ENSMUSG00000024778|ENSMUSG00000047281|ENSMUSG00000024521|ENSMUSG00000019851	http://www.genome.jp/kegg-bin/show_pathway?mmu04115/mmu:16009%09red/mmu:230784%09red/mmu:12575%09red/mmu:16000%09red/mmu:58801%09red/mmu:18787%09red/mmu:64058%09red/mmu:55948%09red/mmu:21825%09red/mmu:140742%09red/mmu:14102%09red/mmu:23882%09red
FoxO signaling pathway	KEGG PATHWAY	mmu04068	17	134	0.000299495	0.00230402	ENSMUSG00000020053|ENSMUSG00000048756|ENSMUSG00000045092|ENSMUSG00000020901|ENSMUSG00000023067|ENSMUSG00000004040|ENSMUSG00000021453|ENSMUSG00000019970|ENSMUSG00000073802|ENSMUSG00000028680|ENSMUSG00000004864|ENSMUSG00000078566|ENSMUSG00000096472|ENSMUSG00000039304|ENSMUSG00000038894|ENSMUSG00000055148|ENSMUSG00000022358	http://www.genome.jp/kegg-bin/show_pathway?mmu04068/mmu:26415%09red/mmu:16000%09red/mmu:16598%09red/mmu:12575%09red/mmu:13609%09red/mmu:20393%09red/mmu:12579%09red/mmu:12581%09red/mmu:22035%09red/mmu:12795%09red/mmu:384783%09red/mmu:23882%09red/mmu:20848%09red/mmu:12176%09red/mmu:67731%09red/mmu:320207%09red/mmu:56484%09red
Cell adhesion molecules (CAMs)	KEGG PATHWAY	mmu04514	19	161	0.000313602	0.00239115	ENSMUSG00000070473|ENSMUSG00000067235|ENSMUSG00000047230|ENSMUSG00000053044|ENSMUSG00000026582|ENSMUSG00000048163|ENSMUSG00000030786|ENSMUSG00000000290|ENSMUSG00000053835|ENSMUSG00000026768|ENSMUSG00000036594|ENSMUSG00000017167|ENSMUSG00000026580|ENSMUSG00000047501|ENSMUSG00000037548|ENSMUSG00000001281|ENSMUSG00000075122|ENSMUSG00000041538|ENSMUSG00000017009	http://www.genome.jp/kegg-bin/show_pathway?mmu04514/mmu:12739%09red/mmu:20339%09red/mmu:16414%09red/mmu:16409%09red/mmu:12738%09red/mmu:16421%09red/mmu:20344%09red/mmu:241226%09red/mmu:15002%09red/mmu:15000%09red/mmu:53321%09red/mmu:20345%09red/mmu:14960%09red/mmu:15042%09red/mmu:15007%09red/mmu:12519%09red/mmu:20971%09red/mmu:12740%09red/mmu:12526%09red
NF-kappa B signaling pathway	KEGG PATHWAY	mmu04064	14	99	0.000376037	0.00279275	ENSMUSG00000024401|ENSMUSG00000018930|ENSMUSG00000000409|ENSMUSG00000051439|ENSMUSG00000021457|ENSMUSG00000022015|ENSMUSG00000021025|ENSMUSG00000036526|ENSMUSG00000032000|ENSMUSG00000007659|ENSMUSG00000068105|ENSMUSG00000027398|ENSMUSG00000005824|ENSMUSG00000019850	http://www.genome.jp/kegg-bin/show_pathway?mmu04064/mmu:11796%09red/mmu:12048%09red/mmu:108723%09red/mmu:50930%09red/mmu:72049%09red/mmu:16818%09red/mmu:18035%09red/mmu:21943%09red/mmu:20303%09red/mmu:21929%09red/mmu:16176%09red/mmu:20963%09red/mmu:12475%09red/mmu:21926%09red
Pathways in cancer	KEGG PATHWAY	mmu05200	34	393	0.000504942	0.0035969	ENSMUSG00000032766|ENSMUSG00000033220|ENSMUSG00000002111|ENSMUSG00000023067|ENSMUSG00000026840|ENSMUSG00000066687|ENSMUSG00000020826|ENSMUSG00000031565|ENSMUSG00000022996|ENSMUSG00000028645|ENSMUSG00000022346|ENSMUSG00000035105|ENSMUSG00000046532|ENSMUSG00000021025|ENSMUSG00000059436|ENSMUSG00000019966|ENSMUSG00000020053|ENSMUSG00000021250|ENSMUSG00000064325|ENSMUSG00000050288|ENSMUSG00000004791|…	http://www.genome.jp/kegg-bin/show_pathway?mmu05200/mmu:17311%09red/mmu:12048%09red/mmu:15245%09red/mmu:12575%09red/mmu:12579%09red/mmu:16398%09red/mmu:17187%09red/mmu:19419%09red/mmu:240168%09red/mmu:14184%09red/mmu:20375%09red/mmu:20525%09red/mmu:235320%09red/mmu:66066%09red/mmu:320207%09red/mmu:18035%09red/mmu:23928%09red/mmu:20848%09red/mmu:14102%09red/mmu:12986%09red/mmu:112407%09red/mmu:118…
Fc epsilon RI signaling pathway	KEGG PATHWAY	mmu04664	11	67	0.000516238	0.00366489	ENSMUSG00000020623|ENSMUSG00000034116|ENSMUSG00000026288|ENSMUSG00000021457|ENSMUSG00000004864|ENSMUSG00000020901|ENSMUSG00000004508|ENSMUSG00000033220|ENSMUSG00000002699|ENSMUSG00000024401|ENSMUSG00000058715	http://www.genome.jp/kegg-bin/show_pathway?mmu04664/mmu:14127%09red/mmu:26415%09red/mmu:22324%09red/mmu:26399%09red/mmu:19354%09red/mmu:320207%09red/mmu:16822%09red/mmu:16331%09red/mmu:20963%09red/mmu:14389%09red/mmu:21926%09red
Malaria	KEGG PATHWAY	mmu05144	9	47	0.000623127	0.00427857	ENSMUSG00000073940|ENSMUSG00000040152|ENSMUSG00000000290|ENSMUSG00000035385|ENSMUSG00000027995|ENSMUSG00000026582|ENSMUSG00000026580|ENSMUSG00000024401|ENSMUSG00000027398	http://www.genome.jp/kegg-bin/show_pathway?mmu05144/mmu:20339%09red/mmu:16414%09red/mmu:20344%09red/mmu:16176%09red/mmu:24088%09red/mmu:20296%09red/mmu:21825%09red/mmu:21926%09red/mmu:101488143%09red
Legionellosis	KEGG PATHWAY	mmu05134	10	58	0.000654717	0.0044589	ENSMUSG00000000290|ENSMUSG00000030786|ENSMUSG00000078566|ENSMUSG00000027995|ENSMUSG00000029380|ENSMUSG00000030793|ENSMUSG00000051439|ENSMUSG00000024401|ENSMUSG00000021025|ENSMUSG00000027398	http://www.genome.jp/kegg-bin/show_pathway?mmu05134/mmu:16414%09red/mmu:16409%09red/mmu:14825%09red/mmu:18035%09red/mmu:12475%09red/mmu:16176%09red/mmu:24088%09red/mmu:12176%09red/mmu:21926%09red/mmu:66824%09red
Rap1 signaling pathway	KEGG PATHWAY	mmu04015	22	216	0.000704708	0.00476062	ENSMUSG00000025856|ENSMUSG00000002699|ENSMUSG00000031565|ENSMUSG00000062960|ENSMUSG00000019966|ENSMUSG00000042745|ENSMUSG00000005320|ENSMUSG00000020053|ENSMUSG00000020623|ENSMUSG00000030786|ENSMUSG00000004791|ENSMUSG00000006445|ENSMUSG00000044641|ENSMUSG00000040152|ENSMUSG00000045551|ENSMUSG00000000290|ENSMUSG00000020901|ENSMUSG00000054252|ENSMUSG00000004864|ENSMUSG00000033220|ENSMUSG00000071042|…	http://www.genome.jp/kegg-bin/show_pathway?mmu04015/mmu:17311%09red/mmu:14293%09red/mmu:16409%09red/mmu:16542%09red/mmu:21825%09red/mmu:13836%09red/mmu:240168%09red/mmu:14184%09red/mmu:14186%09red/mmu:14182%09red/mmu:320207%09red/mmu:58220%09red/mmu:23880%09red/mmu:16414%09red/mmu:16000%09red/mmu:26415%09red/mmu:18654%09red/mmu:18590%09red/mmu:15901%09red/mmu:26399%09red/mmu:19354%09red/mmu:16822…
HTLV-I infection	KEGG PATHWAY	mmu05166	26	277	0.0007532	0.00505151	ENSMUSG00000067235|ENSMUSG00000002111|ENSMUSG00000025856|ENSMUSG00000068105|ENSMUSG00000022996|ENSMUSG00000028645|ENSMUSG00000022346|ENSMUSG00000037548|ENSMUSG00000053835|ENSMUSG00000073802|ENSMUSG00000021025|ENSMUSG00000024401|ENSMUSG00000025810|ENSMUSG00000028211|ENSMUSG00000021250|ENSMUSG00000050288|ENSMUSG00000000290|ENSMUSG00000020901|ENSMUSG00000000409|ENSMUSG00000023067|ENSMUSG00000036594|…	http://www.genome.jp/kegg-bin/show_pathway?mmu05166/mmu:12048%09red/mmu:18186%09red/mmu:12579%09red/mmu:22695%09red/mmu:72049%09red/mmu:20375%09red/mmu:20525%09red/mmu:12575%09red/mmu:21926%09red/mmu:320207%09red/mmu:16818%09red/mmu:18035%09red/mmu:16414%09red/mmu:14281%09red/mmu:14960%09red/mmu:18590%09red/mmu:57265%09red/mmu:22410%09red/mmu:15007%09red/mmu:15002%09red/mmu:15000%09red/mmu:15042%…
Antigen processing and presentation	KEGG PATHWAY	mmu04612	12	83	0.000808876	0.00537325	ENSMUSG00000021477|ENSMUSG00000067235|ENSMUSG00000053044|ENSMUSG00000030165|ENSMUSG00000037548|ENSMUSG00000053835|ENSMUSG00000036594|ENSMUSG00000021190|ENSMUSG00000021939|ENSMUSG00000024401|ENSMUSG00000038642|ENSMUSG00000041538	http://www.genome.jp/kegg-bin/show_pathway?mmu04612/mmu:13030%09red/mmu:16643%09red/mmu:13039%09red/mmu:15007%09red/mmu:15002%09red/mmu:15000%09red/mmu:15042%09red/mmu:14960%09red/mmu:13040%09red/mmu:12526%09red/mmu:19141%09red/mmu:21926%09red
ECM-receptor interaction	KEGG PATHWAY	mmu04512	12	83	0.000808876	0.00537325	ENSMUSG00000033327|ENSMUSG00000040152|ENSMUSG00000028364|ENSMUSG00000026768|ENSMUSG00000042284|ENSMUSG00000029304|ENSMUSG00000042453|ENSMUSG00000026840|ENSMUSG00000001281|ENSMUSG00000015533|ENSMUSG00000025348|ENSMUSG00000017009	http://www.genome.jp/kegg-bin/show_pathway?mmu04512/mmu:109700%09red/mmu:16421%09red/mmu:241226%09red/mmu:16404%09red/mmu:21825%09red/mmu:16398%09red/mmu:81877%09red/mmu:23928%09red/mmu:21923%09red/mmu:19699%09red/mmu:20971%09red/mmu:20750%09red
Arginine and proline metabolism	KEGG PATHWAY	mmu00330	9	49	0.000810851	0.0053821	ENSMUSG00000021125|ENSMUSG00000025190|ENSMUSG00000029811|ENSMUSG00000025283|ENSMUSG00000018906|ENSMUSG00000025037|ENSMUSG00000000308|ENSMUSG00000020826|ENSMUSG00000019987	http://www.genome.jp/kegg-bin/show_pathway?mmu00330/mmu:11846%09red/mmu:11847%09red/mmu:17161%09red/mmu:14718%09red/mmu:12716%09red/mmu:76507%09red/mmu:18126%09red/mmu:18452%09red/mmu:20229%09red
Herpes simplex infection	KEGG PATHWAY	mmu05168	21	206	0.000911826	0.00591627	ENSMUSG00000035042|ENSMUSG00000067235|ENSMUSG00000035385|ENSMUSG00000037548|ENSMUSG00000027995|ENSMUSG00000053835|ENSMUSG00000021250|ENSMUSG00000036594|ENSMUSG00000026874|ENSMUSG00000021025|ENSMUSG00000053113|ENSMUSG00000042349|ENSMUSG00000024401|ENSMUSG00000055116|ENSMUSG00000027398|ENSMUSG00000024778|ENSMUSG00000005824|ENSMUSG00000020893|ENSMUSG00000041538|ENSMUSG00000001128|ENSMUSG00000046245	http://www.genome.jp/kegg-bin/show_pathway?mmu05168/mmu:14281%09red/mmu:12702%09red/mmu:18636%09red/mmu:50930%09red/mmu:18626%09red/mmu:15007%09red/mmu:231805%09red/mmu:15002%09red/mmu:56489%09red/mmu:15000%09red/mmu:18035%09red/mmu:15042%09red/mmu:14960%09red/mmu:16176%09red/mmu:24088%09red/mmu:20296%09red/mmu:11865%09red/mmu:15139%09red/mmu:21926%09red/mmu:14102%09red/mmu:20304%09red
Amoebiasis	KEGG PATHWAY	mmu05146	14	110	0.00096253	0.00617347	ENSMUSG00000021403|ENSMUSG00000021125|ENSMUSG00000000290|ENSMUSG00000030786|ENSMUSG00000027995|ENSMUSG00000026840|ENSMUSG00000020901|ENSMUSG00000004951|ENSMUSG00000024401|ENSMUSG00000020826|ENSMUSG00000027398|ENSMUSG00000019987|ENSMUSG00000026073|ENSMUSG00000051439	http://www.genome.jp/kegg-bin/show_pathway?mmu05146/mmu:11846%09red/mmu:11847%09red/mmu:16414%09red/mmu:16409%09red/mmu:320207%09red/mmu:18126%09red/mmu:12475%09red/mmu:20706%09red/mmu:15507%09red/mmu:16176%09red/mmu:24088%09red/mmu:23928%09red/mmu:16178%09red/mmu:21926%09red
Fc gamma R-mediated phagocytosis	KEGG PATHWAY	mmu04666	12	86	0.00106818	0.00675279	ENSMUSG00000069662|ENSMUSG00000034116|ENSMUSG00000026288|ENSMUSG00000026656|ENSMUSG00000047945|ENSMUSG00000021457|ENSMUSG00000020901|ENSMUSG00000015947|ENSMUSG00000004508|ENSMUSG00000033220|ENSMUSG00000015950|ENSMUSG00000061878	http://www.genome.jp/kegg-bin/show_pathway?mmu04666/mmu:22324%09red/mmu:17357%09red/mmu:17118%09red/mmu:19354%09red/mmu:320207%09red/mmu:14389%09red/mmu:17969%09red/mmu:16331%09red/mmu:20963%09red/mmu:20698%09red/mmu:14129%09red/mmu:14130%09red
Lysosome	KEGG PATHWAY	mmu04142	15	125	0.00110926	0.00694428	ENSMUSG00000007891|ENSMUSG00000004552|ENSMUSG00000022500|ENSMUSG00000031266|ENSMUSG00000018774|ENSMUSG00000024121|ENSMUSG00000026177|ENSMUSG00000021190|ENSMUSG00000021939|ENSMUSG00000021477|ENSMUSG00000038642|ENSMUSG00000025351|ENSMUSG00000028111|ENSMUSG00000032359|ENSMUSG00000001348	http://www.genome.jp/kegg-bin/show_pathway?mmu04142/mmu:13030%09red/mmu:13033%09red/mmu:13034%09red/mmu:11605%09red/mmu:11433%09red/mmu:13038%09red/mmu:13036%09red/mmu:18173%09red/mmu:11984%09red/mmu:56722%09red/mmu:13039%09red/mmu:12512%09red/mmu:13040%09red/mmu:12514%09red/mmu:19141%09red
Toxoplasmosis	KEGG PATHWAY	mmu05145	14	112	0.00112624	0.00701387	ENSMUSG00000020623|ENSMUSG00000020901|ENSMUSG00000037548|ENSMUSG00000004040|ENSMUSG00000036594|ENSMUSG00000026840|ENSMUSG00000041538|ENSMUSG00000004864|ENSMUSG00000020826|ENSMUSG00000032000|ENSMUSG00000007659|ENSMUSG00000021025|ENSMUSG00000024401|ENSMUSG00000027995	http://www.genome.jp/kegg-bin/show_pathway?mmu05145/mmu:11796%09red/mmu:26415%09red/mmu:12048%09red/mmu:24088%09red/mmu:26399%09red/mmu:320207%09red/mmu:15002%09red/mmu:18035%09red/mmu:15000%09red/mmu:14960%09red/mmu:23928%09red/mmu:20848%09red/mmu:18126%09red/mmu:21926%09red
Salmonella infection	KEGG PATHWAY	mmu05132	11	78	0.0015757	0.00925514	ENSMUSG00000000982|ENSMUSG00000028917|ENSMUSG00000051439|ENSMUSG00000021250|ENSMUSG00000029380|ENSMUSG00000030793|ENSMUSG00000004864|ENSMUSG00000020826|ENSMUSG00000027399|ENSMUSG00000027398|ENSMUSG00000018930	http://www.genome.jp/kegg-bin/show_pathway?mmu05132/mmu:26415%09red/mmu:14825%09red/mmu:14281%09red/mmu:12475%09red/mmu:20303%09red/mmu:20302%09red/mmu:18126%09red/mmu:16176%09red/mmu:16175%09red/mmu:69582%09red/mmu:66824%09red
Focal adhesion	KEGG PATHWAY	mmu04510	20	202	0.00164328	0.00961834	ENSMUSG00000020053|ENSMUSG00000026840|ENSMUSG00000034116|ENSMUSG00000040152|ENSMUSG00000032000|ENSMUSG00000020901|ENSMUSG00000028364|ENSMUSG00000026768|ENSMUSG00000033327|ENSMUSG00000042284|ENSMUSG00000029304|ENSMUSG00000033220|ENSMUSG00000004791|ENSMUSG00000042453|ENSMUSG00000025856|ENSMUSG00000044951|ENSMUSG00000001281|ENSMUSG00000015533|ENSMUSG00000025348|ENSMUSG00000062960	http://www.genome.jp/kegg-bin/show_pathway?mmu04510/mmu:11796%09red/mmu:22324%09red/mmu:16000%09red/mmu:109700%09red/mmu:238564%09red/mmu:16542%09red/mmu:81877%09red/mmu:241226%09red/mmu:16404%09red/mmu:21825%09red/mmu:16398%09red/mmu:18654%09red/mmu:16421%09red/mmu:18590%09red/mmu:23928%09red/mmu:19354%09red/mmu:21923%09red/mmu:320207%09red/mmu:19699%09red/mmu:20750%09red
Allograft rejection	KEGG PATHWAY	mmu05330	9	55	0.00166465	0.00970273	ENSMUSG00000067235|ENSMUSG00000037548|ENSMUSG00000053835|ENSMUSG00000036594|ENSMUSG00000037202|ENSMUSG00000024401|ENSMUSG00000075122|ENSMUSG00000041538|ENSMUSG00000024778	http://www.genome.jp/kegg-bin/show_pathway?mmu05330/mmu:15007%09red/mmu:15002%09red/mmu:15000%09red/mmu:15042%09red/mmu:14960%09red/mmu:18646%09red/mmu:12519%09red/mmu:21926%09red/mmu:14102%09red
Prion diseases	KEGG PATHWAY	mmu05020	7	34	0.00172421	0.00992417	ENSMUSG00000035042|ENSMUSG00000027399|ENSMUSG00000026874|ENSMUSG00000036887|ENSMUSG00000027398|ENSMUSG00000036905|ENSMUSG00000036896	http://www.genome.jp/kegg-bin/show_pathway?mmu05020/mmu:12259%09red/mmu:20304%09red/mmu:12262%09red/mmu:16175%09red/mmu:12260%09red/mmu:15139%09red/mmu:16176%09red
T cell receptor signaling pathway	KEGG PATHWAY	mmu04660	13	106	0.00194471	0.0110504	ENSMUSG00000042351|ENSMUSG00000034116|ENSMUSG00000053044|ENSMUSG00000000409|ENSMUSG00000020901|ENSMUSG00000021250|ENSMUSG00000024235|ENSMUSG00000021025|ENSMUSG00000004864|ENSMUSG00000027347|ENSMUSG00000036526|ENSMUSG00000002699|ENSMUSG00000024401	http://www.genome.jp/kegg-bin/show_pathway?mmu04660/mmu:22324%09red/mmu:26415%09red/mmu:108723%09red/mmu:26410%09red/mmu:17444%09red/mmu:320207%09red/mmu:16818%09red/mmu:18035%09red/mmu:14281%09red/mmu:16822%09red/mmu:19419%09red/mmu:12526%09red/mmu:21926%09red
EGFR tyrosine kinase inhibitor resistance	KEGG PATHWAY	mmu01521	11	81	0.00206296	0.0116354	ENSMUSG00000020053|ENSMUSG00000048756|ENSMUSG00000027947|ENSMUSG00000020901|ENSMUSG00000004040|ENSMUSG00000054252|ENSMUSG00000031490|ENSMUSG00000025856|ENSMUSG00000018166|ENSMUSG00000007659|ENSMUSG00000062960	http://www.genome.jp/kegg-bin/show_pathway?mmu01521/mmu:13685%09red/mmu:13867%09red/mmu:320207%09red/mmu:14184%09red/mmu:16542%09red/mmu:16000%09red/mmu:12048%09red/mmu:18590%09red/mmu:20848%09red/mmu:16194%09red/mmu:56484%09red
Leukocyte transendothelial migration	KEGG PATHWAY	mmu04670	14	122	0.00233601	0.0128213	ENSMUSG00000052397|ENSMUSG00000070473|ENSMUSG00000047230|ENSMUSG00000034116|ENSMUSG00000026480|ENSMUSG00000000290|ENSMUSG00000030786|ENSMUSG00000017737|ENSMUSG00000047501|ENSMUSG00000004864|ENSMUSG00000020901|ENSMUSG00000033220|ENSMUSG00000015950|ENSMUSG00000071715	http://www.genome.jp/kegg-bin/show_pathway?mmu04670/mmu:12739%09red/mmu:22350%09red/mmu:26415%09red/mmu:16414%09red/mmu:16409%09red/mmu:12738%09red/mmu:19354%09red/mmu:320207%09red/mmu:17395%09red/mmu:22324%09red/mmu:17970%09red/mmu:17972%09red/mmu:17969%09red/mmu:12740%09red
Ras signaling pathway	KEGG PATHWAY	mmu04014	21	228	0.00284749	0.0150179	ENSMUSG00000020053|ENSMUSG00000032766|ENSMUSG00000027999|ENSMUSG00000004791|ENSMUSG00000002847|ENSMUSG00000020901|ENSMUSG00000005320|ENSMUSG00000054252|ENSMUSG00000006445|ENSMUSG00000025856|ENSMUSG00000024883|ENSMUSG00000027347|ENSMUSG00000033220|ENSMUSG00000004508|ENSMUSG00000021708|ENSMUSG00000019966|ENSMUSG00000004952|ENSMUSG00000007659|ENSMUSG00000071042|ENSMUSG00000031565|ENSMUSG00000062960	http://www.genome.jp/kegg-bin/show_pathway?mmu04014/mmu:85031%09red/mmu:17311%09red/mmu:14186%09red/mmu:320207%09red/mmu:14184%09red/mmu:14182%09red/mmu:54153%09red/mmu:66066%09red/mmu:19354%09red/mmu:16000%09red/mmu:12048%09red/mmu:66350%09red/mmu:14389%09red/mmu:18654%09red/mmu:16542%09red/mmu:18590%09red/mmu:19419%09red/mmu:19418%09red/mmu:225870%09red/mmu:240168%09red/mmu:13836%09red
Arginine biosynthesis	KEGG PATHWAY	mmu00220	5	19	0.00321129	0.0165815	ENSMUSG00000026473|ENSMUSG00000025190|ENSMUSG00000019987|ENSMUSG00000021125|ENSMUSG00000020826	http://www.genome.jp/kegg-bin/show_pathway?mmu00220/mmu:11846%09red/mmu:11847%09red/mmu:14645%09red/mmu:18126%09red/mmu:14718%09red
Type II diabetes mellitus	KEGG PATHWAY	mmu04930	8	50	0.00336105	0.0171015	ENSMUSG00000025877|ENSMUSG00000020901|ENSMUSG00000000628|ENSMUSG00000053113|ENSMUSG00000038894|ENSMUSG00000024401|ENSMUSG00000022878|ENSMUSG00000032294	http://www.genome.jp/kegg-bin/show_pathway?mmu04930/mmu:12702%09red/mmu:212032%09red/mmu:18746%09red/mmu:320207%09red/mmu:15277%09red/mmu:384783%09red/mmu:11450%09red/mmu:21926%09red
Aldosterone-regulated sodium reabsorption	KEGG PATHWAY	mmu04960	7	40	0.00385385	0.0189634	ENSMUSG00000020053|ENSMUSG00000026576|ENSMUSG00000020901|ENSMUSG00000019970|ENSMUSG00000030340|ENSMUSG00000024589|ENSMUSG00000047281	http://www.genome.jp/kegg-bin/show_pathway?mmu04960/mmu:320207%09red/mmu:20393%09red/mmu:16000%09red/mmu:20276%09red/mmu:83814%09red/mmu:55948%09red/mmu:11931%09red
AGE-RAGE signaling pathway in diabetic complications	KEGG PATHWAY	mmu04933	12	102	0.00387641	0.0190073	ENSMUSG00000024014|ENSMUSG00000020901|ENSMUSG00000004040|ENSMUSG00000028128|ENSMUSG00000026582|ENSMUSG00000004864|ENSMUSG00000021367|ENSMUSG00000035385|ENSMUSG00000024401|ENSMUSG00000027399|ENSMUSG00000027398|ENSMUSG00000037411	http://www.genome.jp/kegg-bin/show_pathway?mmu04933/mmu:20339%09red/mmu:26415%09red/mmu:16175%09red/mmu:14066%09red/mmu:320207%09red/mmu:18787%09red/mmu:16176%09red/mmu:20848%09red/mmu:13614%09red/mmu:20296%09red/mmu:21926%09red/mmu:18712%09red
Axon guidance	KEGG PATHWAY	mmu04360	17	175	0.00421476	0.0203917	ENSMUSG00000044641|ENSMUSG00000026121|ENSMUSG00000031217|ENSMUSG00000033220|ENSMUSG00000038264|ENSMUSG00000020901|ENSMUSG00000031398|ENSMUSG00000001227|ENSMUSG00000006445|ENSMUSG00000026235|ENSMUSG00000026640|ENSMUSG00000029869|ENSMUSG00000059810|ENSMUSG00000052516|ENSMUSG00000063626|ENSMUSG00000025810|ENSMUSG00000000627	http://www.genome.jp/kegg-bin/show_pathway?mmu04360/mmu:13838%09red/mmu:20361%09red/mmu:320207%09red/mmu:18186%09red/mmu:20359%09red/mmu:50780%09red/mmu:20355%09red/mmu:20353%09red/mmu:268902%09red/mmu:13836%09red/mmu:18845%09red/mmu:58220%09red/mmu:18846%09red/mmu:13848%09red/mmu:13641%09red/mmu:210801%09red/mmu:19354%09red
Intestinal immune network for IgA production	KEGG PATHWAY	mmu04672	7	41	0.00434666	0.0208993	ENSMUSG00000037548|ENSMUSG00000026417|ENSMUSG00000036594|ENSMUSG00000068105|ENSMUSG00000001281|ENSMUSG00000075122|ENSMUSG00000041538	http://www.genome.jp/kegg-bin/show_pathway?mmu04672/mmu:16421%09red/mmu:15002%09red/mmu:15000%09red/mmu:14960%09red/mmu:12519%09red/mmu:72049%09red/mmu:18703%09red
Jak-STAT signaling pathway	KEGG PATHWAY	mmu04630	16	161	0.0044244	0.0212341	ENSMUSG00000044244|ENSMUSG00000032578|ENSMUSG00000027947|ENSMUSG00000055737|ENSMUSG00000022346|ENSMUSG00000020901|ENSMUSG00000004040|ENSMUSG00000024014|ENSMUSG00000023067|ENSMUSG00000030748|ENSMUSG00000053113|ENSMUSG00000058755|ENSMUSG00000007659|ENSMUSG00000071713|ENSMUSG00000028859|ENSMUSG00000071714	http://www.genome.jp/kegg-bin/show_pathway?mmu04630/mmu:12986%09red/mmu:12700%09red/mmu:12702%09red/mmu:12048%09red/mmu:12983%09red/mmu:12575%09red/mmu:320207%09red/mmu:12984%09red/mmu:17869%09red/mmu:18413%09red/mmu:20848%09red/mmu:16190%09red/mmu:213208%09red/mmu:14600%09red/mmu:16194%09red/mmu:18712%09red
Central carbon metabolism in cancer	KEGG PATHWAY	mmu05230	9	66	0.00498127	0.0233838	ENSMUSG00000025877|ENSMUSG00000025161|ENSMUSG00000020901|ENSMUSG00000022346|ENSMUSG00000054252|ENSMUSG00000000628|ENSMUSG00000031565|ENSMUSG00000032294|ENSMUSG00000028645	http://www.genome.jp/kegg-bin/show_pathway?mmu05230/mmu:14184%09red/mmu:212032%09red/mmu:80879%09red/mmu:14182%09red/mmu:320207%09red/mmu:15277%09red/mmu:17869%09red/mmu:18746%09red/mmu:20525%09red
Epstein-Barr virus infection	KEGG PATHWAY	mmu05169	19	210	0.00523826	0.024385	ENSMUSG00000067235|ENSMUSG00000026616|ENSMUSG00000002111|ENSMUSG00000020901|ENSMUSG00000023067|ENSMUSG00000004040|ENSMUSG00000022346|ENSMUSG00000030724|ENSMUSG00000028874|ENSMUSG00000021457|ENSMUSG00000004864|ENSMUSG00000021025|ENSMUSG00000030591|ENSMUSG00000020623|ENSMUSG00000004951|ENSMUSG00000048120|ENSMUSG00000041608|ENSMUSG00000053835|ENSMUSG00000019850	http://www.genome.jp/kegg-bin/show_pathway?mmu05169/mmu:21929%09red/mmu:20375%09red/mmu:12478%09red/mmu:320207%09red/mmu:12575%09red/mmu:12495%09red/mmu:15007%09red/mmu:215446%09red/mmu:12902%09red/mmu:18035%09red/mmu:57296%09red/mmu:15042%09red/mmu:17869%09red/mmu:15507%09red/mmu:20848%09red/mmu:26399%09red/mmu:20963%09red/mmu:26415%09red/mmu:14191%09red
Sphingolipid signaling pathway	KEGG PATHWAY	mmu04071	13	123	0.00617139	0.0275932	ENSMUSG00000045092|ENSMUSG00000007891|ENSMUSG00000050931|ENSMUSG00000045087|ENSMUSG00000029120|ENSMUSG00000050511|ENSMUSG00000020901|ENSMUSG00000004508|ENSMUSG00000033220|ENSMUSG00000024401|ENSMUSG00000058715|ENSMUSG00000061878|ENSMUSG00000004864	http://www.genome.jp/kegg-bin/show_pathway?mmu04071/mmu:14127%09red/mmu:13033%09red/mmu:18386%09red/mmu:13609%09red/mmu:74442%09red/mmu:19354%09red/mmu:320207%09red/mmu:26415%09red/mmu:14389%09red/mmu:94226%09red/mmu:269643%09red/mmu:20698%09red/mmu:21926%09red
Asthma	KEGG PATHWAY	mmu05310	5	23	0.00643698	0.0283119	ENSMUSG00000024401|ENSMUSG00000037548|ENSMUSG00000058715|ENSMUSG00000036594|ENSMUSG00000041538	http://www.genome.jp/kegg-bin/show_pathway?mmu05310/mmu:21926%09red/mmu:14960%09red/mmu:15002%09red/mmu:15000%09red/mmu:14127%09red
Insulin resistance	KEGG PATHWAY	mmu04931	12	110	0.00666585	0.0289234	ENSMUSG00000067279|ENSMUSG00000020363|ENSMUSG00000027540|ENSMUSG00000004040|ENSMUSG00000021025|ENSMUSG00000021069|ENSMUSG00000053113|ENSMUSG00000038894|ENSMUSG00000046794|ENSMUSG00000024401|ENSMUSG00000020901|ENSMUSG00000028645	http://www.genome.jp/kegg-bin/show_pathway?mmu04931/mmu:12702%09red/mmu:20525%09red/mmu:53412%09red/mmu:110095%09red/mmu:320207%09red/mmu:19246%09red/mmu:244416%09red/mmu:18035%09red/mmu:14584%09red/mmu:20848%09red/mmu:384783%09red/mmu:21926%09red
Mineral absorption	KEGG PATHWAY	mmu04978	7	45	0.00680546	0.029392	ENSMUSG00000026576|ENSMUSG00000027015|ENSMUSG00000005413|ENSMUSG00000026177|ENSMUSG00000024661|ENSMUSG00000031762|ENSMUSG00000031765	http://www.genome.jp/kegg-bin/show_pathway?mmu04978/mmu:14319%09red/mmu:15368%09red/mmu:18173%09red/mmu:17750%09red/mmu:73649%09red/mmu:17748%09red/mmu:11931%09red
Signaling pathways regulating pluripotency of stem cells	KEGG PATHWAY	mmu04550	14	140	0.00710772	0.0305003	ENSMUSG00000020053|ENSMUSG00000004864|ENSMUSG00000022346|ENSMUSG00000020901|ENSMUSG00000004040|ENSMUSG00000054252|ENSMUSG00000050288|ENSMUSG00000003032|ENSMUSG00000005320|ENSMUSG00000041324|ENSMUSG00000042745|ENSMUSG00000037035|ENSMUSG00000031565|ENSMUSG00000022996	http://www.genome.jp/kegg-bin/show_pathway?mmu04550/mmu:14184%09red/mmu:57265%09red/mmu:14186%09red/mmu:22410%09red/mmu:14182%09red/mmu:320207%09red/mmu:16000%09red/mmu:26415%09red/mmu:17869%09red/mmu:15901%09red/mmu:20848%09red/mmu:16323%09red/mmu:16600%09red/mmu:16324%09red
Primary immunodeficiency	KEGG PATHWAY	mmu05340	6	35	0.00795981	0.0333618	ENSMUSG00000053044|ENSMUSG00000000409|ENSMUSG00000030724|ENSMUSG00000003379|ENSMUSG00000068105|ENSMUSG00000017697	http://www.genome.jp/kegg-bin/show_pathway?mmu05340/mmu:12478%09red/mmu:16818%09red/mmu:12526%09red/mmu:11486%09red/mmu:12518%09red/mmu:72049%09red
Small cell lung cancer	KEGG PATHWAY	mmu05222	10	85	0.00801114	0.033404	ENSMUSG00000022346|ENSMUSG00000020901|ENSMUSG00000026840|ENSMUSG00000020826|ENSMUSG00000073802|ENSMUSG00000032000|ENSMUSG00000007659|ENSMUSG00000021025|ENSMUSG00000015533|ENSMUSG00000059436	http://www.genome.jp/kegg-bin/show_pathway?mmu05222/mmu:11796%09red/mmu:12048%09red/mmu:12579%09red/mmu:320207%09red/mmu:18035%09red/mmu:16398%09red/mmu:17187%09red/mmu:17869%09red/mmu:23928%09red/mmu:18126%09red
Glycerolipid metabolism	KEGG PATHWAY	mmu00561	8	59	0.0081429	0.0338076	ENSMUSG00000029762|ENSMUSG00000031266|ENSMUSG00000036095|ENSMUSG00000024052|ENSMUSG00000020593|ENSMUSG00000015568|ENSMUSG00000030747|ENSMUSG00000025509	http://www.genome.jp/kegg-bin/show_pathway?mmu00561/mmu:11605%09red/mmu:14187%09red/mmu:14245%09red/mmu:67800%09red/mmu:66853%09red/mmu:64898%09red/mmu:16956%09red/mmu:217480%09red
Prolactin signaling pathway	KEGG PATHWAY	mmu04917	9	74	0.00961238	0.0389615	ENSMUSG00000048756|ENSMUSG00000004864|ENSMUSG00000032578|ENSMUSG00000020901|ENSMUSG00000004040|ENSMUSG00000022015|ENSMUSG00000053113|ENSMUSG00000019768|ENSMUSG00000021250	http://www.genome.jp/kegg-bin/show_pathway?mmu04917/mmu:12700%09red/mmu:12702%09red/mmu:320207%09red/mmu:26415%09red/mmu:14281%09red/mmu:21943%09red/mmu:13982%09red/mmu:20848%09red/mmu:56484%09red
Protein digestion and absorption	KEGG PATHWAY	mmu04974	10	90	0.0113294	0.0439423	ENSMUSG00000022462|ENSMUSG00000026576|ENSMUSG00000022371|ENSMUSG00000022180|ENSMUSG00000010095|ENSMUSG00000029675|ENSMUSG00000035000|ENSMUSG00000023243|ENSMUSG00000004098|ENSMUSG00000045672	http://www.genome.jp/kegg-bin/show_pathway?mmu04974/mmu:12818%09red/mmu:50934%09red/mmu:373864%09red/mmu:13482%09red/mmu:17254%09red/mmu:13717%09red/mmu:16529%09red/mmu:67760%09red/mmu:11931%09red/mmu:53867%09red
Nitrogen metabolism	KEGG PATHWAY	mmu00910	4	17	0.0115723	0.04437	ENSMUSG00000041261|ENSMUSG00000026473|ENSMUSG00000027555|ENSMUSG00000027559	http://www.genome.jp/kegg-bin/show_pathway?mmu00910/mmu:12319%09red/mmu:71934%09red/mmu:14645%09red/mmu:12350%09red
Hepatitis C	KEGG PATHWAY	mmu05160	13	136	0.0128244	0.0485703	ENSMUSG00000047230|ENSMUSG00000029120|ENSMUSG00000004040|ENSMUSG00000070473|ENSMUSG00000023067|ENSMUSG00000042349|ENSMUSG00000047501|ENSMUSG00000004864|ENSMUSG00000020901|ENSMUSG00000037936|ENSMUSG00000053113|ENSMUSG00000021025|ENSMUSG00000024401	http://www.genome.jp/kegg-bin/show_pathway?mmu05160/mmu:12739%09red/mmu:12738%09red/mmu:12702%09red/mmu:12575%09red/mmu:21926%09red/mmu:320207%09red/mmu:18035%09red/mmu:56489%09red/mmu:20848%09red/mmu:269643%09red/mmu:20778%09red/mmu:26415%09red/mmu:12740%09red
Measles	KEGG PATHWAY	mmu05162	13	137	0.0135042	0.0501909	ENSMUSG00000020901|ENSMUSG00000026656|ENSMUSG00000027995|ENSMUSG00000042349|ENSMUSG00000021025|ENSMUSG00000044583|ENSMUSG00000039304|ENSMUSG00000022074|ENSMUSG00000027399|ENSMUSG00000027398|ENSMUSG00000004040|ENSMUSG00000024778|ENSMUSG00000019850	http://www.genome.jp/kegg-bin/show_pathway?mmu05162/mmu:20848%09red/mmu:14130%09red/mmu:320207%09red/mmu:22035%09red/mmu:18035%09red/mmu:56489%09red/mmu:21929%09red/mmu:16176%09red/mmu:16175%09red/mmu:24088%09red/mmu:21933%09red/mmu:170743%09red/mmu:14102%09red
Viral myocarditis	KEGG PATHWAY	mmu05416	9	79	0.0138222	0.0509628	ENSMUSG00000067235|ENSMUSG00000000290|ENSMUSG00000033220|ENSMUSG00000037548|ENSMUSG00000053835|ENSMUSG00000036594|ENSMUSG00000037202|ENSMUSG00000075122|ENSMUSG00000041538	http://www.genome.jp/kegg-bin/show_pathway?mmu05416/mmu:16414%09red/mmu:15007%09red/mmu:19354%09red/mmu:15002%09red/mmu:15000%09red/mmu:15042%09red/mmu:14960%09red/mmu:18646%09red/mmu:12519%09red
Systemic lupus erythematosus	KEGG PATHWAY	mmu05322	13	141	0.0165032	0.0595183	ENSMUSG00000075122|ENSMUSG00000059089|ENSMUSG00000036594|ENSMUSG00000026874|ENSMUSG00000036887|ENSMUSG00000015947|ENSMUSG00000069273|ENSMUSG00000037548|ENSMUSG00000060093|ENSMUSG00000024401|ENSMUSG00000036905|ENSMUSG00000041538|ENSMUSG00000036896	http://www.genome.jp/kegg-bin/show_pathway?mmu05322/mmu:15000%09red/mmu:15139%09red/mmu:326619%09red/mmu:15002%09red/mmu:246256%09red/mmu:14129%09red/mmu:14960%09red/mmu:319151%09red/mmu:12260%09red/mmu:12519%09red/mmu:12259%09red/mmu:21926%09red/mmu:12262%09red
TGF-beta signaling pathway	KEGG PATHWAY	mmu04350	9	84	0.0192612	0.0669502	ENSMUSG00000040152|ENSMUSG00000022346|ENSMUSG00000027641|ENSMUSG00000073802|ENSMUSG00000041324|ENSMUSG00000042745|ENSMUSG00000037035|ENSMUSG00000024401|ENSMUSG00000021765	http://www.genome.jp/kegg-bin/show_pathway?mmu04350/mmu:12579%09red/mmu:14313%09red/mmu:17869%09red/mmu:15901%09red/mmu:16323%09red/mmu:21825%09red/mmu:21926%09red/mmu:16324%09red/mmu:19650%09red
Autoimmune thyroid disease	KEGG PATHWAY	mmu05320	8	70	0.0193849	0.0673242	ENSMUSG00000067235|ENSMUSG00000037548|ENSMUSG00000053835|ENSMUSG00000036594|ENSMUSG00000037202|ENSMUSG00000075122|ENSMUSG00000041538|ENSMUSG00000024778	http://www.genome.jp/kegg-bin/show_pathway?mmu05320/mmu:15007%09red/mmu:15002%09red/mmu:15000%09red/mmu:15042%09red/mmu:14960%09red/mmu:18646%09red/mmu:12519%09red/mmu:14102%09red
Acute myeloid leukemia	KEGG PATHWAY	mmu05221	7	57	0.0202797	0.0700407	ENSMUSG00000024014|ENSMUSG00000002111|ENSMUSG00000020901|ENSMUSG00000004040|ENSMUSG00000022346|ENSMUSG00000031490|ENSMUSG00000066687	http://www.genome.jp/kegg-bin/show_pathway?mmu05221/mmu:20375%09red/mmu:13685%09red/mmu:235320%09red/mmu:320207%09red/mmu:17869%09red/mmu:20848%09red/mmu:18712%09red
Adipocytokine signaling pathway	KEGG PATHWAY	mmu04920	8	72	0.0222437	0.0739102	ENSMUSG00000004040|ENSMUSG00000053113|ENSMUSG00000022878|ENSMUSG00000038894|ENSMUSG00000021025|ENSMUSG00000024401|ENSMUSG00000028599|ENSMUSG00000028645	http://www.genome.jp/kegg-bin/show_pathway?mmu04920/mmu:12702%09red/mmu:20525%09red/mmu:18035%09red/mmu:21938%09red/mmu:384783%09red/mmu:20848%09red/mmu:11450%09red/mmu:21926%09red
African trypanosomiasis	KEGG PATHWAY	mmu05143	5	33	0.0230774	0.076377	ENSMUSG00000027398|ENSMUSG00000073940|ENSMUSG00000026582|ENSMUSG00000024778|ENSMUSG00000024401	http://www.genome.jp/kegg-bin/show_pathway?mmu05143/mmu:20339%09red/mmu:101488143%09red/mmu:21926%09red/mmu:16176%09red/mmu:14102%09red
Regulation of actin cytoskeleton	KEGG PATHWAY	mmu04810	17	216	0.025349	0.0816357	ENSMUSG00000052397|ENSMUSG00000034116|ENSMUSG00000000290|ENSMUSG00000030786|ENSMUSG00000031565|ENSMUSG00000026768|ENSMUSG00000054252|ENSMUSG00000042284|ENSMUSG00000020901|ENSMUSG00000033220|ENSMUSG00000025856|ENSMUSG00000005320|ENSMUSG00000044951|ENSMUSG00000001281|ENSMUSG00000015533|ENSMUSG00000025348|ENSMUSG00000051439	http://www.genome.jp/kegg-bin/show_pathway?mmu04810/mmu:22350%09red/mmu:14184%09red/mmu:14186%09red/mmu:320207%09red/mmu:16414%09red/mmu:109700%09red/mmu:16409%09red/mmu:238564%09red/mmu:16421%09red/mmu:241226%09red/mmu:16404%09red/mmu:14182%09red/mmu:22324%09red/mmu:16398%09red/mmu:18590%09red/mmu:12475%09red/mmu:19354%09red
VEGF signaling pathway	KEGG PATHWAY	mmu04370	7	60	0.0254291	0.0817992	ENSMUSG00000020901|ENSMUSG00000004864|ENSMUSG00000033220|ENSMUSG00000004951|ENSMUSG00000016528|ENSMUSG00000062960|ENSMUSG00000061878	http://www.genome.jp/kegg-bin/show_pathway?mmu04370/mmu:26415%09red/mmu:17164%09red/mmu:16542%09red/mmu:19354%09red/mmu:320207%09red/mmu:15507%09red/mmu:20698%09red
Platelet activation	KEGG PATHWAY	mmu04611	11	121	0.0283216	0.0890503	ENSMUSG00000033860|ENSMUSG00000020901|ENSMUSG00000047250|ENSMUSG00000021457|ENSMUSG00000004864|ENSMUSG00000027347|ENSMUSG00000034881|ENSMUSG00000002699|ENSMUSG00000044951|ENSMUSG00000058715|ENSMUSG00000015533	http://www.genome.jp/kegg-bin/show_pathway?mmu04611/mmu:21390%09red/mmu:26415%09red/mmu:238564%09red/mmu:99571%09red/mmu:320207%09red/mmu:16398%09red/mmu:19419%09red/mmu:19224%09red/mmu:14127%09red/mmu:20963%09red/mmu:16822%09red
Biosynthesis of amino acids	KEGG PATHWAY	mmu01230	8	78	0.0325786	0.0992657	ENSMUSG00000021125|ENSMUSG00000026473|ENSMUSG00000025190|ENSMUSG00000063524|ENSMUSG00000037798|ENSMUSG00000057666|ENSMUSG00000019987|ENSMUSG00000032294	http://www.genome.jp/kegg-bin/show_pathway?mmu01230/mmu:11846%09red/mmu:11847%09red/mmu:14645%09red/mmu:11720%09red/mmu:18746%09red/mmu:13806%09red/mmu:14718%09red/mmu:14433%09red
Butirosin and neomycin biosynthesis	KEGG PATHWAY	mmu00524	2	5	0.0339758	0.100363	ENSMUSG00000025877|ENSMUSG00000000628	http://www.genome.jp/kegg-bin/show_pathway?mmu00524/mmu:212032%09red/mmu:15277%09red
Alanine, aspartate and glutamate metabolism	KEGG PATHWAY	mmu00250	5	37	0.033994	0.100363	ENSMUSG00000026473|ENSMUSG00000025190|ENSMUSG00000020363|ENSMUSG00000020774|ENSMUSG00000011148	http://www.genome.jp/kegg-bin/show_pathway?mmu00250/mmu:11565%09red/mmu:14718%09red/mmu:11484%09red/mmu:14584%09red/mmu:14645%09red
Histidine metabolism	KEGG PATHWAY	mmu00340	4	25	0.0350012	0.101687	ENSMUSG00000027360|ENSMUSG00000029811|ENSMUSG00000025037|ENSMUSG00000020774	http://www.genome.jp/kegg-bin/show_pathway?mmu00340/mmu:15186%09red/mmu:11484%09red/mmu:17161%09red/mmu:76507%09red
Glycolysis / Gluconeogenesis	KEGG PATHWAY	mmu00010	7	65	0.0358761	0.10394	ENSMUSG00000025877|ENSMUSG00000074207|ENSMUSG00000063524|ENSMUSG00000000628|ENSMUSG00000055301|ENSMUSG00000057666|ENSMUSG00000032294	http://www.genome.jp/kegg-bin/show_pathway?mmu00010/mmu:212032%09red/mmu:18746%09red/mmu:13806%09red/mmu:15277%09red/mmu:11529%09red/mmu:14433%09red/mmu:11522%09red
Endocrine resistance	KEGG PATHWAY	mmu01522	9	95	0.0363841	0.105121	ENSMUSG00000020053|ENSMUSG00000020901|ENSMUSG00000021250|ENSMUSG00000017737|ENSMUSG00000023067|ENSMUSG00000027314|ENSMUSG00000004864|ENSMUSG00000019768|ENSMUSG00000014773	http://www.genome.jp/kegg-bin/show_pathway?mmu01522/mmu:26415%09red/mmu:16000%09red/mmu:12575%09red/mmu:13388%09red/mmu:320207%09red/mmu:17395%09red/mmu:14281%09red/mmu:13982%09red/mmu:54485%09red
Tyrosine metabolism	KEGG PATHWAY	mmu00350	5	39	0.0404726	0.114895	ENSMUSG00000033307|ENSMUSG00000025190|ENSMUSG00000074207|ENSMUSG00000025037|ENSMUSG00000055301	http://www.genome.jp/kegg-bin/show_pathway?mmu00350/mmu:11529%09red/mmu:17319%09red/mmu:11522%09red/mmu:17161%09red/mmu:14718%09red
Neuroactive ligand-receptor interaction	KEGG PATHWAY	mmu04080	20	286	0.0447184	0.122518	ENSMUSG00000045092|ENSMUSG00000052270|ENSMUSG00000023132|ENSMUSG00000055737|ENSMUSG00000045087|ENSMUSG00000031489|ENSMUSG00000045730|ENSMUSG00000028036|ENSMUSG00000046908|ENSMUSG00000044338|ENSMUSG00000032860|ENSMUSG00000050511|ENSMUSG00000049130|ENSMUSG00000034881|ENSMUSG00000045551|ENSMUSG00000040552|ENSMUSG00000056529|ENSMUSG00000024027|ENSMUSG00000022758|ENSMUSG00000059588	http://www.genome.jp/kegg-bin/show_pathway?mmu04080/mmu:21390%09red/mmu:14293%09red/mmu:16995%09red/mmu:14938%09red/mmu:14289%09red/mmu:13609%09red/mmu:23796%09red/mmu:11556%09red/mmu:12273%09red/mmu:19204%09red/mmu:11555%09red/mmu:94226%09red/mmu:12267%09red/mmu:19220%09red/mmu:14600%09red/mmu:18386%09red/mmu:18440%09red/mmu:14652%09red/mmu:54598%09red/mmu:18442%09red
Bladder cancer	KEGG PATHWAY	mmu05219	5	41	0.0476498	0.128611	ENSMUSG00000023067|ENSMUSG00000017737|ENSMUSG00000054252|ENSMUSG00000040152|ENSMUSG00000022346	http://www.genome.jp/kegg-bin/show_pathway?mmu05219/mmu:14184%09red/mmu:21825%09red/mmu:17869%09red/mmu:17395%09red/mmu:12575%09red
Renin secretion	KEGG PATHWAY	mmu04924	7	70	0.048823	0.130893	ENSMUSG00000022489|ENSMUSG00000056025|ENSMUSG00000031489|ENSMUSG00000045730|ENSMUSG00000041695|ENSMUSG00000021939|ENSMUSG00000031980	http://www.genome.jp/kegg-bin/show_pathway?mmu04924/mmu:13030%09red/mmu:11606%09red/mmu:12722%09red/mmu:11555%09red/mmu:11556%09red/mmu:16518%09red/mmu:18574%09red
Regulation of lipolysis in adipocytes	KEGG PATHWAY	mmu04923	6	57	0.0544719	0.14179	ENSMUSG00000031489|ENSMUSG00000020901|ENSMUSG00000047250|ENSMUSG00000045730|ENSMUSG00000038894|ENSMUSG00000025509	http://www.genome.jp/kegg-bin/show_pathway?mmu04923/mmu:66853%09red/mmu:11555%09red/mmu:11556%09red/mmu:320207%09red/mmu:384783%09red/mmu:19224%09red
Circadian rhythm	KEGG PATHWAY	mmu04710	4	30	0.057789	0.14819	ENSMUSG00000055116|ENSMUSG00000030103|ENSMUSG00000020893|ENSMUSG00000068742	http://www.genome.jp/kegg-bin/show_pathway?mmu04710/mmu:11865%09red/mmu:12953%09red/mmu:20893%09red/mmu:18626%09red
Retinol metabolism	KEGG PATHWAY	mmu00830	8	90	0.06207	0.156862	ENSMUSG00000074207|ENSMUSG00000013584|ENSMUSG00000055301|ENSMUSG00000028003|ENSMUSG00000063415|ENSMUSG00000030483|ENSMUSG00000032315|ENSMUSG00000027068	http://www.genome.jp/kegg-bin/show_pathway?mmu00830/mmu:79235%09red/mmu:11522%09red/mmu:19378%09red/mmu:241452%09red/mmu:11529%09red/mmu:232174%09red/mmu:13088%09red/mmu:13076%09red
Purine metabolism	KEGG PATHWAY	mmu00230	13	176	0.0675587	0.165874	ENSMUSG00000024066|ENSMUSG00000028525|ENSMUSG00000022489|ENSMUSG00000048120|ENSMUSG00000041119|ENSMUSG00000058624|ENSMUSG00000011148|ENSMUSG00000031842|ENSMUSG00000005686|ENSMUSG00000017697|ENSMUSG00000041608|ENSMUSG00000053965|ENSMUSG00000032294	http://www.genome.jp/kegg-bin/show_pathway?mmu00230/mmu:12495%09red/mmu:215446%09red/mmu:18746%09red/mmu:18578%09red/mmu:14544%09red/mmu:11717%09red/mmu:22436%09red/mmu:242202%09red/mmu:18574%09red/mmu:11565%09red/mmu:18585%09red/mmu:11486%09red/mmu:110385%09red
Galactose metabolism	KEGG PATHWAY	mmu00052	4	32	0.0686687	0.167837	ENSMUSG00000029762|ENSMUSG00000025877|ENSMUSG00000000628|ENSMUSG00000031266	http://www.genome.jp/kegg-bin/show_pathway?mmu00052/mmu:11605%09red/mmu:212032%09red/mmu:14187%09red/mmu:15277%09red
ABC transporters	KEGG PATHWAY	mmu02010	5	46	0.0686789	0.167837	ENSMUSG00000028970|ENSMUSG00000004668|ENSMUSG00000029299|ENSMUSG00000015243|ENSMUSG00000041828	http://www.genome.jp/kegg-bin/show_pathway?mmu02010/mmu:268379%09red/mmu:217258%09red/mmu:18669%09red/mmu:27405%09red/mmu:11303%09red
Tryptophan metabolism	KEGG PATHWAY	mmu00380	5	46	0.0686789	0.167837	ENSMUSG00000029811|ENSMUSG00000032315|ENSMUSG00000024087|ENSMUSG00000025037|ENSMUSG00000039783	http://www.genome.jp/kegg-bin/show_pathway?mmu00380/mmu:98256%09red/mmu:13076%09red/mmu:13078%09red/mmu:17161%09red/mmu:76507%09red
Cytosolic DNA-sensing pathway	KEGG PATHWAY	mmu04623	6	61	0.0694261	0.169219	ENSMUSG00000035042|ENSMUSG00000030793|ENSMUSG00000042349|ENSMUSG00000021025|ENSMUSG00000027398|ENSMUSG00000018930	http://www.genome.jp/kegg-bin/show_pathway?mmu04623/mmu:20303%09red/mmu:18035%09red/mmu:56489%09red/mmu:20304%09red/mmu:66824%09red/mmu:16176%09red
Phospholipase D signaling pathway	KEGG PATHWAY	mmu04072	11	144	0.0738558	0.178921	ENSMUSG00000036095|ENSMUSG00000020901|ENSMUSG00000028036|ENSMUSG00000025856|ENSMUSG00000021457|ENSMUSG00000004508|ENSMUSG00000017132|ENSMUSG00000019966|ENSMUSG00000058715|ENSMUSG00000026180|ENSMUSG00000061878	http://www.genome.jp/kegg-bin/show_pathway?mmu04072/mmu:14127%09red/mmu:12765%09red/mmu:17311%09red/mmu:320207%09red/mmu:14389%09red/mmu:19220%09red/mmu:18590%09red/mmu:19157%09red/mmu:20963%09red/mmu:20698%09red/mmu:217480%09red
Hepatitis B	KEGG PATHWAY	mmu05161	11	145	0.0765198	0.183201	ENSMUSG00000022346|ENSMUSG00000020901|ENSMUSG00000023067|ENSMUSG00000027995|ENSMUSG00000017737|ENSMUSG00000021250|ENSMUSG00000042349|ENSMUSG00000021025|ENSMUSG00000024401|ENSMUSG00000004040|ENSMUSG00000024778	http://www.genome.jp/kegg-bin/show_pathway?mmu05161/mmu:24088%09red/mmu:12575%09red/mmu:320207%09red/mmu:17395%09red/mmu:14281%09red/mmu:18035%09red/mmu:56489%09red/mmu:17869%09red/mmu:20848%09red/mmu:21926%09red/mmu:14102%09red
Longevity regulating pathway	KEGG PATHWAY	mmu04211	8	95	0.0780983	0.186099	ENSMUSG00000020053|ENSMUSG00000048756|ENSMUSG00000028893|ENSMUSG00000038332|ENSMUSG00000020901|ENSMUSG00000031490|ENSMUSG00000022878|ENSMUSG00000038894	http://www.genome.jp/kegg-bin/show_pathway?mmu04211/mmu:13685%09red/mmu:16000%09red/mmu:320207%09red/mmu:230784%09red/mmu:384783%09red/mmu:11450%09red/mmu:140742%09red/mmu:56484%09red
Amino sugar and nucleotide sugar metabolism	KEGG PATHWAY	mmu00520	5	49	0.0833939	0.19314	ENSMUSG00000025877|ENSMUSG00000000628|ENSMUSG00000016756|ENSMUSG00000062778|ENSMUSG00000020363	http://www.genome.jp/kegg-bin/show_pathway?mmu00520/mmu:81600%09red/mmu:212032%09red/mmu:14584%09red/mmu:12763%09red/mmu:15277%09red
Fructose and mannose metabolism	KEGG PATHWAY	mmu00051	4	35	0.0868046	0.199434	ENSMUSG00000029762|ENSMUSG00000025877|ENSMUSG00000000628|ENSMUSG00000026773	http://www.genome.jp/kegg-bin/show_pathway?mmu00051/mmu:170768%09red/mmu:212032%09red/mmu:14187%09red/mmu:15277%09red
Hypertrophic cardiomyopathy (HCM)	KEGG PATHWAY	mmu05410	7	84	0.0992256	0.218845	ENSMUSG00000020053|ENSMUSG00000026768|ENSMUSG00000042284|ENSMUSG00000024401|ENSMUSG00000001281|ENSMUSG00000015533|ENSMUSG00000025348	http://www.genome.jp/kegg-bin/show_pathway?mmu05410/mmu:16000%09red/mmu:109700%09red/mmu:16421%09red/mmu:241226%09red/mmu:16404%09red/mmu:16398%09red/mmu:21926%09red
Amyotrophic lateral sclerosis (ALS)	KEGG PATHWAY	mmu05014	5	52	0.0996328	0.219454	ENSMUSG00000007659|ENSMUSG00000024401|ENSMUSG00000020623|ENSMUSG00000004864|ENSMUSG00000028599	http://www.genome.jp/kegg-bin/show_pathway?mmu05014/mmu:21938%09red/mmu:26415%09red/mmu:12048%09red/mmu:21926%09red/mmu:26399%09red
Phenylalanine metabolism	KEGG PATHWAY	mmu00360	3	23	0.100496	0.219508	ENSMUSG00000033307|ENSMUSG00000025190|ENSMUSG00000025037	http://www.genome.jp/kegg-bin/show_pathway?mmu00360/mmu:17319%09red/mmu:17161%09red/mmu:14718%09red
mTOR signaling pathway	KEGG PATHWAY	mmu04150	11	155	0.106457	0.22754	ENSMUSG00000020053|ENSMUSG00000028893|ENSMUSG00000020901|ENSMUSG00000010095|ENSMUSG00000019970|ENSMUSG00000050288|ENSMUSG00000031490|ENSMUSG00000024401|ENSMUSG00000020108|ENSMUSG00000020593|ENSMUSG00000022996	http://www.genome.jp/kegg-bin/show_pathway?mmu04150/mmu:13685%09red/mmu:57265%09red/mmu:230784%09red/mmu:14245%09red/mmu:20393%09red/mmu:16000%09red/mmu:17254%09red/mmu:74747%09red/mmu:22410%09red/mmu:320207%09red/mmu:21926%09red
Vitamin digestion and absorption	KEGG PATHWAY	mmu04977	3	24	0.109599	0.232064	ENSMUSG00000037936|ENSMUSG00000028003|ENSMUSG00000020432	http://www.genome.jp/kegg-bin/show_pathway?mmu04977/mmu:21452%09red/mmu:20778%09red/mmu:79235%09red
Insulin signaling pathway	KEGG PATHWAY	mmu04910	10	140	0.116336	0.244349	ENSMUSG00000025877|ENSMUSG00000067279|ENSMUSG00000027540|ENSMUSG00000031490|ENSMUSG00000021069|ENSMUSG00000000628|ENSMUSG00000053113|ENSMUSG00000038894|ENSMUSG00000046794|ENSMUSG00000020901	http://www.genome.jp/kegg-bin/show_pathway?mmu04910/mmu:12702%09red/mmu:212032%09red/mmu:53412%09red/mmu:110095%09red/mmu:320207%09red/mmu:19246%09red/mmu:15277%09red/mmu:13685%09red/mmu:384783%09red/mmu:244416%09red
Dilated cardiomyopathy	KEGG PATHWAY	mmu05414	7	88	0.117451	0.246073	ENSMUSG00000020053|ENSMUSG00000026768|ENSMUSG00000042284|ENSMUSG00000024401|ENSMUSG00000001281|ENSMUSG00000015533|ENSMUSG00000025348	http://www.genome.jp/kegg-bin/show_pathway?mmu05414/mmu:16000%09red/mmu:109700%09red/mmu:16421%09red/mmu:241226%09red/mmu:16404%09red/mmu:16398%09red/mmu:21926%09red
Fat digestion and absorption	KEGG PATHWAY	mmu04975	4	40	0.12154	0.247998	ENSMUSG00000037936|ENSMUSG00000030747|ENSMUSG00000027999|ENSMUSG00000015243	http://www.genome.jp/kegg-bin/show_pathway?mmu04975/mmu:20778%09red/mmu:66350%09red/mmu:11303%09red/mmu:67800%09red
Prostate cancer	KEGG PATHWAY	mmu05215	7	89	0.122261	0.249288	ENSMUSG00000020053|ENSMUSG00000020901|ENSMUSG00000023067|ENSMUSG00000025856|ENSMUSG00000021025|ENSMUSG00000031565|ENSMUSG00000046532	http://www.genome.jp/kegg-bin/show_pathway?mmu05215/mmu:16000%09red/mmu:14182%09red/mmu:12575%09red/mmu:11835%09red/mmu:320207%09red/mmu:18035%09red/mmu:18590%09red
Chronic myeloid leukemia	KEGG PATHWAY	mmu05220	6	73	0.126913	0.258332	ENSMUSG00000022346|ENSMUSG00000020901|ENSMUSG00000023067|ENSMUSG00000004508|ENSMUSG00000007659|ENSMUSG00000021025	http://www.genome.jp/kegg-bin/show_pathway?mmu05220/mmu:12048%09red/mmu:12575%09red/mmu:320207%09red/mmu:18035%09red/mmu:14389%09red/mmu:17869%09red
Calcium signaling pathway	KEGG PATHWAY	mmu04020	12	180	0.129706	0.262167	ENSMUSG00000022489|ENSMUSG00000031489|ENSMUSG00000028036|ENSMUSG00000018166|ENSMUSG00000045730|ENSMUSG00000034881|ENSMUSG00000022758|ENSMUSG00000022416|ENSMUSG00000020826|ENSMUSG00000044951|ENSMUSG00000056529|ENSMUSG00000061878	http://www.genome.jp/kegg-bin/show_pathway?mmu04020/mmu:21390%09red/mmu:238564%09red/mmu:11555%09red/mmu:11556%09red/mmu:19204%09red/mmu:19220%09red/mmu:239556%09red/mmu:18126%09red/mmu:13867%09red/mmu:18440%09red/mmu:20698%09red/mmu:18574%09red
Folate biosynthesis	KEGG PATHWAY	mmu00790	2	13	0.135495	0.269701	ENSMUSG00000064120|ENSMUSG00000028766	http://www.genome.jp/kegg-bin/show_pathway?mmu00790/mmu:56738%09red/mmu:11647%09red
Ovarian steroidogenesis	KEGG PATHWAY	mmu04913	5	58	0.136396	0.271365	ENSMUSG00000020053|ENSMUSG00000015224|ENSMUSG00000037936|ENSMUSG00000024087|ENSMUSG00000032315	http://www.genome.jp/kegg-bin/show_pathway?mmu04913/mmu:20778%09red/mmu:16000%09red/mmu:74519%09red/mmu:13078%09red/mmu:13076%09red
Non-alcoholic fatty liver disease (NAFLD)	KEGG PATHWAY	mmu04932	10	147	0.143773	0.283884	ENSMUSG00000027947|ENSMUSG00000020901|ENSMUSG00000030785|ENSMUSG00000053113|ENSMUSG00000024778|ENSMUSG00000038894|ENSMUSG00000024401|ENSMUSG00000027399|ENSMUSG00000027398|ENSMUSG00000022878	http://www.genome.jp/kegg-bin/show_pathway?mmu04932/mmu:12702%09red/mmu:320207%09red/mmu:12862%09red/mmu:384783%09red/mmu:16176%09red/mmu:16175%09red/mmu:11450%09red/mmu:21926%09red/mmu:16194%09red/mmu:14102%09red
MicroRNAs in cancer	KEGG PATHWAY	mmu05206	17	280	0.147741	0.29096	ENSMUSG00000069662|ENSMUSG00000052397|ENSMUSG00000024087|ENSMUSG00000024014|ENSMUSG00000040152|ENSMUSG00000022346|ENSMUSG00000028364|ENSMUSG00000004040|ENSMUSG00000017737|ENSMUSG00000054252|ENSMUSG00000033327|ENSMUSG00000018166|ENSMUSG00000028970|ENSMUSG00000023067|ENSMUSG00000025856|ENSMUSG00000038894|ENSMUSG00000020108	http://www.genome.jp/kegg-bin/show_pathway?mmu05206/mmu:22350%09red/mmu:13867%09red/mmu:14184%09red/mmu:20848%09red/mmu:12575%09red/mmu:384783%09red/mmu:17395%09red/mmu:74747%09red/mmu:81877%09red/mmu:17869%09red/mmu:18669%09red/mmu:13078%09red/mmu:17118%09red/mmu:21923%09red/mmu:21825%09red/mmu:18590%09red/mmu:18712%09red
Platinum drug resistance	KEGG PATHWAY	mmu01524	6	78	0.156042	0.300384	ENSMUSG00000020901|ENSMUSG00000024521|ENSMUSG00000023067|ENSMUSG00000032000|ENSMUSG00000007659|ENSMUSG00000024778	http://www.genome.jp/kegg-bin/show_pathway?mmu01524/mmu:11796%09red/mmu:12048%09red/mmu:12575%09red/mmu:320207%09red/mmu:58801%09red/mmu:14102%09red
Carbohydrate digestion and absorption	KEGG PATHWAY	mmu04973	4	45	0.161204	0.308257	ENSMUSG00000020901|ENSMUSG00000025877|ENSMUSG00000000628|ENSMUSG00000026576	http://www.genome.jp/kegg-bin/show_pathway?mmu04973/mmu:320207%09red/mmu:212032%09red/mmu:15277%09red/mmu:11931%09red
Hippo signaling pathway	KEGG PATHWAY	mmu04390	10	154	0.174235	0.323645	ENSMUSG00000044641|ENSMUSG00000022346|ENSMUSG00000029120|ENSMUSG00000037411|ENSMUSG00000000290|ENSMUSG00000050288|ENSMUSG00000042745|ENSMUSG00000022676|ENSMUSG00000022996|ENSMUSG00000031661	http://www.genome.jp/kegg-bin/show_pathway?mmu04390/mmu:57265%09red/mmu:22410%09red/mmu:16414%09red/mmu:18787%09red/mmu:58220%09red/mmu:93960%09red/mmu:17869%09red/mmu:269643%09red/mmu:20583%09red/mmu:15901%09red
Sphingolipid metabolism	KEGG PATHWAY	mmu00600	4	48	0.186975	0.340435	ENSMUSG00000056124|ENSMUSG00000031266|ENSMUSG00000050931|ENSMUSG00000061878	http://www.genome.jp/kegg-bin/show_pathway?mmu00600/mmu:11605%09red/mmu:56386%09red/mmu:20698%09red/mmu:74442%09red
Choline metabolism in cancer	KEGG PATHWAY	mmu05231	7	101	0.187271	0.340723	ENSMUSG00000036095|ENSMUSG00000020901|ENSMUSG00000021250|ENSMUSG00000031490|ENSMUSG00000025856|ENSMUSG00000033220|ENSMUSG00000020334	http://www.genome.jp/kegg-bin/show_pathway?mmu05231/mmu:13685%09red/mmu:30805%09red/mmu:19354%09red/mmu:320207%09red/mmu:14281%09red/mmu:18590%09red/mmu:217480%09red
Apoptosis - multiple species	KEGG PATHWAY	mmu04215	3	32	0.19187	0.347984	ENSMUSG00000024521|ENSMUSG00000032000|ENSMUSG00000007659	http://www.genome.jp/kegg-bin/show_pathway?mmu04215/mmu:11796%09red/mmu:12048%09red/mmu:58801%09red
cAMP signaling pathway	KEGG PATHWAY	mmu04024	12	197	0.196035	0.353732	ENSMUSG00000028525|ENSMUSG00000026576|ENSMUSG00000034116|ENSMUSG00000020901|ENSMUSG00000021250|ENSMUSG00000064325|ENSMUSG00000045730|ENSMUSG00000033220|ENSMUSG00000031842|ENSMUSG00000045502|ENSMUSG00000021025|ENSMUSG00000024027	http://www.genome.jp/kegg-bin/show_pathway?mmu04024/mmu:22324%09red/mmu:80885%09red/mmu:11555%09red/mmu:19354%09red/mmu:320207%09red/mmu:18035%09red/mmu:14281%09red/mmu:18578%09red/mmu:14652%09red/mmu:11931%09red/mmu:110385%09red/mmu:15245%09red
Metabolic pathways	KEGG PATHWAY	mmu01100	64	1268	0.206455	0.367744	ENSMUSG00000025877|ENSMUSG00000021125|ENSMUSG00000020363|ENSMUSG00000029695|ENSMUSG00000027952|ENSMUSG00000013584|ENSMUSG00000024052|ENSMUSG00000020572|ENSMUSG00000020638|ENSMUSG00000063415|ENSMUSG00000025037|ENSMUSG00000021360|ENSMUSG00000020826|ENSMUSG00000074207|ENSMUSG00000030657|ENSMUSG00000028766|ENSMUSG00000005686|ENSMUSG00000003484|ENSMUSG00000029811|ENSMUSG00000026473|ENSMUSG00000035878|…	http://www.genome.jp/kegg-bin/show_pathway?mmu01100/mmu:11846%09red/mmu:11847%09red/mmu:14645%09red/mmu:212032%09red/mmu:17161%09red/mmu:14718%09red/mmu:270084%09red/mmu:110095%09red/mmu:11647%09red/mmu:56386%09red/mmu:233781%09red/mmu:14584%09red/mmu:232174%09red/mmu:76507%09red/mmu:27226%09red/mmu:11522%09red/mmu:18746%09red/mmu:235386%09red/mmu:14245%09red/mmu:67800%09red/mmu:64898%09red/mmu:1…
Cell cycle	KEGG PATHWAY	mmu04110	8	123	0.207377	0.369229	ENSMUSG00000002297|ENSMUSG00000022346|ENSMUSG00000027641|ENSMUSG00000021453|ENSMUSG00000023067|ENSMUSG00000073802|ENSMUSG00000096472|ENSMUSG00000047281	http://www.genome.jp/kegg-bin/show_pathway?mmu04110/mmu:12575%09red/mmu:27214%09red/mmu:12579%09red/mmu:12581%09red/mmu:17869%09red/mmu:23882%09red/mmu:55948%09red/mmu:19650%09red
RIG-I-like receptor signaling pathway	KEGG PATHWAY	mmu04622	5	68	0.208448	0.371056	ENSMUSG00000021025|ENSMUSG00000024401|ENSMUSG00000033107|ENSMUSG00000042349|ENSMUSG00000004864	http://www.genome.jp/kegg-bin/show_pathway?mmu04622/mmu:56489%09red/mmu:26415%09red/mmu:21926%09red/mmu:18035%09red/mmu:67664%09red
Wnt signaling pathway	KEGG PATHWAY	mmu04310	9	143	0.213187	0.376951	ENSMUSG00000036158|ENSMUSG00000026556|ENSMUSG00000022346|ENSMUSG00000033220|ENSMUSG00000027996|ENSMUSG00000031548|ENSMUSG00000050288|ENSMUSG00000022996|ENSMUSG00000031661	http://www.genome.jp/kegg-bin/show_pathway?mmu04310/mmu:57265%09red/mmu:22410%09red/mmu:93840%09red/mmu:19354%09red/mmu:106042%09red/mmu:93960%09red/mmu:17869%09red/mmu:20377%09red/mmu:20319%09red
AMPK signaling pathway	KEGG PATHWAY	mmu04152	8	127	0.230502	0.38506	ENSMUSG00000020053|ENSMUSG00000048756|ENSMUSG00000029120|ENSMUSG00000031490|ENSMUSG00000020901|ENSMUSG00000022878|ENSMUSG00000038894|ENSMUSG00000026773	http://www.genome.jp/kegg-bin/show_pathway?mmu04152/mmu:16000%09red/mmu:320207%09red/mmu:13685%09red/mmu:384783%09red/mmu:269643%09red/mmu:170768%09red/mmu:11450%09red/mmu:56484%09red
Melanoma	KEGG PATHWAY	mmu05218	5	71	0.23213	0.38506	ENSMUSG00000020053|ENSMUSG00000020901|ENSMUSG00000031565|ENSMUSG00000023067|ENSMUSG00000025856	http://www.genome.jp/kegg-bin/show_pathway?mmu05218/mmu:320207%09red/mmu:16000%09red/mmu:12575%09red/mmu:18590%09red/mmu:14182%09red
Bile secretion	KEGG PATHWAY	mmu04976	5	71	0.23213	0.38506	ENSMUSG00000028970|ENSMUSG00000026576|ENSMUSG00000037936|ENSMUSG00000063975|ENSMUSG00000028645	http://www.genome.jp/kegg-bin/show_pathway?mmu04976/mmu:20778%09red/mmu:20525%09red/mmu:11931%09red/mmu:18669%09red/mmu:108096%09red
Viral carcinogenesis	KEGG PATHWAY	mmu05203	13	226	0.237196	0.391132	ENSMUSG00000067235|ENSMUSG00000020901|ENSMUSG00000004040|ENSMUSG00000053835|ENSMUSG00000023067|ENSMUSG00000024521|ENSMUSG00000021457|ENSMUSG00000021025|ENSMUSG00000073802|ENSMUSG00000016528|ENSMUSG00000060093|ENSMUSG00000027641|ENSMUSG00000032294	http://www.genome.jp/kegg-bin/show_pathway?mmu05203/mmu:17164%09red/mmu:18746%09red/mmu:12575%09red/mmu:326619%09red/mmu:15007%09red/mmu:12579%09red/mmu:320207%09red/mmu:58801%09red/mmu:18035%09red/mmu:15042%09red/mmu:20848%09red/mmu:20963%09red/mmu:19650%09red
Arrhythmogenic right ventricular cardiomyopathy (ARVC)	KEGG PATHWAY	mmu05412	5	74	0.256527	0.41337	ENSMUSG00000001281|ENSMUSG00000026768|ENSMUSG00000025348|ENSMUSG00000015533|ENSMUSG00000042284	http://www.genome.jp/kegg-bin/show_pathway?mmu05412/mmu:16421%09red/mmu:241226%09red/mmu:16404%09red/mmu:109700%09red/mmu:16398%09red
Adherens junction	KEGG PATHWAY	mmu04520	5	75	0.264795	0.41337	ENSMUSG00000027540|ENSMUSG00000033220|ENSMUSG00000025314|ENSMUSG00000031565|ENSMUSG00000022676	http://www.genome.jp/kegg-bin/show_pathway?mmu04520/mmu:20583%09red/mmu:19246%09red/mmu:19271%09red/mmu:19354%09red/mmu:14182%09red
Caffeine metabolism	KEGG PATHWAY	mmu00232	1	6	0.266295	0.41337	ENSMUSG00000024066	http://www.genome.jp/kegg-bin/show_pathway?mmu00232/mmu:22436%09red
Carbon metabolism	KEGG PATHWAY	mmu01200	7	116	0.28357	0.436221	ENSMUSG00000025877|ENSMUSG00000025190|ENSMUSG00000063524|ENSMUSG00000000628|ENSMUSG00000057666|ENSMUSG00000021996|ENSMUSG00000032294	http://www.genome.jp/kegg-bin/show_pathway?mmu01200/mmu:14718%09red/mmu:212032%09red/mmu:18746%09red/mmu:13806%09red/mmu:13885%09red/mmu:15277%09red/mmu:14433%09red
Thyroid hormone signaling pathway	KEGG PATHWAY	mmu04919	7	117	0.290405	0.438276	ENSMUSG00000018076|ENSMUSG00000026576|ENSMUSG00000022346|ENSMUSG00000020901|ENSMUSG00000007682|ENSMUSG00000019768|ENSMUSG00000028645	http://www.genome.jp/kegg-bin/show_pathway?mmu04919/mmu:13371%09red/mmu:20525%09red/mmu:320207%09red/mmu:17869%09red/mmu:13982%09red/mmu:76199%09red/mmu:11931%09red
RNA degradation	KEGG PATHWAY	mmu03018	5	79	0.298407	0.438342	ENSMUSG00000090919|ENSMUSG00000048546|ENSMUSG00000054582|ENSMUSG00000063524|ENSMUSG00000036478	http://www.genome.jp/kegg-bin/show_pathway?mmu03018/mmu:241989%09red/mmu:381404%09red/mmu:57259%09red/mmu:12226%09red/mmu:13806%09red
Tight junction	KEGG PATHWAY	mmu04530	8	140	0.310932	0.453753	ENSMUSG00000044641|ENSMUSG00000068270|ENSMUSG00000047230|ENSMUSG00000022831|ENSMUSG00000029120|ENSMUSG00000024091|ENSMUSG00000070473|ENSMUSG00000047501	http://www.genome.jp/kegg-bin/show_pathway?mmu04530/mmu:12739%09red/mmu:12738%09red/mmu:208431%09red/mmu:30960%09red/mmu:15163%09red/mmu:58220%09red/mmu:269643%09red/mmu:12740%09red
Phenylalanine, tyrosine and tryptophan biosynthesis	KEGG PATHWAY	mmu00400	1	8	0.328429	0.46341	ENSMUSG00000025190	http://www.genome.jp/kegg-bin/show_pathway?mmu00400/mmu:14718%09red
Neurotrophin signaling pathway	KEGG PATHWAY	mmu04722	7	123	0.332107	0.468364	ENSMUSG00000048756|ENSMUSG00000020901|ENSMUSG00000004864|ENSMUSG00000016528|ENSMUSG00000021025|ENSMUSG00000020227|ENSMUSG00000055254	http://www.genome.jp/kegg-bin/show_pathway?mmu04722/mmu:73914%09red/mmu:26415%09red/mmu:17164%09red/mmu:18212%09red/mmu:320207%09red/mmu:18035%09red/mmu:56484%09red
Ether lipid metabolism	KEGG PATHWAY	mmu00565	3	44	0.33255	0.468593	ENSMUSG00000023913|ENSMUSG00000033192|ENSMUSG00000027999	http://www.genome.jp/kegg-bin/show_pathway?mmu00565/mmu:66350%09red/mmu:27226%09red/mmu:270084%09red
Longevity regulating pathway - multiple species	KEGG PATHWAY	mmu04213	4	64	0.33944	0.477498	ENSMUSG00000020053|ENSMUSG00000020901|ENSMUSG00000048756|ENSMUSG00000038894	http://www.genome.jp/kegg-bin/show_pathway?mmu04213/mmu:320207%09red/mmu:16000%09red/mmu:384783%09red/mmu:56484%09red
Colorectal cancer	KEGG PATHWAY	mmu05210	4	64	0.33944	0.477498	ENSMUSG00000020901|ENSMUSG00000033220|ENSMUSG00000021250|ENSMUSG00000022346	http://www.genome.jp/kegg-bin/show_pathway?mmu05210/mmu:320207%09red/mmu:19354%09red/mmu:17869%09red/mmu:14281%09red
Dorso-ventral axis formation	KEGG PATHWAY	mmu04320	2	26	0.343198	0.480524	ENSMUSG00000033644|ENSMUSG00000039782	http://www.genome.jp/kegg-bin/show_pathway?mmu04320/mmu:231207%09red/mmu:57746%09red
Inflammatory mediator regulation of TRP channels	KEGG PATHWAY	mmu04750	7	125	0.346209	0.482697	ENSMUSG00000020053|ENSMUSG00000020623|ENSMUSG00000020901|ENSMUSG00000032860|ENSMUSG00000004864|ENSMUSG00000015224|ENSMUSG00000027398	http://www.genome.jp/kegg-bin/show_pathway?mmu04750/mmu:26415%09red/mmu:16000%09red/mmu:26399%09red/mmu:320207%09red/mmu:16176%09red/mmu:18442%09red/mmu:74519%09red
Glioma	KEGG PATHWAY	mmu05214	4	65	0.349361	0.482697	ENSMUSG00000020053|ENSMUSG00000020901|ENSMUSG00000023067|ENSMUSG00000025856	http://www.genome.jp/kegg-bin/show_pathway?mmu05214/mmu:320207%09red/mmu:16000%09red/mmu:12575%09red/mmu:18590%09red
Insulin secretion	KEGG PATHWAY	mmu04911	5	85	0.349907	0.482697	ENSMUSG00000026576|ENSMUSG00000044453|ENSMUSG00000061601|ENSMUSG00000024027|ENSMUSG00000028645	http://www.genome.jp/kegg-bin/show_pathway?mmu04911/mmu:233081%09red/mmu:14652%09red/mmu:20525%09red/mmu:26875%09red/mmu:11931%09red
Collecting duct acid secretion	KEGG PATHWAY	mmu04966	2	27	0.359087	0.483675	ENSMUSG00000006574|ENSMUSG00000024121	http://www.genome.jp/kegg-bin/show_pathway?mmu04966/mmu:20533%09red/mmu:11984%09red
Pancreatic cancer	KEGG PATHWAY	mmu05212	4	66	0.359285	0.483787	ENSMUSG00000020901|ENSMUSG00000033220|ENSMUSG00000004040|ENSMUSG00000007659	http://www.genome.jp/kegg-bin/show_pathway?mmu05212/mmu:19354%09red/mmu:320207%09red/mmu:12048%09red/mmu:20848%09red
Metabolism of xenobiotics by cytochrome P450	KEGG PATHWAY	mmu00980	4	66	0.359285	0.483787	ENSMUSG00000032315|ENSMUSG00000024087|ENSMUSG00000074207|ENSMUSG00000055301	http://www.genome.jp/kegg-bin/show_pathway?mmu00980/mmu:11529%09red/mmu:13076%09red/mmu:13078%09red/mmu:11522%09red
Taste transduction	KEGG PATHWAY	mmu04742	5	87	0.367211	0.494061	ENSMUSG00000023243|ENSMUSG00000057182|ENSMUSG00000022489|ENSMUSG00000056203|ENSMUSG00000030340	http://www.genome.jp/kegg-bin/show_pathway?mmu04742/mmu:20276%09red/mmu:387512%09red/mmu:18574%09red/mmu:16529%09red/mmu:20269%09red
Dopaminergic synapse	KEGG PATHWAY	mmu04728	7	129	0.374591	0.502216	ENSMUSG00000032766|ENSMUSG00000029120|ENSMUSG00000021250|ENSMUSG00000004864|ENSMUSG00000025037|ENSMUSG00000055116|ENSMUSG00000060216	http://www.genome.jp/kegg-bin/show_pathway?mmu04728/mmu:26415%09red/mmu:216869%09red/mmu:17161%09red/mmu:66066%09red/mmu:14281%09red/mmu:269643%09red/mmu:11865%09red
ErbB signaling pathway	KEGG PATHWAY	mmu04012	5	88	0.375869	0.503444	ENSMUSG00000020901|ENSMUSG00000023067|ENSMUSG00000031490|ENSMUSG00000018166|ENSMUSG00000022346	http://www.genome.jp/kegg-bin/show_pathway?mmu04012/mmu:13685%09red/mmu:13867%09red/mmu:320207%09red/mmu:17869%09red/mmu:12575%09red
Drug metabolism - cytochrome P450	KEGG PATHWAY	mmu00982	4	68	0.379115	0.505091	ENSMUSG00000055301|ENSMUSG00000074207|ENSMUSG00000025037|ENSMUSG00000040181	http://www.genome.jp/kegg-bin/show_pathway?mmu00982/mmu:11529%09red/mmu:11522%09red/mmu:14261%09red/mmu:17161%09red
cGMP-PKG signaling pathway	KEGG PATHWAY	mmu04022	9	172	0.383243	0.505091	ENSMUSG00000026576|ENSMUSG00000031489|ENSMUSG00000020901|ENSMUSG00000045730|ENSMUSG00000050511|ENSMUSG00000038894|ENSMUSG00000044951|ENSMUSG00000005583|ENSMUSG00000053965	http://www.genome.jp/kegg-bin/show_pathway?mmu04022/mmu:17260%09red/mmu:18386%09red/mmu:238564%09red/mmu:11555%09red/mmu:11556%09red/mmu:320207%09red/mmu:242202%09red/mmu:384783%09red/mmu:11931%09red
Arachidonic acid metabolism	KEGG PATHWAY	mmu00590	5	89	0.384524	0.505091	ENSMUSG00000015224|ENSMUSG00000030483|ENSMUSG00000003484|ENSMUSG00000027999|ENSMUSG00000047250	http://www.genome.jp/kegg-bin/show_pathway?mmu00590/mmu:66350%09red/mmu:13088%09red/mmu:72054%09red/mmu:74519%09red/mmu:19224%09red
Progesterone-mediated oocyte maturation	KEGG PATHWAY	mmu04914	5	89	0.384524	0.505091	ENSMUSG00000020053|ENSMUSG00000020901|ENSMUSG00000031870|ENSMUSG00000004864|ENSMUSG00000039782	http://www.genome.jp/kegg-bin/show_pathway?mmu04914/mmu:320207%09red/mmu:231207%09red/mmu:16000%09red/mmu:26415%09red/mmu:18667%09red
Sulfur relay system	KEGG PATHWAY	mmu04122	1	10	0.385305	0.505091	ENSMUSG00000064120	http://www.genome.jp/kegg-bin/show_pathway?mmu04122/mmu:56738%09red
Endocytosis	KEGG PATHWAY	mmu04144	14	278	0.385575	0.505365	ENSMUSG00000044641|ENSMUSG00000026180|ENSMUSG00000051343|ENSMUSG00000031489|ENSMUSG00000053835|ENSMUSG00000054252|ENSMUSG00000018166|ENSMUSG00000045730|ENSMUSG00000024589|ENSMUSG00000067235|ENSMUSG00000017132|ENSMUSG00000005320|ENSMUSG00000060216|ENSMUSG00000062960	http://www.genome.jp/kegg-bin/show_pathway?mmu04144/mmu:14184%09red/mmu:13867%09red/mmu:14186%09red/mmu:216869%09red/mmu:16542%09red/mmu:15007%09red/mmu:11556%09red/mmu:83814%09red/mmu:19157%09red/mmu:15042%09red/mmu:58220%09red/mmu:12765%09red/mmu:11555%09red/mmu:52055%09red
Morphine addiction	KEGG PATHWAY	mmu05032	5	91	0.401813	0.522934	ENSMUSG00000032766|ENSMUSG00000022489|ENSMUSG00000028525|ENSMUSG00000060216|ENSMUSG00000031842	http://www.genome.jp/kegg-bin/show_pathway?mmu05032/mmu:66066%09red/mmu:18578%09red/mmu:216869%09red/mmu:110385%09red/mmu:18574%09red
mRNA surveillance pathway	KEGG PATHWAY	mmu03015	5	92	0.410439	0.522934	ENSMUSG00000029120|ENSMUSG00000069565|ENSMUSG00000054582|ENSMUSG00000090919|ENSMUSG00000022774	http://www.genome.jp/kegg-bin/show_pathway?mmu03015/mmu:241989%09red/mmu:70248%09red/mmu:68092%09red/mmu:381404%09red/mmu:269643%09red
Other types of O-glycan biosynthesis	KEGG PATHWAY	mmu00514	2	31	0.421038	0.533064	ENSMUSG00000032649|ENSMUSG00000030074	http://www.genome.jp/kegg-bin/show_pathway?mmu00514/mmu:269132%09red/mmu:232313%09red
Lysine degradation	KEGG PATHWAY	mmu00310	3	52	0.427248	0.540192	ENSMUSG00000032649|ENSMUSG00000035878|ENSMUSG00000029695	http://www.genome.jp/kegg-bin/show_pathway?mmu00310/mmu:30956%09red/mmu:269132%09red/mmu:235386%09red
Drug metabolism - other enzymes	KEGG PATHWAY	mmu00983	3	52	0.427248	0.540192	ENSMUSG00000024066|ENSMUSG00000031877|ENSMUSG00000050097	http://www.genome.jp/kegg-bin/show_pathway?mmu00983/mmu:234669%09red/mmu:22436%09red/mmu:72361%09red
Endometrial cancer	KEGG PATHWAY	mmu05213	3	52	0.427248	0.540192	ENSMUSG00000020901|ENSMUSG00000048756|ENSMUSG00000022346	http://www.genome.jp/kegg-bin/show_pathway?mmu05213/mmu:320207%09red/mmu:17869%09red/mmu:56484%09red
Glycerophospholipid metabolism	KEGG PATHWAY	mmu00564	5	94	0.427632	0.540513	ENSMUSG00000036095|ENSMUSG00000033192|ENSMUSG00000020593|ENSMUSG00000027999|ENSMUSG00000024052	http://www.genome.jp/kegg-bin/show_pathway?mmu00564/mmu:66350%09red/mmu:64898%09red/mmu:270084%09red/mmu:14245%09red/mmu:217480%09red
Chemical carcinogenesis	KEGG PATHWAY	mmu05204	5	94	0.427632	0.540513	ENSMUSG00000032315|ENSMUSG00000024087|ENSMUSG00000074207|ENSMUSG00000030483|ENSMUSG00000055301	http://www.genome.jp/kegg-bin/show_pathway?mmu05204/mmu:11529%09red/mmu:13088%09red/mmu:13076%09red/mmu:13078%09red/mmu:11522%09red
Gastric acid secretion	KEGG PATHWAY	mmu04971	4	73	0.428308	0.540959	ENSMUSG00000044951|ENSMUSG00000052397|ENSMUSG00000026576|ENSMUSG00000041695	http://www.genome.jp/kegg-bin/show_pathway?mmu04971/mmu:22350%09red/mmu:11931%09red/mmu:16518%09red/mmu:238564%09red
Circadian entrainment	KEGG PATHWAY	mmu04713	5	96	0.444723	0.551212	ENSMUSG00000032766|ENSMUSG00000020893|ENSMUSG00000021250|ENSMUSG00000049892|ENSMUSG00000022416	http://www.genome.jp/kegg-bin/show_pathway?mmu04713/mmu:66066%09red/mmu:239556%09red/mmu:19416%09red/mmu:14281%09red/mmu:18626%09red
Estrogen signaling pathway	KEGG PATHWAY	mmu04915	5	97	0.453223	0.559509	ENSMUSG00000020901|ENSMUSG00000024222|ENSMUSG00000021250|ENSMUSG00000017737|ENSMUSG00000019768	http://www.genome.jp/kegg-bin/show_pathway?mmu04915/mmu:14229%09red/mmu:320207%09red/mmu:13982%09red/mmu:17395%09red/mmu:14281%09red
Basal cell carcinoma	KEGG PATHWAY	mmu05217	3	55	0.461624	0.56172	ENSMUSG00000064325|ENSMUSG00000050288|ENSMUSG00000022996	http://www.genome.jp/kegg-bin/show_pathway?mmu05217/mmu:57265%09red/mmu:22410%09red/mmu:15245%09red
Starch and sucrose metabolism	KEGG PATHWAY	mmu00500	3	55	0.461624	0.56172	ENSMUSG00000021069|ENSMUSG00000025877|ENSMUSG00000000628	http://www.genome.jp/kegg-bin/show_pathway?mmu00500/mmu:110095%09red/mmu:212032%09red/mmu:15277%09red
Alzheimer's disease	KEGG PATHWAY	mmu05010	8	163	0.461921	0.561796	ENSMUSG00000030785|ENSMUSG00000002985|ENSMUSG00000024401|ENSMUSG00000057666|ENSMUSG00000027398|ENSMUSG00000015568|ENSMUSG00000040605|ENSMUSG00000024778	http://www.genome.jp/kegg-bin/show_pathway?mmu05010/mmu:56175%09red/mmu:12862%09red/mmu:11816%09red/mmu:16956%09red/mmu:16176%09red/mmu:14433%09red/mmu:21926%09red/mmu:14102%09red
Salivary secretion	KEGG PATHWAY	mmu04970	4	77	0.466915	0.567045	ENSMUSG00000069515|ENSMUSG00000045730|ENSMUSG00000026576|ENSMUSG00000031489	http://www.genome.jp/kegg-bin/show_pathway?mmu04970/mmu:11555%09red/mmu:11556%09red/mmu:17110%09red/mmu:11931%09red
Pyrimidine metabolism	KEGG PATHWAY	mmu00240	5	101	0.486831	0.58403	ENSMUSG00000048120|ENSMUSG00000041608|ENSMUSG00000028633|ENSMUSG00000020250|ENSMUSG00000020638	http://www.genome.jp/kegg-bin/show_pathway?mmu00240/mmu:50493%09red/mmu:22169%09red/mmu:215446%09red/mmu:51797%09red/mmu:12495%09red
Glycosaminoglycan biosynthesis - keratan sulfate	KEGG PATHWAY	mmu00533	1	15	0.50732	0.59931	ENSMUSG00000033350	http://www.genome.jp/kegg-bin/show_pathway?mmu00533/mmu:54371%09red
Glycosphingolipid biosynthesis - globo series	KEGG PATHWAY	mmu00603	1	15	0.50732	0.59931	ENSMUSG00000031266	http://www.genome.jp/kegg-bin/show_pathway?mmu00603/mmu:11605%09red
Peroxisome	KEGG PATHWAY	mmu04146	4	83	0.522904	0.615831	ENSMUSG00000024066|ENSMUSG00000027952|ENSMUSG00000020826|ENSMUSG00000024953	http://www.genome.jp/kegg-bin/show_pathway?mmu04146/mmu:54683%09red/mmu:22436%09red/mmu:18126%09red/mmu:68603%09red
Primary bile acid biosynthesis	KEGG PATHWAY	mmu00120	1	16	0.52865	0.617558	ENSMUSG00000050370	http://www.genome.jp/kegg-bin/show_pathway?mmu00120/mmu:12642%09red
PPAR signaling pathway	KEGG PATHWAY	mmu03320	4	85	0.540938	0.629715	ENSMUSG00000022878|ENSMUSG00000027533|ENSMUSG00000015568|ENSMUSG00000002289	http://www.genome.jp/kegg-bin/show_pathway?mmu03320/mmu:57875%09red/mmu:11450%09red/mmu:16956%09red/mmu:16592%09red
Selenocompound metabolism	KEGG PATHWAY	mmu00450	1	17	0.549058	0.633965	ENSMUSG00000020250	http://www.genome.jp/kegg-bin/show_pathway?mmu00450/mmu:50493%09red
Gap junction	KEGG PATHWAY	mmu04540	4	86	0.549823	0.634586	ENSMUSG00000062591|ENSMUSG00000043091|ENSMUSG00000025856|ENSMUSG00000001473	http://www.genome.jp/kegg-bin/show_pathway?mmu04540/mmu:67951%09red/mmu:18590%09red/mmu:22153%09red/mmu:22146%09red
GABAergic synapse	KEGG PATHWAY	mmu04727	4	87	0.558617	0.643789	ENSMUSG00000032766|ENSMUSG00000026473|ENSMUSG00000022462|ENSMUSG00000031170	http://www.genome.jp/kegg-bin/show_pathway?mmu04727/mmu:66066%09red/mmu:14645%09red/mmu:67760%09red/mmu:209837%09red
Oxytocin signaling pathway	KEGG PATHWAY	mmu04921	7	157	0.568528	0.649166	ENSMUSG00000020901|ENSMUSG00000021250|ENSMUSG00000023067|ENSMUSG00000009292|ENSMUSG00000041695|ENSMUSG00000044951|ENSMUSG00000005583	http://www.genome.jp/kegg-bin/show_pathway?mmu04921/mmu:17260%09red/mmu:12575%09red/mmu:238564%09red/mmu:320207%09red/mmu:16518%09red/mmu:14281%09red/mmu:28240%09red
Renal cell carcinoma	KEGG PATHWAY	mmu05211	3	66	0.578733	0.658867	ENSMUSG00000020901|ENSMUSG00000035105|ENSMUSG00000028645	http://www.genome.jp/kegg-bin/show_pathway?mmu05211/mmu:112407%09red/mmu:320207%09red/mmu:20525%09red
Steroid biosynthesis	KEGG PATHWAY	mmu00100	1	19	0.587262	0.663613	ENSMUSG00000023045	http://www.genome.jp/kegg-bin/show_pathway?mmu00100/mmu:223920%09red
Ubiquitin mediated proteolysis	KEGG PATHWAY	mmu04120	6	137	0.588486	0.664899	ENSMUSG00000032596|ENSMUSG00000032000|ENSMUSG00000024589|ENSMUSG00000053113|ENSMUSG00000041556|ENSMUSG00000022184	http://www.genome.jp/kegg-bin/show_pathway?mmu04120/mmu:11796%09red/mmu:106052%09red/mmu:12702%09red/mmu:74153%09red/mmu:230904%09red/mmu:83814%09red
Hedgehog signaling pathway	KEGG PATHWAY	mmu04340	2	44	0.597544	0.67414	ENSMUSG00000060216|ENSMUSG00000064325	http://www.genome.jp/kegg-bin/show_pathway?mmu04340/mmu:216869%09red/mmu:15245%09red
Glycosaminoglycan biosynthesis - chondroitin sulfate / dermatan sulfate	KEGG PATHWAY	mmu00532	1	20	0.605134	0.678586	ENSMUSG00000030657	http://www.genome.jp/kegg-bin/show_pathway?mmu00532/mmu:233781%09red
2-Oxocarboxylic acid metabolism	KEGG PATHWAY	mmu01210	1	20	0.605134	0.678586	ENSMUSG00000025190	http://www.genome.jp/kegg-bin/show_pathway?mmu01210/mmu:14718%09red
Thyroid hormone synthesis	KEGG PATHWAY	mmu04918	3	70	0.617138	0.69103	ENSMUSG00000020651|ENSMUSG00000031584|ENSMUSG00000026576	http://www.genome.jp/kegg-bin/show_pathway?mmu04918/mmu:14782%09red/mmu:23985%09red/mmu:11931%09red
Cysteine and methionine metabolism	KEGG PATHWAY	mmu00270	2	47	0.632084	0.702782	ENSMUSG00000037798|ENSMUSG00000025190	http://www.genome.jp/kegg-bin/show_pathway?mmu00270/mmu:14718%09red/mmu:11720%09red
Proximal tubule bicarbonate reclamation	KEGG PATHWAY	mmu04964	1	22	0.638591	0.706638	ENSMUSG00000026576	http://www.genome.jp/kegg-bin/show_pathway?mmu04964/mmu:11931%09red
Terpenoid backbone biosynthesis	KEGG PATHWAY	mmu00900	1	22	0.638591	0.706638	ENSMUSG00000027952	http://www.genome.jp/kegg-bin/show_pathway?mmu00900/mmu:68603%09red
Phosphatidylinositol signaling system	KEGG PATHWAY	mmu04070	4	98	0.648763	0.716851	ENSMUSG00000026288|ENSMUSG00000020901|ENSMUSG00000024210|ENSMUSG00000036095	http://www.genome.jp/kegg-bin/show_pathway?mmu04070/mmu:16331%09red/mmu:271424%09red/mmu:320207%09red/mmu:217480%09red
Notch signaling pathway	KEGG PATHWAY	mmu04330	2	49	0.653796	0.720148	ENSMUSG00000014773|ENSMUSG00000027314	http://www.genome.jp/kegg-bin/show_pathway?mmu04330/mmu:54485%09red/mmu:13388%09red
N-Glycan biosynthesis	KEGG PATHWAY	mmu00510	2	49	0.653796	0.720148	ENSMUSG00000032437|ENSMUSG00000073792	http://www.genome.jp/kegg-bin/show_pathway?mmu00510/mmu:68292%09red/mmu:320438%09red
Fatty acid degradation	KEGG PATHWAY	mmu00071	2	49	0.653796	0.720148	ENSMUSG00000074207|ENSMUSG00000055301	http://www.genome.jp/kegg-bin/show_pathway?mmu00071/mmu:11529%09red/mmu:11522%09red
Adrenergic signaling in cardiomyocytes	KEGG PATHWAY	mmu04261	6	148	0.66006	0.726266	ENSMUSG00000026576|ENSMUSG00000029120|ENSMUSG00000045730|ENSMUSG00000004864|ENSMUSG00000020901|ENSMUSG00000034810	http://www.genome.jp/kegg-bin/show_pathway?mmu04261/mmu:26415%09red/mmu:11555%09red/mmu:320207%09red/mmu:20272%09red/mmu:269643%09red/mmu:11931%09red
Glucagon signaling pathway	KEGG PATHWAY	mmu04922	4	100	0.66377	0.729772	ENSMUSG00000021069|ENSMUSG00000024042|ENSMUSG00000032294|ENSMUSG00000028645	http://www.genome.jp/kegg-bin/show_pathway?mmu04922/mmu:17691%09red/mmu:110095%09red/mmu:20525%09red/mmu:18746%09red
Melanogenesis	KEGG PATHWAY	mmu04916	4	100	0.66377	0.729772	ENSMUSG00000021367|ENSMUSG00000050288|ENSMUSG00000022996|ENSMUSG00000019966	http://www.genome.jp/kegg-bin/show_pathway?mmu04916/mmu:17311%09red/mmu:13614%09red/mmu:22410%09red/mmu:57265%09red
Linoleic acid metabolism	KEGG PATHWAY	mmu00591	2	50	0.664263	0.730026	ENSMUSG00000015224|ENSMUSG00000027999	http://www.genome.jp/kegg-bin/show_pathway?mmu00591/mmu:66350%09red/mmu:74519%09red
Glycosaminoglycan biosynthesis - heparan sulfate / heparin	KEGG PATHWAY	mmu00534	1	24	0.669216	0.732872	ENSMUSG00000030657	http://www.genome.jp/kegg-bin/show_pathway?mmu00534/mmu:233781%09red
alpha-Linolenic acid metabolism	KEGG PATHWAY	mmu00592	1	25	0.683542	0.74476	ENSMUSG00000027999	http://www.genome.jp/kegg-bin/show_pathway?mmu00592/mmu:66350%09red
Glycosphingolipid biosynthesis - lacto and neolacto series	KEGG PATHWAY	mmu00601	1	25	0.683542	0.74476	ENSMUSG00000021360	http://www.genome.jp/kegg-bin/show_pathway?mmu00601/mmu:14538%09red
Bacterial invasion of epithelial cells	KEGG PATHWAY	mmu05100	3	78	0.686576	0.747288	ENSMUSG00000020901|ENSMUSG00000050379|ENSMUSG00000022831	http://www.genome.jp/kegg-bin/show_pathway?mmu05100/mmu:320207%09red/mmu:56526%09red/mmu:15163%09red
Phototransduction	KEGG PATHWAY	mmu04744	1	26	0.697248	0.754098	ENSMUSG00000034452	http://www.genome.jp/kegg-bin/show_pathway?mmu04744/mmu:214111%09red
Endocrine and other factor-regulated calcium reabsorption	KEGG PATHWAY	mmu04961	2	54	0.703591	0.76027	ENSMUSG00000026576|ENSMUSG00000019768	http://www.genome.jp/kegg-bin/show_pathway?mmu04961/mmu:13982%09red/mmu:11931%09red
Serotonergic synapse	KEGG PATHWAY	mmu04726	5	131	0.705643	0.762291	ENSMUSG00000032766|ENSMUSG00000015224|ENSMUSG00000047250|ENSMUSG00000025037|ENSMUSG00000024190	http://www.genome.jp/kegg-bin/show_pathway?mmu04726/mmu:66066%09red/mmu:19252%09red/mmu:74519%09red/mmu:19224%09red/mmu:17161%09red
Hippo signaling pathway -multiple species	KEGG PATHWAY	mmu04392	1	27	0.710361	0.763349	ENSMUSG00000027339	http://www.genome.jp/kegg-bin/show_pathway?mmu04392/mmu:215653%09red
Protein export	KEGG PATHWAY	mmu03060	1	27	0.710361	0.763349	ENSMUSG00000048040	http://www.genome.jp/kegg-bin/show_pathway?mmu03060/mmu:76976%09red
Non-small cell lung cancer	KEGG PATHWAY	mmu05223	2	56	0.721773	0.772664	ENSMUSG00000020901|ENSMUSG00000048756	http://www.genome.jp/kegg-bin/show_pathway?mmu05223/mmu:320207%09red/mmu:56484%09red
Glyoxylate and dicarboxylate metabolism	KEGG PATHWAY	mmu00630	1	29	0.734909	0.782325	ENSMUSG00000026473	http://www.genome.jp/kegg-bin/show_pathway?mmu00630/mmu:14645%09red
Thyroid cancer	KEGG PATHWAY	mmu05216	1	29	0.734909	0.782325	ENSMUSG00000022346	http://www.genome.jp/kegg-bin/show_pathway?mmu05216/mmu:17869%09red
Mucin type O-Glycan biosynthesis	KEGG PATHWAY	mmu00512	1	29	0.734909	0.782325	ENSMUSG00000021903	http://www.genome.jp/kegg-bin/show_pathway?mmu00512/mmu:78754%09red
Cholinergic synapse	KEGG PATHWAY	mmu04725	4	111	0.738352	0.785561	ENSMUSG00000032766|ENSMUSG00000041695|ENSMUSG00000020901|ENSMUSG00000021250	http://www.genome.jp/kegg-bin/show_pathway?mmu04725/mmu:66066%09red/mmu:320207%09red/mmu:16518%09red/mmu:14281%09red
Aldosterone synthesis and secretion	KEGG PATHWAY	mmu04925	3	85	0.739221	0.786186	ENSMUSG00000037936|ENSMUSG00000023034|ENSMUSG00000022416	http://www.genome.jp/kegg-bin/show_pathway?mmu04925/mmu:20778%09red/mmu:15370%09red/mmu:239556%09red
Oocyte meiosis	KEGG PATHWAY	mmu04114	4	113	0.750471	0.795421	ENSMUSG00000020053|ENSMUSG00000031870|ENSMUSG00000046532|ENSMUSG00000039782	http://www.genome.jp/kegg-bin/show_pathway?mmu04114/mmu:18667%09red/mmu:11835%09red/mmu:16000%09red/mmu:231207%09red
Steroid hormone biosynthesis	KEGG PATHWAY	mmu00140	3	87	0.752908	0.7976	ENSMUSG00000032315|ENSMUSG00000024087|ENSMUSG00000030483	http://www.genome.jp/kegg-bin/show_pathway?mmu00140/mmu:13088%09red/mmu:13076%09red/mmu:13078%09red
GnRH signaling pathway	KEGG PATHWAY	mmu04912	3	89	0.76601	0.808921	ENSMUSG00000004864|ENSMUSG00000020623|ENSMUSG00000000957	http://www.genome.jp/kegg-bin/show_pathway?mmu04912/mmu:17387%09red/mmu:26399%09red/mmu:26415%09red
Renin-angiotensin system	KEGG PATHWAY	mmu04614	1	34	0.787565	0.826159	ENSMUSG00000031980	http://www.genome.jp/kegg-bin/show_pathway?mmu04614/mmu:11606%09red
Nicotinate and nicotinamide metabolism	KEGG PATHWAY	mmu00760	1	35	0.796769	0.833933	ENSMUSG00000020572	http://www.genome.jp/kegg-bin/show_pathway?mmu00760/mmu:59027%09red
Amphetamine addiction	KEGG PATHWAY	mmu05031	2	66	0.799056	0.835699	ENSMUSG00000021250|ENSMUSG00000025037	http://www.genome.jp/kegg-bin/show_pathway?mmu05031/mmu:14281%09red/mmu:17161%09red
Pentose and glucuronate interconversions	KEGG PATHWAY	mmu00040	1	37	0.813999	0.848571	ENSMUSG00000029762	http://www.genome.jp/kegg-bin/show_pathway?mmu00040/mmu:14187%09red
Vascular smooth muscle contraction	KEGG PATHWAY	mmu04270	4	127	0.823476	0.857382	ENSMUSG00000044951|ENSMUSG00000059588|ENSMUSG00000027999|ENSMUSG00000041046	http://www.genome.jp/kegg-bin/show_pathway?mmu04270/mmu:66350%09red/mmu:54598%09red/mmu:56089%09red/mmu:238564%09red
Pyruvate metabolism	KEGG PATHWAY	mmu00620	1	39	0.82977	0.862647	ENSMUSG00000032294	http://www.genome.jp/kegg-bin/show_pathway?mmu00620/mmu:18746%09red
Glycine, serine and threonine metabolism	KEGG PATHWAY	mmu00260	1	40	0.837147	0.86859	ENSMUSG00000025037	http://www.genome.jp/kegg-bin/show_pathway?mmu00260/mmu:17161%09red
Pancreatic secretion	KEGG PATHWAY	mmu04972	3	102	0.837895	0.869151	ENSMUSG00000026576|ENSMUSG00000027999|ENSMUSG00000056025	http://www.genome.jp/kegg-bin/show_pathway?mmu04972/mmu:12722%09red/mmu:66350%09red/mmu:11931%09red
Cardiac muscle contraction	KEGG PATHWAY	mmu04260	2	74	0.846527	0.875934	ENSMUSG00000030785|ENSMUSG00000026576	http://www.genome.jp/kegg-bin/show_pathway?mmu04260/mmu:11931%09red/mmu:12862%09red
Porphyrin and chlorophyll metabolism	KEGG PATHWAY	mmu00860	1	42	0.850956	0.879538	ENSMUSG00000005413	http://www.genome.jp/kegg-bin/show_pathway?mmu00860/mmu:15368%09red
Protein processing in endoplasmic reticulum	KEGG PATHWAY	mmu04141	5	163	0.856826	0.884732	ENSMUSG00000046841|ENSMUSG00000031770|ENSMUSG00000041556|ENSMUSG00000074093|ENSMUSG00000032437	http://www.genome.jp/kegg-bin/show_pathway?mmu04141/mmu:64209%09red/mmu:75744%09red/mmu:216197%09red/mmu:230904%09red/mmu:68292%09red
Aminoacyl-tRNA biosynthesis	KEGG PATHWAY	mmu00970	1	44	0.863596	0.890403	ENSMUSG00000035202	http://www.genome.jp/kegg-bin/show_pathway?mmu00970/mmu:102436%09red
RNA transport	KEGG PATHWAY	mmu03013	5	166	0.866921	0.893282	ENSMUSG00000090919|ENSMUSG00000054582|ENSMUSG00000030091|ENSMUSG00000022774|ENSMUSG00000031490	http://www.genome.jp/kegg-bin/show_pathway?mmu03013/mmu:241989%09red/mmu:54563%09red/mmu:381404%09red/mmu:13685%09red/mmu:68092%09red
Proteasome	KEGG PATHWAY	mmu03050	1	45	0.869508	0.894846	ENSMUSG00000030591	http://www.genome.jp/kegg-bin/show_pathway?mmu03050/mmu:57296%09red
Glutamatergic synapse	KEGG PATHWAY	mmu04724	3	113	0.882988	0.906712	ENSMUSG00000032766|ENSMUSG00000026473|ENSMUSG00000022462	http://www.genome.jp/kegg-bin/show_pathway?mmu04724/mmu:66066%09red/mmu:14645%09red/mmu:67760%09red
Cocaine addiction	KEGG PATHWAY	mmu05030	1	48	0.885752	0.908881	ENSMUSG00000025037	http://www.genome.jp/kegg-bin/show_pathway?mmu05030/mmu:17161%09red
Fanconi anemia pathway	KEGG PATHWAY	mmu03460	1	52	0.904313	0.924752	ENSMUSG00000047757	http://www.genome.jp/kegg-bin/show_pathway?mmu03460/mmu:237211%09red
Glutathione metabolism	KEGG PATHWAY	mmu00480	1	56	0.91986	0.937672	ENSMUSG00000031584	http://www.genome.jp/kegg-bin/show_pathway?mmu00480/mmu:14782%09red
Long-term depression	KEGG PATHWAY	mmu04730	1	60	0.932883	0.948256	ENSMUSG00000020053	http://www.genome.jp/kegg-bin/show_pathway?mmu04730/mmu:16000%09red
Alcoholism	KEGG PATHWAY	mmu05034	5	194	0.935274	0.948256	ENSMUSG00000032766|ENSMUSG00000060093|ENSMUSG00000069273|ENSMUSG00000025037|ENSMUSG00000055254	http://www.genome.jp/kegg-bin/show_pathway?mmu05034/mmu:66066%09red/mmu:326619%09red/mmu:18212%09red/mmu:319151%09red/mmu:17161%09red
Synaptic vesicle cycle	KEGG PATHWAY	mmu04721	1	62	0.938579	0.949928	ENSMUSG00000024121	http://www.genome.jp/kegg-bin/show_pathway?mmu04721/mmu:11984%09red
Retrograde endocannabinoid signaling	KEGG PATHWAY	mmu04723	2	101	0.940904	0.951934	ENSMUSG00000032766|ENSMUSG00000004864	http://www.genome.jp/kegg-bin/show_pathway?mmu04723/mmu:66066%09red/mmu:26415%09red
Inositol phosphate metabolism	KEGG PATHWAY	mmu00562	1	71	0.958793	0.967113	ENSMUSG00000026288	http://www.genome.jp/kegg-bin/show_pathway?mmu00562/mmu:16331%09red
Oxidative phosphorylation	KEGG PATHWAY	mmu00190	2	120	0.970714	0.97737	ENSMUSG00000030785|ENSMUSG00000024121	http://www.genome.jp/kegg-bin/show_pathway?mmu00190/mmu:12862%09red/mmu:11984%09red
Parkinson's disease	KEGG PATHWAY	mmu05012	2	128	0.978333	0.983621	ENSMUSG00000032596|ENSMUSG00000030785	http://www.genome.jp/kegg-bin/show_pathway?mmu05012/mmu:74153%09red/mmu:12862%09red
Spliceosome	KEGG PATHWAY	mmu03040	1	131	0.997131	0.99928	ENSMUSG00000022774	http://www.genome.jp/kegg-bin/show_pathway?mmu03040/mmu:68092%09red
Huntington's disease	KEGG PATHWAY	mmu05016	2	184	0.997543	0.999574	ENSMUSG00000030785|ENSMUSG00000033826	http://www.genome.jp/kegg-bin/show_pathway?mmu05016/mmu:13417%09red/mmu:12862%09red
Olfactory transduction	KEGG PATHWAY	mmu04740	5	1085	1	1	ENSMUSG00000051359|ENSMUSG00000022489|ENSMUSG00000060216|ENSMUSG00000061039|ENSMUSG00000043383	http://www.genome.jp/kegg-bin/show_pathway?mmu04740/mmu:258708%09red/mmu:258783%09red/mmu:216869%09red/mmu:18574%09red/mmu:52589%09red
