# Supplementary material for: Landscape of transcription and long non-coding RNAs reveals new insights into the inflammatory and fibrotic response following ventilator-induced lung injury
Source: Respir Res. 2018 Jun 22;19:122. doi: 10.1186/s12931-018-0822-z (PMC6013938; doi:10.1186/s12931-018-0822-z)
Supplement: Supplementary file 9 — Table S5. The entire list of DE lncRNAs in the comparisons of each pair. (XLSX 100 kb) [file 12931_2018_822_MOESM9_ESM.xlsx]

## Sheet: 0d Vs Sham
Identification of differentially expressed lncRNAs in the comparison between sham and VILI group on day 0
Transcript ID	Gene ID	Gene symbol	Gene location	VILI day 0 FPKM	Ctrl FPKM	Log2 (Fold Change)	p-value	q-value
LNC_000471	XLOC_040380	-	chr5:75439257-75442288	0.060492	0.557291	-3.20361	0.00395	0.130921
LNC_000241	XLOC_019216	-	chr15:87078434-87091445	0.0961716	0.587117	-2.60996	0.00675	0.190032
ENSMUST00000209170	ENSMUSG00000108872	Dlg2	chr7:90477171-90522791	0.104857	0.531499	-2.34164	0.03215	0.526688
ENSMUST00000204898.1	ENSMUSG00000107899.1	RP23-296J10.10	chr6:136847743-136848249	0.195319	0.92275	-2.24011	0.01955	0.386561
LNC_000045	XLOC_004071	-	chr10:22814845-22817263	0.139177	0.644068	-2.21029	0.0035	0.120485
LNC_000116	XLOC_010561	-	chr12:24685938-24691665	0.193992	0.839363	-2.1133	5e-05	0.00413767
ENSMUST00000214211	ENSMUSG00000111274	RP24-340L11.5	chr9:89638071-89646002	0.196985	0.814505	-2.04784	0.04715	0.653531
ENSMUST00000191701.1	ENSMUSG00000103130.1	F830212C03Rik	chr15:12633061-12635346	0.173047	0.70948	-2.0356	0.002	0.0799322
ENSMUST00000198200.1	ENSMUSG00000104745.1	Gm43073	chr3:97273875-97275064	0.272786	1.01456	-1.89502	0.0048	0.149371
ENSMUST00000209455	ENSMUSG00000110264	E330018M18Rik	chr8:47135650-47163704	0.273206	1.00485	-1.87892	0.00385	0.128912
ENSMUST00000198676.1	ENSMUSG00000106634.1	Gm43042	chr5:59569701-59574242	12.8298	46.774	-1.86621	5e-05	0.00413767
LNC_000459	XLOC_038858	-	chr5:92226678-92256278	0.169007	0.608843	-1.84898	0.02085	0.403445
ENSMUST00000136359.7	ENSMUSG00000000031.15	H19	chr7:142575528-142578143	0.309217	1.00747	-1.70405	0.0018	0.0739304
LNC_000192	XLOC_016050	-	chr14:68461623-68533689	0.471281	1.46356	-1.63482	0.00825	0.218161
ENSMUST00000182127.1	ENSMUSG00000098243.3	Gm4258	chr1:137898597-138000384	1.55332	4.76708	-1.61775	0.00615	0.177643
LNC_000570	XLOC_058669	-	chrX:136041064-136051338	0.328471	0.991779	-1.59425	0.00225	0.0872611
ENSMUST00000148885.7	ENSMUSG00000085936.7	2610307P16Rik	chr13:28460033-28885620	1.80926	5.43061	-1.58571	5e-05	0.00413767
LNC_000553	XLOC_054361	-	chr9:121981605-121997110	0.446495	1.32379	-1.56796	0.0115	0.272804
LNC_000504	XLOC_046654	-	chr7:101547937-101569682	0.453484	1.26851	-1.48401	0.03935	0.590869
ENSMUST00000155622.7	ENSMUSG00000087365.7	C430049B03Rik	chrX:53055045-53057190	2.61735	7.17445	-1.45476	0.0074	0.203005
ENSMUST00000124336.1	ENSMUSG00000087377.1	AV099323	chr2:132253356-132261333	0.267419	0.730066	-1.44892	0.04595	0.643948
LNC_000051	XLOC_004475	-	chr10:69424857-69453014	1.07213	2.92201	-1.44649	5e-05	0.00413767
ENSMUST00000181485.1	ENSMUSG00000097184.1	4632428C04Rik	chr16:30008666-30039923	1.21325	3.28539	-1.43719	0.0216	0.412411
ENSMUST00000210683	ENSMUSG00000092178	Gm45351	chr7:9868879-9876966	0.225615	0.605112	-1.42334	0.0102	0.252105
ENSMUST00000140980.1	ENSMUSG00000038408.13	1700018A04Rik	chr13:31578286-31582513	0.374766	0.964494	-1.36378	0.01235	0.286002
ENSMUST00000180729.1	ENSMUSG00000097884.1	Gm26543	chr10:49099842-49783259	0.728002	1.86998	-1.36101	0.0113	0.269541
LNC_000524	XLOC_051065	-	chr8:91824562-91832686	0.191131	0.481943	-1.3343	0.0043	0.138816
ENSMUST00000131216.7	ENSMUSG00000059027.14	9630013D21Rik	chr4:109652483-109657853	0.369321	0.929138	-1.33102	0.0097	0.244099
ENSMUST00000203781.1	ENSMUSG00000108145.1	RP24-378N16.1	chr6:51694308-51711081	0.204284	0.513447	-1.32964	0.01415	0.312265
ENSMUST00000194534.1	ENSMUSG00000104339.1	C130089K02Rik	chr3:51685906-52105076	1.72068	4.27344	-1.31242	0.017	0.353822
ENSMUST00000192778.1	ENSMUSG00000103114.1	Gm32200	chr1:191436339-191465048	0.736911	1.80385	-1.29151	0.0021	0.0828307
LNC_000439	XLOC_037039	-	chr4:100034364-100042089	0.501502	1.2275	-1.29139	0.01405	0.311216
ENSMUST00000144026.1	ENSMUSG00000072677.4	Sox5it	chr6:144670426-144672720	0.403641	0.965744	-1.25857	0.033	0.534709
ENSMUST00000197067.1	ENSMUSG00000104547.1	Gm43022	chr5:43515537-43618803	1.62793	3.81816	-1.22984	0.02835	0.487435
ENSMUST00000186073.6	ENSMUSG00000074067.9	Gm10619	chr7:73781428-73816431	0.35686	0.834535	-1.22561	0.0071	0.197052
ENSMUST00000181955.1	ENSMUSG00000074415.10	2610203C20Rik	chr9:41376396-41615185	1.59231	3.70857	-1.21974	0.0215	0.411121
ENSMUST00000199503.1	ENSMUSG00000106515.4	Gm30382	chr3:149284417-149445301	1.18611	2.75991	-1.21838	0.01375	0.306969
ENSMUST00000133960.1	ENSMUSG00000085180.1	AI838599	chr4:3246004-3258092	0.428119	0.967148	-1.17572	0.02605	0.462071
ENSMUST00000207061	ENSMUSG00000109394	RP23-54G8.4	chr7:61916399-61928690	1.33207	2.94258	-1.14341	0.00075	0.0382387
ENSMUST00000181274.1	ENSMUSG00000097448.1	Platr22	chr1:136696210-136726142	0.936799	2.05613	-1.13412	0.01155	0.273341
ENSMUST00000148687.1	ENSMUSG00000087088.1	Gm16638	chr7:83584930-83631842	0.524861	1.14659	-1.12734	0.02875	0.491509
LNC_000364	XLOC_030337	-	chr2:147944739-148038270	0.548126	1.19597	-1.1256	0.01435	0.315469
LNC_000083	XLOC_006478	-	chr10:119046244-119076243	0.342119	0.743536	-1.1199	0.0166	0.348398
LNC_000160	XLOC_013400	-	chr13:56346465-56350144	0.264789	0.575404	-1.11974	0.021	0.405356
ENSMUST00000180468.1	ENSMUSG00000097154.2	Gm26510	chr17:70874348-70924996	0.692737	1.49754	-1.11221	0.02895	0.493772
ENSMUST00000180423.5	ENSMUSG00000097339.5	Gm26671	chr3:57612696-57625818	1.43559	3.09041	-1.10615	0.01935	0.383965
LNC_000207	XLOC_017346	-	chr14:100213188-100244821	0.545918	1.17507	-1.106	0.00055	0.0301111
ENSMUST00000196083.1	ENSMUSG00000106241.1	Gm43143	chr5:25687372-25689395	0.376413	0.807318	-1.10082	0.0221	0.417674
ENSMUST00000208822	ENSMUSG00000109321	A330076H08Rik	chr7:61930136-61982358	1.48507	3.18423	-1.10041	0.02495	0.450426
ENSMUST00000205229.1	ENSMUSG00000107676.1	RP23-82I13.10	chr6:88919707-88922637	0.622438	1.31362	-1.07755	0.0118	0.277185
ENSMUST00000181397.1	ENSMUSG00000096975.1	Gm16386	chr17:22784797-22817741	1.26997	2.67779	-1.07624	0.00775	0.209251
LNC_000550	XLOC_053984	-	chr9:94538557-94565344	0.347822	0.729291	-1.06814	0.01025	0.25311
ENSMUST00000181214.2	ENSMUSG00000074415.10	2610203C20Rik	chr9:41376396-41615185	1.38476	2.90126	-1.06704	0.03205	0.525821
ENSMUST00000205047.1	ENSMUSG00000108084.1	RP24-315D19.10	chr6:48860328-48866083	0.31131	0.636461	-1.03172	0.0354	0.556182
ENSMUST00000181574.5	ENSMUSG00000097180.5	2700038G22Rik	chr5:23850596-23855038	0.855905	1.74607	-1.02859	0.02795	0.483182
ENSMUST00000194753.1	ENSMUSG00000103674.1	Gm37699	chr15:85655665-85659003	3.84643	7.80431	-1.02075	0.00025	0.016035
ENSMUST00000194287.1	ENSMUSG00000103160.1	C130012C08Rik	chr14:21992435-21996100	1.15998	2.33787	-1.0111	0.00355	0.121414
ENSMUST00000209685	ENSMUSG00000109674	Gm45470	chr8:27225775-27240332	0.713082	1.4314	-1.00529	0.01455	0.318392
LNC_000238	XLOC_019032	-	chr15:76918137-76924472	0.371298	0.743312	-1.00139	0.00955	0.241251
LNC_000336	XLOC_026411	-	chr19:53441211-53464796	2.25098	1.0683	1.07524	0.01165	0.274783
ENSMUST00000163493.2	ENSMUSG00000091475.2	2810468N07Rik	chr17:25570810-25575043	0.818948	0.381576	1.1018	0.04575	0.642472
ENSMUST00000097531.2	ENSMUSG00000073535.5	Gm5532	chr1:155520172-155527111	1.15184	0.527642	1.12631	0.01755	0.361114
ENSMUST00000209823	ENSMUSG00000110386	Gm42031	chr8:85125871-85132289	14.9623	6.84785	1.12761	5e-05	0.00413767
ENSMUST00000191157.6	ENSMUSG00000101585.6	1600010M07Rik	chr7:109998375-110006646	3.20913	1.43945	1.15667	0.033	0.534709
LNC_000131	XLOC_011140	-	chr12:85454304-85456998	1.24328	0.551256	1.17336	0.01975	0.388815
ENSMUST00000180625.1	ENSMUSG00000097514.1	Gm17619	chr2:170192448-170194053	0.611135	0.269358	1.18196	0.04965	0.672094
LNC_000147	XLOC_012826	-	chr13:5870989-5898113	0.665801	0.291096	1.1936	0.00095	0.0458858
ENSMUST00000156081.1	ENSMUSG00000086320.1	Gm12840	chr4:117700187-117700923	381.588	165.594	1.20437	5e-05	0.00413767
ENSMUST00000130679.1	ENSMUSG00000006462.6	A530013C23Rik	chr2:167691180-167697801	2.50449	1.03353	1.27694	0.0006	0.0322352
ENSMUST00000149206.1	ENSMUSG00000085314.1	Gm14866	chrX:100729941-100740929	1.99003	0.800417	1.31397	0.0416	0.609805
ENSMUST00000180863.1	ENSMUSG00000097815.1	Gm26809	chr6:18844219-18848207	129.337	51.8596	1.31846	5e-05	0.00413767
ENSMUST00000209966	ENSMUSG00000109827	Gm6213	chr8:39297979-39368268	1.9181	0.753935	1.34717	0.0387	0.58616
ENSMUST00000191067.1	ENSMUSG00000046463.4	5930403N24Rik	chr10:37139913-37151315	1.24287	0.485082	1.35738	0.0056	0.166543
ENSMUST00000212695	ENSMUSG00000110626	RP23-312B17.1	chr8:126755570-126758334	0.86263	0.336556	1.3579	0.00585	0.171852
ENSMUST00000143649.1	ENSMUSG00000087684.1	1200007C13Rik	chr2:167827692-167833646	2.00357	0.740944	1.43514	0.0005	0.0280447
LNC_000321	XLOC_025314	-	chr19:20565336-20566710	5.0731	1.85528	1.45123	0.0005	0.0280447
ENSMUST00000180698.1	ENSMUSG00000096995.1	2810029C07Rik	chr12:111572320-111574402	1.8861	0.667716	1.4981	0.001	0.0477064
LNC_000310	XLOC_024117	-	chr18:65505623-65508028	0.538405	0.188658	1.51292	0.0227	0.424661
ENSMUST00000133125.2	ENSMUSG00000078122.4	F630028O10Rik	chrX:96239925-96243636	6.70874	2.27912	1.55757	0.0043	0.138816
ENSMUST00000204288.1	ENSMUSG00000107689.1	RP23-281H4.12	chr6:86513890-86516273	2.4902	0.827169	1.59001	0.033	0.534709
LNC_000525	XLOC_051105	-	chr8:93675564-93729622	0.671074	0.213519	1.65211	0.0443	0.632065
ENSMUST00000201893.1	ENSMUSG00000107029.1	Gm43123	chr5:135613828-135617299	0.507544	0.155538	1.70626	0.0038	0.127711
LNC_000486	XLOC_042967	-	chr6:127811095-127822100	0.991874	0.279078	1.82949	0.0001	0.00752154
LNC_000134	XLOC_011375	-	chr12:108860029-108894174	5.7236	1.43862	1.99223	0.00425	0.137881
LNC_000353	XLOC_028488	-	chr2:167878775-167890720	0.689782	0.16817	2.03622	0.0173	0.35783
ENSMUST00000181082.1	ENSMUSG00000097369.1	Gm26545	chr12:80885548-80887674	0.657889	0.154202	2.09303	0.0034	0.118092
LNC_000048	XLOC_004448	-	chr10:67654002-67656349	0.477812	0.100426	2.25032	0.01615	0.341825
ENSMUST00000147186.1	ENSMUSG00000087057.7	Gm11730	chr11:117094947-117097067	4.73043	0.969299	2.28696	5e-05	0.00413767
LNC_000027	XLOC_002616	-	chr1:74175576-74180761	0.57182	0.0911401	2.6494	0.0239	0.438557
LNC_000329	XLOC_025786	-	chr19:5786411-5787147	2.03679	0.314956	2.69308	0.0422	0.615087
ENSMUST00000216597	ENSMUSG00000111167	RP24-395P13.1	chr9:42142086-42146506	1.59724	0.216636	2.88224	0.001	0.0477064
ENSMUST00000181029.1	ENSMUSG00000066170.6	E230001N04Rik	chr17:28523256-28525347	4.02443	0.510636	2.97841	5e-05	0.00413767
ENSMUST00000151138.7	ENSMUSG00000086765.7	Gm11827	chr4:11122804-11126998	2.169	0.19815	3.45236	0.01585	0.33743
LNC_000322	XLOC_025362	-	chr19:24898964-24905904	0.748069	0.0473019	3.9832	0.0052	0.158114
ENSMUST00000198222.1	ENSMUSG00000104554.1	Gm42835	chr3:122377096-122391811	1.79364	0.110413	4.02191	0.0178	0.364088
ENSMUST00000193969.1	ENSMUSG00000102975.1	Gm37347	chr1:40074078-40125231	9.08259	0.0877656	6.6933	0.0004	0.0235705
LNC_000279	XLOC_022078	-	chr17:48332868-48334782	0.499593	0	inf	5e-05	0.00413767
ENSMUST00000195716.1	ENSMUSG00000102196.1	Gm38171	chr2:11315371-11319874	0.714094	0	inf	0.00015	0.0105044
ENSMUST00000217362	ENSMUSG00000111462	RP23-442M18.7	chr9:41651892-41654554	0	0.576746	#NAME?	0.013	0.295611

## Sheet: 7d Vs 0d
Identification of differentially expressed lncRNAs in the comparison between day 7 and day 0 in the VILI group
Transcript ID	Gene ID	Gene symbol	Gene location	VILI 7d FPKM	VILI day 0 FPKM	Log2 (Fold Change)	p-value	q-value
LNC_000027	XLOC_002616	-	chr1:74175576-74180761	0.0657468	0.57182	-3.12057	0.04605	0.644588
LNC_000267	XLOC_020816	-	chr16:55420849-55582747	0.102538	0.876996	-3.09642	0.01755	0.361114
LNC_000163	XLOC_013536	-	chr13:69787357-69792255	0.122608	0.860456	-2.81105	0.0006	0.0322352
LNC_000476	XLOC_041320	-	chr5:147787178-147795336	0.130429	0.747658	-2.51911	0.01595	0.338648
ENSMUST00000199551.1	ENSMUSG00000105160.1	A530030E21Rik	chr16:19243524-19244834	0.229143	1.23623	-2.43163	0.00285	0.10389
LNC_000190	XLOC_015671	-	chr14:51066300-51076580	0.250694	1.30747	-2.38278	0.00055	0.0301111
ENSMUST00000216597	ENSMUSG00000111167	RP24-395P13.1	chr9:42142086-42146506	0.351284	1.59724	-2.18487	5e-05	0.00413767
LNC_000170	XLOC_013872	-	chr13:120300246-120304286	0.140021	0.604195	-2.10937	0.0244	0.444212
ENSMUST00000142458.2	ENSMUSG00000084939.2	Gm830	chr4:95464723-95487394	0.198674	0.818851	-2.04319	0.0011	0.051116
LNC_000048	XLOC_004448	-	chr10:67654002-67656349	0.126552	0.477812	-1.91671	0.01405	0.311216
ENSMUST00000196893.1	ENSMUSG00000106461.1	Gm20755	chr3:37898812-37992728	0.132355	0.495845	-1.90547	0.01875	0.376107
ENSMUST00000147186.1	ENSMUSG00000087057.7	Gm11730	chr11:117094947-117097067	1.27883	4.73043	-1.88714	0.00185	0.0753809
LNC_000142	XLOC_012168	-	chr12:81800013-81807882	0.259881	0.92004	-1.82384	0.02575	0.458634
ENSMUST00000129007.1	ENSMUSG00000048215.14	A630023P12Rik	chr5:110514922-110525980	0.193369	0.68394	-1.82251	0.0227	0.424661
ENSMUST00000191791.1	ENSMUSG00000103409.1	Lsmem2	chr9:107593840-107597075	0.933332	3.29838	-1.82129	0.03195	0.52486
LNC_000239	XLOC_019067	-	chr15:78574319-78581604	1.25834	4.44187	-1.81964	0.0134	0.301173
LNC_000073	XLOC_005925	-	chr10:75838917-75843113	0.188996	0.662757	-1.81012	0.0059	0.172813
ENSMUST00000138444.1	ENSMUSG00000086862.1	Gm13546	chr2:58164000-58177063	0.358233	1.21679	-1.76411	0.01715	0.355891
LNC_000512	XLOC_048551	-	chr7:48126507-48132249	0.802634	2.66986	-1.73395	0.0273	0.475538
ENSMUST00000197379.1	ENSMUSG00000105044.1	Gm10416	chr5:109833500-109834145	0.480399	1.58128	-1.71878	0.025	0.450857
LNC_000087	XLOC_006717	-	chr11:4063248-4064627	0.179691	0.586157	-1.70577	0.03945	0.591762
ENSMUST00000147929.7	ENSMUSG00000074912.10	Gm14207	chr2:119321186-119325564	0.398993	1.29311	-1.69641	0.04305	0.621797
ENSMUST00000151051.1	ENSMUSG00000086652.1	Gm14029	chr2:129182481-129183947	0.176254	0.569579	-1.69224	0.02315	0.429946
LNC_000439	XLOC_037039	-	chr4:100034364-100042089	0.157396	0.501502	-1.67186	0.018	0.366403
ENSMUST00000181242.1	ENSMUSG00000097312.1	Gm26870	chr9:3000281-3021593	0.800189	2.5096	-1.64904	0.00605	0.17604
LNC_000210	XLOC_017853	-	chr15:61533021-61606894	0.193873	0.604572	-1.6408	0.0014	0.0614199
ENSMUST00000136438.7	ENSMUSG00000087259.7	2610035D17Rik	chr11:113043894-113201838	1.01624	3.08857	-1.60369	0.0238	0.437652
ENSMUST00000180639.1	ENSMUSG00000097915.1	A330009N23Rik	chr15:101221195-101224121	0.795676	2.39703	-1.591	0.0047	0.147175
ENSMUST00000200648.1	ENSMUSG00000106139.1	Gm43194	chr3:134199947-134213238	0.416433	1.25332	-1.5896	0.0069	0.192967
ENSMUST00000130392.7	ENSMUSG00000087060.7	Eldr	chr11:16935153-16951099	0.161168	0.481776	-1.5798	0.0418	0.611651
ENSMUST00000154798.7	ENSMUSG00000086283.7	2810433D01Rik	chr11:102619795-102624416	0.683331	1.91143	-1.484	0.009	0.23186
ENSMUST00000126260.1	ENSMUSG00000085452.1	4930554G24Rik	chr11:14072102-14179041	0.182637	0.506511	-1.47161	0.02885	0.49273
LNC_000178	XLOC_014307	-	chr13:37474055-37481799	0.197437	0.535547	-1.43962	0.0019	0.0769067
ENSMUST00000186444.1	ENSMUSG00000100594.1	2810414N06Rik	chr1:151748948-151755018	0.298155	0.784048	-1.39488	0.0282	0.48622
ENSMUST00000192201.2	ENSMUSG00000103126.2	Gm37387	chr19:11465249-11467055	0.488261	1.28197	-1.39264	0.00515	0.157071
LNC_000219	XLOC_018621	-	chr15:28149580-28155521	0.217644	0.568239	-1.38453	0.0031	0.110273
ENSMUST00000151170.7	ENSMUSG00000085171.7	D830026I12Rik	chr6:17197750-17205693	2.35577	5.99134	-1.34668	0.00055	0.0301111
ENSMUST00000149172.1	ENSMUSG00000084866.1	A930006K02Rik	chr16:91465103-91470121	0.785266	1.96527	-1.32347	0.0278	0.481202
ENSMUST00000212602	ENSMUSG00000110427	RP23-163N19.1	chr8:95496429-95503718	0.196047	0.478055	-1.28598	0.01075	0.261613
ENSMUST00000190728.1	ENSMUSG00000101210.1	Gm28720	chr6:86494648-86497804	0.274357	0.665357	-1.27807	0.0116	0.27391
LNC_000131	XLOC_011140	-	chr12:85454304-85456998	0.514509	1.24328	-1.27289	0.01535	0.330228
ENSMUST00000180698.1	ENSMUSG00000096995.1	2810029C07Rik	chr12:111572320-111574402	0.809922	1.8861	-1.21955	0.00465	0.146164
LNC_000257	XLOC_020531	-	chr16:19908719-19918339	0.298998	0.695799	-1.21853	0.00715	0.197976
ENSMUST00000150889.1	ENSMUSG00000085705.1	Gm16046	chr17:13675661-13683497	1.33832	3.10835	-1.21572	0.0257	0.458302
LNC_000281	XLOC_022209	-	chr17:65643420-65647258	0.219105	0.503341	-1.19992	0.0193	0.383414
ENSMUST00000152230.1	ENSMUSG00000085976.1	Gm13816	chr2:92742229-92759208	1.10367	2.50212	-1.18084	0.04285	0.620277
LNC_000349	XLOC_027693	-	chr2:106406394-106418393	0.263103	0.585834	-1.15487	0.00225	0.0872611
ENSMUST00000180809.2	ENSMUSG00000097569.2	Gm26640	chr6:72953235-72957247	0.211802	0.46833	-1.14481	0.02015	0.394076
LNC_000165	XLOC_013569	-	chr13:73762351-73763565	0.376917	0.83178	-1.14196	0.0496	0.671656
ENSMUST00000201831.3	ENSMUSG00000106734.3	Gm20559	chr6:3333193-3346128	3.98025	8.47723	-1.09073	0.0003	0.0186561
ENSMUST00000180547.1	ENSMUSG00000097006.7	9530082P21Rik	chr17:23741199-23751207	1.39222	2.94594	-1.08134	0.0116	0.27391
ENSMUST00000122898.1	ENSMUSG00000053957.5	Gm12474	chr3:100489663-100523920	0.653668	1.36879	-1.06627	0.03075	0.511967
ENSMUST00000136217.2	ENSMUSG00000085069.2	Gm13111	chr4:154637575-154644724	0.919846	1.85299	-1.01039	0.00785	0.210782
ENSMUST00000149940.1	ENSMUSG00000085148.1	Mir22hg	chr11:75461538-75466676	44.4886	22.2039	1.00262	0.0001	0.00752154
ENSMUST00000212427	ENSMUSG00000110462	RP24-129F24.1	chr8:71752025-71781322	0.685385	0.341935	1.00319	0.0377	0.578021
LNC_000051	XLOC_004475	-	chr10:69424857-69453014	2.16761	1.07213	1.01563	0.0012	0.0545744
LNC_000450	XLOC_037633	-	chr4:138961253-138969926	1.7625	0.870893	1.01705	0.017	0.353822
ENSMUST00000180729.1	ENSMUSG00000097884.1	Gm26543	chr10:49099842-49783259	1.50928	0.728002	1.05185	0.0406	0.6016
LNC_000377	XLOC_031798	-	chr3:86055941-86058069	2.32059	1.09339	1.08568	0.00945	0.239394
LNC_000026	XLOC_002585	-	chr1:72744977-72753114	0.783668	0.363224	1.10938	0.0456	0.641267
ENSMUST00000187172.1	ENSMUSG00000101268.6	2010310C07Rik	chr6:42377955-42381215	3.76793	1.725	1.12718	0.00315	0.111571
ENSMUST00000131188.2	ENSMUSG00000086006.2	Gm13293	chr2:11339487-11344111	1.05396	0.480338	1.13369	0.0221	0.417674
LNC_000407	XLOC_034553	-	chr4:11387150-11399723	0.588888	0.267173	1.14022	0.01215	0.282715
LNC_000225	XLOC_018667	-	chr15:36179367-36235610	1.39873	0.623945	1.16463	0.01985	0.389975
ENSMUST00000136359.7	ENSMUSG00000000031.15	H19	chr7:142575528-142578143	0.698963	0.309217	1.17659	0.02855	0.489588
ENSMUST00000145437.1	ENSMUSG00000075389.3	2810410L24Rik	chr11:120187706-120189852	6.04344	2.63531	1.1974	0.0114	0.271109
LNC_000393	XLOC_033193	-	chr3:58410744-58414666	1.14617	0.487052	1.23467	0.007	0.195017
ENSMUST00000143649.1	ENSMUSG00000087684.1	1200007C13Rik	chr2:167827692-167833646	4.72054	2.00357	1.23638	0.00045	0.0259452
LNC_000437	XLOC_036735	-	chr4:57427702-57434083	0.611893	0.257644	1.2479	0.02715	0.474143
ENSMUST00000176387.1	ENSMUSG00000093677.1	Gm20712	chr15:58780460-58781951	4.32627	1.81514	1.25304	0.0011	0.051116
ENSMUST00000141875.1	ENSMUSG00000084792.1	1700056N10Rik	chr16:17047519-17049111	6.50077	2.70199	1.26659	0.00095	0.0458858
ENSMUST00000181198.1	ENSMUSG00000097632.1	4930552P12Rik	chr19:55640588-55702204	0.705279	0.285613	1.30413	0.0217	0.413406
ENSMUST00000212679	ENSMUSG00000110676	RP24-257F22.2	chr9:118584852-118590195	0.777679	0.314689	1.30525	0.01965	0.38757
ENSMUST00000126622.7	ENSMUSG00000048603.8	Gm9828	chr13:98317068-98322035	1.31202	0.52446	1.32289	0.01525	0.328636
ENSMUST00000154993.1	ENSMUSG00000084990.1	Gm14549	chrX:36814770-36817200	1.51594	0.605579	1.32383	0.0214	0.410076
ENSMUST00000155674.1	ENSMUSG00000087445.1	Gm14286	chr2:157544265-157545469	3.03224	1.20289	1.33388	0.0392	0.590157
ENSMUST00000197174.1	ENSMUSG00000104682.1	Gm42636	chr5:145292769-145295008	4.32276	1.67368	1.36893	0.0001	0.00752154
LNC_000294	XLOC_023327	-	chr17:57273786-57275545	0.799487	0.303004	1.39974	0.02795	0.483182
ENSMUST00000196083.1	ENSMUSG00000106241.1	Gm43143	chr5:25687372-25689395	1.01331	0.376413	1.42869	0.0047	0.147175
ENSMUST00000199119.1	ENSMUSG00000106547.1	B230303O12Rik	chr5:146188619-146194809	3.14105	1.13527	1.46822	0.00015	0.0105044
ENSMUST00000215920	ENSMUSG00000111514	RP23-269O24.7	chr10:84518044-84523270	0.910024	0.328719	1.46905	0.035	0.552779
ENSMUST00000161759.1	ENSMUSG00000085287.8	4833418N02Rik	chr17:87274885-87282814	4.96179	1.78325	1.47635	0.00465	0.146164
ENSMUST00000201790.1	ENSMUSG00000107355.1	AI839979	chr5:31569594-31571397	3.59136	1.28867	1.47865	0.00125	0.0562956
LNC_000316	XLOC_024671	-	chr18:46215561-46219074	0.929533	0.326016	1.51156	0.00475	0.148277
ENSMUST00000120364.1	ENSMUSG00000053656.6	Dancr	chr5:74093076-74094337	6.71268	2.32275	1.53106	0.0372	0.573224
ENSMUST00000206112.1	ENSMUSG00000108368.1	RP23-335C3.10	chr6:72598474-72608425	3.97223	1.36311	1.54305	0.02575	0.458634
LNC_000243	XLOC_019385	-	chr15:101377790-101381661	0.717901	0.245236	1.54961	0.0017	0.0707411
LNC_000139	XLOC_011782	-	chr12:34657063-34714581	1.37322	0.448763	1.61354	0.00075	0.0382387
LNC_000505	XLOC_046667	-	chr7:102471970-102477902	1.31889	0.421664	1.64515	0.0009	0.0440307
LNC_000038	XLOC_003445	-	chr1:161694016-161704654	1.23777	0.395562	1.64577	0.022	0.417113
ENSMUST00000156149.7	ENSMUSG00000087373.7	Gm15892	chr11:88059065-88067476	1.75481	0.554361	1.66242	0.0062	0.178815
LNC_000430	XLOC_035855	-	chr4:135833305-135842875	0.71417	0.219413	1.70262	0.04875	0.665269
LNC_000264	XLOC_020744	-	chr16:38558697-38592162	7.27522	2.22171	1.71132	0.03865	0.58587
ENSMUST00000198804.1	ENSMUSG00000105517.1	Gm42436	chr3:41002433-41006089	1.93132	0.539048	1.8411	5e-05	0.00413767
ENSMUST00000181655.1	ENSMUSG00000096960.1	A230028O05Rik	chr16:25059638-25069058	0.738654	0.19999	1.88497	0.00455	0.143998
ENSMUST00000193350.1	ENSMUSG00000103966.1	Gm37120	chr1:132102364-132108323	1.42139	0.38293	1.89215	5e-05	0.00413767
LNC_000540	XLOC_052705	-	chr8:126567567-126571228	2.13571	0.572871	1.89844	0.02015	0.394076
LNC_000251	XLOC_019971	-	chr16:43648860-43710457	1.40835	0.372059	1.92041	0.0227	0.424661
LNC_000118	XLOC_010572	-	chr12:25240354-25266521	0.810908	0.209622	1.95175	0.00285	0.10389
LNC_000213	XLOC_018183	-	chr15:84317297-84322528	2.84016	0.729821	1.96036	5e-05	0.00413767
ENSMUST00000204898.1	ENSMUSG00000107899.1	RP23-296J10.10	chr6:136847743-136848249	0.80944	0.195319	2.05109	0.02685	0.471243
LNC_000135	XLOC_011600	-	chr12:7869900-7872366	1.15271	0.268952	2.09961	0.0003	0.0186561
ENSMUST00000143732.7	ENSMUSG00000073529.9	F830208F22Rik	chr18:77793258-77882007	1.13942	0.265019	2.10413	0.0293	0.497197
ENSMUST00000200021.1	ENSMUSG00000105361.1	Yam1	chr17:39847112-39848035	1121.03	252.23	2.15202	5e-05	0.00413767
ENSMUST00000128654.1	ENSMUSG00000085743.1	8430419K02Rik	chr11:18845850-18872155	3.37465	0.754523	2.1611	5e-05	0.00413767
LNC_000562	XLOC_055564	-	chr9:95435324-95439097	1.32772	0.288533	2.20214	0.0012	0.0545744
ENSMUST00000181400.1	ENSMUSG00000097155.1	Gm26511	chr9:21717615-21723450	0.509711	0.110521	2.20536	0.00685	0.192078
LNC_000246	XLOC_019799	-	chr16:25014062-25032337	1.27946	0.264919	2.27191	0.0002	0.0133323
LNC_000499	XLOC_045752	-	chr7:31085519-31091120	0.469806	0.0921648	2.34978	0.0019	0.0769067
ENSMUST00000181286.1	ENSMUSG00000097804.1	Gm16685	chr3:7569993-7690001	3.67146	0.716501	2.35732	0.007	0.195017
LNC_000479	XLOC_042372	-	chr6:86594538-86602829	1.46697	0.248807	2.55974	0.00505	0.154692
LNC_000314	XLOC_024595	-	chr18:38101591-38123218	1.73738	0.283819	2.61387	0.0013	0.058011
ENSMUST00000066604.3	ENSMUSG00000053889.5	Kirrel3os	chr9:34485893-35036716	1.14295	0.181038	2.6584	0.0058	0.170753
LNC_000119	XLOC_010572	-	chr12:25240354-25266521	0.918758	0.132474	2.79398	5e-05	0.00413767
LNC_000460	XLOC_038865	-	chr5:92980277-92982508	1.91739	0.224621	3.09358	0.0146	0.318898
ENSMUST00000123420.1	ENSMUSG00000085532.1	B430319H21Rik	chr11:63173913-63188454	5.93587	0.662564	3.16333	0.0003	0.0186561
ENSMUST00000203704.1	ENSMUSG00000107622.1	RP24-226D9.3	chr6:89269510-89285725	1.44409	0.152477	3.2435	0.00025	0.016035
ENSMUST00000198222.1	ENSMUSG00000104554.1	Gm42835	chr3:122377096-122391811	18.6649	1.79364	3.37937	5e-05	0.00413767
LNC_000266	XLOC_020761	-	chr16:44072710-44075102	0.776668	0.0678881	3.51607	0.00225	0.0872611
LNC_000352	XLOC_028151	-	chr2:149319504-149330045	1.13456	0.0845894	3.74551	0.0457	0.642055
ENSMUST00000151765.1	ENSMUSG00000085113.1	B130011K05Rik	chr11:63413168-63417888	1.0345	0.040756	4.66577	0.00235	0.0902182
ENSMUST00000205268.1	ENSMUSG00000108800.1	RP23-276E14.1	chr7:71961172-72027317	0.807907	0	inf	0.0017	0.0707411
LNC_000354	XLOC_028570	-	chr2:174439723-174445788	0.672619	0	inf	5e-05	0.00413767
LNC_000543	XLOC_053320	-	chr9:42193427-42195238	1.43568	0	inf	0.00075	0.0382387
ENSMUST00000123160.1	ENSMUSG00000086749.1	Gm12037	chr11:20831480-20831919	1.48228	0	inf	0.00105	0.0494336
LNC_000176	XLOC_014263	-	chr13:33562229-33569304	0.871422	0	inf	5e-05	0.00413767
ENSMUST00000203565.1	ENSMUSG00000107538.1	RP23-79A7.3	chr6:84225251-84286603	1.91649	0	inf	0.00105	0.0494336
ENSMUST00000129259.1	ENSMUSG00000085553.1	Gm14808	chrX:99459024-99460753	0	0.547263	#NAME?	0.01305	0.296287

## Sheet: 7d Vs Sham
Identification of differentially expressed lncRNAs in the comparison between sham and VILI group on day 7
Transcript ID	Gene ID	Gene symbol	Gene location	VILI 7d FPKM	Ctrl FPKM	Log2 (Fold Change)	p-value	q-value
LNC_000570	XLOC_058669	-	chrX:136041064-136051338	0.066057	0.991779	-3.90823	5e-05	0.00413767
LNC_000083	XLOC_006478	-	chr10:119046244-119076243	0.0613882	0.743536	-3.59837	0.0008	0.0401414
LNC_000084	XLOC_006478	-	chr10:119046244-119076243	0.0546136	0.602591	-3.46385	0.00435	0.13993
ENSMUST00000199551.1	ENSMUSG00000105160.1	A530030E21Rik	chr16:19243524-19244834	0.229143	2.12878	-3.2157	0.00055	0.0301111
LNC_000551	XLOC_054065	-	chr9:102488965-102496988	0.0649356	0.596369	-3.19912	0.00385	0.128912
ENSMUST00000206342.1	ENSMUSG00000108322.1	RP23-455C13.7	chr7:44484516-44485413	0.125839	1.12308	-3.15781	0.02465	0.447306
LNC_000471	XLOC_040380	-	chr5:75439257-75442288	0.0625248	0.557291	-3.15593	0.04555	0.640943
LNC_000193	XLOC_016209	-	chr14:103464065-103469411	0.0600714	0.530626	-3.14295	0.00315	0.111571
ENSMUST00000214642	ENSMUSG00000110891	RP23-199N18.2	chr10:45024301-45028152	0.139793	1.11284	-2.99288	0.00925	0.235964
LNC_000439	XLOC_037039	-	chr4:100034364-100042089	0.157396	1.2275	-2.96325	0.00015	0.0105044
LNC_000464	XLOC_039265	-	chr5:115203937-115205423	0.076041	0.549023	-2.85202	0.00935	0.237621
ENSMUST00000176275.1	ENSMUSG00000093507.1	Gm20627	chr3:96254618-96256277	0.272705	1.9311	-2.82401	0.0223	0.419991
LNC_000190	XLOC_015671	-	chr14:51066300-51076580	0.250694	1.69828	-2.76007	5e-05	0.00413767
ENSMUST00000147929.7	ENSMUSG00000074912.10	Gm14207	chr2:119321186-119325564	0.398993	2.62844	-2.71977	0.00435	0.13993
LNC_000553	XLOC_054361	-	chr9:121981605-121997110	0.201954	1.32379	-2.71257	0.00535	0.161409
LNC_000170	XLOC_013872	-	chr13:120300246-120304286	0.140021	0.896365	-2.67844	0.0098	0.245931
LNC_000432	XLOC_036190	-	chr4:153768465-153772011	0.0886356	0.543963	-2.61755	0.00315	0.111571
ENSMUST00000215835	ENSMUSG00000111055	RP24-541B4.5	chr10:39169299-39173252	0.142188	0.852928	-2.58462	5e-05	0.00413767
LNC_000285	XLOC_022423	-	chr17:4979143-4983282	0.0937679	0.548052	-2.54715	0.00055	0.0301111
ENSMUST00000203781.1	ENSMUSG00000108145.1	RP24-378N16.1	chr6:51694308-51711081	0.0878774	0.513447	-2.54665	0.0003	0.0186561
LNC_000512	XLOC_048551	-	chr7:48126507-48132249	0.802634	4.53366	-2.49786	0.0044	0.140989
ENSMUST00000162784.1	ENSMUSG00000090103.1	Gm16094	chr1:85599285-85599839	0.461481	2.36707	-2.35876	0.0286	0.489959
LNC_000163	XLOC_013536	-	chr13:69787357-69792255	0.122608	0.61559	-2.32792	0.00225	0.0872611
ENSMUST00000208822	ENSMUSG00000109321	A330076H08Rik	chr7:61930136-61982358	0.652898	3.18423	-2.28601	0.0016	0.0678737
ENSMUST00000197227.1	ENSMUSG00000105646.1	Gm43291	chr6:70719073-70740554	0.111878	0.542998	-2.27902	0.0023	0.0887292
ENSMUST00000180639.1	ENSMUSG00000097915.1	A330009N23Rik	chr15:101221195-101224121	0.795676	3.64294	-2.19485	0.00045	0.0259452
LNC_000116	XLOC_010561	-	chr12:24685938-24691665	0.185128	0.839363	-2.18077	5e-05	0.00413767
ENSMUST00000152230.1	ENSMUSG00000085976.1	Gm13816	chr2:92742229-92759208	1.10367	4.86499	-2.14013	0.00095	0.0458858
ENSMUST00000181242.1	ENSMUSG00000097312.1	Gm26870	chr9:3000281-3021593	0.800189	3.4653	-2.11457	0.0011	0.051116
ENSMUST00000142458.2	ENSMUSG00000084939.2	Gm830	chr4:95464723-95487394	0.198674	0.853256	-2.10257	0.001	0.0477064
LNC_000073	XLOC_005925	-	chr10:75838917-75843113	0.188996	0.801722	-2.08474	0.0024	0.0915272
LNC_000438	XLOC_037039	-	chr4:100034364-100042089	0.238257	0.987129	-2.05072	0.0015	0.0647157
ENSMUST00000155622.7	ENSMUSG00000087365.7	C430049B03Rik	chrX:53055045-53057190	1.73225	7.17445	-2.05022	0.02345	0.433356
LNC_000401	XLOC_034071	-	chr3:121895992-121936148	0.18374	0.746553	-2.02258	0.0167	0.349685
ENSMUST00000152109.1	ENSMUSG00000087365.7	C430049B03Rik	chrX:53055045-53057190	0.98326	3.96015	-2.00991	0.02825	0.486596
ENSMUST00000198676.1	ENSMUSG00000106634.1	Gm43042	chr5:59569701-59574242	11.6429	46.774	-2.00626	5e-05	0.00413767
ENSMUST00000181485.1	ENSMUSG00000097184.1	4632428C04Rik	chr16:30008666-30039923	0.819506	3.28539	-2.00324	0.02505	0.451287
ENSMUST00000201831.3	ENSMUSG00000106734.3	Gm20559	chr6:3333193-3346128	3.98025	15.5774	-1.96852	5e-05	0.00413767
LNC_000406	XLOC_034371	-	chr3:149284417-149445301	0.294	1.14691	-1.96386	0.01305	0.296287
LNC_000192	XLOC_016050	-	chr14:68461623-68533689	0.378922	1.46356	-1.94951	0.004	0.132118
LNC_000268	XLOC_020938	-	chr16:64870980-64873925	0.122238	0.470569	-1.94471	0.0271	0.473749
ENSMUST00000154798.7	ENSMUSG00000086283.7	2810433D01Rik	chr11:102619795-102624416	0.683331	2.62652	-1.9425	0.0012	0.0545744
ENSMUST00000148598.1	ENSMUSG00000086677.1	Tvp23bos	chr11:62919078-62921592	0.138549	0.523934	-1.91899	0.03545	0.556784
LNC_000265	XLOC_020752	-	chr16:42883807-42891646	0.382625	1.43301	-1.90504	0.00045	0.0259452
ENSMUST00000138444.1	ENSMUSG00000086862.1	Gm13546	chr2:58164000-58177063	0.358233	1.34018	-1.90346	0.0108	0.262527
ENSMUST00000204863.1	ENSMUSG00000108132.1	RP23-322E20.8	chr6:71354350-71360829	0.223257	0.812832	-1.86425	0.0017	0.0707411
ENSMUST00000207224	ENSMUSG00000109321	A330076H08Rik	chr7:61930136-61982358	0.16322	0.587751	-1.84839	0.02375	0.437071
ENSMUST00000196893.1	ENSMUSG00000106461.1	Gm20755	chr3:37898812-37992728	0.132355	0.476019	-1.8466	0.02095	0.404679
ENSMUST00000200648.1	ENSMUSG00000106139.1	Gm43194	chr3:134199947-134213238	0.416433	1.48252	-1.8319	0.00245	0.0928931
LNC_000045	XLOC_004071	-	chr10:22814845-22817263	0.182394	0.644068	-1.82016	0.0069	0.192967
ENSMUST00000209685	ENSMUSG00000109674	Gm45470	chr8:27225775-27240332	0.40941	1.4314	-1.80581	5e-05	0.00413767
ENSMUST00000181397.1	ENSMUSG00000096975.1	Gm16386	chr17:22784797-22817741	0.768485	2.67779	-1.80095	0.0005	0.0280447
ENSMUST00000207061	ENSMUSG00000109394	RP23-54G8.4	chr7:61916399-61928690	0.856341	2.94258	-1.78083	5e-05	0.00413767
ENSMUST00000210508	ENSMUSG00000110380	Gm45332	chr8:92152095-92158266	1.13781	3.90593	-1.7794	5e-05	0.00413767
LNC_000274	XLOC_021701	-	chr17:31726104-31732050	0.167639	0.566219	-1.756	0.0003	0.0186561
LNC_000459	XLOC_038858	-	chr5:92226678-92256278	0.180266	0.608843	-1.75594	0.02815	0.485534
LNC_000087	XLOC_006717	-	chr11:4063248-4064627	0.179691	0.594016	-1.72499	0.03685	0.570144
ENSMUST00000130392.7	ENSMUSG00000087060.7	Eldr	chr11:16935153-16951099	0.161168	0.532402	-1.72395	0.02765	0.479217
ENSMUST00000154354.1	ENSMUSG00000085882.1	2610507I01Rik	chr11:59199835-59202385	5.82745	19.0421	-1.70825	5e-05	0.00413767
LNC_000257	XLOC_020531	-	chr16:19908719-19918339	0.298998	0.976901	-1.70808	0.00025	0.016035
ENSMUST00000133960.1	ENSMUSG00000085180.1	AI838599	chr4:3246004-3258092	0.296928	0.967148	-1.70362	0.0118	0.277185
LNC_000122	XLOC_010688	-	chr12:35535054-35539052	0.166849	0.542888	-1.70211	0.0015	0.0647157
ENSMUST00000190728.1	ENSMUSG00000101210.1	Gm28720	chr6:86494648-86497804	0.274357	0.891202	-1.6997	0.0011	0.051116
ENSMUST00000150889.1	ENSMUSG00000085705.1	Gm16046	chr17:13675661-13683497	1.33832	4.34437	-1.69872	0.00295	0.106514
ENSMUST00000209455	ENSMUSG00000110264	E330018M18Rik	chr8:47135650-47163704	0.310963	1.00485	-1.69217	0.0076	0.206611
LNC_000564	XLOC_056409	-	chrX:50537370-50550838	0.456386	1.46383	-1.68142	0.002	0.0799322
LNC_000253	XLOC_020202	-	chr16:85215385-85217846	0.181719	0.582482	-1.6805	0.03245	0.529456
ENSMUST00000186073.6	ENSMUSG00000074067.9	Gm10619	chr7:73781428-73816431	0.263761	0.834535	-1.66174	0.00125	0.0562956
ENSMUST00000126260.1	ENSMUSG00000085452.1	4930554G24Rik	chr11:14072102-14179041	0.182637	0.575478	-1.65578	0.0158	0.336857
ENSMUST00000182127.1	ENSMUSG00000098243.3	Gm4258	chr1:137898597-138000384	1.51729	4.76708	-1.65161	0.0058	0.170753
ENSMUST00000127521.1	ENSMUSG00000087424.1	5730405O15Rik	chrX:13042014-13045297	0.598277	1.85988	-1.63632	0.00105	0.0494336
ENSMUST00000186444.1	ENSMUSG00000100594.1	2810414N06Rik	chr1:151748948-151755018	0.298155	0.920741	-1.62673	0.0128	0.29257
ENSMUST00000180423.5	ENSMUSG00000097339.5	Gm26671	chr3:57612696-57625818	1.00441	3.09041	-1.62145	0.01335	0.300547
ENSMUST00000208167	ENSMUSG00000109093	Gm19950	chr7:119607025-119662515	0.227517	0.695799	-1.6127	0.03685	0.570144
ENSMUST00000180468.1	ENSMUSG00000097154.2	Gm26510	chr17:70874348-70924996	0.490019	1.49754	-1.61168	0.0043	0.138816
LNC_000238	XLOC_019032	-	chr15:76918137-76924472	0.244491	0.743312	-1.60418	0.00045	0.0259452
ENSMUST00000181225.1	ENSMUSG00000097616.7	1110019D14Rik	chr6:13871525-14044385	1.1312	3.42422	-1.59792	0.0005	0.0280447
ENSMUST00000181764.7	ENSMUSG00000097207.7	6030443J06Rik	chr5:22550436-22558170	0.188244	0.561121	-1.57571	0.002	0.0799322
ENSMUST00000136438.7	ENSMUSG00000087259.7	2610035D17Rik	chr11:113043894-113201838	1.01624	3.02286	-1.57267	0.02575	0.458634
ENSMUST00000208953	ENSMUSG00000109554	RP24-274B19.1	chr7:61704518-61829422	0.317437	0.939263	-1.56506	0.0019	0.0769067
ENSMUST00000151651.1	ENSMUSG00000087646.1	Gm1667	chr4:139910487-139912133	0.819309	2.4207	-1.56295	0.02065	0.400718
ENSMUST00000149813.1	ENSMUSG00000086886.1	Gm15135	chr7:104244456-104262234	4.98517	14.7171	-1.56178	0.03565	0.558908
LNC_000239	XLOC_019067	-	chr15:78574319-78581604	1.25834	3.66862	-1.54371	0.0299	0.503688
LNC_000361	XLOC_029745	-	chr2:91035619-91053918	0.305642	0.881517	-1.52815	0.0296	0.500321
ENSMUST00000192201.2	ENSMUSG00000103126.2	Gm37387	chr19:11465249-11467055	0.488261	1.39406	-1.51357	0.00225	0.0872611
ENSMUST00000070085.5	ENSMUSG00000056145.5	AI504432	chr3:107039503-107054347	3.27898	9.29313	-1.50292	5e-05	0.00413767
ENSMUST00000199503.1	ENSMUSG00000106515.4	Gm30382	chr3:149284417-149445301	0.977486	2.75991	-1.49747	0.00825	0.218161
ENSMUST00000131216.7	ENSMUSG00000059027.14	9630013D21Rik	chr4:109652483-109657853	0.331558	0.929138	-1.48663	0.0069	0.192967
LNC_000160	XLOC_013400	-	chr13:56346465-56350144	0.205797	0.575404	-1.48335	0.0042	0.136679
ENSMUST00000212602	ENSMUSG00000110427	RP23-163N19.1	chr8:95496429-95503718	0.196047	0.546356	-1.47864	0.004	0.132118
LNC_000550	XLOC_053984	-	chr9:94538557-94565344	0.266132	0.729291	-1.45435	0.00145	0.0631177
ENSMUST00000196653.1	ENSMUSG00000105139.1	Gm43223	chr3:109120532-109122895	0.448585	1.2269	-1.45156	0.0144	0.316166
ENSMUST00000211750	ENSMUSG00000110018	RP24-502J3.1	chr15:5496265-5594984	0.248614	0.675307	-1.44163	0.0404	0.599947
ENSMUST00000192593.1	ENSMUSG00000104376.1	Gm37516	chr1:182679938-182681892	3.0925	8.36385	-1.43539	5e-05	0.00413767
ENSMUST00000186535.1	ENSMUSG00000022639.14	Dubr	chr16:50719293-50732773	4.7981	12.9231	-1.42942	0.01145	0.271924
ENSMUST00000148885.7	ENSMUSG00000085936.7	2610307P16Rik	chr13:28460033-28885620	2.01877	5.43061	-1.42764	0.0012	0.0545744
ENSMUST00000202425.1	ENSMUSG00000107148.1	Gm42888	chr5:69109284-69341679	0.432811	1.16108	-1.42366	0.0098	0.245931
ENSMUST00000191079.1	ENSMUSG00000022639.14	Dubr	chr16:50719293-50732773	3.00446	8.03456	-1.41911	0.0329	0.533681
ENSMUST00000133244.1	ENSMUSG00000044689.5	Gm13749	chr1:63964726-63968999	0.312562	0.835597	-1.41866	0.0183	0.370209
LNC_000028	XLOC_002756	-	chr1:86499918-86522374	0.230541	0.606059	-1.39443	0.03775	0.578507
ENSMUST00000136217.2	ENSMUSG00000085069.2	Gm13111	chr4:154637575-154644724	0.919846	2.39975	-1.38342	0.0001	0.00752154
ENSMUST00000180547.1	ENSMUSG00000097006.7	9530082P21Rik	chr17:23741199-23751207	1.39222	3.6126	-1.37565	0.0014	0.0614199
LNC_000364	XLOC_030337	-	chr2:147944739-148038270	0.466253	1.19597	-1.35899	0.0099	0.247557
LNC_000210	XLOC_017853	-	chr15:61533021-61606894	0.193873	0.496676	-1.35719	0.006	0.175148
ENSMUST00000149172.1	ENSMUSG00000084866.1	A930006K02Rik	chr16:91465103-91470121	0.785266	1.98748	-1.33969	0.028	0.483738
LNC_000178	XLOC_014307	-	chr13:37474055-37481799	0.197437	0.49857	-1.3364	0.0034	0.118092
ENSMUST00000181274.1	ENSMUSG00000097448.1	Platr22	chr1:136696210-136726142	0.819309	2.05613	-1.32745	0.003	0.107888
ENSMUST00000189288.1	ENSMUSG00000100658.1	F730311O21Rik	chr1:132342022-132349626	0.52609	1.31141	-1.31773	0.0009	0.0440307
ENSMUST00000142429.1	ENSMUSG00000085395.1	Gm13056	chr4:141278438-141279794	2.43712	6.06799	-1.31604	0.00585	0.171852
ENSMUST00000193595.1	ENSMUSG00000103115.1	Gm37584	chr3:88526065-88527355	0.371478	0.923	-1.31306	0.0392	0.590157
ENSMUST00000145769.7	ENSMUSG00000052125.16	F730043M19Rik	chr12:33134642-33147597	0.756741	1.87911	-1.31218	0.00515	0.157071
ENSMUST00000192778.1	ENSMUSG00000103114.1	Gm32200	chr1:191436339-191465048	0.727676	1.80385	-1.30971	0.0024	0.0915272
ENSMUST00000181713.1	ENSMUSG00000097363.1	Gm26717	chr18:32153475-32160427	0.408079	1.00188	-1.2958	0.0237	0.436405
ENSMUST00000181180.1	ENSMUSG00000097796.1	Gm16702	chr17:8372395-8422728	0.397434	0.974622	-1.29413	0.04315	0.62239
ENSMUST00000136376.1	ENSMUSG00000062470.9	Fbxl12os	chr9:20607480-20617271	0.562989	1.35855	-1.27089	0.0065	0.185134
LNC_000395	XLOC_033786	-	chr3:98378299-98382404	0.362703	0.874532	-1.26972	0.0072	0.198781
ENSMUST00000180830.1	ENSMUSG00000097290.7	1300002E11Rik	chr16:21794346-21809037	1.98909	4.79449	-1.26927	0.0045	0.14282
LNC_000219	XLOC_018621	-	chr15:28149580-28155521	0.217644	0.522138	-1.26246	0.0048	0.149371
ENSMUST00000181955.1	ENSMUSG00000074415.10	2610203C20Rik	chr9:41376396-41615185	1.55068	3.70857	-1.25796	0.0192	0.381987
LNC_000165	XLOC_013569	-	chr13:73762351-73763565	0.376917	0.893085	-1.24455	0.03515	0.553812
ENSMUST00000191701.1	ENSMUSG00000103130.1	F830212C03Rik	chr15:12633061-12635346	0.300813	0.70948	-1.23789	0.01865	0.374814
ENSMUST00000144796.1	ENSMUSG00000086502.1	B130055M24Rik	chr7:127442135-127460360	2.37956	5.53762	-1.21857	0.0326	0.530673
ENSMUST00000145042.1	ENSMUSG00000106951.1	5930430L01Rik	chr5:148871583-149015813	2.00522	4.59159	-1.19523	0.0075	0.204713
LNC_000126	XLOC_010897	-	chr12:70813079-70819530	0.455621	1.03119	-1.1784	0.0045	0.14282
LNC_000349	XLOC_027693	-	chr2:106406394-106418393	0.263103	0.592588	-1.1714	0.00205	0.0813655
ENSMUST00000131147.1	ENSMUSG00000087028.7	Gm13387	chr2:25122602-25145396	1.18848	2.65951	-1.16204	0.007	0.195017
ENSMUST00000194287.1	ENSMUSG00000103160.1	C130012C08Rik	chr14:21992435-21996100	1.0585	2.33787	-1.14317	0.00175	0.0722832
ENSMUST00000210683	ENSMUSG00000092178	Gm45351	chr7:9868879-9876966	0.281946	0.605112	-1.10179	0.0238	0.437652
ENSMUST00000191186.1	ENSMUSG00000073147.3	5031425E22Rik	chr5:23382307-23433336	2.9556	6.23715	-1.07744	0.04055	0.601188
LNC_000402	XLOC_034096	-	chr3:123436975-123443879	0.253449	0.528574	-1.06041	0.0381	0.580918
ENSMUST00000151170.7	ENSMUSG00000085171.7	D830026I12Rik	chr6:17197750-17205693	2.35577	4.89741	-1.05582	0.006	0.175148
ENSMUST00000180951.2	ENSMUSG00000097287.2	D130017N08Rik	chr5:143758353-143765810	0.743308	1.53986	-1.05076	0.01	0.249009
ENSMUST00000181501.2	ENSMUSG00000097842.2	9330104G04Rik	chr7:16871346-16874886	0.590281	1.21843	-1.04555	0.021	0.405356
LNC_000194	XLOC_016209	-	chr14:103504689-103513013	0.501455	1.02708	-1.03435	0.0059	0.172813
ENSMUST00000182109.1	ENSMUSG00000097990.1	Gm19557	chr19:47501032-47537507	1.36443	2.78648	-1.03014	0.04625	0.646292
ENSMUST00000205836.1	ENSMUSG00000108481.1	RP23-68N11.2	chr7:129658927-129731647	4.32943	8.72321	-1.01068	0.0307	0.511673
ENSMUST00000196466.1	ENSMUSG00000104960.1	Snhg8	chr3:123507551-123508404	95.2656	47.5597	1.00222	0.0005	0.0280447
LNC_000129	XLOC_010948	-	chr12:75404065-75416781	0.64234	0.315737	1.02461	0.0362	0.56427
ENSMUST00000189150.1	ENSMUSG00000100106.1	Gm28856	chr1:130766383-130784433	1.04493	0.513364	1.02536	0.01995	0.391333
ENSMUST00000140833.1	ENSMUSG00000086075.1	Gm15728	chr5:117389138-117393498	0.539865	0.263858	1.03283	0.0382	0.581695
ENSMUST00000212695	ENSMUSG00000110626	RP23-312B17.1	chr8:126755570-126758334	0.702797	0.336556	1.06226	0.03335	0.537948
ENSMUST00000212679	ENSMUSG00000110676	RP24-257F22.2	chr9:118584852-118590195	0.777679	0.370878	1.06823	0.04265	0.618607
ENSMUST00000141875.1	ENSMUSG00000084792.1	1700056N10Rik	chr16:17047519-17049111	6.50077	3.09062	1.07272	0.00615	0.177643
LNC_000187	XLOC_015328	-	chr14:25355800-25389883	1.07799	0.511892	1.07444	0.0047	0.147175
ENSMUST00000181623.1	ENSMUSG00000097930.1	C330002G04Rik	chr19:23037389-23075853	1.1647	0.54563	1.09397	0.0237	0.436405
ENSMUST00000146010.2	ENSMUSG00000087590.2	Epb41l4aos	chr18:33794891-33795986	31.5461	14.7755	1.09426	0.00415	0.13561
ENSMUST00000137539.7	ENSMUSG00000085287.8	4833418N02Rik	chr17:87274885-87282814	2.48131	1.15973	1.09731	0.04945	0.670582
ENSMUST00000180489.7	ENSMUSG00000097636.7	Mirt1	chr19:53441211-53464796	1.85341	0.861327	1.10555	0.03115	0.516318
ENSMUST00000180775.1	ENSMUSG00000097059.1	Fam120aos	chr13:48968286-48972031	8.43919	3.90436	1.11202	0.00055	0.0301111
ENSMUST00000176387.1	ENSMUSG00000093677.1	Gm20712	chr15:58780460-58781951	4.32627	1.98268	1.12567	0.00365	0.124052
ENSMUST00000126622.7	ENSMUSG00000048603.8	Gm9828	chr13:98317068-98322035	1.31202	0.600002	1.12875	0.0347	0.550283
ENSMUST00000187172.1	ENSMUSG00000101268.6	2010310C07Rik	chr6:42377955-42381215	3.76793	1.69978	1.14843	0.0016	0.0678737
LNC_000074	XLOC_005981	-	chr10:78248753-78264231	2.22813	1.00129	1.15397	0.0091	0.233517
ENSMUST00000206201.1	ENSMUSG00000108461.1	RP24-157O12.2	chr7:116443574-116444324	6.40878	2.8796	1.15418	0.00715	0.197976
ENSMUST00000137073.1	ENSMUSG00000085852.1	Gm13807	chr2:93403546-93417830	2.03032	0.910422	1.1571	0.0151	0.326477
ENSMUST00000147762.7	ENSMUSG00000085156.7	Gm11974	chr11:6525590-6528760	5.33148	2.38887	1.1582	0.0136	0.304372
ENSMUST00000097531.2	ENSMUSG00000073535.5	Gm5532	chr1:155520172-155527111	1.18174	0.527642	1.16328	0.0153	0.329414
ENSMUST00000182580.7	ENSMUSG00000098234.7	Snhg6	chr1:9908637-9944118	24.1582	10.6136	1.1866	0.0175	0.360554
LNC_000321	XLOC_025314	-	chr19:20565336-20566710	4.27134	1.85528	1.20305	0.00475	0.148277
LNC_000393	XLOC_033193	-	chr3:58410744-58414666	1.14617	0.493565	1.21551	0.0078	0.210004
ENSMUST00000181502.1	ENSMUSG00000097062.1	Gm17586	chr11:120633767-120635125	4.92959	2.03186	1.27867	0.0041	0.134439
LNC_000294	XLOC_023327	-	chr17:57273786-57275545	0.799487	0.328184	1.28457	0.0351	0.553484
ENSMUST00000139163.7	ENSMUSG00000085891.7	Gm14634	chrX:12762277-12821492	0.91654	0.37182	1.30159	0.0317	0.522244
LNC_000486	XLOC_042967	-	chr6:127811095-127822100	0.688196	0.279078	1.30215	0.0047	0.147175
ENSMUST00000182303.1	ENSMUSG00000097970.1	Gm27028	chr1:23291536-23291935	5.80075	2.31855	1.32302	0.0233	0.431845
LNC_000340	XLOC_026470	-	chr19:59714919-59760944	1.96447	0.775418	1.34109	0.0428	0.619836
ENSMUST00000172202.1	ENSMUSG00000091021.1	Gm17300	chr4:132331918-132353663	8.73542	3.43381	1.34707	0.00225	0.0872611
ENSMUST00000131222.1	ENSMUSG00000085829.1	Gm4285	chr14:75843378-75844964	5.00003	1.95467	1.35501	0.0011	0.051116
ENSMUST00000181539.1	ENSMUSG00000097636.7	Mirt1	chr19:53441211-53464796	2.96825	1.15679	1.35949	0.03765	0.577674
ENSMUST00000185486.1	ENSMUSG00000100975.1	Gm28875	chr12:104925500-104926142	6.42574	2.50141	1.36112	0.0032	0.112858
ENSMUST00000180408.1	ENSMUSG00000096957.1	E230013L22Rik	chr8:11453517-11480241	5.23104	2.00986	1.38	0.0057	0.168593
ENSMUST00000066604.3	ENSMUSG00000053889.5	Kirrel3os	chr9:34485893-35036716	1.14295	0.435909	1.39067	0.02125	0.408067
LNC_000026	XLOC_002585	-	chr1:72744977-72753114	0.783668	0.298515	1.39244	0.00955	0.241251
ENSMUST00000180690.1	ENSMUSG00000096917.1	2500002B13Rik	chr8:57488053-57508877	0.984931	0.369272	1.41534	0.0031	0.110273
ENSMUST00000146110.1	ENSMUSG00000063751.6	Platr8	chr2:109902395-109913319	1.45531	0.5454	1.41594	0.008	0.213542
ENSMUST00000180778.1	ENSMUSG00000097819.1	Gm26813	chr1:59488479-59492605	1.48864	0.554823	1.42389	0.00045	0.0259452
LNC_000273	XLOC_021669	-	chr17:29048557-29054387	0.738142	0.274855	1.42523	0.0016	0.0678737
ENSMUST00000155674.1	ENSMUSG00000087445.1	Gm14286	chr2:157544265-157545469	3.03224	1.12514	1.43028	0.02625	0.464231
LNC_000336	XLOC_026411	-	chr19:53441211-53464796	2.89419	1.0683	1.43784	0.0009	0.0440307
ENSMUST00000181781.1	ENSMUSG00000097766.1	5730420D15Rik	chr10:95417374-95428640	1.08513	0.398505	1.4452	0.01435	0.315469
ENSMUST00000180959.1	ENSMUSG00000097579.1	Gm26799	chr6:112696776-112704668	0.575735	0.2105	1.45159	0.04345	0.624866
ENSMUST00000205492.1	ENSMUSG00000108601.1	RP23-8I8.4	chr7:73422249-73423902	1.86844	0.673577	1.47192	0.0021	0.0828307
ENSMUST00000161759.1	ENSMUSG00000085287.8	4833418N02Rik	chr17:87274885-87282814	4.96179	1.74467	1.50791	0.0039	0.129922
ENSMUST00000202926.1	ENSMUSG00000106858.1	Gm43844	chr6:17693946-17943025	1.32069	0.46335	1.51112	0.031	0.514596
LNC_000134	XLOC_011375	-	chr12:108860029-108894174	4.11173	1.43862	1.51506	0.0433	0.623417
ENSMUST00000180563.8	ENSMUSG00000097195.8	Snhg5	chr9:88521049-88522929	15.7706	5.45275	1.53218	0.00165	0.0694056
ENSMUST00000181286.1	ENSMUSG00000097804.1	Gm16685	chr3:7569993-7690001	3.67146	1.26919	1.53245	0.04135	0.607688
ENSMUST00000149940.1	ENSMUSG00000085148.1	Mir22hg	chr11:75461538-75466676	44.4886	15.1386	1.5552	5e-05	0.00413767
ENSMUST00000197174.1	ENSMUSG00000104682.1	Gm42636	chr5:145292769-145295008	4.32276	1.44428	1.5816	0.00015	0.0105044
ENSMUST00000191157.6	ENSMUSG00000101585.6	1600010M07Rik	chr7:109998375-110006646	4.3778	1.43945	1.60469	0.00665	0.188053
ENSMUST00000190861.1	ENSMUSG00000100287.1	Gm28068	chr15:75007302-75024410	0.519409	0.169744	1.61351	0.0045	0.14282
ENSMUST00000191067.1	ENSMUSG00000046463.4	5930403N24Rik	chr10:37139913-37151315	1.50761	0.485082	1.63596	0.0013	0.058011
ENSMUST00000198804.1	ENSMUSG00000105517.1	Gm42436	chr3:41002433-41006089	1.93132	0.618167	1.64352	5e-05	0.00413767
LNC_000225	XLOC_018667	-	chr15:36179367-36235610	1.39873	0.439206	1.67115	0.00075	0.0382387
ENSMUST00000209823	ENSMUSG00000110386	Gm42031	chr8:85125871-85132289	21.8466	6.84785	1.67369	5e-05	0.00413767
ENSMUST00000200021.1	ENSMUSG00000105361.1	Yam1	chr17:39847112-39848035	1121.03	342.194	1.71194	5e-05	0.00413767
ENSMUST00000146314.1	ENSMUSG00000085894.1	Gm15832	chr1:39547569-39577405	8.93478	2.69076	1.73142	0.0377	0.578021
ENSMUST00000143732.7	ENSMUSG00000073529.9	F830208F22Rik	chr18:77793258-77882007	1.13942	0.342293	1.73499	0.0375	0.576164
ENSMUST00000206112.1	ENSMUSG00000108368.1	RP23-335C3.10	chr6:72598474-72608425	3.97223	1.1867	1.74299	0.0113	0.269541
ENSMUST00000199119.1	ENSMUSG00000106547.1	B230303O12Rik	chr5:146188619-146194809	3.14105	0.928825	1.75777	5e-05	0.00413767
LNC_000451	XLOC_037639	-	chr4:139153571-139154789	0.483673	0.140276	1.78576	0.04755	0.656059
ENSMUST00000212406	ENSMUSG00000110697	RP23-312B17.2	chr8:126812639-126908215	0.643917	0.183136	1.81396	0.03835	0.582998
ENSMUST00000130679.1	ENSMUSG00000006462.6	A530013C23Rik	chr2:167691180-167697801	3.75288	1.03353	1.86042	5e-05	0.00413767
LNC_000147	XLOC_012826	-	chr13:5870989-5898113	1.06424	0.291096	1.87026	5e-05	0.00413767
ENSMUST00000215920	ENSMUSG00000111514	RP23-269O24.7	chr10:84518044-84523270	0.910024	0.246873	1.88214	0.01705	0.354629
ENSMUST00000201790.1	ENSMUSG00000107355.1	AI839979	chr5:31569594-31571397	3.59136	0.950321	1.91804	0.00015	0.0105044
LNC_000407	XLOC_034553	-	chr4:11387150-11399723	0.588888	0.155801	1.91829	0.0004	0.0235705
LNC_000505	XLOC_046667	-	chr7:102471970-102477902	1.31889	0.344374	1.93727	0.00025	0.016035
ENSMUST00000156081.1	ENSMUSG00000086320.1	Gm12840	chr4:117700187-117700923	661.035	165.594	1.99708	5e-05	0.00413767
ENSMUST00000154993.1	ENSMUSG00000084990.1	Gm14549	chrX:36814770-36817200	1.51594	0.379028	1.99984	0.00435	0.13993
ENSMUST00000212914	ENSMUSG00000110498	RP23-312B17.3	chr8:126812639-126908215	0.507888	0.125226	2.01997	0.01965	0.38757
ENSMUST00000133125.2	ENSMUSG00000078122.4	F630028O10Rik	chrX:96239925-96243636	9.4447	2.27912	2.05103	0.0002	0.0133323
ENSMUST00000181400.1	ENSMUSG00000097155.1	Gm26511	chr9:21717615-21723450	0.509711	0.11882	2.1009	0.00575	0.169781
ENSMUST00000180863.1	ENSMUSG00000097815.1	Gm26809	chr6:18844219-18848207	233.108	51.8596	2.16832	5e-05	0.00413767
LNC_000316	XLOC_024671	-	chr18:46215561-46219074	0.929533	0.204465	2.18465	0.0002	0.0133323
ENSMUST00000201893.1	ENSMUSG00000107029.1	Gm43123	chr5:135613828-135617299	0.713562	0.155538	2.19777	0.0006	0.0322352
ENSMUST00000207965	ENSMUSG00000109424	Gm44658	chr7:19846972-19847609	0.924632	0.200527	2.20509	0.04525	0.638614
ENSMUST00000197198.1	ENSMUSG00000104574.1	Gm42836	chr3:122419777-122530191	27.9113	5.98038	2.22254	0.0353	0.5553
ENSMUST00000213859	ENSMUSG00000110755	RP24-282C4.11	chr9:44670452-44672238	0.621581	0.129011	2.26845	0.03765	0.577674
LNC_000213	XLOC_018183	-	chr15:84317297-84322528	2.84016	0.5807	2.2901	5e-05	0.00413767
LNC_000516	XLOC_050093	-	chr8:8692856-8696799	0.536853	0.102046	2.3953	0.0119	0.278845
LNC_000502	XLOC_046571	-	chr7:97309379-97332020	2.28012	0.41198	2.46846	0.02305	0.428675
ENSMUST00000213816	ENSMUSG00000111610	RP23-37D14.4	chr9:77992598-78002261	0.688148	0.119757	2.52261	0.048	0.659155
ENSMUST00000204442.1	ENSMUSG00000107605.1	RP23-370A2.6	chr6:90459710-90461468	0.535436	0.0928542	2.52767	0.0054	0.162555
ENSMUST00000128654.1	ENSMUSG00000085743.1	8430419K02Rik	chr11:18845850-18872155	3.37465	0.569534	2.56689	5e-05	0.00413767
LNC_000479	XLOC_042372	-	chr6:86594538-86602829	1.46697	0.239192	2.6166	0.00325	0.114218
ENSMUST00000203704.1	ENSMUSG00000107622.1	RP24-226D9.3	chr6:89269510-89285725	1.44409	0.229267	2.65506	0.0001	0.00752154
LNC_000119	XLOC_010572	-	chr12:25240354-25266521	0.918758	0.144623	2.66739	5e-05	0.00413767
ENSMUST00000143649.1	ENSMUSG00000087684.1	1200007C13Rik	chr2:167827692-167833646	4.72054	0.740944	2.67152	5e-05	0.00413767
ENSMUST00000156149.7	ENSMUSG00000087373.7	Gm15892	chr11:88059065-88067476	1.75481	0.266045	2.72157	0.00375	0.126703
ENSMUST00000181198.1	ENSMUSG00000097632.1	4930552P12Rik	chr19:55640588-55702204	0.705279	0.106908	2.72182	0.00065	0.0342624
ENSMUST00000181082.1	ENSMUSG00000097369.1	Gm26545	chr12:80885548-80887674	1.02654	0.154202	2.7349	0.0007	0.0362738
LNC_000475	XLOC_040880	-	chr5:118373288-118380489	0.521387	0.0744481	2.80805	0.00285	0.10389
LNC_000246	XLOC_019799	-	chr16:25014062-25032337	1.27946	0.182257	2.81148	5e-05	0.00413767
ENSMUST00000143671.1	ENSMUSG00000022915.3	1700093J21Rik	chr16:96082675-96089070	1.33567	0.184677	2.85449	0.01895	0.378559
LNC_000540	XLOC_052705	-	chr8:126567567-126571228	2.13571	0.280278	2.92979	0.0042	0.136679
ENSMUST00000204275.1	ENSMUSG00000107667.2	RP23-210L10.2	chr6:50776323-50815033	0.527672	0.0659738	2.99968	0.0115	0.272804
LNC_000251	XLOC_019971	-	chr16:43648860-43710457	1.40835	0.175286	3.00622	5e-05	0.00413767
LNC_000264	XLOC_020744	-	chr16:38558697-38592162	7.27522	0.905106	3.00683	0.0023	0.0887292
LNC_000562	XLOC_055564	-	chr9:95435324-95439097	1.32772	0.164432	3.01338	5e-05	0.00413767
LNC_000437	XLOC_036735	-	chr4:57427702-57434083	0.611893	0.0724111	3.079	0.00095	0.0458858
LNC_000444	XLOC_037347	-	chr4:126007252-126023064	0.560422	0.063474	3.14228	5e-05	0.00413767
LNC_000314	XLOC_024595	-	chr18:38101591-38123218	1.73738	0.191531	3.18126	5e-05	0.00413767
LNC_000499	XLOC_045752	-	chr7:31085519-31091120	0.469806	0.0491752	3.25606	0.0029	0.105108
ENSMUST00000181029.1	ENSMUSG00000066170.6	E230001N04Rik	chr17:28523256-28525347	5.29232	0.510636	3.37353	5e-05	0.00413767
LNC_000304	XLOC_023624	-	chr18:4908935-4912358	1.38819	0.133209	3.38145	0.02445	0.444824
LNC_000118	XLOC_010572	-	chr12:25240354-25266521	0.810908	0.0766115	3.4039	0.0375	0.576164
LNC_000243	XLOC_019385	-	chr15:101377790-101381661	0.717901	0.0647701	3.47039	0.0001	0.00752154
ENSMUST00000193350.1	ENSMUSG00000103966.1	Gm37120	chr1:132102364-132108323	1.42139	0.121341	3.55016	5e-05	0.00413767
LNC_000135	XLOC_011600	-	chr12:7869900-7872366	1.15271	0.0929206	3.63289	0.0002	0.0133323
LNC_000322	XLOC_025362	-	chr19:24898964-24905904	0.597655	0.0473019	3.65934	0.0068	0.191099
ENSMUST00000181655.1	ENSMUSG00000096960.1	A230028O05Rik	chr16:25059638-25069058	0.738654	0.0568585	3.69945	0.00215	0.0844346
LNC_000460	XLOC_038865	-	chr5:92980277-92982508	1.91739	0.1463	3.71215	0.02285	0.426585
ENSMUST00000151138.7	ENSMUSG00000086765.7	Gm11827	chr4:11122804-11126998	2.63836	0.19815	3.73498	0.0104	0.255651
LNC_000329	XLOC_025786	-	chr19:5786411-5787147	4.29267	0.314956	3.76865	0.0284	0.488029
ENSMUST00000215873	ENSMUSG00000111731	RP23-225D5.4	chr10:8903980-8945137	1.23589	0.0875684	3.819	0.04905	0.667636
LNC_000266	XLOC_020761	-	chr16:44072710-44075102	0.776668	0.0394648	4.29866	0.01115	0.267644
ENSMUST00000123420.1	ENSMUSG00000085532.1	B430319H21Rik	chr11:63173913-63188454	5.93587	0.160911	5.20513	0.01155	0.273341
ENSMUST00000193969.1	ENSMUSG00000102975.1	Gm37347	chr1:40074078-40125231	9.78968	0.0877656	6.80146	0.0004	0.0235705
ENSMUST00000198222.1	ENSMUSG00000104554.1	Gm42835	chr3:122377096-122391811	18.6649	0.110413	7.40128	0.01775	0.363574
ENSMUST00000205268.1	ENSMUSG00000108800.1	RP23-276E14.1	chr7:71961172-72027317	0.807907	0	inf	0.0017	0.0707411
LNC_000507	XLOC_047405	-	chr7:145068588-145070809	0.564797	0	inf	5e-05	0.00413767
LNC_000021	XLOC_001652	-	chr1:170994613-170996055	1.43059	0	inf	0.0001	0.00752154
LNC_000543	XLOC_053320	-	chr9:42193427-42195238	1.43568	0	inf	0.00075	0.0382387
ENSMUST00000195716.1	ENSMUSG00000102196.1	Gm38171	chr2:11315371-11319874	0.658117	0	inf	0.00015	0.0105044
LNC_000176	XLOC_014263	-	chr13:33562229-33569304	0.871422	0	inf	5e-05	0.00413767
ENSMUST00000213143	ENSMUSG00000111146	RP23-12I4.3	chr9:122435817-122438165	0.736029	0	inf	5e-05	0.00413767
ENSMUST00000206372.1	ENSMUSG00000108783.1	RP23-298C3.14	chr7:43670840-43671314	0	5.06694	#NAME?	0.01765	0.362112
