# Supplementary material for: Landscape of transcription and long non-coding RNAs reveals new insights into the inflammatory and fibrotic response following ventilator-induced lung injury
Source: Respir Res. 2018 Jun 22;19:122. doi: 10.1186/s12931-018-0822-z (PMC6013938; doi:10.1186/s12931-018-0822-z)
Supplement: Supplementary file 11 — Table S6. The entire list of significant dysregulated GO terms of target genes in the comparisons of each pair. (XLSX 2312 kb) [file 12931_2018_822_MOESM11_ESM.xlsx]

## Sheet: 0d Vs Sham
GO analysis of target genes in the comparison between sham and VILI group on day 0
Term	Database	ID	Input number	Background number	P-Value	Corrected P-Value	Input	Hyperlink
binding	Gene Ontology	GO:0005488	919	10562	8.84874e-41	4.9916e-37	ENSMUSG00000053198|ENSMUSG00000029510|ENSMUSG00000002017|ENSMUSG00000032010|ENSMUSG00000049892|ENSMUSG00000021712|ENSMUSG00000059327|ENSMUSG00000058624|ENSMUSG00000031586|ENSMUSG00000046027|ENSMUSG00000028341|ENSMUSG00000030110|ENSMUSG00000026491|ENSMUSG00000037242|ENSMUSG00000041272|ENSMUSG00000023286|ENSMUSG00000042826|ENSMUSG00000026180|ENSMUSG00000030849|ENSMUSG00000028933|ENSMUSG00000049940|…	http://amigo.geneontology.org/cgi-bin/amigo/term_details?term=GO:0005488
cell part	Gene Ontology	GO:0044464	1046	12696	1.71454e-40	4.9916e-37	ENSMUSG00000053198|ENSMUSG00000029510|ENSMUSG00000002017|ENSMUSG00000029517|ENSMUSG00000032010|ENSMUSG00000092586|ENSMUSG00000029273|ENSMUSG00000049892|ENSMUSG00000021712|ENSMUSG00000059327|ENSMUSG00000003970|ENSMUSG00000031586|ENSMUSG00000050558|ENSMUSG00000028341|ENSMUSG00000030110|ENSMUSG00000041975|ENSMUSG00000026491|ENSMUSG00000037242|ENSMUSG00000041272|ENSMUSG00000023286|ENSMUSG00000026180|…	http://amigo.geneontology.org/cgi-bin/amigo/term_details?term=GO:0044464
cell	Gene Ontology	GO:0005623	1046	12696	1.71454e-40	4.9916e-37	ENSMUSG00000053198|ENSMUSG00000029510|ENSMUSG00000002017|ENSMUSG00000029517|ENSMUSG00000032010|ENSMUSG00000092586|ENSMUSG00000029273|ENSMUSG00000049892|ENSMUSG00000021712|ENSMUSG00000059327|ENSMUSG00000003970|ENSMUSG00000031586|ENSMUSG00000050558|ENSMUSG00000028341|ENSMUSG00000030110|ENSMUSG00000041975|ENSMUSG00000026491|ENSMUSG00000037242|ENSMUSG00000041272|ENSMUSG00000023286|ENSMUSG00000026180|…	http://amigo.geneontology.org/cgi-bin/amigo/term_details?term=GO:0005623
intracellular	Gene Ontology	GO:0005622	953	11177	1.11497e-39	2.43454e-36	ENSMUSG00000053198|ENSMUSG00000029510|ENSMUSG00000002017|ENSMUSG00000029517|ENSMUSG00000032010|ENSMUSG00000029273|ENSMUSG00000049892|ENSMUSG00000021712|ENSMUSG00000059327|ENSMUSG00000003970|ENSMUSG00000031586|ENSMUSG00000003184|ENSMUSG00000028341|ENSMUSG00000030110|ENSMUSG00000041975|ENSMUSG00000026491|ENSMUSG00000037242|ENSMUSG00000041272|ENSMUSG00000023286|ENSMUSG00000026180|ENSMUSG00000030849|…	http://amigo.geneontology.org/cgi-bin/amigo/term_details?term=GO:0005622
intracellular part	Gene Ontology	GO:0044424	945	11083	5.1233e-39	8.94938e-36	ENSMUSG00000053198|ENSMUSG00000029510|ENSMUSG00000002017|ENSMUSG00000029517|ENSMUSG00000032010|ENSMUSG00000029273|ENSMUSG00000049892|ENSMUSG00000021712|ENSMUSG00000059327|ENSMUSG00000003970|ENSMUSG00000031586|ENSMUSG00000003184|ENSMUSG00000028341|ENSMUSG00000030110|ENSMUSG00000041975|ENSMUSG00000026491|ENSMUSG00000037242|ENSMUSG00000041272|ENSMUSG00000023286|ENSMUSG00000026180|ENSMUSG00000030849|…	http://amigo.geneontology.org/cgi-bin/amigo/term_details?term=GO:0044424
regulation of biological process	Gene Ontology	GO:0050789	766	8311	2.94667e-38	4.28936e-35	ENSMUSG00000053198|ENSMUSG00000029510|ENSMUSG00000026491|ENSMUSG00000032010|ENSMUSG00000049892|ENSMUSG00000021712|ENSMUSG00000059327|ENSMUSG00000058624|ENSMUSG00000031586|ENSMUSG00000050558|ENSMUSG00000028341|ENSMUSG00000030110|ENSMUSG00000041974|ENSMUSG00000037242|ENSMUSG00000030649|ENSMUSG00000023286|ENSMUSG00000026180|ENSMUSG00000030849|ENSMUSG00000028933|ENSMUSG00000030847|ENSMUSG00000023367|…	http://amigo.geneontology.org/cgi-bin/amigo/term_details?term=GO:0050789
cellular process	Gene Ontology	GO:0009987	979	11700	4.72904e-38	5.90049e-35	ENSMUSG00000053198|ENSMUSG00000029510|ENSMUSG00000026491|ENSMUSG00000032010|ENSMUSG00000029273|ENSMUSG00000049892|ENSMUSG00000021712|ENSMUSG00000059327|ENSMUSG00000058624|ENSMUSG00000031586|ENSMUSG00000050558|ENSMUSG00000028341|ENSMUSG00000030110|ENSMUSG00000041975|ENSMUSG00000041974|ENSMUSG00000037242|ENSMUSG00000023286|ENSMUSG00000026180|ENSMUSG00000030849|ENSMUSG00000028933|ENSMUSG00000045545|…	http://amigo.geneontology.org/cgi-bin/amigo/term_details?term=GO:0009987
biological regulation	Gene Ontology	GO:0065007	791	8737	2.1416e-37	2.33809e-34	ENSMUSG00000053198|ENSMUSG00000029510|ENSMUSG00000026491|ENSMUSG00000032010|ENSMUSG00000049892|ENSMUSG00000021712|ENSMUSG00000059327|ENSMUSG00000058624|ENSMUSG00000031586|ENSMUSG00000050558|ENSMUSG00000028341|ENSMUSG00000030110|ENSMUSG00000041974|ENSMUSG00000037242|ENSMUSG00000030649|ENSMUSG00000023286|ENSMUSG00000026180|ENSMUSG00000030849|ENSMUSG00000028933|ENSMUSG00000030847|ENSMUSG00000023367|…	http://amigo.geneontology.org/cgi-bin/amigo/term_details?term=GO:0065007
regulation of cellular process	Gene Ontology	GO:0050794	729	7861	2.66111e-36	2.58246e-33	ENSMUSG00000053198|ENSMUSG00000029510|ENSMUSG00000026491|ENSMUSG00000032010|ENSMUSG00000049892|ENSMUSG00000021712|ENSMUSG00000059327|ENSMUSG00000058624|ENSMUSG00000031586|ENSMUSG00000050558|ENSMUSG00000028341|ENSMUSG00000030110|ENSMUSG00000041974|ENSMUSG00000037242|ENSMUSG00000023286|ENSMUSG00000026180|ENSMUSG00000030849|ENSMUSG00000028933|ENSMUSG00000030847|ENSMUSG00000023367|ENSMUSG00000004054|…	http://amigo.geneontology.org/cgi-bin/amigo/term_details?term=GO:0050794
single-organism process	Gene Ontology	GO:0044699	886	10288	3.16241e-36	2.76205e-33	ENSMUSG00000053198|ENSMUSG00000029510|ENSMUSG00000026491|ENSMUSG00000032010|ENSMUSG00000029273|ENSMUSG00000049892|ENSMUSG00000021712|ENSMUSG00000059327|ENSMUSG00000058624|ENSMUSG00000031586|ENSMUSG00000050558|ENSMUSG00000028341|ENSMUSG00000030110|ENSMUSG00000041975|ENSMUSG00000037242|ENSMUSG00000023286|ENSMUSG00000026180|ENSMUSG00000030849|ENSMUSG00000028933|ENSMUSG00000045545|ENSMUSG00000030847|…	http://amigo.geneontology.org/cgi-bin/amigo/term_details?term=GO:0044699
protein binding	Gene Ontology	GO:0005515	661	6985	5.38175e-34	4.27311e-31	ENSMUSG00000053198|ENSMUSG00000032010|ENSMUSG00000049892|ENSMUSG00000021712|ENSMUSG00000059327|ENSMUSG00000058624|ENSMUSG00000031586|ENSMUSG00000028341|ENSMUSG00000030110|ENSMUSG00000037242|ENSMUSG00000023286|ENSMUSG00000030849|ENSMUSG00000028933|ENSMUSG00000049940|ENSMUSG00000045545|ENSMUSG00000030847|ENSMUSG00000023367|ENSMUSG00000004054|ENSMUSG00000030595|ENSMUSG00000004698|ENSMUSG00000019777|…	http://amigo.geneontology.org/cgi-bin/amigo/term_details?term=GO:0005515
organelle	Gene Ontology	GO:0043226	896	10598	1.06744e-33	7.76917e-31	ENSMUSG00000053198|ENSMUSG00000029510|ENSMUSG00000026491|ENSMUSG00000029517|ENSMUSG00000023923|ENSMUSG00000049892|ENSMUSG00000021712|ENSMUSG00000059327|ENSMUSG00000058624|ENSMUSG00000031586|ENSMUSG00000028341|ENSMUSG00000030110|ENSMUSG00000041975|ENSMUSG00000041974|ENSMUSG00000037242|ENSMUSG00000041272|ENSMUSG00000023286|ENSMUSG00000026180|ENSMUSG00000030849|ENSMUSG00000028933|ENSMUSG00000049940|…	http://amigo.geneontology.org/cgi-bin/amigo/term_details?term=GO:0043226
cytoplasm	Gene Ontology	GO:0005737	774	8864	1.14966e-30	6.81061e-28	ENSMUSG00000053198|ENSMUSG00000029510|ENSMUSG00000026491|ENSMUSG00000032010|ENSMUSG00000029273|ENSMUSG00000049892|ENSMUSG00000021712|ENSMUSG00000059327|ENSMUSG00000003970|ENSMUSG00000031586|ENSMUSG00000003184|ENSMUSG00000016528|ENSMUSG00000030110|ENSMUSG00000041975|ENSMUSG00000037242|ENSMUSG00000023286|ENSMUSG00000026180|ENSMUSG00000030849|ENSMUSG00000028776|ENSMUSG00000030847|ENSMUSG00000004054|…	http://amigo.geneontology.org/cgi-bin/amigo/term_details?term=GO:0005737
membrane-bounded organelle	Gene Ontology	GO:0043227	837	9845	1.16841e-30	6.81061e-28	ENSMUSG00000053198|ENSMUSG00000029510|ENSMUSG00000026491|ENSMUSG00000029517|ENSMUSG00000023923|ENSMUSG00000049892|ENSMUSG00000021712|ENSMUSG00000059327|ENSMUSG00000058624|ENSMUSG00000031586|ENSMUSG00000028341|ENSMUSG00000030110|ENSMUSG00000041975|ENSMUSG00000041974|ENSMUSG00000037242|ENSMUSG00000041272|ENSMUSG00000023286|ENSMUSG00000026180|ENSMUSG00000030849|ENSMUSG00000028933|ENSMUSG00000049940|…	http://amigo.geneontology.org/cgi-bin/amigo/term_details?term=GO:0043227
single-organism cellular process	Gene Ontology	GO:0044763	796	9204	1.16967e-30	6.81061e-28	ENSMUSG00000053198|ENSMUSG00000029510|ENSMUSG00000026491|ENSMUSG00000032010|ENSMUSG00000049892|ENSMUSG00000021712|ENSMUSG00000059327|ENSMUSG00000058624|ENSMUSG00000031586|ENSMUSG00000050558|ENSMUSG00000028341|ENSMUSG00000030110|ENSMUSG00000041975|ENSMUSG00000037242|ENSMUSG00000023286|ENSMUSG00000026180|ENSMUSG00000030849|ENSMUSG00000028933|ENSMUSG00000045545|ENSMUSG00000030847|ENSMUSG00000023367|…	http://amigo.geneontology.org/cgi-bin/amigo/term_details?term=GO:0044763
intracellular organelle	Gene Ontology	GO:0043229	820	9665	2.82357e-29	1.54132e-26	ENSMUSG00000053198|ENSMUSG00000029510|ENSMUSG00000026491|ENSMUSG00000029517|ENSMUSG00000023923|ENSMUSG00000049892|ENSMUSG00000021712|ENSMUSG00000059327|ENSMUSG00000003970|ENSMUSG00000031586|ENSMUSG00000028341|ENSMUSG00000030110|ENSMUSG00000041975|ENSMUSG00000041974|ENSMUSG00000037242|ENSMUSG00000041272|ENSMUSG00000023286|ENSMUSG00000026180|ENSMUSG00000030849|ENSMUSG00000028933|ENSMUSG00000049940|…	http://amigo.geneontology.org/cgi-bin/amigo/term_details?term=GO:0043229
cellular metabolic process	Gene Ontology	GO:0044237	682	7716	1.05743e-26	5.43271e-24	ENSMUSG00000053198|ENSMUSG00000026491|ENSMUSG00000023923|ENSMUSG00000029273|ENSMUSG00000049892|ENSMUSG00000021712|ENSMUSG00000058624|ENSMUSG00000031586|ENSMUSG00000003184|ENSMUSG00000028341|ENSMUSG00000030110|ENSMUSG00000041975|ENSMUSG00000041974|ENSMUSG00000045005|ENSMUSG00000023286|ENSMUSG00000026180|ENSMUSG00000030849|ENSMUSG00000028933|ENSMUSG00000000167|ENSMUSG00000038582|ENSMUSG00000004698|…	http://amigo.geneontology.org/cgi-bin/amigo/term_details?term=GO:0044237
metabolic process	Gene Ontology	GO:0008152	735	8538	2.30933e-26	1.12054e-23	ENSMUSG00000053198|ENSMUSG00000026491|ENSMUSG00000023923|ENSMUSG00000029273|ENSMUSG00000049892|ENSMUSG00000021712|ENSMUSG00000059327|ENSMUSG00000058624|ENSMUSG00000031586|ENSMUSG00000003184|ENSMUSG00000028341|ENSMUSG00000030110|ENSMUSG00000041975|ENSMUSG00000041974|ENSMUSG00000045005|ENSMUSG00000023286|ENSMUSG00000026180|ENSMUSG00000030849|ENSMUSG00000028933|ENSMUSG00000028776|ENSMUSG00000000167|…	http://amigo.geneontology.org/cgi-bin/amigo/term_details?term=GO:0008152
organic substance metabolic process	Gene Ontology	GO:0071704	708	8162	7.71721e-26	3.54748e-23	ENSMUSG00000053198|ENSMUSG00000026491|ENSMUSG00000023923|ENSMUSG00000029273|ENSMUSG00000049892|ENSMUSG00000021712|ENSMUSG00000059327|ENSMUSG00000058624|ENSMUSG00000031586|ENSMUSG00000003184|ENSMUSG00000028341|ENSMUSG00000030110|ENSMUSG00000041975|ENSMUSG00000041974|ENSMUSG00000045005|ENSMUSG00000023286|ENSMUSG00000026180|ENSMUSG00000030849|ENSMUSG00000028933|ENSMUSG00000028776|ENSMUSG00000000167|…	http://amigo.geneontology.org/cgi-bin/amigo/term_details?term=GO:0071704
intracellular membrane-bounded organelle	Gene Ontology	GO:0043231	747	8811	5.06042e-25	2.20989e-22	ENSMUSG00000053198|ENSMUSG00000029510|ENSMUSG00000026491|ENSMUSG00000029517|ENSMUSG00000023923|ENSMUSG00000059325|ENSMUSG00000021712|ENSMUSG00000059327|ENSMUSG00000003970|ENSMUSG00000031586|ENSMUSG00000028341|ENSMUSG00000030110|ENSMUSG00000041975|ENSMUSG00000041974|ENSMUSG00000037242|ENSMUSG00000041272|ENSMUSG00000023286|ENSMUSG00000026180|ENSMUSG00000030849|ENSMUSG00000028933|ENSMUSG00000049940|…	http://amigo.geneontology.org/cgi-bin/amigo/term_details?term=GO:0043231
cellular macromolecule metabolic process	Gene Ontology	GO:0044260	573	6252	1.49773e-24	6.22913e-22	ENSMUSG00000053198|ENSMUSG00000026491|ENSMUSG00000023923|ENSMUSG00000049892|ENSMUSG00000021712|ENSMUSG00000003970|ENSMUSG00000031586|ENSMUSG00000003184|ENSMUSG00000028341|ENSMUSG00000030110|ENSMUSG00000041975|ENSMUSG00000041974|ENSMUSG00000045005|ENSMUSG00000023286|ENSMUSG00000026180|ENSMUSG00000030849|ENSMUSG00000028933|ENSMUSG00000000167|ENSMUSG00000038582|ENSMUSG00000004698|ENSMUSG00000019777|…	http://amigo.geneontology.org/cgi-bin/amigo/term_details?term=GO:0044260
regulation of metabolic process	Gene Ontology	GO:0019222	464	4731	2.10962e-24	8.37519e-22	ENSMUSG00000053198|ENSMUSG00000026491|ENSMUSG00000023923|ENSMUSG00000049892|ENSMUSG00000028023|ENSMUSG00000059327|ENSMUSG00000031586|ENSMUSG00000010760|ENSMUSG00000028341|ENSMUSG00000030110|ENSMUSG00000041974|ENSMUSG00000045005|ENSMUSG00000030849|ENSMUSG00000004054|ENSMUSG00000004698|ENSMUSG00000019777|ENSMUSG00000015120|ENSMUSG00000063142|ENSMUSG00000027947|ENSMUSG00000059325|ENSMUSG00000024042|…	http://amigo.geneontology.org/cgi-bin/amigo/term_details?term=GO:0019222
primary metabolic process	Gene Ontology	GO:0044238	673	7757	5.47102e-24	2.07756e-21	ENSMUSG00000053198|ENSMUSG00000026491|ENSMUSG00000029273|ENSMUSG00000049892|ENSMUSG00000021712|ENSMUSG00000058624|ENSMUSG00000031586|ENSMUSG00000003184|ENSMUSG00000028341|ENSMUSG00000030110|ENSMUSG00000041975|ENSMUSG00000041974|ENSMUSG00000045005|ENSMUSG00000023286|ENSMUSG00000030849|ENSMUSG00000028933|ENSMUSG00000028776|ENSMUSG00000000167|ENSMUSG00000038582|ENSMUSG00000004698|ENSMUSG00000019777|…	http://amigo.geneontology.org/cgi-bin/amigo/term_details?term=GO:0044238
regulation of cellular metabolic process	Gene Ontology	GO:0031323	442	4457	6.19878e-24	2.25071e-21	ENSMUSG00000053198|ENSMUSG00000026491|ENSMUSG00000023923|ENSMUSG00000049892|ENSMUSG00000028023|ENSMUSG00000031586|ENSMUSG00000010760|ENSMUSG00000028341|ENSMUSG00000030110|ENSMUSG00000041974|ENSMUSG00000045005|ENSMUSG00000030849|ENSMUSG00000004054|ENSMUSG00000004698|ENSMUSG00000019777|ENSMUSG00000015120|ENSMUSG00000063142|ENSMUSG00000027947|ENSMUSG00000059325|ENSMUSG00000024042|ENSMUSG00000059146|…	http://amigo.geneontology.org/cgi-bin/amigo/term_details?term=GO:0031323
macromolecule metabolic process	Gene Ontology	GO:0043170	611	6843	6.44239e-24	2.25071e-21	ENSMUSG00000053198|ENSMUSG00000026491|ENSMUSG00000023923|ENSMUSG00000049892|ENSMUSG00000021712|ENSMUSG00000059327|ENSMUSG00000003970|ENSMUSG00000031586|ENSMUSG00000003184|ENSMUSG00000028341|ENSMUSG00000030110|ENSMUSG00000041975|ENSMUSG00000041974|ENSMUSG00000045005|ENSMUSG00000023286|ENSMUSG00000026180|ENSMUSG00000030849|ENSMUSG00000028933|ENSMUSG00000028776|ENSMUSG00000000167|ENSMUSG00000038582|…	http://amigo.geneontology.org/cgi-bin/amigo/term_details?term=GO:0043170
regulation of macromolecule metabolic process	Gene Ontology	GO:0060255	437	4413	1.70389e-23	5.72375e-21	ENSMUSG00000053198|ENSMUSG00000026491|ENSMUSG00000023923|ENSMUSG00000049892|ENSMUSG00000028023|ENSMUSG00000059327|ENSMUSG00000031586|ENSMUSG00000010760|ENSMUSG00000028341|ENSMUSG00000030110|ENSMUSG00000041974|ENSMUSG00000045005|ENSMUSG00000030849|ENSMUSG00000004054|ENSMUSG00000004698|ENSMUSG00000019777|ENSMUSG00000015120|ENSMUSG00000027947|ENSMUSG00000059325|ENSMUSG00000024042|ENSMUSG00000059146|…	http://amigo.geneontology.org/cgi-bin/amigo/term_details?term=GO:0060255
positive regulation of biological process	Gene Ontology	GO:0048518	436	4443	1.06358e-22	3.4405e-20	ENSMUSG00000023923|ENSMUSG00000059325|ENSMUSG00000028023|ENSMUSG00000059327|ENSMUSG00000058624|ENSMUSG00000031586|ENSMUSG00000028341|ENSMUSG00000030110|ENSMUSG00000041974|ENSMUSG00000045005|ENSMUSG00000023286|ENSMUSG00000026180|ENSMUSG00000030849|ENSMUSG00000028933|ENSMUSG00000004054|ENSMUSG00000004698|ENSMUSG00000019777|ENSMUSG00000015120|ENSMUSG00000063142|ENSMUSG00000027947|ENSMUSG00000022353|…	http://amigo.geneontology.org/cgi-bin/amigo/term_details?term=GO:0048518
regulation of primary metabolic process	Gene Ontology	GO:0080090	429	4416	1.74856e-21	5.27124e-19	ENSMUSG00000053198|ENSMUSG00000026491|ENSMUSG00000049892|ENSMUSG00000028023|ENSMUSG00000031586|ENSMUSG00000010760|ENSMUSG00000028341|ENSMUSG00000030110|ENSMUSG00000041974|ENSMUSG00000045005|ENSMUSG00000030849|ENSMUSG00000004054|ENSMUSG00000004698|ENSMUSG00000019777|ENSMUSG00000015120|ENSMUSG00000063142|ENSMUSG00000027947|ENSMUSG00000059325|ENSMUSG00000024042|ENSMUSG00000059146|ENSMUSG00000014303|…	http://amigo.geneontology.org/cgi-bin/amigo/term_details?term=GO:0080090
response to stimulus	Gene Ontology	GO:0050896	554	6172	1.75024e-21	5.27124e-19	ENSMUSG00000029510|ENSMUSG00000040415|ENSMUSG00000049892|ENSMUSG00000021712|ENSMUSG00000059327|ENSMUSG00000031586|ENSMUSG00000050558|ENSMUSG00000028341|ENSMUSG00000030110|ENSMUSG00000041974|ENSMUSG00000037242|ENSMUSG00000023286|ENSMUSG00000030849|ENSMUSG00000028933|ENSMUSG00000028776|ENSMUSG00000030847|ENSMUSG00000004054|ENSMUSG00000032336|ENSMUSG00000030249|ENSMUSG00000030595|ENSMUSG00000004698|…	http://amigo.geneontology.org/cgi-bin/amigo/term_details?term=GO:0050896
signaling	Gene Ontology	GO:0023052	425	4363	1.85718e-21	5.40687e-19	ENSMUSG00000053198|ENSMUSG00000029510|ENSMUSG00000049892|ENSMUSG00000021712|ENSMUSG00000059327|ENSMUSG00000031586|ENSMUSG00000050558|ENSMUSG00000028341|ENSMUSG00000030110|ENSMUSG00000045005|ENSMUSG00000030849|ENSMUSG00000030847|ENSMUSG00000004054|ENSMUSG00000032336|ENSMUSG00000030595|ENSMUSG00000019777|ENSMUSG00000015120|ENSMUSG00000063142|ENSMUSG00000027947|ENSMUSG00000024042|ENSMUSG00000024043|…	http://amigo.geneontology.org/cgi-bin/amigo/term_details?term=GO:0023052
single organism signaling	Gene Ontology	GO:0044700	423	4356	4.20791e-21	1.1623e-18	ENSMUSG00000053198|ENSMUSG00000029510|ENSMUSG00000049892|ENSMUSG00000021712|ENSMUSG00000059327|ENSMUSG00000031586|ENSMUSG00000050558|ENSMUSG00000028341|ENSMUSG00000030110|ENSMUSG00000045005|ENSMUSG00000030849|ENSMUSG00000030847|ENSMUSG00000004054|ENSMUSG00000032336|ENSMUSG00000030595|ENSMUSG00000019777|ENSMUSG00000015120|ENSMUSG00000063142|ENSMUSG00000027947|ENSMUSG00000024042|ENSMUSG00000024043|…	http://amigo.geneontology.org/cgi-bin/amigo/term_details?term=GO:0044700
positive regulation of cellular process	Gene Ontology	GO:0048522	398	4018	4.25847e-21	1.1623e-18	ENSMUSG00000023923|ENSMUSG00000059325|ENSMUSG00000028023|ENSMUSG00000059327|ENSMUSG00000058624|ENSMUSG00000031586|ENSMUSG00000028341|ENSMUSG00000030110|ENSMUSG00000041974|ENSMUSG00000045005|ENSMUSG00000023286|ENSMUSG00000026180|ENSMUSG00000030849|ENSMUSG00000028933|ENSMUSG00000004054|ENSMUSG00000004698|ENSMUSG00000019777|ENSMUSG00000015120|ENSMUSG00000063142|ENSMUSG00000027947|ENSMUSG00000022353|…	http://amigo.geneontology.org/cgi-bin/amigo/term_details?term=GO:0048522
cell communication	Gene Ontology	GO:0007154	426	4414	8.32499e-21	2.20335e-18	ENSMUSG00000053198|ENSMUSG00000029510|ENSMUSG00000049892|ENSMUSG00000021712|ENSMUSG00000059327|ENSMUSG00000031586|ENSMUSG00000050558|ENSMUSG00000028341|ENSMUSG00000030110|ENSMUSG00000045005|ENSMUSG00000030849|ENSMUSG00000030847|ENSMUSG00000004054|ENSMUSG00000032336|ENSMUSG00000030595|ENSMUSG00000019777|ENSMUSG00000015120|ENSMUSG00000063142|ENSMUSG00000027947|ENSMUSG00000024042|ENSMUSG00000024043|…	http://amigo.geneontology.org/cgi-bin/amigo/term_details?term=GO:0007154
cellular response to stimulus	Gene Ontology	GO:0051716	471	5047	1.26048e-20	3.23796e-18	ENSMUSG00000029510|ENSMUSG00000023923|ENSMUSG00000049892|ENSMUSG00000021712|ENSMUSG00000059327|ENSMUSG00000031586|ENSMUSG00000050558|ENSMUSG00000028341|ENSMUSG00000030110|ENSMUSG00000041974|ENSMUSG00000037242|ENSMUSG00000023286|ENSMUSG00000030849|ENSMUSG00000028933|ENSMUSG00000030847|ENSMUSG00000004054|ENSMUSG00000032336|ENSMUSG00000030595|ENSMUSG00000004698|ENSMUSG00000019777|ENSMUSG00000015120|…	http://amigo.geneontology.org/cgi-bin/amigo/term_details?term=GO:0051716
nucleus	Gene Ontology	GO:0005634	500	5509	8.59728e-20	2.14539e-17	ENSMUSG00000053198|ENSMUSG00000026491|ENSMUSG00000029517|ENSMUSG00000049892|ENSMUSG00000021712|ENSMUSG00000003970|ENSMUSG00000031586|ENSMUSG00000028341|ENSMUSG00000041975|ENSMUSG00000041974|ENSMUSG00000037242|ENSMUSG00000041272|ENSMUSG00000030849|ENSMUSG00000028933|ENSMUSG00000049940|ENSMUSG00000030595|ENSMUSG00000004698|ENSMUSG00000019777|ENSMUSG00000015120|ENSMUSG00000028878|ENSMUSG00000059325|…	http://amigo.geneontology.org/cgi-bin/amigo/term_details?term=GO:0005634
signal transduction	Gene Ontology	GO:0007165	390	4022	4.00496e-19	9.71647e-17	ENSMUSG00000029510|ENSMUSG00000049892|ENSMUSG00000021712|ENSMUSG00000059327|ENSMUSG00000031586|ENSMUSG00000050558|ENSMUSG00000028341|ENSMUSG00000030110|ENSMUSG00000045005|ENSMUSG00000030849|ENSMUSG00000030847|ENSMUSG00000004054|ENSMUSG00000032336|ENSMUSG00000030595|ENSMUSG00000019777|ENSMUSG00000015120|ENSMUSG00000027947|ENSMUSG00000024042|ENSMUSG00000024043|ENSMUSG00000030204|ENSMUSG00000092035|…	http://amigo.geneontology.org/cgi-bin/amigo/term_details?term=GO:0007165
nitrogen compound metabolic process	Gene Ontology	GO:0006807	465	5080	8.87732e-19	2.09553e-16	ENSMUSG00000053198|ENSMUSG00000026491|ENSMUSG00000029273|ENSMUSG00000049892|ENSMUSG00000028023|ENSMUSG00000058624|ENSMUSG00000031586|ENSMUSG00000028341|ENSMUSG00000030110|ENSMUSG00000041974|ENSMUSG00000045005|ENSMUSG00000030849|ENSMUSG00000028933|ENSMUSG00000000167|ENSMUSG00000004698|ENSMUSG00000019777|ENSMUSG00000015120|ENSMUSG00000059325|ENSMUSG00000024042|ENSMUSG00000030204|ENSMUSG00000038256|…	http://amigo.geneontology.org/cgi-bin/amigo/term_details?term=GO:0006807
single-multicellular organism process	Gene Ontology	GO:0044707	458	4985	1.002e-18	2.30302e-16	ENSMUSG00000053198|ENSMUSG00000029510|ENSMUSG00000026491|ENSMUSG00000059325|ENSMUSG00000028023|ENSMUSG00000059327|ENSMUSG00000010760|ENSMUSG00000028341|ENSMUSG00000030110|ENSMUSG00000041975|ENSMUSG00000037242|ENSMUSG00000040841|ENSMUSG00000030849|ENSMUSG00000028933|ENSMUSG00000023367|ENSMUSG00000032336|ENSMUSG00000004698|ENSMUSG00000019777|ENSMUSG00000015120|ENSMUSG00000063142|ENSMUSG00000027947|…	http://amigo.geneontology.org/cgi-bin/amigo/term_details?term=GO:0044707
membrane	Gene Ontology	GO:0016020	610	7188	1.06152e-18	2.37726e-16	ENSMUSG00000053198|ENSMUSG00000029510|ENSMUSG00000026491|ENSMUSG00000023923|ENSMUSG00000092586|ENSMUSG00000049892|ENSMUSG00000021712|ENSMUSG00000059327|ENSMUSG00000003970|ENSMUSG00000050558|ENSMUSG00000030110|ENSMUSG00000037242|ENSMUSG00000023286|ENSMUSG00000030849|ENSMUSG00000049940|ENSMUSG00000030847|ENSMUSG00000023367|ENSMUSG00000004054|ENSMUSG00000018672|ENSMUSG00000032336|ENSMUSG00000030249|…	http://amigo.geneontology.org/cgi-bin/amigo/term_details?term=GO:0016020
multicellular organismal process	Gene Ontology	GO:0032501	491	5496	4.49616e-18	9.81738e-16	ENSMUSG00000053198|ENSMUSG00000029510|ENSMUSG00000026491|ENSMUSG00000059325|ENSMUSG00000028023|ENSMUSG00000059327|ENSMUSG00000003184|ENSMUSG00000028341|ENSMUSG00000030110|ENSMUSG00000041975|ENSMUSG00000037242|ENSMUSG00000026180|ENSMUSG00000030849|ENSMUSG00000028933|ENSMUSG00000023367|ENSMUSG00000032336|ENSMUSG00000004698|ENSMUSG00000019777|ENSMUSG00000015120|ENSMUSG00000063142|ENSMUSG00000024049|…	http://amigo.geneontology.org/cgi-bin/amigo/term_details?term=GO:0032501
localization	Gene Ontology	GO:0051179	441	4794	5.3436e-18	1.13832e-15	ENSMUSG00000026491|ENSMUSG00000023923|ENSMUSG00000028023|ENSMUSG00000059327|ENSMUSG00000031586|ENSMUSG00000046027|ENSMUSG00000028341|ENSMUSG00000030110|ENSMUSG00000041974|ENSMUSG00000037242|ENSMUSG00000023286|ENSMUSG00000030849|ENSMUSG00000018672|ENSMUSG00000032336|ENSMUSG00000030595|ENSMUSG00000031904|ENSMUSG00000063142|ENSMUSG00000028238|ENSMUSG00000024042|ENSMUSG00000059146|ENSMUSG00000014303|…	http://amigo.geneontology.org/cgi-bin/amigo/term_details?term=GO:0051179
regulation of response to stimulus	Gene Ontology	GO:0048583	292	2796	7.43834e-18	1.54682e-15	ENSMUSG00000048583|ENSMUSG00000024039|ENSMUSG00000050395|ENSMUSG00000027540|ENSMUSG00000031603|ENSMUSG00000059325|ENSMUSG00000025856|ENSMUSG00000037573|ENSMUSG00000031586|ENSMUSG00000020696|ENSMUSG00000028341|ENSMUSG00000030110|ENSMUSG00000041974|ENSMUSG00000045005|ENSMUSG00000029203|ENSMUSG00000026074|ENSMUSG00000045671|ENSMUSG00000030849|ENSMUSG00000004814|ENSMUSG00000004054|ENSMUSG00000020782|…	http://amigo.geneontology.org/cgi-bin/amigo/term_details?term=GO:0048583
regulation of nitrogen compound metabolic process	Gene Ontology	GO:0051171	325	3227	7.90899e-18	1.60644e-15	ENSMUSG00000048583|ENSMUSG00000053198|ENSMUSG00000020300|ENSMUSG00000026491|ENSMUSG00000021660|ENSMUSG00000006575|ENSMUSG00000004535|ENSMUSG00000049892|ENSMUSG00000030350|ENSMUSG00000025856|ENSMUSG00000037573|ENSMUSG00000075701|ENSMUSG00000031586|ENSMUSG00000036923|ENSMUSG00000024352|ENSMUSG00000036144|ENSMUSG00000028341|ENSMUSG00000030110|ENSMUSG00000041974|ENSMUSG00000029207|ENSMUSG00000020454|…	http://amigo.geneontology.org/cgi-bin/amigo/term_details?term=GO:0051171
negative regulation of biological process	Gene Ontology	GO:0048519	370	3860	2.74341e-17	5.44567e-15	ENSMUSG00000049892|ENSMUSG00000028631|ENSMUSG00000028341|ENSMUSG00000037242|ENSMUSG00000056978|ENSMUSG00000026180|ENSMUSG00000030849|ENSMUSG00000028933|ENSMUSG00000030847|ENSMUSG00000023367|ENSMUSG00000030595|ENSMUSG00000004698|ENSMUSG00000019777|ENSMUSG00000015120|ENSMUSG00000063142|ENSMUSG00000022353|ENSMUSG00000059325|ENSMUSG00000024042|ENSMUSG00000024043|ENSMUSG00000014303|ENSMUSG00000092035|…	http://amigo.geneontology.org/cgi-bin/amigo/term_details?term=GO:0048519
gene expression	Gene Ontology	GO:0010467	381	4015	3.33895e-17	6.48052e-15	ENSMUSG00000053198|ENSMUSG00000026491|ENSMUSG00000049892|ENSMUSG00000028023|ENSMUSG00000059327|ENSMUSG00000003970|ENSMUSG00000031586|ENSMUSG00000010760|ENSMUSG00000028341|ENSMUSG00000030110|ENSMUSG00000045005|ENSMUSG00000030849|ENSMUSG00000000167|ENSMUSG00000004698|ENSMUSG00000019777|ENSMUSG00000015120|ENSMUSG00000059325|ENSMUSG00000024042|ENSMUSG00000059146|ENSMUSG00000030204|ENSMUSG00000038256|…	http://amigo.geneontology.org/cgi-bin/amigo/term_details?term=GO:0010467
intracellular signal transduction	Gene Ontology	GO:0035556	226	2013	7.18674e-17	1.36454e-14	ENSMUSG00000048583|ENSMUSG00000024070|ENSMUSG00000050395|ENSMUSG00000027540|ENSMUSG00000049892|ENSMUSG00000021712|ENSMUSG00000025856|ENSMUSG00000075701|ENSMUSG00000020696|ENSMUSG00000016528|ENSMUSG00000030110|ENSMUSG00000029055|ENSMUSG00000045005|ENSMUSG00000029203|ENSMUSG00000033335|ENSMUSG00000030849|ENSMUSG00000004814|ENSMUSG00000022176|ENSMUSG00000004054|ENSMUSG00000017548|ENSMUSG00000025504|…	http://amigo.geneontology.org/cgi-bin/amigo/term_details?term=GO:0035556
regulation of signaling	Gene Ontology	GO:0023051	258	2417	9.15293e-17	1.70089e-14	ENSMUSG00000048583|ENSMUSG00000024039|ENSMUSG00000050395|ENSMUSG00000026637|ENSMUSG00000027540|ENSMUSG00000031603|ENSMUSG00000025856|ENSMUSG00000031586|ENSMUSG00000020696|ENSMUSG00000028631|ENSMUSG00000030110|ENSMUSG00000045005|ENSMUSG00000029203|ENSMUSG00000033014|ENSMUSG00000031785|ENSMUSG00000030849|ENSMUSG00000004814|ENSMUSG00000004054|ENSMUSG00000017548|ENSMUSG00000025504|ENSMUSG00000032336|…	http://amigo.geneontology.org/cgi-bin/amigo/term_details?term=GO:0023051
cellular nitrogen compound metabolic process	Gene Ontology	GO:0034641	434	4783	1.08997e-16	1.98328e-14	ENSMUSG00000053198|ENSMUSG00000026491|ENSMUSG00000049892|ENSMUSG00000028023|ENSMUSG00000058624|ENSMUSG00000031586|ENSMUSG00000028341|ENSMUSG00000030110|ENSMUSG00000041974|ENSMUSG00000045005|ENSMUSG00000030849|ENSMUSG00000028933|ENSMUSG00000000167|ENSMUSG00000004698|ENSMUSG00000019777|ENSMUSG00000015120|ENSMUSG00000059325|ENSMUSG00000024042|ENSMUSG00000030204|ENSMUSG00000038256|ENSMUSG00000003970|…	http://amigo.geneontology.org/cgi-bin/amigo/term_details?term=GO:0034641
regulation of cell communication	Gene Ontology	GO:0010646	256	2398	1.22737e-16	2.18773e-14	ENSMUSG00000048583|ENSMUSG00000024039|ENSMUSG00000050395|ENSMUSG00000027540|ENSMUSG00000031603|ENSMUSG00000025856|ENSMUSG00000031586|ENSMUSG00000020696|ENSMUSG00000028631|ENSMUSG00000030110|ENSMUSG00000045005|ENSMUSG00000029203|ENSMUSG00000033014|ENSMUSG00000031785|ENSMUSG00000030849|ENSMUSG00000004814|ENSMUSG00000004054|ENSMUSG00000017548|ENSMUSG00000025504|ENSMUSG00000032336|ENSMUSG00000030595|…	http://amigo.geneontology.org/cgi-bin/amigo/term_details?term=GO:0010646
regulation of gene expression	Gene Ontology	GO:0010468	316	3182	1.65007e-16	2.88233e-14	ENSMUSG00000048583|ENSMUSG00000053198|ENSMUSG00000020300|ENSMUSG00000026491|ENSMUSG00000021660|ENSMUSG00000054967|ENSMUSG00000049892|ENSMUSG00000030350|ENSMUSG00000059327|ENSMUSG00000037573|ENSMUSG00000031586|ENSMUSG00000036923|ENSMUSG00000024352|ENSMUSG00000003184|ENSMUSG00000028341|ENSMUSG00000030110|ENSMUSG00000029207|ENSMUSG00000020454|ENSMUSG00000045005|ENSMUSG00000058301|ENSMUSG00000033014|…	http://amigo.geneontology.org/cgi-bin/amigo/term_details?term=GO:0010468
regulation of nucleobase-containing compound metabolic process	Gene Ontology	GO:0019219	303	3018	2.23041e-16	3.76818e-14	ENSMUSG00000048583|ENSMUSG00000053198|ENSMUSG00000026491|ENSMUSG00000021660|ENSMUSG00000006575|ENSMUSG00000004535|ENSMUSG00000049892|ENSMUSG00000030350|ENSMUSG00000025856|ENSMUSG00000037573|ENSMUSG00000031586|ENSMUSG00000036923|ENSMUSG00000024352|ENSMUSG00000036144|ENSMUSG00000028341|ENSMUSG00000030110|ENSMUSG00000041974|ENSMUSG00000029207|ENSMUSG00000045639|ENSMUSG00000045005|ENSMUSG00000058301|…	http://amigo.geneontology.org/cgi-bin/amigo/term_details?term=GO:0019219
biosynthetic process	Gene Ontology	GO:0009058	416	4552	2.24348e-16	3.76818e-14	ENSMUSG00000026491|ENSMUSG00000049892|ENSMUSG00000021712|ENSMUSG00000003970|ENSMUSG00000031586|ENSMUSG00000028341|ENSMUSG00000030110|ENSMUSG00000045005|ENSMUSG00000030849|ENSMUSG00000004698|ENSMUSG00000019777|ENSMUSG00000015120|ENSMUSG00000074207|ENSMUSG00000059325|ENSMUSG00000024042|ENSMUSG00000028023|ENSMUSG00000038256|ENSMUSG00000060969|ENSMUSG00000056770|ENSMUSG00000042426|ENSMUSG00000040407|…	http://amigo.geneontology.org/cgi-bin/amigo/term_details?term=GO:0009058
organic substance biosynthetic process	Gene Ontology	GO:1901576	410	4478	3.13154e-16	5.16054e-14	ENSMUSG00000026491|ENSMUSG00000049892|ENSMUSG00000021712|ENSMUSG00000003970|ENSMUSG00000031586|ENSMUSG00000028341|ENSMUSG00000030110|ENSMUSG00000045005|ENSMUSG00000030849|ENSMUSG00000004698|ENSMUSG00000019777|ENSMUSG00000015120|ENSMUSG00000074207|ENSMUSG00000059325|ENSMUSG00000024042|ENSMUSG00000028023|ENSMUSG00000038256|ENSMUSG00000060969|ENSMUSG00000056770|ENSMUSG00000042426|ENSMUSG00000040407|…	http://amigo.geneontology.org/cgi-bin/amigo/term_details?term=GO:1901576
cellular biosynthetic process	Gene Ontology	GO:0044249	403	4393	4.80991e-16	7.77959e-14	ENSMUSG00000026491|ENSMUSG00000049892|ENSMUSG00000021712|ENSMUSG00000003970|ENSMUSG00000031586|ENSMUSG00000028341|ENSMUSG00000030110|ENSMUSG00000045005|ENSMUSG00000030849|ENSMUSG00000004698|ENSMUSG00000019777|ENSMUSG00000015120|ENSMUSG00000074207|ENSMUSG00000059325|ENSMUSG00000024042|ENSMUSG00000028023|ENSMUSG00000038256|ENSMUSG00000060969|ENSMUSG00000056770|ENSMUSG00000042426|ENSMUSG00000040407|…	http://amigo.geneontology.org/cgi-bin/amigo/term_details?term=GO:0044249
single-organism developmental process	Gene Ontology	GO:0044767	434	4847	9.15169e-16	1.45329e-13	ENSMUSG00000053198|ENSMUSG00000029510|ENSMUSG00000026491|ENSMUSG00000059325|ENSMUSG00000028023|ENSMUSG00000059327|ENSMUSG00000028631|ENSMUSG00000028341|ENSMUSG00000030110|ENSMUSG00000041975|ENSMUSG00000037242|ENSMUSG00000040841|ENSMUSG00000030849|ENSMUSG00000028933|ENSMUSG00000023367|ENSMUSG00000032336|ENSMUSG00000004698|ENSMUSG00000019777|ENSMUSG00000015120|ENSMUSG00000063142|ENSMUSG00000027947|…	http://amigo.geneontology.org/cgi-bin/amigo/term_details?term=GO:0044767
developmental process	Gene Ontology	GO:0032502	437	4896	1.13278e-15	1.76673e-13	ENSMUSG00000053198|ENSMUSG00000029510|ENSMUSG00000026491|ENSMUSG00000059325|ENSMUSG00000028023|ENSMUSG00000059327|ENSMUSG00000028631|ENSMUSG00000028341|ENSMUSG00000030110|ENSMUSG00000041975|ENSMUSG00000037242|ENSMUSG00000040841|ENSMUSG00000030849|ENSMUSG00000028933|ENSMUSG00000023367|ENSMUSG00000032336|ENSMUSG00000004698|ENSMUSG00000019777|ENSMUSG00000015120|ENSMUSG00000063142|ENSMUSG00000027947|…	http://amigo.geneontology.org/cgi-bin/amigo/term_details?term=GO:0032502
positive regulation of metabolic process	Gene Ontology	GO:0009893	262	2538	2.11104e-15	3.23471e-13	ENSMUSG00000048583|ENSMUSG00000050395|ENSMUSG00000027540|ENSMUSG00000006575|ENSMUSG00000028023|ENSMUSG00000025856|ENSMUSG00000031586|ENSMUSG00000006333|ENSMUSG00000028341|ENSMUSG00000030110|ENSMUSG00000041974|ENSMUSG00000045005|ENSMUSG00000058301|ENSMUSG00000029203|ENSMUSG00000033335|ENSMUSG00000030849|ENSMUSG00000004814|ENSMUSG00000021134|ENSMUSG00000058886|ENSMUSG00000039959|ENSMUSG00000004054|…	http://amigo.geneontology.org/cgi-bin/amigo/term_details?term=GO:0009893
organic cyclic compound binding	Gene Ontology	GO:0097159	416	4620	2.19262e-15	3.30179e-13	ENSMUSG00000002017|ENSMUSG00000049892|ENSMUSG00000021712|ENSMUSG00000003970|ENSMUSG00000031586|ENSMUSG00000046027|ENSMUSG00000028341|ENSMUSG00000030110|ENSMUSG00000026491|ENSMUSG00000041272|ENSMUSG00000023286|ENSMUSG00000030849|ENSMUSG00000028933|ENSMUSG00000049940|ENSMUSG00000030847|ENSMUSG00000004054|ENSMUSG00000041375|ENSMUSG00000019777|ENSMUSG00000015120|ENSMUSG00000074207|ENSMUSG00000059325|…	http://amigo.geneontology.org/cgi-bin/amigo/term_details?term=GO:0097159
organic cyclic compound metabolic process	Gene Ontology	GO:1901360	407	4502	2.88292e-15	4.26769e-13	ENSMUSG00000053198|ENSMUSG00000026491|ENSMUSG00000049892|ENSMUSG00000028023|ENSMUSG00000058624|ENSMUSG00000031586|ENSMUSG00000028341|ENSMUSG00000030110|ENSMUSG00000041974|ENSMUSG00000045005|ENSMUSG00000030849|ENSMUSG00000028933|ENSMUSG00000000167|ENSMUSG00000004698|ENSMUSG00000019777|ENSMUSG00000015120|ENSMUSG00000063142|ENSMUSG00000059325|ENSMUSG00000024042|ENSMUSG00000030204|ENSMUSG00000060969|…	http://amigo.geneontology.org/cgi-bin/amigo/term_details?term=GO:1901360
nucleobase-containing compound metabolic process	Gene Ontology	GO:0006139	386	4210	2.96832e-15	4.32089e-13	ENSMUSG00000053198|ENSMUSG00000026491|ENSMUSG00000049892|ENSMUSG00000028023|ENSMUSG00000058624|ENSMUSG00000031586|ENSMUSG00000028341|ENSMUSG00000030110|ENSMUSG00000041974|ENSMUSG00000045005|ENSMUSG00000030849|ENSMUSG00000028933|ENSMUSG00000000167|ENSMUSG00000004698|ENSMUSG00000019777|ENSMUSG00000015120|ENSMUSG00000059325|ENSMUSG00000024042|ENSMUSG00000030204|ENSMUSG00000060969|ENSMUSG00000056770|…	http://amigo.geneontology.org/cgi-bin/amigo/term_details?term=GO:0006139
cellular macromolecule biosynthetic process	Gene Ontology	GO:0034645	342	3608	3.2044e-15	4.58807e-13	ENSMUSG00000026491|ENSMUSG00000049892|ENSMUSG00000021712|ENSMUSG00000003970|ENSMUSG00000031586|ENSMUSG00000028341|ENSMUSG00000030110|ENSMUSG00000045005|ENSMUSG00000030849|ENSMUSG00000004698|ENSMUSG00000019777|ENSMUSG00000015120|ENSMUSG00000059325|ENSMUSG00000024042|ENSMUSG00000028023|ENSMUSG00000038256|ENSMUSG00000060969|ENSMUSG00000056770|ENSMUSG00000042426|ENSMUSG00000026017|ENSMUSG00000036036|…	http://amigo.geneontology.org/cgi-bin/amigo/term_details?term=GO:0034645
macromolecule biosynthetic process	Gene Ontology	GO:0009059	349	3710	4.08641e-15	5.75657e-13	ENSMUSG00000026491|ENSMUSG00000049892|ENSMUSG00000021712|ENSMUSG00000003970|ENSMUSG00000031586|ENSMUSG00000028341|ENSMUSG00000030110|ENSMUSG00000045005|ENSMUSG00000030849|ENSMUSG00000004698|ENSMUSG00000019777|ENSMUSG00000015120|ENSMUSG00000059325|ENSMUSG00000024042|ENSMUSG00000014303|ENSMUSG00000038256|ENSMUSG00000060969|ENSMUSG00000056770|ENSMUSG00000042426|ENSMUSG00000026017|ENSMUSG00000036036|…	http://amigo.geneontology.org/cgi-bin/amigo/term_details?term=GO:0009059
positive regulation of macromolecule metabolic process	Gene Ontology	GO:0010604	246	2355	5.54835e-15	7.69196e-13	ENSMUSG00000048583|ENSMUSG00000050395|ENSMUSG00000027540|ENSMUSG00000023923|ENSMUSG00000028023|ENSMUSG00000025856|ENSMUSG00000031586|ENSMUSG00000006333|ENSMUSG00000028341|ENSMUSG00000030110|ENSMUSG00000041974|ENSMUSG00000045005|ENSMUSG00000058301|ENSMUSG00000029203|ENSMUSG00000030849|ENSMUSG00000004814|ENSMUSG00000021134|ENSMUSG00000058886|ENSMUSG00000039959|ENSMUSG00000004054|ENSMUSG00000020115|…	http://amigo.geneontology.org/cgi-bin/amigo/term_details?term=GO:0010604
cellular aromatic compound metabolic process	Gene Ontology	GO:0006725	395	4355	5.75004e-15	7.847e-13	ENSMUSG00000053198|ENSMUSG00000026491|ENSMUSG00000049892|ENSMUSG00000028023|ENSMUSG00000058624|ENSMUSG00000031586|ENSMUSG00000028341|ENSMUSG00000030110|ENSMUSG00000041974|ENSMUSG00000045005|ENSMUSG00000030849|ENSMUSG00000028933|ENSMUSG00000000167|ENSMUSG00000004698|ENSMUSG00000019777|ENSMUSG00000015120|ENSMUSG00000059325|ENSMUSG00000024042|ENSMUSG00000030204|ENSMUSG00000060969|ENSMUSG00000056770|…	http://amigo.geneontology.org/cgi-bin/amigo/term_details?term=GO:0006725
regulation of signal transduction	Gene Ontology	GO:0009966	227	2119	6.86345e-15	9.22237e-13	ENSMUSG00000048583|ENSMUSG00000024039|ENSMUSG00000050395|ENSMUSG00000027540|ENSMUSG00000031603|ENSMUSG00000025856|ENSMUSG00000031586|ENSMUSG00000020696|ENSMUSG00000030110|ENSMUSG00000045005|ENSMUSG00000029203|ENSMUSG00000033014|ENSMUSG00000031785|ENSMUSG00000030849|ENSMUSG00000004814|ENSMUSG00000004054|ENSMUSG00000017548|ENSMUSG00000025504|ENSMUSG00000030595|ENSMUSG00000040451|ENSMUSG00000015120|…	http://amigo.geneontology.org/cgi-bin/amigo/term_details?term=GO:0009966
negative regulation of cellular process	Gene Ontology	GO:0048523	339	3591	7.56623e-15	1.00126e-12	ENSMUSG00000033335|ENSMUSG00000020300|ENSMUSG00000017485|ENSMUSG00000027540|ENSMUSG00000035621|ENSMUSG00000045671|ENSMUSG00000004535|ENSMUSG00000049892|ENSMUSG00000032400|ENSMUSG00000025856|ENSMUSG00000029192|ENSMUSG00000020696|ENSMUSG00000036144|ENSMUSG00000028341|ENSMUSG00000057719|ENSMUSG00000071072|ENSMUSG00000029207|ENSMUSG00000019278|ENSMUSG00000037242|ENSMUSG00000058301|ENSMUSG00000024873|…	http://amigo.geneontology.org/cgi-bin/amigo/term_details?term=GO:0048523
regulation of cellular biosynthetic process	Gene Ontology	GO:0031326	307	3162	8.22093e-15	1.07167e-12	ENSMUSG00000048583|ENSMUSG00000020300|ENSMUSG00000026491|ENSMUSG00000021660|ENSMUSG00000006575|ENSMUSG00000004535|ENSMUSG00000049892|ENSMUSG00000030350|ENSMUSG00000025856|ENSMUSG00000037573|ENSMUSG00000031586|ENSMUSG00000036923|ENSMUSG00000024352|ENSMUSG00000036144|ENSMUSG00000028341|ENSMUSG00000030110|ENSMUSG00000029207|ENSMUSG00000020454|ENSMUSG00000045005|ENSMUSG00000058301|ENSMUSG00000033014|…	http://amigo.geneontology.org/cgi-bin/amigo/term_details?term=GO:0031326
heterocyclic compound binding	Gene Ontology	GO:1901363	408	4550	8.7437e-15	1.11174e-12	ENSMUSG00000002017|ENSMUSG00000049892|ENSMUSG00000021712|ENSMUSG00000003970|ENSMUSG00000031586|ENSMUSG00000028341|ENSMUSG00000030110|ENSMUSG00000026491|ENSMUSG00000041272|ENSMUSG00000023286|ENSMUSG00000030849|ENSMUSG00000028933|ENSMUSG00000049940|ENSMUSG00000030847|ENSMUSG00000004054|ENSMUSG00000041375|ENSMUSG00000019777|ENSMUSG00000015120|ENSMUSG00000074207|ENSMUSG00000059325|ENSMUSG00000024042|…	http://amigo.geneontology.org/cgi-bin/amigo/term_details?term=GO:1901363
heterocycle metabolic process	Gene Ontology	GO:0046483	390	4298	8.78291e-15	1.11174e-12	ENSMUSG00000053198|ENSMUSG00000026491|ENSMUSG00000049892|ENSMUSG00000028023|ENSMUSG00000058624|ENSMUSG00000031586|ENSMUSG00000028341|ENSMUSG00000030110|ENSMUSG00000041974|ENSMUSG00000045005|ENSMUSG00000030849|ENSMUSG00000028933|ENSMUSG00000000167|ENSMUSG00000004698|ENSMUSG00000019777|ENSMUSG00000015120|ENSMUSG00000059325|ENSMUSG00000024042|ENSMUSG00000030204|ENSMUSG00000060969|ENSMUSG00000056770|…	http://amigo.geneontology.org/cgi-bin/amigo/term_details?term=GO:0046483
phosphorus metabolic process	Gene Ontology	GO:0006793	250	2423	1.15172e-14	1.43702e-12	ENSMUSG00000048583|ENSMUSG00000003233|ENSMUSG00000024070|ENSMUSG00000050395|ENSMUSG00000027540|ENSMUSG00000006575|ENSMUSG00000031603|ENSMUSG00000036707|ENSMUSG00000025856|ENSMUSG00000030759|ENSMUSG00000031586|ENSMUSG00000001891|ENSMUSG00000016528|ENSMUSG00000057719|ENSMUSG00000029055|ENSMUSG00000003072|ENSMUSG00000029203|ENSMUSG00000025630|ENSMUSG00000030849|ENSMUSG00000004814|ENSMUSG00000004054|…	http://amigo.geneontology.org/cgi-bin/amigo/term_details?term=GO:0006793
regulation of biosynthetic process	Gene Ontology	GO:0009889	310	3219	1.55199e-14	1.90916e-12	ENSMUSG00000048583|ENSMUSG00000020300|ENSMUSG00000026491|ENSMUSG00000021660|ENSMUSG00000006575|ENSMUSG00000004535|ENSMUSG00000049892|ENSMUSG00000030350|ENSMUSG00000025856|ENSMUSG00000037573|ENSMUSG00000075701|ENSMUSG00000031586|ENSMUSG00000036923|ENSMUSG00000024352|ENSMUSG00000036144|ENSMUSG00000028341|ENSMUSG00000030110|ENSMUSG00000029207|ENSMUSG00000020454|ENSMUSG00000045005|ENSMUSG00000058301|…	http://amigo.geneontology.org/cgi-bin/amigo/term_details?term=GO:0009889
positive regulation of cellular metabolic process	Gene Ontology	GO:0031325	246	2381	1.72373e-14	2.09099e-12	ENSMUSG00000048583|ENSMUSG00000050395|ENSMUSG00000027540|ENSMUSG00000006575|ENSMUSG00000028023|ENSMUSG00000025856|ENSMUSG00000031586|ENSMUSG00000036923|ENSMUSG00000028341|ENSMUSG00000030110|ENSMUSG00000041974|ENSMUSG00000045005|ENSMUSG00000058301|ENSMUSG00000029203|ENSMUSG00000033335|ENSMUSG00000030849|ENSMUSG00000004814|ENSMUSG00000021134|ENSMUSG00000058886|ENSMUSG00000039959|ENSMUSG00000004054|…	http://amigo.geneontology.org/cgi-bin/amigo/term_details?term=GO:0031325
phosphate-containing compound metabolic process	Gene Ontology	GO:0006796	248	2419	2.91141e-14	3.48333e-12	ENSMUSG00000048583|ENSMUSG00000003233|ENSMUSG00000024070|ENSMUSG00000050395|ENSMUSG00000027540|ENSMUSG00000006575|ENSMUSG00000031603|ENSMUSG00000036707|ENSMUSG00000025856|ENSMUSG00000030759|ENSMUSG00000031586|ENSMUSG00000001891|ENSMUSG00000016528|ENSMUSG00000057719|ENSMUSG00000029055|ENSMUSG00000003072|ENSMUSG00000029203|ENSMUSG00000025630|ENSMUSG00000030849|ENSMUSG00000004814|ENSMUSG00000004054|…	http://amigo.geneontology.org/cgi-bin/amigo/term_details?term=GO:0006796
positive regulation of molecular function	Gene Ontology	GO:0044093	140	1102	3.14677e-14	3.71404e-12	ENSMUSG00000048583|ENSMUSG00000050395|ENSMUSG00000027540|ENSMUSG00000023923|ENSMUSG00000028023|ENSMUSG00000025856|ENSMUSG00000029192|ENSMUSG00000036923|ENSMUSG00000045005|ENSMUSG00000033335|ENSMUSG00000030849|ENSMUSG00000004814|ENSMUSG00000026414|ENSMUSG00000004054|ENSMUSG00000019777|ENSMUSG00000015120|ENSMUSG00000052539|ENSMUSG00000032356|ENSMUSG00000026812|ENSMUSG00000032826|ENSMUSG00000059146|…	http://amigo.geneontology.org/cgi-bin/amigo/term_details?term=GO:0044093
nucleic acid metabolic process	Gene Ontology	GO:0090304	347	3742	3.28e-14	3.81967e-12	ENSMUSG00000053198|ENSMUSG00000026491|ENSMUSG00000049892|ENSMUSG00000028023|ENSMUSG00000031586|ENSMUSG00000028341|ENSMUSG00000030110|ENSMUSG00000041974|ENSMUSG00000045005|ENSMUSG00000030849|ENSMUSG00000028933|ENSMUSG00000000167|ENSMUSG00000004698|ENSMUSG00000019777|ENSMUSG00000015120|ENSMUSG00000059325|ENSMUSG00000024042|ENSMUSG00000030204|ENSMUSG00000060969|ENSMUSG00000056770|ENSMUSG00000042426|…	http://amigo.geneontology.org/cgi-bin/amigo/term_details?term=GO:0090304
anatomical structure development	Gene Ontology	GO:0048856	407	4582	3.7946e-14	4.3608e-12	ENSMUSG00000053198|ENSMUSG00000029510|ENSMUSG00000026491|ENSMUSG00000059325|ENSMUSG00000028023|ENSMUSG00000059327|ENSMUSG00000010760|ENSMUSG00000028341|ENSMUSG00000030110|ENSMUSG00000041975|ENSMUSG00000037242|ENSMUSG00000040841|ENSMUSG00000030849|ENSMUSG00000028933|ENSMUSG00000023367|ENSMUSG00000032336|ENSMUSG00000004698|ENSMUSG00000019777|ENSMUSG00000015120|ENSMUSG00000063142|ENSMUSG00000027947|…	http://amigo.geneontology.org/cgi-bin/amigo/term_details?term=GO:0048856
macromolecule modification	Gene Ontology	GO:0043412	293	3020	4.48565e-14	5.08801e-12	ENSMUSG00000048583|ENSMUSG00000037808|ENSMUSG00000030217|ENSMUSG00000024070|ENSMUSG00000050395|ENSMUSG00000026637|ENSMUSG00000027540|ENSMUSG00000031603|ENSMUSG00000059325|ENSMUSG00000021712|ENSMUSG00000025856|ENSMUSG00000004383|ENSMUSG00000031586|ENSMUSG00000020696|ENSMUSG00000016528|ENSMUSG00000030110|ENSMUSG00000041975|ENSMUSG00000045005|ENSMUSG00000026235|ENSMUSG00000029203|ENSMUSG00000026074|…	http://amigo.geneontology.org/cgi-bin/amigo/term_details?term=GO:0043412
regulation of localization	Gene Ontology	GO:0032879	230	2199	4.58623e-14	5.1354e-12	ENSMUSG00000030216|ENSMUSG00000050395|ENSMUSG00000027540|ENSMUSG00000023923|ENSMUSG00000057123|ENSMUSG00000028023|ENSMUSG00000025856|ENSMUSG00000029192|ENSMUSG00000031586|ENSMUSG00000020696|ENSMUSG00000003184|ENSMUSG00000028341|ENSMUSG00000030110|ENSMUSG00000041974|ENSMUSG00000019278|ENSMUSG00000037242|ENSMUSG00000025484|ENSMUSG00000024873|ENSMUSG00000026074|ENSMUSG00000023286|ENSMUSG00000003484|…	http://amigo.geneontology.org/cgi-bin/amigo/term_details?term=GO:0032879
regulation of cellular macromolecule biosynthetic process	Gene Ontology	GO:2000112	286	2931	5.24458e-14	5.79824e-12	ENSMUSG00000048583|ENSMUSG00000020300|ENSMUSG00000026491|ENSMUSG00000021660|ENSMUSG00000004535|ENSMUSG00000049892|ENSMUSG00000030350|ENSMUSG00000025856|ENSMUSG00000037573|ENSMUSG00000031586|ENSMUSG00000036923|ENSMUSG00000024352|ENSMUSG00000036144|ENSMUSG00000028341|ENSMUSG00000030110|ENSMUSG00000029207|ENSMUSG00000020454|ENSMUSG00000045005|ENSMUSG00000058301|ENSMUSG00000033014|ENSMUSG00000026083|…	http://amigo.geneontology.org/cgi-bin/amigo/term_details?term=GO:2000112
regulation of molecular function	Gene Ontology	GO:0065009	206	1904	6.40106e-14	6.98835e-12	ENSMUSG00000048583|ENSMUSG00000024039|ENSMUSG00000050395|ENSMUSG00000027540|ENSMUSG00000023923|ENSMUSG00000004988|ENSMUSG00000059325|ENSMUSG00000028023|ENSMUSG00000025856|ENSMUSG00000029192|ENSMUSG00000020696|ENSMUSG00000057719|ENSMUSG00000019278|ENSMUSG00000045005|ENSMUSG00000024873|ENSMUSG00000033335|ENSMUSG00000030849|ENSMUSG00000004814|ENSMUSG00000022119|ENSMUSG00000026414|ENSMUSG00000033688|…	http://amigo.geneontology.org/cgi-bin/amigo/term_details?term=GO:0065009
regulation of intracellular signal transduction	Gene Ontology	GO:1902531	156	1299	6.62448e-14	7.14299e-12	ENSMUSG00000048583|ENSMUSG00000050395|ENSMUSG00000027540|ENSMUSG00000025856|ENSMUSG00000020696|ENSMUSG00000030110|ENSMUSG00000045005|ENSMUSG00000033335|ENSMUSG00000030849|ENSMUSG00000004814|ENSMUSG00000004054|ENSMUSG00000017548|ENSMUSG00000025504|ENSMUSG00000030595|ENSMUSG00000019777|ENSMUSG00000015120|ENSMUSG00000063632|ENSMUSG00000032356|ENSMUSG00000026812|ENSMUSG00000059146|ENSMUSG00000024039|…	http://amigo.geneontology.org/cgi-bin/amigo/term_details?term=GO:1902531
cellular component organization	Gene Ontology	GO:0016043	424	4849	8.4194e-14	8.96769e-12	ENSMUSG00000053198|ENSMUSG00000026491|ENSMUSG00000023923|ENSMUSG00000059325|ENSMUSG00000058624|ENSMUSG00000028341|ENSMUSG00000030110|ENSMUSG00000041975|ENSMUSG00000041974|ENSMUSG00000037242|ENSMUSG00000023286|ENSMUSG00000030849|ENSMUSG00000028933|ENSMUSG00000032336|ENSMUSG00000004698|ENSMUSG00000019777|ENSMUSG00000015120|ENSMUSG00000063142|ENSMUSG00000024049|ENSMUSG00000030161|ENSMUSG00000022353|…	http://amigo.geneontology.org/cgi-bin/amigo/term_details?term=GO:0016043
cell periphery	Gene Ontology	GO:0071944	352	3841	9.11662e-14	9.59332e-12	ENSMUSG00000053198|ENSMUSG00000029510|ENSMUSG00000023923|ENSMUSG00000092586|ENSMUSG00000049892|ENSMUSG00000059327|ENSMUSG00000050558|ENSMUSG00000030110|ENSMUSG00000037242|ENSMUSG00000030849|ENSMUSG00000030847|ENSMUSG00000032336|ENSMUSG00000031904|ENSMUSG00000063142|ENSMUSG00000027947|ENSMUSG00000059146|ENSMUSG00000031881|ENSMUSG00000044534|ENSMUSG00000027015|ENSMUSG00000040407|ENSMUSG00000003279|…	http://amigo.geneontology.org/cgi-bin/amigo/term_details?term=GO:0071944
regulation of RNA metabolic process	Gene Ontology	GO:0051252	269	2722	9.63563e-14	1.00188e-11	ENSMUSG00000048583|ENSMUSG00000053198|ENSMUSG00000026491|ENSMUSG00000021660|ENSMUSG00000054967|ENSMUSG00000049892|ENSMUSG00000030350|ENSMUSG00000038256|ENSMUSG00000037573|ENSMUSG00000031586|ENSMUSG00000036923|ENSMUSG00000024352|ENSMUSG00000036144|ENSMUSG00000028341|ENSMUSG00000030110|ENSMUSG00000029207|ENSMUSG00000045639|ENSMUSG00000045005|ENSMUSG00000058301|ENSMUSG00000033014|ENSMUSG00000030849|…	http://amigo.geneontology.org/cgi-bin/amigo/term_details?term=GO:0051252
regulation of macromolecule biosynthetic process	Gene Ontology	GO:0010556	291	3019	1.17343e-13	1.20574e-11	ENSMUSG00000048583|ENSMUSG00000020300|ENSMUSG00000026491|ENSMUSG00000021660|ENSMUSG00000004535|ENSMUSG00000049892|ENSMUSG00000030350|ENSMUSG00000025856|ENSMUSG00000037573|ENSMUSG00000075701|ENSMUSG00000031586|ENSMUSG00000036923|ENSMUSG00000024352|ENSMUSG00000036144|ENSMUSG00000028341|ENSMUSG00000030110|ENSMUSG00000029207|ENSMUSG00000020454|ENSMUSG00000045005|ENSMUSG00000058301|ENSMUSG00000033014|…	http://amigo.geneontology.org/cgi-bin/amigo/term_details?term=GO:0010556
multicellular organism development	Gene Ontology	GO:0007275	373	4147	1.45678e-13	1.47947e-11	ENSMUSG00000053198|ENSMUSG00000029510|ENSMUSG00000026491|ENSMUSG00000059325|ENSMUSG00000028023|ENSMUSG00000059327|ENSMUSG00000010760|ENSMUSG00000028341|ENSMUSG00000030110|ENSMUSG00000041975|ENSMUSG00000037242|ENSMUSG00000040841|ENSMUSG00000030849|ENSMUSG00000028933|ENSMUSG00000023367|ENSMUSG00000032336|ENSMUSG00000004698|ENSMUSG00000019777|ENSMUSG00000015120|ENSMUSG00000063142|ENSMUSG00000027947|…	http://amigo.geneontology.org/cgi-bin/amigo/term_details?term=GO:0007275
system development	Gene Ontology	GO:0048731	337	3652	1.64348e-13	1.6499e-11	ENSMUSG00000048583|ENSMUSG00000029510|ENSMUSG00000020937|ENSMUSG00000026491|ENSMUSG00000028402|ENSMUSG00000062252|ENSMUSG00000024440|ENSMUSG00000020647|ENSMUSG00000055003|ENSMUSG00000059325|ENSMUSG00000028023|ENSMUSG00000025856|ENSMUSG00000042211|ENSMUSG00000025289|ENSMUSG00000024922|ENSMUSG00000036144|ENSMUSG00000028341|ENSMUSG00000030110|ENSMUSG00000041975|ENSMUSG00000029207|ENSMUSG00000020454|…	http://amigo.geneontology.org/cgi-bin/amigo/term_details?term=GO:0048731
regulation of nucleic acid-templated transcription	Gene Ontology	GO:1903506	260	2620	1.82375e-13	1.81007e-11	ENSMUSG00000048583|ENSMUSG00000026491|ENSMUSG00000021660|ENSMUSG00000054967|ENSMUSG00000049892|ENSMUSG00000030350|ENSMUSG00000038256|ENSMUSG00000037573|ENSMUSG00000031586|ENSMUSG00000036923|ENSMUSG00000024352|ENSMUSG00000036144|ENSMUSG00000028341|ENSMUSG00000030110|ENSMUSG00000029207|ENSMUSG00000045639|ENSMUSG00000045005|ENSMUSG00000033014|ENSMUSG00000030849|ENSMUSG00000021134|ENSMUSG00000058886|…	http://amigo.geneontology.org/cgi-bin/amigo/term_details?term=GO:1903506
regulation of RNA biosynthetic process	Gene Ontology	GO:2001141	260	2626	2.30815e-13	2.2651e-11	ENSMUSG00000048583|ENSMUSG00000026491|ENSMUSG00000021660|ENSMUSG00000054967|ENSMUSG00000049892|ENSMUSG00000030350|ENSMUSG00000038256|ENSMUSG00000037573|ENSMUSG00000031586|ENSMUSG00000036923|ENSMUSG00000024352|ENSMUSG00000036144|ENSMUSG00000028341|ENSMUSG00000030110|ENSMUSG00000029207|ENSMUSG00000045639|ENSMUSG00000045005|ENSMUSG00000033014|ENSMUSG00000030849|ENSMUSG00000021134|ENSMUSG00000058886|…	http://amigo.geneontology.org/cgi-bin/amigo/term_details?term=GO:2001141
regulation of transcription, DNA-templated	Gene Ontology	GO:0006355	259	2617	2.71314e-13	2.63295e-11	ENSMUSG00000048583|ENSMUSG00000026491|ENSMUSG00000021660|ENSMUSG00000054967|ENSMUSG00000049892|ENSMUSG00000030350|ENSMUSG00000038256|ENSMUSG00000037573|ENSMUSG00000031586|ENSMUSG00000036923|ENSMUSG00000024352|ENSMUSG00000036144|ENSMUSG00000028341|ENSMUSG00000030110|ENSMUSG00000029207|ENSMUSG00000045639|ENSMUSG00000045005|ENSMUSG00000033014|ENSMUSG00000030849|ENSMUSG00000021134|ENSMUSG00000058886|…	http://amigo.geneontology.org/cgi-bin/amigo/term_details?term=GO:0006355
protein modification process	Gene Ontology	GO:0036211	274	2816	2.81575e-13	2.67312e-11	ENSMUSG00000048583|ENSMUSG00000037808|ENSMUSG00000019942|ENSMUSG00000024070|ENSMUSG00000050395|ENSMUSG00000026637|ENSMUSG00000027540|ENSMUSG00000031603|ENSMUSG00000059325|ENSMUSG00000021712|ENSMUSG00000025856|ENSMUSG00000004383|ENSMUSG00000031586|ENSMUSG00000020696|ENSMUSG00000030217|ENSMUSG00000030110|ENSMUSG00000041975|ENSMUSG00000045005|ENSMUSG00000026235|ENSMUSG00000029203|ENSMUSG00000026074|…	http://amigo.geneontology.org/cgi-bin/amigo/term_details?term=GO:0036211
cellular protein modification process	Gene Ontology	GO:0006464	274	2816	2.81575e-13	2.67312e-11	ENSMUSG00000048583|ENSMUSG00000037808|ENSMUSG00000019942|ENSMUSG00000024070|ENSMUSG00000050395|ENSMUSG00000026637|ENSMUSG00000027540|ENSMUSG00000031603|ENSMUSG00000059325|ENSMUSG00000021712|ENSMUSG00000025856|ENSMUSG00000004383|ENSMUSG00000031586|ENSMUSG00000020696|ENSMUSG00000030217|ENSMUSG00000030110|ENSMUSG00000041975|ENSMUSG00000045005|ENSMUSG00000026235|ENSMUSG00000029203|ENSMUSG00000026074|…	http://amigo.geneontology.org/cgi-bin/amigo/term_details?term=GO:0006464
cellular protein metabolic process	Gene Ontology	GO:0044267	335	3651	3.99177e-13	3.74883e-11	ENSMUSG00000048583|ENSMUSG00000037808|ENSMUSG00000019942|ENSMUSG00000024070|ENSMUSG00000050395|ENSMUSG00000026637|ENSMUSG00000027540|ENSMUSG00000031603|ENSMUSG00000059325|ENSMUSG00000021712|ENSMUSG00000031105|ENSMUSG00000043051|ENSMUSG00000004814|ENSMUSG00000031586|ENSMUSG00000020696|ENSMUSG00000021266|ENSMUSG00000021265|ENSMUSG00000030110|ENSMUSG00000041975|ENSMUSG00000019278|ENSMUSG00000045005|…	http://amigo.geneontology.org/cgi-bin/amigo/term_details?term=GO:0044267
cellular component organization or biogenesis	Gene Ontology	GO:0071840	430	4990	4.31466e-13	4.00896e-11	ENSMUSG00000053198|ENSMUSG00000026491|ENSMUSG00000023923|ENSMUSG00000059325|ENSMUSG00000058624|ENSMUSG00000028341|ENSMUSG00000030110|ENSMUSG00000041975|ENSMUSG00000041974|ENSMUSG00000037242|ENSMUSG00000023286|ENSMUSG00000030849|ENSMUSG00000028933|ENSMUSG00000032336|ENSMUSG00000004698|ENSMUSG00000019777|ENSMUSG00000015120|ENSMUSG00000063142|ENSMUSG00000024049|ENSMUSG00000030161|ENSMUSG00000022353|…	http://amigo.geneontology.org/cgi-bin/amigo/term_details?term=GO:0071840
RNA metabolic process	Gene Ontology	GO:0016070	312	3339	4.37942e-13	4.01928e-11	ENSMUSG00000048583|ENSMUSG00000053198|ENSMUSG00000030216|ENSMUSG00000026491|ENSMUSG00000047036|ENSMUSG00000055531|ENSMUSG00000021660|ENSMUSG00000004535|ENSMUSG00000049892|ENSMUSG00000030350|ENSMUSG00000038256|ENSMUSG00000037573|ENSMUSG00000031586|ENSMUSG00000036923|ENSMUSG00000024352|ENSMUSG00000036144|ENSMUSG00000028341|ENSMUSG00000030110|ENSMUSG00000029207|ENSMUSG00000045639|ENSMUSG00000045005|…	http://amigo.geneontology.org/cgi-bin/amigo/term_details?term=GO:0016070
nucleobase-containing compound biosynthetic process	Gene Ontology	GO:0034654	288	3015	4.4178e-13	4.01928e-11	ENSMUSG00000048583|ENSMUSG00000026491|ENSMUSG00000021660|ENSMUSG00000006575|ENSMUSG00000004535|ENSMUSG00000049892|ENSMUSG00000030350|ENSMUSG00000038256|ENSMUSG00000037573|ENSMUSG00000031586|ENSMUSG00000036923|ENSMUSG00000024352|ENSMUSG00000036144|ENSMUSG00000028341|ENSMUSG00000030110|ENSMUSG00000029207|ENSMUSG00000045639|ENSMUSG00000003072|ENSMUSG00000033014|ENSMUSG00000030849|ENSMUSG00000021134|…	http://amigo.geneontology.org/cgi-bin/amigo/term_details?term=GO:0034654
organelle part	Gene Ontology	GO:0044422	466	5517	5.24114e-13	4.71918e-11	ENSMUSG00000026491|ENSMUSG00000023923|ENSMUSG00000039756|ENSMUSG00000021712|ENSMUSG00000059327|ENSMUSG00000003970|ENSMUSG00000031586|ENSMUSG00000016528|ENSMUSG00000030110|ENSMUSG00000041974|ENSMUSG00000037242|ENSMUSG00000030849|ENSMUSG00000028933|ENSMUSG00000049940|ENSMUSG00000030847|ENSMUSG00000004054|ENSMUSG00000018672|ENSMUSG00000004698|ENSMUSG00000019777|ENSMUSG00000015120|ENSMUSG00000024049|…	http://amigo.geneontology.org/cgi-bin/amigo/term_details?term=GO:0044422
cellular nitrogen compound biosynthetic process	Gene Ontology	GO:0044271	328	3565	5.61213e-13	5.00167e-11	ENSMUSG00000048583|ENSMUSG00000020300|ENSMUSG00000026491|ENSMUSG00000021660|ENSMUSG00000006575|ENSMUSG00000004535|ENSMUSG00000049892|ENSMUSG00000030350|ENSMUSG00000031105|ENSMUSG00000037573|ENSMUSG00000031586|ENSMUSG00000036923|ENSMUSG00000024352|ENSMUSG00000036144|ENSMUSG00000028341|ENSMUSG00000030110|ENSMUSG00000029207|ENSMUSG00000020454|ENSMUSG00000003072|ENSMUSG00000058301|ENSMUSG00000033014|…	http://amigo.geneontology.org/cgi-bin/amigo/term_details?term=GO:0044271
intracellular organelle part	Gene Ontology	GO:0044446	455	5364	6.32089e-13	5.57643e-11	ENSMUSG00000026491|ENSMUSG00000023923|ENSMUSG00000039756|ENSMUSG00000021712|ENSMUSG00000059327|ENSMUSG00000003970|ENSMUSG00000031586|ENSMUSG00000016528|ENSMUSG00000030110|ENSMUSG00000041974|ENSMUSG00000037242|ENSMUSG00000030849|ENSMUSG00000028933|ENSMUSG00000049940|ENSMUSG00000004054|ENSMUSG00000018672|ENSMUSG00000004698|ENSMUSG00000019777|ENSMUSG00000015120|ENSMUSG00000024049|ENSMUSG00000030161|…	http://amigo.geneontology.org/cgi-bin/amigo/term_details?term=GO:0044446
organic cyclic compound biosynthetic process	Gene Ontology	GO:1901362	298	3165	7.61355e-13	6.64968e-11	ENSMUSG00000048583|ENSMUSG00000026491|ENSMUSG00000021660|ENSMUSG00000006575|ENSMUSG00000004535|ENSMUSG00000049892|ENSMUSG00000030350|ENSMUSG00000038256|ENSMUSG00000037573|ENSMUSG00000031586|ENSMUSG00000036923|ENSMUSG00000024352|ENSMUSG00000036144|ENSMUSG00000028341|ENSMUSG00000030110|ENSMUSG00000029207|ENSMUSG00000045639|ENSMUSG00000003072|ENSMUSG00000033014|ENSMUSG00000030849|ENSMUSG00000021134|…	http://amigo.geneontology.org/cgi-bin/amigo/term_details?term=GO:1901362
RNA biosynthetic process	Gene Ontology	GO:0032774	263	2697	7.73325e-13	6.67959e-11	ENSMUSG00000048583|ENSMUSG00000026491|ENSMUSG00000021660|ENSMUSG00000054967|ENSMUSG00000049892|ENSMUSG00000030350|ENSMUSG00000038256|ENSMUSG00000037573|ENSMUSG00000031586|ENSMUSG00000036923|ENSMUSG00000024352|ENSMUSG00000036144|ENSMUSG00000028341|ENSMUSG00000030110|ENSMUSG00000029207|ENSMUSG00000045639|ENSMUSG00000045005|ENSMUSG00000033014|ENSMUSG00000030849|ENSMUSG00000021134|ENSMUSG00000058886|…	http://amigo.geneontology.org/cgi-bin/amigo/term_details?term=GO:0032774
nucleic acid-templated transcription	Gene Ontology	GO:0097659	262	2684	7.80075e-13	6.67959e-11	ENSMUSG00000048583|ENSMUSG00000026491|ENSMUSG00000021660|ENSMUSG00000054967|ENSMUSG00000049892|ENSMUSG00000030350|ENSMUSG00000038256|ENSMUSG00000037573|ENSMUSG00000031586|ENSMUSG00000036923|ENSMUSG00000024352|ENSMUSG00000036144|ENSMUSG00000028341|ENSMUSG00000030110|ENSMUSG00000029207|ENSMUSG00000045639|ENSMUSG00000045005|ENSMUSG00000033014|ENSMUSG00000030849|ENSMUSG00000021134|ENSMUSG00000058886|…	http://amigo.geneontology.org/cgi-bin/amigo/term_details?term=GO:0097659
aromatic compound biosynthetic process	Gene Ontology	GO:0019438	291	3074	8.61684e-13	7.30675e-11	ENSMUSG00000048583|ENSMUSG00000026491|ENSMUSG00000021660|ENSMUSG00000006575|ENSMUSG00000004535|ENSMUSG00000049892|ENSMUSG00000030350|ENSMUSG00000038256|ENSMUSG00000037573|ENSMUSG00000031586|ENSMUSG00000036923|ENSMUSG00000024352|ENSMUSG00000036144|ENSMUSG00000028341|ENSMUSG00000030110|ENSMUSG00000029207|ENSMUSG00000045639|ENSMUSG00000003072|ENSMUSG00000033014|ENSMUSG00000030849|ENSMUSG00000021134|…	http://amigo.geneontology.org/cgi-bin/amigo/term_details?term=GO:0019438
heterocycle biosynthetic process	Gene Ontology	GO:0018130	290	3061	8.76297e-13	7.35921e-11	ENSMUSG00000048583|ENSMUSG00000026491|ENSMUSG00000021660|ENSMUSG00000006575|ENSMUSG00000004535|ENSMUSG00000049892|ENSMUSG00000030350|ENSMUSG00000038256|ENSMUSG00000037573|ENSMUSG00000031586|ENSMUSG00000036923|ENSMUSG00000024352|ENSMUSG00000036144|ENSMUSG00000028341|ENSMUSG00000030110|ENSMUSG00000029207|ENSMUSG00000045639|ENSMUSG00000003072|ENSMUSG00000033014|ENSMUSG00000030849|ENSMUSG00000021134|…	http://amigo.geneontology.org/cgi-bin/amigo/term_details?term=GO:0018130
cytoplasmic part	Gene Ontology	GO:0044444	490	5890	9.59507e-13	7.95535e-11	ENSMUSG00000029510|ENSMUSG00000023923|ENSMUSG00000049892|ENSMUSG00000021712|ENSMUSG00000059327|ENSMUSG00000003970|ENSMUSG00000031586|ENSMUSG00000030110|ENSMUSG00000037242|ENSMUSG00000023286|ENSMUSG00000026180|ENSMUSG00000030849|ENSMUSG00000030847|ENSMUSG00000018672|ENSMUSG00000038582|ENSMUSG00000063142|ENSMUSG00000024049|ENSMUSG00000030161|ENSMUSG00000074207|ENSMUSG00000024042|ENSMUSG00000031883|…	http://amigo.geneontology.org/cgi-bin/amigo/term_details?term=GO:0044444
plasma membrane	Gene Ontology	GO:0005886	340	3747	9.655e-13	7.95535e-11	ENSMUSG00000053198|ENSMUSG00000029510|ENSMUSG00000030217|ENSMUSG00000027523|ENSMUSG00000050395|ENSMUSG00000062252|ENSMUSG00000001687|ENSMUSG00000006575|ENSMUSG00000045671|ENSMUSG00000049892|ENSMUSG00000030350|ENSMUSG00000059327|ENSMUSG00000043051|ENSMUSG00000020696|ENSMUSG00000050558|ENSMUSG00000030110|ENSMUSG00000022565|ENSMUSG00000029055|ENSMUSG00000019278|ENSMUSG00000037242|ENSMUSG00000026235|…	http://amigo.geneontology.org/cgi-bin/amigo/term_details?term=GO:0005886
transcription, DNA-templated	Gene Ontology	GO:0006351	261	2681	1.14726e-12	9.36466e-11	ENSMUSG00000048583|ENSMUSG00000026491|ENSMUSG00000021660|ENSMUSG00000054967|ENSMUSG00000049892|ENSMUSG00000030350|ENSMUSG00000038256|ENSMUSG00000037573|ENSMUSG00000031586|ENSMUSG00000036923|ENSMUSG00000024352|ENSMUSG00000036144|ENSMUSG00000028341|ENSMUSG00000030110|ENSMUSG00000029207|ENSMUSG00000045639|ENSMUSG00000045005|ENSMUSG00000033014|ENSMUSG00000030849|ENSMUSG00000021134|ENSMUSG00000058886|…	http://amigo.geneontology.org/cgi-bin/amigo/term_details?term=GO:0006351
protein phosphorylation	Gene Ontology	GO:0006468	168	1500	1.43435e-12	1.15997e-10	ENSMUSG00000048583|ENSMUSG00000024070|ENSMUSG00000050395|ENSMUSG00000027540|ENSMUSG00000036707|ENSMUSG00000025856|ENSMUSG00000031586|ENSMUSG00000036923|ENSMUSG00000016528|ENSMUSG00000030110|ENSMUSG00000045005|ENSMUSG00000029203|ENSMUSG00000030849|ENSMUSG00000004814|ENSMUSG00000004054|ENSMUSG00000020385|ENSMUSG00000017548|ENSMUSG00000020115|ENSMUSG00000019777|ENSMUSG00000005583|ENSMUSG00000052539|…	http://amigo.geneontology.org/cgi-bin/amigo/term_details?term=GO:0006468
phosphorylation	Gene Ontology	GO:0016310	189	1770	2.3846e-12	1.91075e-10	ENSMUSG00000048583|ENSMUSG00000024070|ENSMUSG00000050395|ENSMUSG00000027540|ENSMUSG00000035621|ENSMUSG00000036707|ENSMUSG00000025856|ENSMUSG00000031586|ENSMUSG00000036923|ENSMUSG00000016528|ENSMUSG00000030110|ENSMUSG00000045005|ENSMUSG00000029203|ENSMUSG00000030849|ENSMUSG00000004814|ENSMUSG00000004054|ENSMUSG00000020385|ENSMUSG00000017548|ENSMUSG00000020115|ENSMUSG00000019777|ENSMUSG00000005583|…	http://amigo.geneontology.org/cgi-bin/amigo/term_details?term=GO:0016310
regulation of multicellular organismal process	Gene Ontology	GO:0051239	238	2398	2.43264e-12	1.93152e-10	ENSMUSG00000048583|ENSMUSG00000032171|ENSMUSG00000050395|ENSMUSG00000031603|ENSMUSG00000059325|ENSMUSG00000025856|ENSMUSG00000042211|ENSMUSG00000003184|ENSMUSG00000028341|ENSMUSG00000030110|ENSMUSG00000020454|ENSMUSG00000045005|ENSMUSG00000033335|ENSMUSG00000030849|ENSMUSG00000004814|ENSMUSG00000029669|ENSMUSG00000028933|ENSMUSG00000031302|ENSMUSG00000026414|ENSMUSG00000023367|ENSMUSG00000021266|…	http://amigo.geneontology.org/cgi-bin/amigo/term_details?term=GO:0051239
positive regulation of catalytic activity	Gene Ontology	GO:0043085	109	828	3.76741e-12	2.96437e-10	ENSMUSG00000048583|ENSMUSG00000050395|ENSMUSG00000027540|ENSMUSG00000023923|ENSMUSG00000025856|ENSMUSG00000029192|ENSMUSG00000036923|ENSMUSG00000045005|ENSMUSG00000033335|ENSMUSG00000030849|ENSMUSG00000039959|ENSMUSG00000004054|ENSMUSG00000004814|ENSMUSG00000015120|ENSMUSG00000052539|ENSMUSG00000032356|ENSMUSG00000026812|ENSMUSG00000059146|ENSMUSG00000033417|ENSMUSG00000005320|ENSMUSG00000005514|…	http://amigo.geneontology.org/cgi-bin/amigo/term_details?term=GO:0043085
regulation of protein metabolic process	Gene Ontology	GO:0051246	209	2075	2.05028e-11	1.59885e-09	ENSMUSG00000048583|ENSMUSG00000020300|ENSMUSG00000050395|ENSMUSG00000027540|ENSMUSG00000031603|ENSMUSG00000025856|ENSMUSG00000031586|ENSMUSG00000020696|ENSMUSG00000016528|ENSMUSG00000030110|ENSMUSG00000019278|ENSMUSG00000045005|ENSMUSG00000058301|ENSMUSG00000029203|ENSMUSG00000026074|ENSMUSG00000026083|ENSMUSG00000030849|ENSMUSG00000004814|ENSMUSG00000039959|ENSMUSG00000004054|ENSMUSG00000017548|…	http://amigo.geneontology.org/cgi-bin/amigo/term_details?term=GO:0051246
protein metabolic process	Gene Ontology	GO:0019538	360	4134	2.53619e-11	1.96028e-09	ENSMUSG00000059325|ENSMUSG00000021712|ENSMUSG00000003970|ENSMUSG00000031586|ENSMUSG00000016528|ENSMUSG00000030110|ENSMUSG00000041975|ENSMUSG00000045005|ENSMUSG00000023286|ENSMUSG00000030849|ENSMUSG00000004054|ENSMUSG00000038582|ENSMUSG00000004698|ENSMUSG00000019777|ENSMUSG00000015120|ENSMUSG00000027947|ENSMUSG00000028878|ENSMUSG00000024042|ENSMUSG00000059146|ENSMUSG00000052917|ENSMUSG00000056770|…	http://amigo.geneontology.org/cgi-bin/amigo/term_details?term=GO:0019538
animal organ development	Gene Ontology	GO:0048513	256	2701	2.65265e-11	2.0323e-09	ENSMUSG00000048583|ENSMUSG00000062252|ENSMUSG00000020937|ENSMUSG00000026491|ENSMUSG00000024440|ENSMUSG00000045098|ENSMUSG00000059325|ENSMUSG00000028023|ENSMUSG00000025856|ENSMUSG00000025289|ENSMUSG00000036144|ENSMUSG00000028341|ENSMUSG00000030110|ENSMUSG00000041975|ENSMUSG00000037242|ENSMUSG00000028631|ENSMUSG00000026180|ENSMUSG00000030849|ENSMUSG00000029669|ENSMUSG00000058886|ENSMUSG00000026414|…	http://amigo.geneontology.org/cgi-bin/amigo/term_details?term=GO:0048513
cell death	Gene Ontology	GO:0008219	178	1692	3.46836e-11	2.63415e-09	ENSMUSG00000020300|ENSMUSG00000050395|ENSMUSG00000027540|ENSMUSG00000020696|ENSMUSG00000036144|ENSMUSG00000028341|ENSMUSG00000029207|ENSMUSG00000019278|ENSMUSG00000037242|ENSMUSG00000029203|ENSMUSG00000030849|ENSMUSG00000028933|ENSMUSG00000039959|ENSMUSG00000030847|ENSMUSG00000004054|ENSMUSG00000026234|ENSMUSG00000019777|ENSMUSG00000024176|ENSMUSG00000005583|ENSMUSG00000063632|ENSMUSG00000021103|…	http://amigo.geneontology.org/cgi-bin/amigo/term_details?term=GO:0008219
regulation of cellular protein metabolic process	Gene Ontology	GO:0032268	195	1911	3.94662e-11	2.97153e-09	ENSMUSG00000048583|ENSMUSG00000020300|ENSMUSG00000050395|ENSMUSG00000027540|ENSMUSG00000031603|ENSMUSG00000025856|ENSMUSG00000031586|ENSMUSG00000020696|ENSMUSG00000030110|ENSMUSG00000019278|ENSMUSG00000045005|ENSMUSG00000058301|ENSMUSG00000029203|ENSMUSG00000026074|ENSMUSG00000030849|ENSMUSG00000004814|ENSMUSG00000039959|ENSMUSG00000004054|ENSMUSG00000017548|ENSMUSG00000019777|ENSMUSG00000015120|…	http://amigo.geneontology.org/cgi-bin/amigo/term_details?term=GO:0032268
regulation of phosphate metabolic process	Gene Ontology	GO:0019220	154	1401	4.85244e-11	3.62233e-09	ENSMUSG00000048583|ENSMUSG00000050395|ENSMUSG00000027540|ENSMUSG00000006575|ENSMUSG00000025856|ENSMUSG00000031586|ENSMUSG00000036923|ENSMUSG00000057719|ENSMUSG00000045005|ENSMUSG00000029203|ENSMUSG00000030849|ENSMUSG00000004814|ENSMUSG00000004054|ENSMUSG00000017548|ENSMUSG00000035621|ENSMUSG00000019777|ENSMUSG00000005583|ENSMUSG00000052539|ENSMUSG00000021103|ENSMUSG00000026812|ENSMUSG00000059146|…	http://amigo.geneontology.org/cgi-bin/amigo/term_details?term=GO:0019220
regulation of phosphorus metabolic process	Gene Ontology	GO:0051174	154	1402	5.08981e-11	3.76732e-09	ENSMUSG00000048583|ENSMUSG00000050395|ENSMUSG00000027540|ENSMUSG00000006575|ENSMUSG00000025856|ENSMUSG00000031586|ENSMUSG00000036923|ENSMUSG00000057719|ENSMUSG00000045005|ENSMUSG00000029203|ENSMUSG00000030849|ENSMUSG00000004814|ENSMUSG00000004054|ENSMUSG00000017548|ENSMUSG00000035621|ENSMUSG00000019777|ENSMUSG00000005583|ENSMUSG00000052539|ENSMUSG00000021103|ENSMUSG00000026812|ENSMUSG00000059146|…	http://amigo.geneontology.org/cgi-bin/amigo/term_details?term=GO:0051174
transport	Gene Ontology	GO:0006810	324	3666	7.71168e-11	5.65999e-09	ENSMUSG00000062252|ENSMUSG00000030216|ENSMUSG00000027884|ENSMUSG00000026491|ENSMUSG00000050395|ENSMUSG00000020027|ENSMUSG00000027540|ENSMUSG00000009035|ENSMUSG00000021025|ENSMUSG00000057123|ENSMUSG00000031105|ENSMUSG00000029192|ENSMUSG00000031586|ENSMUSG00000020696|ENSMUSG00000030452|ENSMUSG00000046027|ENSMUSG00000021265|ENSMUSG00000020454|ENSMUSG00000037242|ENSMUSG00000025484|ENSMUSG00000024873|…	http://amigo.geneontology.org/cgi-bin/amigo/term_details?term=GO:0006810
establishment of localization	Gene Ontology	GO:0051234	333	3794	8.16655e-11	5.94389e-09	ENSMUSG00000033022|ENSMUSG00000062252|ENSMUSG00000030216|ENSMUSG00000027884|ENSMUSG00000026491|ENSMUSG00000050395|ENSMUSG00000020027|ENSMUSG00000027540|ENSMUSG00000009035|ENSMUSG00000021025|ENSMUSG00000057123|ENSMUSG00000031105|ENSMUSG00000029192|ENSMUSG00000031586|ENSMUSG00000020696|ENSMUSG00000030452|ENSMUSG00000046027|ENSMUSG00000021265|ENSMUSG00000041974|ENSMUSG00000020454|ENSMUSG00000037242|…	http://amigo.geneontology.org/cgi-bin/amigo/term_details?term=GO:0051234
regulation of protein modification process	Gene Ontology	GO:0031399	151	1381	1.07983e-10	7.79439e-09	ENSMUSG00000048583|ENSMUSG00000050395|ENSMUSG00000027540|ENSMUSG00000031603|ENSMUSG00000025856|ENSMUSG00000031586|ENSMUSG00000036923|ENSMUSG00000030110|ENSMUSG00000045005|ENSMUSG00000029203|ENSMUSG00000030849|ENSMUSG00000004814|ENSMUSG00000004054|ENSMUSG00000017548|ENSMUSG00000019777|ENSMUSG00000015120|ENSMUSG00000052539|ENSMUSG00000021103|ENSMUSG00000026812|ENSMUSG00000059146|ENSMUSG00000033417|…	http://amigo.geneontology.org/cgi-bin/amigo/term_details?term=GO:0031399
enzyme binding	Gene Ontology	GO:0019899	174	1674	1.40873e-10	1.00851e-08	ENSMUSG00000027540|ENSMUSG00000023923|ENSMUSG00000004535|ENSMUSG00000029192|ENSMUSG00000020696|ENSMUSG00000028341|ENSMUSG00000057719|ENSMUSG00000029207|ENSMUSG00000045005|ENSMUSG00000029203|ENSMUSG00000023286|ENSMUSG00000033335|ENSMUSG00000000167|ENSMUSG00000020782|ENSMUSG00000066232|ENSMUSG00000004698|ENSMUSG00000019777|ENSMUSG00000015120|ENSMUSG00000020893|ENSMUSG00000032356|ENSMUSG00000030161|…	http://amigo.geneontology.org/cgi-bin/amigo/term_details?term=GO:0019899
regulation of phosphorylation	Gene Ontology	GO:0042325	136	1211	2.02331e-10	1.43672e-08	ENSMUSG00000048583|ENSMUSG00000050395|ENSMUSG00000027540|ENSMUSG00000025856|ENSMUSG00000031586|ENSMUSG00000036923|ENSMUSG00000030110|ENSMUSG00000045005|ENSMUSG00000029203|ENSMUSG00000030849|ENSMUSG00000004814|ENSMUSG00000004054|ENSMUSG00000017548|ENSMUSG00000035621|ENSMUSG00000019777|ENSMUSG00000052539|ENSMUSG00000021103|ENSMUSG00000026812|ENSMUSG00000059146|ENSMUSG00000024039|ENSMUSG00000033417|…	http://amigo.geneontology.org/cgi-bin/amigo/term_details?term=GO:0042325
anatomical structure morphogenesis	Gene Ontology	GO:0009653	223	2323	2.36113e-10	1.66307e-08	ENSMUSG00000048583|ENSMUSG00000062252|ENSMUSG00000055003|ENSMUSG00000059325|ENSMUSG00000028023|ENSMUSG00000025856|ENSMUSG00000036923|ENSMUSG00000036144|ENSMUSG00000028341|ENSMUSG00000030110|ENSMUSG00000029207|ENSMUSG00000037242|ENSMUSG00000028631|ENSMUSG00000031785|ENSMUSG00000030849|ENSMUSG00000029669|ENSMUSG00000028933|ENSMUSG00000026414|ENSMUSG00000021266|ENSMUSG00000029291|ENSMUSG00000019777|…	http://amigo.geneontology.org/cgi-bin/amigo/term_details?term=GO:0009653
nuclear part	Gene Ontology	GO:0044428	261	2835	2.49012e-10	1.73989e-08	ENSMUSG00000037808|ENSMUSG00000030216|ENSMUSG00000026491|ENSMUSG00000024070|ENSMUSG00000055531|ENSMUSG00000057469|ENSMUSG00000035621|ENSMUSG00000020263|ENSMUSG00000039756|ENSMUSG00000003970|ENSMUSG00000031586|ENSMUSG00000016528|ENSMUSG00000057719|ENSMUSG00000041974|ENSMUSG00000017485|ENSMUSG00000037242|ENSMUSG00000058301|ENSMUSG00000033014|ENSMUSG00000030849|ENSMUSG00000049313|ENSMUSG00000028933|…	http://amigo.geneontology.org/cgi-bin/amigo/term_details?term=GO:0044428
regulation of protein phosphorylation	Gene Ontology	GO:0001932	127	1118	4.40766e-10	3.05528e-08	ENSMUSG00000048583|ENSMUSG00000050395|ENSMUSG00000027540|ENSMUSG00000025856|ENSMUSG00000031586|ENSMUSG00000036923|ENSMUSG00000030110|ENSMUSG00000045005|ENSMUSG00000029203|ENSMUSG00000030849|ENSMUSG00000004814|ENSMUSG00000004054|ENSMUSG00000017548|ENSMUSG00000019777|ENSMUSG00000052539|ENSMUSG00000021103|ENSMUSG00000026812|ENSMUSG00000059146|ENSMUSG00000033417|ENSMUSG00000005320|ENSMUSG00000022791|…	http://amigo.geneontology.org/cgi-bin/amigo/term_details?term=GO:0001932
response to stress	Gene Ontology	GO:0006950	250	2705	4.66461e-10	3.20793e-08	ENSMUSG00000048583|ENSMUSG00000019942|ENSMUSG00000027540|ENSMUSG00000023923|ENSMUSG00000031548|ENSMUSG00000059325|ENSMUSG00000030219|ENSMUSG00000025856|ENSMUSG00000004383|ENSMUSG00000075701|ENSMUSG00000031586|ENSMUSG00000020300|ENSMUSG00000028341|ENSMUSG00000030110|ENSMUSG00000041974|ENSMUSG00000045005|ENSMUSG00000058301|ENSMUSG00000029203|ENSMUSG00000026074|ENSMUSG00000023286|ENSMUSG00000026180|…	http://amigo.geneontology.org/cgi-bin/amigo/term_details?term=GO:0006950
DNA binding	Gene Ontology	GO:0003677	175	1722	6.07504e-10	4.14527e-08	ENSMUSG00000026491|ENSMUSG00000059325|ENSMUSG00000028023|ENSMUSG00000036144|ENSMUSG00000028341|ENSMUSG00000021264|ENSMUSG00000045639|ENSMUSG00000058301|ENSMUSG00000033014|ENSMUSG00000041272|ENSMUSG00000028933|ENSMUSG00000001065|ENSMUSG00000017548|ENSMUSG00000058886|ENSMUSG00000026234|ENSMUSG00000019777|ENSMUSG00000024176|ENSMUSG00000005583|ENSMUSG00000063632|ENSMUSG00000032498|ENSMUSG00000037492|…	http://amigo.geneontology.org/cgi-bin/amigo/term_details?term=GO:0003677
cell surface receptor signaling pathway	Gene Ontology	GO:0007166	189	1904	6.44348e-10	4.36259e-08	ENSMUSG00000048583|ENSMUSG00000029510|ENSMUSG00000020300|ENSMUSG00000027540|ENSMUSG00000030351|ENSMUSG00000028023|ENSMUSG00000025856|ENSMUSG00000031586|ENSMUSG00000020696|ENSMUSG00000050558|ENSMUSG00000028341|ENSMUSG00000030110|ENSMUSG00000045005|ENSMUSG00000029203|ENSMUSG00000033014|ENSMUSG00000033335|ENSMUSG00000030849|ENSMUSG00000004814|ENSMUSG00000029669|ENSMUSG00000030847|ENSMUSG00000025006|…	http://amigo.geneontology.org/cgi-bin/amigo/term_details?term=GO:0007166
positive regulation of protein metabolic process	Gene Ontology	GO:0051247	136	1237	7.16818e-10	4.81592e-08	ENSMUSG00000048583|ENSMUSG00000050395|ENSMUSG00000027540|ENSMUSG00000025856|ENSMUSG00000031586|ENSMUSG00000036923|ENSMUSG00000016528|ENSMUSG00000030110|ENSMUSG00000045005|ENSMUSG00000026235|ENSMUSG00000029203|ENSMUSG00000030849|ENSMUSG00000004814|ENSMUSG00000039959|ENSMUSG00000004054|ENSMUSG00000020115|ENSMUSG00000019777|ENSMUSG00000015120|ENSMUSG00000052539|ENSMUSG00000027947|ENSMUSG00000059146|…	http://amigo.geneontology.org/cgi-bin/amigo/term_details?term=GO:0051247
single-organism metabolic process	Gene Ontology	GO:0044710	280	3135	8.50766e-10	5.6722e-08	ENSMUSG00000048583|ENSMUSG00000030217|ENSMUSG00000027540|ENSMUSG00000006575|ENSMUSG00000045671|ENSMUSG00000063428|ENSMUSG00000021712|ENSMUSG00000025856|ENSMUSG00000058624|ENSMUSG00000030759|ENSMUSG00000021266|ENSMUSG00000028341|ENSMUSG00000030110|ENSMUSG00000071072|ENSMUSG00000029055|ENSMUSG00000019278|ENSMUSG00000003072|ENSMUSG00000058301|ENSMUSG00000023286|ENSMUSG00000003484|ENSMUSG00000030849|…	http://amigo.geneontology.org/cgi-bin/amigo/term_details?term=GO:0044710
apoptotic process	Gene Ontology	GO:0006915	160	1546	1.12527e-09	7.44553e-08	ENSMUSG00000020300|ENSMUSG00000050395|ENSMUSG00000027540|ENSMUSG00000020696|ENSMUSG00000028341|ENSMUSG00000029207|ENSMUSG00000019278|ENSMUSG00000037242|ENSMUSG00000029203|ENSMUSG00000030849|ENSMUSG00000028933|ENSMUSG00000039959|ENSMUSG00000030847|ENSMUSG00000004054|ENSMUSG00000026234|ENSMUSG00000019777|ENSMUSG00000024176|ENSMUSG00000005583|ENSMUSG00000021103|ENSMUSG00000063142|ENSMUSG00000029524|…	http://amigo.geneontology.org/cgi-bin/amigo/term_details?term=GO:0006915
programmed cell death	Gene Ontology	GO:0012501	162	1574	1.25619e-09	8.24931e-08	ENSMUSG00000020300|ENSMUSG00000050395|ENSMUSG00000027540|ENSMUSG00000020696|ENSMUSG00000028341|ENSMUSG00000029207|ENSMUSG00000019278|ENSMUSG00000037242|ENSMUSG00000029203|ENSMUSG00000030849|ENSMUSG00000028933|ENSMUSG00000039959|ENSMUSG00000030847|ENSMUSG00000004054|ENSMUSG00000026234|ENSMUSG00000019777|ENSMUSG00000024176|ENSMUSG00000005583|ENSMUSG00000021103|ENSMUSG00000063142|ENSMUSG00000029524|…	http://amigo.geneontology.org/cgi-bin/amigo/term_details?term=GO:0012501
response to chemical	Gene Ontology	GO:0042221	248	2710	1.31143e-09	8.54776e-08	ENSMUSG00000048583|ENSMUSG00000020300|ENSMUSG00000027540|ENSMUSG00000032688|ENSMUSG00000025856|ENSMUSG00000075701|ENSMUSG00000020696|ENSMUSG00000028341|ENSMUSG00000030110|ENSMUSG00000022565|ENSMUSG00000041974|ENSMUSG00000029207|ENSMUSG00000019278|ENSMUSG00000037242|ENSMUSG00000058301|ENSMUSG00000029203|ENSMUSG00000033014|ENSMUSG00000023286|ENSMUSG00000033335|ENSMUSG00000030849|ENSMUSG00000004814|…	http://amigo.geneontology.org/cgi-bin/amigo/term_details?term=GO:0042221
positive regulation of cellular protein metabolic process	Gene Ontology	GO:0032270	128	1155	1.51388e-09	9.79421e-08	ENSMUSG00000048583|ENSMUSG00000050395|ENSMUSG00000027540|ENSMUSG00000025856|ENSMUSG00000031586|ENSMUSG00000036923|ENSMUSG00000030110|ENSMUSG00000045005|ENSMUSG00000029203|ENSMUSG00000030849|ENSMUSG00000004814|ENSMUSG00000039959|ENSMUSG00000004054|ENSMUSG00000019777|ENSMUSG00000015120|ENSMUSG00000052539|ENSMUSG00000027947|ENSMUSG00000059146|ENSMUSG00000033417|ENSMUSG00000005320|ENSMUSG00000022791|…	http://amigo.geneontology.org/cgi-bin/amigo/term_details?term=GO:0032270
positive regulation of response to stimulus	Gene Ontology	GO:0048584	158	1530	1.66199e-09	1.06734e-07	ENSMUSG00000048583|ENSMUSG00000050395|ENSMUSG00000027540|ENSMUSG00000059325|ENSMUSG00000025856|ENSMUSG00000031586|ENSMUSG00000036923|ENSMUSG00000028341|ENSMUSG00000041974|ENSMUSG00000045005|ENSMUSG00000029203|ENSMUSG00000026180|ENSMUSG00000030849|ENSMUSG00000004814|ENSMUSG00000004054|ENSMUSG00000020115|ENSMUSG00000019777|ENSMUSG00000015120|ENSMUSG00000063632|ENSMUSG00000032356|ENSMUSG00000027947|…	http://amigo.geneontology.org/cgi-bin/amigo/term_details?term=GO:0048584
regulation of catalytic activity	Gene Ontology	GO:0050790	150	1436	2.23412e-09	1.42429e-07	ENSMUSG00000048583|ENSMUSG00000050395|ENSMUSG00000027540|ENSMUSG00000023923|ENSMUSG00000025856|ENSMUSG00000029192|ENSMUSG00000020696|ENSMUSG00000057719|ENSMUSG00000019278|ENSMUSG00000045005|ENSMUSG00000033335|ENSMUSG00000030849|ENSMUSG00000022119|ENSMUSG00000026414|ENSMUSG00000033688|ENSMUSG00000004054|ENSMUSG00000004952|ENSMUSG00000035621|ENSMUSG00000004814|ENSMUSG00000015120|ENSMUSG00000052539|…	http://amigo.geneontology.org/cgi-bin/amigo/term_details?term=GO:0050790
nucleic acid binding	Gene Ontology	GO:0003676	263	2936	2.47279e-09	1.56503e-07	ENSMUSG00000030216|ENSMUSG00000020300|ENSMUSG00000002017|ENSMUSG00000055531|ENSMUSG00000021660|ENSMUSG00000027540|ENSMUSG00000059325|ENSMUSG00000028023|ENSMUSG00000003970|ENSMUSG00000031586|ENSMUSG00000036923|ENSMUSG00000036144|ENSMUSG00000028341|ENSMUSG00000021264|ENSMUSG00000022565|ENSMUSG00000026491|ENSMUSG00000020454|ENSMUSG00000022433|ENSMUSG00000058301|ENSMUSG00000033014|ENSMUSG00000041272|…	http://amigo.geneontology.org/cgi-bin/amigo/term_details?term=GO:0003676
response to organic substance	Gene Ontology	GO:0010033	193	1994	2.62033e-09	1.64647e-07	ENSMUSG00000048583|ENSMUSG00000020300|ENSMUSG00000027540|ENSMUSG00000020696|ENSMUSG00000028341|ENSMUSG00000030110|ENSMUSG00000041974|ENSMUSG00000045005|ENSMUSG00000058301|ENSMUSG00000029203|ENSMUSG00000033014|ENSMUSG00000023286|ENSMUSG00000033335|ENSMUSG00000030849|ENSMUSG00000004814|ENSMUSG00000021134|ENSMUSG00000036449|ENSMUSG00000030595|ENSMUSG00000004698|ENSMUSG00000019777|ENSMUSG00000015120|…	http://amigo.geneontology.org/cgi-bin/amigo/term_details?term=GO:0010033
regulation of biological quality	Gene Ontology	GO:0065008	256	2849	3.27232e-09	2.04146e-07	ENSMUSG00000048583|ENSMUSG00000029465|ENSMUSG00000035621|ENSMUSG00000063428|ENSMUSG00000025856|ENSMUSG00000043051|ENSMUSG00000075701|ENSMUSG00000006333|ENSMUSG00000028341|ENSMUSG00000030110|ENSMUSG00000029207|ENSMUSG00000037242|ENSMUSG00000058301|ENSMUSG00000029203|ENSMUSG00000005686|ENSMUSG00000003484|ENSMUSG00000049313|ENSMUSG00000020647|ENSMUSG00000026414|ENSMUSG00000030847|ENSMUSG00000024270|…	http://amigo.geneontology.org/cgi-bin/amigo/term_details?term=GO:0065008
regulation of developmental process	Gene Ontology	GO:0050793	200	2101	4.37641e-09	2.71089e-07	ENSMUSG00000048583|ENSMUSG00000055003|ENSMUSG00000059325|ENSMUSG00000025856|ENSMUSG00000042211|ENSMUSG00000036923|ENSMUSG00000036144|ENSMUSG00000030110|ENSMUSG00000020454|ENSMUSG00000033335|ENSMUSG00000030849|ENSMUSG00000004814|ENSMUSG00000029669|ENSMUSG00000028933|ENSMUSG00000031302|ENSMUSG00000023367|ENSMUSG00000021266|ENSMUSG00000017548|ENSMUSG00000029291|ENSMUSG00000019777|ENSMUSG00000024176|…	http://amigo.geneontology.org/cgi-bin/amigo/term_details?term=GO:0050793
regulation of transcription from RNA polymerase II promoter	Gene Ontology	GO:0006357	156	1529	4.53259e-09	2.78786e-07	ENSMUSG00000048583|ENSMUSG00000059325|ENSMUSG00000028023|ENSMUSG00000038256|ENSMUSG00000036923|ENSMUSG00000036144|ENSMUSG00000028341|ENSMUSG00000021264|ENSMUSG00000045005|ENSMUSG00000033014|ENSMUSG00000030849|ENSMUSG00000036036|ENSMUSG00000017548|ENSMUSG00000020115|ENSMUSG00000019777|ENSMUSG00000024176|ENSMUSG00000015120|ENSMUSG00000063632|ENSMUSG00000021103|ENSMUSG00000024042|ENSMUSG00000014303|…	http://amigo.geneontology.org/cgi-bin/amigo/term_details?term=GO:0006357
ion binding	Gene Ontology	GO:0043167	289	3323	5.1875e-09	3.16836e-07	ENSMUSG00000024070|ENSMUSG00000027540|ENSMUSG00000032010|ENSMUSG00000054967|ENSMUSG00000030218|ENSMUSG00000021712|ENSMUSG00000058624|ENSMUSG00000020696|ENSMUSG00000046027|ENSMUSG00000028341|ENSMUSG00000057719|ENSMUSG00000029055|ENSMUSG00000019278|ENSMUSG00000058301|ENSMUSG00000049858|ENSMUSG00000033014|ENSMUSG00000026083|ENSMUSG00000003484|ENSMUSG00000004383|ENSMUSG00000058886|ENSMUSG00000036036|…	http://amigo.geneontology.org/cgi-bin/amigo/term_details?term=GO:0043167
positive regulation of nucleobase-containing compound metabolic process	Gene Ontology	GO:0045935	147	1421	5.85623e-09	3.55197e-07	ENSMUSG00000048583|ENSMUSG00000006575|ENSMUSG00000028023|ENSMUSG00000038256|ENSMUSG00000028341|ENSMUSG00000030110|ENSMUSG00000041974|ENSMUSG00000045005|ENSMUSG00000058301|ENSMUSG00000030849|ENSMUSG00000021134|ENSMUSG00000058886|ENSMUSG00000020115|ENSMUSG00000019777|ENSMUSG00000024176|ENSMUSG00000005583|ENSMUSG00000063632|ENSMUSG00000021103|ENSMUSG00000014303|ENSMUSG00000030470|ENSMUSG00000025856|…	http://amigo.geneontology.org/cgi-bin/amigo/term_details?term=GO:0045935
cell proliferation	Gene Ontology	GO:0008283	163	1629	6.81677e-09	4.10605e-07	ENSMUSG00000048583|ENSMUSG00000020937|ENSMUSG00000020263|ENSMUSG00000028023|ENSMUSG00000025856|ENSMUSG00000034165|ENSMUSG00000028341|ENSMUSG00000045005|ENSMUSG00000040841|ENSMUSG00000030849|ENSMUSG00000004814|ENSMUSG00000004054|ENSMUSG00000017548|ENSMUSG00000020115|ENSMUSG00000019777|ENSMUSG00000024176|ENSMUSG00000005583|ENSMUSG00000063632|ENSMUSG00000065954|ENSMUSG00000060038|ENSMUSG00000026812|…	http://amigo.geneontology.org/cgi-bin/amigo/term_details?term=GO:0008283
organelle organization	Gene Ontology	GO:0006996	262	2957	6.90341e-09	4.12975e-07	ENSMUSG00000048583|ENSMUSG00000030216|ENSMUSG00000026491|ENSMUSG00000027540|ENSMUSG00000023923|ENSMUSG00000059325|ENSMUSG00000030350|ENSMUSG00000025856|ENSMUSG00000029192|ENSMUSG00000036923|ENSMUSG00000021264|ENSMUSG00000041975|ENSMUSG00000017485|ENSMUSG00000045005|ENSMUSG00000058301|ENSMUSG00000030649|ENSMUSG00000023286|ENSMUSG00000033335|ENSMUSG00000030849|ENSMUSG00000004814|ENSMUSG00000032782|…	http://amigo.geneontology.org/cgi-bin/amigo/term_details?term=GO:0006996
tissue development	Gene Ontology	GO:0009888	156	1541	7.33678e-09	4.35914e-07	ENSMUSG00000062252|ENSMUSG00000059325|ENSMUSG00000028023|ENSMUSG00000025856|ENSMUSG00000036144|ENSMUSG00000028341|ENSMUSG00000030110|ENSMUSG00000041975|ENSMUSG00000037242|ENSMUSG00000030849|ENSMUSG00000036334|ENSMUSG00000028933|ENSMUSG00000026414|ENSMUSG00000039457|ENSMUSG00000004698|ENSMUSG00000019777|ENSMUSG00000024176|ENSMUSG00000005583|ENSMUSG00000063632|ENSMUSG00000063142|ENSMUSG00000026812|…	http://amigo.geneontology.org/cgi-bin/amigo/term_details?term=GO:0009888
non-membrane-bounded organelle	Gene Ontology	GO:0043228	284	3266	7.44228e-09	4.36247e-07	ENSMUSG00000021458|ENSMUSG00000020300|ENSMUSG00000026491|ENSMUSG00000017485|ENSMUSG00000045733|ENSMUSG00000039756|ENSMUSG00000032400|ENSMUSG00000003970|ENSMUSG00000075701|ENSMUSG00000031586|ENSMUSG00000036923|ENSMUSG00000030249|ENSMUSG00000016528|ENSMUSG00000021264|ENSMUSG00000071072|ENSMUSG00000041974|ENSMUSG00000020454|ENSMUSG00000037242|ENSMUSG00000058301|ENSMUSG00000024873|ENSMUSG00000026234|…	http://amigo.geneontology.org/cgi-bin/amigo/term_details?term=GO:0043228
intracellular non-membrane-bounded organelle	Gene Ontology	GO:0043232	284	3266	7.44228e-09	4.36247e-07	ENSMUSG00000021458|ENSMUSG00000020300|ENSMUSG00000026491|ENSMUSG00000017485|ENSMUSG00000045733|ENSMUSG00000039756|ENSMUSG00000032400|ENSMUSG00000003970|ENSMUSG00000075701|ENSMUSG00000031586|ENSMUSG00000036923|ENSMUSG00000030249|ENSMUSG00000016528|ENSMUSG00000021264|ENSMUSG00000071072|ENSMUSG00000041974|ENSMUSG00000020454|ENSMUSG00000037242|ENSMUSG00000058301|ENSMUSG00000024873|ENSMUSG00000026234|…	http://amigo.geneontology.org/cgi-bin/amigo/term_details?term=GO:0043232
nuclear lumen	Gene Ontology	GO:0031981	223	2435	1.00889e-08	5.87442e-07	ENSMUSG00000030216|ENSMUSG00000026491|ENSMUSG00000024070|ENSMUSG00000055531|ENSMUSG00000020263|ENSMUSG00000039756|ENSMUSG00000003970|ENSMUSG00000031586|ENSMUSG00000016528|ENSMUSG00000057719|ENSMUSG00000041974|ENSMUSG00000017485|ENSMUSG00000037242|ENSMUSG00000058301|ENSMUSG00000033014|ENSMUSG00000030849|ENSMUSG00000004591|ENSMUSG00000042306|ENSMUSG00000054405|ENSMUSG00000066232|ENSMUSG00000004698|…	http://amigo.geneontology.org/cgi-bin/amigo/term_details?term=GO:0031981
regulation of cellular component organization	Gene Ontology	GO:0051128	193	2036	1.14381e-08	6.61592e-07	ENSMUSG00000048583|ENSMUSG00000030216|ENSMUSG00000027540|ENSMUSG00000023923|ENSMUSG00000055003|ENSMUSG00000058624|ENSMUSG00000042211|ENSMUSG00000036923|ENSMUSG00000030110|ENSMUSG00000041974|ENSMUSG00000029207|ENSMUSG00000045005|ENSMUSG00000058301|ENSMUSG00000023286|ENSMUSG00000033335|ENSMUSG00000030849|ENSMUSG00000004814|ENSMUSG00000039959|ENSMUSG00000028998|ENSMUSG00000025504|ENSMUSG00000029291|…	http://amigo.geneontology.org/cgi-bin/amigo/term_details?term=GO:0051128
positive regulation of cell communication	Gene Ontology	GO:0010647	134	1275	1.23089e-08	7.07275e-07	ENSMUSG00000048583|ENSMUSG00000050395|ENSMUSG00000027540|ENSMUSG00000025856|ENSMUSG00000031586|ENSMUSG00000045005|ENSMUSG00000029203|ENSMUSG00000030849|ENSMUSG00000004814|ENSMUSG00000004054|ENSMUSG00000019777|ENSMUSG00000015120|ENSMUSG00000063632|ENSMUSG00000049044|ENSMUSG00000027947|ENSMUSG00000059146|ENSMUSG00000031883|ENSMUSG00000031075|ENSMUSG00000029335|ENSMUSG00000030471|ENSMUSG00000025326|…	http://amigo.geneontology.org/cgi-bin/amigo/term_details?term=GO:0010647
transcription from RNA polymerase II promoter	Gene Ontology	GO:0006366	158	1581	1.28571e-08	7.33948e-07	ENSMUSG00000048583|ENSMUSG00000059325|ENSMUSG00000028023|ENSMUSG00000038256|ENSMUSG00000036923|ENSMUSG00000036144|ENSMUSG00000028341|ENSMUSG00000021264|ENSMUSG00000045005|ENSMUSG00000033014|ENSMUSG00000030849|ENSMUSG00000036036|ENSMUSG00000017548|ENSMUSG00000020115|ENSMUSG00000019777|ENSMUSG00000024176|ENSMUSG00000015120|ENSMUSG00000063632|ENSMUSG00000021103|ENSMUSG00000024042|ENSMUSG00000014303|…	http://amigo.geneontology.org/cgi-bin/amigo/term_details?term=GO:0006366
metal ion binding	Gene Ontology	GO:0046872	273	3133	1.32529e-08	7.51628e-07	ENSMUSG00000024070|ENSMUSG00000027540|ENSMUSG00000032010|ENSMUSG00000054967|ENSMUSG00000030218|ENSMUSG00000021712|ENSMUSG00000058624|ENSMUSG00000020696|ENSMUSG00000028341|ENSMUSG00000057719|ENSMUSG00000029055|ENSMUSG00000019278|ENSMUSG00000058301|ENSMUSG00000049858|ENSMUSG00000033014|ENSMUSG00000026083|ENSMUSG00000003484|ENSMUSG00000058886|ENSMUSG00000036036|ENSMUSG00000001065|ENSMUSG00000017548|…	http://amigo.geneontology.org/cgi-bin/amigo/term_details?term=GO:0046872
response to oxygen-containing compound	Gene Ontology	GO:1901700	114	1030	1.33619e-08	7.52924e-07	ENSMUSG00000048583|ENSMUSG00000020300|ENSMUSG00000027540|ENSMUSG00000034165|ENSMUSG00000016528|ENSMUSG00000030110|ENSMUSG00000041974|ENSMUSG00000030562|ENSMUSG00000058301|ENSMUSG00000033335|ENSMUSG00000030595|ENSMUSG00000004698|ENSMUSG00000019777|ENSMUSG00000005583|ENSMUSG00000020893|ENSMUSG00000063142|ENSMUSG00000026812|ENSMUSG00000074207|ENSMUSG00000031075|ENSMUSG00000075701|ENSMUSG00000015812|…	http://amigo.geneontology.org/cgi-bin/amigo/term_details?term=GO:1901700
cation binding	Gene Ontology	GO:0043169	275	3165	1.48139e-08	8.29388e-07	ENSMUSG00000024070|ENSMUSG00000027540|ENSMUSG00000032010|ENSMUSG00000054967|ENSMUSG00000030218|ENSMUSG00000021712|ENSMUSG00000058624|ENSMUSG00000020696|ENSMUSG00000028341|ENSMUSG00000057719|ENSMUSG00000029055|ENSMUSG00000019278|ENSMUSG00000058301|ENSMUSG00000049858|ENSMUSG00000033014|ENSMUSG00000026083|ENSMUSG00000003484|ENSMUSG00000058886|ENSMUSG00000036036|ENSMUSG00000001065|ENSMUSG00000017548|…	http://amigo.geneontology.org/cgi-bin/amigo/term_details?term=GO:0043169
positive regulation of nitrogen compound metabolic process	Gene Ontology	GO:0051173	152	1508	1.50798e-08	8.389e-07	ENSMUSG00000048583|ENSMUSG00000006575|ENSMUSG00000028023|ENSMUSG00000038256|ENSMUSG00000028341|ENSMUSG00000030110|ENSMUSG00000041974|ENSMUSG00000045005|ENSMUSG00000058301|ENSMUSG00000033335|ENSMUSG00000030849|ENSMUSG00000021134|ENSMUSG00000058886|ENSMUSG00000020115|ENSMUSG00000019777|ENSMUSG00000024176|ENSMUSG00000005583|ENSMUSG00000063632|ENSMUSG00000021103|ENSMUSG00000002102|ENSMUSG00000014303|…	http://amigo.geneontology.org/cgi-bin/amigo/term_details?term=GO:0051173
positive regulation of signaling	Gene Ontology	GO:0023056	134	1282	1.66125e-08	9.18311e-07	ENSMUSG00000048583|ENSMUSG00000050395|ENSMUSG00000027540|ENSMUSG00000025856|ENSMUSG00000031586|ENSMUSG00000045005|ENSMUSG00000029203|ENSMUSG00000030849|ENSMUSG00000004814|ENSMUSG00000004054|ENSMUSG00000019777|ENSMUSG00000015120|ENSMUSG00000063632|ENSMUSG00000049044|ENSMUSG00000027947|ENSMUSG00000059146|ENSMUSG00000031883|ENSMUSG00000031075|ENSMUSG00000029335|ENSMUSG00000030471|ENSMUSG00000025326|…	http://amigo.geneontology.org/cgi-bin/amigo/term_details?term=GO:0023056
positive regulation of protein modification process	Gene Ontology	GO:0031401	106	938	1.67783e-08	9.21648e-07	ENSMUSG00000048583|ENSMUSG00000050395|ENSMUSG00000027540|ENSMUSG00000031603|ENSMUSG00000025856|ENSMUSG00000031586|ENSMUSG00000036923|ENSMUSG00000030110|ENSMUSG00000045005|ENSMUSG00000029203|ENSMUSG00000030849|ENSMUSG00000004054|ENSMUSG00000004814|ENSMUSG00000015120|ENSMUSG00000052539|ENSMUSG00000027947|ENSMUSG00000059146|ENSMUSG00000033417|ENSMUSG00000005320|ENSMUSG00000022791|ENSMUSG00000029335|…	http://amigo.geneontology.org/cgi-bin/amigo/term_details?term=GO:0031401
membrane part	Gene Ontology	GO:0044425	414	5174	1.785e-08	9.74388e-07	ENSMUSG00000029510|ENSMUSG00000023923|ENSMUSG00000092586|ENSMUSG00000059327|ENSMUSG00000050558|ENSMUSG00000030110|ENSMUSG00000037242|ENSMUSG00000023286|ENSMUSG00000030849|ENSMUSG00000049940|ENSMUSG00000023367|ENSMUSG00000018672|ENSMUSG00000032336|ENSMUSG00000031904|ENSMUSG00000063142|ENSMUSG00000027947|ENSMUSG00000038916|ENSMUSG00000059146|ENSMUSG00000031881|ENSMUSG00000002781|ENSMUSG00000032028|…	http://amigo.geneontology.org/cgi-bin/amigo/term_details?term=GO:0044425
regulation of cell proliferation	Gene Ontology	GO:0042127	138	1337	2.01674e-08	1.09405e-06	ENSMUSG00000048583|ENSMUSG00000020937|ENSMUSG00000028023|ENSMUSG00000025856|ENSMUSG00000034165|ENSMUSG00000028341|ENSMUSG00000045005|ENSMUSG00000040841|ENSMUSG00000030849|ENSMUSG00000004814|ENSMUSG00000017548|ENSMUSG00000028821|ENSMUSG00000019777|ENSMUSG00000024176|ENSMUSG00000005583|ENSMUSG00000063632|ENSMUSG00000021103|ENSMUSG00000060038|ENSMUSG00000026812|ENSMUSG00000059146|ENSMUSG00000033417|…	http://amigo.geneontology.org/cgi-bin/amigo/term_details?term=GO:0042127
cellular response to chemical stimulus	Gene Ontology	GO:0070887	180	1883	2.21715e-08	1.18833e-06	ENSMUSG00000048583|ENSMUSG00000020300|ENSMUSG00000027540|ENSMUSG00000020696|ENSMUSG00000028341|ENSMUSG00000030110|ENSMUSG00000041974|ENSMUSG00000019278|ENSMUSG00000037242|ENSMUSG00000058301|ENSMUSG00000029203|ENSMUSG00000033014|ENSMUSG00000033335|ENSMUSG00000030849|ENSMUSG00000004814|ENSMUSG00000042306|ENSMUSG00000030595|ENSMUSG00000004698|ENSMUSG00000019777|ENSMUSG00000015120|ENSMUSG00000063632|…	http://amigo.geneontology.org/cgi-bin/amigo/term_details?term=GO:0070887
regulation of protein localization	Gene Ontology	GO:0032880	98	848	2.21775e-08	1.18833e-06	ENSMUSG00000030216|ENSMUSG00000050395|ENSMUSG00000027540|ENSMUSG00000057123|ENSMUSG00000059327|ENSMUSG00000031586|ENSMUSG00000041974|ENSMUSG00000045005|ENSMUSG00000024873|ENSMUSG00000023286|ENSMUSG00000010517|ENSMUSG00000025006|ENSMUSG00000032336|ENSMUSG00000030595|ENSMUSG00000035621|ENSMUSG00000031842|ENSMUSG00000029524|ENSMUSG00000032497|ENSMUSG00000031075|ENSMUSG00000035828|ENSMUSG00000034435|…	http://amigo.geneontology.org/cgi-bin/amigo/term_details?term=GO:0032880
positive regulation of signal transduction	Gene Ontology	GO:0009967	121	1129	2.46154e-08	1.31092e-06	ENSMUSG00000048583|ENSMUSG00000050395|ENSMUSG00000027540|ENSMUSG00000031603|ENSMUSG00000025856|ENSMUSG00000031586|ENSMUSG00000045005|ENSMUSG00000029203|ENSMUSG00000030849|ENSMUSG00000004814|ENSMUSG00000004054|ENSMUSG00000002233|ENSMUSG00000015120|ENSMUSG00000063632|ENSMUSG00000032356|ENSMUSG00000027947|ENSMUSG00000059146|ENSMUSG00000029335|ENSMUSG00000059327|ENSMUSG00000025326|ENSMUSG00000005514|…	http://amigo.geneontology.org/cgi-bin/amigo/term_details?term=GO:0009967
signal transduction by protein phosphorylation	Gene Ontology	GO:0023014	79	631	2.69953e-08	1.42895e-06	ENSMUSG00000031024|ENSMUSG00000048583|ENSMUSG00000036390|ENSMUSG00000029410|ENSMUSG00000016528|ENSMUSG00000049313|ENSMUSG00000022382|ENSMUSG00000037992|ENSMUSG00000020053|ENSMUSG00000064330|ENSMUSG00000040183|ENSMUSG00000046709|ENSMUSG00000025856|ENSMUSG00000027954|ENSMUSG00000003032|ENSMUSG00000021360|ENSMUSG00000030110|ENSMUSG00000053965|ENSMUSG00000005534|ENSMUSG00000024182|ENSMUSG00000031565|…	http://amigo.geneontology.org/cgi-bin/amigo/term_details?term=GO:0023014
carbohydrate derivative binding	Gene Ontology	GO:0097367	181	1903	2.80137e-08	1.47393e-06	ENSMUSG00000029510|ENSMUSG00000024070|ENSMUSG00000049892|ENSMUSG00000021712|ENSMUSG00000024878|ENSMUSG00000016528|ENSMUSG00000030110|ENSMUSG00000022561|ENSMUSG00000058301|ENSMUSG00000029203|ENSMUSG00000023286|ENSMUSG00000033335|ENSMUSG00000030849|ENSMUSG00000028933|ENSMUSG00000022176|ENSMUSG00000004054|ENSMUSG00000020385|ENSMUSG00000030249|ENSMUSG00000020115|ENSMUSG00000070056|ENSMUSG00000015120|…	http://amigo.geneontology.org/cgi-bin/amigo/term_details?term=GO:0097367
protein localization	Gene Ontology	GO:0008104	193	2063	2.82988e-08	1.48001e-06	ENSMUSG00000032336|ENSMUSG00000030216|ENSMUSG00000026491|ENSMUSG00000050395|ENSMUSG00000021660|ENSMUSG00000027540|ENSMUSG00000023923|ENSMUSG00000057123|ENSMUSG00000059327|ENSMUSG00000029192|ENSMUSG00000031586|ENSMUSG00000020696|ENSMUSG00000041974|ENSMUSG00000020454|ENSMUSG00000045005|ENSMUSG00000025484|ENSMUSG00000024873|ENSMUSG00000026074|ENSMUSG00000023286|ENSMUSG00000033335|ENSMUSG00000028998|…	http://amigo.geneontology.org/cgi-bin/amigo/term_details?term=GO:0008104
vesicle	Gene Ontology	GO:0031982	267	3080	3.09262e-08	1.6078e-06	ENSMUSG00000048583|ENSMUSG00000023262|ENSMUSG00000070427|ENSMUSG00000036707|ENSMUSG00000001687|ENSMUSG00000045733|ENSMUSG00000020263|ENSMUSG00000030218|ENSMUSG00000021712|ENSMUSG00000058624|ENSMUSG00000020696|ENSMUSG00000021266|ENSMUSG00000016528|ENSMUSG00000071072|ENSMUSG00000026491|ENSMUSG00000019278|ENSMUSG00000037242|ENSMUSG00000029203|ENSMUSG00000032353|ENSMUSG00000031785|ENSMUSG00000030849|…	http://amigo.geneontology.org/cgi-bin/amigo/term_details?term=GO:0031982
small molecule binding	Gene Ontology	GO:0036094	202	2188	3.24192e-08	1.67544e-06	ENSMUSG00000020300|ENSMUSG00000024070|ENSMUSG00000063428|ENSMUSG00000049892|ENSMUSG00000021712|ENSMUSG00000031586|ENSMUSG00000024878|ENSMUSG00000016528|ENSMUSG00000030110|ENSMUSG00000058301|ENSMUSG00000029203|ENSMUSG00000023286|ENSMUSG00000033335|ENSMUSG00000030849|ENSMUSG00000021134|ENSMUSG00000028933|ENSMUSG00000030847|ENSMUSG00000022176|ENSMUSG00000004054|ENSMUSG00000020385|ENSMUSG00000030249|…	http://amigo.geneontology.org/cgi-bin/amigo/term_details?term=GO:0036094
nucleotide binding	Gene Ontology	GO:0000166	188	2008	4.17891e-08	2.13442e-06	ENSMUSG00000020300|ENSMUSG00000024070|ENSMUSG00000063428|ENSMUSG00000049892|ENSMUSG00000021712|ENSMUSG00000031586|ENSMUSG00000024878|ENSMUSG00000016528|ENSMUSG00000030110|ENSMUSG00000058301|ENSMUSG00000029203|ENSMUSG00000023286|ENSMUSG00000033335|ENSMUSG00000030849|ENSMUSG00000028933|ENSMUSG00000030847|ENSMUSG00000022176|ENSMUSG00000004054|ENSMUSG00000020385|ENSMUSG00000030249|ENSMUSG00000020115|…	http://amigo.geneontology.org/cgi-bin/amigo/term_details?term=GO:0000166
nucleoside phosphate binding	Gene Ontology	GO:1901265	188	2008	4.17891e-08	2.13442e-06	ENSMUSG00000020300|ENSMUSG00000024070|ENSMUSG00000063428|ENSMUSG00000049892|ENSMUSG00000021712|ENSMUSG00000031586|ENSMUSG00000024878|ENSMUSG00000016528|ENSMUSG00000030110|ENSMUSG00000058301|ENSMUSG00000029203|ENSMUSG00000023286|ENSMUSG00000033335|ENSMUSG00000030849|ENSMUSG00000028933|ENSMUSG00000030847|ENSMUSG00000022176|ENSMUSG00000004054|ENSMUSG00000020385|ENSMUSG00000030249|ENSMUSG00000020115|…	http://amigo.geneontology.org/cgi-bin/amigo/term_details?term=GO:1901265
regulation of response to stress	Gene Ontology	GO:0080134	110	1006	4.31625e-08	2.19175e-06	ENSMUSG00000048583|ENSMUSG00000027540|ENSMUSG00000059325|ENSMUSG00000025856|ENSMUSG00000016528|ENSMUSG00000041974|ENSMUSG00000045005|ENSMUSG00000029203|ENSMUSG00000004054|ENSMUSG00000020115|ENSMUSG00000004814|ENSMUSG00000005583|ENSMUSG00000052539|ENSMUSG00000024049|ENSMUSG00000029657|ENSMUSG00000059146|ENSMUSG00000032497|ENSMUSG00000031883|ENSMUSG00000075701|ENSMUSG00000031548|ENSMUSG00000038642|…	http://amigo.geneontology.org/cgi-bin/amigo/term_details?term=GO:0080134
movement of cell or subcellular component	Gene Ontology	GO:0006928	146	1460	4.66426e-08	2.35478e-06	ENSMUSG00000028023|ENSMUSG00000025856|ENSMUSG00000033152|ENSMUSG00000020696|ENSMUSG00000036144|ENSMUSG00000028341|ENSMUSG00000030110|ENSMUSG00000029207|ENSMUSG00000019278|ENSMUSG00000037242|ENSMUSG00000024873|ENSMUSG00000002985|ENSMUSG00000026414|ENSMUSG00000004591|ENSMUSG00000066235|ENSMUSG00000029291|ENSMUSG00000004814|ENSMUSG00000024176|ENSMUSG00000005583|ENSMUSG00000054808|ENSMUSG00000032826|…	http://amigo.geneontology.org/cgi-bin/amigo/term_details?term=GO:0006928
MAPK cascade	Gene Ontology	GO:0000165	78	629	4.74498e-08	2.38176e-06	ENSMUSG00000031024|ENSMUSG00000048583|ENSMUSG00000036390|ENSMUSG00000029410|ENSMUSG00000016528|ENSMUSG00000049313|ENSMUSG00000022382|ENSMUSG00000037992|ENSMUSG00000020053|ENSMUSG00000064330|ENSMUSG00000040183|ENSMUSG00000046709|ENSMUSG00000025856|ENSMUSG00000027954|ENSMUSG00000003032|ENSMUSG00000021360|ENSMUSG00000030110|ENSMUSG00000053965|ENSMUSG00000005534|ENSMUSG00000024182|ENSMUSG00000031565|…	http://amigo.geneontology.org/cgi-bin/amigo/term_details?term=GO:0000165
macromolecule localization	Gene Ontology	GO:0033036	212	2337	4.95296e-08	2.47195e-06	ENSMUSG00000032336|ENSMUSG00000030216|ENSMUSG00000026491|ENSMUSG00000050395|ENSMUSG00000021660|ENSMUSG00000027540|ENSMUSG00000023923|ENSMUSG00000057123|ENSMUSG00000059327|ENSMUSG00000029192|ENSMUSG00000031586|ENSMUSG00000020696|ENSMUSG00000046027|ENSMUSG00000021264|ENSMUSG00000041974|ENSMUSG00000020454|ENSMUSG00000045005|ENSMUSG00000025484|ENSMUSG00000024873|ENSMUSG00000026074|ENSMUSG00000023286|…	http://amigo.geneontology.org/cgi-bin/amigo/term_details?term=GO:0033036
negative regulation of response to stimulus	Gene Ontology	GO:0048585	125	1195	4.99546e-08	2.479e-06	ENSMUSG00000048583|ENSMUSG00000027540|ENSMUSG00000025856|ENSMUSG00000020696|ENSMUSG00000028341|ENSMUSG00000033014|ENSMUSG00000033335|ENSMUSG00000017548|ENSMUSG00000030595|ENSMUSG00000019777|ENSMUSG00000020893|ENSMUSG00000026812|ENSMUSG00000014303|ENSMUSG00000075701|ENSMUSG00000026825|ENSMUSG00000035828|ENSMUSG00000061288|ENSMUSG00000019768|ENSMUSG00000025512|ENSMUSG00000020108|ENSMUSG00000030170|…	http://amigo.geneontology.org/cgi-bin/amigo/term_details?term=GO:0048585
positive regulation of phosphate metabolic process	Gene Ontology	GO:0045937	102	913	5.27349e-08	2.58315e-06	ENSMUSG00000048583|ENSMUSG00000050395|ENSMUSG00000027540|ENSMUSG00000006575|ENSMUSG00000025856|ENSMUSG00000031586|ENSMUSG00000036923|ENSMUSG00000030110|ENSMUSG00000045005|ENSMUSG00000029203|ENSMUSG00000030849|ENSMUSG00000004054|ENSMUSG00000004814|ENSMUSG00000005583|ENSMUSG00000052539|ENSMUSG00000027947|ENSMUSG00000059146|ENSMUSG00000033417|ENSMUSG00000005320|ENSMUSG00000022791|ENSMUSG00000029335|…	http://amigo.geneontology.org/cgi-bin/amigo/term_details?term=GO:0045937
positive regulation of phosphorus metabolic process	Gene Ontology	GO:0010562	102	913	5.27349e-08	2.58315e-06	ENSMUSG00000048583|ENSMUSG00000050395|ENSMUSG00000027540|ENSMUSG00000006575|ENSMUSG00000025856|ENSMUSG00000031586|ENSMUSG00000036923|ENSMUSG00000030110|ENSMUSG00000045005|ENSMUSG00000029203|ENSMUSG00000030849|ENSMUSG00000004054|ENSMUSG00000004814|ENSMUSG00000005583|ENSMUSG00000052539|ENSMUSG00000027947|ENSMUSG00000059146|ENSMUSG00000033417|ENSMUSG00000005320|ENSMUSG00000022791|ENSMUSG00000029335|…	http://amigo.geneontology.org/cgi-bin/amigo/term_details?term=GO:0010562
macromolecular complex	Gene Ontology	GO:0032991	336	4083	5.29408e-08	2.58315e-06	ENSMUSG00000056770|ENSMUSG00000030216|ENSMUSG00000020300|ENSMUSG00000002017|ENSMUSG00000006304|ENSMUSG00000055531|ENSMUSG00000057469|ENSMUSG00000023923|ENSMUSG00000057123|ENSMUSG00000020263|ENSMUSG00000030218|ENSMUSG00000028023|ENSMUSG00000059327|ENSMUSG00000003970|ENSMUSG00000075701|ENSMUSG00000031586|ENSMUSG00000020696|ENSMUSG00000028341|ENSMUSG00000030110|ENSMUSG00000071072|ENSMUSG00000026491|…	http://amigo.geneontology.org/cgi-bin/amigo/term_details?term=GO:0032991
positive regulation of protein phosphorylation	Gene Ontology	GO:0001934	90	771	5.59509e-08	2.71486e-06	ENSMUSG00000048583|ENSMUSG00000050395|ENSMUSG00000027540|ENSMUSG00000031603|ENSMUSG00000025856|ENSMUSG00000031586|ENSMUSG00000036923|ENSMUSG00000030110|ENSMUSG00000030562|ENSMUSG00000029203|ENSMUSG00000030849|ENSMUSG00000004054|ENSMUSG00000070509|ENSMUSG00000052539|ENSMUSG00000027947|ENSMUSG00000059146|ENSMUSG00000033417|ENSMUSG00000005320|ENSMUSG00000022791|ENSMUSG00000029335|ENSMUSG00000061288|…	http://amigo.geneontology.org/cgi-bin/amigo/term_details?term=GO:0001934
single-organism transport	Gene Ontology	GO:0044765	194	2101	6.27394e-08	3.02743e-06	ENSMUSG00000050395|ENSMUSG00000021135|ENSMUSG00000020261|ENSMUSG00000057123|ENSMUSG00000059327|ENSMUSG00000037573|ENSMUSG00000031586|ENSMUSG00000046027|ENSMUSG00000021265|ENSMUSG00000003072|ENSMUSG00000024873|ENSMUSG00000028631|ENSMUSG00000002985|ENSMUSG00000003484|ENSMUSG00000030849|ENSMUSG00000010517|ENSMUSG00000020782|ENSMUSG00000066232|ENSMUSG00000030595|ENSMUSG00000031904|ENSMUSG00000026778|…	http://amigo.geneontology.org/cgi-bin/amigo/term_details?term=GO:0044765
regulation of cell death	Gene Ontology	GO:0010941	137	1353	6.44626e-08	3.0935e-06	ENSMUSG00000020300|ENSMUSG00000050395|ENSMUSG00000027540|ENSMUSG00000020696|ENSMUSG00000028341|ENSMUSG00000029207|ENSMUSG00000019278|ENSMUSG00000030562|ENSMUSG00000030849|ENSMUSG00000028933|ENSMUSG00000039959|ENSMUSG00000030847|ENSMUSG00000004054|ENSMUSG00000026234|ENSMUSG00000019777|ENSMUSG00000024176|ENSMUSG00000005583|ENSMUSG00000063632|ENSMUSG00000021103|ENSMUSG00000063142|ENSMUSG00000029524|…	http://amigo.geneontology.org/cgi-bin/amigo/term_details?term=GO:0010941
cellular response to stress	Gene Ontology	GO:0033554	140	1392	6.61099e-08	3.15521e-06	ENSMUSG00000020300|ENSMUSG00000027540|ENSMUSG00000023923|ENSMUSG00000030219|ENSMUSG00000028341|ENSMUSG00000021264|ENSMUSG00000041974|ENSMUSG00000045005|ENSMUSG00000058301|ENSMUSG00000029203|ENSMUSG00000023286|ENSMUSG00000028933|ENSMUSG00000004054|ENSMUSG00000028821|ENSMUSG00000019777|ENSMUSG00000005583|ENSMUSG00000052539|ENSMUSG00000021103|ENSMUSG00000029524|ENSMUSG00000024049|ENSMUSG00000030161|…	http://amigo.geneontology.org/cgi-bin/amigo/term_details?term=GO:0033554
positive regulation of intracellular signal transduction	Gene Ontology	GO:1902533	88	751	6.75778e-08	3.20774e-06	ENSMUSG00000048583|ENSMUSG00000050395|ENSMUSG00000027540|ENSMUSG00000031603|ENSMUSG00000025856|ENSMUSG00000045005|ENSMUSG00000030849|ENSMUSG00000004054|ENSMUSG00000019777|ENSMUSG00000015120|ENSMUSG00000052539|ENSMUSG00000032356|ENSMUSG00000054808|ENSMUSG00000059146|ENSMUSG00000030471|ENSMUSG00000025326|ENSMUSG00000061288|ENSMUSG00000059327|ENSMUSG00000000394|ENSMUSG00000031392|ENSMUSG00000036390|…	http://amigo.geneontology.org/cgi-bin/amigo/term_details?term=GO:1902533
positive regulation of cellular biosynthetic process	Gene Ontology	GO:0031328	147	1485	7.39299e-08	3.47786e-06	ENSMUSG00000048583|ENSMUSG00000006575|ENSMUSG00000028023|ENSMUSG00000038256|ENSMUSG00000028341|ENSMUSG00000030110|ENSMUSG00000045005|ENSMUSG00000033335|ENSMUSG00000030849|ENSMUSG00000058886|ENSMUSG00000020115|ENSMUSG00000019777|ENSMUSG00000024176|ENSMUSG00000005583|ENSMUSG00000063632|ENSMUSG00000021103|ENSMUSG00000014303|ENSMUSG00000056770|ENSMUSG00000030470|ENSMUSG00000025856|ENSMUSG00000025326|…	http://amigo.geneontology.org/cgi-bin/amigo/term_details?term=GO:0031328
negative regulation of cell communication	Gene Ontology	GO:0010648	111	1030	7.40648e-08	3.47786e-06	ENSMUSG00000027540|ENSMUSG00000020696|ENSMUSG00000033014|ENSMUSG00000033335|ENSMUSG00000017548|ENSMUSG00000030595|ENSMUSG00000035621|ENSMUSG00000026778|ENSMUSG00000020893|ENSMUSG00000029524|ENSMUSG00000026812|ENSMUSG00000014303|ENSMUSG00000075701|ENSMUSG00000038332|ENSMUSG00000035828|ENSMUSG00000061288|ENSMUSG00000019768|ENSMUSG00000020108|ENSMUSG00000051149|ENSMUSG00000030170|ENSMUSG00000026826|…	http://amigo.geneontology.org/cgi-bin/amigo/term_details?term=GO:0010648
tissue morphogenesis	Gene Ontology	GO:0048729	72	569	7.6893e-08	3.59135e-06	ENSMUSG00000020170|ENSMUSG00000020053|ENSMUSG00000020173|ENSMUSG00000070509|ENSMUSG00000022382|ENSMUSG00000037992|ENSMUSG00000038402|ENSMUSG00000040183|ENSMUSG00000028023|ENSMUSG00000025856|ENSMUSG00000005251|ENSMUSG00000003032|ENSMUSG00000021466|ENSMUSG00000028341|ENSMUSG00000030110|ENSMUSG00000022528|ENSMUSG00000000881|ENSMUSG00000031565|ENSMUSG00000026235|ENSMUSG00000030218|ENSMUSG00000024182|…	http://amigo.geneontology.org/cgi-bin/amigo/term_details?term=GO:0048729
negative regulation of signaling	Gene Ontology	GO:0023057	111	1032	8.10767e-08	3.74621e-06	ENSMUSG00000027540|ENSMUSG00000020696|ENSMUSG00000033014|ENSMUSG00000033335|ENSMUSG00000017548|ENSMUSG00000030595|ENSMUSG00000035621|ENSMUSG00000026778|ENSMUSG00000020893|ENSMUSG00000029524|ENSMUSG00000026812|ENSMUSG00000014303|ENSMUSG00000075701|ENSMUSG00000038332|ENSMUSG00000035828|ENSMUSG00000061288|ENSMUSG00000019768|ENSMUSG00000020108|ENSMUSG00000051149|ENSMUSG00000030170|ENSMUSG00000026826|…	http://amigo.geneontology.org/cgi-bin/amigo/term_details?term=GO:0023057
morphogenesis of an epithelium	Gene Ontology	GO:0002009	64	481	8.11584e-08	3.74621e-06	ENSMUSG00000020170|ENSMUSG00000020173|ENSMUSG00000070509|ENSMUSG00000022382|ENSMUSG00000037992|ENSMUSG00000038402|ENSMUSG00000040183|ENSMUSG00000028023|ENSMUSG00000025856|ENSMUSG00000005251|ENSMUSG00000003032|ENSMUSG00000021466|ENSMUSG00000030110|ENSMUSG00000022528|ENSMUSG00000000881|ENSMUSG00000031565|ENSMUSG00000026235|ENSMUSG00000030218|ENSMUSG00000037016|ENSMUSG00000040728|ENSMUSG00000030849|…	http://amigo.geneontology.org/cgi-bin/amigo/term_details?term=GO:0002009
regulation of cellular component movement	Gene Ontology	GO:0051270	86	731	8.14954e-08	3.74621e-06	ENSMUSG00000028023|ENSMUSG00000025856|ENSMUSG00000020696|ENSMUSG00000010760|ENSMUSG00000030110|ENSMUSG00000019278|ENSMUSG00000030562|ENSMUSG00000024873|ENSMUSG00000026414|ENSMUSG00000004591|ENSMUSG00000029291|ENSMUSG00000004814|ENSMUSG00000021699|ENSMUSG00000032826|ENSMUSG00000059146|ENSMUSG00000039936|ENSMUSG00000015812|ENSMUSG00000028211|ENSMUSG00000028832|ENSMUSG00000020074|ENSMUSG00000030170|…	http://amigo.geneontology.org/cgi-bin/amigo/term_details?term=GO:0051270
peptidyl-amino acid modification	Gene Ontology	GO:0018193	96	852	9.17802e-08	4.1969e-06	ENSMUSG00000048583|ENSMUSG00000037808|ENSMUSG00000027540|ENSMUSG00000030350|ENSMUSG00000025856|ENSMUSG00000016528|ENSMUSG00000030110|ENSMUSG00000041975|ENSMUSG00000029203|ENSMUSG00000002728|ENSMUSG00000030849|ENSMUSG00000004591|ENSMUSG00000020385|ENSMUSG00000017548|ENSMUSG00000020115|ENSMUSG00000019777|ENSMUSG00000015120|ENSMUSG00000020893|ENSMUSG00000029524|ENSMUSG00000060038|ENSMUSG00000021699|…	http://amigo.geneontology.org/cgi-bin/amigo/term_details?term=GO:0018193
macromolecular complex binding	Gene Ontology	GO:0044877	127	1236	9.66166e-08	4.39505e-06	ENSMUSG00000048583|ENSMUSG00000020300|ENSMUSG00000027540|ENSMUSG00000023923|ENSMUSG00000028023|ENSMUSG00000025856|ENSMUSG00000017485|ENSMUSG00000037242|ENSMUSG00000058301|ENSMUSG00000033335|ENSMUSG00000030847|ENSMUSG00000017548|ENSMUSG00000025504|ENSMUSG00000019777|ENSMUSG00000005583|ENSMUSG00000020893|ENSMUSG00000063142|ENSMUSG00000032498|ENSMUSG00000054808|ENSMUSG00000018189|ENSMUSG00000027656|…	http://amigo.geneontology.org/cgi-bin/amigo/term_details?term=GO:0044877
molecular function regulator	Gene Ontology	GO:0098772	111	1038	1.06111e-07	4.80194e-06	ENSMUSG00000048583|ENSMUSG00000030216|ENSMUSG00000070427|ENSMUSG00000006575|ENSMUSG00000029192|ENSMUSG00000057719|ENSMUSG00000019278|ENSMUSG00000024873|ENSMUSG00000056978|ENSMUSG00000030847|ENSMUSG00000001768|ENSMUSG00000025504|ENSMUSG00000030249|ENSMUSG00000004952|ENSMUSG00000023923|ENSMUSG00000024663|ENSMUSG00000032356|ENSMUSG00000020374|ENSMUSG00000026812|ENSMUSG00000032826|ENSMUSG00000018189|…	http://amigo.geneontology.org/cgi-bin/amigo/term_details?term=GO:0098772
negative regulation of metabolic process	Gene Ontology	GO:0009892	186	2015	1.24676e-07	5.61299e-06	ENSMUSG00000020300|ENSMUSG00000027540|ENSMUSG00000035621|ENSMUSG00000059325|ENSMUSG00000025856|ENSMUSG00000020696|ENSMUSG00000028341|ENSMUSG00000057719|ENSMUSG00000019278|ENSMUSG00000058301|ENSMUSG00000040841|ENSMUSG00000030849|ENSMUSG00000049313|ENSMUSG00000058886|ENSMUSG00000017548|ENSMUSG00000004698|ENSMUSG00000019777|ENSMUSG00000024176|ENSMUSG00000015120|ENSMUSG00000063632|ENSMUSG00000029524|…	http://amigo.geneontology.org/cgi-bin/amigo/term_details?term=GO:0009892
macromolecular complex subunit organization	Gene Ontology	GO:0043933	169	1793	1.47798e-07	6.61981e-06	ENSMUSG00000026491|ENSMUSG00000059325|ENSMUSG00000030350|ENSMUSG00000058624|ENSMUSG00000041975|ENSMUSG00000041974|ENSMUSG00000058301|ENSMUSG00000029203|ENSMUSG00000033335|ENSMUSG00000028933|ENSMUSG00000026414|ENSMUSG00000032405|ENSMUSG00000017548|ENSMUSG00000039450|ENSMUSG00000004698|ENSMUSG00000019777|ENSMUSG00000020893|ENSMUSG00000063142|ENSMUSG00000060038|ENSMUSG00000061175|ENSMUSG00000026812|…	http://amigo.geneontology.org/cgi-bin/amigo/term_details?term=GO:0043933
cellular developmental process	Gene Ontology	GO:0048869	296	3553	1.53843e-07	6.85543e-06	ENSMUSG00000048583|ENSMUSG00000029510|ENSMUSG00000062252|ENSMUSG00000055003|ENSMUSG00000059325|ENSMUSG00000028023|ENSMUSG00000059327|ENSMUSG00000037573|ENSMUSG00000042211|ENSMUSG00000024352|ENSMUSG00000028176|ENSMUSG00000028341|ENSMUSG00000030110|ENSMUSG00000041975|ENSMUSG00000029207|ENSMUSG00000020454|ENSMUSG00000037242|ENSMUSG00000048546|ENSMUSG00000030218|ENSMUSG00000040841|ENSMUSG00000030849|…	http://amigo.geneontology.org/cgi-bin/amigo/term_details?term=GO:0048869
membrane-bounded vesicle	Gene Ontology	GO:0031988	242	2791	1.5779e-07	6.99564e-06	ENSMUSG00000048583|ENSMUSG00000023262|ENSMUSG00000070427|ENSMUSG00000036707|ENSMUSG00000001687|ENSMUSG00000023923|ENSMUSG00000020263|ENSMUSG00000030218|ENSMUSG00000021712|ENSMUSG00000058624|ENSMUSG00000020696|ENSMUSG00000021266|ENSMUSG00000016528|ENSMUSG00000071072|ENSMUSG00000026491|ENSMUSG00000019278|ENSMUSG00000037242|ENSMUSG00000029203|ENSMUSG00000032353|ENSMUSG00000031785|ENSMUSG00000049313|…	http://amigo.geneontology.org/cgi-bin/amigo/term_details?term=GO:0031988
positive regulation of biosynthetic process	Gene Ontology	GO:0009891	148	1519	1.60421e-07	7.07633e-06	ENSMUSG00000048583|ENSMUSG00000006575|ENSMUSG00000028023|ENSMUSG00000038256|ENSMUSG00000028341|ENSMUSG00000030110|ENSMUSG00000045005|ENSMUSG00000033335|ENSMUSG00000030849|ENSMUSG00000058886|ENSMUSG00000020115|ENSMUSG00000019777|ENSMUSG00000024176|ENSMUSG00000005583|ENSMUSG00000063632|ENSMUSG00000021103|ENSMUSG00000029524|ENSMUSG00000014303|ENSMUSG00000056770|ENSMUSG00000030470|ENSMUSG00000025856|…	http://amigo.geneontology.org/cgi-bin/amigo/term_details?term=GO:0009891
cytosol	Gene Ontology	GO:0005829	131	1300	1.63283e-07	7.16641e-06	ENSMUSG00000027540|ENSMUSG00000006575|ENSMUSG00000030350|ENSMUSG00000003970|ENSMUSG00000025326|ENSMUSG00000020454|ENSMUSG00000037242|ENSMUSG00000033335|ENSMUSG00000030847|ENSMUSG00000066232|ENSMUSG00000030595|ENSMUSG00000035621|ENSMUSG00000025509|ENSMUSG00000030161|ENSMUSG00000074207|ENSMUSG00000024042|ENSMUSG00000018189|ENSMUSG00000031883|ENSMUSG00000025289|ENSMUSG00000033174|ENSMUSG00000030057|…	http://amigo.geneontology.org/cgi-bin/amigo/term_details?term=GO:0005829
nervous system development	Gene Ontology	GO:0007399	170	1811	1.72765e-07	7.54467e-06	ENSMUSG00000053198|ENSMUSG00000029510|ENSMUSG00000003233|ENSMUSG00000028402|ENSMUSG00000062252|ENSMUSG00000029821|ENSMUSG00000055003|ENSMUSG00000028023|ENSMUSG00000042211|ENSMUSG00000028341|ENSMUSG00000030110|ENSMUSG00000029207|ENSMUSG00000020454|ENSMUSG00000033335|ENSMUSG00000030849|ENSMUSG00000028933|ENSMUSG00000032336|ENSMUSG00000066235|ENSMUSG00000029291|ENSMUSG00000019777|ENSMUSG00000024176|…	http://amigo.geneontology.org/cgi-bin/amigo/term_details?term=GO:0007399
cell migration	Gene Ontology	GO:0016477	112	1063	1.84247e-07	8.00602e-06	ENSMUSG00000028023|ENSMUSG00000025856|ENSMUSG00000033152|ENSMUSG00000020696|ENSMUSG00000010760|ENSMUSG00000030110|ENSMUSG00000029207|ENSMUSG00000019278|ENSMUSG00000037242|ENSMUSG00000004591|ENSMUSG00000066235|ENSMUSG00000029291|ENSMUSG00000004814|ENSMUSG00000024176|ENSMUSG00000005583|ENSMUSG00000054808|ENSMUSG00000059146|ENSMUSG00000022791|ENSMUSG00000039936|ENSMUSG00000037251|ENSMUSG00000015812|…	http://amigo.geneontology.org/cgi-bin/amigo/term_details?term=GO:0016477
cell cycle	Gene Ontology	GO:0007049	129	1278	1.87637e-07	8.11296e-06	ENSMUSG00000048583|ENSMUSG00000026491|ENSMUSG00000020263|ENSMUSG00000036923|ENSMUSG00000016528|ENSMUSG00000029207|ENSMUSG00000058301|ENSMUSG00000030849|ENSMUSG00000032782|ENSMUSG00000028933|ENSMUSG00000024277|ENSMUSG00000004591|ENSMUSG00000028821|ENSMUSG00000026778|ENSMUSG00000015120|ENSMUSG00000021103|ENSMUSG00000032498|ENSMUSG00000026812|ENSMUSG00000056305|ENSMUSG00000021693|ENSMUSG00000024042|…	http://amigo.geneontology.org/cgi-bin/amigo/term_details?term=GO:0007049
epithelium development	Gene Ontology	GO:0060429	104	965	1.93305e-07	8.31688e-06	ENSMUSG00000062252|ENSMUSG00000030218|ENSMUSG00000028023|ENSMUSG00000025856|ENSMUSG00000030110|ENSMUSG00000037242|ENSMUSG00000030849|ENSMUSG00000028933|ENSMUSG00000039457|ENSMUSG00000019777|ENSMUSG00000024176|ENSMUSG00000005583|ENSMUSG00000063632|ENSMUSG00000063142|ENSMUSG00000026812|ENSMUSG00000059146|ENSMUSG00000059327|ENSMUSG00000060969|ENSMUSG00000040407|ENSMUSG00000019768|ENSMUSG00000021125|…	http://amigo.geneontology.org/cgi-bin/amigo/term_details?term=GO:0060429
negative regulation of multicellular organismal process	Gene Ontology	GO:0051241	104	967	2.11583e-07	9.05864e-06	ENSMUSG00000025856|ENSMUSG00000036144|ENSMUSG00000020454|ENSMUSG00000033910|ENSMUSG00000023367|ENSMUSG00000017548|ENSMUSG00000004698|ENSMUSG00000019777|ENSMUSG00000024176|ENSMUSG00000005583|ENSMUSG00000063632|ENSMUSG00000063142|ENSMUSG00000021699|ENSMUSG00000037962|ENSMUSG00000059146|ENSMUSG00000075701|ENSMUSG00000025289|ENSMUSG00000073802|ENSMUSG00000025512|ENSMUSG00000021125|ENSMUSG00000031488|…	http://amigo.geneontology.org/cgi-bin/amigo/term_details?term=GO:0051241
cytoskeleton organization	Gene Ontology	GO:0007010	102	943	2.17398e-07	9.26221e-06	ENSMUSG00000027540|ENSMUSG00000025856|ENSMUSG00000058624|ENSMUSG00000030562|ENSMUSG00000032782|ENSMUSG00000028933|ENSMUSG00000026414|ENSMUSG00000025006|ENSMUSG00000037736|ENSMUSG00000029291|ENSMUSG00000019777|ENSMUSG00000005583|ENSMUSG00000065954|ENSMUSG00000032498|ENSMUSG00000026812|ENSMUSG00000037962|ENSMUSG00000022353|ENSMUSG00000021693|ENSMUSG00000059146|ENSMUSG00000075705|ENSMUSG00000030470|…	http://amigo.geneontology.org/cgi-bin/amigo/term_details?term=GO:0007010
cellular response to organic substance	Gene Ontology	GO:0071310	146	1502	2.22429e-07	9.43055e-06	ENSMUSG00000048583|ENSMUSG00000020300|ENSMUSG00000027540|ENSMUSG00000020696|ENSMUSG00000028341|ENSMUSG00000030110|ENSMUSG00000041974|ENSMUSG00000030562|ENSMUSG00000058301|ENSMUSG00000029203|ENSMUSG00000033014|ENSMUSG00000033335|ENSMUSG00000030849|ENSMUSG00000004814|ENSMUSG00000030595|ENSMUSG00000004698|ENSMUSG00000019777|ENSMUSG00000015120|ENSMUSG00000063632|ENSMUSG00000026812|ENSMUSG00000024042|…	http://amigo.geneontology.org/cgi-bin/amigo/term_details?term=GO:0071310
positive regulation of phosphorylation	Gene Ontology	GO:0042327	91	810	2.24581e-07	9.4758e-06	ENSMUSG00000048583|ENSMUSG00000050395|ENSMUSG00000027540|ENSMUSG00000031603|ENSMUSG00000025856|ENSMUSG00000031586|ENSMUSG00000036923|ENSMUSG00000030110|ENSMUSG00000030562|ENSMUSG00000029203|ENSMUSG00000030849|ENSMUSG00000004054|ENSMUSG00000070509|ENSMUSG00000052539|ENSMUSG00000027947|ENSMUSG00000059146|ENSMUSG00000033417|ENSMUSG00000005320|ENSMUSG00000022791|ENSMUSG00000029335|ENSMUSG00000061288|…	http://amigo.geneontology.org/cgi-bin/amigo/term_details?term=GO:0042327
regulation of anatomical structure morphogenesis	Gene Ontology	GO:0022603	98	896	2.3801e-07	9.99414e-06	ENSMUSG00000025856|ENSMUSG00000036923|ENSMUSG00000021266|ENSMUSG00000030110|ENSMUSG00000033335|ENSMUSG00000030849|ENSMUSG00000029669|ENSMUSG00000029291|ENSMUSG00000004814|ENSMUSG00000024176|ENSMUSG00000005583|ENSMUSG00000054808|ENSMUSG00000041598|ENSMUSG00000059146|ENSMUSG00000027394|ENSMUSG00000005514|ENSMUSG00000028745|ENSMUSG00000002546|ENSMUSG00000030967|ENSMUSG00000034881|ENSMUSG00000019768|…	http://amigo.geneontology.org/cgi-bin/amigo/term_details?term=GO:0022603
regulation of transferase activity	Gene Ontology	GO:0051338	79	669	2.40595e-07	1.00426e-05	ENSMUSG00000020170|ENSMUSG00000048583|ENSMUSG00000036390|ENSMUSG00000050395|ENSMUSG00000022382|ENSMUSG00000027540|ENSMUSG00000020053|ENSMUSG00000064330|ENSMUSG00000053965|ENSMUSG00000025856|ENSMUSG00000027954|ENSMUSG00000003032|ENSMUSG00000032083|ENSMUSG00000003031|ENSMUSG00000028519|ENSMUSG00000034683|ENSMUSG00000005534|ENSMUSG00000003233|ENSMUSG00000031565|ENSMUSG00000019214|ENSMUSG00000024182|…	http://amigo.geneontology.org/cgi-bin/amigo/term_details?term=GO:0051338
single-organism localization	Gene Ontology	GO:1902578	204	2281	2.41465e-07	1.00426e-05	ENSMUSG00000050395|ENSMUSG00000021135|ENSMUSG00000020261|ENSMUSG00000057123|ENSMUSG00000059327|ENSMUSG00000037573|ENSMUSG00000031586|ENSMUSG00000046027|ENSMUSG00000021265|ENSMUSG00000003072|ENSMUSG00000024873|ENSMUSG00000028631|ENSMUSG00000002985|ENSMUSG00000003484|ENSMUSG00000030849|ENSMUSG00000010517|ENSMUSG00000020782|ENSMUSG00000066232|ENSMUSG00000030595|ENSMUSG00000031904|ENSMUSG00000026778|…	http://amigo.geneontology.org/cgi-bin/amigo/term_details?term=GO:1902578
nucleoplasm	Gene Ontology	GO:0005654	166	1771	2.67261e-07	1.10628e-05	ENSMUSG00000030216|ENSMUSG00000024070|ENSMUSG00000055531|ENSMUSG00000020263|ENSMUSG00000031586|ENSMUSG00000016528|ENSMUSG00000057719|ENSMUSG00000041974|ENSMUSG00000017485|ENSMUSG00000058301|ENSMUSG00000033014|ENSMUSG00000030849|ENSMUSG00000004591|ENSMUSG00000025006|ENSMUSG00000054405|ENSMUSG00000066232|ENSMUSG00000004698|ENSMUSG00000019777|ENSMUSG00000015120|ENSMUSG00000021103|ENSMUSG00000032498|…	http://amigo.geneontology.org/cgi-bin/amigo/term_details?term=GO:0005654
cell differentiation	Gene Ontology	GO:0030154	275	3277	2.71523e-07	1.11862e-05	ENSMUSG00000048583|ENSMUSG00000029510|ENSMUSG00000062252|ENSMUSG00000055003|ENSMUSG00000059325|ENSMUSG00000028023|ENSMUSG00000059327|ENSMUSG00000042211|ENSMUSG00000024352|ENSMUSG00000028176|ENSMUSG00000028341|ENSMUSG00000030110|ENSMUSG00000041975|ENSMUSG00000029207|ENSMUSG00000020454|ENSMUSG00000037242|ENSMUSG00000048546|ENSMUSG00000030218|ENSMUSG00000040841|ENSMUSG00000030849|ENSMUSG00000031626|…	http://amigo.geneontology.org/cgi-bin/amigo/term_details?term=GO:0030154
regulation of MAPK cascade	Gene Ontology	GO:0043408	71	579	2.78106e-07	1.14037e-05	ENSMUSG00000031024|ENSMUSG00000048583|ENSMUSG00000036390|ENSMUSG00000029410|ENSMUSG00000049313|ENSMUSG00000022382|ENSMUSG00000037992|ENSMUSG00000020053|ENSMUSG00000064330|ENSMUSG00000040183|ENSMUSG00000030562|ENSMUSG00000025856|ENSMUSG00000027954|ENSMUSG00000003032|ENSMUSG00000021360|ENSMUSG00000053965|ENSMUSG00000005534|ENSMUSG00000024182|ENSMUSG00000031565|ENSMUSG00000038546|ENSMUSG00000046949|…	http://amigo.geneontology.org/cgi-bin/amigo/term_details?term=GO:0043408
response to external stimulus	Gene Ontology	GO:0009605	154	1617	3.16341e-07	1.29108e-05	ENSMUSG00000062252|ENSMUSG00000020300|ENSMUSG00000023923|ENSMUSG00000059325|ENSMUSG00000025856|ENSMUSG00000075701|ENSMUSG00000028341|ENSMUSG00000022565|ENSMUSG00000029207|ENSMUSG00000045005|ENSMUSG00000058301|ENSMUSG00000056978|ENSMUSG00000030847|ENSMUSG00000032327|ENSMUSG00000030595|ENSMUSG00000020115|ENSMUSG00000004814|ENSMUSG00000005583|ENSMUSG00000020893|ENSMUSG00000063142|ENSMUSG00000024049|…	http://amigo.geneontology.org/cgi-bin/amigo/term_details?term=GO:0009605
negative regulation of gene expression	Gene Ontology	GO:0010629	121	1191	3.38312e-07	1.37433e-05	ENSMUSG00000020300|ENSMUSG00000059325|ENSMUSG00000036923|ENSMUSG00000028341|ENSMUSG00000021264|ENSMUSG00000020454|ENSMUSG00000058301|ENSMUSG00000030849|ENSMUSG00000017548|ENSMUSG00000004698|ENSMUSG00000019777|ENSMUSG00000024176|ENSMUSG00000015120|ENSMUSG00000020893|ENSMUSG00000029524|ENSMUSG00000026812|ENSMUSG00000049892|ENSMUSG00000024042|ENSMUSG00000060032|ENSMUSG00000014303|ENSMUSG00000003032|…	http://amigo.geneontology.org/cgi-bin/amigo/term_details?term=GO:0010629
catalytic activity	Gene Ontology	GO:0003824	382	4840	3.41652e-07	1.37605e-05	ENSMUSG00000040415|ENSMUSG00000021712|ENSMUSG00000058624|ENSMUSG00000016528|ENSMUSG00000030110|ENSMUSG00000041975|ENSMUSG00000030562|ENSMUSG00000023286|ENSMUSG00000030849|ENSMUSG00000028933|ENSMUSG00000004054|ENSMUSG00000032336|ENSMUSG00000038582|ENSMUSG00000004698|ENSMUSG00000019777|ENSMUSG00000015120|ENSMUSG00000074207|ENSMUSG00000024042|ENSMUSG00000059146|ENSMUSG00000030204|ENSMUSG00000031883|…	http://amigo.geneontology.org/cgi-bin/amigo/term_details?term=GO:0003824
negative regulation of macromolecule metabolic process	Gene Ontology	GO:0010605	170	1832	3.41885e-07	1.37605e-05	ENSMUSG00000020300|ENSMUSG00000027540|ENSMUSG00000059325|ENSMUSG00000020696|ENSMUSG00000028341|ENSMUSG00000021264|ENSMUSG00000019278|ENSMUSG00000058301|ENSMUSG00000040841|ENSMUSG00000030849|ENSMUSG00000049313|ENSMUSG00000017548|ENSMUSG00000004698|ENSMUSG00000019777|ENSMUSG00000024176|ENSMUSG00000015120|ENSMUSG00000063632|ENSMUSG00000029524|ENSMUSG00000026812|ENSMUSG00000049892|ENSMUSG00000024042|…	http://amigo.geneontology.org/cgi-bin/amigo/term_details?term=GO:0010605
cellular response to oxygen-containing compound	Gene Ontology	GO:1901701	80	688	3.55153e-07	1.42289e-05	ENSMUSG00000048583|ENSMUSG00000020027|ENSMUSG00000026826|ENSMUSG00000020300|ENSMUSG00000021466|ENSMUSG00000038332|ENSMUSG00000037992|ENSMUSG00000020053|ENSMUSG00000031207|ENSMUSG00000019970|ENSMUSG00000054459|ENSMUSG00000075701|ENSMUSG00000018566|ENSMUSG00000034165|ENSMUSG00000056501|ENSMUSG00000028341|ENSMUSG00000030110|ENSMUSG00000005534|ENSMUSG00000032501|ENSMUSG00000030562|ENSMUSG00000058301|…	http://amigo.geneontology.org/cgi-bin/amigo/term_details?term=GO:1901701
protein complex	Gene Ontology	GO:0043234	288	3477	3.84797e-07	1.53462e-05	ENSMUSG00000027884|ENSMUSG00000002017|ENSMUSG00000006304|ENSMUSG00000055531|ENSMUSG00000057469|ENSMUSG00000023923|ENSMUSG00000020263|ENSMUSG00000030218|ENSMUSG00000028023|ENSMUSG00000059327|ENSMUSG00000075701|ENSMUSG00000089715|ENSMUSG00000020696|ENSMUSG00000028341|ENSMUSG00000030110|ENSMUSG00000071072|ENSMUSG00000026491|ENSMUSG00000017485|ENSMUSG00000037242|ENSMUSG00000058301|ENSMUSG00000024873|…	http://amigo.geneontology.org/cgi-bin/amigo/term_details?term=GO:0043234
cellular component assembly	Gene Ontology	GO:0022607	181	1984	3.87708e-07	1.5392e-05	ENSMUSG00000053198|ENSMUSG00000026491|ENSMUSG00000055003|ENSMUSG00000030218|ENSMUSG00000025856|ENSMUSG00000029192|ENSMUSG00000022565|ENSMUSG00000041974|ENSMUSG00000045005|ENSMUSG00000029203|ENSMUSG00000033335|ENSMUSG00000032782|ENSMUSG00000028933|ENSMUSG00000026414|ENSMUSG00000032405|ENSMUSG00000055531|ENSMUSG00000039450|ENSMUSG00000025504|ENSMUSG00000032336|ENSMUSG00000019777|ENSMUSG00000005583|…	http://amigo.geneontology.org/cgi-bin/amigo/term_details?term=GO:0022607
regulation of multicellular organismal development	Gene Ontology	GO:2000026	153	1611	4.04093e-07	1.59699e-05	ENSMUSG00000055003|ENSMUSG00000059325|ENSMUSG00000025856|ENSMUSG00000042211|ENSMUSG00000036144|ENSMUSG00000030110|ENSMUSG00000020454|ENSMUSG00000033335|ENSMUSG00000030849|ENSMUSG00000004814|ENSMUSG00000029669|ENSMUSG00000028933|ENSMUSG00000023367|ENSMUSG00000021266|ENSMUSG00000029291|ENSMUSG00000019777|ENSMUSG00000024176|ENSMUSG00000005583|ENSMUSG00000063632|ENSMUSG00000037962|ENSMUSG00000030218|…	http://amigo.geneontology.org/cgi-bin/amigo/term_details?term=GO:2000026
cell motility	Gene Ontology	GO:0048870	118	1161	4.67409e-07	1.83065e-05	ENSMUSG00000028023|ENSMUSG00000025856|ENSMUSG00000033152|ENSMUSG00000020696|ENSMUSG00000036144|ENSMUSG00000030110|ENSMUSG00000029207|ENSMUSG00000019278|ENSMUSG00000037242|ENSMUSG00000004591|ENSMUSG00000066235|ENSMUSG00000029291|ENSMUSG00000004814|ENSMUSG00000024176|ENSMUSG00000005583|ENSMUSG00000054808|ENSMUSG00000059146|ENSMUSG00000022791|ENSMUSG00000039936|ENSMUSG00000037251|ENSMUSG00000015812|…	http://amigo.geneontology.org/cgi-bin/amigo/term_details?term=GO:0048870
localization of cell	Gene Ontology	GO:0051674	118	1161	4.67409e-07	1.83065e-05	ENSMUSG00000028023|ENSMUSG00000025856|ENSMUSG00000033152|ENSMUSG00000020696|ENSMUSG00000036144|ENSMUSG00000030110|ENSMUSG00000029207|ENSMUSG00000019278|ENSMUSG00000037242|ENSMUSG00000004591|ENSMUSG00000066235|ENSMUSG00000029291|ENSMUSG00000004814|ENSMUSG00000024176|ENSMUSG00000005583|ENSMUSG00000054808|ENSMUSG00000059146|ENSMUSG00000022791|ENSMUSG00000039936|ENSMUSG00000037251|ENSMUSG00000015812|…	http://amigo.geneontology.org/cgi-bin/amigo/term_details?term=GO:0051674
embryonic morphogenesis	Gene Ontology	GO:0048598	69	566	4.95391e-07	1.93158e-05	ENSMUSG00000020170|ENSMUSG00000062252|ENSMUSG00000057123|ENSMUSG00000020173|ENSMUSG00000027523|ENSMUSG00000021466|ENSMUSG00000022382|ENSMUSG00000037992|ENSMUSG00000030110|ENSMUSG00000053279|ENSMUSG00000028023|ENSMUSG00000027954|ENSMUSG00000022895|ENSMUSG00000048904|ENSMUSG00000028341|ENSMUSG00000038402|ENSMUSG00000032083|ENSMUSG00000022528|ENSMUSG00000037025|ENSMUSG00000031565|ENSMUSG00000024182|…	http://amigo.geneontology.org/cgi-bin/amigo/term_details?term=GO:0048598
regulation of transport	Gene Ontology	GO:0051049	150	1578	5.05516e-07	1.9623e-05	ENSMUSG00000030216|ENSMUSG00000050395|ENSMUSG00000027540|ENSMUSG00000023923|ENSMUSG00000057123|ENSMUSG00000059327|ENSMUSG00000029192|ENSMUSG00000031586|ENSMUSG00000028631|ENSMUSG00000028341|ENSMUSG00000037242|ENSMUSG00000025484|ENSMUSG00000024873|ENSMUSG00000023286|ENSMUSG00000003484|ENSMUSG00000026414|ENSMUSG00000028998|ENSMUSG00000020782|ENSMUSG00000030595|ENSMUSG00000029291|ENSMUSG00000026778|…	http://amigo.geneontology.org/cgi-bin/amigo/term_details?term=GO:0051049
extracellular exosome	Gene Ontology	GO:0070062	201	2269	5.57524e-07	2.15461e-05	ENSMUSG00000048583|ENSMUSG00000070427|ENSMUSG00000036707|ENSMUSG00000001687|ENSMUSG00000020263|ENSMUSG00000030218|ENSMUSG00000021712|ENSMUSG00000058624|ENSMUSG00000006333|ENSMUSG00000021266|ENSMUSG00000016528|ENSMUSG00000071072|ENSMUSG00000026491|ENSMUSG00000019278|ENSMUSG00000037242|ENSMUSG00000029203|ENSMUSG00000031785|ENSMUSG00000049313|ENSMUSG00000040006|ENSMUSG00000029413|ENSMUSG00000042510|…	http://amigo.geneontology.org/cgi-bin/amigo/term_details?term=GO:0070062
positive regulation of transferase activity	Gene Ontology	GO:0051347	56	423	5.98632e-07	2.30328e-05	ENSMUSG00000020170|ENSMUSG00000048583|ENSMUSG00000036390|ENSMUSG00000050395|ENSMUSG00000022382|ENSMUSG00000027540|ENSMUSG00000020053|ENSMUSG00000064330|ENSMUSG00000053965|ENSMUSG00000025856|ENSMUSG00000027954|ENSMUSG00000003032|ENSMUSG00000019214|ENSMUSG00000003031|ENSMUSG00000028519|ENSMUSG00000032083|ENSMUSG00000005534|ENSMUSG00000024182|ENSMUSG00000045005|ENSMUSG00000031928|ENSMUSG00000032688|…	http://amigo.geneontology.org/cgi-bin/amigo/term_details?term=GO:0051347
morphogenesis of embryonic epithelium	Gene Ontology	GO:0016331	30	161	7.02263e-07	2.69016e-05	ENSMUSG00000020173|ENSMUSG00000022382|ENSMUSG00000037992|ENSMUSG00000053279|ENSMUSG00000021466|ENSMUSG00000030110|ENSMUSG00000015134|ENSMUSG00000030849|ENSMUSG00000007880|ENSMUSG00000058886|ENSMUSG00000060733|ENSMUSG00000022286|ENSMUSG00000063632|ENSMUSG00000026812|ENSMUSG00000076431|ENSMUSG00000024176|ENSMUSG00000050288|ENSMUSG00000022510|ENSMUSG00000026872|ENSMUSG00000039765|ENSMUSG00000070509|…	http://amigo.geneontology.org/cgi-bin/amigo/term_details?term=GO:0016331
intracellular organelle lumen	Gene Ontology	GO:0070013	233	2725	7.60638e-07	2.90105e-05	ENSMUSG00000030216|ENSMUSG00000026491|ENSMUSG00000024070|ENSMUSG00000055531|ENSMUSG00000020263|ENSMUSG00000039756|ENSMUSG00000003970|ENSMUSG00000031586|ENSMUSG00000016528|ENSMUSG00000057719|ENSMUSG00000041974|ENSMUSG00000017485|ENSMUSG00000037242|ENSMUSG00000058301|ENSMUSG00000049858|ENSMUSG00000033014|ENSMUSG00000030849|ENSMUSG00000049313|ENSMUSG00000004591|ENSMUSG00000042306|ENSMUSG00000054405|…	http://amigo.geneontology.org/cgi-bin/amigo/term_details?term=GO:0070013
extracellular vesicle	Gene Ontology	GO:1903561	201	2281	7.80781e-07	2.96493e-05	ENSMUSG00000048583|ENSMUSG00000070427|ENSMUSG00000036707|ENSMUSG00000001687|ENSMUSG00000020263|ENSMUSG00000030218|ENSMUSG00000021712|ENSMUSG00000058624|ENSMUSG00000006333|ENSMUSG00000021266|ENSMUSG00000016528|ENSMUSG00000071072|ENSMUSG00000026491|ENSMUSG00000019278|ENSMUSG00000037242|ENSMUSG00000029203|ENSMUSG00000031785|ENSMUSG00000049313|ENSMUSG00000040006|ENSMUSG00000029413|ENSMUSG00000042510|…	http://amigo.geneontology.org/cgi-bin/amigo/term_details?term=GO:1903561
negative regulation of cellular metabolic process	Gene Ontology	GO:0031324	171	1875	8.60731e-07	3.23974e-05	ENSMUSG00000020300|ENSMUSG00000027540|ENSMUSG00000059325|ENSMUSG00000025856|ENSMUSG00000020696|ENSMUSG00000028341|ENSMUSG00000057719|ENSMUSG00000019278|ENSMUSG00000058301|ENSMUSG00000040841|ENSMUSG00000030849|ENSMUSG00000049313|ENSMUSG00000058886|ENSMUSG00000017548|ENSMUSG00000004698|ENSMUSG00000019777|ENSMUSG00000024176|ENSMUSG00000015120|ENSMUSG00000063632|ENSMUSG00000029524|ENSMUSG00000026812|…	http://amigo.geneontology.org/cgi-bin/amigo/term_details?term=GO:0031324
organelle lumen	Gene Ontology	GO:0043233	233	2730	8.64277e-07	3.23974e-05	ENSMUSG00000030216|ENSMUSG00000026491|ENSMUSG00000024070|ENSMUSG00000055531|ENSMUSG00000020263|ENSMUSG00000039756|ENSMUSG00000003970|ENSMUSG00000031586|ENSMUSG00000016528|ENSMUSG00000057719|ENSMUSG00000041974|ENSMUSG00000017485|ENSMUSG00000037242|ENSMUSG00000058301|ENSMUSG00000049858|ENSMUSG00000033014|ENSMUSG00000030849|ENSMUSG00000049313|ENSMUSG00000004591|ENSMUSG00000042306|ENSMUSG00000054405|…	http://amigo.geneontology.org/cgi-bin/amigo/term_details?term=GO:0043233
membrane-enclosed lumen	Gene Ontology	GO:0031974	233	2730	8.64277e-07	3.23974e-05	ENSMUSG00000030216|ENSMUSG00000026491|ENSMUSG00000024070|ENSMUSG00000055531|ENSMUSG00000020263|ENSMUSG00000039756|ENSMUSG00000003970|ENSMUSG00000031586|ENSMUSG00000016528|ENSMUSG00000057719|ENSMUSG00000041974|ENSMUSG00000017485|ENSMUSG00000037242|ENSMUSG00000058301|ENSMUSG00000049858|ENSMUSG00000033014|ENSMUSG00000030849|ENSMUSG00000049313|ENSMUSG00000004591|ENSMUSG00000042306|ENSMUSG00000054405|…	http://amigo.geneontology.org/cgi-bin/amigo/term_details?term=GO:0031974
extracellular organelle	Gene Ontology	GO:0043230	201	2285	8.72501e-07	3.25659e-05	ENSMUSG00000048583|ENSMUSG00000070427|ENSMUSG00000036707|ENSMUSG00000001687|ENSMUSG00000020263|ENSMUSG00000030218|ENSMUSG00000021712|ENSMUSG00000058624|ENSMUSG00000006333|ENSMUSG00000021266|ENSMUSG00000016528|ENSMUSG00000071072|ENSMUSG00000026491|ENSMUSG00000019278|ENSMUSG00000037242|ENSMUSG00000029203|ENSMUSG00000031785|ENSMUSG00000049313|ENSMUSG00000040006|ENSMUSG00000029413|ENSMUSG00000042510|…	http://amigo.geneontology.org/cgi-bin/amigo/term_details?term=GO:0043230
mitotic cell cycle	Gene Ontology	GO:0000278	78	682	8.90078e-07	3.30806e-05	ENSMUSG00000048583|ENSMUSG00000002546|ENSMUSG00000026491|ENSMUSG00000030094|ENSMUSG00000024277|ENSMUSG00000034021|ENSMUSG00000004591|ENSMUSG00000048904|ENSMUSG00000057469|ENSMUSG00000005534|ENSMUSG00000034683|ENSMUSG00000022528|ENSMUSG00000038685|ENSMUSG00000031565|ENSMUSG00000030397|ENSMUSG00000031928|ENSMUSG00000078429|ENSMUSG00000030849|ENSMUSG00000024922|ENSMUSG00000032782|ENSMUSG00000028933|…	http://amigo.geneontology.org/cgi-bin/amigo/term_details?term=GO:0000278
positive regulation of gene expression	Gene Ontology	GO:0010628	138	1437	9.01206e-07	3.33523e-05	ENSMUSG00000048583|ENSMUSG00000028023|ENSMUSG00000038256|ENSMUSG00000028341|ENSMUSG00000030110|ENSMUSG00000045005|ENSMUSG00000030849|ENSMUSG00000021134|ENSMUSG00000058886|ENSMUSG00000020115|ENSMUSG00000019777|ENSMUSG00000024176|ENSMUSG00000005583|ENSMUSG00000063632|ENSMUSG00000021103|ENSMUSG00000032826|ENSMUSG00000029727|ENSMUSG00000059146|ENSMUSG00000014303|ENSMUSG00000029335|ENSMUSG00000059327|…	http://amigo.geneontology.org/cgi-bin/amigo/term_details?term=GO:0010628
embryo development	Gene Ontology	GO:0009790	103	988	9.06999e-07	3.3425e-05	ENSMUSG00000062252|ENSMUSG00000021660|ENSMUSG00000059325|ENSMUSG00000028023|ENSMUSG00000025856|ENSMUSG00000028631|ENSMUSG00000028341|ENSMUSG00000030110|ENSMUSG00000045005|ENSMUSG00000030849|ENSMUSG00000028933|ENSMUSG00000028821|ENSMUSG00000019777|ENSMUSG00000024176|ENSMUSG00000005583|ENSMUSG00000063632|ENSMUSG00000026812|ENSMUSG00000053580|ENSMUSG00000060969|ENSMUSG00000036036|ENSMUSG00000076431|…	http://amigo.geneontology.org/cgi-bin/amigo/term_details?term=GO:0009790
single-organism organelle organization	Gene Ontology	GO:1902589	143	1505	9.73626e-07	3.57296e-05	ENSMUSG00000030216|ENSMUSG00000027540|ENSMUSG00000023923|ENSMUSG00000025856|ENSMUSG00000058624|ENSMUSG00000045005|ENSMUSG00000058301|ENSMUSG00000032782|ENSMUSG00000028933|ENSMUSG00000026414|ENSMUSG00000020782|ENSMUSG00000037736|ENSMUSG00000029291|ENSMUSG00000019777|ENSMUSG00000005583|ENSMUSG00000065954|ENSMUSG00000032498|ENSMUSG00000024049|ENSMUSG00000026812|ENSMUSG00000037962|ENSMUSG00000022353|…	http://amigo.geneontology.org/cgi-bin/amigo/term_details?term=GO:1902589
regulation of protein serine/threonine kinase activity	Gene Ontology	GO:0071900	49	355	1.03633e-06	3.78716e-05	ENSMUSG00000020170|ENSMUSG00000020053|ENSMUSG00000036390|ENSMUSG00000050395|ENSMUSG00000022382|ENSMUSG00000027540|ENSMUSG00000064330|ENSMUSG00000053965|ENSMUSG00000025856|ENSMUSG00000027954|ENSMUSG00000003031|ENSMUSG00000005534|ENSMUSG00000003233|ENSMUSG00000045005|ENSMUSG00000024182|ENSMUSG00000024039|ENSMUSG00000032688|ENSMUSG00000036707|ENSMUSG00000031565|ENSMUSG00000027829|ENSMUSG00000004054|…	http://amigo.geneontology.org/cgi-bin/amigo/term_details?term=GO:0071900
positive regulation of transcription, DNA-templated	Gene Ontology	GO:0045893	117	1169	1.05117e-06	3.7973e-05	ENSMUSG00000048583|ENSMUSG00000028023|ENSMUSG00000038256|ENSMUSG00000028341|ENSMUSG00000030110|ENSMUSG00000045005|ENSMUSG00000030849|ENSMUSG00000058886|ENSMUSG00000020115|ENSMUSG00000019777|ENSMUSG00000024176|ENSMUSG00000005583|ENSMUSG00000063632|ENSMUSG00000021103|ENSMUSG00000014303|ENSMUSG00000029335|ENSMUSG00000025326|ENSMUSG00000030057|ENSMUSG00000056770|ENSMUSG00000042750|ENSMUSG00000026017|…	http://amigo.geneontology.org/cgi-bin/amigo/term_details?term=GO:0045893
positive regulation of nucleic acid-templated transcription	Gene Ontology	GO:1903508	117	1169	1.05117e-06	3.7973e-05	ENSMUSG00000048583|ENSMUSG00000028023|ENSMUSG00000038256|ENSMUSG00000028341|ENSMUSG00000030110|ENSMUSG00000045005|ENSMUSG00000030849|ENSMUSG00000058886|ENSMUSG00000020115|ENSMUSG00000019777|ENSMUSG00000024176|ENSMUSG00000005583|ENSMUSG00000063632|ENSMUSG00000021103|ENSMUSG00000014303|ENSMUSG00000029335|ENSMUSG00000025326|ENSMUSG00000030057|ENSMUSG00000056770|ENSMUSG00000042750|ENSMUSG00000026017|…	http://amigo.geneontology.org/cgi-bin/amigo/term_details?term=GO:1903508
positive regulation of macromolecule biosynthetic process	Gene Ontology	GO:0010557	133	1376	1.05215e-06	3.7973e-05	ENSMUSG00000048583|ENSMUSG00000028023|ENSMUSG00000038256|ENSMUSG00000016528|ENSMUSG00000030110|ENSMUSG00000045005|ENSMUSG00000030849|ENSMUSG00000058886|ENSMUSG00000020115|ENSMUSG00000019777|ENSMUSG00000024176|ENSMUSG00000005583|ENSMUSG00000063632|ENSMUSG00000021103|ENSMUSG00000014303|ENSMUSG00000029335|ENSMUSG00000025856|ENSMUSG00000025326|ENSMUSG00000030057|ENSMUSG00000056770|ENSMUSG00000002546|…	http://amigo.geneontology.org/cgi-bin/amigo/term_details?term=GO:0010557
regulation of apoptotic process	Gene Ontology	GO:0042981	122	1234	1.08142e-06	3.88689e-05	ENSMUSG00000020300|ENSMUSG00000050395|ENSMUSG00000027540|ENSMUSG00000020696|ENSMUSG00000028341|ENSMUSG00000029207|ENSMUSG00000019278|ENSMUSG00000030562|ENSMUSG00000030849|ENSMUSG00000028933|ENSMUSG00000039959|ENSMUSG00000030847|ENSMUSG00000004054|ENSMUSG00000026234|ENSMUSG00000019777|ENSMUSG00000024176|ENSMUSG00000005583|ENSMUSG00000021103|ENSMUSG00000063142|ENSMUSG00000029524|ENSMUSG00000054808|…	http://amigo.geneontology.org/cgi-bin/amigo/term_details?term=GO:0042981
muscle structure development	Gene Ontology	GO:0061061	66	546	1.13932e-06	4.07819e-05	ENSMUSG00000048583|ENSMUSG00000020053|ENSMUSG00000029417|ENSMUSG00000004383|ENSMUSG00000022382|ENSMUSG00000037992|ENSMUSG00000059325|ENSMUSG00000002052|ENSMUSG00000038256|ENSMUSG00000045098|ENSMUSG00000089989|ENSMUSG00000020911|ENSMUSG00000045680|ENSMUSG00000041975|ENSMUSG00000022528|ENSMUSG00000030739|ENSMUSG00000031565|ENSMUSG00000027833|ENSMUSG00000030849|ENSMUSG00000028639|ENSMUSG00000007880|…	http://amigo.geneontology.org/cgi-bin/amigo/term_details?term=GO:0061061
positive regulation of RNA biosynthetic process	Gene Ontology	GO:1902680	117	1172	1.17886e-06	4.20252e-05	ENSMUSG00000048583|ENSMUSG00000028023|ENSMUSG00000038256|ENSMUSG00000028341|ENSMUSG00000030110|ENSMUSG00000045005|ENSMUSG00000030849|ENSMUSG00000058886|ENSMUSG00000020115|ENSMUSG00000019777|ENSMUSG00000024176|ENSMUSG00000005583|ENSMUSG00000063632|ENSMUSG00000021103|ENSMUSG00000014303|ENSMUSG00000029335|ENSMUSG00000025326|ENSMUSG00000030057|ENSMUSG00000056770|ENSMUSG00000042750|ENSMUSG00000026017|…	http://amigo.geneontology.org/cgi-bin/amigo/term_details?term=GO:1902680
positive regulation of transcription from RNA polymerase II promoter	Gene Ontology	GO:0045944	97	921	1.26836e-06	4.5032e-05	ENSMUSG00000048583|ENSMUSG00000028023|ENSMUSG00000038256|ENSMUSG00000028341|ENSMUSG00000021264|ENSMUSG00000045005|ENSMUSG00000030849|ENSMUSG00000020115|ENSMUSG00000070509|ENSMUSG00000024176|ENSMUSG00000005583|ENSMUSG00000063632|ENSMUSG00000021103|ENSMUSG00000014303|ENSMUSG00000029335|ENSMUSG00000025326|ENSMUSG00000030057|ENSMUSG00000056770|ENSMUSG00000042750|ENSMUSG00000026017|ENSMUSG00000025498|…	http://amigo.geneontology.org/cgi-bin/amigo/term_details?term=GO:0045944
ribonucleotide binding	Gene Ontology	GO:0032553	150	1606	1.27907e-06	4.52285e-05	ENSMUSG00000024070|ENSMUSG00000034936|ENSMUSG00000049892|ENSMUSG00000021712|ENSMUSG00000024878|ENSMUSG00000016528|ENSMUSG00000030110|ENSMUSG00000058301|ENSMUSG00000029203|ENSMUSG00000023286|ENSMUSG00000033335|ENSMUSG00000030849|ENSMUSG00000028933|ENSMUSG00000022176|ENSMUSG00000004591|ENSMUSG00000020385|ENSMUSG00000030249|ENSMUSG00000020115|ENSMUSG00000070056|ENSMUSG00000015120|ENSMUSG00000052539|…	http://amigo.geneontology.org/cgi-bin/amigo/term_details?term=GO:0032553
regulation of MAP kinase activity	Gene Ontology	GO:0043405	38	244	1.33754e-06	4.7105e-05	ENSMUSG00000020170|ENSMUSG00000020053|ENSMUSG00000036390|ENSMUSG00000049313|ENSMUSG00000022382|ENSMUSG00000027540|ENSMUSG00000064330|ENSMUSG00000053965|ENSMUSG00000025856|ENSMUSG00000027954|ENSMUSG00000005534|ENSMUSG00000024182|ENSMUSG00000045005|ENSMUSG00000024039|ENSMUSG00000024427|ENSMUSG00000031565|ENSMUSG00000004054|ENSMUSG00000032501|ENSMUSG00000002985|ENSMUSG00000030562|ENSMUSG00000020227|…	http://amigo.geneontology.org/cgi-bin/amigo/term_details?term=GO:0043405
actin filament-based process	Gene Ontology	GO:0030029	66	550	1.4285e-06	4.99505e-05	ENSMUSG00000033444|ENSMUSG00000029415|ENSMUSG00000021699|ENSMUSG00000020173|ENSMUSG00000019359|ENSMUSG00000040260|ENSMUSG00000021338|ENSMUSG00000027540|ENSMUSG00000063450|ENSMUSG00000031548|ENSMUSG00000030562|ENSMUSG00000025856|ENSMUSG00000057123|ENSMUSG00000059146|ENSMUSG00000054808|ENSMUSG00000032083|ENSMUSG00000029207|ENSMUSG00000036053|ENSMUSG00000016382|ENSMUSG00000049493|ENSMUSG00000029621|…	http://amigo.geneontology.org/cgi-bin/amigo/term_details?term=GO:0030029
cellular localization	Gene Ontology	GO:0051641	173	1919	1.42977e-06	4.99505e-05	ENSMUSG00000030216|ENSMUSG00000027540|ENSMUSG00000023923|ENSMUSG00000059327|ENSMUSG00000029192|ENSMUSG00000031586|ENSMUSG00000020696|ENSMUSG00000028341|ENSMUSG00000041974|ENSMUSG00000045005|ENSMUSG00000024873|ENSMUSG00000026074|ENSMUSG00000023286|ENSMUSG00000030849|ENSMUSG00000026414|ENSMUSG00000028998|ENSMUSG00000020782|ENSMUSG00000066232|ENSMUSG00000030595|ENSMUSG00000029291|ENSMUSG00000025266|…	http://amigo.geneontology.org/cgi-bin/amigo/term_details?term=GO:0051641
positive regulation of RNA metabolic process	Gene Ontology	GO:0051254	120	1218	1.55565e-06	5.41318e-05	ENSMUSG00000048583|ENSMUSG00000028023|ENSMUSG00000038256|ENSMUSG00000028341|ENSMUSG00000030110|ENSMUSG00000045005|ENSMUSG00000058301|ENSMUSG00000030849|ENSMUSG00000021134|ENSMUSG00000058886|ENSMUSG00000020115|ENSMUSG00000019777|ENSMUSG00000024176|ENSMUSG00000005583|ENSMUSG00000063632|ENSMUSG00000021103|ENSMUSG00000014303|ENSMUSG00000029335|ENSMUSG00000025326|ENSMUSG00000030057|ENSMUSG00000056770|…	http://amigo.geneontology.org/cgi-bin/amigo/term_details?term=GO:0051254
response to lipid	Gene Ontology	GO:0033993	66	552	1.59769e-06	5.53738e-05	ENSMUSG00000020027|ENSMUSG00000026826|ENSMUSG00000029417|ENSMUSG00000016528|ENSMUSG00000022383|ENSMUSG00000071072|ENSMUSG00000037992|ENSMUSG00000019970|ENSMUSG00000045680|ENSMUSG00000029304|ENSMUSG00000023964|ENSMUSG00000021466|ENSMUSG00000056501|ENSMUSG00000028341|ENSMUSG00000030110|ENSMUSG00000031443|ENSMUSG00000020053|ENSMUSG00000058301|ENSMUSG00000031207|ENSMUSG00000007880|ENSMUSG00000034610|…	http://amigo.geneontology.org/cgi-bin/amigo/term_details?term=GO:0033993
purine nucleotide binding	Gene Ontology	GO:0017076	149	1600	1.61971e-06	5.59152e-05	ENSMUSG00000024070|ENSMUSG00000034936|ENSMUSG00000049892|ENSMUSG00000021712|ENSMUSG00000024878|ENSMUSG00000016528|ENSMUSG00000030110|ENSMUSG00000058301|ENSMUSG00000029203|ENSMUSG00000023286|ENSMUSG00000033335|ENSMUSG00000030849|ENSMUSG00000028933|ENSMUSG00000030847|ENSMUSG00000022176|ENSMUSG00000004591|ENSMUSG00000020385|ENSMUSG00000030249|ENSMUSG00000020115|ENSMUSG00000070056|ENSMUSG00000015120|…	http://amigo.geneontology.org/cgi-bin/amigo/term_details?term=GO:0017076
cellular component biogenesis	Gene Ontology	GO:0044085	191	2171	1.68532e-06	5.7951e-05	ENSMUSG00000053198|ENSMUSG00000030216|ENSMUSG00000026491|ENSMUSG00000055003|ENSMUSG00000030218|ENSMUSG00000025856|ENSMUSG00000029192|ENSMUSG00000022565|ENSMUSG00000041974|ENSMUSG00000045005|ENSMUSG00000029203|ENSMUSG00000033335|ENSMUSG00000004814|ENSMUSG00000032782|ENSMUSG00000028933|ENSMUSG00000026414|ENSMUSG00000032405|ENSMUSG00000055531|ENSMUSG00000039450|ENSMUSG00000025504|ENSMUSG00000032336|…	http://amigo.geneontology.org/cgi-bin/amigo/term_details?term=GO:0044085
regulation of programmed cell death	Gene Ontology	GO:0043067	122	1248	1.8085e-06	6.1943e-05	ENSMUSG00000020300|ENSMUSG00000050395|ENSMUSG00000027540|ENSMUSG00000020696|ENSMUSG00000028341|ENSMUSG00000029207|ENSMUSG00000019278|ENSMUSG00000030562|ENSMUSG00000030849|ENSMUSG00000028933|ENSMUSG00000039959|ENSMUSG00000030847|ENSMUSG00000004054|ENSMUSG00000026234|ENSMUSG00000019777|ENSMUSG00000024176|ENSMUSG00000005583|ENSMUSG00000021103|ENSMUSG00000063142|ENSMUSG00000029524|ENSMUSG00000054808|…	http://amigo.geneontology.org/cgi-bin/amigo/term_details?term=GO:0043067
protein transport	Gene Ontology	GO:0015031	140	1486	1.94195e-06	6.6254e-05	ENSMUSG00000030216|ENSMUSG00000026491|ENSMUSG00000050395|ENSMUSG00000021660|ENSMUSG00000027540|ENSMUSG00000023923|ENSMUSG00000057123|ENSMUSG00000059327|ENSMUSG00000029192|ENSMUSG00000031586|ENSMUSG00000020696|ENSMUSG00000060090|ENSMUSG00000020454|ENSMUSG00000045005|ENSMUSG00000025484|ENSMUSG00000023286|ENSMUSG00000033335|ENSMUSG00000028998|ENSMUSG00000018672|ENSMUSG00000066232|ENSMUSG00000030595|…	http://amigo.geneontology.org/cgi-bin/amigo/term_details?term=GO:0015031
organic substance transport	Gene Ontology	GO:0071702	186	2108	1.97892e-06	6.71972e-05	ENSMUSG00000030216|ENSMUSG00000026491|ENSMUSG00000050395|ENSMUSG00000021660|ENSMUSG00000027540|ENSMUSG00000020261|ENSMUSG00000057123|ENSMUSG00000059327|ENSMUSG00000029192|ENSMUSG00000031586|ENSMUSG00000020696|ENSMUSG00000046027|ENSMUSG00000021265|ENSMUSG00000020454|ENSMUSG00000045005|ENSMUSG00000025484|ENSMUSG00000026074|ENSMUSG00000023286|ENSMUSG00000003484|ENSMUSG00000028998|ENSMUSG00000018672|…	http://amigo.geneontology.org/cgi-bin/amigo/term_details?term=GO:0071702
developmental growth	Gene Ontology	GO:0048589	69	591	1.98499e-06	6.71972e-05	ENSMUSG00000048583|ENSMUSG00000020027|ENSMUSG00000020173|ENSMUSG00000070509|ENSMUSG00000021466|ENSMUSG00000022382|ENSMUSG00000037992|ENSMUSG00000020053|ENSMUSG00000031603|ENSMUSG00000059325|ENSMUSG00000038256|ENSMUSG00000043051|ENSMUSG00000033174|ENSMUSG00000025326|ENSMUSG00000021699|ENSMUSG00000005534|ENSMUSG00000045414|ENSMUSG00000031302|ENSMUSG00000031565|ENSMUSG00000055737|ENSMUSG00000049493|…	http://amigo.geneontology.org/cgi-bin/amigo/term_details?term=GO:0048589
anatomical structure formation involved in morphogenesis	Gene Ontology	GO:0048646	109	1085	2.12532e-06	7.16699e-05	ENSMUSG00000053198|ENSMUSG00000059325|ENSMUSG00000028023|ENSMUSG00000025856|ENSMUSG00000021266|ENSMUSG00000028341|ENSMUSG00000030110|ENSMUSG00000037242|ENSMUSG00000030849|ENSMUSG00000029669|ENSMUSG00000028933|ENSMUSG00000026414|ENSMUSG00000004698|ENSMUSG00000004814|ENSMUSG00000024176|ENSMUSG00000005583|ENSMUSG00000063632|ENSMUSG00000058886|ENSMUSG00000026812|ENSMUSG00000030470|ENSMUSG00000059327|…	http://amigo.geneontology.org/cgi-bin/amigo/term_details?term=GO:0048646
receptor binding	Gene Ontology	GO:0005102	124	1279	2.16409e-06	7.26969e-05	ENSMUSG00000048583|ENSMUSG00000070427|ENSMUSG00000050395|ENSMUSG00000027540|ENSMUSG00000006575|ENSMUSG00000025856|ENSMUSG00000028341|ENSMUSG00000056978|ENSMUSG00000033335|ENSMUSG00000031302|ENSMUSG00000025006|ENSMUSG00000004814|ENSMUSG00000052539|ENSMUSG00000042826|ENSMUSG00000027947|ENSMUSG00000022791|ENSMUSG00000029335|ENSMUSG00000059327|ENSMUSG00000029337|ENSMUSG00000063428|ENSMUSG00000022656|…	http://amigo.geneontology.org/cgi-bin/amigo/term_details?term=GO:0005102
nucleoside binding	Gene Ontology	GO:0001882	146	1573	2.45538e-06	8.21658e-05	ENSMUSG00000024070|ENSMUSG00000034936|ENSMUSG00000049892|ENSMUSG00000021712|ENSMUSG00000024878|ENSMUSG00000016528|ENSMUSG00000030110|ENSMUSG00000058301|ENSMUSG00000029203|ENSMUSG00000023286|ENSMUSG00000033335|ENSMUSG00000030849|ENSMUSG00000028933|ENSMUSG00000022176|ENSMUSG00000004591|ENSMUSG00000020385|ENSMUSG00000030249|ENSMUSG00000020115|ENSMUSG00000070056|ENSMUSG00000015120|ENSMUSG00000052539|…	http://amigo.geneontology.org/cgi-bin/amigo/term_details?term=GO:0001882
locomotion	Gene Ontology	GO:0040011	127	1323	2.56226e-06	8.54151e-05	ENSMUSG00000028023|ENSMUSG00000025856|ENSMUSG00000033152|ENSMUSG00000020696|ENSMUSG00000036144|ENSMUSG00000028341|ENSMUSG00000030110|ENSMUSG00000029207|ENSMUSG00000019278|ENSMUSG00000037242|ENSMUSG00000004591|ENSMUSG00000066235|ENSMUSG00000029291|ENSMUSG00000004814|ENSMUSG00000024176|ENSMUSG00000005583|ENSMUSG00000054808|ENSMUSG00000059146|ENSMUSG00000022791|ENSMUSG00000039936|ENSMUSG00000037251|…	http://amigo.geneontology.org/cgi-bin/amigo/term_details?term=GO:0040011
cytoskeletal protein binding	Gene Ontology	GO:0008092	81	740	2.59571e-06	8.62012e-05	ENSMUSG00000026825|ENSMUSG00000070385|ENSMUSG00000006304|ENSMUSG00000040260|ENSMUSG00000063077|ENSMUSG00000037992|ENSMUSG00000019970|ENSMUSG00000063450|ENSMUSG00000021573|ENSMUSG00000033420|ENSMUSG00000043051|ENSMUSG00000020173|ENSMUSG00000028572|ENSMUSG00000031207|ENSMUSG00000022565|ENSMUSG00000030340|ENSMUSG00000052374|ENSMUSG00000016382|ENSMUSG00000030397|ENSMUSG00000049493|ENSMUSG00000034595|…	http://amigo.geneontology.org/cgi-bin/amigo/term_details?term=GO:0008092
immune system process	Gene Ontology	GO:0002376	164	1818	2.66987e-06	8.83281e-05	ENSMUSG00000048583|ENSMUSG00000070427|ENSMUSG00000050395|ENSMUSG00000028023|ENSMUSG00000059327|ENSMUSG00000033152|ENSMUSG00000034165|ENSMUSG00000028341|ENSMUSG00000030110|ENSMUSG00000026491|ENSMUSG00000045005|ENSMUSG00000029203|ENSMUSG00000026180|ENSMUSG00000030849|ENSMUSG00000028776|ENSMUSG00000023367|ENSMUSG00000066232|ENSMUSG00000004698|ENSMUSG00000004814|ENSMUSG00000005583|ENSMUSG00000063632|…	http://amigo.geneontology.org/cgi-bin/amigo/term_details?term=GO:0002376
establishment of protein localization	Gene Ontology	GO:0045184	150	1630	2.73949e-06	9.02895e-05	ENSMUSG00000030216|ENSMUSG00000026491|ENSMUSG00000050395|ENSMUSG00000021660|ENSMUSG00000027540|ENSMUSG00000023923|ENSMUSG00000057123|ENSMUSG00000059327|ENSMUSG00000029192|ENSMUSG00000031586|ENSMUSG00000020696|ENSMUSG00000041974|ENSMUSG00000020454|ENSMUSG00000045005|ENSMUSG00000025484|ENSMUSG00000023286|ENSMUSG00000033335|ENSMUSG00000028998|ENSMUSG00000018672|ENSMUSG00000020782|ENSMUSG00000066232|…	http://amigo.geneontology.org/cgi-bin/amigo/term_details?term=GO:0045184
purine ribonucleotide binding	Gene Ontology	GO:0032555	147	1591	2.84293e-06	9.33463e-05	ENSMUSG00000024070|ENSMUSG00000034936|ENSMUSG00000049892|ENSMUSG00000021712|ENSMUSG00000024878|ENSMUSG00000016528|ENSMUSG00000030110|ENSMUSG00000058301|ENSMUSG00000029203|ENSMUSG00000023286|ENSMUSG00000033335|ENSMUSG00000030849|ENSMUSG00000028933|ENSMUSG00000022176|ENSMUSG00000004591|ENSMUSG00000020385|ENSMUSG00000030249|ENSMUSG00000020115|ENSMUSG00000070056|ENSMUSG00000015120|ENSMUSG00000052539|…	http://amigo.geneontology.org/cgi-bin/amigo/term_details?term=GO:0032555
urogenital system development	Gene Ontology	GO:0001655	42	295	2.9983e-06	9.78759e-05	ENSMUSG00000020170|ENSMUSG00000021125|ENSMUSG00000021466|ENSMUSG00000022382|ENSMUSG00000037992|ENSMUSG00000045680|ENSMUSG00000025856|ENSMUSG00000003031|ENSMUSG00000030110|ENSMUSG00000022528|ENSMUSG00000031565|ENSMUSG00000004207|ENSMUSG00000030849|ENSMUSG00000024922|ENSMUSG00000032327|ENSMUSG00000001642|ENSMUSG00000031681|ENSMUSG00000062563|ENSMUSG00000000753|ENSMUSG00000024176|ENSMUSG00000005583|…	http://amigo.geneontology.org/cgi-bin/amigo/term_details?term=GO:0001655
purine nucleoside binding	Gene Ontology	GO:0001883	145	1566	3.00329e-06	9.78759e-05	ENSMUSG00000024070|ENSMUSG00000034936|ENSMUSG00000049892|ENSMUSG00000021712|ENSMUSG00000024878|ENSMUSG00000016528|ENSMUSG00000030110|ENSMUSG00000058301|ENSMUSG00000029203|ENSMUSG00000023286|ENSMUSG00000033335|ENSMUSG00000030849|ENSMUSG00000028933|ENSMUSG00000022176|ENSMUSG00000004591|ENSMUSG00000020385|ENSMUSG00000030249|ENSMUSG00000020115|ENSMUSG00000070056|ENSMUSG00000015120|ENSMUSG00000052539|…	http://amigo.geneontology.org/cgi-bin/amigo/term_details?term=GO:0001883
purine ribonucleoside triphosphate binding	Gene Ontology	GO:0035639	144	1554	3.13514e-06	0.000101793	ENSMUSG00000024070|ENSMUSG00000034936|ENSMUSG00000049892|ENSMUSG00000021712|ENSMUSG00000024878|ENSMUSG00000016528|ENSMUSG00000030110|ENSMUSG00000058301|ENSMUSG00000029203|ENSMUSG00000023286|ENSMUSG00000033335|ENSMUSG00000030849|ENSMUSG00000028933|ENSMUSG00000022176|ENSMUSG00000004591|ENSMUSG00000020385|ENSMUSG00000030249|ENSMUSG00000020115|ENSMUSG00000070056|ENSMUSG00000015120|ENSMUSG00000052539|…	http://amigo.geneontology.org/cgi-bin/amigo/term_details?term=GO:0035639
kinase binding	Gene Ontology	GO:0019900	69	601	3.35164e-06	0.000108419	ENSMUSG00000020170|ENSMUSG00000026825|ENSMUSG00000034165|ENSMUSG00000029410|ENSMUSG00000037992|ENSMUSG00000003123|ENSMUSG00000019254|ENSMUSG00000029192|ENSMUSG00000089989|ENSMUSG00000020696|ENSMUSG00000056501|ENSMUSG00000028341|ENSMUSG00000005534|ENSMUSG00000022528|ENSMUSG00000015837|ENSMUSG00000000881|ENSMUSG00000045005|ENSMUSG00000003153|ENSMUSG00000028645|ENSMUSG00000018411|ENSMUSG00000020524|…	http://amigo.geneontology.org/cgi-bin/amigo/term_details?term=GO:0019900
actin cytoskeleton	Gene Ontology	GO:0015629	49	372	3.37036e-06	0.000108622	ENSMUSG00000033444|ENSMUSG00000071072|ENSMUSG00000025791|ENSMUSG00000020173|ENSMUSG00000019359|ENSMUSG00000032489|ENSMUSG00000021338|ENSMUSG00000037992|ENSMUSG00000030562|ENSMUSG00000034868|ENSMUSG00000052374|ENSMUSG00000016382|ENSMUSG00000028645|ENSMUSG00000049493|ENSMUSG00000029621|ENSMUSG00000026288|ENSMUSG00000026414|ENSMUSG00000020911|ENSMUSG00000028176|ENSMUSG00000020782|ENSMUSG00000061723|…	http://amigo.geneontology.org/cgi-bin/amigo/term_details?term=GO:0015629
sensory organ development	Gene Ontology	GO:0007423	59	485	3.48799e-06	0.000112	ENSMUSG00000020170|ENSMUSG00000062252|ENSMUSG00000036923|ENSMUSG00000016528|ENSMUSG00000037992|ENSMUSG00000021264|ENSMUSG00000053279|ENSMUSG00000028023|ENSMUSG00000003032|ENSMUSG00000022982|ENSMUSG00000048904|ENSMUSG00000028341|ENSMUSG00000038402|ENSMUSG00000022528|ENSMUSG00000024182|ENSMUSG00000031565|ENSMUSG00000022656|ENSMUSG00000037016|ENSMUSG00000030849|ENSMUSG00000029669|ENSMUSG00000007880|…	http://amigo.geneontology.org/cgi-bin/amigo/term_details?term=GO:0007423
regulation of kinase activity	Gene Ontology	GO:0043549	68	591	3.6867e-06	0.000117947	ENSMUSG00000020170|ENSMUSG00000020027|ENSMUSG00000036390|ENSMUSG00000050395|ENSMUSG00000022382|ENSMUSG00000027540|ENSMUSG00000020053|ENSMUSG00000064330|ENSMUSG00000053965|ENSMUSG00000025856|ENSMUSG00000027954|ENSMUSG00000003031|ENSMUSG00000028519|ENSMUSG00000034683|ENSMUSG00000005534|ENSMUSG00000003233|ENSMUSG00000031565|ENSMUSG00000024182|ENSMUSG00000031928|ENSMUSG00000037025|ENSMUSG00000032688|…	http://amigo.geneontology.org/cgi-bin/amigo/term_details?term=GO:0043549
negative regulation of signal transduction	Gene Ontology	GO:0009968	95	922	3.78008e-06	0.000120493	ENSMUSG00000027540|ENSMUSG00000020696|ENSMUSG00000033014|ENSMUSG00000033335|ENSMUSG00000017548|ENSMUSG00000030595|ENSMUSG00000040451|ENSMUSG00000020893|ENSMUSG00000026812|ENSMUSG00000014303|ENSMUSG00000075701|ENSMUSG00000038332|ENSMUSG00000061288|ENSMUSG00000019768|ENSMUSG00000020108|ENSMUSG00000030170|ENSMUSG00000026826|ENSMUSG00000022382|ENSMUSG00000009291|ENSMUSG00000032083|ENSMUSG00000028639|…	http://amigo.geneontology.org/cgi-bin/amigo/term_details?term=GO:0009968
perinuclear region of cytoplasm	Gene Ontology	GO:0048471	60	498	3.79783e-06	0.000120619	ENSMUSG00000033335|ENSMUSG00000020173|ENSMUSG00000049313|ENSMUSG00000071072|ENSMUSG00000037992|ENSMUSG00000019970|ENSMUSG00000031207|ENSMUSG00000049892|ENSMUSG00000030562|ENSMUSG00000043051|ENSMUSG00000029304|ENSMUSG00000018566|ENSMUSG00000054808|ENSMUSG00000028519|ENSMUSG00000022565|ENSMUSG00000029822|ENSMUSG00000037242|ENSMUSG00000031928|ENSMUSG00000025162|ENSMUSG00000022553|ENSMUSG00000028639|…	http://amigo.geneontology.org/cgi-bin/amigo/term_details?term=GO:0048471
negative regulation of biosynthetic process	Gene Ontology	GO:0009890	116	1192	3.97389e-06	0.000125753	ENSMUSG00000020300|ENSMUSG00000059325|ENSMUSG00000025856|ENSMUSG00000028341|ENSMUSG00000021264|ENSMUSG00000020454|ENSMUSG00000058301|ENSMUSG00000030849|ENSMUSG00000017548|ENSMUSG00000004698|ENSMUSG00000019777|ENSMUSG00000024176|ENSMUSG00000015120|ENSMUSG00000020893|ENSMUSG00000026812|ENSMUSG00000049892|ENSMUSG00000024042|ENSMUSG00000060032|ENSMUSG00000014303|ENSMUSG00000075701|ENSMUSG00000040407|…	http://amigo.geneontology.org/cgi-bin/amigo/term_details?term=GO:0009890
regulation of establishment of protein localization	Gene Ontology	GO:0070201	78	713	4.04709e-06	0.000127607	ENSMUSG00000061878|ENSMUSG00000020053|ENSMUSG00000059208|ENSMUSG00000050395|ENSMUSG00000027540|ENSMUSG00000035621|ENSMUSG00000057123|ENSMUSG00000030216|ENSMUSG00000031488|ENSMUSG00000026778|ENSMUSG00000031586|ENSMUSG00000014776|ENSMUSG00000032083|ENSMUSG00000022528|ENSMUSG00000015568|ENSMUSG00000020848|ENSMUSG00000027803|ENSMUSG00000033685|ENSMUSG00000049493|ENSMUSG00000023349|ENSMUSG00000022200|…	http://amigo.geneontology.org/cgi-bin/amigo/term_details?term=GO:0070201
regulatory region nucleic acid binding	Gene Ontology	GO:0001067	77	701	4.0771e-06	0.000128091	ENSMUSG00000001419|ENSMUSG00000026826|ENSMUSG00000036390|ENSMUSG00000022383|ENSMUSG00000014303|ENSMUSG00000037992|ENSMUSG00000045680|ENSMUSG00000028023|ENSMUSG00000031681|ENSMUSG00000022895|ENSMUSG00000048904|ENSMUSG00000036144|ENSMUSG00000028341|ENSMUSG00000038402|ENSMUSG00000022528|ENSMUSG00000037025|ENSMUSG00000047407|ENSMUSG00000043456|ENSMUSG00000024513|ENSMUSG00000022553|ENSMUSG00000024922|…	http://amigo.geneontology.org/cgi-bin/amigo/term_details?term=GO:0001067
regulation of cellular component biogenesis	Gene Ontology	GO:0044087	74	665	4.1364e-06	0.000129489	ENSMUSG00000020173|ENSMUSG00000032812|ENSMUSG00000006304|ENSMUSG00000055003|ENSMUSG00000021573|ENSMUSG00000030562|ENSMUSG00000058624|ENSMUSG00000050511|ENSMUSG00000026812|ENSMUSG00000028782|ENSMUSG00000031207|ENSMUSG00000032083|ENSMUSG00000041974|ENSMUSG00000031302|ENSMUSG00000045005|ENSMUSG00000064272|ENSMUSG00000018411|ENSMUSG00000029621|ENSMUSG00000033335|ENSMUSG00000004814|ENSMUSG00000026234|…	http://amigo.geneontology.org/cgi-bin/amigo/term_details?term=GO:0044087
purine ribonucleoside binding	Gene Ontology	GO:0032550	144	1563	4.15887e-06	0.000129727	ENSMUSG00000024070|ENSMUSG00000034936|ENSMUSG00000049892|ENSMUSG00000021712|ENSMUSG00000024878|ENSMUSG00000016528|ENSMUSG00000030110|ENSMUSG00000058301|ENSMUSG00000029203|ENSMUSG00000023286|ENSMUSG00000033335|ENSMUSG00000030849|ENSMUSG00000028933|ENSMUSG00000022176|ENSMUSG00000004591|ENSMUSG00000020385|ENSMUSG00000030249|ENSMUSG00000020115|ENSMUSG00000070056|ENSMUSG00000015120|ENSMUSG00000052539|…	http://amigo.geneontology.org/cgi-bin/amigo/term_details?term=GO:0032550
ribonucleoside binding	Gene Ontology	GO:0032549	144	1566	4.5651e-06	0.000141892	ENSMUSG00000024070|ENSMUSG00000034936|ENSMUSG00000049892|ENSMUSG00000021712|ENSMUSG00000024878|ENSMUSG00000016528|ENSMUSG00000030110|ENSMUSG00000058301|ENSMUSG00000029203|ENSMUSG00000023286|ENSMUSG00000033335|ENSMUSG00000030849|ENSMUSG00000028933|ENSMUSG00000022176|ENSMUSG00000004591|ENSMUSG00000020385|ENSMUSG00000030249|ENSMUSG00000020115|ENSMUSG00000070056|ENSMUSG00000015120|ENSMUSG00000052539|…	http://amigo.geneontology.org/cgi-bin/amigo/term_details?term=GO:0032549
tube morphogenesis	Gene Ontology	GO:0035239	48	366	4.69776e-06	0.000145497	ENSMUSG00000020173|ENSMUSG00000022382|ENSMUSG00000037992|ENSMUSG00000045680|ENSMUSG00000030218|ENSMUSG00000028023|ENSMUSG00000059327|ENSMUSG00000021466|ENSMUSG00000028341|ENSMUSG00000030110|ENSMUSG00000022528|ENSMUSG00000037025|ENSMUSG00000037242|ENSMUSG00000027833|ENSMUSG00000047407|ENSMUSG00000040728|ENSMUSG00000030849|ENSMUSG00000007880|ENSMUSG00000058886|ENSMUSG00000060733|ENSMUSG00000032359|…	http://amigo.geneontology.org/cgi-bin/amigo/term_details?term=GO:0035239
embryonic organ development	Gene Ontology	GO:0048568	53	422	4.77516e-06	0.000147372	ENSMUSG00000020170|ENSMUSG00000062252|ENSMUSG00000057123|ENSMUSG00000020173|ENSMUSG00000022382|ENSMUSG00000037992|ENSMUSG00000045680|ENSMUSG00000053279|ENSMUSG00000028023|ENSMUSG00000025856|ENSMUSG00000027954|ENSMUSG00000089989|ENSMUSG00000020911|ENSMUSG00000048904|ENSMUSG00000056501|ENSMUSG00000028341|ENSMUSG00000038402|ENSMUSG00000022528|ENSMUSG00000024182|ENSMUSG00000031565|ENSMUSG00000028631|…	http://amigo.geneontology.org/cgi-bin/amigo/term_details?term=GO:0048568
protein complex binding	Gene Ontology	GO:0032403	80	742	4.99018e-06	0.000153466	ENSMUSG00000048583|ENSMUSG00000020170|ENSMUSG00000036295|ENSMUSG00000022383|ENSMUSG00000021248|ENSMUSG00000027540|ENSMUSG00000023923|ENSMUSG00000063450|ENSMUSG00000025856|ENSMUSG00000038013|ENSMUSG00000037242|ENSMUSG00000003031|ENSMUSG00000042279|ENSMUSG00000005534|ENSMUSG00000070904|ENSMUSG00000022528|ENSMUSG00000031565|ENSMUSG00000031785|ENSMUSG00000049493|ENSMUSG00000029621|ENSMUSG00000030554|…	http://amigo.geneontology.org/cgi-bin/amigo/term_details?term=GO:0032403
actin cytoskeleton organization	Gene Ontology	GO:0030036	59	492	5.19439e-06	0.000159185	ENSMUSG00000033444|ENSMUSG00000029415|ENSMUSG00000020173|ENSMUSG00000019359|ENSMUSG00000040260|ENSMUSG00000021338|ENSMUSG00000027540|ENSMUSG00000031548|ENSMUSG00000030562|ENSMUSG00000025856|ENSMUSG00000059146|ENSMUSG00000054808|ENSMUSG00000032083|ENSMUSG00000036053|ENSMUSG00000016382|ENSMUSG00000049493|ENSMUSG00000029621|ENSMUSG00000032812|ENSMUSG00000038013|ENSMUSG00000026414|ENSMUSG00000020911|…	http://amigo.geneontology.org/cgi-bin/amigo/term_details?term=GO:0030036
negative regulation of cellular macromolecule biosynthetic process	Gene Ontology	GO:2000113	106	1071	5.37314e-06	0.000164087	ENSMUSG00000020300|ENSMUSG00000059325|ENSMUSG00000028341|ENSMUSG00000021264|ENSMUSG00000020454|ENSMUSG00000058301|ENSMUSG00000030849|ENSMUSG00000017548|ENSMUSG00000004698|ENSMUSG00000019777|ENSMUSG00000024176|ENSMUSG00000015120|ENSMUSG00000020893|ENSMUSG00000026812|ENSMUSG00000049892|ENSMUSG00000024042|ENSMUSG00000060032|ENSMUSG00000014303|ENSMUSG00000036036|ENSMUSG00000019768|ENSMUSG00000026826|…	http://amigo.geneontology.org/cgi-bin/amigo/term_details?term=GO:2000113
negative regulation of cellular biosynthetic process	Gene Ontology	GO:0031327	113	1162	5.47489e-06	0.000166458	ENSMUSG00000020300|ENSMUSG00000059325|ENSMUSG00000025856|ENSMUSG00000028341|ENSMUSG00000021264|ENSMUSG00000020454|ENSMUSG00000058301|ENSMUSG00000030849|ENSMUSG00000017548|ENSMUSG00000004698|ENSMUSG00000019777|ENSMUSG00000024176|ENSMUSG00000015120|ENSMUSG00000020893|ENSMUSG00000026812|ENSMUSG00000049892|ENSMUSG00000024042|ENSMUSG00000060032|ENSMUSG00000014303|ENSMUSG00000040407|ENSMUSG00000036036|…	http://amigo.geneontology.org/cgi-bin/amigo/term_details?term=GO:0031327
negative regulation of intracellular signal transduction	Gene Ontology	GO:1902532	52	413	5.48889e-06	0.000166458	ENSMUSG00000020027|ENSMUSG00000029410|ENSMUSG00000049313|ENSMUSG00000038332|ENSMUSG00000027540|ENSMUSG00000007655|ENSMUSG00000009291|ENSMUSG00000003032|ENSMUSG00000020696|ENSMUSG00000028519|ENSMUSG00000020823|ENSMUSG00000038546|ENSMUSG00000001583|ENSMUSG00000043613|ENSMUSG00000017548|ENSMUSG00000002985|ENSMUSG00000019929|ENSMUSG00000010517|ENSMUSG00000014077|ENSMUSG00000004952|ENSMUSG00000023150|…	http://amigo.geneontology.org/cgi-bin/amigo/term_details?term=GO:1902532
response to endogenous stimulus	Gene Ontology	GO:0009719	106	1072	5.57684e-06	0.00016854	ENSMUSG00000048583|ENSMUSG00000020300|ENSMUSG00000027540|ENSMUSG00000028341|ENSMUSG00000041974|ENSMUSG00000033014|ENSMUSG00000033335|ENSMUSG00000030849|ENSMUSG00000036449|ENSMUSG00000004698|ENSMUSG00000019777|ENSMUSG00000015120|ENSMUSG00000063632|ENSMUSG00000063142|ENSMUSG00000026812|ENSMUSG00000074207|ENSMUSG00000024042|ENSMUSG00000029335|ENSMUSG00000029337|ENSMUSG00000092035|ENSMUSG00000025326|…	http://amigo.geneontology.org/cgi-bin/amigo/term_details?term=GO:0009719
transcription regulatory region DNA binding	Gene Ontology	GO:0044212	76	696	5.69912e-06	0.000171642	ENSMUSG00000001419|ENSMUSG00000026826|ENSMUSG00000036390|ENSMUSG00000022383|ENSMUSG00000014303|ENSMUSG00000037992|ENSMUSG00000045680|ENSMUSG00000028023|ENSMUSG00000031681|ENSMUSG00000022895|ENSMUSG00000048904|ENSMUSG00000036144|ENSMUSG00000028341|ENSMUSG00000038402|ENSMUSG00000022528|ENSMUSG00000037025|ENSMUSG00000047407|ENSMUSG00000043456|ENSMUSG00000024513|ENSMUSG00000022553|ENSMUSG00000024922|…	http://amigo.geneontology.org/cgi-bin/amigo/term_details?term=GO:0044212
regulation of cell migration	Gene Ontology	GO:0030334	71	638	6.4429e-06	0.000193376	ENSMUSG00000030170|ENSMUSG00000029417|ENSMUSG00000015957|ENSMUSG00000049313|ENSMUSG00000021338|ENSMUSG00000043613|ENSMUSG00000063450|ENSMUSG00000031207|ENSMUSG00000031548|ENSMUSG00000030562|ENSMUSG00000025856|ENSMUSG00000027954|ENSMUSG00000031443|ENSMUSG00000020696|ENSMUSG00000036144|ENSMUSG00000021360|ENSMUSG00000030110|ENSMUSG00000005534|ENSMUSG00000019278|ENSMUSG00000031565|ENSMUSG00000031785|…	http://amigo.geneontology.org/cgi-bin/amigo/term_details?term=GO:0030334
positive regulation of protein serine/threonine kinase activity	Gene Ontology	GO:0071902	34	222	6.50272e-06	0.000194503	ENSMUSG00000020170|ENSMUSG00000020053|ENSMUSG00000036390|ENSMUSG00000050395|ENSMUSG00000022382|ENSMUSG00000027540|ENSMUSG00000064330|ENSMUSG00000053965|ENSMUSG00000025856|ENSMUSG00000027954|ENSMUSG00000003031|ENSMUSG00000005534|ENSMUSG00000024182|ENSMUSG00000045005|ENSMUSG00000032688|ENSMUSG00000036707|ENSMUSG00000031565|ENSMUSG00000027829|ENSMUSG00000004054|ENSMUSG00000030562|ENSMUSG00000013622|…	http://amigo.geneontology.org/cgi-bin/amigo/term_details?term=GO:0071902
regulatory region DNA binding	Gene Ontology	GO:0000975	76	699	6.54758e-06	0.000195176	ENSMUSG00000001419|ENSMUSG00000026826|ENSMUSG00000036390|ENSMUSG00000022383|ENSMUSG00000014303|ENSMUSG00000037992|ENSMUSG00000045680|ENSMUSG00000028023|ENSMUSG00000031681|ENSMUSG00000022895|ENSMUSG00000048904|ENSMUSG00000036144|ENSMUSG00000028341|ENSMUSG00000038402|ENSMUSG00000022528|ENSMUSG00000037025|ENSMUSG00000047407|ENSMUSG00000043456|ENSMUSG00000024513|ENSMUSG00000022553|ENSMUSG00000024922|…	http://amigo.geneontology.org/cgi-bin/amigo/term_details?term=GO:0000975
regulation of cellular localization	Gene Ontology	GO:0060341	78	724	6.70526e-06	0.000199196	ENSMUSG00000061878|ENSMUSG00000029524|ENSMUSG00000059208|ENSMUSG00000019942|ENSMUSG00000024182|ENSMUSG00000049313|ENSMUSG00000026825|ENSMUSG00000027540|ENSMUSG00000014776|ENSMUSG00000038495|ENSMUSG00000030216|ENSMUSG00000059327|ENSMUSG00000031586|ENSMUSG00000021699|ENSMUSG00000026179|ENSMUSG00000022528|ENSMUSG00000031302|ENSMUSG00000045005|ENSMUSG00000027803|ENSMUSG00000024873|ENSMUSG00000033685|…	http://amigo.geneontology.org/cgi-bin/amigo/term_details?term=GO:0060341
negative regulation of macromolecule biosynthetic process	Gene Ontology	GO:0010558	109	1117	7.01059e-06	0.000207561	ENSMUSG00000020300|ENSMUSG00000059325|ENSMUSG00000028341|ENSMUSG00000021264|ENSMUSG00000020454|ENSMUSG00000058301|ENSMUSG00000030849|ENSMUSG00000017548|ENSMUSG00000004698|ENSMUSG00000019777|ENSMUSG00000024176|ENSMUSG00000015120|ENSMUSG00000020893|ENSMUSG00000026812|ENSMUSG00000049892|ENSMUSG00000024042|ENSMUSG00000060032|ENSMUSG00000014303|ENSMUSG00000075701|ENSMUSG00000036036|ENSMUSG00000019768|…	http://amigo.geneontology.org/cgi-bin/amigo/term_details?term=GO:0010558
neurogenesis	Gene Ontology	GO:0022008	128	1371	8.19389e-06	0.000241775	ENSMUSG00000053198|ENSMUSG00000029510|ENSMUSG00000062252|ENSMUSG00000055003|ENSMUSG00000028023|ENSMUSG00000042211|ENSMUSG00000028341|ENSMUSG00000030110|ENSMUSG00000029207|ENSMUSG00000020454|ENSMUSG00000033335|ENSMUSG00000030849|ENSMUSG00000028933|ENSMUSG00000066235|ENSMUSG00000029291|ENSMUSG00000019777|ENSMUSG00000024176|ENSMUSG00000005583|ENSMUSG00000063632|ENSMUSG00000065954|ENSMUSG00000063142|…	http://amigo.geneontology.org/cgi-bin/amigo/term_details?term=GO:0022008
homeostatic process	Gene Ontology	GO:0042592	130	1400	8.84634e-06	0.000260148	ENSMUSG00000043051|ENSMUSG00000075701|ENSMUSG00000028341|ENSMUSG00000037242|ENSMUSG00000058301|ENSMUSG00000056978|ENSMUSG00000024270|ENSMUSG00000025266|ENSMUSG00000005583|ENSMUSG00000063142|ENSMUSG00000025509|ENSMUSG00000060038|ENSMUSG00000021699|ENSMUSG00000032826|ENSMUSG00000031883|ENSMUSG00000031075|ENSMUSG00000030470|ENSMUSG00000007107|ENSMUSG00000025289|ENSMUSG00000031762|ENSMUSG00000035828|…	http://amigo.geneontology.org/cgi-bin/amigo/term_details?term=GO:0042592
negative regulation of cell death	Gene Ontology	GO:0060548	87	844	9.53464e-06	0.000279448	ENSMUSG00000020300|ENSMUSG00000027540|ENSMUSG00000020696|ENSMUSG00000028341|ENSMUSG00000029207|ENSMUSG00000019278|ENSMUSG00000030849|ENSMUSG00000028933|ENSMUSG00000030847|ENSMUSG00000040451|ENSMUSG00000024176|ENSMUSG00000005583|ENSMUSG00000063632|ENSMUSG00000021103|ENSMUSG00000029524|ENSMUSG00000059146|ENSMUSG00000075701|ENSMUSG00000035828|ENSMUSG00000027656|ENSMUSG00000005514|ENSMUSG00000019777|…	http://amigo.geneontology.org/cgi-bin/amigo/term_details?term=GO:0060548
cell cycle process	Gene Ontology	GO:0022402	95	946	9.8067e-06	0.000286461	ENSMUSG00000048583|ENSMUSG00000026491|ENSMUSG00000016528|ENSMUSG00000029207|ENSMUSG00000058301|ENSMUSG00000030849|ENSMUSG00000032782|ENSMUSG00000028933|ENSMUSG00000024277|ENSMUSG00000004591|ENSMUSG00000028821|ENSMUSG00000026778|ENSMUSG00000015120|ENSMUSG00000021103|ENSMUSG00000032498|ENSMUSG00000021693|ENSMUSG00000040250|ENSMUSG00000033417|ENSMUSG00000001855|ENSMUSG00000061288|ENSMUSG00000002546|…	http://amigo.geneontology.org/cgi-bin/amigo/term_details?term=GO:0022402
transferase activity, transferring phosphorus-containing groups	Gene Ontology	GO:0016772	83	795	9.97969e-06	0.000290542	ENSMUSG00000035305|ENSMUSG00000001891|ENSMUSG00000058793|ENSMUSG00000024070|ENSMUSG00000032594|ENSMUSG00000027952|ENSMUSG00000030110|ENSMUSG00000019970|ENSMUSG00000068917|ENSMUSG00000004591|ENSMUSG00000022433|ENSMUSG00000031012|ENSMUSG00000016528|ENSMUSG00000028573|ENSMUSG00000071072|ENSMUSG00000005534|ENSMUSG00000000881|ENSMUSG00000031565|ENSMUSG00000005320|ENSMUSG00000030397|ENSMUSG00000037251|…	http://amigo.geneontology.org/cgi-bin/amigo/term_details?term=GO:0016772
positive regulation of hydrolase activity	Gene Ontology	GO:0051345	49	389	1.002e-05	0.000290747	ENSMUSG00000028207|ENSMUSG00000050395|ENSMUSG00000026576|ENSMUSG00000023923|ENSMUSG00000033420|ENSMUSG00000029192|ENSMUSG00000003031|ENSMUSG00000032083|ENSMUSG00000032356|ENSMUSG00000031565|ENSMUSG00000028756|ENSMUSG00000003134|ENSMUSG00000002279|ENSMUSG00000033335|ENSMUSG00000030849|ENSMUSG00000032812|ENSMUSG00000039304|ENSMUSG00000041193|ENSMUSG00000026414|ENSMUSG00000002233|ENSMUSG00000049044|…	http://amigo.geneontology.org/cgi-bin/amigo/term_details?term=GO:0051345
regulation of cell motility	Gene Ontology	GO:2000145	73	672	1.01965e-05	0.000294888	ENSMUSG00000030170|ENSMUSG00000029417|ENSMUSG00000015957|ENSMUSG00000049313|ENSMUSG00000021338|ENSMUSG00000043613|ENSMUSG00000063450|ENSMUSG00000031207|ENSMUSG00000031548|ENSMUSG00000030562|ENSMUSG00000025856|ENSMUSG00000027954|ENSMUSG00000031443|ENSMUSG00000020696|ENSMUSG00000036144|ENSMUSG00000021360|ENSMUSG00000030110|ENSMUSG00000005534|ENSMUSG00000019278|ENSMUSG00000031565|ENSMUSG00000031785|…	http://amigo.geneontology.org/cgi-bin/amigo/term_details?term=GO:2000145
regulation of protein kinase activity	Gene Ontology	GO:0045859	62	540	1.0383e-05	0.000299291	ENSMUSG00000020170|ENSMUSG00000020027|ENSMUSG00000036390|ENSMUSG00000050395|ENSMUSG00000022382|ENSMUSG00000027540|ENSMUSG00000020053|ENSMUSG00000064330|ENSMUSG00000053965|ENSMUSG00000025856|ENSMUSG00000027954|ENSMUSG00000003031|ENSMUSG00000028519|ENSMUSG00000034683|ENSMUSG00000005534|ENSMUSG00000003233|ENSMUSG00000031565|ENSMUSG00000024182|ENSMUSG00000024039|ENSMUSG00000032688|ENSMUSG00000036707|…	http://amigo.geneontology.org/cgi-bin/amigo/term_details?term=GO:0045859
extracellular region part	Gene Ontology	GO:0044421	255	3151	1.06824e-05	0.000306909	ENSMUSG00000048583|ENSMUSG00000029510|ENSMUSG00000023262|ENSMUSG00000070427|ENSMUSG00000036707|ENSMUSG00000050395|ENSMUSG00000001687|ENSMUSG00000004535|ENSMUSG00000030218|ENSMUSG00000021712|ENSMUSG00000025856|ENSMUSG00000058624|ENSMUSG00000038642|ENSMUSG00000006333|ENSMUSG00000021266|ENSMUSG00000016528|ENSMUSG00000071072|ENSMUSG00000026491|ENSMUSG00000019278|ENSMUSG00000037242|ENSMUSG00000029203|…	http://amigo.geneontology.org/cgi-bin/amigo/term_details?term=GO:0044421
ATP binding	Gene Ontology	GO:0005524	119	1261	1.10479e-05	0.000316369	ENSMUSG00000024070|ENSMUSG00000024878|ENSMUSG00000016528|ENSMUSG00000030110|ENSMUSG00000058301|ENSMUSG00000029203|ENSMUSG00000023286|ENSMUSG00000030849|ENSMUSG00000028933|ENSMUSG00000004591|ENSMUSG00000020385|ENSMUSG00000030249|ENSMUSG00000020115|ENSMUSG00000015120|ENSMUSG00000052539|ENSMUSG00000032498|ENSMUSG00000021693|ENSMUSG00000024042|ENSMUSG00000059146|ENSMUSG00000030204|ENSMUSG00000022791|…	http://amigo.geneontology.org/cgi-bin/amigo/term_details?term=GO:0005524
neuron part	Gene Ontology	GO:0097458	122	1301	1.11712e-05	0.000318855	ENSMUSG00000062252|ENSMUSG00000020300|ENSMUSG00000030110|ENSMUSG00000071072|ENSMUSG00000024873|ENSMUSG00000033335|ENSMUSG00000030847|ENSMUSG00000032336|ENSMUSG00000029291|ENSMUSG00000070509|ENSMUSG00000015120|ENSMUSG00000063142|ENSMUSG00000032356|ENSMUSG00000026812|ENSMUSG00000032826|ENSMUSG00000022791|ENSMUSG00000028402|ENSMUSG00000041347|ENSMUSG00000054477|ENSMUSG00000028745|ENSMUSG00000002546|…	http://amigo.geneontology.org/cgi-bin/amigo/term_details?term=GO:0097458
negative regulation of phosphorus metabolic process	Gene Ontology	GO:0010563	58	495	1.16056e-05	0.000329101	ENSMUSG00000020027|ENSMUSG00000036390|ENSMUSG00000029410|ENSMUSG00000049313|ENSMUSG00000027540|ENSMUSG00000025856|ENSMUSG00000003032|ENSMUSG00000003031|ENSMUSG00000025665|ENSMUSG00000057719|ENSMUSG00000034683|ENSMUSG00000005534|ENSMUSG00000000881|ENSMUSG00000038546|ENSMUSG00000027584|ENSMUSG00000078429|ENSMUSG00000037025|ENSMUSG00000024427|ENSMUSG00000041459|ENSMUSG00000032501|ENSMUSG00000002985|…	http://amigo.geneontology.org/cgi-bin/amigo/term_details?term=GO:0010563
negative regulation of phosphate metabolic process	Gene Ontology	GO:0045936	58	495	1.16056e-05	0.000329101	ENSMUSG00000020027|ENSMUSG00000036390|ENSMUSG00000029410|ENSMUSG00000049313|ENSMUSG00000027540|ENSMUSG00000025856|ENSMUSG00000003032|ENSMUSG00000003031|ENSMUSG00000025665|ENSMUSG00000057719|ENSMUSG00000034683|ENSMUSG00000005534|ENSMUSG00000000881|ENSMUSG00000038546|ENSMUSG00000027584|ENSMUSG00000078429|ENSMUSG00000037025|ENSMUSG00000024427|ENSMUSG00000041459|ENSMUSG00000032501|ENSMUSG00000002985|…	http://amigo.geneontology.org/cgi-bin/amigo/term_details?term=GO:0045936
negative regulation of phosphorylation	Gene Ontology	GO:0042326	49	392	1.20386e-05	0.000340274	ENSMUSG00000020027|ENSMUSG00000036390|ENSMUSG00000029410|ENSMUSG00000049313|ENSMUSG00000027540|ENSMUSG00000003032|ENSMUSG00000003031|ENSMUSG00000034683|ENSMUSG00000005534|ENSMUSG00000037025|ENSMUSG00000038546|ENSMUSG00000078429|ENSMUSG00000041459|ENSMUSG00000032501|ENSMUSG00000002985|ENSMUSG00000024427|ENSMUSG00000014077|ENSMUSG00000040435|ENSMUSG00000035621|ENSMUSG00000013622|ENSMUSG00000020227|…	http://amigo.geneontology.org/cgi-bin/amigo/term_details?term=GO:0042326
organ morphogenesis	Gene Ontology	GO:0009887	89	877	1.30254e-05	0.000366979	ENSMUSG00000048583|ENSMUSG00000062252|ENSMUSG00000028023|ENSMUSG00000025856|ENSMUSG00000028631|ENSMUSG00000028341|ENSMUSG00000021264|ENSMUSG00000045005|ENSMUSG00000030849|ENSMUSG00000029669|ENSMUSG00000026414|ENSMUSG00000019777|ENSMUSG00000024176|ENSMUSG00000005583|ENSMUSG00000063632|ENSMUSG00000037962|ENSMUSG00000018189|ENSMUSG00000059327|ENSMUSG00000032216|ENSMUSG00000022656|ENSMUSG00000060969|…	http://amigo.geneontology.org/cgi-bin/amigo/term_details?term=GO:0009887
protein complex subunit organization	Gene Ontology	GO:0071822	112	1174	1.31059e-05	0.000368061	ENSMUSG00000026491|ENSMUSG00000030218|ENSMUSG00000058624|ENSMUSG00000041974|ENSMUSG00000058301|ENSMUSG00000029203|ENSMUSG00000033335|ENSMUSG00000026414|ENSMUSG00000061175|ENSMUSG00000039450|ENSMUSG00000004814|ENSMUSG00000063142|ENSMUSG00000060038|ENSMUSG00000026812|ENSMUSG00000022353|ENSMUSG00000075705|ENSMUSG00000028745|ENSMUSG00000002546|ENSMUSG00000028832|ENSMUSG00000020108|ENSMUSG00000001416|…	http://amigo.geneontology.org/cgi-bin/amigo/term_details?term=GO:0071822
tube development	Gene Ontology	GO:0035295	66	593	1.34716e-05	0.000376964	ENSMUSG00000045680|ENSMUSG00000071072|ENSMUSG00000057123|ENSMUSG00000020173|ENSMUSG00000021125|ENSMUSG00000022382|ENSMUSG00000037992|ENSMUSG00000038402|ENSMUSG00000059325|ENSMUSG00000028023|ENSMUSG00000025856|ENSMUSG00000021466|ENSMUSG00000028341|ENSMUSG00000030110|ENSMUSG00000022528|ENSMUSG00000037025|ENSMUSG00000031565|ENSMUSG00000024529|ENSMUSG00000027833|ENSMUSG00000047407|ENSMUSG00000040728|…	http://amigo.geneontology.org/cgi-bin/amigo/term_details?term=GO:0035295
cytoskeleton	Gene Ontology	GO:0005856	152	1711	1.35093e-05	0.000376964	ENSMUSG00000036923|ENSMUSG00000016528|ENSMUSG00000071072|ENSMUSG00000037242|ENSMUSG00000033335|ENSMUSG00000032782|ENSMUSG00000028933|ENSMUSG00000026414|ENSMUSG00000024277|ENSMUSG00000004054|ENSMUSG00000025006|ENSMUSG00000012126|ENSMUSG00000039450|ENSMUSG00000033697|ENSMUSG00000039457|ENSMUSG00000024175|ENSMUSG00000032826|ENSMUSG00000065954|ENSMUSG00000024049|ENSMUSG00000026812|ENSMUSG00000037962|…	http://amigo.geneontology.org/cgi-bin/amigo/term_details?term=GO:0005856
positive regulation of multicellular organismal process	Gene Ontology	GO:0051240	129	1401	1.3875e-05	0.000385936	ENSMUSG00000048583|ENSMUSG00000050395|ENSMUSG00000055003|ENSMUSG00000025856|ENSMUSG00000042211|ENSMUSG00000028341|ENSMUSG00000030110|ENSMUSG00000045005|ENSMUSG00000030849|ENSMUSG00000028933|ENSMUSG00000020115|ENSMUSG00000019777|ENSMUSG00000024176|ENSMUSG00000005583|ENSMUSG00000063632|ENSMUSG00000063142|ENSMUSG00000027947|ENSMUSG00000059146|ENSMUSG00000032497|ENSMUSG00000005320|ENSMUSG00000027523|…	http://amigo.geneontology.org/cgi-bin/amigo/term_details?term=GO:0051240
transcription factor activity, sequence-specific DNA binding	Gene Ontology	GO:0003700	86	841	1.40721e-05	0.000386679	ENSMUSG00000026491|ENSMUSG00000028023|ENSMUSG00000036144|ENSMUSG00000028341|ENSMUSG00000021264|ENSMUSG00000055991|ENSMUSG00000058886|ENSMUSG00000019777|ENSMUSG00000024176|ENSMUSG00000005583|ENSMUSG00000063632|ENSMUSG00000014303|ENSMUSG00000054967|ENSMUSG00000026017|ENSMUSG00000032515|ENSMUSG00000019768|ENSMUSG00000026826|ENSMUSG00000022383|ENSMUSG00000037992|ENSMUSG00000063889|ENSMUSG00000043456|…	http://amigo.geneontology.org/cgi-bin/amigo/term_details?term=GO:0003700
nucleic acid binding transcription factor activity	Gene Ontology	GO:0001071	86	841	1.40721e-05	0.000386679	ENSMUSG00000026491|ENSMUSG00000028023|ENSMUSG00000036144|ENSMUSG00000028341|ENSMUSG00000021264|ENSMUSG00000055991|ENSMUSG00000058886|ENSMUSG00000019777|ENSMUSG00000024176|ENSMUSG00000005583|ENSMUSG00000063632|ENSMUSG00000014303|ENSMUSG00000054967|ENSMUSG00000026017|ENSMUSG00000032515|ENSMUSG00000019768|ENSMUSG00000026826|ENSMUSG00000022383|ENSMUSG00000037992|ENSMUSG00000063889|ENSMUSG00000043456|…	http://amigo.geneontology.org/cgi-bin/amigo/term_details?term=GO:0001071
epithelial tube formation	Gene Ontology	GO:0072175	24	133	1.40788e-05	0.000386679	ENSMUSG00000020173|ENSMUSG00000037992|ENSMUSG00000021466|ENSMUSG00000030110|ENSMUSG00000007880|ENSMUSG00000058886|ENSMUSG00000070509|ENSMUSG00000022286|ENSMUSG00000063632|ENSMUSG00000026812|ENSMUSG00000076431|ENSMUSG00000050288|ENSMUSG00000026872|ENSMUSG00000039765|ENSMUSG00000060733|ENSMUSG00000024176|ENSMUSG00000036180|ENSMUSG00000060969|ENSMUSG00000031734|ENSMUSG00000019979|ENSMUSG00000031548|…	http://amigo.geneontology.org/cgi-bin/amigo/term_details?term=GO:0072175
embryonic epithelial tube formation	Gene Ontology	GO:0001838	24	133	1.40788e-05	0.000386679	ENSMUSG00000020173|ENSMUSG00000037992|ENSMUSG00000021466|ENSMUSG00000030110|ENSMUSG00000007880|ENSMUSG00000058886|ENSMUSG00000070509|ENSMUSG00000022286|ENSMUSG00000063632|ENSMUSG00000026812|ENSMUSG00000076431|ENSMUSG00000050288|ENSMUSG00000026872|ENSMUSG00000039765|ENSMUSG00000060733|ENSMUSG00000024176|ENSMUSG00000036180|ENSMUSG00000060969|ENSMUSG00000031734|ENSMUSG00000019979|ENSMUSG00000031548|…	http://amigo.geneontology.org/cgi-bin/amigo/term_details?term=GO:0001838
adenyl nucleotide binding	Gene Ontology	GO:0030554	121	1298	1.55591e-05	0.000425996	ENSMUSG00000024070|ENSMUSG00000024878|ENSMUSG00000016528|ENSMUSG00000030110|ENSMUSG00000058301|ENSMUSG00000029203|ENSMUSG00000023286|ENSMUSG00000030849|ENSMUSG00000028933|ENSMUSG00000030847|ENSMUSG00000004591|ENSMUSG00000020385|ENSMUSG00000030249|ENSMUSG00000020115|ENSMUSG00000015120|ENSMUSG00000052539|ENSMUSG00000032498|ENSMUSG00000021693|ENSMUSG00000024042|ENSMUSG00000059146|ENSMUSG00000030204|…	http://amigo.geneontology.org/cgi-bin/amigo/term_details?term=GO:0030554
positive regulation of cellular component organization	Gene Ontology	GO:0051130	104	1075	1.58552e-05	0.000432749	ENSMUSG00000048583|ENSMUSG00000030216|ENSMUSG00000023923|ENSMUSG00000055003|ENSMUSG00000058624|ENSMUSG00000042211|ENSMUSG00000030110|ENSMUSG00000041974|ENSMUSG00000030562|ENSMUSG00000023286|ENSMUSG00000033335|ENSMUSG00000039959|ENSMUSG00000010517|ENSMUSG00000025504|ENSMUSG00000029291|ENSMUSG00000019777|ENSMUSG00000020173|ENSMUSG00000026812|ENSMUSG00000059146|ENSMUSG00000002546|ENSMUSG00000003031|…	http://amigo.geneontology.org/cgi-bin/amigo/term_details?term=GO:0051130
regulation of cell differentiation	Gene Ontology	GO:0045595	134	1473	1.61101e-05	0.000438335	ENSMUSG00000059325|ENSMUSG00000042211|ENSMUSG00000030110|ENSMUSG00000020454|ENSMUSG00000033335|ENSMUSG00000030849|ENSMUSG00000028933|ENSMUSG00000031302|ENSMUSG00000023367|ENSMUSG00000017548|ENSMUSG00000004698|ENSMUSG00000019777|ENSMUSG00000024176|ENSMUSG00000005583|ENSMUSG00000063632|ENSMUSG00000054808|ENSMUSG00000037962|ENSMUSG00000024042|ENSMUSG00000059146|ENSMUSG00000056770|ENSMUSG00000030470|…	http://amigo.geneontology.org/cgi-bin/amigo/term_details?term=GO:0045595
epithelial tube morphogenesis	Gene Ontology	GO:0060562	43	330	1.65798e-05	0.000449715	ENSMUSG00000020173|ENSMUSG00000022382|ENSMUSG00000037992|ENSMUSG00000045680|ENSMUSG00000030218|ENSMUSG00000028023|ENSMUSG00000021466|ENSMUSG00000030110|ENSMUSG00000022528|ENSMUSG00000037025|ENSMUSG00000037242|ENSMUSG00000047407|ENSMUSG00000040728|ENSMUSG00000030849|ENSMUSG00000007880|ENSMUSG00000058886|ENSMUSG00000060733|ENSMUSG00000032359|ENSMUSG00000005583|ENSMUSG00000063632|ENSMUSG00000020053|…	http://amigo.geneontology.org/cgi-bin/amigo/term_details?term=GO:0060562
regulation of protein transport	Gene Ontology	GO:0051223	71	660	1.7992e-05	0.000486508	ENSMUSG00000020053|ENSMUSG00000059208|ENSMUSG00000050395|ENSMUSG00000027540|ENSMUSG00000035621|ENSMUSG00000057123|ENSMUSG00000030216|ENSMUSG00000059327|ENSMUSG00000026778|ENSMUSG00000031586|ENSMUSG00000014776|ENSMUSG00000032083|ENSMUSG00000022528|ENSMUSG00000015568|ENSMUSG00000020848|ENSMUSG00000027803|ENSMUSG00000033685|ENSMUSG00000023286|ENSMUSG00000023349|ENSMUSG00000022200|ENSMUSG00000031488|…	http://amigo.geneontology.org/cgi-bin/amigo/term_details?term=GO:0051223
sequence-specific DNA binding	Gene Ontology	GO:0043565	87	860	1.81031e-05	0.000488001	ENSMUSG00000028023|ENSMUSG00000028341|ENSMUSG00000021264|ENSMUSG00000058301|ENSMUSG00000017548|ENSMUSG00000019777|ENSMUSG00000024176|ENSMUSG00000005583|ENSMUSG00000063632|ENSMUSG00000054808|ENSMUSG00000014303|ENSMUSG00000060969|ENSMUSG00000026017|ENSMUSG00000025498|ENSMUSG00000019768|ENSMUSG00000026826|ENSMUSG00000022383|ENSMUSG00000037992|ENSMUSG00000063889|ENSMUSG00000002870|ENSMUSG00000024513|…	http://amigo.geneontology.org/cgi-bin/amigo/term_details?term=GO:0043565
negative regulation of nitrogen compound metabolic process	Gene Ontology	GO:0051172	113	1197	1.82356e-05	0.000490061	ENSMUSG00000020300|ENSMUSG00000059325|ENSMUSG00000028341|ENSMUSG00000021264|ENSMUSG00000020454|ENSMUSG00000058301|ENSMUSG00000030849|ENSMUSG00000017548|ENSMUSG00000004698|ENSMUSG00000019777|ENSMUSG00000024176|ENSMUSG00000015120|ENSMUSG00000020893|ENSMUSG00000032498|ENSMUSG00000026812|ENSMUSG00000015837|ENSMUSG00000049892|ENSMUSG00000024042|ENSMUSG00000060032|ENSMUSG00000014303|ENSMUSG00000040407|…	http://amigo.geneontology.org/cgi-bin/amigo/term_details?term=GO:0051172
adenyl ribonucleotide binding	Gene Ontology	GO:0032559	120	1291	1.90164e-05	0.000509475	ENSMUSG00000024070|ENSMUSG00000024878|ENSMUSG00000016528|ENSMUSG00000030110|ENSMUSG00000058301|ENSMUSG00000029203|ENSMUSG00000023286|ENSMUSG00000030849|ENSMUSG00000028933|ENSMUSG00000004591|ENSMUSG00000020385|ENSMUSG00000030249|ENSMUSG00000020115|ENSMUSG00000015120|ENSMUSG00000052539|ENSMUSG00000032498|ENSMUSG00000021693|ENSMUSG00000024042|ENSMUSG00000059146|ENSMUSG00000030204|ENSMUSG00000022791|…	http://amigo.geneontology.org/cgi-bin/amigo/term_details?term=GO:0032559
regulation of cellular protein localization	Gene Ontology	GO:1903827	55	470	1.99992e-05	0.000534169	ENSMUSG00000061878|ENSMUSG00000029524|ENSMUSG00000059208|ENSMUSG00000019942|ENSMUSG00000049313|ENSMUSG00000027540|ENSMUSG00000020053|ENSMUSG00000031207|ENSMUSG00000030216|ENSMUSG00000059327|ENSMUSG00000031586|ENSMUSG00000014776|ENSMUSG00000022528|ENSMUSG00000024182|ENSMUSG00000045005|ENSMUSG00000027803|ENSMUSG00000041974|ENSMUSG00000049493|ENSMUSG00000076431|ENSMUSG00000028998|ENSMUSG00000025006|…	http://amigo.geneontology.org/cgi-bin/amigo/term_details?term=GO:1903827
actin filament organization	Gene Ontology	GO:0007015	38	279	2.11767e-05	0.000563895	ENSMUSG00000033444|ENSMUSG00000020173|ENSMUSG00000019359|ENSMUSG00000032812|ENSMUSG00000006304|ENSMUSG00000030562|ENSMUSG00000054808|ENSMUSG00000032083|ENSMUSG00000052374|ENSMUSG00000016382|ENSMUSG00000049493|ENSMUSG00000029621|ENSMUSG00000038013|ENSMUSG00000026414|ENSMUSG00000029465|ENSMUSG00000026778|ENSMUSG00000029291|ENSMUSG00000004814|ENSMUSG00000022018|ENSMUSG00000045092|ENSMUSG00000021338|…	http://amigo.geneontology.org/cgi-bin/amigo/term_details?term=GO:0007015
negative regulation of protein modification process	Gene Ontology	GO:0031400	54	460	2.19215e-05	0.000581951	ENSMUSG00000020027|ENSMUSG00000036390|ENSMUSG00000029410|ENSMUSG00000049313|ENSMUSG00000027540|ENSMUSG00000002052|ENSMUSG00000003032|ENSMUSG00000003031|ENSMUSG00000034683|ENSMUSG00000005534|ENSMUSG00000017548|ENSMUSG00000038546|ENSMUSG00000032523|ENSMUSG00000078429|ENSMUSG00000041459|ENSMUSG00000022307|ENSMUSG00000032501|ENSMUSG00000002985|ENSMUSG00000024427|ENSMUSG00000025220|ENSMUSG00000014077|…	http://amigo.geneontology.org/cgi-bin/amigo/term_details?term=GO:0031400
intrinsic component of membrane	Gene Ontology	GO:0031224	332	4317	2.24246e-05	0.000593504	ENSMUSG00000068732|ENSMUSG00000029510|ENSMUSG00000027884|ENSMUSG00000030217|ENSMUSG00000050395|ENSMUSG00000062252|ENSMUSG00000021135|ENSMUSG00000009035|ENSMUSG00000005514|ENSMUSG00000055003|ENSMUSG00000030351|ENSMUSG00000031105|ENSMUSG00000033152|ENSMUSG00000027341|ENSMUSG00000050558|ENSMUSG00000021265|ENSMUSG00000030110|ENSMUSG00000078681|ENSMUSG00000019278|ENSMUSG00000037242|ENSMUSG00000026235|…	http://amigo.geneontology.org/cgi-bin/amigo/term_details?term=GO:0031224
generation of neurons	Gene Ontology	GO:0048699	119	1283	2.2497e-05	0.000593621	ENSMUSG00000029510|ENSMUSG00000062252|ENSMUSG00000055003|ENSMUSG00000028023|ENSMUSG00000042211|ENSMUSG00000028341|ENSMUSG00000030110|ENSMUSG00000029207|ENSMUSG00000020454|ENSMUSG00000033335|ENSMUSG00000030849|ENSMUSG00000028933|ENSMUSG00000066235|ENSMUSG00000029291|ENSMUSG00000019777|ENSMUSG00000024176|ENSMUSG00000005583|ENSMUSG00000063632|ENSMUSG00000063142|ENSMUSG00000032356|ENSMUSG00000017485|…	http://amigo.geneontology.org/cgi-bin/amigo/term_details?term=GO:0048699
growth	Gene Ontology	GO:0040007	91	917	2.27535e-05	0.000598582	ENSMUSG00000048583|ENSMUSG00000059325|ENSMUSG00000038256|ENSMUSG00000029207|ENSMUSG00000037242|ENSMUSG00000033335|ENSMUSG00000030849|ENSMUSG00000036334|ENSMUSG00000028933|ENSMUSG00000029291|ENSMUSG00000070509|ENSMUSG00000005583|ENSMUSG00000021699|ENSMUSG00000026819|ENSMUSG00000059146|ENSMUSG00000029335|ENSMUSG00000027394|ENSMUSG00000025326|ENSMUSG00000027656|ENSMUSG00000005514|ENSMUSG00000019777|…	http://amigo.geneontology.org/cgi-bin/amigo/term_details?term=GO:0040007
tube formation	Gene Ontology	GO:0035148	25	147	2.28272e-05	0.000598717	ENSMUSG00000020173|ENSMUSG00000037992|ENSMUSG00000059327|ENSMUSG00000021466|ENSMUSG00000030110|ENSMUSG00000007880|ENSMUSG00000058886|ENSMUSG00000070509|ENSMUSG00000022286|ENSMUSG00000063632|ENSMUSG00000026812|ENSMUSG00000076431|ENSMUSG00000050288|ENSMUSG00000026872|ENSMUSG00000039765|ENSMUSG00000060733|ENSMUSG00000024176|ENSMUSG00000036180|ENSMUSG00000060969|ENSMUSG00000031734|ENSMUSG00000019979|…	http://amigo.geneontology.org/cgi-bin/amigo/term_details?term=GO:0035148
transferase activity	Gene Ontology	GO:0016740	169	1965	2.29909e-05	0.000601206	ENSMUSG00000030217|ENSMUSG00000024070|ENSMUSG00000021712|ENSMUSG00000020696|ENSMUSG00000016528|ENSMUSG00000030110|ENSMUSG00000041975|ENSMUSG00000022433|ENSMUSG00000029203|ENSMUSG00000023286|ENSMUSG00000030849|ENSMUSG00000004054|ENSMUSG00000020385|ENSMUSG00000017548|ENSMUSG00000032336|ENSMUSG00000066235|ENSMUSG00000020115|ENSMUSG00000026778|ENSMUSG00000015120|ENSMUSG00000021103|ENSMUSG00000029524|…	http://amigo.geneontology.org/cgi-bin/amigo/term_details?term=GO:0016740
regulation of sequence-specific DNA binding transcription factor activity	Gene Ontology	GO:0051090	41	313	2.31428e-05	0.000603372	ENSMUSG00000034023|ENSMUSG00000003032|ENSMUSG00000078923|ENSMUSG00000048904|ENSMUSG00000037025|ENSMUSG00000032688|ENSMUSG00000029484|ENSMUSG00000001627|ENSMUSG00000034610|ENSMUSG00000062563|ENSMUSG00000032501|ENSMUSG00000042895|ENSMUSG00000026778|ENSMUSG00000014077|ENSMUSG00000021025|ENSMUSG00000019777|ENSMUSG00000015120|ENSMUSG00000022018|ENSMUSG00000026637|ENSMUSG00000031392|ENSMUSG00000026484|…	http://amigo.geneontology.org/cgi-bin/amigo/term_details?term=GO:0051090
circulatory system development	Gene Ontology	GO:0072359	88	880	2.39806e-05	0.000621504	ENSMUSG00000019942|ENSMUSG00000059325|ENSMUSG00000028023|ENSMUSG00000025856|ENSMUSG00000021266|ENSMUSG00000037242|ENSMUSG00000033335|ENSMUSG00000030849|ENSMUSG00000029669|ENSMUSG00000026414|ENSMUSG00000004698|ENSMUSG00000004814|ENSMUSG00000005583|ENSMUSG00000063632|ENSMUSG00000021103|ENSMUSG00000026812|ENSMUSG00000024042|ENSMUSG00000059146|ENSMUSG00000030470|ENSMUSG00000034881|ENSMUSG00000019777|…	http://amigo.geneontology.org/cgi-bin/amigo/term_details?term=GO:0072359
cardiovascular system development	Gene Ontology	GO:0072358	88	880	2.39806e-05	0.000621504	ENSMUSG00000019942|ENSMUSG00000059325|ENSMUSG00000028023|ENSMUSG00000025856|ENSMUSG00000021266|ENSMUSG00000037242|ENSMUSG00000033335|ENSMUSG00000030849|ENSMUSG00000029669|ENSMUSG00000026414|ENSMUSG00000004698|ENSMUSG00000004814|ENSMUSG00000005583|ENSMUSG00000063632|ENSMUSG00000021103|ENSMUSG00000026812|ENSMUSG00000024042|ENSMUSG00000059146|ENSMUSG00000030470|ENSMUSG00000034881|ENSMUSG00000019777|…	http://amigo.geneontology.org/cgi-bin/amigo/term_details?term=GO:0072358
sequence-specific double-stranded DNA binding	Gene Ontology	GO:1990837	64	581	2.41135e-05	0.000622253	ENSMUSG00000038718|ENSMUSG00000026826|ENSMUSG00000036923|ENSMUSG00000022383|ENSMUSG00000014303|ENSMUSG00000037992|ENSMUSG00000021264|ENSMUSG00000028023|ENSMUSG00000022895|ENSMUSG00000022335|ENSMUSG00000056501|ENSMUSG00000028341|ENSMUSG00000038402|ENSMUSG00000003154|ENSMUSG00000037025|ENSMUSG00000002870|ENSMUSG00000043456|ENSMUSG00000024513|ENSMUSG00000022553|ENSMUSG00000024922|ENSMUSG00000028639|…	http://amigo.geneontology.org/cgi-bin/amigo/term_details?term=GO:1990837
double-stranded DNA binding	Gene Ontology	GO:0003690	69	642	2.4152e-05	0.000622253	ENSMUSG00000001419|ENSMUSG00000026826|ENSMUSG00000036923|ENSMUSG00000022383|ENSMUSG00000014303|ENSMUSG00000037992|ENSMUSG00000021264|ENSMUSG00000028023|ENSMUSG00000022895|ENSMUSG00000022335|ENSMUSG00000056501|ENSMUSG00000028341|ENSMUSG00000038402|ENSMUSG00000003154|ENSMUSG00000037025|ENSMUSG00000002870|ENSMUSG00000043456|ENSMUSG00000024513|ENSMUSG00000022553|ENSMUSG00000024922|ENSMUSG00000028639|…	http://amigo.geneontology.org/cgi-bin/amigo/term_details?term=GO:0003690
regulation of actin filament-based process	Gene Ontology	GO:0032970	38	281	2.43793e-05	0.000626262	ENSMUSG00000033444|ENSMUSG00000057123|ENSMUSG00000032812|ENSMUSG00000021338|ENSMUSG00000059146|ENSMUSG00000021699|ENSMUSG00000032083|ENSMUSG00000052374|ENSMUSG00000030562|ENSMUSG00000029621|ENSMUSG00000004814|ENSMUSG00000038013|ENSMUSG00000026414|ENSMUSG00000054889|ENSMUSG00000006304|ENSMUSG00000029465|ENSMUSG00000026778|ENSMUSG00000019777|ENSMUSG00000005583|ENSMUSG00000022018|ENSMUSG00000045092|…	http://amigo.geneontology.org/cgi-bin/amigo/term_details?term=GO:0032970
phosphotransferase activity, alcohol group as acceptor	Gene Ontology	GO:0016773	67	620	2.70554e-05	0.000692966	ENSMUSG00000035305|ENSMUSG00000034165|ENSMUSG00000024235|ENSMUSG00000024070|ENSMUSG00000068917|ENSMUSG00000019970|ENSMUSG00000028573|ENSMUSG00000004591|ENSMUSG00000016528|ENSMUSG00000030110|ENSMUSG00000005534|ENSMUSG00000031565|ENSMUSG00000005320|ENSMUSG00000030397|ENSMUSG00000037251|ENSMUSG00000025162|ENSMUSG00000030849|ENSMUSG00000001583|ENSMUSG00000067941|ENSMUSG00000019942|ENSMUSG00000004054|…	http://amigo.geneontology.org/cgi-bin/amigo/term_details?term=GO:0016773
regulation of mitotic cell cycle	Gene Ontology	GO:0007346	43	338	2.77052e-05	0.000705991	ENSMUSG00000048583|ENSMUSG00000036923|ENSMUSG00000030094|ENSMUSG00000048904|ENSMUSG00000022528|ENSMUSG00000034683|ENSMUSG00000005534|ENSMUSG00000031565|ENSMUSG00000031928|ENSMUSG00000078429|ENSMUSG00000030849|ENSMUSG00000024922|ENSMUSG00000029022|ENSMUSG00000002871|ENSMUSG00000030649|ENSMUSG00000019942|ENSMUSG00000032010|ENSMUSG00000004591|ENSMUSG00000017485|ENSMUSG00000039128|ENSMUSG00000028999|…	http://amigo.geneontology.org/cgi-bin/amigo/term_details?term=GO:0007346
kidney development	Gene Ontology	GO:0001822	34	240	2.77255e-05	0.000705991	ENSMUSG00000021125|ENSMUSG00000022382|ENSMUSG00000037992|ENSMUSG00000045680|ENSMUSG00000025856|ENSMUSG00000021466|ENSMUSG00000030110|ENSMUSG00000022528|ENSMUSG00000031565|ENSMUSG00000030849|ENSMUSG00000024922|ENSMUSG00000032327|ENSMUSG00000001642|ENSMUSG00000031681|ENSMUSG00000062563|ENSMUSG00000024176|ENSMUSG00000005583|ENSMUSG00000022292|ENSMUSG00000026812|ENSMUSG00000030087|ENSMUSG00000076431|…	http://amigo.geneontology.org/cgi-bin/amigo/term_details?term=GO:0001822
kinase activity	Gene Ontology	GO:0016301	71	670	2.80228e-05	0.000711487	ENSMUSG00000035305|ENSMUSG00000034165|ENSMUSG00000024235|ENSMUSG00000024070|ENSMUSG00000068917|ENSMUSG00000027952|ENSMUSG00000028573|ENSMUSG00000019970|ENSMUSG00000004591|ENSMUSG00000016528|ENSMUSG00000030110|ENSMUSG00000005534|ENSMUSG00000000881|ENSMUSG00000031565|ENSMUSG00000030397|ENSMUSG00000037251|ENSMUSG00000025162|ENSMUSG00000030849|ENSMUSG00000001583|ENSMUSG00000067941|ENSMUSG00000019942|…	http://amigo.geneontology.org/cgi-bin/amigo/term_details?term=GO:0016301
cell adhesion	Gene Ontology	GO:0007155	119	1292	2.98122e-05	0.000754725	ENSMUSG00000048583|ENSMUSG00000059327|ENSMUSG00000033152|ENSMUSG00000028341|ENSMUSG00000030110|ENSMUSG00000022565|ENSMUSG00000045005|ENSMUSG00000033335|ENSMUSG00000030847|ENSMUSG00000004591|ENSMUSG00000025006|ENSMUSG00000032336|ENSMUSG00000039457|ENSMUSG00000060038|ENSMUSG00000026812|ENSMUSG00000028339|ENSMUSG00000031881|ENSMUSG00000028402|ENSMUSG00000026305|ENSMUSG00000022656|ENSMUSG00000027656|…	http://amigo.geneontology.org/cgi-bin/amigo/term_details?term=GO:0007155
mitotic cell cycle process	Gene Ontology	GO:1903047	66	610	2.99508e-05	0.000755847	ENSMUSG00000048583|ENSMUSG00000036923|ENSMUSG00000026491|ENSMUSG00000030094|ENSMUSG00000037286|ENSMUSG00000034021|ENSMUSG00000048904|ENSMUSG00000057469|ENSMUSG00000034683|ENSMUSG00000005534|ENSMUSG00000038685|ENSMUSG00000031565|ENSMUSG00000030397|ENSMUSG00000031928|ENSMUSG00000078429|ENSMUSG00000030849|ENSMUSG00000032782|ENSMUSG00000029022|ENSMUSG00000002871|ENSMUSG00000030649|ENSMUSG00000019942|…	http://amigo.geneontology.org/cgi-bin/amigo/term_details?term=GO:1903047
endomembrane system	Gene Ontology	GO:0012505	247	3085	3.00297e-05	0.000755847	ENSMUSG00000068732|ENSMUSG00000029510|ENSMUSG00000020300|ENSMUSG00000026491|ENSMUSG00000060227|ENSMUSG00000027540|ENSMUSG00000020261|ENSMUSG00000005514|ENSMUSG00000020263|ENSMUSG00000049892|ENSMUSG00000021712|ENSMUSG00000059327|ENSMUSG00000029192|ENSMUSG00000020696|ENSMUSG00000030110|ENSMUSG00000045005|ENSMUSG00000028745|ENSMUSG00000024873|ENSMUSG00000090213|ENSMUSG00000023286|ENSMUSG00000003484|…	http://amigo.geneontology.org/cgi-bin/amigo/term_details?term=GO:0012505
regulation of locomotion	Gene Ontology	GO:0040012	74	709	3.01951e-05	0.000757827	ENSMUSG00000030170|ENSMUSG00000029417|ENSMUSG00000015957|ENSMUSG00000049313|ENSMUSG00000021338|ENSMUSG00000043613|ENSMUSG00000063450|ENSMUSG00000031207|ENSMUSG00000031548|ENSMUSG00000030562|ENSMUSG00000025856|ENSMUSG00000027954|ENSMUSG00000031443|ENSMUSG00000020696|ENSMUSG00000036144|ENSMUSG00000021360|ENSMUSG00000030110|ENSMUSG00000005534|ENSMUSG00000019278|ENSMUSG00000031565|ENSMUSG00000031785|…	http://amigo.geneontology.org/cgi-bin/amigo/term_details?term=GO:0040012
RNA polymerase II transcription factor activity, sequence-specific DNA binding	Gene Ontology	GO:0000981	63	574	3.0709e-05	0.000768517	ENSMUSG00000045680|ENSMUSG00000026826|ENSMUSG00000022383|ENSMUSG00000042622|ENSMUSG00000037992|ENSMUSG00000020472|ENSMUSG00000028023|ENSMUSG00000031681|ENSMUSG00000022895|ENSMUSG00000094870|ENSMUSG00000022335|ENSMUSG00000051510|ENSMUSG00000028341|ENSMUSG00000038402|ENSMUSG00000022528|ENSMUSG00000037025|ENSMUSG00000043456|ENSMUSG00000047407|ENSMUSG00000024922|ENSMUSG00000028639|ENSMUSG00000041459|…	http://amigo.geneontology.org/cgi-bin/amigo/term_details?term=GO:0000981
kidney epithelium development	Gene Ontology	GO:0072073	23	131	3.083e-05	0.000769341	ENSMUSG00000021125|ENSMUSG00000022382|ENSMUSG00000037992|ENSMUSG00000030110|ENSMUSG00000045680|ENSMUSG00000022528|ENSMUSG00000031565|ENSMUSG00000030849|ENSMUSG00000031681|ENSMUSG00000024176|ENSMUSG00000005583|ENSMUSG00000021466|ENSMUSG00000030087|ENSMUSG00000037211|ENSMUSG00000029086|ENSMUSG00000031558|ENSMUSG00000027803|ENSMUSG00000026180|ENSMUSG00000022353|ENSMUSG00000060969|ENSMUSG00000031734|…	http://amigo.geneontology.org/cgi-bin/amigo/term_details?term=GO:0072073
glycerolipid metabolic process	Gene Ontology	GO:0046486	33	231	3.11533e-05	0.000775193	ENSMUSG00000058793|ENSMUSG00000024052|ENSMUSG00000025856|ENSMUSG00000026737|ENSMUSG00000030759|ENSMUSG00000035596|ENSMUSG00000032083|ENSMUSG00000029055|ENSMUSG00000015568|ENSMUSG00000022561|ENSMUSG00000002279|ENSMUSG00000041193|ENSMUSG00000028093|ENSMUSG00000002985|ENSMUSG00000027357|ENSMUSG00000078650|ENSMUSG00000015214|ENSMUSG00000025509|ENSMUSG00000032594|ENSMUSG00000024042|ENSMUSG00000029330|…	http://amigo.geneontology.org/cgi-bin/amigo/term_details?term=GO:0046486
chemical homeostasis	Gene Ontology	GO:0048878	89	901	3.26264e-05	0.000809543	ENSMUSG00000040414|ENSMUSG00000030562|ENSMUSG00000056978|ENSMUSG00000024270|ENSMUSG00000063142|ENSMUSG00000025509|ENSMUSG00000060038|ENSMUSG00000021699|ENSMUSG00000032826|ENSMUSG00000031883|ENSMUSG00000031075|ENSMUSG00000030470|ENSMUSG00000007107|ENSMUSG00000031762|ENSMUSG00000035828|ENSMUSG00000031504|ENSMUSG00000034881|ENSMUSG00000019768|ENSMUSG00000051149|ENSMUSG00000022382|ENSMUSG00000044217|…	http://amigo.geneontology.org/cgi-bin/amigo/term_details?term=GO:0048878
protein kinase activity	Gene Ontology	GO:0004672	59	529	3.59883e-05	0.000890431	ENSMUSG00000035305|ENSMUSG00000034165|ENSMUSG00000024070|ENSMUSG00000019970|ENSMUSG00000004591|ENSMUSG00000016528|ENSMUSG00000030110|ENSMUSG00000005534|ENSMUSG00000031565|ENSMUSG00000030397|ENSMUSG00000037251|ENSMUSG00000025162|ENSMUSG00000030849|ENSMUSG00000001583|ENSMUSG00000067941|ENSMUSG00000019942|ENSMUSG00000004054|ENSMUSG00000020385|ENSMUSG00000026437|ENSMUSG00000042724|ENSMUSG00000024235|…	http://amigo.geneontology.org/cgi-bin/amigo/term_details?term=GO:0004672
negative regulation of protein phosphorylation	Gene Ontology	GO:0001933	44	354	3.70776e-05	0.000914791	ENSMUSG00000020027|ENSMUSG00000036390|ENSMUSG00000029410|ENSMUSG00000049313|ENSMUSG00000027540|ENSMUSG00000003032|ENSMUSG00000003031|ENSMUSG00000034683|ENSMUSG00000005534|ENSMUSG00000017548|ENSMUSG00000038546|ENSMUSG00000078429|ENSMUSG00000041459|ENSMUSG00000032501|ENSMUSG00000002985|ENSMUSG00000024427|ENSMUSG00000014077|ENSMUSG00000040435|ENSMUSG00000013622|ENSMUSG00000020227|ENSMUSG00000020893|…	http://amigo.geneontology.org/cgi-bin/amigo/term_details?term=GO:0001933
extracellular region	Gene Ontology	GO:0005576	285	3651	3.76817e-05	0.000927076	ENSMUSG00000048583|ENSMUSG00000029510|ENSMUSG00000023262|ENSMUSG00000070427|ENSMUSG00000036707|ENSMUSG00000050395|ENSMUSG00000001687|ENSMUSG00000031603|ENSMUSG00000030218|ENSMUSG00000021712|ENSMUSG00000025856|ENSMUSG00000058624|ENSMUSG00000038642|ENSMUSG00000006333|ENSMUSG00000019880|ENSMUSG00000021266|ENSMUSG00000016528|ENSMUSG00000071072|ENSMUSG00000026491|ENSMUSG00000019278|ENSMUSG00000037242|…	http://amigo.geneontology.org/cgi-bin/amigo/term_details?term=GO:0005576
biological adhesion	Gene Ontology	GO:0022610	119	1300	3.81182e-05	0.00093518	ENSMUSG00000048583|ENSMUSG00000059327|ENSMUSG00000033152|ENSMUSG00000028341|ENSMUSG00000030110|ENSMUSG00000022565|ENSMUSG00000045005|ENSMUSG00000033335|ENSMUSG00000030847|ENSMUSG00000004591|ENSMUSG00000025006|ENSMUSG00000032336|ENSMUSG00000039457|ENSMUSG00000060038|ENSMUSG00000026812|ENSMUSG00000028339|ENSMUSG00000031881|ENSMUSG00000028402|ENSMUSG00000026305|ENSMUSG00000022656|ENSMUSG00000027656|…	http://amigo.geneontology.org/cgi-bin/amigo/term_details?term=GO:0022610
positive regulation of cell proliferation	Gene Ontology	GO:0008284	78	766	3.9864e-05	0.000975272	ENSMUSG00000048583|ENSMUSG00000045092|ENSMUSG00000034165|ENSMUSG00000048373|ENSMUSG00000021360|ENSMUSG00000022382|ENSMUSG00000037992|ENSMUSG00000020053|ENSMUSG00000031603|ENSMUSG00000028023|ENSMUSG00000025856|ENSMUSG00000033031|ENSMUSG00000089989|ENSMUSG00000003031|ENSMUSG00000028341|ENSMUSG00000005534|ENSMUSG00000022528|ENSMUSG00000031548|ENSMUSG00000031565|ENSMUSG00000027833|ENSMUSG00000031785|…	http://amigo.geneontology.org/cgi-bin/amigo/term_details?term=GO:0008284
enzyme regulator activity	Gene Ontology	GO:0030234	79	779	4.04196e-05	0.000986102	ENSMUSG00000048583|ENSMUSG00000020027|ENSMUSG00000030216|ENSMUSG00000024182|ENSMUSG00000032812|ENSMUSG00000037992|ENSMUSG00000006575|ENSMUSG00000028573|ENSMUSG00000052144|ENSMUSG00000026678|ENSMUSG00000029192|ENSMUSG00000003032|ENSMUSG00000032083|ENSMUSG00000033688|ENSMUSG00000026812|ENSMUSG00000036198|ENSMUSG00000057719|ENSMUSG00000034683|ENSMUSG00000025154|ENSMUSG00000019278|ENSMUSG00000027342|…	http://amigo.geneontology.org/cgi-bin/amigo/term_details?term=GO:0030234
negative regulation of transcription, DNA-templated	Gene Ontology	GO:0045892	89	907	4.0674e-05	0.000989546	ENSMUSG00000059325|ENSMUSG00000028341|ENSMUSG00000021264|ENSMUSG00000030849|ENSMUSG00000017548|ENSMUSG00000004698|ENSMUSG00000019777|ENSMUSG00000024176|ENSMUSG00000015120|ENSMUSG00000063632|ENSMUSG00000049892|ENSMUSG00000024042|ENSMUSG00000060032|ENSMUSG00000014303|ENSMUSG00000036036|ENSMUSG00000019768|ENSMUSG00000026826|ENSMUSG00000022383|ENSMUSG00000037992|ENSMUSG00000055609|ENSMUSG00000027954|…	http://amigo.geneontology.org/cgi-bin/amigo/term_details?term=GO:0045892
plasma membrane part	Gene Ontology	GO:0044459	166	1946	4.07965e-05	0.000989769	ENSMUSG00000062252|ENSMUSG00000023923|ENSMUSG00000030351|ENSMUSG00000059327|ENSMUSG00000050558|ENSMUSG00000030110|ENSMUSG00000022565|ENSMUSG00000022561|ENSMUSG00000024873|ENSMUSG00000028631|ENSMUSG00000022756|ENSMUSG00000027947|ENSMUSG00000003484|ENSMUSG00000030849|ENSMUSG00000029669|ENSMUSG00000024270|ENSMUSG00000023978|ENSMUSG00000025504|ENSMUSG00000004952|ENSMUSG00000031904|ENSMUSG00000026778|…	http://amigo.geneontology.org/cgi-bin/amigo/term_details?term=GO:0044459
renal system development	Gene Ontology	GO:0072001	35	256	4.10698e-05	0.000993639	ENSMUSG00000021125|ENSMUSG00000022382|ENSMUSG00000037992|ENSMUSG00000045680|ENSMUSG00000025856|ENSMUSG00000021466|ENSMUSG00000030110|ENSMUSG00000022528|ENSMUSG00000031565|ENSMUSG00000030849|ENSMUSG00000024922|ENSMUSG00000032327|ENSMUSG00000001642|ENSMUSG00000031681|ENSMUSG00000062563|ENSMUSG00000024176|ENSMUSG00000005583|ENSMUSG00000022292|ENSMUSG00000026812|ENSMUSG00000030087|ENSMUSG00000076431|…	http://amigo.geneontology.org/cgi-bin/amigo/term_details?term=GO:0072001
respiratory system development	Gene Ontology	GO:0060541	31	214	4.22798e-05	0.0010181	ENSMUSG00000071072|ENSMUSG00000022382|ENSMUSG00000037992|ENSMUSG00000059325|ENSMUSG00000028023|ENSMUSG00000025856|ENSMUSG00000045680|ENSMUSG00000022528|ENSMUSG00000037025|ENSMUSG00000031565|ENSMUSG00000040728|ENSMUSG00000030849|ENSMUSG00000028635|ENSMUSG00000005320|ENSMUSG00000032359|ENSMUSG00000063632|ENSMUSG00000063594|ENSMUSG00000020053|ENSMUSG00000016194|ENSMUSG00000030218|ENSMUSG00000064325|…	http://amigo.geneontology.org/cgi-bin/amigo/term_details?term=GO:0060541
negative regulation of RNA biosynthetic process	Gene Ontology	GO:1902679	90	921	4.23138e-05	0.0010181	ENSMUSG00000059325|ENSMUSG00000028341|ENSMUSG00000021264|ENSMUSG00000030849|ENSMUSG00000017548|ENSMUSG00000004698|ENSMUSG00000019777|ENSMUSG00000024176|ENSMUSG00000015120|ENSMUSG00000063632|ENSMUSG00000049892|ENSMUSG00000024042|ENSMUSG00000060032|ENSMUSG00000014303|ENSMUSG00000036036|ENSMUSG00000019768|ENSMUSG00000026826|ENSMUSG00000022383|ENSMUSG00000037992|ENSMUSG00000055609|ENSMUSG00000027954|…	http://amigo.geneontology.org/cgi-bin/amigo/term_details?term=GO:1902679
positive regulation of protein kinase activity	Gene Ontology	GO:0045860	42	334	4.34334e-05	0.00104216	ENSMUSG00000020170|ENSMUSG00000020053|ENSMUSG00000036390|ENSMUSG00000050395|ENSMUSG00000022382|ENSMUSG00000027540|ENSMUSG00000064330|ENSMUSG00000053965|ENSMUSG00000025856|ENSMUSG00000027954|ENSMUSG00000003031|ENSMUSG00000028519|ENSMUSG00000005534|ENSMUSG00000024182|ENSMUSG00000045005|ENSMUSG00000032688|ENSMUSG00000036707|ENSMUSG00000031565|ENSMUSG00000027829|ENSMUSG00000036923|ENSMUSG00000004054|…	http://amigo.geneontology.org/cgi-bin/amigo/term_details?term=GO:0045860
negative regulation of nucleic acid-templated transcription	Gene Ontology	GO:1903507	89	909	4.37412e-05	0.00104667	ENSMUSG00000059325|ENSMUSG00000028341|ENSMUSG00000021264|ENSMUSG00000030849|ENSMUSG00000017548|ENSMUSG00000004698|ENSMUSG00000019777|ENSMUSG00000024176|ENSMUSG00000015120|ENSMUSG00000063632|ENSMUSG00000049892|ENSMUSG00000024042|ENSMUSG00000060032|ENSMUSG00000014303|ENSMUSG00000036036|ENSMUSG00000019768|ENSMUSG00000026826|ENSMUSG00000022383|ENSMUSG00000037992|ENSMUSG00000055609|ENSMUSG00000027954|…	http://amigo.geneontology.org/cgi-bin/amigo/term_details?term=GO:1903507
transcriptional activator activity, RNA polymerase II transcription regulatory region sequence-specific binding	Gene Ontology	GO:0001228	40	312	4.45583e-05	0.00106331	ENSMUSG00000038718|ENSMUSG00000026826|ENSMUSG00000022383|ENSMUSG00000045680|ENSMUSG00000028023|ENSMUSG00000003032|ENSMUSG00000051510|ENSMUSG00000028341|ENSMUSG00000038402|ENSMUSG00000003154|ENSMUSG00000037025|ENSMUSG00000028639|ENSMUSG00000041459|ENSMUSG00000031681|ENSMUSG00000036144|ENSMUSG00000062563|ENSMUSG00000020656|ENSMUSG00000022286|ENSMUSG00000005583|ENSMUSG00000063632|ENSMUSG00000022335|…	http://amigo.geneontology.org/cgi-bin/amigo/term_details?term=GO:0001228
actin binding	Gene Ontology	GO:0003779	42	335	4.61844e-05	0.00109911	ENSMUSG00000020173|ENSMUSG00000040260|ENSMUSG00000006304|ENSMUSG00000063450|ENSMUSG00000033420|ENSMUSG00000028572|ENSMUSG00000031207|ENSMUSG00000022565|ENSMUSG00000052374|ENSMUSG00000016382|ENSMUSG00000049493|ENSMUSG00000034595|ENSMUSG00000026414|ENSMUSG00000025504|ENSMUSG00000037736|ENSMUSG00000061723|ENSMUSG00000042895|ENSMUSG00000063142|ENSMUSG00000009687|ENSMUSG00000069662|ENSMUSG00000054808|…	http://amigo.geneontology.org/cgi-bin/amigo/term_details?term=GO:0003779
positive regulation of MAPK cascade	Gene Ontology	GO:0043410	48	404	4.69377e-05	0.00111401	ENSMUSG00000031024|ENSMUSG00000048583|ENSMUSG00000036390|ENSMUSG00000053965|ENSMUSG00000022382|ENSMUSG00000037992|ENSMUSG00000020053|ENSMUSG00000064330|ENSMUSG00000040183|ENSMUSG00000030562|ENSMUSG00000025856|ENSMUSG00000027954|ENSMUSG00000021360|ENSMUSG00000005534|ENSMUSG00000024182|ENSMUSG00000031565|ENSMUSG00000004207|ENSMUSG00000030849|ENSMUSG00000041193|ENSMUSG00000045005|ENSMUSG00000031489|…	http://amigo.geneontology.org/cgi-bin/amigo/term_details?term=GO:0043410
response to abiotic stimulus	Gene Ontology	GO:0009628	75	733	4.84256e-05	0.00114443	ENSMUSG00000062252|ENSMUSG00000026826|ENSMUSG00000036390|ENSMUSG00000058793|ENSMUSG00000022383|ENSMUSG00000031489|ENSMUSG00000034023|ENSMUSG00000029553|ENSMUSG00000050511|ENSMUSG00000018566|ENSMUSG00000020300|ENSMUSG00000029016|ENSMUSG00000021264|ENSMUSG00000041974|ENSMUSG00000031302|ENSMUSG00000020053|ENSMUSG00000033685|ENSMUSG00000030657|ENSMUSG00000026576|ENSMUSG00000030094|ENSMUSG00000047557|…	http://amigo.geneontology.org/cgi-bin/amigo/term_details?term=GO:0009628
cell-cell signaling	Gene Ontology	GO:0007267	104	1108	4.84819e-05	0.00114443	ENSMUSG00000028023|ENSMUSG00000025856|ENSMUSG00000045005|ENSMUSG00000024873|ENSMUSG00000030849|ENSMUSG00000032336|ENSMUSG00000035621|ENSMUSG00000019777|ENSMUSG00000005583|ENSMUSG00000063632|ENSMUSG00000063142|ENSMUSG00000032356|ENSMUSG00000029524|ENSMUSG00000032826|ENSMUSG00000032497|ENSMUSG00000031883|ENSMUSG00000031075|ENSMUSG00000059327|ENSMUSG00000026825|ENSMUSG00000035828|ENSMUSG00000003032|…	http://amigo.geneontology.org/cgi-bin/amigo/term_details?term=GO:0007267
negative regulation of transcription from RNA polymerase II promoter	Gene Ontology	GO:0000122	69	658	4.8655e-05	0.00114542	ENSMUSG00000045680|ENSMUSG00000026826|ENSMUSG00000034165|ENSMUSG00000022383|ENSMUSG00000037992|ENSMUSG00000055609|ENSMUSG00000059325|ENSMUSG00000046709|ENSMUSG00000027954|ENSMUSG00000022895|ENSMUSG00000025025|ENSMUSG00000028341|ENSMUSG00000020472|ENSMUSG00000022528|ENSMUSG00000024914|ENSMUSG00000037025|ENSMUSG00000031565|ENSMUSG00000015837|ENSMUSG00000027833|ENSMUSG00000024513|ENSMUSG00000030849|…	http://amigo.geneontology.org/cgi-bin/amigo/term_details?term=GO:0000122
regulation of nervous system development	Gene Ontology	GO:0051960	80	797	4.96951e-05	0.00116677	ENSMUSG00000020027|ENSMUSG00000020173|ENSMUSG00000070509|ENSMUSG00000049313|ENSMUSG00000022382|ENSMUSG00000037992|ENSMUSG00000030110|ENSMUSG00000031548|ENSMUSG00000027833|ENSMUSG00000027954|ENSMUSG00000042211|ENSMUSG00000043051|ENSMUSG00000048904|ENSMUSG00000028782|ENSMUSG00000028519|ENSMUSG00000022528|ENSMUSG00000031302|ENSMUSG00000031565|ENSMUSG00000030084|ENSMUSG00000003233|ENSMUSG00000023328|…	http://amigo.geneontology.org/cgi-bin/amigo/term_details?term=GO:0051960
cell projection	Gene Ontology	GO:0042995	156	1815	5.00122e-05	0.00117106	ENSMUSG00000062252|ENSMUSG00000020300|ENSMUSG00000025856|ENSMUSG00000030110|ENSMUSG00000071072|ENSMUSG00000019278|ENSMUSG00000037242|ENSMUSG00000029203|ENSMUSG00000033335|ENSMUSG00000030847|ENSMUSG00000024270|ENSMUSG00000004591|ENSMUSG00000039450|ENSMUSG00000025504|ENSMUSG00000032336|ENSMUSG00000029291|ENSMUSG00000024175|ENSMUSG00000015120|ENSMUSG00000063142|ENSMUSG00000032356|ENSMUSG00000026812|…	http://amigo.geneontology.org/cgi-bin/amigo/term_details?term=GO:0042995
regulation of JUN kinase activity	Gene Ontology	GO:0043506	16	73	5.10596e-05	0.00119239	ENSMUSG00000031392|ENSMUSG00000024039|ENSMUSG00000031548|ENSMUSG00000015305|ENSMUSG00000033542|ENSMUSG00000027540|ENSMUSG00000061288|ENSMUSG00000027692|ENSMUSG00000022382|ENSMUSG00000004054|ENSMUSG00000003233|ENSMUSG00000026235|ENSMUSG00000026872|ENSMUSG00000024182|ENSMUSG00000045005|ENSMUSG00000052539	http://amigo.geneontology.org/cgi-bin/amigo/term_details?term=GO:0043506
cell-cell junction	Gene Ontology	GO:0005911	62	573	5.15554e-05	0.00120076	ENSMUSG00000020170|ENSMUSG00000033444|ENSMUSG00000057123|ENSMUSG00000027540|ENSMUSG00000028552|ENSMUSG00000033031|ENSMUSG00000031012|ENSMUSG00000016487|ENSMUSG00000022565|ENSMUSG00000000881|ENSMUSG00000037242|ENSMUSG00000022656|ENSMUSG00000028645|ENSMUSG00000031928|ENSMUSG00000025162|ENSMUSG00000026576|ENSMUSG00000000159|ENSMUSG00000045005|ENSMUSG00000030847|ENSMUSG00000024440|ENSMUSG00000004591|…	http://amigo.geneontology.org/cgi-bin/amigo/term_details?term=GO:0005911
core promoter sequence-specific DNA binding	Gene Ontology	GO:0001046	19	99	5.18776e-05	0.00120505	ENSMUSG00000026826|ENSMUSG00000056501|ENSMUSG00000058440|ENSMUSG00000076431|ENSMUSG00000025498|ENSMUSG00000021250|ENSMUSG00000039153|ENSMUSG00000019777|ENSMUSG00000031681|ENSMUSG00000017548|ENSMUSG00000066613|ENSMUSG00000019768|ENSMUSG00000028341|ENSMUSG00000078671|ENSMUSG00000048490|ENSMUSG00000024176|ENSMUSG00000005583|ENSMUSG00000063632|ENSMUSG00000023994	http://amigo.geneontology.org/cgi-bin/amigo/term_details?term=GO:0001046
transcription regulatory region sequence-specific DNA binding	Gene Ontology	GO:0000976	61	561	5.20453e-05	0.00120574	ENSMUSG00000038718|ENSMUSG00000026826|ENSMUSG00000036923|ENSMUSG00000022383|ENSMUSG00000014303|ENSMUSG00000037992|ENSMUSG00000021264|ENSMUSG00000028023|ENSMUSG00000022895|ENSMUSG00000022335|ENSMUSG00000056501|ENSMUSG00000028341|ENSMUSG00000038402|ENSMUSG00000003154|ENSMUSG00000037025|ENSMUSG00000043456|ENSMUSG00000024513|ENSMUSG00000024922|ENSMUSG00000028639|ENSMUSG00000048626|ENSMUSG00000031681|…	http://amigo.geneontology.org/cgi-bin/amigo/term_details?term=GO:0000976
positive regulation of MAP kinase activity	Gene Ontology	GO:0043406	25	156	5.43062e-05	0.00125479	ENSMUSG00000020170|ENSMUSG00000020053|ENSMUSG00000053965|ENSMUSG00000022382|ENSMUSG00000027540|ENSMUSG00000064330|ENSMUSG00000025856|ENSMUSG00000027954|ENSMUSG00000005534|ENSMUSG00000024182|ENSMUSG00000045005|ENSMUSG00000030562|ENSMUSG00000004054|ENSMUSG00000031565|ENSMUSG00000052539|ENSMUSG00000031392|ENSMUSG00000055737|ENSMUSG00000015305|ENSMUSG00000059146|ENSMUSG00000026872|ENSMUSG00000022982|…	http://amigo.geneontology.org/cgi-bin/amigo/term_details?term=GO:0043406
enzyme activator activity	Gene Ontology	GO:0008047	45	372	5.45786e-05	0.00125776	ENSMUSG00000048583|ENSMUSG00000024182|ENSMUSG00000032812|ENSMUSG00000006575|ENSMUSG00000026678|ENSMUSG00000029192|ENSMUSG00000003031|ENSMUSG00000036198|ENSMUSG00000028573|ENSMUSG00000032083|ENSMUSG00000025154|ENSMUSG00000024858|ENSMUSG00000003134|ENSMUSG00000004207|ENSMUSG00000026576|ENSMUSG00000032688|ENSMUSG00000036707|ENSMUSG00000001768|ENSMUSG00000002985|ENSMUSG00000020130|ENSMUSG00000004952|…	http://amigo.geneontology.org/cgi-bin/amigo/term_details?term=GO:0008047
negative regulation of developmental process	Gene Ontology	GO:0051093	79	787	5.5211e-05	0.00126898	ENSMUSG00000004698|ENSMUSG00000020027|ENSMUSG00000023367|ENSMUSG00000070509|ENSMUSG00000022383|ENSMUSG00000022382|ENSMUSG00000037992|ENSMUSG00000020053|ENSMUSG00000059325|ENSMUSG00000027954|ENSMUSG00000003032|ENSMUSG00000003031|ENSMUSG00000028782|ENSMUSG00000028519|ENSMUSG00000022528|ENSMUSG00000031302|ENSMUSG00000031565|ENSMUSG00000027803|ENSMUSG00000043456|ENSMUSG00000031785|ENSMUSG00000030657|…	http://amigo.geneontology.org/cgi-bin/amigo/term_details?term=GO:0051093
cellular protein localization	Gene Ontology	GO:0034613	118	1299	5.54323e-05	0.00127072	ENSMUSG00000030216|ENSMUSG00000027540|ENSMUSG00000023923|ENSMUSG00000059327|ENSMUSG00000029192|ENSMUSG00000031586|ENSMUSG00000020696|ENSMUSG00000041974|ENSMUSG00000045005|ENSMUSG00000023286|ENSMUSG00000010517|ENSMUSG00000066232|ENSMUSG00000030595|ENSMUSG00000029291|ENSMUSG00000025266|ENSMUSG00000029524|ENSMUSG00000032826|ENSMUSG00000040250|ENSMUSG00000030470|ENSMUSG00000034435|ENSMUSG00000001855|…	http://amigo.geneontology.org/cgi-bin/amigo/term_details?term=GO:0034613
transcription factor activity, RNA polymerase II core promoter proximal region sequence-specific binding	Gene Ontology	GO:0000982	41	327	5.64652e-05	0.00129101	ENSMUSG00000026826|ENSMUSG00000022383|ENSMUSG00000021264|ENSMUSG00000028023|ENSMUSG00000022895|ENSMUSG00000056501|ENSMUSG00000028341|ENSMUSG00000045680|ENSMUSG00000003154|ENSMUSG00000037025|ENSMUSG00000043456|ENSMUSG00000024922|ENSMUSG00000028639|ENSMUSG00000048626|ENSMUSG00000031681|ENSMUSG00000036144|ENSMUSG00000017007|ENSMUSG00000062563|ENSMUSG00000020656|ENSMUSG00000005583|ENSMUSG00000063632|…	http://amigo.geneontology.org/cgi-bin/amigo/term_details?term=GO:0000982
ubiquitin-like protein ligase binding	Gene Ontology	GO:0044389	35	261	5.8358e-05	0.00133081	ENSMUSG00000090213|ENSMUSG00000078923|ENSMUSG00000020696|ENSMUSG00000056501|ENSMUSG00000015837|ENSMUSG00000000881|ENSMUSG00000045005|ENSMUSG00000029203|ENSMUSG00000023286|ENSMUSG00000032010|ENSMUSG00000032405|ENSMUSG00000032501|ENSMUSG00000024039|ENSMUSG00000010517|ENSMUSG00000001270|ENSMUSG00000021025|ENSMUSG00000020893|ENSMUSG00000026637|ENSMUSG00000039159|ENSMUSG00000030083|ENSMUSG00000030161|…	http://amigo.geneontology.org/cgi-bin/amigo/term_details?term=GO:0044389
regulation of response to cytokine stimulus	Gene Ontology	GO:0060759	16	74	5.87782e-05	0.0013369	ENSMUSG00000031392|ENSMUSG00000007655|ENSMUSG00000025498|ENSMUSG00000048249|ENSMUSG00000003184|ENSMUSG00000003032|ENSMUSG00000021678|ENSMUSG00000020696|ENSMUSG00000031558|ENSMUSG00000061878|ENSMUSG00000032083|ENSMUSG00000023992|ENSMUSG00000020227|ENSMUSG00000026073|ENSMUSG00000029203|ENSMUSG00000014776	http://amigo.geneontology.org/cgi-bin/amigo/term_details?term=GO:0060759
regulation of neuron differentiation	Gene Ontology	GO:0045664	62	576	5.90804e-05	0.00134028	ENSMUSG00000020027|ENSMUSG00000020173|ENSMUSG00000070509|ENSMUSG00000037992|ENSMUSG00000030110|ENSMUSG00000031548|ENSMUSG00000027833|ENSMUSG00000027954|ENSMUSG00000042211|ENSMUSG00000048904|ENSMUSG00000028519|ENSMUSG00000022528|ENSMUSG00000031302|ENSMUSG00000031565|ENSMUSG00000030084|ENSMUSG00000023328|ENSMUSG00000030657|ENSMUSG00000043456|ENSMUSG00000001627|ENSMUSG00000043051|ENSMUSG00000028176|…	http://amigo.geneontology.org/cgi-bin/amigo/term_details?term=GO:0045664
carbohydrate derivative metabolic process	Gene Ontology	GO:1901135	84	854	6.17548e-05	0.00139732	ENSMUSG00000020053|ENSMUSG00000030217|ENSMUSG00000022383|ENSMUSG00000031489|ENSMUSG00000020431|ENSMUSG00000006575|ENSMUSG00000053965|ENSMUSG00000021712|ENSMUSG00000045205|ENSMUSG00000055401|ENSMUSG00000023964|ENSMUSG00000034842|ENSMUSG00000032122|ENSMUSG00000021360|ENSMUSG00000063889|ENSMUSG00000005534|ENSMUSG00000036197|ENSMUSG00000030657|ENSMUSG00000003072|ENSMUSG00000030651|ENSMUSG00000045211|…	http://amigo.geneontology.org/cgi-bin/amigo/term_details?term=GO:1901135
regulation of cell development	Gene Ontology	GO:0060284	85	868	6.43093e-05	0.00145136	ENSMUSG00000004698|ENSMUSG00000020027|ENSMUSG00000020173|ENSMUSG00000002546|ENSMUSG00000049313|ENSMUSG00000022382|ENSMUSG00000037992|ENSMUSG00000030110|ENSMUSG00000070509|ENSMUSG00000027833|ENSMUSG00000027954|ENSMUSG00000042211|ENSMUSG00000043051|ENSMUSG00000048904|ENSMUSG00000043456|ENSMUSG00000021360|ENSMUSG00000028519|ENSMUSG00000032083|ENSMUSG00000022528|ENSMUSG00000031302|ENSMUSG00000031565|…	http://amigo.geneontology.org/cgi-bin/amigo/term_details?term=GO:0060284
cytoskeletal part	Gene Ontology	GO:0044430	110	1197	6.50078e-05	0.00146335	ENSMUSG00000036923|ENSMUSG00000016528|ENSMUSG00000071072|ENSMUSG00000030562|ENSMUSG00000033335|ENSMUSG00000032782|ENSMUSG00000028933|ENSMUSG00000026414|ENSMUSG00000024277|ENSMUSG00000004591|ENSMUSG00000025006|ENSMUSG00000039450|ENSMUSG00000024175|ENSMUSG00000024049|ENSMUSG00000030161|ENSMUSG00000037962|ENSMUSG00000021693|ENSMUSG00000027550|ENSMUSG00000075701|ENSMUSG00000027394|ENSMUSG00000044534|…	http://amigo.geneontology.org/cgi-bin/amigo/term_details?term=GO:0044430
JNK cascade	Gene Ontology	GO:0007254	25	158	6.51937e-05	0.00146376	ENSMUSG00000036390|ENSMUSG00000022382|ENSMUSG00000027540|ENSMUSG00000040183|ENSMUSG00000024182|ENSMUSG00000045005|ENSMUSG00000052539|ENSMUSG00000004054|ENSMUSG00000032501|ENSMUSG00000024039|ENSMUSG00000020893|ENSMUSG00000031392|ENSMUSG00000046709|ENSMUSG00000015305|ENSMUSG00000021678|ENSMUSG00000027692|ENSMUSG00000026872|ENSMUSG00000027598|ENSMUSG00000033542|ENSMUSG00000061288|ENSMUSG00000031548|…	http://amigo.geneontology.org/cgi-bin/amigo/term_details?term=GO:0007254
protein complex assembly	Gene Ontology	GO:0006461	99	1052	6.72175e-05	0.00150148	ENSMUSG00000026491|ENSMUSG00000030218|ENSMUSG00000058624|ENSMUSG00000041974|ENSMUSG00000029203|ENSMUSG00000033335|ENSMUSG00000026414|ENSMUSG00000061175|ENSMUSG00000039450|ENSMUSG00000004814|ENSMUSG00000063142|ENSMUSG00000060038|ENSMUSG00000026812|ENSMUSG00000022353|ENSMUSG00000075705|ENSMUSG00000028745|ENSMUSG00000002546|ENSMUSG00000028832|ENSMUSG00000001416|ENSMUSG00000032489|ENSMUSG00000006304|…	http://amigo.geneontology.org/cgi-bin/amigo/term_details?term=GO:0006461
protein complex biogenesis	Gene Ontology	GO:0070271	99	1052	6.72175e-05	0.00150148	ENSMUSG00000026491|ENSMUSG00000030218|ENSMUSG00000058624|ENSMUSG00000041974|ENSMUSG00000029203|ENSMUSG00000033335|ENSMUSG00000026414|ENSMUSG00000061175|ENSMUSG00000039450|ENSMUSG00000004814|ENSMUSG00000063142|ENSMUSG00000060038|ENSMUSG00000026812|ENSMUSG00000022353|ENSMUSG00000075705|ENSMUSG00000028745|ENSMUSG00000002546|ENSMUSG00000028832|ENSMUSG00000001416|ENSMUSG00000032489|ENSMUSG00000006304|…	http://amigo.geneontology.org/cgi-bin/amigo/term_details?term=GO:0070271
neuron differentiation	Gene Ontology	GO:0030182	106	1145	6.77755e-05	0.00151008	ENSMUSG00000029510|ENSMUSG00000062252|ENSMUSG00000055003|ENSMUSG00000042211|ENSMUSG00000028341|ENSMUSG00000030110|ENSMUSG00000029207|ENSMUSG00000020454|ENSMUSG00000033335|ENSMUSG00000030849|ENSMUSG00000029291|ENSMUSG00000019777|ENSMUSG00000024176|ENSMUSG00000005583|ENSMUSG00000063632|ENSMUSG00000063142|ENSMUSG00000032356|ENSMUSG00000017485|ENSMUSG00000059146|ENSMUSG00000027394|ENSMUSG00000031734|…	http://amigo.geneontology.org/cgi-bin/amigo/term_details?term=GO:0030182
neural tube formation	Gene Ontology	GO:0001841	20	111	7.23263e-05	0.00160737	ENSMUSG00000026812|ENSMUSG00000019979|ENSMUSG00000021466|ENSMUSG00000076431|ENSMUSG00000037992|ENSMUSG00000007880|ENSMUSG00000031548|ENSMUSG00000029381|ENSMUSG00000050288|ENSMUSG00000047407|ENSMUSG00000058886|ENSMUSG00000020173|ENSMUSG00000026872|ENSMUSG00000039765|ENSMUSG00000070509|ENSMUSG00000060733|ENSMUSG00000022286|ENSMUSG00000003233|ENSMUSG00000063632|ENSMUSG00000036180	http://amigo.geneontology.org/cgi-bin/amigo/term_details?term=GO:0001841
cellular response to endogenous stimulus	Gene Ontology	GO:0071495	84	859	7.40859e-05	0.0016423	ENSMUSG00000020170|ENSMUSG00000048583|ENSMUSG00000029096|ENSMUSG00000020300|ENSMUSG00000024182|ENSMUSG00000021360|ENSMUSG00000022383|ENSMUSG00000020027|ENSMUSG00000037992|ENSMUSG00000020108|ENSMUSG00000026826|ENSMUSG00000070509|ENSMUSG00000018566|ENSMUSG00000034165|ENSMUSG00000056501|ENSMUSG00000028341|ENSMUSG00000022528|ENSMUSG00000071072|ENSMUSG00000042377|ENSMUSG00000029335|ENSMUSG00000031565|…	http://amigo.geneontology.org/cgi-bin/amigo/term_details?term=GO:0071495
monovalent inorganic cation transport	Gene Ontology	GO:0015672	44	366	7.47551e-05	0.00165294	ENSMUSG00000057123|ENSMUSG00000020261|ENSMUSG00000028238|ENSMUSG00000019210|ENSMUSG00000003072|ENSMUSG00000019558|ENSMUSG00000033335|ENSMUSG00000026576|ENSMUSG00000033998|ENSMUSG00000079056|ENSMUSG00000027523|ENSMUSG00000028631|ENSMUSG00000014077|ENSMUSG00000078532|ENSMUSG00000007107|ENSMUSG00000020893|ENSMUSG00000063142|ENSMUSG00000009687|ENSMUSG00000027574|ENSMUSG00000021135|ENSMUSG00000026812|…	http://amigo.geneontology.org/cgi-bin/amigo/term_details?term=GO:0015672
cellular macromolecule localization	Gene Ontology	GO:0070727	118	1310	7.66455e-05	0.00169046	ENSMUSG00000030216|ENSMUSG00000027540|ENSMUSG00000023923|ENSMUSG00000059327|ENSMUSG00000029192|ENSMUSG00000031586|ENSMUSG00000020696|ENSMUSG00000041974|ENSMUSG00000045005|ENSMUSG00000023286|ENSMUSG00000010517|ENSMUSG00000066232|ENSMUSG00000030595|ENSMUSG00000029291|ENSMUSG00000025266|ENSMUSG00000029524|ENSMUSG00000032826|ENSMUSG00000040250|ENSMUSG00000030470|ENSMUSG00000034435|ENSMUSG00000001855|…	http://amigo.geneontology.org/cgi-bin/amigo/term_details?term=GO:0070727
core promoter binding	Gene Ontology	GO:0001047	24	150	7.75705e-05	0.00170655	ENSMUSG00000026826|ENSMUSG00000036390|ENSMUSG00000003032|ENSMUSG00000056501|ENSMUSG00000028341|ENSMUSG00000031681|ENSMUSG00000017548|ENSMUSG00000078671|ENSMUSG00000019777|ENSMUSG00000024176|ENSMUSG00000005583|ENSMUSG00000063632|ENSMUSG00000019768|ENSMUSG00000076431|ENSMUSG00000021250|ENSMUSG00000039153|ENSMUSG00000058440|ENSMUSG00000025498|ENSMUSG00000066613|ENSMUSG00000041530|ENSMUSG00000048490|…	http://amigo.geneontology.org/cgi-bin/amigo/term_details?term=GO:0001047
neuron projection	Gene Ontology	GO:0043005	95	1005	8.10693e-05	0.00177904	ENSMUSG00000020300|ENSMUSG00000030110|ENSMUSG00000024873|ENSMUSG00000033335|ENSMUSG00000030847|ENSMUSG00000032336|ENSMUSG00000029291|ENSMUSG00000070509|ENSMUSG00000015120|ENSMUSG00000063142|ENSMUSG00000032356|ENSMUSG00000026812|ENSMUSG00000022791|ENSMUSG00000028402|ENSMUSG00000026825|ENSMUSG00000041347|ENSMUSG00000054477|ENSMUSG00000028745|ENSMUSG00000040407|ENSMUSG00000019768|ENSMUSG00000028832|…	http://amigo.geneontology.org/cgi-bin/amigo/term_details?term=GO:0043005
negative regulation of cell differentiation	Gene Ontology	GO:0045596	62	585	8.81174e-05	0.00192887	ENSMUSG00000031691|ENSMUSG00000022383|ENSMUSG00000022382|ENSMUSG00000037992|ENSMUSG00000020053|ENSMUSG00000059325|ENSMUSG00000027954|ENSMUSG00000021466|ENSMUSG00000028519|ENSMUSG00000022528|ENSMUSG00000031302|ENSMUSG00000031565|ENSMUSG00000043456|ENSMUSG00000031785|ENSMUSG00000030657|ENSMUSG00000037296|ENSMUSG00000028639|ENSMUSG00000026288|ENSMUSG00000001627|ENSMUSG00000023367|ENSMUSG00000049556|…	http://amigo.geneontology.org/cgi-bin/amigo/term_details?term=GO:0045596
integral component of membrane	Gene Ontology	GO:0016021	318	4188	8.87019e-05	0.00193681	ENSMUSG00000068732|ENSMUSG00000062252|ENSMUSG00000027884|ENSMUSG00000030217|ENSMUSG00000050395|ENSMUSG00000060227|ENSMUSG00000021135|ENSMUSG00000009035|ENSMUSG00000005514|ENSMUSG00000055003|ENSMUSG00000030351|ENSMUSG00000031105|ENSMUSG00000033152|ENSMUSG00000027341|ENSMUSG00000050558|ENSMUSG00000021265|ENSMUSG00000030110|ENSMUSG00000078681|ENSMUSG00000022056|ENSMUSG00000037242|ENSMUSG00000026235|…	http://amigo.geneontology.org/cgi-bin/amigo/term_details?term=GO:0016021
negative regulation of MAPK cascade	Gene Ontology	GO:0043409	22	132	8.97356e-05	0.00195449	ENSMUSG00000029410|ENSMUSG00000049313|ENSMUSG00000027540|ENSMUSG00000003032|ENSMUSG00000038546|ENSMUSG00000002985|ENSMUSG00000024427|ENSMUSG00000020227|ENSMUSG00000020893|ENSMUSG00000032171|ENSMUSG00000020053|ENSMUSG00000021678|ENSMUSG00000037211|ENSMUSG00000045671|ENSMUSG00000029657|ENSMUSG00000027598|ENSMUSG00000029223|ENSMUSG00000061288|ENSMUSG00000031548|ENSMUSG00000025665|ENSMUSG00000021156|…	http://amigo.geneontology.org/cgi-bin/amigo/term_details?term=GO:0043409
organophosphate metabolic process	Gene Ontology	GO:0019637	77	775	9.2396e-05	0.00200743	ENSMUSG00000001891|ENSMUSG00000058793|ENSMUSG00000022383|ENSMUSG00000031489|ENSMUSG00000020431|ENSMUSG00000006575|ENSMUSG00000053965|ENSMUSG00000025856|ENSMUSG00000026737|ENSMUSG00000030759|ENSMUSG00000004789|ENSMUSG00000023964|ENSMUSG00000032122|ENSMUSG00000029055|ENSMUSG00000032083|ENSMUSG00000005534|ENSMUSG00000003072|ENSMUSG00000030651|ENSMUSG00000045211|ENSMUSG00000027584|ENSMUSG00000025630|…	http://amigo.geneontology.org/cgi-bin/amigo/term_details?term=GO:0019637
inner ear development	Gene Ontology	GO:0048839	25	162	9.30071e-05	0.00201569	ENSMUSG00000062252|ENSMUSG00000036923|ENSMUSG00000028341|ENSMUSG00000048904|ENSMUSG00000016528|ENSMUSG00000022528|ENSMUSG00000031565|ENSMUSG00000037016|ENSMUSG00000030849|ENSMUSG00000029821|ENSMUSG00000028631|ENSMUSG00000028654|ENSMUSG00000062563|ENSMUSG00000063142|ENSMUSG00000020053|ENSMUSG00000027966|ENSMUSG00000050288|ENSMUSG00000031603|ENSMUSG00000022982|ENSMUSG00000003233|ENSMUSG00000015134|…	http://amigo.geneontology.org/cgi-bin/amigo/term_details?term=GO:0048839
ubiquitin protein ligase binding	Gene Ontology	GO:0031625	34	257	9.36308e-05	0.00202237	ENSMUSG00000090213|ENSMUSG00000078923|ENSMUSG00000020696|ENSMUSG00000015837|ENSMUSG00000000881|ENSMUSG00000045005|ENSMUSG00000029203|ENSMUSG00000023286|ENSMUSG00000032010|ENSMUSG00000032405|ENSMUSG00000032501|ENSMUSG00000024039|ENSMUSG00000010517|ENSMUSG00000001270|ENSMUSG00000021025|ENSMUSG00000020893|ENSMUSG00000026637|ENSMUSG00000039159|ENSMUSG00000030083|ENSMUSG00000030161|ENSMUSG00000026663|…	http://amigo.geneontology.org/cgi-bin/amigo/term_details?term=GO:0031625
cell junction	Gene Ontology	GO:0030054	112	1236	9.38692e-05	0.00202237	ENSMUSG00000053198|ENSMUSG00000027540|ENSMUSG00000003970|ENSMUSG00000016487|ENSMUSG00000022565|ENSMUSG00000030562|ENSMUSG00000024873|ENSMUSG00000033335|ENSMUSG00000030847|ENSMUSG00000004591|ENSMUSG00000025006|ENSMUSG00000025504|ENSMUSG00000039457|ENSMUSG00000029291|ENSMUSG00000052539|ENSMUSG00000054808|ENSMUSG00000032826|ENSMUSG00000024043|ENSMUSG00000005320|ENSMUSG00000022791|ENSMUSG00000028402|…	http://amigo.geneontology.org/cgi-bin/amigo/term_details?term=GO:0030054
regulation of cytokine-mediated signaling pathway	Gene Ontology	GO:0001959	15	69	9.40098e-05	0.00202237	ENSMUSG00000031392|ENSMUSG00000007655|ENSMUSG00000025498|ENSMUSG00000048249|ENSMUSG00000003184|ENSMUSG00000021678|ENSMUSG00000020696|ENSMUSG00000031558|ENSMUSG00000061878|ENSMUSG00000032083|ENSMUSG00000023992|ENSMUSG00000020227|ENSMUSG00000026073|ENSMUSG00000029203|ENSMUSG00000014776	http://amigo.geneontology.org/cgi-bin/amigo/term_details?term=GO:0001959
positive regulation of developmental process	Gene Ontology	GO:0051094	108	1183	9.59422e-05	0.00205887	ENSMUSG00000048583|ENSMUSG00000055003|ENSMUSG00000059325|ENSMUSG00000025856|ENSMUSG00000042211|ENSMUSG00000036923|ENSMUSG00000030110|ENSMUSG00000033335|ENSMUSG00000030849|ENSMUSG00000028933|ENSMUSG00000029291|ENSMUSG00000004814|ENSMUSG00000024176|ENSMUSG00000005583|ENSMUSG00000063632|ENSMUSG00000059146|ENSMUSG00000005320|ENSMUSG00000056770|ENSMUSG00000030470|ENSMUSG00000005514|ENSMUSG00000002546|…	http://amigo.geneontology.org/cgi-bin/amigo/term_details?term=GO:0051094
protein polymerization	Gene Ontology	GO:0051258	29	204	9.88991e-05	0.00211194	ENSMUSG00000026825|ENSMUSG00000020173|ENSMUSG00000006304|ENSMUSG00000021573|ENSMUSG00000058624|ENSMUSG00000003031|ENSMUSG00000029203|ENSMUSG00000018411|ENSMUSG00000029621|ENSMUSG00000033335|ENSMUSG00000049550|ENSMUSG00000004814|ENSMUSG00000021338|ENSMUSG00000029465|ENSMUSG00000039621|ENSMUSG00000025162|ENSMUSG00000075705|ENSMUSG00000031558|ENSMUSG00000056367|ENSMUSG00000022353|ENSMUSG00000028745|…	http://amigo.geneontology.org/cgi-bin/amigo/term_details?term=GO:0051258
stress-activated protein kinase signaling cascade	Gene Ontology	GO:0031098	29	204	9.88991e-05	0.00211194	ENSMUSG00000036390|ENSMUSG00000022382|ENSMUSG00000027540|ENSMUSG00000040183|ENSMUSG00000016528|ENSMUSG00000024182|ENSMUSG00000045005|ENSMUSG00000052539|ENSMUSG00000001642|ENSMUSG00000004054|ENSMUSG00000032501|ENSMUSG00000024039|ENSMUSG00000020893|ENSMUSG00000031392|ENSMUSG00000046709|ENSMUSG00000015305|ENSMUSG00000021678|ENSMUSG00000027692|ENSMUSG00000026872|ENSMUSG00000029657|ENSMUSG00000027598|…	http://amigo.geneontology.org/cgi-bin/amigo/term_details?term=GO:0031098
regulation of cell morphogenesis involved in differentiation	Gene Ontology	GO:0010769	40	325	9.9143e-05	0.00211199	ENSMUSG00000031548|ENSMUSG00000006304|ENSMUSG00000030110|ENSMUSG00000027954|ENSMUSG00000033174|ENSMUSG00000054808|ENSMUSG00000021360|ENSMUSG00000028519|ENSMUSG00000032083|ENSMUSG00000031302|ENSMUSG00000027833|ENSMUSG00000018411|ENSMUSG00000033335|ENSMUSG00000001627|ENSMUSG00000043051|ENSMUSG00000023328|ENSMUSG00000038708|ENSMUSG00000029291|ENSMUSG00000019777|ENSMUSG00000022018|ENSMUSG00000021338|…	http://amigo.geneontology.org/cgi-bin/amigo/term_details?term=GO:0010769
regulation of cell morphogenesis	Gene Ontology	GO:0022604	55	502	9.97605e-05	0.00211997	ENSMUSG00000002546|ENSMUSG00000070509|ENSMUSG00000032812|ENSMUSG00000006304|ENSMUSG00000030110|ENSMUSG00000031548|ENSMUSG00000029381|ENSMUSG00000033174|ENSMUSG00000034868|ENSMUSG00000021360|ENSMUSG00000028519|ENSMUSG00000032083|ENSMUSG00000031302|ENSMUSG00000031310|ENSMUSG00000027833|ENSMUSG00000018411|ENSMUSG00000025162|ENSMUSG00000033335|ENSMUSG00000001627|ENSMUSG00000043051|ENSMUSG00000023328|…	http://amigo.geneontology.org/cgi-bin/amigo/term_details?term=GO:0022604
regulation of JNK cascade	Gene Ontology	GO:0046328	23	143	0.000101069	0.00214256	ENSMUSG00000036390|ENSMUSG00000022382|ENSMUSG00000027540|ENSMUSG00000040183|ENSMUSG00000003233|ENSMUSG00000045005|ENSMUSG00000052539|ENSMUSG00000004054|ENSMUSG00000024039|ENSMUSG00000020893|ENSMUSG00000031392|ENSMUSG00000015305|ENSMUSG00000021678|ENSMUSG00000027692|ENSMUSG00000026872|ENSMUSG00000027598|ENSMUSG00000033542|ENSMUSG00000061288|ENSMUSG00000031548|ENSMUSG00000024182|ENSMUSG00000026235|…	http://amigo.geneontology.org/cgi-bin/amigo/term_details?term=GO:0046328
negative regulation of apoptotic process	Gene Ontology	GO:0043066	75	752	0.000101809	0.00215302	ENSMUSG00000020053|ENSMUSG00000026826|ENSMUSG00000020300|ENSMUSG00000037992|ENSMUSG00000009670|ENSMUSG00000009291|ENSMUSG00000027954|ENSMUSG00000029304|ENSMUSG00000089989|ENSMUSG00000003032|ENSMUSG00000020696|ENSMUSG00000056501|ENSMUSG00000028341|ENSMUSG00000026778|ENSMUSG00000029207|ENSMUSG00000019278|ENSMUSG00000033685|ENSMUSG00000031928|ENSMUSG00000022200|ENSMUSG00000041354|ENSMUSG00000028639|…	http://amigo.geneontology.org/cgi-bin/amigo/term_details?term=GO:0043066
regulation of cellular response to stress	Gene Ontology	GO:0080135	52	467	0.000105887	0.00223177	ENSMUSG00000036390|ENSMUSG00000022382|ENSMUSG00000027540|ENSMUSG00000052144|ENSMUSG00000009291|ENSMUSG00000003032|ENSMUSG00000028341|ENSMUSG00000041974|ENSMUSG00000038685|ENSMUSG00000030657|ENSMUSG00000045005|ENSMUSG00000024182|ENSMUSG00000026235|ENSMUSG00000004207|ENSMUSG00000043613|ENSMUSG00000022307|ENSMUSG00000004054|ENSMUSG00000024039|ENSMUSG00000028999|ENSMUSG00000040435|ENSMUSG00000070509|…	http://amigo.geneontology.org/cgi-bin/amigo/term_details?term=GO:0080135
cell-cell adherens junction	Gene Ontology	GO:0005913	36	281	0.000106043	0.00223177	ENSMUSG00000027540|ENSMUSG00000028552|ENSMUSG00000033031|ENSMUSG00000016487|ENSMUSG00000022565|ENSMUSG00000022656|ENSMUSG00000031928|ENSMUSG00000025162|ENSMUSG00000030847|ENSMUSG00000004591|ENSMUSG00000025006|ENSMUSG00000062300|ENSMUSG00000025504|ENSMUSG00000039457|ENSMUSG00000031788|ENSMUSG00000021282|ENSMUSG00000058835|ENSMUSG00000029407|ENSMUSG00000038366|ENSMUSG00000024941|ENSMUSG00000051695|…	http://amigo.geneontology.org/cgi-bin/amigo/term_details?term=GO:0005913
negative regulation of RNA metabolic process	Gene Ontology	GO:0051253	91	961	0.000107821	0.00226373	ENSMUSG00000059325|ENSMUSG00000028341|ENSMUSG00000021264|ENSMUSG00000030849|ENSMUSG00000017548|ENSMUSG00000004698|ENSMUSG00000019777|ENSMUSG00000024176|ENSMUSG00000015120|ENSMUSG00000063632|ENSMUSG00000049892|ENSMUSG00000024042|ENSMUSG00000060032|ENSMUSG00000014303|ENSMUSG00000036036|ENSMUSG00000019768|ENSMUSG00000026826|ENSMUSG00000022383|ENSMUSG00000037992|ENSMUSG00000055609|ENSMUSG00000027954|…	http://amigo.geneontology.org/cgi-bin/amigo/term_details?term=GO:0051253
muscle tissue development	Gene Ontology	GO:0060537	43	361	0.000108126	0.00226468	ENSMUSG00000020053|ENSMUSG00000057123|ENSMUSG00000037992|ENSMUSG00000028023|ENSMUSG00000038256|ENSMUSG00000045680|ENSMUSG00000041975|ENSMUSG00000045414|ENSMUSG00000031565|ENSMUSG00000027833|ENSMUSG00000030849|ENSMUSG00000007880|ENSMUSG00000026414|ENSMUSG00000001627|ENSMUSG00000019942|ENSMUSG00000031681|ENSMUSG00000036144|ENSMUSG00000030562|ENSMUSG00000031626|ENSMUSG00000004698|ENSMUSG00000019777|…	http://amigo.geneontology.org/cgi-bin/amigo/term_details?term=GO:0060537
polymeric cytoskeletal fiber	Gene Ontology	GO:0099513	58	541	0.000111262	0.00231925	ENSMUSG00000072825|ENSMUSG00000033444|ENSMUSG00000019942|ENSMUSG00000019359|ENSMUSG00000032489|ENSMUSG00000063077|ENSMUSG00000034706|ENSMUSG00000021573|ENSMUSG00000043051|ENSMUSG00000027457|ENSMUSG00000030161|ENSMUSG00000028572|ENSMUSG00000071072|ENSMUSG00000020911|ENSMUSG00000016382|ENSMUSG00000018411|ENSMUSG00000025162|ENSMUSG00000030554|ENSMUSG00000045545|ENSMUSG00000026288|ENSMUSG00000054889|…	http://amigo.geneontology.org/cgi-bin/amigo/term_details?term=GO:0099513
supramolecular fiber	Gene Ontology	GO:0099512	58	541	0.000111262	0.00231925	ENSMUSG00000072825|ENSMUSG00000033444|ENSMUSG00000019942|ENSMUSG00000019359|ENSMUSG00000032489|ENSMUSG00000063077|ENSMUSG00000034706|ENSMUSG00000021573|ENSMUSG00000043051|ENSMUSG00000027457|ENSMUSG00000030161|ENSMUSG00000028572|ENSMUSG00000071072|ENSMUSG00000020911|ENSMUSG00000016382|ENSMUSG00000018411|ENSMUSG00000025162|ENSMUSG00000030554|ENSMUSG00000045545|ENSMUSG00000026288|ENSMUSG00000054889|…	http://amigo.geneontology.org/cgi-bin/amigo/term_details?term=GO:0099512
regulation of response to external stimulus	Gene Ontology	GO:0032101	67	653	0.000111844	0.00232581	ENSMUSG00000029417|ENSMUSG00000048373|ENSMUSG00000070509|ENSMUSG00000022383|ENSMUSG00000059325|ENSMUSG00000025856|ENSMUSG00000033174|ENSMUSG00000002897|ENSMUSG00000032083|ENSMUSG00000031443|ENSMUSG00000030657|ENSMUSG00000031565|ENSMUSG00000020823|ENSMUSG00000024063|ENSMUSG00000057337|ENSMUSG00000026576|ENSMUSG00000042265|ENSMUSG00000049130|ENSMUSG00000041193|ENSMUSG00000053965|ENSMUSG00000028635|…	http://amigo.geneontology.org/cgi-bin/amigo/term_details?term=GO:0032101
positive regulation of kinase activity	Gene Ontology	GO:0033674	43	362	0.000114305	0.00237136	ENSMUSG00000020170|ENSMUSG00000020053|ENSMUSG00000036390|ENSMUSG00000050395|ENSMUSG00000022382|ENSMUSG00000027540|ENSMUSG00000064330|ENSMUSG00000053965|ENSMUSG00000025856|ENSMUSG00000027954|ENSMUSG00000003031|ENSMUSG00000028519|ENSMUSG00000005534|ENSMUSG00000024182|ENSMUSG00000045005|ENSMUSG00000031928|ENSMUSG00000032688|ENSMUSG00000036707|ENSMUSG00000031565|ENSMUSG00000027829|ENSMUSG00000036923|…	http://amigo.geneontology.org/cgi-bin/amigo/term_details?term=GO:0033674
protein localization to nucleus	Gene Ontology	GO:0034504	39	317	0.000121249	0.00250945	ENSMUSG00000061878|ENSMUSG00000020053|ENSMUSG00000059208|ENSMUSG00000063450|ENSMUSG00000009291|ENSMUSG00000059327|ENSMUSG00000050511|ENSMUSG00000031586|ENSMUSG00000014776|ENSMUSG00000022528|ENSMUSG00000045969|ENSMUSG00000019942|ENSMUSG00000045733|ENSMUSG00000010517|ENSMUSG00000042895|ENSMUSG00000066232|ENSMUSG00000026778|ENSMUSG00000014077|ENSMUSG00000030595|ENSMUSG00000021025|ENSMUSG00000032171|…	http://amigo.geneontology.org/cgi-bin/amigo/term_details?term=GO:0034504
mitotic cell cycle phase transition	Gene Ontology	GO:0044772	34	261	0.000122275	0.0025247	ENSMUSG00000036923|ENSMUSG00000030094|ENSMUSG00000048904|ENSMUSG00000057469|ENSMUSG00000034683|ENSMUSG00000002871|ENSMUSG00000031928|ENSMUSG00000078429|ENSMUSG00000029022|ENSMUSG00000030649|ENSMUSG00000019942|ENSMUSG00000032405|ENSMUSG00000020653|ENSMUSG00000028999|ENSMUSG00000026778|ENSMUSG00000022750|ENSMUSG00000028821|ENSMUSG00000022018|ENSMUSG00000028212|ENSMUSG00000076431|ENSMUSG00000031490|…	http://amigo.geneontology.org/cgi-bin/amigo/term_details?term=GO:0044772
regulation of neurogenesis	Gene Ontology	GO:0050767	71	706	0.000123143	0.0025357	ENSMUSG00000020027|ENSMUSG00000020173|ENSMUSG00000070509|ENSMUSG00000049313|ENSMUSG00000022382|ENSMUSG00000037992|ENSMUSG00000030110|ENSMUSG00000031548|ENSMUSG00000027833|ENSMUSG00000027954|ENSMUSG00000042211|ENSMUSG00000043051|ENSMUSG00000048904|ENSMUSG00000028519|ENSMUSG00000022528|ENSMUSG00000031302|ENSMUSG00000031565|ENSMUSG00000030084|ENSMUSG00000023328|ENSMUSG00000030657|ENSMUSG00000043456|…	http://amigo.geneontology.org/cgi-bin/amigo/term_details?term=GO:0050767
adherens junction	Gene Ontology	GO:0005912	60	568	0.000123388	0.0025357	ENSMUSG00000033335|ENSMUSG00000034165|ENSMUSG00000006304|ENSMUSG00000027540|ENSMUSG00000063450|ENSMUSG00000003970|ENSMUSG00000028552|ENSMUSG00000033031|ENSMUSG00000031012|ENSMUSG00000016487|ENSMUSG00000031207|ENSMUSG00000022565|ENSMUSG00000052374|ENSMUSG00000030562|ENSMUSG00000022656|ENSMUSG00000031928|ENSMUSG00000025162|ENSMUSG00000026571|ENSMUSG00000024427|ENSMUSG00000030847|ENSMUSG00000004591|…	http://amigo.geneontology.org/cgi-bin/amigo/term_details?term=GO:0005912
regulation of hydrolase activity	Gene Ontology	GO:0051336	75	758	0.00012757	0.00261549	ENSMUSG00000033335|ENSMUSG00000022119|ENSMUSG00000028207|ENSMUSG00000050395|ENSMUSG00000026576|ENSMUSG00000023923|ENSMUSG00000033420|ENSMUSG00000029192|ENSMUSG00000003032|ENSMUSG00000020696|ENSMUSG00000029131|ENSMUSG00000057719|ENSMUSG00000032083|ENSMUSG00000032356|ENSMUSG00000000881|ENSMUSG00000031565|ENSMUSG00000003134|ENSMUSG00000002279|ENSMUSG00000019278|ENSMUSG00000030849|ENSMUSG00000032812|…	http://amigo.geneontology.org/cgi-bin/amigo/term_details?term=GO:0051336
apical part of cell	Gene Ontology	GO:0045177	41	342	0.00013649	0.00279181	ENSMUSG00000062252|ENSMUSG00000031207|ENSMUSG00000059327|ENSMUSG00000028552|ENSMUSG00000027947|ENSMUSG00000019210|ENSMUSG00000028519|ENSMUSG00000022565|ENSMUSG00000019278|ENSMUSG00000037242|ENSMUSG00000028645|ENSMUSG00000003484|ENSMUSG00000026576|ENSMUSG00000033998|ENSMUSG00000030562|ENSMUSG00000040808|ENSMUSG00000022056|ENSMUSG00000049044|ENSMUSG00000063142|ENSMUSG00000062372|ENSMUSG00000028238|…	http://amigo.geneontology.org/cgi-bin/amigo/term_details?term=GO:0045177
regulation of developmental growth	Gene Ontology	GO:0048638	38	308	0.000139739	0.00284738	ENSMUSG00000048583|ENSMUSG00000020027|ENSMUSG00000070509|ENSMUSG00000031489|ENSMUSG00000059325|ENSMUSG00000033174|ENSMUSG00000005534|ENSMUSG00000031565|ENSMUSG00000055737|ENSMUSG00000049493|ENSMUSG00000033335|ENSMUSG00000030849|ENSMUSG00000001627|ENSMUSG00000019942|ENSMUSG00000043051|ENSMUSG00000010760|ENSMUSG00000002985|ENSMUSG00000038708|ENSMUSG00000029291|ENSMUSG00000019777|ENSMUSG00000005583|…	http://amigo.geneontology.org/cgi-bin/amigo/term_details?term=GO:0048638
stress-activated MAPK cascade	Gene Ontology	GO:0051403	28	198	0.000139859	0.00284738	ENSMUSG00000036390|ENSMUSG00000022382|ENSMUSG00000027540|ENSMUSG00000040183|ENSMUSG00000016528|ENSMUSG00000024182|ENSMUSG00000045005|ENSMUSG00000052539|ENSMUSG00000004054|ENSMUSG00000032501|ENSMUSG00000024039|ENSMUSG00000020893|ENSMUSG00000031392|ENSMUSG00000046709|ENSMUSG00000015305|ENSMUSG00000021678|ENSMUSG00000027692|ENSMUSG00000026872|ENSMUSG00000029657|ENSMUSG00000027598|ENSMUSG00000033542|…	http://amigo.geneontology.org/cgi-bin/amigo/term_details?term=GO:0051403
regulation of cell cycle	Gene Ontology	GO:0051726	70	697	0.000142167	0.00288764	ENSMUSG00000048583|ENSMUSG00000020053|ENSMUSG00000036390|ENSMUSG00000030094|ENSMUSG00000037992|ENSMUSG00000019970|ENSMUSG00000036923|ENSMUSG00000089989|ENSMUSG00000048904|ENSMUSG00000028341|ENSMUSG00000005534|ENSMUSG00000034683|ENSMUSG00000022528|ENSMUSG00000029207|ENSMUSG00000031548|ENSMUSG00000031565|ENSMUSG00000030649|ENSMUSG00000031928|ENSMUSG00000078429|ENSMUSG00000030849|ENSMUSG00000024922|…	http://amigo.geneontology.org/cgi-bin/amigo/term_details?term=GO:0051726
chordate embryonic development	Gene Ontology	GO:0043009	65	634	0.000143545	0.00290887	ENSMUSG00000020173|ENSMUSG00000070509|ENSMUSG00000021466|ENSMUSG00000022382|ENSMUSG00000037992|ENSMUSG00000059325|ENSMUSG00000028023|ENSMUSG00000020911|ENSMUSG00000026812|ENSMUSG00000036144|ENSMUSG00000022528|ENSMUSG00000037025|ENSMUSG00000031565|ENSMUSG00000024182|ENSMUSG00000030849|ENSMUSG00000028639|ENSMUSG00000007880|ENSMUSG00000045005|ENSMUSG00000020937|ENSMUSG00000024440|ENSMUSG00000010760|…	http://amigo.geneontology.org/cgi-bin/amigo/term_details?term=GO:0043009
negative regulation of nucleobase-containing compound metabolic process	Gene Ontology	GO:0045934	99	1076	0.000144237	0.00291613	ENSMUSG00000059325|ENSMUSG00000028341|ENSMUSG00000021264|ENSMUSG00000030849|ENSMUSG00000017548|ENSMUSG00000004698|ENSMUSG00000019777|ENSMUSG00000024176|ENSMUSG00000015120|ENSMUSG00000063632|ENSMUSG00000032498|ENSMUSG00000015837|ENSMUSG00000049892|ENSMUSG00000024042|ENSMUSG00000060032|ENSMUSG00000014303|ENSMUSG00000040407|ENSMUSG00000036036|ENSMUSG00000019768|ENSMUSG00000020108|ENSMUSG00000026826|…	http://amigo.geneontology.org/cgi-bin/amigo/term_details?term=GO:0045934
G-protein coupled receptor binding	Gene Ontology	GO:0001664	30	220	0.000146752	0.00296012	ENSMUSG00000030170|ENSMUSG00000029417|ENSMUSG00000032812|ENSMUSG00000022382|ENSMUSG00000071658|ENSMUSG00000024858|ENSMUSG00000004207|ENSMUSG00000037010|ENSMUSG00000028635|ENSMUSG00000031489|ENSMUSG00000066319|ENSMUSG00000004814|ENSMUSG00000052539|ENSMUSG00000000394|ENSMUSG00000045092|ENSMUSG00000033335|ENSMUSG00000019880|ENSMUSG00000027523|ENSMUSG00000026825|ENSMUSG00000031748|ENSMUSG00000020524|…	http://amigo.geneontology.org/cgi-bin/amigo/term_details?term=GO:0001664
macromolecular complex assembly	Gene Ontology	GO:0065003	112	1253	0.000153739	0.00309391	ENSMUSG00000026491|ENSMUSG00000030218|ENSMUSG00000058624|ENSMUSG00000041974|ENSMUSG00000029203|ENSMUSG00000033335|ENSMUSG00000028933|ENSMUSG00000026414|ENSMUSG00000032405|ENSMUSG00000039450|ENSMUSG00000004814|ENSMUSG00000063142|ENSMUSG00000060038|ENSMUSG00000026812|ENSMUSG00000022353|ENSMUSG00000075705|ENSMUSG00000028745|ENSMUSG00000002546|ENSMUSG00000028832|ENSMUSG00000026825|ENSMUSG00000032489|…	http://amigo.geneontology.org/cgi-bin/amigo/term_details?term=GO:0065003
ear development	Gene Ontology	GO:0043583	27	189	0.000157317	0.00315864	ENSMUSG00000062252|ENSMUSG00000036923|ENSMUSG00000028341|ENSMUSG00000048904|ENSMUSG00000016528|ENSMUSG00000022528|ENSMUSG00000031565|ENSMUSG00000037016|ENSMUSG00000030849|ENSMUSG00000029821|ENSMUSG00000028631|ENSMUSG00000028654|ENSMUSG00000062563|ENSMUSG00000063142|ENSMUSG00000020053|ENSMUSG00000027966|ENSMUSG00000050288|ENSMUSG00000031603|ENSMUSG00000022982|ENSMUSG00000045180|ENSMUSG00000003233|…	http://amigo.geneontology.org/cgi-bin/amigo/term_details?term=GO:0043583
identical protein binding	Gene Ontology	GO:0042802	104	1146	0.000158176	0.00316859	ENSMUSG00000021712|ENSMUSG00000025856|ENSMUSG00000031586|ENSMUSG00000028341|ENSMUSG00000030849|ENSMUSG00000004054|ENSMUSG00000015214|ENSMUSG00000063142|ENSMUSG00000024049|ENSMUSG00000027947|ENSMUSG00000074207|ENSMUSG00000022353|ENSMUSG00000030350|ENSMUSG00000031075|ENSMUSG00000022791|ENSMUSG00000030579|ENSMUSG00000025289|ENSMUSG00000022656|ENSMUSG00000026305|ENSMUSG00000019768|ENSMUSG00000040562|…	http://amigo.geneontology.org/cgi-bin/amigo/term_details?term=GO:0042802
negative regulation of cellular protein metabolic process	Gene Ontology	GO:0032269	77	790	0.000160325	0.0032043	ENSMUSG00000020300|ENSMUSG00000020027|ENSMUSG00000021699|ENSMUSG00000036390|ENSMUSG00000029410|ENSMUSG00000049313|ENSMUSG00000037992|ENSMUSG00000002052|ENSMUSG00000003032|ENSMUSG00000020696|ENSMUSG00000025665|ENSMUSG00000034683|ENSMUSG00000005534|ENSMUSG00000019278|ENSMUSG00000020053|ENSMUSG00000058301|ENSMUSG00000038546|ENSMUSG00000032523|ENSMUSG00000078429|ENSMUSG00000020454|ENSMUSG00000024427|…	http://amigo.geneontology.org/cgi-bin/amigo/term_details?term=GO:0032269
muscle cell differentiation	Gene Ontology	GO:0042692	41	345	0.00016146	0.00321962	ENSMUSG00000048583|ENSMUSG00000029417|ENSMUSG00000022382|ENSMUSG00000037992|ENSMUSG00000059325|ENSMUSG00000002052|ENSMUSG00000038256|ENSMUSG00000089989|ENSMUSG00000022528|ENSMUSG00000052374|ENSMUSG00000030562|ENSMUSG00000027833|ENSMUSG00000030849|ENSMUSG00000028639|ENSMUSG00000007880|ENSMUSG00000026414|ENSMUSG00000001627|ENSMUSG00000020911|ENSMUSG00000021508|ENSMUSG00000032405|ENSMUSG00000004698|…	http://amigo.geneontology.org/cgi-bin/amigo/term_details?term=GO:0042692
negative regulation of programmed cell death	Gene Ontology	GO:0043069	75	765	0.000165089	0.00328448	ENSMUSG00000020053|ENSMUSG00000026826|ENSMUSG00000020300|ENSMUSG00000037992|ENSMUSG00000009670|ENSMUSG00000009291|ENSMUSG00000027954|ENSMUSG00000029304|ENSMUSG00000089989|ENSMUSG00000003032|ENSMUSG00000020696|ENSMUSG00000056501|ENSMUSG00000028341|ENSMUSG00000026778|ENSMUSG00000029207|ENSMUSG00000019278|ENSMUSG00000033685|ENSMUSG00000031928|ENSMUSG00000022200|ENSMUSG00000041354|ENSMUSG00000028639|…	http://amigo.geneontology.org/cgi-bin/amigo/term_details?term=GO:0043069
regulation of axonogenesis	Gene Ontology	GO:0050770	24	159	0.000171528	0.00340483	ENSMUSG00000030110|ENSMUSG00000027954|ENSMUSG00000033174|ENSMUSG00000028519|ENSMUSG00000027833|ENSMUSG00000018411|ENSMUSG00000033335|ENSMUSG00000001627|ENSMUSG00000043051|ENSMUSG00000023328|ENSMUSG00000038708|ENSMUSG00000029291|ENSMUSG00000070509|ENSMUSG00000030084|ENSMUSG00000026640|ENSMUSG00000059146|ENSMUSG00000031558|ENSMUSG00000026872|ENSMUSG00000002546|ENSMUSG00000026235|ENSMUSG00000002985|…	http://amigo.geneontology.org/cgi-bin/amigo/term_details?term=GO:0050770
negative regulation of protein metabolic process	Gene Ontology	GO:0051248	81	844	0.000172495	0.00341233	ENSMUSG00000020300|ENSMUSG00000020027|ENSMUSG00000021699|ENSMUSG00000036390|ENSMUSG00000029410|ENSMUSG00000049313|ENSMUSG00000037992|ENSMUSG00000002052|ENSMUSG00000003032|ENSMUSG00000020696|ENSMUSG00000025665|ENSMUSG00000034683|ENSMUSG00000005534|ENSMUSG00000028277|ENSMUSG00000019278|ENSMUSG00000020053|ENSMUSG00000058301|ENSMUSG00000038546|ENSMUSG00000032523|ENSMUSG00000078429|ENSMUSG00000020454|…	http://amigo.geneontology.org/cgi-bin/amigo/term_details?term=GO:0051248
regulation of cell projection organization	Gene Ontology	GO:0031344	58	551	0.000172687	0.00341233	ENSMUSG00000020173|ENSMUSG00000070509|ENSMUSG00000032812|ENSMUSG00000006304|ENSMUSG00000030110|ENSMUSG00000031548|ENSMUSG00000027833|ENSMUSG00000027954|ENSMUSG00000042211|ENSMUSG00000028519|ENSMUSG00000022528|ENSMUSG00000031302|ENSMUSG00000031565|ENSMUSG00000030084|ENSMUSG00000049493|ENSMUSG00000030657|ENSMUSG00000001627|ENSMUSG00000043051|ENSMUSG00000028176|ENSMUSG00000023328|ENSMUSG00000002985|…	http://amigo.geneontology.org/cgi-bin/amigo/term_details?term=GO:0031344
positive regulation of JUN kinase activity	Gene Ontology	GO:0043507	13	57	0.000180006	0.00354716	ENSMUSG00000031392|ENSMUSG00000015305|ENSMUSG00000033542|ENSMUSG00000027540|ENSMUSG00000061288|ENSMUSG00000022382|ENSMUSG00000004054|ENSMUSG00000003233|ENSMUSG00000026235|ENSMUSG00000026872|ENSMUSG00000024182|ENSMUSG00000045005|ENSMUSG00000052539	http://amigo.geneontology.org/cgi-bin/amigo/term_details?term=GO:0043507
striated muscle tissue development	Gene Ontology	GO:0014706	41	347	0.000180323	0.00354716	ENSMUSG00000020053|ENSMUSG00000057123|ENSMUSG00000037992|ENSMUSG00000028023|ENSMUSG00000038256|ENSMUSG00000045680|ENSMUSG00000041975|ENSMUSG00000045414|ENSMUSG00000031565|ENSMUSG00000027833|ENSMUSG00000030849|ENSMUSG00000007880|ENSMUSG00000026414|ENSMUSG00000054889|ENSMUSG00000019942|ENSMUSG00000031681|ENSMUSG00000036144|ENSMUSG00000030562|ENSMUSG00000004698|ENSMUSG00000019777|ENSMUSG00000024176|…	http://amigo.geneontology.org/cgi-bin/amigo/term_details?term=GO:0014706
regulation of neuron projection development	Gene Ontology	GO:0010975	48	430	0.000181781	0.0035678	ENSMUSG00000020173|ENSMUSG00000070509|ENSMUSG00000030110|ENSMUSG00000031548|ENSMUSG00000027833|ENSMUSG00000027954|ENSMUSG00000042211|ENSMUSG00000028519|ENSMUSG00000022528|ENSMUSG00000031302|ENSMUSG00000031565|ENSMUSG00000030084|ENSMUSG00000002985|ENSMUSG00000030657|ENSMUSG00000001627|ENSMUSG00000043051|ENSMUSG00000028176|ENSMUSG00000023328|ENSMUSG00000049044|ENSMUSG00000003269|ENSMUSG00000029291|…	http://amigo.geneontology.org/cgi-bin/amigo/term_details?term=GO:0010975
RNA polymerase II regulatory region DNA binding	Gene Ontology	GO:0001012	54	503	0.000183096	0.00358556	ENSMUSG00000001419|ENSMUSG00000026826|ENSMUSG00000036923|ENSMUSG00000022383|ENSMUSG00000037992|ENSMUSG00000028023|ENSMUSG00000022895|ENSMUSG00000022335|ENSMUSG00000056501|ENSMUSG00000028341|ENSMUSG00000038402|ENSMUSG00000003154|ENSMUSG00000037025|ENSMUSG00000043456|ENSMUSG00000024513|ENSMUSG00000024922|ENSMUSG00000028639|ENSMUSG00000048626|ENSMUSG00000031681|ENSMUSG00000036144|ENSMUSG00000017548|…	http://amigo.geneontology.org/cgi-bin/amigo/term_details?term=GO:0001012
embryo development ending in birth or egg hatching	Gene Ontology	GO:0009792	65	641	0.000189989	0.00371222	ENSMUSG00000020173|ENSMUSG00000070509|ENSMUSG00000021466|ENSMUSG00000022382|ENSMUSG00000037992|ENSMUSG00000059325|ENSMUSG00000028023|ENSMUSG00000020911|ENSMUSG00000026812|ENSMUSG00000036144|ENSMUSG00000022528|ENSMUSG00000037025|ENSMUSG00000031565|ENSMUSG00000024182|ENSMUSG00000030849|ENSMUSG00000028639|ENSMUSG00000007880|ENSMUSG00000045005|ENSMUSG00000020937|ENSMUSG00000024440|ENSMUSG00000010760|…	http://amigo.geneontology.org/cgi-bin/amigo/term_details?term=GO:0009792
regulation of muscle system process	Gene Ontology	GO:0090257	25	171	0.000197455	0.00384949	ENSMUSG00000057123|ENSMUSG00000021125|ENSMUSG00000033910|ENSMUSG00000003032|ENSMUSG00000028341|ENSMUSG00000024858|ENSMUSG00000053965|ENSMUSG00000026576|ENSMUSG00000026414|ENSMUSG00000028635|ENSMUSG00000061723|ENSMUSG00000025220|ENSMUSG00000032171|ENSMUSG00000020053|ENSMUSG00000021699|ENSMUSG00000032826|ENSMUSG00000022982|ENSMUSG00000061878|ENSMUSG00000030730|ENSMUSG00000034881|ENSMUSG00000063142|…	http://amigo.geneontology.org/cgi-bin/amigo/term_details?term=GO:0090257
protein serine/threonine kinase activity	Gene Ontology	GO:0004674	45	396	0.000199433	0.0038794	ENSMUSG00000034165|ENSMUSG00000024070|ENSMUSG00000019970|ENSMUSG00000004054|ENSMUSG00000016528|ENSMUSG00000030397|ENSMUSG00000025162|ENSMUSG00000036707|ENSMUSG00000067941|ENSMUSG00000019942|ENSMUSG00000004591|ENSMUSG00000020385|ENSMUSG00000026437|ENSMUSG00000042724|ENSMUSG00000024235|ENSMUSG00000026778|ENSMUSG00000020451|ENSMUSG00000020115|ENSMUSG00000020227|ENSMUSG00000021103|ENSMUSG00000031392|…	http://amigo.geneontology.org/cgi-bin/amigo/term_details?term=GO:0004674
behavior	Gene Ontology	GO:0007610	60	580	0.000205263	0.00398394	ENSMUSG00000048583|ENSMUSG00000026825|ENSMUSG00000026826|ENSMUSG00000022383|ENSMUSG00000031489|ENSMUSG00000020431|ENSMUSG00000070880|ENSMUSG00000050511|ENSMUSG00000028341|ENSMUSG00000028519|ENSMUSG00000031302|ENSMUSG00000053965|ENSMUSG00000026235|ENSMUSG00000027584|ENSMUSG00000024513|ENSMUSG00000037025|ENSMUSG00000079056|ENSMUSG00000049551|ENSMUSG00000032010|ENSMUSG00000005142|ENSMUSG00000025630|…	http://amigo.geneontology.org/cgi-bin/amigo/term_details?term=GO:0007610
cell cycle phase transition	Gene Ontology	GO:0044770	35	281	0.000213604	0.00413663	ENSMUSG00000036923|ENSMUSG00000030094|ENSMUSG00000048904|ENSMUSG00000057469|ENSMUSG00000034683|ENSMUSG00000002871|ENSMUSG00000031928|ENSMUSG00000078429|ENSMUSG00000024922|ENSMUSG00000029022|ENSMUSG00000030649|ENSMUSG00000019942|ENSMUSG00000032405|ENSMUSG00000020653|ENSMUSG00000028999|ENSMUSG00000026778|ENSMUSG00000022750|ENSMUSG00000028821|ENSMUSG00000022018|ENSMUSG00000028212|ENSMUSG00000076431|…	http://amigo.geneontology.org/cgi-bin/amigo/term_details?term=GO:0044770
transcriptional activator activity, RNA polymerase II core promoter proximal region sequence-specific binding	Gene Ontology	GO:0001077	30	226	0.000223074	0.00431047	ENSMUSG00000026826|ENSMUSG00000022383|ENSMUSG00000028023|ENSMUSG00000003032|ENSMUSG00000056501|ENSMUSG00000028341|ENSMUSG00000045680|ENSMUSG00000003154|ENSMUSG00000037025|ENSMUSG00000028639|ENSMUSG00000031681|ENSMUSG00000036144|ENSMUSG00000062563|ENSMUSG00000020656|ENSMUSG00000005583|ENSMUSG00000063632|ENSMUSG00000019768|ENSMUSG00000076431|ENSMUSG00000021250|ENSMUSG00000039153|ENSMUSG00000003949|…	http://amigo.geneontology.org/cgi-bin/amigo/term_details?term=GO:0001077
enzyme linked receptor protein signaling pathway	Gene Ontology	GO:0007167	71	723	0.000233587	0.00450365	ENSMUSG00000020170|ENSMUSG00000048583|ENSMUSG00000034165|ENSMUSG00000029096|ENSMUSG00000020027|ENSMUSG00000027540|ENSMUSG00000020053|ENSMUSG00000064330|ENSMUSG00000070509|ENSMUSG00000025856|ENSMUSG00000027954|ENSMUSG00000031443|ENSMUSG00000031586|ENSMUSG00000027288|ENSMUSG00000021360|ENSMUSG00000030110|ENSMUSG00000042377|ENSMUSG00000016528|ENSMUSG00000031548|ENSMUSG00000031565|ENSMUSG00000033014|…	http://amigo.geneontology.org/cgi-bin/amigo/term_details?term=GO:0007167
neural tube closure	Gene Ontology	GO:0001843	17	94	0.000235562	0.00453172	ENSMUSG00000026812|ENSMUSG00000019979|ENSMUSG00000021466|ENSMUSG00000007880|ENSMUSG00000037992|ENSMUSG00000031548|ENSMUSG00000029381|ENSMUSG00000050288|ENSMUSG00000047407|ENSMUSG00000058886|ENSMUSG00000020173|ENSMUSG00000026872|ENSMUSG00000039765|ENSMUSG00000070509|ENSMUSG00000022286|ENSMUSG00000003233|ENSMUSG00000036180	http://amigo.geneontology.org/cgi-bin/amigo/term_details?term=GO:0001843
protein modification by small protein conjugation or removal	Gene Ontology	GO:0070647	64	634	0.000237413	0.00455729	ENSMUSG00000037808|ENSMUSG00000090213|ENSMUSG00000029223|ENSMUSG00000030319|ENSMUSG00000021712|ENSMUSG00000078923|ENSMUSG00000020696|ENSMUSG00000017548|ENSMUSG00000027803|ENSMUSG00000029203|ENSMUSG00000033014|ENSMUSG00000023286|ENSMUSG00000026455|ENSMUSG00000056305|ENSMUSG00000076431|ENSMUSG00000032010|ENSMUSG00000043051|ENSMUSG00000032501|ENSMUSG00000032405|ENSMUSG00000014077|ENSMUSG00000022750|…	http://amigo.geneontology.org/cgi-bin/amigo/term_details?term=GO:0070647
regulation of Ras protein signal transduction	Gene Ontology	GO:0046578	24	163	0.000238872	0.00457523	ENSMUSG00000020053|ENSMUSG00000032083|ENSMUSG00000015243|ENSMUSG00000002985|ENSMUSG00000033335|ENSMUSG00000041354|ENSMUSG00000001583|ENSMUSG00000042895|ENSMUSG00000003269|ENSMUSG00000031785|ENSMUSG00000025504|ENSMUSG00000032356|ENSMUSG00000004952|ENSMUSG00000021708|ENSMUSG00000030220|ENSMUSG00000034116|ENSMUSG00000061751|ENSMUSG00000021678|ENSMUSG00000039621|ENSMUSG00000037211|ENSMUSG00000033542|…	http://amigo.geneontology.org/cgi-bin/amigo/term_details?term=GO:0046578
regulation of protein complex assembly	Gene Ontology	GO:0043254	37	306	0.000242941	0.00464002	ENSMUSG00000049313|ENSMUSG00000006304|ENSMUSG00000021573|ENSMUSG00000058624|ENSMUSG00000050511|ENSMUSG00000003031|ENSMUSG00000031207|ENSMUSG00000041974|ENSMUSG00000018411|ENSMUSG00000029621|ENSMUSG00000032489|ENSMUSG00000043613|ENSMUSG00000049550|ENSMUSG00000061175|ENSMUSG00000050106|ENSMUSG00000010517|ENSMUSG00000004814|ENSMUSG00000021338|ENSMUSG00000002102|ENSMUSG00000029465|ENSMUSG00000039621|…	http://amigo.geneontology.org/cgi-bin/amigo/term_details?term=GO:0043254
system process	Gene Ontology	GO:0003008	120	1379	0.000243317	0.00464002	ENSMUSG00000048583|ENSMUSG00000062252|ENSMUSG00000059325|ENSMUSG00000028341|ENSMUSG00000003484|ENSMUSG00000058886|ENSMUSG00000026414|ENSMUSG00000005583|ENSMUSG00000063142|ENSMUSG00000024049|ENSMUSG00000021699|ENSMUSG00000032826|ENSMUSG00000031075|ENSMUSG00000030470|ENSMUSG00000038642|ENSMUSG00000037251|ENSMUSG00000003032|ENSMUSG00000034881|ENSMUSG00000051149|ENSMUSG00000026825|ENSMUSG00000021125|…	http://amigo.geneontology.org/cgi-bin/amigo/term_details?term=GO:0003008
negative regulation of cell proliferation	Gene Ontology	GO:0008285	57	547	0.000247361	0.00470686	ENSMUSG00000020053|ENSMUSG00000028207|ENSMUSG00000021466|ENSMUSG00000037992|ENSMUSG00000053965|ENSMUSG00000034021|ENSMUSG00000003032|ENSMUSG00000003031|ENSMUSG00000056501|ENSMUSG00000022528|ENSMUSG00000017548|ENSMUSG00000045005|ENSMUSG00000031785|ENSMUSG00000026283|ENSMUSG00000030849|ENSMUSG00000024922|ENSMUSG00000031012|ENSMUSG00000015957|ENSMUSG00000000244|ENSMUSG00000030562|ENSMUSG00000029821|…	http://amigo.geneontology.org/cgi-bin/amigo/term_details?term=GO:0008285
cellular response to organonitrogen compound	Gene Ontology	GO:0071417	38	318	0.000249396	0.00473526	ENSMUSG00000048583|ENSMUSG00000020027|ENSMUSG00000026826|ENSMUSG00000020300|ENSMUSG00000038332|ENSMUSG00000027540|ENSMUSG00000018566|ENSMUSG00000034165|ENSMUSG00000056501|ENSMUSG00000028341|ENSMUSG00000041974|ENSMUSG00000005534|ENSMUSG00000033335|ENSMUSG00000028639|ENSMUSG00000043613|ENSMUSG00000026778|ENSMUSG00000004698|ENSMUSG00000027523|ENSMUSG00000005583|ENSMUSG00000020053|ENSMUSG00000026812|…	http://amigo.geneontology.org/cgi-bin/amigo/term_details?term=GO:0071417
anchoring junction	Gene Ontology	GO:0070161	60	585	0.000252025	0.00477481	ENSMUSG00000033335|ENSMUSG00000034165|ENSMUSG00000006304|ENSMUSG00000027540|ENSMUSG00000063450|ENSMUSG00000003970|ENSMUSG00000028552|ENSMUSG00000033031|ENSMUSG00000031012|ENSMUSG00000016487|ENSMUSG00000031207|ENSMUSG00000022565|ENSMUSG00000052374|ENSMUSG00000030562|ENSMUSG00000022656|ENSMUSG00000031928|ENSMUSG00000025162|ENSMUSG00000026571|ENSMUSG00000024427|ENSMUSG00000030847|ENSMUSG00000004591|…	http://amigo.geneontology.org/cgi-bin/amigo/term_details?term=GO:0070161
tube closure	Gene Ontology	GO:0060606	17	95	0.000262869	0.00496948	ENSMUSG00000026812|ENSMUSG00000019979|ENSMUSG00000021466|ENSMUSG00000007880|ENSMUSG00000037992|ENSMUSG00000031548|ENSMUSG00000029381|ENSMUSG00000050288|ENSMUSG00000047407|ENSMUSG00000058886|ENSMUSG00000020173|ENSMUSG00000026872|ENSMUSG00000039765|ENSMUSG00000070509|ENSMUSG00000022286|ENSMUSG00000003233|ENSMUSG00000036180	http://amigo.geneontology.org/cgi-bin/amigo/term_details?term=GO:0060606
RNA polymerase II regulatory region sequence-specific DNA binding	Gene Ontology	GO:0000977	53	499	0.000264975	0.00499847	ENSMUSG00000001419|ENSMUSG00000026826|ENSMUSG00000036923|ENSMUSG00000022383|ENSMUSG00000037992|ENSMUSG00000028023|ENSMUSG00000022895|ENSMUSG00000022335|ENSMUSG00000056501|ENSMUSG00000028341|ENSMUSG00000038402|ENSMUSG00000003154|ENSMUSG00000037025|ENSMUSG00000043456|ENSMUSG00000024513|ENSMUSG00000024922|ENSMUSG00000028639|ENSMUSG00000048626|ENSMUSG00000031681|ENSMUSG00000036144|ENSMUSG00000017548|…	http://amigo.geneontology.org/cgi-bin/amigo/term_details?term=GO:0000977
small molecule metabolic process	Gene Ontology	GO:0044281	127	1479	0.000265744	0.00500217	ENSMUSG00000048583|ENSMUSG00000006575|ENSMUSG00000058624|ENSMUSG00000030759|ENSMUSG00000021266|ENSMUSG00000028341|ENSMUSG00000019278|ENSMUSG00000003072|ENSMUSG00000003484|ENSMUSG00000049313|ENSMUSG00000039450|ENSMUSG00000035621|ENSMUSG00000063142|ENSMUSG00000029524|ENSMUSG00000060038|ENSMUSG00000021699|ENSMUSG00000074207|ENSMUSG00000026819|ENSMUSG00000024042|ENSMUSG00000031883|ENSMUSG00000063428|…	http://amigo.geneontology.org/cgi-bin/amigo/term_details?term=GO:0044281
transcription factor binding	Gene Ontology	GO:0008134	52	487	0.000268717	0.00504725	ENSMUSG00000056770|ENSMUSG00000022383|ENSMUSG00000029413|ENSMUSG00000037992|ENSMUSG00000045680|ENSMUSG00000028023|ENSMUSG00000003032|ENSMUSG00000030161|ENSMUSG00000056501|ENSMUSG00000028341|ENSMUSG00000038402|ENSMUSG00000022528|ENSMUSG00000024914|ENSMUSG00000037025|ENSMUSG00000029207|ENSMUSG00000028639|ENSMUSG00000048546|ENSMUSG00000001627|ENSMUSG00000010517|ENSMUSG00000032501|ENSMUSG00000025223|…	http://amigo.geneontology.org/cgi-bin/amigo/term_details?term=GO:0008134
embryonic camera-type eye formation	Gene Ontology	GO:0060900	6	11	0.000275771	0.00516221	ENSMUSG00000020170|ENSMUSG00000007880|ENSMUSG00000053279|ENSMUSG00000015134|ENSMUSG00000032327|ENSMUSG00000063632	http://amigo.geneontology.org/cgi-bin/amigo/term_details?term=GO:0060900
establishment of localization in cell	Gene Ontology	GO:0051649	124	1439	0.000276019	0.00516221	ENSMUSG00000030216|ENSMUSG00000027540|ENSMUSG00000023923|ENSMUSG00000059327|ENSMUSG00000029192|ENSMUSG00000031586|ENSMUSG00000020696|ENSMUSG00000028341|ENSMUSG00000045005|ENSMUSG00000024873|ENSMUSG00000023286|ENSMUSG00000030849|ENSMUSG00000026414|ENSMUSG00000028998|ENSMUSG00000066232|ENSMUSG00000030595|ENSMUSG00000029291|ENSMUSG00000005583|ENSMUSG00000029524|ENSMUSG00000026812|ENSMUSG00000032826|…	http://amigo.geneontology.org/cgi-bin/amigo/term_details?term=GO:0051649
response to organonitrogen compound	Gene Ontology	GO:0010243	53	500	0.000276878	0.00516721	ENSMUSG00000048583|ENSMUSG00000020027|ENSMUSG00000026826|ENSMUSG00000020300|ENSMUSG00000022383|ENSMUSG00000038332|ENSMUSG00000027540|ENSMUSG00000021134|ENSMUSG00000018566|ENSMUSG00000034165|ENSMUSG00000056501|ENSMUSG00000028341|ENSMUSG00000041974|ENSMUSG00000005534|ENSMUSG00000052374|ENSMUSG00000020053|ENSMUSG00000024039|ENSMUSG00000033335|ENSMUSG00000028639|ENSMUSG00000043613|ENSMUSG00000019942|…	http://amigo.geneontology.org/cgi-bin/amigo/term_details?term=GO:0010243
positive regulation of cellular component biogenesis	Gene Ontology	GO:0044089	43	379	0.000281642	0.0052449	ENSMUSG00000020173|ENSMUSG00000032812|ENSMUSG00000006304|ENSMUSG00000055003|ENSMUSG00000021573|ENSMUSG00000058624|ENSMUSG00000003031|ENSMUSG00000028782|ENSMUSG00000031207|ENSMUSG00000032083|ENSMUSG00000041974|ENSMUSG00000031302|ENSMUSG00000030562|ENSMUSG00000018411|ENSMUSG00000029621|ENSMUSG00000033335|ENSMUSG00000038013|ENSMUSG00000043613|ENSMUSG00000044505|ENSMUSG00000049550|ENSMUSG00000036295|…	http://amigo.geneontology.org/cgi-bin/amigo/term_details?term=GO:0044089
regulation of stress-activated MAPK cascade	Gene Ontology	GO:0032872	25	176	0.000292277	0.00541985	ENSMUSG00000036390|ENSMUSG00000022382|ENSMUSG00000027540|ENSMUSG00000040183|ENSMUSG00000024182|ENSMUSG00000045005|ENSMUSG00000052539|ENSMUSG00000004054|ENSMUSG00000024039|ENSMUSG00000020893|ENSMUSG00000031392|ENSMUSG00000015305|ENSMUSG00000021678|ENSMUSG00000027692|ENSMUSG00000026872|ENSMUSG00000029657|ENSMUSG00000027598|ENSMUSG00000033542|ENSMUSG00000061288|ENSMUSG00000031548|ENSMUSG00000003233|…	http://amigo.geneontology.org/cgi-bin/amigo/term_details?term=GO:0032872
regulation of I-kappaB kinase/NF-kappaB signaling	Gene Ontology	GO:0043122	25	176	0.000292277	0.00541985	ENSMUSG00000059327|ENSMUSG00000078923|ENSMUSG00000026070|ENSMUSG00000015837|ENSMUSG00000023349|ENSMUSG00000032688|ENSMUSG00000003184|ENSMUSG00000010517|ENSMUSG00000026778|ENSMUSG00000030595|ENSMUSG00000021025|ENSMUSG00000002233|ENSMUSG00000015120|ENSMUSG00000020893|ENSMUSG00000026637|ENSMUSG00000031392|ENSMUSG00000021678|ENSMUSG00000024122|ENSMUSG00000030471|ENSMUSG00000028756|ENSMUSG00000061878|…	http://amigo.geneontology.org/cgi-bin/amigo/term_details?term=GO:0043122
sensory organ morphogenesis	Gene Ontology	GO:0090596	32	253	0.000305943	0.00566124	ENSMUSG00000020170|ENSMUSG00000062252|ENSMUSG00000036923|ENSMUSG00000021264|ENSMUSG00000053279|ENSMUSG00000028023|ENSMUSG00000044217|ENSMUSG00000048904|ENSMUSG00000028341|ENSMUSG00000038402|ENSMUSG00000024182|ENSMUSG00000045005|ENSMUSG00000030849|ENSMUSG00000029669|ENSMUSG00000007880|ENSMUSG00000031565|ENSMUSG00000028631|ENSMUSG00000022656|ENSMUSG00000019777|ENSMUSG00000024176|ENSMUSG00000063632|…	http://amigo.geneontology.org/cgi-bin/amigo/term_details?term=GO:0090596
labyrinthine layer morphogenesis	Gene Ontology	GO:0060713	8	23	0.000309612	0.00571702	ENSMUSG00000030849|ENSMUSG00000022382|ENSMUSG00000029131|ENSMUSG00000019880|ENSMUSG00000020647|ENSMUSG00000022286|ENSMUSG00000045005|ENSMUSG00000020782	http://amigo.geneontology.org/cgi-bin/amigo/term_details?term=GO:0060713
regulation of cellular response to growth factor stimulus	Gene Ontology	GO:0090287	28	209	0.000310851	0.00572778	ENSMUSG00000027540|ENSMUSG00000029096|ENSMUSG00000022528|ENSMUSG00000031565|ENSMUSG00000033014|ENSMUSG00000050069|ENSMUSG00000033335|ENSMUSG00000030849|ENSMUSG00000019929|ENSMUSG00000048373|ENSMUSG00000092035|ENSMUSG00000063632|ENSMUSG00000032171|ENSMUSG00000031012|ENSMUSG00000039153|ENSMUSG00000064325|ENSMUSG00000024122|ENSMUSG00000037211|ENSMUSG00000031558|ENSMUSG00000070509|ENSMUSG00000044461|…	http://amigo.geneontology.org/cgi-bin/amigo/term_details?term=GO:0090287
regulation of stress-activated protein kinase signaling cascade	Gene Ontology	GO:0070302	25	177	0.000315459	0.00580047	ENSMUSG00000036390|ENSMUSG00000022382|ENSMUSG00000027540|ENSMUSG00000040183|ENSMUSG00000024182|ENSMUSG00000045005|ENSMUSG00000052539|ENSMUSG00000004054|ENSMUSG00000024039|ENSMUSG00000020893|ENSMUSG00000031392|ENSMUSG00000015305|ENSMUSG00000021678|ENSMUSG00000027692|ENSMUSG00000026872|ENSMUSG00000029657|ENSMUSG00000027598|ENSMUSG00000033542|ENSMUSG00000061288|ENSMUSG00000031548|ENSMUSG00000003233|…	http://amigo.geneontology.org/cgi-bin/amigo/term_details?term=GO:0070302
neuron death	Gene Ontology	GO:0070997	37	311	0.000322529	0.00591801	ENSMUSG00000026826|ENSMUSG00000020300|ENSMUSG00000022383|ENSMUSG00000056501|ENSMUSG00000028341|ENSMUSG00000023328|ENSMUSG00000049313|ENSMUSG00000079056|ENSMUSG00000022307|ENSMUSG00000004054|ENSMUSG00000036144|ENSMUSG00000046949|ENSMUSG00000014077|ENSMUSG00000021285|ENSMUSG00000000753|ENSMUSG00000005583|ENSMUSG00000049001|ENSMUSG00000063142|ENSMUSG00000020053|ENSMUSG00000026812|ENSMUSG00000055737|…	http://amigo.geneontology.org/cgi-bin/amigo/term_details?term=GO:0070997
regulation of defense response	Gene Ontology	GO:0031347	53	504	0.000329464	0.00603258	ENSMUSG00000048583|ENSMUSG00000022383|ENSMUSG00000034023|ENSMUSG00000033174|ENSMUSG00000016528|ENSMUSG00000032083|ENSMUSG00000053965|ENSMUSG00000020823|ENSMUSG00000029203|ENSMUSG00000026576|ENSMUSG00000042265|ENSMUSG00000041193|ENSMUSG00000043496|ENSMUSG00000003184|ENSMUSG00000002985|ENSMUSG00000062300|ENSMUSG00000020115|ENSMUSG00000021025|ENSMUSG00000000753|ENSMUSG00000020227|ENSMUSG00000020893|…	http://amigo.geneontology.org/cgi-bin/amigo/term_details?term=GO:0031347
protein localization to organelle	Gene Ontology	GO:0033365	67	681	0.000330333	0.00603583	ENSMUSG00000061878|ENSMUSG00000029524|ENSMUSG00000059208|ENSMUSG00000049313|ENSMUSG00000020053|ENSMUSG00000063450|ENSMUSG00000038495|ENSMUSG00000030216|ENSMUSG00000059327|ENSMUSG00000043051|ENSMUSG00000050511|ENSMUSG00000031586|ENSMUSG00000014776|ENSMUSG00000022528|ENSMUSG00000040435|ENSMUSG00000045005|ENSMUSG00000027803|ENSMUSG00000041974|ENSMUSG00000023286|ENSMUSG00000025162|ENSMUSG00000045969|…	http://amigo.geneontology.org/cgi-bin/amigo/term_details?term=GO:0033365
protein kinase binding	Gene Ontology	GO:0019901	56	542	0.000338252	0.00616763	ENSMUSG00000020170|ENSMUSG00000026825|ENSMUSG00000034165|ENSMUSG00000029410|ENSMUSG00000037992|ENSMUSG00000031207|ENSMUSG00000019254|ENSMUSG00000029192|ENSMUSG00000089989|ENSMUSG00000020696|ENSMUSG00000028341|ENSMUSG00000005534|ENSMUSG00000022528|ENSMUSG00000015837|ENSMUSG00000017485|ENSMUSG00000045005|ENSMUSG00000018411|ENSMUSG00000020524|ENSMUSG00000021134|ENSMUSG00000027829|ENSMUSG00000004054|…	http://amigo.geneontology.org/cgi-bin/amigo/term_details?term=GO:0019901
regulation of cellular component size	Gene Ontology	GO:0032535	37	312	0.00034099	0.00620461	ENSMUSG00000033444|ENSMUSG00000070509|ENSMUSG00000022382|ENSMUSG00000033174|ENSMUSG00000059146|ENSMUSG00000030110|ENSMUSG00000052374|ENSMUSG00000049493|ENSMUSG00000029621|ENSMUSG00000033335|ENSMUSG00000001627|ENSMUSG00000006304|ENSMUSG00000043051|ENSMUSG00000002985|ENSMUSG00000021678|ENSMUSG00000038708|ENSMUSG00000029291|ENSMUSG00000004814|ENSMUSG00000063142|ENSMUSG00000021338|ENSMUSG00000026812|…	http://amigo.geneontology.org/cgi-bin/amigo/term_details?term=GO:0032535
cell morphogenesis involved in neuron differentiation	Gene Ontology	GO:0048667	50	468	0.000344863	0.00626202	ENSMUSG00000062252|ENSMUSG00000026826|ENSMUSG00000020173|ENSMUSG00000022382|ENSMUSG00000020431|ENSMUSG00000030110|ENSMUSG00000027954|ENSMUSG00000033174|ENSMUSG00000043051|ENSMUSG00000028341|ENSMUSG00000028519|ENSMUSG00000022528|ENSMUSG00000029207|ENSMUSG00000031302|ENSMUSG00000027833|ENSMUSG00000023328|ENSMUSG00000033335|ENSMUSG00000030849|ENSMUSG00000001627|ENSMUSG00000049556|ENSMUSG00000017485|…	http://amigo.geneontology.org/cgi-bin/amigo/term_details?term=GO:0048667
negative regulation of mitotic cell cycle	Gene Ontology	GO:0045930	22	147	0.000348642	0.00631752	ENSMUSG00000030094|ENSMUSG00000003031|ENSMUSG00000002871|ENSMUSG00000031928|ENSMUSG00000078429|ENSMUSG00000030849|ENSMUSG00000024922|ENSMUSG00000029022|ENSMUSG00000030649|ENSMUSG00000019942|ENSMUSG00000017485|ENSMUSG00000028999|ENSMUSG00000022750|ENSMUSG00000032400|ENSMUSG00000022018|ENSMUSG00000076431|ENSMUSG00000028821|ENSMUSG00000022510|ENSMUSG00000061288|ENSMUSG00000025764|ENSMUSG00000073802|…	http://amigo.geneontology.org/cgi-bin/amigo/term_details?term=GO:0045930
RNA polymerase II core promoter proximal region sequence-specific DNA binding	Gene Ontology	GO:0000978	36	301	0.000352566	0.00637539	ENSMUSG00000026826|ENSMUSG00000022383|ENSMUSG00000028023|ENSMUSG00000022895|ENSMUSG00000056501|ENSMUSG00000028341|ENSMUSG00000003154|ENSMUSG00000037025|ENSMUSG00000043456|ENSMUSG00000024513|ENSMUSG00000024922|ENSMUSG00000028639|ENSMUSG00000048626|ENSMUSG00000031681|ENSMUSG00000036144|ENSMUSG00000017007|ENSMUSG00000062563|ENSMUSG00000020656|ENSMUSG00000019777|ENSMUSG00000005583|ENSMUSG00000020893|…	http://amigo.geneontology.org/cgi-bin/amigo/term_details?term=GO:0000978
actomyosin structure organization	Gene Ontology	GO:0031032	21	137	0.000354204	0.00639177	ENSMUSG00000045092|ENSMUSG00000021338|ENSMUSG00000026812|ENSMUSG00000052374|ENSMUSG00000030739|ENSMUSG00000032812|ENSMUSG00000033542|ENSMUSG00000026778|ENSMUSG00000026414|ENSMUSG00000024043|ENSMUSG00000022018|ENSMUSG00000037736|ENSMUSG00000015957|ENSMUSG00000020911|ENSMUSG00000030470|ENSMUSG00000058587|ENSMUSG00000032083|ENSMUSG00000019777|ENSMUSG00000005583|ENSMUSG00000030562|ENSMUSG00000025006	http://amigo.geneontology.org/cgi-bin/amigo/term_details?term=GO:0031032
reproductive structure development	Gene Ontology	GO:0048608	42	372	0.000361063	0.00650211	ENSMUSG00000020170|ENSMUSG00000020911|ENSMUSG00000022382|ENSMUSG00000037992|ENSMUSG00000009670|ENSMUSG00000045680|ENSMUSG00000025326|ENSMUSG00000003031|ENSMUSG00000056501|ENSMUSG00000038402|ENSMUSG00000022528|ENSMUSG00000045005|ENSMUSG00000005534|ENSMUSG00000004207|ENSMUSG00000030849|ENSMUSG00000007880|ENSMUSG00000028635|ENSMUSG00000020937|ENSMUSG00000024440|ENSMUSG00000010760|ENSMUSG00000020782|…	http://amigo.geneontology.org/cgi-bin/amigo/term_details?term=GO:0048608
primary neural tube formation	Gene Ontology	GO:0014020	17	98	0.000361921	0.00650415	ENSMUSG00000026812|ENSMUSG00000019979|ENSMUSG00000021466|ENSMUSG00000007880|ENSMUSG00000037992|ENSMUSG00000031548|ENSMUSG00000029381|ENSMUSG00000050288|ENSMUSG00000047407|ENSMUSG00000058886|ENSMUSG00000020173|ENSMUSG00000026872|ENSMUSG00000039765|ENSMUSG00000070509|ENSMUSG00000022286|ENSMUSG00000003233|ENSMUSG00000036180	http://amigo.geneontology.org/cgi-bin/amigo/term_details?term=GO:0014020
prostate glandular acinus morphogenesis	Gene Ontology	GO:0060526	5	7	0.000375526	0.006721	ENSMUSG00000020170|ENSMUSG00000020053|ENSMUSG00000031548|ENSMUSG00000030849|ENSMUSG00000019768	http://amigo.geneontology.org/cgi-bin/amigo/term_details?term=GO:0060526
prostate epithelial cord arborization involved in prostate glandular acinus morphogenesis	Gene Ontology	GO:0060527	5	7	0.000375526	0.006721	ENSMUSG00000020170|ENSMUSG00000020053|ENSMUSG00000031548|ENSMUSG00000030849|ENSMUSG00000019768	http://amigo.geneontology.org/cgi-bin/amigo/term_details?term=GO:0060527
embryonic camera-type eye development	Gene Ontology	GO:0031076	10	38	0.000376789	0.0067298	ENSMUSG00000020170|ENSMUSG00000007880|ENSMUSG00000037992|ENSMUSG00000045005|ENSMUSG00000053279|ENSMUSG00000028023|ENSMUSG00000015134|ENSMUSG00000032327|ENSMUSG00000038402|ENSMUSG00000063632	http://amigo.geneontology.org/cgi-bin/amigo/term_details?term=GO:0031076
prostate glandular acinus development	Gene Ontology	GO:0060525	6	12	0.00039331	0.00701056	ENSMUSG00000020170|ENSMUSG00000020053|ENSMUSG00000030849|ENSMUSG00000031548|ENSMUSG00000022510|ENSMUSG00000019768	http://amigo.geneontology.org/cgi-bin/amigo/term_details?term=GO:0060525
cell-cell adhesion	Gene Ontology	GO:0098609	80	856	0.000398959	0.00709235	ENSMUSG00000048583|ENSMUSG00000020053|ENSMUSG00000034165|ENSMUSG00000031217|ENSMUSG00000021360|ENSMUSG00000022383|ENSMUSG00000022382|ENSMUSG00000037992|ENSMUSG00000030110|ENSMUSG00000034023|ENSMUSG00000022565|ENSMUSG00000028552|ENSMUSG00000070904|ENSMUSG00000006411|ENSMUSG00000026812|ENSMUSG00000056501|ENSMUSG00000028341|ENSMUSG00000028519|ENSMUSG00000032083|ENSMUSG00000022528|ENSMUSG00000016487|…	http://amigo.geneontology.org/cgi-bin/amigo/term_details?term=GO:0098609
positive regulation of establishment of protein localization	Gene Ontology	GO:1904951	49	459	0.000399523	0.00709235	ENSMUSG00000061878|ENSMUSG00000059208|ENSMUSG00000050395|ENSMUSG00000030216|ENSMUSG00000059327|ENSMUSG00000031586|ENSMUSG00000022528|ENSMUSG00000015568|ENSMUSG00000020848|ENSMUSG00000049493|ENSMUSG00000023349|ENSMUSG00000022200|ENSMUSG00000049313|ENSMUSG00000044811|ENSMUSG00000045005|ENSMUSG00000019942|ENSMUSG00000003184|ENSMUSG00000025006|ENSMUSG00000028998|ENSMUSG00000025220|ENSMUSG00000026778|…	http://amigo.geneontology.org/cgi-bin/amigo/term_details?term=GO:1904951
core promoter proximal region sequence-specific DNA binding	Gene Ontology	GO:0000987	37	315	0.000402157	0.00712462	ENSMUSG00000026826|ENSMUSG00000022383|ENSMUSG00000028023|ENSMUSG00000022895|ENSMUSG00000056501|ENSMUSG00000028341|ENSMUSG00000003154|ENSMUSG00000037025|ENSMUSG00000043456|ENSMUSG00000024513|ENSMUSG00000024922|ENSMUSG00000028639|ENSMUSG00000048626|ENSMUSG00000031681|ENSMUSG00000036144|ENSMUSG00000017007|ENSMUSG00000062563|ENSMUSG00000020656|ENSMUSG00000019777|ENSMUSG00000005583|ENSMUSG00000020893|…	http://amigo.geneontology.org/cgi-bin/amigo/term_details?term=GO:0000987
muscle system process	Gene Ontology	GO:0003012	35	292	0.00040758	0.00720608	ENSMUSG00000057123|ENSMUSG00000032171|ENSMUSG00000021125|ENSMUSG00000033910|ENSMUSG00000003032|ENSMUSG00000028341|ENSMUSG00000030730|ENSMUSG00000053965|ENSMUSG00000030554|ENSMUSG00000026576|ENSMUSG00000026414|ENSMUSG00000028635|ENSMUSG00000052374|ENSMUSG00000061723|ENSMUSG00000025220|ENSMUSG00000001508|ENSMUSG00000005583|ENSMUSG00000063142|ENSMUSG00000020053|ENSMUSG00000024049|ENSMUSG00000021699|…	http://amigo.geneontology.org/cgi-bin/amigo/term_details?term=GO:0003012
somatodendritic compartment	Gene Ontology	GO:0036477	71	739	0.000413139	0.00728962	ENSMUSG00000020009|ENSMUSG00000020300|ENSMUSG00000000881|ENSMUSG00000002546|ENSMUSG00000049313|ENSMUSG00000071072|ENSMUSG00000037992|ENSMUSG00000030495|ENSMUSG00000030110|ENSMUSG00000027947|ENSMUSG00000026304|ENSMUSG00000023964|ENSMUSG00000048904|ENSMUSG00000071658|ENSMUSG00000028519|ENSMUSG00000005534|ENSMUSG00000031302|ENSMUSG00000024873|ENSMUSG00000023328|ENSMUSG00000030161|ENSMUSG00000022553|…	http://amigo.geneontology.org/cgi-bin/amigo/term_details?term=GO:0036477
organonitrogen compound metabolic process	Gene Ontology	GO:1901564	135	1609	0.000417102	0.0073447	ENSMUSG00000020300|ENSMUSG00000006575|ENSMUSG00000029273|ENSMUSG00000031105|ENSMUSG00000058624|ENSMUSG00000021266|ENSMUSG00000021265|ENSMUSG00000019278|ENSMUSG00000003072|ENSMUSG00000058301|ENSMUSG00000049313|ENSMUSG00000027170|ENSMUSG00000039450|ENSMUSG00000031842|ENSMUSG00000020893|ENSMUSG00000029524|ENSMUSG00000060038|ENSMUSG00000026812|ENSMUSG00000026819|ENSMUSG00000024039|ENSMUSG00000063428|…	http://amigo.geneontology.org/cgi-bin/amigo/term_details?term=GO:1901564
reproductive system development	Gene Ontology	GO:0061458	42	375	0.000419344	0.00736932	ENSMUSG00000020170|ENSMUSG00000020911|ENSMUSG00000022382|ENSMUSG00000037992|ENSMUSG00000009670|ENSMUSG00000045680|ENSMUSG00000025326|ENSMUSG00000003031|ENSMUSG00000056501|ENSMUSG00000038402|ENSMUSG00000022528|ENSMUSG00000045005|ENSMUSG00000005534|ENSMUSG00000004207|ENSMUSG00000030849|ENSMUSG00000007880|ENSMUSG00000028635|ENSMUSG00000020937|ENSMUSG00000024440|ENSMUSG00000010760|ENSMUSG00000020782|…	http://amigo.geneontology.org/cgi-bin/amigo/term_details?term=GO:0061458
regulation of actin cytoskeleton organization	Gene Ontology	GO:0032956	31	247	0.000424263	0.00744078	ENSMUSG00000033444|ENSMUSG00000032812|ENSMUSG00000021338|ENSMUSG00000059146|ENSMUSG00000032083|ENSMUSG00000052374|ENSMUSG00000030562|ENSMUSG00000029621|ENSMUSG00000004814|ENSMUSG00000038013|ENSMUSG00000006304|ENSMUSG00000029465|ENSMUSG00000026778|ENSMUSG00000019777|ENSMUSG00000005583|ENSMUSG00000022018|ENSMUSG00000045092|ENSMUSG00000030220|ENSMUSG00000026812|ENSMUSG00000021678|ENSMUSG00000024043|…	http://amigo.geneontology.org/cgi-bin/amigo/term_details?term=GO:0032956
pinocytosis	Gene Ontology	GO:0006907	7	18	0.000428663	0.00750289	ENSMUSG00000021338|ENSMUSG00000033335|ENSMUSG00000032577|ENSMUSG00000054808|ENSMUSG00000016528|ENSMUSG00000020790|ENSMUSG00000007655	http://amigo.geneontology.org/cgi-bin/amigo/term_details?term=GO:0006907
muscle organ development	Gene Ontology	GO:0007517	38	328	0.000430657	0.00752053	ENSMUSG00000020053|ENSMUSG00000004383|ENSMUSG00000028023|ENSMUSG00000038256|ENSMUSG00000045680|ENSMUSG00000041975|ENSMUSG00000031565|ENSMUSG00000027833|ENSMUSG00000030849|ENSMUSG00000027763|ENSMUSG00000026414|ENSMUSG00000054889|ENSMUSG00000019942|ENSMUSG00000032010|ENSMUSG00000036144|ENSMUSG00000004698|ENSMUSG00000019777|ENSMUSG00000024176|ENSMUSG00000005583|ENSMUSG00000063632|ENSMUSG00000045098|…	http://amigo.geneontology.org/cgi-bin/amigo/term_details?term=GO:0007517
positive regulation of cytoskeleton organization	Gene Ontology	GO:0051495	23	160	0.000431393	0.00752053	ENSMUSG00000006304|ENSMUSG00000058624|ENSMUSG00000003031|ENSMUSG00000032083|ENSMUSG00000041598|ENSMUSG00000030562|ENSMUSG00000018411|ENSMUSG00000029621|ENSMUSG00000038013|ENSMUSG00000049550|ENSMUSG00000029465|ENSMUSG00000026778|ENSMUSG00000004814|ENSMUSG00000022018|ENSMUSG00000021338|ENSMUSG00000021678|ENSMUSG00000059146|ENSMUSG00000056367|ENSMUSG00000022353|ENSMUSG00000033542|ENSMUSG00000052374|…	http://amigo.geneontology.org/cgi-bin/amigo/term_details?term=GO:0051495
response to hormone	Gene Ontology	GO:0009725	54	523	0.000434265	0.00755552	ENSMUSG00000048583|ENSMUSG00000020027|ENSMUSG00000026826|ENSMUSG00000034165|ENSMUSG00000022383|ENSMUSG00000071072|ENSMUSG00000037992|ENSMUSG00000021134|ENSMUSG00000029304|ENSMUSG00000023964|ENSMUSG00000027288|ENSMUSG00000028341|ENSMUSG00000045680|ENSMUSG00000005534|ENSMUSG00000044359|ENSMUSG00000028639|ENSMUSG00000007880|ENSMUSG00000036449|ENSMUSG00000052374|ENSMUSG00000027540|ENSMUSG00000026778|…	http://amigo.geneontology.org/cgi-bin/amigo/term_details?term=GO:0009725
cytoplasmic region	Gene Ontology	GO:0099568	28	214	0.000436912	0.00758645	ENSMUSG00000020173|ENSMUSG00000028207|ENSMUSG00000070880|ENSMUSG00000026812|ENSMUSG00000052374|ENSMUSG00000028645|ENSMUSG00000049493|ENSMUSG00000030849|ENSMUSG00000026288|ENSMUSG00000001642|ENSMUSG00000020911|ENSMUSG00000032010|ENSMUSG00000022982|ENSMUSG00000054808|ENSMUSG00000036923|ENSMUSG00000069662|ENSMUSG00000030161|ENSMUSG00000038366|ENSMUSG00000030244|ENSMUSG00000030340|ENSMUSG00000020782|…	http://amigo.geneontology.org/cgi-bin/amigo/term_details?term=GO:0099568
regulation of small GTPase mediated signal transduction	Gene Ontology	GO:0051056	25	182	0.000457382	0.00791045	ENSMUSG00000020053|ENSMUSG00000032083|ENSMUSG00000015243|ENSMUSG00000002985|ENSMUSG00000033335|ENSMUSG00000041354|ENSMUSG00000001583|ENSMUSG00000042895|ENSMUSG00000003269|ENSMUSG00000031785|ENSMUSG00000025504|ENSMUSG00000032356|ENSMUSG00000004952|ENSMUSG00000021708|ENSMUSG00000030220|ENSMUSG00000034116|ENSMUSG00000061751|ENSMUSG00000021678|ENSMUSG00000039621|ENSMUSG00000037211|ENSMUSG00000031558|…	http://amigo.geneontology.org/cgi-bin/amigo/term_details?term=GO:0051056
muscle cell proliferation	Gene Ontology	GO:0033002	25	182	0.000457382	0.00791045	ENSMUSG00000045092|ENSMUSG00000020053|ENSMUSG00000003032|ENSMUSG00000003031|ENSMUSG00000028341|ENSMUSG00000045414|ENSMUSG00000031565|ENSMUSG00000030849|ENSMUSG00000061079|ENSMUSG00000001642|ENSMUSG00000019942|ENSMUSG00000031681|ENSMUSG00000032501|ENSMUSG00000046949|ENSMUSG00000019777|ENSMUSG00000005583|ENSMUSG00000021103|ENSMUSG00000031392|ENSMUSG00000027947|ENSMUSG00000061751|ENSMUSG00000031603|…	http://amigo.geneontology.org/cgi-bin/amigo/term_details?term=GO:0033002
cellular response to lipid	Gene Ontology	GO:0071396	41	365	0.000462562	0.00798423	ENSMUSG00000071072|ENSMUSG00000026826|ENSMUSG00000022383|ENSMUSG00000037992|ENSMUSG00000045680|ENSMUSG00000021466|ENSMUSG00000056501|ENSMUSG00000028341|ENSMUSG00000030110|ENSMUSG00000020053|ENSMUSG00000058301|ENSMUSG00000007880|ENSMUSG00000034610|ENSMUSG00000003184|ENSMUSG00000032501|ENSMUSG00000030595|ENSMUSG00000020108|ENSMUSG00000021025|ENSMUSG00000050824|ENSMUSG00000005583|ENSMUSG00000020893|…	http://amigo.geneontology.org/cgi-bin/amigo/term_details?term=GO:0071396
response to nitrogen compound	Gene Ontology	GO:1901698	59	588	0.000468673	0.00807375	ENSMUSG00000048583|ENSMUSG00000020027|ENSMUSG00000026826|ENSMUSG00000020300|ENSMUSG00000022383|ENSMUSG00000038332|ENSMUSG00000027540|ENSMUSG00000021134|ENSMUSG00000018566|ENSMUSG00000034165|ENSMUSG00000056501|ENSMUSG00000028341|ENSMUSG00000041974|ENSMUSG00000070904|ENSMUSG00000005534|ENSMUSG00000052374|ENSMUSG00000020053|ENSMUSG00000024039|ENSMUSG00000033335|ENSMUSG00000028639|ENSMUSG00000043613|…	http://amigo.geneontology.org/cgi-bin/amigo/term_details?term=GO:1901698
organic substance catabolic process	Gene Ontology	GO:1901575	119	1391	0.000471048	0.00809869	ENSMUSG00000027540|ENSMUSG00000058624|ENSMUSG00000020696|ENSMUSG00000029055|ENSMUSG00000037296|ENSMUSG00000058301|ENSMUSG00000029203|ENSMUSG00000023286|ENSMUSG00000003484|ENSMUSG00000012126|ENSMUSG00000024579|ENSMUSG00000015120|ENSMUSG00000025509|ENSMUSG00000032498|ENSMUSG00000060038|ENSMUSG00000021699|ENSMUSG00000074207|ENSMUSG00000018189|ENSMUSG00000033417|ENSMUSG00000075701|ENSMUSG00000063428|…	http://amigo.geneontology.org/cgi-bin/amigo/term_details?term=GO:1901575
core promoter proximal region DNA binding	Gene Ontology	GO:0001159	37	318	0.0004729	0.00811456	ENSMUSG00000026826|ENSMUSG00000022383|ENSMUSG00000028023|ENSMUSG00000022895|ENSMUSG00000056501|ENSMUSG00000028341|ENSMUSG00000003154|ENSMUSG00000037025|ENSMUSG00000043456|ENSMUSG00000024513|ENSMUSG00000024922|ENSMUSG00000028639|ENSMUSG00000048626|ENSMUSG00000031681|ENSMUSG00000036144|ENSMUSG00000017007|ENSMUSG00000062563|ENSMUSG00000020656|ENSMUSG00000019777|ENSMUSG00000005583|ENSMUSG00000020893|…	http://amigo.geneontology.org/cgi-bin/amigo/term_details?term=GO:0001159
intracellular transport	Gene Ontology	GO:0046907	98	1103	0.000473952	0.00811667	ENSMUSG00000030216|ENSMUSG00000027540|ENSMUSG00000023923|ENSMUSG00000059327|ENSMUSG00000029192|ENSMUSG00000031586|ENSMUSG00000020696|ENSMUSG00000028341|ENSMUSG00000045005|ENSMUSG00000024873|ENSMUSG00000023286|ENSMUSG00000026414|ENSMUSG00000028998|ENSMUSG00000066232|ENSMUSG00000030595|ENSMUSG00000029291|ENSMUSG00000029524|ENSMUSG00000054808|ENSMUSG00000032826|ENSMUSG00000075701|ENSMUSG00000034435|…	http://amigo.geneontology.org/cgi-bin/amigo/term_details?term=GO:0046907
sodium ion transport	Gene Ontology	GO:0006814	24	172	0.000481398	0.00822804	ENSMUSG00000019558|ENSMUSG00000033335|ENSMUSG00000026576|ENSMUSG00000033998|ENSMUSG00000014077|ENSMUSG00000078532|ENSMUSG00000027523|ENSMUSG00000020893|ENSMUSG00000009687|ENSMUSG00000027574|ENSMUSG00000021135|ENSMUSG00000069601|ENSMUSG00000024042|ENSMUSG00000032754|ENSMUSG00000030340|ENSMUSG00000004988|ENSMUSG00000022464|ENSMUSG00000089774|ENSMUSG00000007107|ENSMUSG00000022462|ENSMUSG00000032216|…	http://amigo.geneontology.org/cgi-bin/amigo/term_details?term=GO:0006814
regulation of neuron death	Gene Ontology	GO:1901214	34	284	0.000498707	0.00850724	ENSMUSG00000026826|ENSMUSG00000020300|ENSMUSG00000022383|ENSMUSG00000056501|ENSMUSG00000028341|ENSMUSG00000002985|ENSMUSG00000049313|ENSMUSG00000079056|ENSMUSG00000022307|ENSMUSG00000004054|ENSMUSG00000046949|ENSMUSG00000014077|ENSMUSG00000021285|ENSMUSG00000000753|ENSMUSG00000005583|ENSMUSG00000049001|ENSMUSG00000063142|ENSMUSG00000020053|ENSMUSG00000026812|ENSMUSG00000055737|ENSMUSG00000024500|…	http://amigo.geneontology.org/cgi-bin/amigo/term_details?term=GO:1901214
catabolic process	Gene Ontology	GO:0009056	123	1449	0.00050017	0.00851557	ENSMUSG00000027540|ENSMUSG00000058624|ENSMUSG00000020696|ENSMUSG00000029055|ENSMUSG00000037296|ENSMUSG00000058301|ENSMUSG00000029203|ENSMUSG00000023286|ENSMUSG00000003484|ENSMUSG00000012126|ENSMUSG00000024579|ENSMUSG00000015120|ENSMUSG00000025509|ENSMUSG00000032498|ENSMUSG00000060038|ENSMUSG00000021699|ENSMUSG00000074207|ENSMUSG00000018189|ENSMUSG00000033417|ENSMUSG00000075701|ENSMUSG00000063428|…	http://amigo.geneontology.org/cgi-bin/amigo/term_details?term=GO:0009056
Wnt signaling pathway	Gene Ontology	GO:0016055	39	343	0.000507952	0.00863123	ENSMUSG00000030170|ENSMUSG00000022382|ENSMUSG00000040183|ENSMUSG00000028023|ENSMUSG00000059327|ENSMUSG00000003032|ENSMUSG00000024182|ENSMUSG00000045005|ENSMUSG00000024513|ENSMUSG00000025162|ENSMUSG00000026455|ENSMUSG00000049551|ENSMUSG00000043051|ENSMUSG00000025223|ENSMUSG00000019777|ENSMUSG00000027692|ENSMUSG00000032171|ENSMUSG00000035305|ENSMUSG00000076431|ENSMUSG00000038256|ENSMUSG00000050288|…	http://amigo.geneontology.org/cgi-bin/amigo/term_details?term=GO:0016055
positive regulation of transport	Gene Ontology	GO:0051050	81	877	0.000510203	0.00865264	ENSMUSG00000019970|ENSMUSG00000026825|ENSMUSG00000059208|ENSMUSG00000050395|ENSMUSG00000023923|ENSMUSG00000007655|ENSMUSG00000030216|ENSMUSG00000059327|ENSMUSG00000031586|ENSMUSG00000054808|ENSMUSG00000028341|ENSMUSG00000005534|ENSMUSG00000020790|ENSMUSG00000022528|ENSMUSG00000031302|ENSMUSG00000031565|ENSMUSG00000027584|ENSMUSG00000023286|ENSMUSG00000003484|ENSMUSG00000022200|ENSMUSG00000049313|…	http://amigo.geneontology.org/cgi-bin/amigo/term_details?term=GO:0051050
ion transport	Gene Ontology	GO:0006811	101	1148	0.000531587	0.00897848	ENSMUSG00000062252|ENSMUSG00000020261|ENSMUSG00000037242|ENSMUSG00000024873|ENSMUSG00000022756|ENSMUSG00000003484|ENSMUSG00000024270|ENSMUSG00000031904|ENSMUSG00000005583|ENSMUSG00000020893|ENSMUSG00000063142|ENSMUSG00000032356|ENSMUSG00000028238|ENSMUSG00000026812|ENSMUSG00000032826|ENSMUSG00000026819|ENSMUSG00000024042|ENSMUSG00000031883|ENSMUSG00000031075|ENSMUSG00000007107|ENSMUSG00000054477|…	http://amigo.geneontology.org/cgi-bin/amigo/term_details?term=GO:0006811
response to steroid hormone	Gene Ontology	GO:0048545	28	217	0.0005325	0.00897848	ENSMUSG00000071072|ENSMUSG00000026826|ENSMUSG00000022383|ENSMUSG00000037992|ENSMUSG00000029304|ENSMUSG00000023964|ENSMUSG00000028341|ENSMUSG00000045680|ENSMUSG00000007880|ENSMUSG00000050824|ENSMUSG00000015120|ENSMUSG00000020893|ENSMUSG00000063142|ENSMUSG00000020647|ENSMUSG00000020053|ENSMUSG00000074207|ENSMUSG00000048249|ENSMUSG00000031490|ENSMUSG00000033022|ENSMUSG00000068742|ENSMUSG00000025326|…	http://amigo.geneontology.org/cgi-bin/amigo/term_details?term=GO:0048545
cell-cell signaling by wnt	Gene Ontology	GO:0198738	39	344	0.000534509	0.00899499	ENSMUSG00000030170|ENSMUSG00000022382|ENSMUSG00000040183|ENSMUSG00000028023|ENSMUSG00000059327|ENSMUSG00000003032|ENSMUSG00000024182|ENSMUSG00000045005|ENSMUSG00000024513|ENSMUSG00000025162|ENSMUSG00000026455|ENSMUSG00000049551|ENSMUSG00000043051|ENSMUSG00000025223|ENSMUSG00000019777|ENSMUSG00000027692|ENSMUSG00000032171|ENSMUSG00000035305|ENSMUSG00000076431|ENSMUSG00000038256|ENSMUSG00000050288|…	http://amigo.geneontology.org/cgi-bin/amigo/term_details?term=GO:0198738
sarcomere	Gene Ontology	GO:0030017	21	142	0.000540156	0.00907254	ENSMUSG00000024049|ENSMUSG00000030554|ENSMUSG00000069601|ENSMUSG00000054477|ENSMUSG00000028745|ENSMUSG00000032826|ENSMUSG00000026414|ENSMUSG00000063450|ENSMUSG00000020911|ENSMUSG00000041731|ENSMUSG00000029131|ENSMUSG00000052374|ENSMUSG00000061723|ENSMUSG00000042895|ENSMUSG00000034868|ENSMUSG00000030470|ENSMUSG00000058587|ENSMUSG00000054808|ENSMUSG00000026626|ENSMUSG00000030847|ENSMUSG00000030249	http://amigo.geneontology.org/cgi-bin/amigo/term_details?term=GO:0030017
regulation of anatomical structure size	Gene Ontology	GO:0090066	48	454	0.000552267	0.00925816	ENSMUSG00000033444|ENSMUSG00000057123|ENSMUSG00000070509|ENSMUSG00000033910|ENSMUSG00000022382|ENSMUSG00000029465|ENSMUSG00000033174|ENSMUSG00000030110|ENSMUSG00000041598|ENSMUSG00000053965|ENSMUSG00000049493|ENSMUSG00000029621|ENSMUSG00000033335|ENSMUSG00000037010|ENSMUSG00000001627|ENSMUSG00000031489|ENSMUSG00000043051|ENSMUSG00000052374|ENSMUSG00000002985|ENSMUSG00000021678|ENSMUSG00000038708|…	http://amigo.geneontology.org/cgi-bin/amigo/term_details?term=GO:0090066
negative regulation of cellular response to growth factor stimulus	Gene Ontology	GO:0090288	18	112	0.000555011	0.00928633	ENSMUSG00000050069|ENSMUSG00000031012|ENSMUSG00000032216|ENSMUSG00000019929|ENSMUSG00000037573|ENSMUSG00000027540|ENSMUSG00000024939|ENSMUSG00000031548|ENSMUSG00000024122|ENSMUSG00000037211|ENSMUSG00000033335|ENSMUSG00000031558|ENSMUSG00000029096|ENSMUSG00000092035|ENSMUSG00000007655|ENSMUSG00000044461|ENSMUSG00000032171|ENSMUSG00000033014	http://amigo.geneontology.org/cgi-bin/amigo/term_details?term=GO:0090288
regulation of muscle contraction	Gene Ontology	GO:0006937	19	122	0.00055734	0.00930238	ENSMUSG00000057123|ENSMUSG00000007655|ENSMUSG00000026576|ENSMUSG00000021125|ENSMUSG00000033910|ENSMUSG00000032826|ENSMUSG00000026414|ENSMUSG00000028635|ENSMUSG00000030730|ENSMUSG00000061723|ENSMUSG00000021699|ENSMUSG00000034881|ENSMUSG00000061878|ENSMUSG00000015950|ENSMUSG00000054889|ENSMUSG00000024858|ENSMUSG00000053965|ENSMUSG00000022982|ENSMUSG00000063142	http://amigo.geneontology.org/cgi-bin/amigo/term_details?term=GO:0006937
contractile fiber	Gene Ontology	GO:0043292	24	174	0.0005581	0.00930238	ENSMUSG00000063450|ENSMUSG00000034868|ENSMUSG00000022565|ENSMUSG00000030554|ENSMUSG00000026414|ENSMUSG00000030847|ENSMUSG00000020911|ENSMUSG00000061723|ENSMUSG00000042895|ENSMUSG00000019467|ENSMUSG00000024049|ENSMUSG00000054808|ENSMUSG00000069601|ENSMUSG00000032826|ENSMUSG00000021377|ENSMUSG00000030470|ENSMUSG00000030249|ENSMUSG00000054477|ENSMUSG00000028745|ENSMUSG00000029131|ENSMUSG00000052374|…	http://amigo.geneontology.org/cgi-bin/amigo/term_details?term=GO:0043292
cell development	Gene Ontology	GO:0048468	151	1848	0.000559419	0.00930661	ENSMUSG00000053198|ENSMUSG00000062252|ENSMUSG00000055003|ENSMUSG00000028023|ENSMUSG00000042211|ENSMUSG00000028341|ENSMUSG00000030110|ENSMUSG00000029207|ENSMUSG00000020454|ENSMUSG00000037242|ENSMUSG00000033335|ENSMUSG00000030849|ENSMUSG00000028933|ENSMUSG00000026414|ENSMUSG00000029291|ENSMUSG00000019777|ENSMUSG00000024176|ENSMUSG00000005583|ENSMUSG00000063632|ENSMUSG00000063142|ENSMUSG00000032356|…	http://amigo.geneontology.org/cgi-bin/amigo/term_details?term=GO:0048468
axonogenesis	Gene Ontology	GO:0007409	41	369	0.000563334	0.00935391	ENSMUSG00000026826|ENSMUSG00000020173|ENSMUSG00000022382|ENSMUSG00000020431|ENSMUSG00000030110|ENSMUSG00000027954|ENSMUSG00000033174|ENSMUSG00000043051|ENSMUSG00000028341|ENSMUSG00000028519|ENSMUSG00000029207|ENSMUSG00000031302|ENSMUSG00000027833|ENSMUSG00000002985|ENSMUSG00000033335|ENSMUSG00000030849|ENSMUSG00000001627|ENSMUSG00000049556|ENSMUSG00000017485|ENSMUSG00000023328|ENSMUSG00000038708|…	http://amigo.geneontology.org/cgi-bin/amigo/term_details?term=GO:0007409
positive regulation of Wnt signaling pathway	Gene Ontology	GO:0030177	16	93	0.000576633	0.0095388	ENSMUSG00000024513|ENSMUSG00000025162|ENSMUSG00000032171|ENSMUSG00000030849|ENSMUSG00000076431|ENSMUSG00000031548|ENSMUSG00000040183|ENSMUSG00000030967|ENSMUSG00000059327|ENSMUSG00000043051|ENSMUSG00000019880|ENSMUSG00000026872|ENSMUSG00000022433|ENSMUSG00000007655|ENSMUSG00000051703|ENSMUSG00000038876	http://amigo.geneontology.org/cgi-bin/amigo/term_details?term=GO:0030177
protein import	Gene Ontology	GO:0017038	33	275	0.000576653	0.0095388	ENSMUSG00000059208|ENSMUSG00000020003|ENSMUSG00000009291|ENSMUSG00000059327|ENSMUSG00000050511|ENSMUSG00000031586|ENSMUSG00000022528|ENSMUSG00000045969|ENSMUSG00000019942|ENSMUSG00000045733|ENSMUSG00000010517|ENSMUSG00000002985|ENSMUSG00000042895|ENSMUSG00000066232|ENSMUSG00000026778|ENSMUSG00000014077|ENSMUSG00000030595|ENSMUSG00000021025|ENSMUSG00000020053|ENSMUSG00000028998|ENSMUSG00000009640|…	http://amigo.geneontology.org/cgi-bin/amigo/term_details?term=GO:0017038
embryonic eye morphogenesis	Gene Ontology	GO:0048048	9	33	0.000589555	0.00973379	ENSMUSG00000020170|ENSMUSG00000007880|ENSMUSG00000045005|ENSMUSG00000053279|ENSMUSG00000024182|ENSMUSG00000015134|ENSMUSG00000032327|ENSMUSG00000038402|ENSMUSG00000063632	http://amigo.geneontology.org/cgi-bin/amigo/term_details?term=GO:0048048
cellular component disassembly	Gene Ontology	GO:0022411	40	358	0.000592168	0.00975184	ENSMUSG00000033444|ENSMUSG00000030216|ENSMUSG00000002546|ENSMUSG00000028207|ENSMUSG00000032489|ENSMUSG00000021338|ENSMUSG00000023923|ENSMUSG00000015837|ENSMUSG00000045005|ENSMUSG00000058301|ENSMUSG00000026576|ENSMUSG00000042265|ENSMUSG00000041459|ENSMUSG00000019942|ENSMUSG00000050212|ENSMUSG00000028998|ENSMUSG00000025220|ENSMUSG00000048373|ENSMUSG00000005320|ENSMUSG00000038642|ENSMUSG00000020227|…	http://amigo.geneontology.org/cgi-bin/amigo/term_details?term=GO:0022411
epithelial cell differentiation	Gene Ontology	GO:0030855	51	493	0.000593761	0.00975184	ENSMUSG00000020170|ENSMUSG00000062252|ENSMUSG00000021466|ENSMUSG00000022382|ENSMUSG00000037992|ENSMUSG00000031207|ENSMUSG00000042622|ENSMUSG00000029381|ENSMUSG00000003032|ENSMUSG00000003031|ENSMUSG00000056501|ENSMUSG00000045680|ENSMUSG00000022528|ENSMUSG00000037025|ENSMUSG00000031565|ENSMUSG00000004207|ENSMUSG00000030849|ENSMUSG00000045545|ENSMUSG00000037242|ENSMUSG00000054889|ENSMUSG00000022982|…	http://amigo.geneontology.org/cgi-bin/amigo/term_details?term=GO:0030855
cell body	Gene Ontology	GO:0044297	60	607	0.000593998	0.00975184	ENSMUSG00000071072|ENSMUSG00000020173|ENSMUSG00000049313|ENSMUSG00000037992|ENSMUSG00000030110|ENSMUSG00000026304|ENSMUSG00000023964|ENSMUSG00000048904|ENSMUSG00000071658|ENSMUSG00000028519|ENSMUSG00000005534|ENSMUSG00000031302|ENSMUSG00000020053|ENSMUSG00000002985|ENSMUSG00000027947|ENSMUSG00000000881|ENSMUSG00000029484|ENSMUSG00000043613|ENSMUSG00000043051|ENSMUSG00000037296|ENSMUSG00000023328|…	http://amigo.geneontology.org/cgi-bin/amigo/term_details?term=GO:0044297
embryonic placenta morphogenesis	Gene Ontology	GO:0060669	8	26	0.000609629	0.0099824	ENSMUSG00000030849|ENSMUSG00000022382|ENSMUSG00000029131|ENSMUSG00000019880|ENSMUSG00000020647|ENSMUSG00000022286|ENSMUSG00000045005|ENSMUSG00000020782	http://amigo.geneontology.org/cgi-bin/amigo/term_details?term=GO:0060669
camera-type eye development	Gene Ontology	GO:0043010	33	276	0.000610328	0.0099824	ENSMUSG00000020170|ENSMUSG00000037992|ENSMUSG00000021264|ENSMUSG00000053279|ENSMUSG00000028023|ENSMUSG00000003032|ENSMUSG00000003031|ENSMUSG00000038402|ENSMUSG00000045005|ENSMUSG00000047407|ENSMUSG00000030849|ENSMUSG00000029669|ENSMUSG00000007880|ENSMUSG00000037242|ENSMUSG00000022656|ENSMUSG00000023328|ENSMUSG00000019777|ENSMUSG00000022286|ENSMUSG00000063632|ENSMUSG00000024176|ENSMUSG00000066975|…	http://amigo.geneontology.org/cgi-bin/amigo/term_details?term=GO:0043010
labyrinthine layer development	Gene Ontology	GO:0060711	11	49	0.000622826	0.0101488	ENSMUSG00000030849|ENSMUSG00000022382|ENSMUSG00000020937|ENSMUSG00000024440|ENSMUSG00000029131|ENSMUSG00000019880|ENSMUSG00000020647|ENSMUSG00000022528|ENSMUSG00000022286|ENSMUSG00000045005|ENSMUSG00000020782	http://amigo.geneontology.org/cgi-bin/amigo/term_details?term=GO:0060711
non-canonical Wnt signaling pathway	Gene Ontology	GO:0035567	11	49	0.000622826	0.0101488	ENSMUSG00000025162|ENSMUSG00000022382|ENSMUSG00000049551|ENSMUSG00000031548|ENSMUSG00000040183|ENSMUSG00000050288|ENSMUSG00000003233|ENSMUSG00000015957|ENSMUSG00000019880|ENSMUSG00000022433|ENSMUSG00000045005	http://amigo.geneontology.org/cgi-bin/amigo/term_details?term=GO:0035567
cell morphogenesis involved in differentiation	Gene Ontology	GO:0000904	66	686	0.000627987	0.0102138	ENSMUSG00000062252|ENSMUSG00000026826|ENSMUSG00000020173|ENSMUSG00000021360|ENSMUSG00000022382|ENSMUSG00000020431|ENSMUSG00000030110|ENSMUSG00000031548|ENSMUSG00000033420|ENSMUSG00000027954|ENSMUSG00000033174|ENSMUSG00000043051|ENSMUSG00000054808|ENSMUSG00000055003|ENSMUSG00000028341|ENSMUSG00000028519|ENSMUSG00000032083|ENSMUSG00000022528|ENSMUSG00000029207|ENSMUSG00000031302|ENSMUSG00000037242|…	http://amigo.geneontology.org/cgi-bin/amigo/term_details?term=GO:0000904
neural tube development	Gene Ontology	GO:0021915	23	165	0.000632256	0.0102642	ENSMUSG00000020173|ENSMUSG00000037992|ENSMUSG00000021466|ENSMUSG00000022528|ENSMUSG00000037025|ENSMUSG00000007880|ENSMUSG00000058886|ENSMUSG00000070509|ENSMUSG00000022286|ENSMUSG00000063632|ENSMUSG00000026812|ENSMUSG00000076431|ENSMUSG00000026640|ENSMUSG00000050288|ENSMUSG00000026872|ENSMUSG00000039765|ENSMUSG00000060733|ENSMUSG00000036180|ENSMUSG00000019979|ENSMUSG00000031548|ENSMUSG00000029381|…	http://amigo.geneontology.org/cgi-bin/amigo/term_details?term=GO:0021915
axon development	Gene Ontology	GO:0061564	43	396	0.000642896	0.0104175	ENSMUSG00000026826|ENSMUSG00000020173|ENSMUSG00000022382|ENSMUSG00000020431|ENSMUSG00000030110|ENSMUSG00000027954|ENSMUSG00000033174|ENSMUSG00000043051|ENSMUSG00000028341|ENSMUSG00000028519|ENSMUSG00000029207|ENSMUSG00000031302|ENSMUSG00000027833|ENSMUSG00000002985|ENSMUSG00000030657|ENSMUSG00000030849|ENSMUSG00000001627|ENSMUSG00000049556|ENSMUSG00000017485|ENSMUSG00000023328|ENSMUSG00000038708|…	http://amigo.geneontology.org/cgi-bin/amigo/term_details?term=GO:0061564
osteoblast differentiation	Gene Ontology	GO:0001649	25	187	0.000652457	0.0105529	ENSMUSG00000048583|ENSMUSG00000019359|ENSMUSG00000022382|ENSMUSG00000029304|ENSMUSG00000056501|ENSMUSG00000031565|ENSMUSG00000027833|ENSMUSG00000015957|ENSMUSG00000031681|ENSMUSG00000013622|ENSMUSG00000027523|ENSMUSG00000024176|ENSMUSG00000005583|ENSMUSG00000063632|ENSMUSG00000020053|ENSMUSG00000021466|ENSMUSG00000039153|ENSMUSG00000001419|ENSMUSG00000029335|ENSMUSG00000027803|ENSMUSG00000037573|…	http://amigo.geneontology.org/cgi-bin/amigo/term_details?term=GO:0001649
cellular protein complex assembly	Gene Ontology	GO:0043623	46	434	0.000678867	0.0109598	ENSMUSG00000026825|ENSMUSG00000020173|ENSMUSG00000026491|ENSMUSG00000006304|ENSMUSG00000030319|ENSMUSG00000034706|ENSMUSG00000021573|ENSMUSG00000058624|ENSMUSG00000028552|ENSMUSG00000031753|ENSMUSG00000003031|ENSMUSG00000024182|ENSMUSG00000029203|ENSMUSG00000025487|ENSMUSG00000024513|ENSMUSG00000029621|ENSMUSG00000022553|ENSMUSG00000039959|ENSMUSG00000049550|ENSMUSG00000031681|ENSMUSG00000050323|…	http://amigo.geneontology.org/cgi-bin/amigo/term_details?term=GO:0043623
positive regulation of cell morphogenesis involved in differentiation	Gene Ontology	GO:0010770	23	166	0.000680983	0.0109736	ENSMUSG00000006304|ENSMUSG00000021360|ENSMUSG00000032083|ENSMUSG00000027833|ENSMUSG00000018411|ENSMUSG00000033335|ENSMUSG00000043051|ENSMUSG00000023328|ENSMUSG00000038708|ENSMUSG00000029291|ENSMUSG00000019777|ENSMUSG00000022018|ENSMUSG00000021338|ENSMUSG00000059146|ENSMUSG00000061751|ENSMUSG00000039621|ENSMUSG00000026872|ENSMUSG00000027803|ENSMUSG00000002546|ENSMUSG00000019970|ENSMUSG00000026235|…	http://amigo.geneontology.org/cgi-bin/amigo/term_details?term=GO:0010770
cell cortex	Gene Ontology	GO:0005938	25	188	0.000699183	0.0112462	ENSMUSG00000020173|ENSMUSG00000028207|ENSMUSG00000070880|ENSMUSG00000054808|ENSMUSG00000052374|ENSMUSG00000028645|ENSMUSG00000049493|ENSMUSG00000030849|ENSMUSG00000026288|ENSMUSG00000020911|ENSMUSG00000032010|ENSMUSG00000036923|ENSMUSG00000069662|ENSMUSG00000026812|ENSMUSG00000038366|ENSMUSG00000030244|ENSMUSG00000030340|ENSMUSG00000020782|ENSMUSG00000027598|ENSMUSG00000028745|ENSMUSG00000028906|…	http://amigo.geneontology.org/cgi-bin/amigo/term_details?term=GO:0005938
regulation of peptidyl-threonine phosphorylation	Gene Ontology	GO:0010799	9	34	0.000707476	0.0113586	ENSMUSG00000061878|ENSMUSG00000036923|ENSMUSG00000029410|ENSMUSG00000036707|ENSMUSG00000024182|ENSMUSG00000000394|ENSMUSG00000020108|ENSMUSG00000045671|ENSMUSG00000029203	http://amigo.geneontology.org/cgi-bin/amigo/term_details?term=GO:0010799
vesicle-mediated transport	Gene Ontology	GO:0016192	88	982	0.000713201	0.0114295	ENSMUSG00000027540|ENSMUSG00000023923|ENSMUSG00000029192|ENSMUSG00000016528|ENSMUSG00000024873|ENSMUSG00000033335|ENSMUSG00000030849|ENSMUSG00000039959|ENSMUSG00000001768|ENSMUSG00000018672|ENSMUSG00000054808|ENSMUSG00000035325|ENSMUSG00000022791|ENSMUSG00000025326|ENSMUSG00000026304|ENSMUSG00000031504|ENSMUSG00000030616|ENSMUSG00000017288|ENSMUSG00000054277|ENSMUSG00000026155|ENSMUSG00000026825|…	http://amigo.geneontology.org/cgi-bin/amigo/term_details?term=GO:0016192
regulation of protein secretion	Gene Ontology	GO:0050708	40	362	0.000719757	0.0115135	ENSMUSG00000020053|ENSMUSG00000057123|ENSMUSG00000031488|ENSMUSG00000002897|ENSMUSG00000032083|ENSMUSG00000026778|ENSMUSG00000015568|ENSMUSG00000020848|ENSMUSG00000033685|ENSMUSG00000023349|ENSMUSG00000022200|ENSMUSG00000050395|ENSMUSG00000044811|ENSMUSG00000042682|ENSMUSG00000003184|ENSMUSG00000025220|ENSMUSG00000031842|ENSMUSG00000049044|ENSMUSG00000035621|ENSMUSG00000050824|ENSMUSG00000022018|…	http://amigo.geneontology.org/cgi-bin/amigo/term_details?term=GO:0050708
cellular response to molecule of bacterial origin	Gene Ontology	GO:0071219	19	125	0.000724613	0.01157	ENSMUSG00000031392|ENSMUSG00000005583|ENSMUSG00000015243|ENSMUSG00000015305|ENSMUSG00000037992|ENSMUSG00000034610|ENSMUSG00000003184|ENSMUSG00000032501|ENSMUSG00000075701|ENSMUSG00000026234|ENSMUSG00000021699|ENSMUSG00000034881|ENSMUSG00000056501|ENSMUSG00000030595|ENSMUSG00000021025|ENSMUSG00000023992|ENSMUSG00000038147|ENSMUSG00000045005|ENSMUSG00000058301	http://amigo.geneontology.org/cgi-bin/amigo/term_details?term=GO:0071219
bone development	Gene Ontology	GO:0060348	23	167	0.000732939	0.0116816	ENSMUSG00000037992|ENSMUSG00000020003|ENSMUSG00000028023|ENSMUSG00000025856|ENSMUSG00000026737|ENSMUSG00000016382|ENSMUSG00000027833|ENSMUSG00000030849|ENSMUSG00000031681|ENSMUSG00000024039|ENSMUSG00000027523|ENSMUSG00000005583|ENSMUSG00000020053|ENSMUSG00000058835|ENSMUSG00000037962|ENSMUSG00000039153|ENSMUSG00000001419|ENSMUSG00000024940|ENSMUSG00000030579|ENSMUSG00000045672|ENSMUSG00000005514|…	http://amigo.geneontology.org/cgi-bin/amigo/term_details?term=GO:0060348
catalytic complex	Gene Ontology	GO:1902494	82	904	0.000773433	0.0123045	ENSMUSG00000034165|ENSMUSG00000026576|ENSMUSG00000023923|ENSMUSG00000020263|ENSMUSG00000052144|ENSMUSG00000069495|ENSMUSG00000054978|ENSMUSG00000078923|ENSMUSG00000028212|ENSMUSG00000057469|ENSMUSG00000020107|ENSMUSG00000020649|ENSMUSG00000004789|ENSMUSG00000005534|ENSMUSG00000017548|ENSMUSG00000022561|ENSMUSG00000042032|ENSMUSG00000023286|ENSMUSG00000026283|ENSMUSG00000026455|ENSMUSG00000025893|…	http://amigo.geneontology.org/cgi-bin/amigo/term_details?term=GO:1902494
modification-dependent protein catabolic process	Gene Ontology	GO:0019941	48	462	0.000778491	0.0123624	ENSMUSG00000043051|ENSMUSG00000022433|ENSMUSG00000020696|ENSMUSG00000015837|ENSMUSG00000029203|ENSMUSG00000025487|ENSMUSG00000023286|ENSMUSG00000025162|ENSMUSG00000002102|ENSMUSG00000032010|ENSMUSG00000010517|ENSMUSG00000032501|ENSMUSG00000012126|ENSMUSG00000032405|ENSMUSG00000014074|ENSMUSG00000013622|ENSMUSG00000024579|ENSMUSG00000015120|ENSMUSG00000038175|ENSMUSG00000036822|ENSMUSG00000039159|…	http://amigo.geneontology.org/cgi-bin/amigo/term_details?term=GO:0019941
embryonic placenta development	Gene Ontology	GO:0001892	16	96	0.000780838	0.0123772	ENSMUSG00000061082|ENSMUSG00000020911|ENSMUSG00000030849|ENSMUSG00000022382|ENSMUSG00000020937|ENSMUSG00000024440|ENSMUSG00000010760|ENSMUSG00000029131|ENSMUSG00000019880|ENSMUSG00000022335|ENSMUSG00000020647|ENSMUSG00000022528|ENSMUSG00000022286|ENSMUSG00000045005|ENSMUSG00000020782|ENSMUSG00000056501	http://amigo.geneontology.org/cgi-bin/amigo/term_details?term=GO:0001892
cadherin binding	Gene Ontology	GO:0045296	31	258	0.000816487	0.0128722	ENSMUSG00000027540|ENSMUSG00000028552|ENSMUSG00000033031|ENSMUSG00000016487|ENSMUSG00000022565|ENSMUSG00000031928|ENSMUSG00000025162|ENSMUSG00000030847|ENSMUSG00000004591|ENSMUSG00000025504|ENSMUSG00000039457|ENSMUSG00000021282|ENSMUSG00000009687|ENSMUSG00000058835|ENSMUSG00000069601|ENSMUSG00000029407|ENSMUSG00000038366|ENSMUSG00000024941|ENSMUSG00000029086|ENSMUSG00000051695|ENSMUSG00000042426|…	http://amigo.geneontology.org/cgi-bin/amigo/term_details?term=GO:0045296
peptidyl-lysine modification	Gene Ontology	GO:0018205	31	258	0.000816487	0.0128722	ENSMUSG00000037808|ENSMUSG00000056770|ENSMUSG00000002052|ENSMUSG00000041975|ENSMUSG00000017548|ENSMUSG00000026283|ENSMUSG00000010453|ENSMUSG00000025223|ENSMUSG00000032405|ENSMUSG00000004698|ENSMUSG00000025266|ENSMUSG00000015120|ENSMUSG00000020893|ENSMUSG00000000394|ENSMUSG00000036822|ENSMUSG00000029524|ENSMUSG00000060038|ENSMUSG00000030087|ENSMUSG00000076431|ENSMUSG00000045098|ENSMUSG00000009640|…	http://amigo.geneontology.org/cgi-bin/amigo/term_details?term=GO:0018205
single-organism cellular localization	Gene Ontology	GO:1902580	77	839	0.000818542	0.0128813	ENSMUSG00000026825|ENSMUSG00000019942|ENSMUSG00000024182|ENSMUSG00000021466|ENSMUSG00000063077|ENSMUSG00000045733|ENSMUSG00000063450|ENSMUSG00000020003|ENSMUSG00000009291|ENSMUSG00000059327|ENSMUSG00000050511|ENSMUSG00000031586|ENSMUSG00000023964|ENSMUSG00000054808|ENSMUSG00000028341|ENSMUSG00000014776|ENSMUSG00000022982|ENSMUSG00000022528|ENSMUSG00000000881|ENSMUSG00000020848|ENSMUSG00000024873|…	http://amigo.geneontology.org/cgi-bin/amigo/term_details?term=GO:1902580
positive regulation of protein transport	Gene Ontology	GO:0051222	45	426	0.000821809	0.0129095	ENSMUSG00000059208|ENSMUSG00000050395|ENSMUSG00000030216|ENSMUSG00000059327|ENSMUSG00000031586|ENSMUSG00000022528|ENSMUSG00000015568|ENSMUSG00000020848|ENSMUSG00000023286|ENSMUSG00000023349|ENSMUSG00000022200|ENSMUSG00000049313|ENSMUSG00000044811|ENSMUSG00000045005|ENSMUSG00000019942|ENSMUSG00000003184|ENSMUSG00000028998|ENSMUSG00000025220|ENSMUSG00000026778|ENSMUSG00000014077|ENSMUSG00000029291|…	http://amigo.geneontology.org/cgi-bin/amigo/term_details?term=GO:0051222
protein ubiquitination	Gene Ontology	GO:0016567	51	501	0.000823513	0.012913	ENSMUSG00000090213|ENSMUSG00000030319|ENSMUSG00000021712|ENSMUSG00000078923|ENSMUSG00000020696|ENSMUSG00000017548|ENSMUSG00000027803|ENSMUSG00000029203|ENSMUSG00000033014|ENSMUSG00000023286|ENSMUSG00000026455|ENSMUSG00000043051|ENSMUSG00000032501|ENSMUSG00000014077|ENSMUSG00000022750|ENSMUSG00000025266|ENSMUSG00000040782|ENSMUSG00000038175|ENSMUSG00000026637|ENSMUSG00000036822|ENSMUSG00000039159|…	http://amigo.geneontology.org/cgi-bin/amigo/term_details?term=GO:0016567
regulation of cytokine production	Gene Ontology	GO:0001817	50	489	0.000843584	0.013186	ENSMUSG00000016528|ENSMUSG00000050395|ENSMUSG00000037992|ENSMUSG00000026234|ENSMUSG00000003032|ENSMUSG00000056501|ENSMUSG00000028341|ENSMUSG00000032083|ENSMUSG00000015568|ENSMUSG00000031565|ENSMUSG00000020823|ENSMUSG00000023349|ENSMUSG00000032688|ENSMUSG00000049130|ENSMUSG00000044811|ENSMUSG00000045005|ENSMUSG00000043496|ENSMUSG00000034610|ENSMUSG00000003184|ENSMUSG00000015957|ENSMUSG00000026778|…	http://amigo.geneontology.org/cgi-bin/amigo/term_details?term=GO:0001817
negative regulation of response to cytokine stimulus	Gene Ontology	GO:0060761	9	35	0.000843939	0.013186	ENSMUSG00000007655|ENSMUSG00000021678|ENSMUSG00000003032|ENSMUSG00000020696|ENSMUSG00000031558|ENSMUSG00000032083|ENSMUSG00000020227|ENSMUSG00000026073|ENSMUSG00000014776	http://amigo.geneontology.org/cgi-bin/amigo/term_details?term=GO:0060761
morphogenesis of a branching epithelium	Gene Ontology	GO:0061138	26	202	0.000852937	0.0132786	ENSMUSG00000020170|ENSMUSG00000022382|ENSMUSG00000030218|ENSMUSG00000028023|ENSMUSG00000025856|ENSMUSG00000045680|ENSMUSG00000037025|ENSMUSG00000037242|ENSMUSG00000040728|ENSMUSG00000030849|ENSMUSG00000045005|ENSMUSG00000032359|ENSMUSG00000031565|ENSMUSG00000024176|ENSMUSG00000022286|ENSMUSG00000020053|ENSMUSG00000021466|ENSMUSG00000030084|ENSMUSG00000064325|ENSMUSG00000037211|ENSMUSG00000022510|…	http://amigo.geneontology.org/cgi-bin/amigo/term_details?term=GO:0061138
regulation of mitotic cell cycle phase transition	Gene Ontology	GO:1901990	24	180	0.000855711	0.0132786	ENSMUSG00000036923|ENSMUSG00000030094|ENSMUSG00000048904|ENSMUSG00000034683|ENSMUSG00000002871|ENSMUSG00000031928|ENSMUSG00000078429|ENSMUSG00000029022|ENSMUSG00000030649|ENSMUSG00000019942|ENSMUSG00000028999|ENSMUSG00000026778|ENSMUSG00000022750|ENSMUSG00000028821|ENSMUSG00000022018|ENSMUSG00000076431|ENSMUSG00000022510|ENSMUSG00000031095|ENSMUSG00000061288|ENSMUSG00000025764|ENSMUSG00000073802|…	http://amigo.geneontology.org/cgi-bin/amigo/term_details?term=GO:1901990
regulation of nucleotide metabolic process	Gene Ontology	GO:0006140	24	180	0.000855711	0.0132786	ENSMUSG00000033910|ENSMUSG00000031489|ENSMUSG00000020431|ENSMUSG00000006575|ENSMUSG00000023964|ENSMUSG00000005534|ENSMUSG00000053965|ENSMUSG00000027584|ENSMUSG00000024039|ENSMUSG00000022383|ENSMUSG00000002985|ENSMUSG00000027523|ENSMUSG00000000394|ENSMUSG00000020053|ENSMUSG00000021699|ENSMUSG00000015243|ENSMUSG00000016194|ENSMUSG00000050288|ENSMUSG00000028756|ENSMUSG00000004040|ENSMUSG00000040407|…	http://amigo.geneontology.org/cgi-bin/amigo/term_details?term=GO:0006140
protein modification by small protein conjugation	Gene Ontology	GO:0032446	54	540	0.000855946	0.0132786	ENSMUSG00000090213|ENSMUSG00000030319|ENSMUSG00000021712|ENSMUSG00000078923|ENSMUSG00000020696|ENSMUSG00000017548|ENSMUSG00000027803|ENSMUSG00000029203|ENSMUSG00000033014|ENSMUSG00000023286|ENSMUSG00000026455|ENSMUSG00000043051|ENSMUSG00000032501|ENSMUSG00000032405|ENSMUSG00000014077|ENSMUSG00000022750|ENSMUSG00000025266|ENSMUSG00000015120|ENSMUSG00000038175|ENSMUSG00000026637|ENSMUSG00000036822|…	http://amigo.geneontology.org/cgi-bin/amigo/term_details?term=GO:0032446
histone deacetylase binding	Gene Ontology	GO:0042826	16	97	0.000861325	0.0133383	ENSMUSG00000021264|ENSMUSG00000039153|ENSMUSG00000017485|ENSMUSG00000037992|ENSMUSG00000024042|ENSMUSG00000045680|ENSMUSG00000004591|ENSMUSG00000001419|ENSMUSG00000003032|ENSMUSG00000025626|ENSMUSG00000066613|ENSMUSG00000056501|ENSMUSG00000048490|ENSMUSG00000004698|ENSMUSG00000022528|ENSMUSG00000005583	http://amigo.geneontology.org/cgi-bin/amigo/term_details?term=GO:0042826
chromatin binding	Gene Ontology	GO:0003682	47	452	0.000864006	0.0133562	ENSMUSG00000024335|ENSMUSG00000037992|ENSMUSG00000028023|ENSMUSG00000048904|ENSMUSG00000056501|ENSMUSG00000022528|ENSMUSG00000017485|ENSMUSG00000058301|ENSMUSG00000024513|ENSMUSG00000026283|ENSMUSG00000028639|ENSMUSG00000007880|ENSMUSG00000006288|ENSMUSG00000019942|ENSMUSG00000017548|ENSMUSG00000025223|ENSMUSG00000017007|ENSMUSG00000062563|ENSMUSG00000014074|ENSMUSG00000020656|ENSMUSG00000019777|…	http://amigo.geneontology.org/cgi-bin/amigo/term_details?term=GO:0003682
positive regulation of cell development	Gene Ontology	GO:0010720	52	515	0.000869325	0.0134146	ENSMUSG00000020027|ENSMUSG00000020173|ENSMUSG00000070509|ENSMUSG00000006304|ENSMUSG00000037992|ENSMUSG00000030110|ENSMUSG00000042211|ENSMUSG00000048904|ENSMUSG00000021360|ENSMUSG00000028519|ENSMUSG00000032083|ENSMUSG00000022528|ENSMUSG00000031302|ENSMUSG00000031565|ENSMUSG00000027833|ENSMUSG00000002985|ENSMUSG00000033335|ENSMUSG00000028933|ENSMUSG00000053965|ENSMUSG00000043051|ENSMUSG00000028176|…	http://amigo.geneontology.org/cgi-bin/amigo/term_details?term=GO:0010720
cellular response to lipopolysaccharide	Gene Ontology	GO:0071222	18	117	0.000872652	0.0134422	ENSMUSG00000031392|ENSMUSG00000005583|ENSMUSG00000015243|ENSMUSG00000015305|ENSMUSG00000037992|ENSMUSG00000034610|ENSMUSG00000003184|ENSMUSG00000032501|ENSMUSG00000075701|ENSMUSG00000026234|ENSMUSG00000021699|ENSMUSG00000034881|ENSMUSG00000056501|ENSMUSG00000030595|ENSMUSG00000021025|ENSMUSG00000023992|ENSMUSG00000038147|ENSMUSG00000058301	http://amigo.geneontology.org/cgi-bin/amigo/term_details?term=GO:0071222
regulation of osteoblast differentiation	Gene Ontology	GO:0045667	17	107	0.000874596	0.0134485	ENSMUSG00000020053|ENSMUSG00000021466|ENSMUSG00000019359|ENSMUSG00000022382|ENSMUSG00000031565|ENSMUSG00000039153|ENSMUSG00000031548|ENSMUSG00000031681|ENSMUSG00000037573|ENSMUSG00000017119|ENSMUSG00000022510|ENSMUSG00000056501|ENSMUSG00000027523|ENSMUSG00000013622|ENSMUSG00000066613|ENSMUSG00000005583|ENSMUSG00000063632	http://amigo.geneontology.org/cgi-bin/amigo/term_details?term=GO:0045667
microtubule	Gene Ontology	GO:0005874	38	342	0.000878595	0.0134862	ENSMUSG00000072825|ENSMUSG00000026825|ENSMUSG00000049550|ENSMUSG00000032489|ENSMUSG00000063077|ENSMUSG00000034706|ENSMUSG00000021573|ENSMUSG00000043051|ENSMUSG00000028572|ENSMUSG00000018411|ENSMUSG00000025162|ENSMUSG00000033335|ENSMUSG00000019942|ENSMUSG00000024277|ENSMUSG00000004054|ENSMUSG00000002985|ENSMUSG00000039450|ENSMUSG00000022750|ENSMUSG00000024175|ENSMUSG00000025228|ENSMUSG00000031788|…	http://amigo.geneontology.org/cgi-bin/amigo/term_details?term=GO:0005874
cytokine production	Gene Ontology	GO:0001816	54	541	0.000889453	0.0136289	ENSMUSG00000016528|ENSMUSG00000050395|ENSMUSG00000037992|ENSMUSG00000026234|ENSMUSG00000003032|ENSMUSG00000056501|ENSMUSG00000028341|ENSMUSG00000032083|ENSMUSG00000015568|ENSMUSG00000031565|ENSMUSG00000020823|ENSMUSG00000023349|ENSMUSG00000042265|ENSMUSG00000049130|ENSMUSG00000044811|ENSMUSG00000045005|ENSMUSG00000043496|ENSMUSG00000034610|ENSMUSG00000003184|ENSMUSG00000015957|ENSMUSG00000031785|…	http://amigo.geneontology.org/cgi-bin/amigo/term_details?term=GO:0001816
multicellular organism growth	Gene Ontology	GO:0035264	22	159	0.000894903	0.0136884	ENSMUSG00000048583|ENSMUSG00000020027|ENSMUSG00000031489|ENSMUSG00000037992|ENSMUSG00000021466|ENSMUSG00000037242|ENSMUSG00000049493|ENSMUSG00000030849|ENSMUSG00000028933|ENSMUSG00000020782|ENSMUSG00000078650|ENSMUSG00000027523|ENSMUSG00000022286|ENSMUSG00000020053|ENSMUSG00000021699|ENSMUSG00000055737|ENSMUSG00000026819|ENSMUSG00000027803|ENSMUSG00000022982|ENSMUSG00000031545|ENSMUSG00000030779|…	http://amigo.geneontology.org/cgi-bin/amigo/term_details?term=GO:0035264
embryonic camera-type eye morphogenesis	Gene Ontology	GO:0048596	8	28	0.000915863	0.0139845	ENSMUSG00000020170|ENSMUSG00000007880|ENSMUSG00000045005|ENSMUSG00000053279|ENSMUSG00000015134|ENSMUSG00000032327|ENSMUSG00000038402|ENSMUSG00000063632	http://amigo.geneontology.org/cgi-bin/amigo/term_details?term=GO:0048596
eye development	Gene Ontology	GO:0001654	36	319	0.000922103	0.0140552	ENSMUSG00000020170|ENSMUSG00000037992|ENSMUSG00000021264|ENSMUSG00000053279|ENSMUSG00000028023|ENSMUSG00000003032|ENSMUSG00000003031|ENSMUSG00000038402|ENSMUSG00000045005|ENSMUSG00000047407|ENSMUSG00000030849|ENSMUSG00000029669|ENSMUSG00000007880|ENSMUSG00000037242|ENSMUSG00000022656|ENSMUSG00000023328|ENSMUSG00000019777|ENSMUSG00000022286|ENSMUSG00000063632|ENSMUSG00000024176|ENSMUSG00000026663|…	http://amigo.geneontology.org/cgi-bin/amigo/term_details?term=GO:0001654
blood vessel development	Gene Ontology	GO:0001568	55	555	0.000932047	0.0141821	ENSMUSG00000057123|ENSMUSG00000022382|ENSMUSG00000028023|ENSMUSG00000025856|ENSMUSG00000027954|ENSMUSG00000003032|ENSMUSG00000028782|ENSMUSG00000045680|ENSMUSG00000022528|ENSMUSG00000031565|ENSMUSG00000032327|ENSMUSG00000031785|ENSMUSG00000033335|ENSMUSG00000030849|ENSMUSG00000029669|ENSMUSG00000029484|ENSMUSG00000037242|ENSMUSG00000020937|ENSMUSG00000026234|ENSMUSG00000036144|ENSMUSG00000015957|…	http://amigo.geneontology.org/cgi-bin/amigo/term_details?term=GO:0001568
nucleotide metabolic process	Gene Ontology	GO:0009117	49	479	0.000936781	0.0142293	ENSMUSG00000022383|ENSMUSG00000031489|ENSMUSG00000020431|ENSMUSG00000006575|ENSMUSG00000040181|ENSMUSG00000023964|ENSMUSG00000004789|ENSMUSG00000005534|ENSMUSG00000003072|ENSMUSG00000030651|ENSMUSG00000045211|ENSMUSG00000027584|ENSMUSG00000025630|ENSMUSG00000026576|ENSMUSG00000033910|ENSMUSG00000025041|ENSMUSG00000053965|ENSMUSG00000070385|ENSMUSG00000002985|ENSMUSG00000039450|ENSMUSG00000025220|…	http://amigo.geneontology.org/cgi-bin/amigo/term_details?term=GO:0009117
ubiquitin-dependent protein catabolic process	Gene Ontology	GO:0006511	47	454	0.000939742	0.0142495	ENSMUSG00000043051|ENSMUSG00000022433|ENSMUSG00000020696|ENSMUSG00000015837|ENSMUSG00000029203|ENSMUSG00000025487|ENSMUSG00000023286|ENSMUSG00000025162|ENSMUSG00000002102|ENSMUSG00000032010|ENSMUSG00000010517|ENSMUSG00000032501|ENSMUSG00000012126|ENSMUSG00000032405|ENSMUSG00000014074|ENSMUSG00000013622|ENSMUSG00000015120|ENSMUSG00000038175|ENSMUSG00000036822|ENSMUSG00000039159|ENSMUSG00000030083|…	http://amigo.geneontology.org/cgi-bin/amigo/term_details?term=GO:0006511
single-organism behavior	Gene Ontology	GO:0044708	44	417	0.000952163	0.0144128	ENSMUSG00000048583|ENSMUSG00000026825|ENSMUSG00000026826|ENSMUSG00000022383|ENSMUSG00000020431|ENSMUSG00000070880|ENSMUSG00000050511|ENSMUSG00000028341|ENSMUSG00000028519|ENSMUSG00000031302|ENSMUSG00000053965|ENSMUSG00000018411|ENSMUSG00000037025|ENSMUSG00000079056|ENSMUSG00000049551|ENSMUSG00000025630|ENSMUSG00000058886|ENSMUSG00000032405|ENSMUSG00000015090|ENSMUSG00000000753|ENSMUSG00000005583|…	http://amigo.geneontology.org/cgi-bin/amigo/term_details?term=GO:0044708
regulation of cytoskeleton organization	Gene Ontology	GO:0051493	40	368	0.000956763	0.0144345	ENSMUSG00000033444|ENSMUSG00000032812|ENSMUSG00000021338|ENSMUSG00000019970|ENSMUSG00000058624|ENSMUSG00000026812|ENSMUSG00000032083|ENSMUSG00000052374|ENSMUSG00000030562|ENSMUSG00000018411|ENSMUSG00000029621|ENSMUSG00000004814|ENSMUSG00000038013|ENSMUSG00000049550|ENSMUSG00000029465|ENSMUSG00000026778|ENSMUSG00000019777|ENSMUSG00000005583|ENSMUSG00000022018|ENSMUSG00000045092|ENSMUSG00000030220|…	http://amigo.geneontology.org/cgi-bin/amigo/term_details?term=GO:0051493
positive regulation of JNK cascade	Gene Ontology	GO:0046330	17	108	0.000958358	0.0144345	ENSMUSG00000031392|ENSMUSG00000036390|ENSMUSG00000015305|ENSMUSG00000033542|ENSMUSG00000021678|ENSMUSG00000061288|ENSMUSG00000027692|ENSMUSG00000022382|ENSMUSG00000040183|ENSMUSG00000004054|ENSMUSG00000003233|ENSMUSG00000026235|ENSMUSG00000027540|ENSMUSG00000026872|ENSMUSG00000024182|ENSMUSG00000045005|ENSMUSG00000052539	http://amigo.geneontology.org/cgi-bin/amigo/term_details?term=GO:0046330
blood vessel morphogenesis	Gene Ontology	GO:0048514	48	467	0.000958552	0.0144345	ENSMUSG00000057123|ENSMUSG00000022382|ENSMUSG00000028023|ENSMUSG00000025856|ENSMUSG00000027954|ENSMUSG00000003032|ENSMUSG00000028782|ENSMUSG00000045680|ENSMUSG00000022528|ENSMUSG00000031565|ENSMUSG00000032327|ENSMUSG00000031785|ENSMUSG00000030849|ENSMUSG00000029669|ENSMUSG00000029484|ENSMUSG00000037242|ENSMUSG00000020937|ENSMUSG00000036144|ENSMUSG00000015957|ENSMUSG00000002985|ENSMUSG00000034730|…	http://amigo.geneontology.org/cgi-bin/amigo/term_details?term=GO:0048514
protein autophosphorylation	Gene Ontology	GO:0046777	26	204	0.000970422	0.0145881	ENSMUSG00000025856|ENSMUSG00000016528|ENSMUSG00000005534|ENSMUSG00000031565|ENSMUSG00000031928|ENSMUSG00000030849|ENSMUSG00000001583|ENSMUSG00000004054|ENSMUSG00000020385|ENSMUSG00000042724|ENSMUSG00000014077|ENSMUSG00000005320|ENSMUSG00000020227|ENSMUSG00000031392|ENSMUSG00000068917|ENSMUSG00000027692|ENSMUSG00000059146|ENSMUSG00000022791|ENSMUSG00000028756|ENSMUSG00000025060|ENSMUSG00000035828|…	http://amigo.geneontology.org/cgi-bin/amigo/term_details?term=GO:0046777
transmembrane receptor protein tyrosine kinase signaling pathway	Gene Ontology	GO:0007169	47	455	0.000979767	0.0146879	ENSMUSG00000020170|ENSMUSG00000048583|ENSMUSG00000034165|ENSMUSG00000020027|ENSMUSG00000027540|ENSMUSG00000020053|ENSMUSG00000064330|ENSMUSG00000025856|ENSMUSG00000027954|ENSMUSG00000031443|ENSMUSG00000027288|ENSMUSG00000016528|ENSMUSG00000030110|ENSMUSG00000005534|ENSMUSG00000031565|ENSMUSG00000030849|ENSMUSG00000028639|ENSMUSG00000001583|ENSMUSG00000044461|ENSMUSG00000032336|ENSMUSG00000026778|…	http://amigo.geneontology.org/cgi-bin/amigo/term_details?term=GO:0007169
regulation of organelle organization	Gene Ontology	GO:0033043	85	953	0.000991955	0.0148075	ENSMUSG00000048583|ENSMUSG00000029524|ENSMUSG00000030216|ENSMUSG00000036923|ENSMUSG00000028832|ENSMUSG00000032812|ENSMUSG00000021338|ENSMUSG00000023923|ENSMUSG00000056367|ENSMUSG00000002052|ENSMUSG00000033444|ENSMUSG00000029192|ENSMUSG00000059146|ENSMUSG00000048904|ENSMUSG00000019929|ENSMUSG00000005534|ENSMUSG00000032083|ENSMUSG00000022528|ENSMUSG00000038685|ENSMUSG00000052374|ENSMUSG00000020848|…	http://amigo.geneontology.org/cgi-bin/amigo/term_details?term=GO:0033043
ventricular septum development	Gene Ontology	GO:0003281	12	61	0.000993495	0.0148075	ENSMUSG00000020170|ENSMUSG00000057123|ENSMUSG00000033335|ENSMUSG00000030849|ENSMUSG00000076431|ENSMUSG00000050288|ENSMUSG00000028023|ENSMUSG00000015957|ENSMUSG00000032327|ENSMUSG00000022528|ENSMUSG00000063632|ENSMUSG00000037236	http://amigo.geneontology.org/cgi-bin/amigo/term_details?term=GO:0003281
lung morphogenesis	Gene Ontology	GO:0060425	12	61	0.000993495	0.0148075	ENSMUSG00000020053|ENSMUSG00000040728|ENSMUSG00000030849|ENSMUSG00000022382|ENSMUSG00000064325|ENSMUSG00000028023|ENSMUSG00000037211|ENSMUSG00000045680|ENSMUSG00000032359|ENSMUSG00000037025|ENSMUSG00000063632|ENSMUSG00000022286	http://amigo.geneontology.org/cgi-bin/amigo/term_details?term=GO:0060425
G2 DNA damage checkpoint	Gene Ontology	GO:0031572	9	36	0.00100104	0.0148946	ENSMUSG00000031928|ENSMUSG00000061288|ENSMUSG00000019942|ENSMUSG00000052139|ENSMUSG00000028999|ENSMUSG00000016528|ENSMUSG00000037474|ENSMUSG00000028821|ENSMUSG00000033102	http://amigo.geneontology.org/cgi-bin/amigo/term_details?term=GO:0031572
Z disc	Gene Ontology	GO:0030018	15	89	0.00101748	0.0151133	ENSMUSG00000054808|ENSMUSG00000030554|ENSMUSG00000069601|ENSMUSG00000054477|ENSMUSG00000028745|ENSMUSG00000032826|ENSMUSG00000063450|ENSMUSG00000020911|ENSMUSG00000029131|ENSMUSG00000052374|ENSMUSG00000041731|ENSMUSG00000034868|ENSMUSG00000030470|ENSMUSG00000026626|ENSMUSG00000030847	http://amigo.geneontology.org/cgi-bin/amigo/term_details?term=GO:0030018
positive regulation of cell death	Gene Ontology	GO:0010942	54	545	0.00103543	0.0153539	ENSMUSG00000036390|ENSMUSG00000050395|ENSMUSG00000053279|ENSMUSG00000003031|ENSMUSG00000028341|ENSMUSG00000053965|ENSMUSG00000029207|ENSMUSG00000031548|ENSMUSG00000030562|ENSMUSG00000033685|ENSMUSG00000026283|ENSMUSG00000026288|ENSMUSG00000039959|ENSMUSG00000071337|ENSMUSG00000029821|ENSMUSG00000004054|ENSMUSG00000022982|ENSMUSG00000046949|ENSMUSG00000042724|ENSMUSG00000020653|ENSMUSG00000032171|…	http://amigo.geneontology.org/cgi-bin/amigo/term_details?term=GO:0010942
modification-dependent macromolecule catabolic process	Gene Ontology	GO:0043632	48	469	0.00104031	0.0154002	ENSMUSG00000043051|ENSMUSG00000022433|ENSMUSG00000020696|ENSMUSG00000015837|ENSMUSG00000029203|ENSMUSG00000025487|ENSMUSG00000023286|ENSMUSG00000025162|ENSMUSG00000002102|ENSMUSG00000032010|ENSMUSG00000010517|ENSMUSG00000032501|ENSMUSG00000012126|ENSMUSG00000032405|ENSMUSG00000014074|ENSMUSG00000013622|ENSMUSG00000024579|ENSMUSG00000015120|ENSMUSG00000038175|ENSMUSG00000036822|ENSMUSG00000039159|…	http://amigo.geneontology.org/cgi-bin/amigo/term_details?term=GO:0043632
positive regulation of sequence-specific DNA binding transcription factor activity	Gene Ontology	GO:0051091	25	194	0.00104555	0.0154515	ENSMUSG00000078923|ENSMUSG00000048904|ENSMUSG00000032688|ENSMUSG00000029484|ENSMUSG00000001627|ENSMUSG00000042895|ENSMUSG00000026778|ENSMUSG00000019777|ENSMUSG00000015120|ENSMUSG00000022018|ENSMUSG00000026637|ENSMUSG00000031392|ENSMUSG00000050288|ENSMUSG00000032497|ENSMUSG00000026875|ENSMUSG00000030470|ENSMUSG00000028756|ENSMUSG00000061878|ENSMUSG00000020227|ENSMUSG00000026305|ENSMUSG00000033542|…	http://amigo.geneontology.org/cgi-bin/amigo/term_details?term=GO:0051091
actin filament binding	Gene Ontology	GO:0051015	17	109	0.00104885	0.0154741	ENSMUSG00000049493|ENSMUSG00000029621|ENSMUSG00000054808|ENSMUSG00000030739|ENSMUSG00000028745|ENSMUSG00000022353|ENSMUSG00000029465|ENSMUSG00000063450|ENSMUSG00000006304|ENSMUSG00000029381|ENSMUSG00000038366|ENSMUSG00000052374|ENSMUSG00000045180|ENSMUSG00000025504|ENSMUSG00000033420|ENSMUSG00000016382|ENSMUSG00000038013	http://amigo.geneontology.org/cgi-bin/amigo/term_details?term=GO:0051015
cellular response to hormone stimulus	Gene Ontology	GO:0032870	43	407	0.00105608	0.0155147	ENSMUSG00000048583|ENSMUSG00000020027|ENSMUSG00000026826|ENSMUSG00000034165|ENSMUSG00000022383|ENSMUSG00000071072|ENSMUSG00000037992|ENSMUSG00000018566|ENSMUSG00000027288|ENSMUSG00000028341|ENSMUSG00000045680|ENSMUSG00000005534|ENSMUSG00000052374|ENSMUSG00000028639|ENSMUSG00000007880|ENSMUSG00000027540|ENSMUSG00000026778|ENSMUSG00000004698|ENSMUSG00000050824|ENSMUSG00000005583|ENSMUSG00000020893|…	http://amigo.geneontology.org/cgi-bin/amigo/term_details?term=GO:0032870
regulation of growth	Gene Ontology	GO:0040008	58	597	0.00105667	0.0155147	ENSMUSG00000048583|ENSMUSG00000020027|ENSMUSG00000070509|ENSMUSG00000031489|ENSMUSG00000059325|ENSMUSG00000033174|ENSMUSG00000003031|ENSMUSG00000029096|ENSMUSG00000034683|ENSMUSG00000005534|ENSMUSG00000015837|ENSMUSG00000031565|ENSMUSG00000029207|ENSMUSG00000055737|ENSMUSG00000049493|ENSMUSG00000026283|ENSMUSG00000030849|ENSMUSG00000001583|ENSMUSG00000001627|ENSMUSG00000019942|ENSMUSG00000043051|…	http://amigo.geneontology.org/cgi-bin/amigo/term_details?term=GO:0040008
response to molecule of bacterial origin	Gene Ontology	GO:0002237	28	228	0.00105809	0.0155147	ENSMUSG00000029417|ENSMUSG00000037992|ENSMUSG00000056501|ENSMUSG00000016528|ENSMUSG00000045005|ENSMUSG00000058301|ENSMUSG00000032688|ENSMUSG00000026234|ENSMUSG00000034610|ENSMUSG00000003184|ENSMUSG00000032501|ENSMUSG00000030595|ENSMUSG00000021025|ENSMUSG00000005583|ENSMUSG00000031392|ENSMUSG00000008318|ENSMUSG00000021699|ENSMUSG00000015243|ENSMUSG00000015305|ENSMUSG00000075701|ENSMUSG00000020227|…	http://amigo.geneontology.org/cgi-bin/amigo/term_details?term=GO:0002237
negative regulation of neurogenesis	Gene Ontology	GO:0050768	30	251	0.00105871	0.0155147	ENSMUSG00000049313|ENSMUSG00000022382|ENSMUSG00000027954|ENSMUSG00000028519|ENSMUSG00000022528|ENSMUSG00000031302|ENSMUSG00000020454|ENSMUSG00000043456|ENSMUSG00000001627|ENSMUSG00000049556|ENSMUSG00000037296|ENSMUSG00000031785|ENSMUSG00000003269|ENSMUSG00000029291|ENSMUSG00000019777|ENSMUSG00000024176|ENSMUSG00000063632|ENSMUSG00000030657|ENSMUSG00000059146|ENSMUSG00000031558|ENSMUSG00000070509|…	http://amigo.geneontology.org/cgi-bin/amigo/term_details?term=GO:0050768
regulation of system process	Gene Ontology	GO:0044057	45	432	0.0010643	0.0155705	ENSMUSG00000057123|ENSMUSG00000032171|ENSMUSG00000021125|ENSMUSG00000031488|ENSMUSG00000059325|ENSMUSG00000033174|ENSMUSG00000028341|ENSMUSG00000032083|ENSMUSG00000031302|ENSMUSG00000031565|ENSMUSG00000027584|ENSMUSG00000026576|ENSMUSG00000033910|ENSMUSG00000037010|ENSMUSG00000026414|ENSMUSG00000028635|ENSMUSG00000061723|ENSMUSG00000025220|ENSMUSG00000049044|ENSMUSG00000005320|ENSMUSG00000027523|…	http://amigo.geneontology.org/cgi-bin/amigo/term_details?term=GO:0044057
cell division	Gene Ontology	GO:0051301	50	495	0.00107263	0.0156661	ENSMUSG00000048583|ENSMUSG00000033444|ENSMUSG00000034165|ENSMUSG00000026491|ENSMUSG00000037286|ENSMUSG00000025856|ENSMUSG00000021466|ENSMUSG00000034683|ENSMUSG00000031565|ENSMUSG00000030397|ENSMUSG00000022961|ENSMUSG00000030849|ENSMUSG00000032782|ENSMUSG00000002871|ENSMUSG00000030649|ENSMUSG00000019942|ENSMUSG00000024277|ENSMUSG00000004591|ENSMUSG00000039128|ENSMUSG00000002233|ENSMUSG00000022750|…	http://amigo.geneontology.org/cgi-bin/amigo/term_details?term=GO:0051301
metanephros development	Gene Ontology	GO:0001656	14	80	0.00107514	0.0156766	ENSMUSG00000053040|ENSMUSG00000021466|ENSMUSG00000031734|ENSMUSG00000022382|ENSMUSG00000045680|ENSMUSG00000060969|ENSMUSG00000025856|ENSMUSG00000037211|ENSMUSG00000031558|ENSMUSG00000030110|ENSMUSG00000022528|ENSMUSG00000027803|ENSMUSG00000026180|ENSMUSG00000024176	http://amigo.geneontology.org/cgi-bin/amigo/term_details?term=GO:0001656
negative regulation of cellular component organization	Gene Ontology	GO:0051129	55	559	0.00108219	0.0157531	ENSMUSG00000033444|ENSMUSG00000045092|ENSMUSG00000070509|ENSMUSG00000032812|ENSMUSG00000002052|ENSMUSG00000033420|ENSMUSG00000027954|ENSMUSG00000050511|ENSMUSG00000028519|ENSMUSG00000032083|ENSMUSG00000022528|ENSMUSG00000038685|ENSMUSG00000031302|ENSMUSG00000020053|ENSMUSG00000030649|ENSMUSG00000050106|ENSMUSG00000030657|ENSMUSG00000030849|ENSMUSG00000049313|ENSMUSG00000001627|ENSMUSG00000002985|…	http://amigo.geneontology.org/cgi-bin/amigo/term_details?term=GO:0051129
microtubule polymerization	Gene Ontology	GO:0046785	11	53	0.00109193	0.0158463	ENSMUSG00000018411|ENSMUSG00000025162|ENSMUSG00000002546|ENSMUSG00000028745|ENSMUSG00000019970|ENSMUSG00000049550|ENSMUSG00000021573|ENSMUSG00000058624|ENSMUSG00000003031|ENSMUSG00000028832|ENSMUSG00000007655	http://amigo.geneontology.org/cgi-bin/amigo/term_details?term=GO:0046785
response to peptide hormone	Gene Ontology	GO:0043434	29	240	0.00109222	0.0158463	ENSMUSG00000048583|ENSMUSG00000020027|ENSMUSG00000026826|ENSMUSG00000034165|ENSMUSG00000022383|ENSMUSG00000027540|ENSMUSG00000021134|ENSMUSG00000018566|ENSMUSG00000027288|ENSMUSG00000028341|ENSMUSG00000005534|ENSMUSG00000052374|ENSMUSG00000028639|ENSMUSG00000026778|ENSMUSG00000004698|ENSMUSG00000020053|ENSMUSG00000026812|ENSMUSG00000055737|ENSMUSG00000024122|ENSMUSG00000031490|ENSMUSG00000033022|…	http://amigo.geneontology.org/cgi-bin/amigo/term_details?term=GO:0043434
single-organism biosynthetic process	Gene Ontology	GO:0044711	89	1011	0.00109841	0.0159096	ENSMUSG00000048583|ENSMUSG00000006575|ENSMUSG00000025856|ENSMUSG00000030759|ENSMUSG00000003072|ENSMUSG00000027605|ENSMUSG00000029524|ENSMUSG00000060038|ENSMUSG00000074207|ENSMUSG00000024042|ENSMUSG00000029330|ENSMUSG00000040710|ENSMUSG00000005514|ENSMUSG00000040407|ENSMUSG00000050856|ENSMUSG00000051149|ENSMUSG00000071072|ENSMUSG00000058793|ENSMUSG00000021125|ENSMUSG00000022383|ENSMUSG00000031489|…	http://amigo.geneontology.org/cgi-bin/amigo/term_details?term=GO:0044711
excitatory synapse	Gene Ontology	GO:0060076	26	206	0.0011017	0.0159309	ENSMUSG00000020009|ENSMUSG00000020300|ENSMUSG00000009394|ENSMUSG00000028519|ENSMUSG00000000881|ENSMUSG00000024873|ENSMUSG00000018411|ENSMUSG00000071658|ENSMUSG00000030849|ENSMUSG00000031302|ENSMUSG00000043051|ENSMUSG00000028176|ENSMUSG00000034730|ENSMUSG00000049044|ENSMUSG00000046709|ENSMUSG00000021466|ENSMUSG00000061751|ENSMUSG00000032826|ENSMUSG00000031253|ENSMUSG00000024122|ENSMUSG00000031626|…	http://amigo.geneontology.org/cgi-bin/amigo/term_details?term=GO:0060076
regulation of microtubule polymerization	Gene Ontology	GO:0031113	8	29	0.00110948	0.0160169	ENSMUSG00000018411|ENSMUSG00000028745|ENSMUSG00000049550|ENSMUSG00000019970|ENSMUSG00000058624|ENSMUSG00000003031|ENSMUSG00000028832|ENSMUSG00000007655	http://amigo.geneontology.org/cgi-bin/amigo/term_details?term=GO:0031113
myofibril	Gene Ontology	GO:0030016	22	162	0.00111311	0.0160428	ENSMUSG00000063450|ENSMUSG00000034868|ENSMUSG00000030554|ENSMUSG00000026414|ENSMUSG00000030847|ENSMUSG00000020911|ENSMUSG00000061723|ENSMUSG00000042895|ENSMUSG00000019467|ENSMUSG00000024049|ENSMUSG00000054808|ENSMUSG00000069601|ENSMUSG00000032826|ENSMUSG00000030470|ENSMUSG00000030249|ENSMUSG00000054477|ENSMUSG00000028745|ENSMUSG00000029131|ENSMUSG00000052374|ENSMUSG00000041731|ENSMUSG00000058587|…	http://amigo.geneontology.org/cgi-bin/amigo/term_details?term=GO:0030016
negative regulation of establishment of protein localization	Gene Ontology	GO:1904950	25	195	0.00111579	0.0160548	ENSMUSG00000031488|ENSMUSG00000032083|ENSMUSG00000033685|ENSMUSG00000026626|ENSMUSG00000010517|ENSMUSG00000031842|ENSMUSG00000014077|ENSMUSG00000030595|ENSMUSG00000035621|ENSMUSG00000021025|ENSMUSG00000022018|ENSMUSG00000029524|ENSMUSG00000076431|ENSMUSG00000021678|ENSMUSG00000028277|ENSMUSG00000027803|ENSMUSG00000035828|ENSMUSG00000029657|ENSMUSG00000038147|ENSMUSG00000024939|ENSMUSG00000031548|…	http://amigo.geneontology.org/cgi-bin/amigo/term_details?term=GO:1904950
regulation of purine nucleotide metabolic process	Gene Ontology	GO:1900542	23	173	0.00112282	0.0160712	ENSMUSG00000033910|ENSMUSG00000031489|ENSMUSG00000020431|ENSMUSG00000006575|ENSMUSG00000023964|ENSMUSG00000005534|ENSMUSG00000053965|ENSMUSG00000027584|ENSMUSG00000024039|ENSMUSG00000022383|ENSMUSG00000002985|ENSMUSG00000027523|ENSMUSG00000000394|ENSMUSG00000020053|ENSMUSG00000021699|ENSMUSG00000015243|ENSMUSG00000050288|ENSMUSG00000028756|ENSMUSG00000004040|ENSMUSG00000040407|ENSMUSG00000020108|…	http://amigo.geneontology.org/cgi-bin/amigo/term_details?term=GO:1900542
cellular response to peptide hormone stimulus	Gene Ontology	GO:0071375	24	184	0.00112325	0.0160712	ENSMUSG00000048583|ENSMUSG00000020027|ENSMUSG00000026826|ENSMUSG00000034165|ENSMUSG00000027540|ENSMUSG00000018566|ENSMUSG00000027288|ENSMUSG00000028341|ENSMUSG00000005534|ENSMUSG00000028639|ENSMUSG00000026778|ENSMUSG00000004698|ENSMUSG00000020053|ENSMUSG00000026812|ENSMUSG00000055737|ENSMUSG00000024122|ENSMUSG00000031490|ENSMUSG00000025006|ENSMUSG00000044724|ENSMUSG00000004040|ENSMUSG00000019970|…	http://amigo.geneontology.org/cgi-bin/amigo/term_details?term=GO:0071375
negative regulation of mitotic cell cycle phase transition	Gene Ontology	GO:1901991	15	90	0.00112429	0.0160712	ENSMUSG00000031928|ENSMUSG00000078429|ENSMUSG00000029022|ENSMUSG00000076431|ENSMUSG00000061288|ENSMUSG00000025764|ENSMUSG00000019942|ENSMUSG00000073802|ENSMUSG00000028999|ENSMUSG00000022510|ENSMUSG00000022750|ENSMUSG00000028821|ENSMUSG00000002871|ENSMUSG00000022018|ENSMUSG00000030649	http://amigo.geneontology.org/cgi-bin/amigo/term_details?term=GO:1901991
regulation of Rho protein signal transduction	Gene Ontology	GO:0035023	15	90	0.00112429	0.0160712	ENSMUSG00000021708|ENSMUSG00000030220|ENSMUSG00000031785|ENSMUSG00000034116|ENSMUSG00000061751|ENSMUSG00000033542|ENSMUSG00000021678|ENSMUSG00000039621|ENSMUSG00000025504|ENSMUSG00000002985|ENSMUSG00000042895|ENSMUSG00000019467|ENSMUSG00000032083|ENSMUSG00000032356|ENSMUSG00000015243	http://amigo.geneontology.org/cgi-bin/amigo/term_details?term=GO:0035023
carbohydrate metabolic process	Gene Ontology	GO:0005975	57	586	0.00113226	0.0161578	ENSMUSG00000048583|ENSMUSG00000071072|ENSMUSG00000025791|ENSMUSG00000030217|ENSMUSG00000058793|ENSMUSG00000022383|ENSMUSG00000068917|ENSMUSG00000021712|ENSMUSG00000045205|ENSMUSG00000034842|ENSMUSG00000021360|ENSMUSG00000028573|ENSMUSG00000005534|ENSMUSG00000036197|ENSMUSG00000037025|ENSMUSG00000020053|ENSMUSG00000030651|ENSMUSG00000035845|ENSMUSG00000027742|ENSMUSG00000026450|ENSMUSG00000002279|…	http://amigo.geneontology.org/cgi-bin/amigo/term_details?term=GO:0005975
regulation of cGMP metabolic process	Gene Ontology	GO:0030823	7	22	0.00113404	0.0161578	ENSMUSG00000024039|ENSMUSG00000033910|ENSMUSG00000006575|ENSMUSG00000053965|ENSMUSG00000050288|ENSMUSG00000002985|ENSMUSG00000051149	http://amigo.geneontology.org/cgi-bin/amigo/term_details?term=GO:0030823
cellular response to nitrogen compound	Gene Ontology	GO:1901699	41	384	0.00113665	0.0161686	ENSMUSG00000048583|ENSMUSG00000020027|ENSMUSG00000026826|ENSMUSG00000020300|ENSMUSG00000038332|ENSMUSG00000027540|ENSMUSG00000018566|ENSMUSG00000034165|ENSMUSG00000056501|ENSMUSG00000028341|ENSMUSG00000041974|ENSMUSG00000005534|ENSMUSG00000033335|ENSMUSG00000028639|ENSMUSG00000043613|ENSMUSG00000034610|ENSMUSG00000026778|ENSMUSG00000004698|ENSMUSG00000027523|ENSMUSG00000005583|ENSMUSG00000041530|…	http://amigo.geneontology.org/cgi-bin/amigo/term_details?term=GO:1901699
RS domain binding	Gene Ontology	GO:0050733	4	5	0.00114507	0.0162009	ENSMUSG00000022961|ENSMUSG00000021134|ENSMUSG00000061613|ENSMUSG00000024188	http://amigo.geneontology.org/cgi-bin/amigo/term_details?term=GO:0050733
negative regulation of fibroblast growth factor production	Gene Ontology	GO:0090272	4	5	0.00114507	0.0162009	ENSMUSG00000005320|ENSMUSG00000015957|ENSMUSG00000031565|ENSMUSG00000022018	http://amigo.geneontology.org/cgi-bin/amigo/term_details?term=GO:0090272
heart development	Gene Ontology	GO:0007507	49	484	0.00114526	0.0162009	ENSMUSG00000020170|ENSMUSG00000020053|ENSMUSG00000057123|ENSMUSG00000037992|ENSMUSG00000059325|ENSMUSG00000028023|ENSMUSG00000030562|ENSMUSG00000027954|ENSMUSG00000021466|ENSMUSG00000005534|ENSMUSG00000022528|ENSMUSG00000045414|ENSMUSG00000003233|ENSMUSG00000031565|ENSMUSG00000027833|ENSMUSG00000037016|ENSMUSG00000033335|ENSMUSG00000030849|ENSMUSG00000007880|ENSMUSG00000026414|ENSMUSG00000054889|…	http://amigo.geneontology.org/cgi-bin/amigo/term_details?term=GO:0007507
negative regulation of cell cycle phase transition	Gene Ontology	GO:1901988	16	100	0.00114634	0.0162009	ENSMUSG00000031928|ENSMUSG00000078429|ENSMUSG00000029022|ENSMUSG00000076431|ENSMUSG00000061288|ENSMUSG00000025764|ENSMUSG00000019942|ENSMUSG00000073802|ENSMUSG00000028999|ENSMUSG00000022510|ENSMUSG00000022750|ENSMUSG00000028821|ENSMUSG00000024922|ENSMUSG00000002871|ENSMUSG00000022018|ENSMUSG00000030649	http://amigo.geneontology.org/cgi-bin/amigo/term_details?term=GO:1901988
morphogenesis of a branching structure	Gene Ontology	GO:0001763	27	218	0.0011502	0.0162292	ENSMUSG00000020170|ENSMUSG00000022382|ENSMUSG00000030218|ENSMUSG00000028023|ENSMUSG00000025856|ENSMUSG00000045680|ENSMUSG00000037025|ENSMUSG00000037242|ENSMUSG00000027833|ENSMUSG00000040728|ENSMUSG00000030849|ENSMUSG00000045005|ENSMUSG00000032359|ENSMUSG00000031565|ENSMUSG00000024176|ENSMUSG00000022286|ENSMUSG00000020053|ENSMUSG00000021466|ENSMUSG00000030084|ENSMUSG00000064325|ENSMUSG00000037211|…	http://amigo.geneontology.org/cgi-bin/amigo/term_details?term=GO:0001763
regulation of axon extension	Gene Ontology	GO:0030516	15	91	0.00124039	0.0174453	ENSMUSG00000033174|ENSMUSG00000033335|ENSMUSG00000030084|ENSMUSG00000018411|ENSMUSG00000026640|ENSMUSG00000001627|ENSMUSG00000059146|ENSMUSG00000043051|ENSMUSG00000002985|ENSMUSG00000031558|ENSMUSG00000027394|ENSMUSG00000038708|ENSMUSG00000029291|ENSMUSG00000051149|ENSMUSG00000000627	http://amigo.geneontology.org/cgi-bin/amigo/term_details?term=GO:0030516
camera-type eye morphogenesis	Gene Ontology	GO:0048593	17	111	0.00125175	0.0175769	ENSMUSG00000020170|ENSMUSG00000044217|ENSMUSG00000028121|ENSMUSG00000029669|ENSMUSG00000007880|ENSMUSG00000045180|ENSMUSG00000045005|ENSMUSG00000021264|ENSMUSG00000053279|ENSMUSG00000028023|ENSMUSG00000015134|ENSMUSG00000029086|ENSMUSG00000032327|ENSMUSG00000038402|ENSMUSG00000024176|ENSMUSG00000063632|ENSMUSG00000022656	http://amigo.geneontology.org/cgi-bin/amigo/term_details?term=GO:0048593
contractile fiber part	Gene Ontology	GO:0044449	21	153	0.00126645	0.0177547	ENSMUSG00000024049|ENSMUSG00000030554|ENSMUSG00000069601|ENSMUSG00000054477|ENSMUSG00000028745|ENSMUSG00000032826|ENSMUSG00000026414|ENSMUSG00000063450|ENSMUSG00000020911|ENSMUSG00000041731|ENSMUSG00000029131|ENSMUSG00000052374|ENSMUSG00000061723|ENSMUSG00000042895|ENSMUSG00000034868|ENSMUSG00000030470|ENSMUSG00000058587|ENSMUSG00000054808|ENSMUSG00000026626|ENSMUSG00000030847|ENSMUSG00000030249	http://amigo.geneontology.org/cgi-bin/amigo/term_details?term=GO:0044449
small GTPase mediated signal transduction	Gene Ontology	GO:0007264	44	424	0.0012857	0.0179922	ENSMUSG00000020053|ENSMUSG00000049892|ENSMUSG00000021712|ENSMUSG00000028519|ENSMUSG00000032083|ENSMUSG00000022621|ENSMUSG00000030643|ENSMUSG00000031785|ENSMUSG00000033335|ENSMUSG00000041354|ENSMUSG00000001583|ENSMUSG00000052085|ENSMUSG00000022176|ENSMUSG00000025504|ENSMUSG00000043157|ENSMUSG00000003269|ENSMUSG00000002985|ENSMUSG00000042895|ENSMUSG00000002233|ENSMUSG00000049044|ENSMUSG00000004952|…	http://amigo.geneontology.org/cgi-bin/amigo/term_details?term=GO:0007264
nucleoside phosphate metabolic process	Gene Ontology	GO:0006753	49	487	0.00128912	0.0179922	ENSMUSG00000022383|ENSMUSG00000031489|ENSMUSG00000020431|ENSMUSG00000006575|ENSMUSG00000040181|ENSMUSG00000023964|ENSMUSG00000004789|ENSMUSG00000005534|ENSMUSG00000003072|ENSMUSG00000030651|ENSMUSG00000045211|ENSMUSG00000027584|ENSMUSG00000025630|ENSMUSG00000026576|ENSMUSG00000033910|ENSMUSG00000025041|ENSMUSG00000053965|ENSMUSG00000070385|ENSMUSG00000002985|ENSMUSG00000039450|ENSMUSG00000025220|…	http://amigo.geneontology.org/cgi-bin/amigo/term_details?term=GO:0006753
ubiquitin-like protein conjugating enzyme activity	Gene Ontology	GO:0061650	8	30	0.00133441	0.0185881	ENSMUSG00000039159|ENSMUSG00000023286|ENSMUSG00000078578|ENSMUSG00000060860|ENSMUSG00000028277|ENSMUSG00000078923|ENSMUSG00000015120|ENSMUSG00000029203	http://amigo.geneontology.org/cgi-bin/amigo/term_details?term=GO:0061650
vasculature development	Gene Ontology	GO:0001944	56	578	0.00135105	0.0187899	ENSMUSG00000020053|ENSMUSG00000057123|ENSMUSG00000022382|ENSMUSG00000028023|ENSMUSG00000025856|ENSMUSG00000027954|ENSMUSG00000003032|ENSMUSG00000028782|ENSMUSG00000045680|ENSMUSG00000022528|ENSMUSG00000031565|ENSMUSG00000032327|ENSMUSG00000031785|ENSMUSG00000033335|ENSMUSG00000030849|ENSMUSG00000029669|ENSMUSG00000029484|ENSMUSG00000037242|ENSMUSG00000020937|ENSMUSG00000026234|ENSMUSG00000036144|…	http://amigo.geneontology.org/cgi-bin/amigo/term_details?term=GO:0001944
positive regulation of cell differentiation	Gene Ontology	GO:0045597	77	856	0.00136138	0.0188803	ENSMUSG00000030170|ENSMUSG00000037025|ENSMUSG00000029417|ENSMUSG00000056770|ENSMUSG00000019359|ENSMUSG00000021466|ENSMUSG00000022382|ENSMUSG00000037992|ENSMUSG00000030110|ENSMUSG00000059325|ENSMUSG00000043051|ENSMUSG00000042211|ENSMUSG00000089989|ENSMUSG00000048904|ENSMUSG00000056501|ENSMUSG00000021360|ENSMUSG00000028519|ENSMUSG00000032083|ENSMUSG00000022528|ENSMUSG00000031302|ENSMUSG00000031565|…	http://amigo.geneontology.org/cgi-bin/amigo/term_details?term=GO:0045597
cardiac chamber development	Gene Ontology	GO:0003205	21	154	0.00136187	0.0188803	ENSMUSG00000020170|ENSMUSG00000033335|ENSMUSG00000057123|ENSMUSG00000027966|ENSMUSG00000030849|ENSMUSG00000076431|ENSMUSG00000037992|ENSMUSG00000026414|ENSMUSG00000054889|ENSMUSG00000007880|ENSMUSG00000028023|ENSMUSG00000050288|ENSMUSG00000003233|ENSMUSG00000015957|ENSMUSG00000032327|ENSMUSG00000022528|ENSMUSG00000022286|ENSMUSG00000005583|ENSMUSG00000063632|ENSMUSG00000037236|ENSMUSG00000027833	http://amigo.geneontology.org/cgi-bin/amigo/term_details?term=GO:0003205
actin-based cell projection	Gene Ontology	GO:0098858	22	165	0.00137557	0.0190163	ENSMUSG00000062252|ENSMUSG00000063450|ENSMUSG00000025856|ENSMUSG00000044217|ENSMUSG00000019210|ENSMUSG00000031207|ENSMUSG00000037242|ENSMUSG00000029203|ENSMUSG00000001642|ENSMUSG00000049551|ENSMUSG00000028176|ENSMUSG00000039450|ENSMUSG00000029291|ENSMUSG00000016382|ENSMUSG00000058835|ENSMUSG00000029086|ENSMUSG00000033420|ENSMUSG00000032216|ENSMUSG00000052374|ENSMUSG00000026235|ENSMUSG00000026609|…	http://amigo.geneontology.org/cgi-bin/amigo/term_details?term=GO:0098858
carbohydrate derivative biosynthetic process	Gene Ontology	GO:1901137	52	527	0.00137762	0.0190163	ENSMUSG00000020053|ENSMUSG00000030217|ENSMUSG00000033910|ENSMUSG00000031489|ENSMUSG00000020431|ENSMUSG00000006575|ENSMUSG00000021712|ENSMUSG00000045205|ENSMUSG00000023964|ENSMUSG00000034842|ENSMUSG00000021360|ENSMUSG00000005534|ENSMUSG00000036197|ENSMUSG00000030657|ENSMUSG00000003072|ENSMUSG00000030651|ENSMUSG00000035845|ENSMUSG00000027584|ENSMUSG00000025630|ENSMUSG00000002279|ENSMUSG00000029233|…	http://amigo.geneontology.org/cgi-bin/amigo/term_details?term=GO:1901137
positive regulation of cell migration	Gene Ontology	GO:0030335	40	376	0.00137822	0.0190163	ENSMUSG00000030170|ENSMUSG00000029417|ENSMUSG00000006304|ENSMUSG00000020053|ENSMUSG00000063450|ENSMUSG00000025856|ENSMUSG00000031443|ENSMUSG00000021360|ENSMUSG00000030110|ENSMUSG00000005534|ENSMUSG00000031565|ENSMUSG00000029484|ENSMUSG00000043613|ENSMUSG00000028635|ENSMUSG00000015957|ENSMUSG00000030562|ENSMUSG00000049044|ENSMUSG00000029291|ENSMUSG00000004698|ENSMUSG00000032359|ENSMUSG00000026064|…	http://amigo.geneontology.org/cgi-bin/amigo/term_details?term=GO:0030335
regulation of sodium ion transport	Gene Ontology	GO:0002028	13	73	0.00139125	0.019166	ENSMUSG00000009687|ENSMUSG00000027574|ENSMUSG00000033335|ENSMUSG00000032216|ENSMUSG00000026576|ENSMUSG00000027523|ENSMUSG00000024042|ENSMUSG00000004988|ENSMUSG00000019970|ENSMUSG00000014077|ENSMUSG00000078532|ENSMUSG00000069601|ENSMUSG00000020893	http://amigo.geneontology.org/cgi-bin/amigo/term_details?term=GO:0002028
positive regulation of cellular component movement	Gene Ontology	GO:0051272	42	401	0.00139415	0.0191756	ENSMUSG00000030170|ENSMUSG00000029417|ENSMUSG00000006304|ENSMUSG00000020053|ENSMUSG00000063450|ENSMUSG00000025856|ENSMUSG00000031443|ENSMUSG00000021360|ENSMUSG00000030110|ENSMUSG00000005534|ENSMUSG00000031565|ENSMUSG00000026180|ENSMUSG00000029484|ENSMUSG00000043613|ENSMUSG00000028635|ENSMUSG00000015957|ENSMUSG00000030562|ENSMUSG00000049044|ENSMUSG00000029291|ENSMUSG00000004698|ENSMUSG00000032359|…	http://amigo.geneontology.org/cgi-bin/amigo/term_details?term=GO:0051272
relaxation of muscle	Gene Ontology	GO:0090075	7	23	0.00140553	0.0193018	ENSMUSG00000021699|ENSMUSG00000026576|ENSMUSG00000033910|ENSMUSG00000030730|ENSMUSG00000053965|ENSMUSG00000022982|ENSMUSG00000063142	http://amigo.geneontology.org/cgi-bin/amigo/term_details?term=GO:0090075
single-organism nuclear import	Gene Ontology	GO:1902593	28	233	0.00141835	0.0193864	ENSMUSG00000009291|ENSMUSG00000059327|ENSMUSG00000050511|ENSMUSG00000031586|ENSMUSG00000022528|ENSMUSG00000045969|ENSMUSG00000019942|ENSMUSG00000045733|ENSMUSG00000042895|ENSMUSG00000010517|ENSMUSG00000066232|ENSMUSG00000026778|ENSMUSG00000014077|ENSMUSG00000030595|ENSMUSG00000021025|ENSMUSG00000020053|ENSMUSG00000009640|ENSMUSG00000068742|ENSMUSG00000027803|ENSMUSG00000061878|ENSMUSG00000001855|…	http://amigo.geneontology.org/cgi-bin/amigo/term_details?term=GO:1902593
protein import into nucleus	Gene Ontology	GO:0006606	28	233	0.00141835	0.0193864	ENSMUSG00000009291|ENSMUSG00000059327|ENSMUSG00000050511|ENSMUSG00000031586|ENSMUSG00000022528|ENSMUSG00000045969|ENSMUSG00000019942|ENSMUSG00000045733|ENSMUSG00000042895|ENSMUSG00000010517|ENSMUSG00000066232|ENSMUSG00000026778|ENSMUSG00000014077|ENSMUSG00000030595|ENSMUSG00000021025|ENSMUSG00000020053|ENSMUSG00000009640|ENSMUSG00000068742|ENSMUSG00000027803|ENSMUSG00000061878|ENSMUSG00000001855|…	http://amigo.geneontology.org/cgi-bin/amigo/term_details?term=GO:0006606
protein targeting to nucleus	Gene Ontology	GO:0044744	28	233	0.00141835	0.0193864	ENSMUSG00000009291|ENSMUSG00000059327|ENSMUSG00000050511|ENSMUSG00000031586|ENSMUSG00000022528|ENSMUSG00000045969|ENSMUSG00000019942|ENSMUSG00000045733|ENSMUSG00000042895|ENSMUSG00000010517|ENSMUSG00000066232|ENSMUSG00000026778|ENSMUSG00000014077|ENSMUSG00000030595|ENSMUSG00000021025|ENSMUSG00000020053|ENSMUSG00000009640|ENSMUSG00000068742|ENSMUSG00000027803|ENSMUSG00000061878|ENSMUSG00000001855|…	http://amigo.geneontology.org/cgi-bin/amigo/term_details?term=GO:0044744
regulation of cell cycle phase transition	Gene Ontology	GO:1901987	25	199	0.00143907	0.0196388	ENSMUSG00000036923|ENSMUSG00000030094|ENSMUSG00000048904|ENSMUSG00000034683|ENSMUSG00000002871|ENSMUSG00000031928|ENSMUSG00000078429|ENSMUSG00000024922|ENSMUSG00000029022|ENSMUSG00000030649|ENSMUSG00000019942|ENSMUSG00000028999|ENSMUSG00000026778|ENSMUSG00000022750|ENSMUSG00000028821|ENSMUSG00000022018|ENSMUSG00000076431|ENSMUSG00000022510|ENSMUSG00000031095|ENSMUSG00000061288|ENSMUSG00000025764|…	http://amigo.geneontology.org/cgi-bin/amigo/term_details?term=GO:1901987
peptidyl-serine modification	Gene Ontology	GO:0018209	29	245	0.00145149	0.0197774	ENSMUSG00000036923|ENSMUSG00000019970|ENSMUSG00000050511|ENSMUSG00000016528|ENSMUSG00000030110|ENSMUSG00000070904|ENSMUSG00000024182|ENSMUSG00000025162|ENSMUSG00000036707|ENSMUSG00000019942|ENSMUSG00000004591|ENSMUSG00000061175|ENSMUSG00000026778|ENSMUSG00000040435|ENSMUSG00000020115|ENSMUSG00000049001|ENSMUSG00000000394|ENSMUSG00000021699|ENSMUSG00000019929|ENSMUSG00000058297|ENSMUSG00000059146|…	http://amigo.geneontology.org/cgi-bin/amigo/term_details?term=GO:0018209
positive regulation of locomotion	Gene Ontology	GO:0040017	42	402	0.00145534	0.0197989	ENSMUSG00000030170|ENSMUSG00000029417|ENSMUSG00000006304|ENSMUSG00000020053|ENSMUSG00000063450|ENSMUSG00000025856|ENSMUSG00000031443|ENSMUSG00000021360|ENSMUSG00000030110|ENSMUSG00000029291|ENSMUSG00000031565|ENSMUSG00000005534|ENSMUSG00000001741|ENSMUSG00000029484|ENSMUSG00000043613|ENSMUSG00000028635|ENSMUSG00000015957|ENSMUSG00000030562|ENSMUSG00000049044|ENSMUSG00000004698|ENSMUSG00000004814|…	http://amigo.geneontology.org/cgi-bin/amigo/term_details?term=GO:0040017
lung development	Gene Ontology	GO:0030324	24	188	0.00146005	0.0198322	ENSMUSG00000071072|ENSMUSG00000022382|ENSMUSG00000059325|ENSMUSG00000028023|ENSMUSG00000025856|ENSMUSG00000045680|ENSMUSG00000022528|ENSMUSG00000037025|ENSMUSG00000031565|ENSMUSG00000040728|ENSMUSG00000030849|ENSMUSG00000028635|ENSMUSG00000005320|ENSMUSG00000032359|ENSMUSG00000063632|ENSMUSG00000020053|ENSMUSG00000016194|ENSMUSG00000030218|ENSMUSG00000064325|ENSMUSG00000037211|ENSMUSG00000024940|…	http://amigo.geneontology.org/cgi-bin/amigo/term_details?term=GO:0030324
cell junction organization	Gene Ontology	GO:0034330	23	177	0.00147232	0.0199368	ENSMUSG00000057123|ENSMUSG00000054808|ENSMUSG00000022565|ENSMUSG00000045005|ENSMUSG00000064272|ENSMUSG00000054889|ENSMUSG00000004591|ENSMUSG00000025006|ENSMUSG00000025223|ENSMUSG00000002233|ENSMUSG00000020656|ENSMUSG00000022286|ENSMUSG00000031788|ENSMUSG00000026812|ENSMUSG00000070473|ENSMUSG00000024122|ENSMUSG00000025060|ENSMUSG00000022353|ENSMUSG00000045180|ENSMUSG00000052374|ENSMUSG00000015957|…	http://amigo.geneontology.org/cgi-bin/amigo/term_details?term=GO:0034330
angiogenesis	Gene Ontology	GO:0001525	41	390	0.00148166	0.0200323	ENSMUSG00000022382|ENSMUSG00000028023|ENSMUSG00000025856|ENSMUSG00000027954|ENSMUSG00000003032|ENSMUSG00000037242|ENSMUSG00000028782|ENSMUSG00000045680|ENSMUSG00000031565|ENSMUSG00000030849|ENSMUSG00000029669|ENSMUSG00000029484|ENSMUSG00000045005|ENSMUSG00000020937|ENSMUSG00000036144|ENSMUSG00000031785|ENSMUSG00000034730|ENSMUSG00000019929|ENSMUSG00000004698|ENSMUSG00000000753|ENSMUSG00000032359|…	http://amigo.geneontology.org/cgi-bin/amigo/term_details?term=GO:0001525
nuclear import	Gene Ontology	GO:0051170	28	234	0.00150191	0.0202746	ENSMUSG00000009291|ENSMUSG00000059327|ENSMUSG00000050511|ENSMUSG00000031586|ENSMUSG00000022528|ENSMUSG00000045969|ENSMUSG00000019942|ENSMUSG00000045733|ENSMUSG00000042895|ENSMUSG00000010517|ENSMUSG00000066232|ENSMUSG00000026778|ENSMUSG00000014077|ENSMUSG00000030595|ENSMUSG00000021025|ENSMUSG00000020053|ENSMUSG00000009640|ENSMUSG00000068742|ENSMUSG00000027803|ENSMUSG00000061878|ENSMUSG00000001855|…	http://amigo.geneontology.org/cgi-bin/amigo/term_details?term=GO:0051170
regulation of extent of cell growth	Gene Ontology	GO:0061387	16	103	0.00150728	0.0203157	ENSMUSG00000033174|ENSMUSG00000033335|ENSMUSG00000030084|ENSMUSG00000018411|ENSMUSG00000026640|ENSMUSG00000001627|ENSMUSG00000059146|ENSMUSG00000043051|ENSMUSG00000002985|ENSMUSG00000031558|ENSMUSG00000027394|ENSMUSG00000038708|ENSMUSG00000029291|ENSMUSG00000070509|ENSMUSG00000051149|ENSMUSG00000000627	http://amigo.geneontology.org/cgi-bin/amigo/term_details?term=GO:0061387
negative regulation of cell development	Gene Ontology	GO:0010721	34	305	0.00151601	0.0204018	ENSMUSG00000049313|ENSMUSG00000022382|ENSMUSG00000027954|ENSMUSG00000028519|ENSMUSG00000022528|ENSMUSG00000031302|ENSMUSG00000020454|ENSMUSG00000043456|ENSMUSG00000001627|ENSMUSG00000049556|ENSMUSG00000037296|ENSMUSG00000031785|ENSMUSG00000003269|ENSMUSG00000029291|ENSMUSG00000019777|ENSMUSG00000024176|ENSMUSG00000063632|ENSMUSG00000020053|ENSMUSG00000054808|ENSMUSG00000037962|ENSMUSG00000030657|…	http://amigo.geneontology.org/cgi-bin/amigo/term_details?term=GO:0010721
ubiquitin-like protein ligase activity	Gene Ontology	GO:0061659	24	189	0.00155667	0.0208527	ENSMUSG00000090213|ENSMUSG00000055401|ENSMUSG00000020696|ENSMUSG00000029203|ENSMUSG00000023286|ENSMUSG00000032405|ENSMUSG00000040782|ENSMUSG00000038175|ENSMUSG00000036822|ENSMUSG00000039159|ENSMUSG00000026484|ENSMUSG00000033417|ENSMUSG00000023977|ENSMUSG00000027598|ENSMUSG00000025326|ENSMUSG00000031095|ENSMUSG00000028277|ENSMUSG00000022184|ENSMUSG00000032216|ENSMUSG00000078923|ENSMUSG00000030779|…	http://amigo.geneontology.org/cgi-bin/amigo/term_details?term=GO:0061659
cellular response to peptide	Gene Ontology	GO:1901653	24	189	0.00155667	0.0208527	ENSMUSG00000048583|ENSMUSG00000020027|ENSMUSG00000026826|ENSMUSG00000034165|ENSMUSG00000027540|ENSMUSG00000018566|ENSMUSG00000027288|ENSMUSG00000028341|ENSMUSG00000005534|ENSMUSG00000028639|ENSMUSG00000026778|ENSMUSG00000004698|ENSMUSG00000020053|ENSMUSG00000026812|ENSMUSG00000055737|ENSMUSG00000024122|ENSMUSG00000031490|ENSMUSG00000025006|ENSMUSG00000044724|ENSMUSG00000004040|ENSMUSG00000019970|…	http://amigo.geneontology.org/cgi-bin/amigo/term_details?term=GO:1901653
negative regulation of neuron death	Gene Ontology	GO:1901215	24	189	0.00155667	0.0208527	ENSMUSG00000026826|ENSMUSG00000020300|ENSMUSG00000022383|ENSMUSG00000056501|ENSMUSG00000028341|ENSMUSG00000049313|ENSMUSG00000028933|ENSMUSG00000022307|ENSMUSG00000002985|ENSMUSG00000000753|ENSMUSG00000005583|ENSMUSG00000049001|ENSMUSG00000032171|ENSMUSG00000020053|ENSMUSG00000055737|ENSMUSG00000024122|ENSMUSG00000028756|ENSMUSG00000022982|ENSMUSG00000029657|ENSMUSG00000004040|ENSMUSG00000022270|…	http://amigo.geneontology.org/cgi-bin/amigo/term_details?term=GO:1901215
kinase regulator activity	Gene Ontology	GO:0019207	23	178	0.00157301	0.0210186	ENSMUSG00000048583|ENSMUSG00000020027|ENSMUSG00000037992|ENSMUSG00000003032|ENSMUSG00000028212|ENSMUSG00000028573|ENSMUSG00000032688|ENSMUSG00000036707|ENSMUSG00000027829|ENSMUSG00000032501|ENSMUSG00000014077|ENSMUSG00000019929|ENSMUSG00000022018|ENSMUSG00000020053|ENSMUSG00000058835|ENSMUSG00000045671|ENSMUSG00000037251|ENSMUSG00000028551|ENSMUSG00000024858|ENSMUSG00000015957|ENSMUSG00000073802|…	http://amigo.geneontology.org/cgi-bin/amigo/term_details?term=GO:0019207
response to biotic stimulus	Gene Ontology	GO:0009607	63	674	0.00157387	0.0210186	ENSMUSG00000030144|ENSMUSG00000029417|ENSMUSG00000033910|ENSMUSG00000020009|ENSMUSG00000037992|ENSMUSG00000026234|ENSMUSG00000075701|ENSMUSG00000051451|ENSMUSG00000056501|ENSMUSG00000016528|ENSMUSG00000070904|ENSMUSG00000032501|ENSMUSG00000045005|ENSMUSG00000058301|ENSMUSG00000030142|ENSMUSG00000056978|ENSMUSG00000023349|ENSMUSG00000026576|ENSMUSG00000042265|ENSMUSG00000029484|ENSMUSG00000000244|…	http://amigo.geneontology.org/cgi-bin/amigo/term_details?term=GO:0009607
response to decreased oxygen levels	Gene Ontology	GO:0036293	22	167	0.00157857	0.0210227	ENSMUSG00000026826|ENSMUSG00000020300|ENSMUSG00000022383|ENSMUSG00000050511|ENSMUSG00000018566|ENSMUSG00000036923|ENSMUSG00000033685|ENSMUSG00000026576|ENSMUSG00000024039|ENSMUSG00000049001|ENSMUSG00000022018|ENSMUSG00000063142|ENSMUSG00000004328|ENSMUSG00000026812|ENSMUSG00000076431|ENSMUSG00000031490|ENSMUSG00000018893|ENSMUSG00000028756|ENSMUSG00000029135|ENSMUSG00000020108|ENSMUSG00000007655|…	http://amigo.geneontology.org/cgi-bin/amigo/term_details?term=GO:0036293
endoplasmic reticulum	Gene Ontology	GO:0005783	113	1358	0.00157899	0.0210227	ENSMUSG00000029510|ENSMUSG00000020300|ENSMUSG00000027540|ENSMUSG00000020261|ENSMUSG00000049892|ENSMUSG00000030219|ENSMUSG00000059327|ENSMUSG00000022561|ENSMUSG00000024873|ENSMUSG00000090213|ENSMUSG00000023286|ENSMUSG00000003484|ENSMUSG00000024270|ENSMUSG00000032523|ENSMUSG00000066235|ENSMUSG00000070509|ENSMUSG00000063142|ENSMUSG00000030161|ENSMUSG00000029727|ENSMUSG00000035325|ENSMUSG00000029330|…	http://amigo.geneontology.org/cgi-bin/amigo/term_details?term=GO:0005783
negative regulation of cytokine-mediated signaling pathway	Gene Ontology	GO:0001960	8	31	0.00159411	0.0211918	ENSMUSG00000007655|ENSMUSG00000021678|ENSMUSG00000020696|ENSMUSG00000031558|ENSMUSG00000032083|ENSMUSG00000020227|ENSMUSG00000026073|ENSMUSG00000014776	http://amigo.geneontology.org/cgi-bin/amigo/term_details?term=GO:0001960
actin filament	Gene Ontology	GO:0005884	14	84	0.00162139	0.0215216	ENSMUSG00000033444|ENSMUSG00000049493|ENSMUSG00000044534|ENSMUSG00000026812|ENSMUSG00000019359|ENSMUSG00000028745|ENSMUSG00000021338|ENSMUSG00000026288|ENSMUSG00000045180|ENSMUSG00000020173|ENSMUSG00000058587|ENSMUSG00000071072|ENSMUSG00000016382|ENSMUSG00000038013	http://amigo.geneontology.org/cgi-bin/amigo/term_details?term=GO:0005884
I-kappaB kinase/NF-kappaB signaling	Gene Ontology	GO:0007249	25	201	0.0016289	0.0215885	ENSMUSG00000059327|ENSMUSG00000078923|ENSMUSG00000026070|ENSMUSG00000015837|ENSMUSG00000023349|ENSMUSG00000032688|ENSMUSG00000003184|ENSMUSG00000010517|ENSMUSG00000026778|ENSMUSG00000030595|ENSMUSG00000021025|ENSMUSG00000002233|ENSMUSG00000015120|ENSMUSG00000020893|ENSMUSG00000026637|ENSMUSG00000031392|ENSMUSG00000021678|ENSMUSG00000024122|ENSMUSG00000030471|ENSMUSG00000028756|ENSMUSG00000061878|…	http://amigo.geneontology.org/cgi-bin/amigo/term_details?term=GO:0007249
positive regulation of apoptotic process	Gene Ontology	GO:0043065	50	506	0.0016383	0.0216802	ENSMUSG00000036390|ENSMUSG00000050395|ENSMUSG00000053279|ENSMUSG00000003031|ENSMUSG00000028341|ENSMUSG00000053965|ENSMUSG00000029207|ENSMUSG00000031548|ENSMUSG00000030562|ENSMUSG00000026283|ENSMUSG00000026288|ENSMUSG00000039959|ENSMUSG00000071337|ENSMUSG00000029821|ENSMUSG00000004054|ENSMUSG00000022982|ENSMUSG00000046949|ENSMUSG00000042724|ENSMUSG00000020653|ENSMUSG00000032171|ENSMUSG00000032359|…	http://amigo.geneontology.org/cgi-bin/amigo/term_details?term=GO:0043065
negative regulation of molecular function	Gene Ontology	GO:0044092	73	809	0.00166227	0.0219641	ENSMUSG00000020027|ENSMUSG00000036390|ENSMUSG00000021125|ENSMUSG00000022383|ENSMUSG00000027540|ENSMUSG00000004535|ENSMUSG00000031548|ENSMUSG00000003032|ENSMUSG00000032083|ENSMUSG00000033688|ENSMUSG00000020696|ENSMUSG00000029131|ENSMUSG00000057719|ENSMUSG00000034683|ENSMUSG00000022528|ENSMUSG00000000881|ENSMUSG00000020053|ENSMUSG00000027584|ENSMUSG00000050106|ENSMUSG00000019278|ENSMUSG00000049313|…	http://amigo.geneontology.org/cgi-bin/amigo/term_details?term=GO:0044092
single organism cell adhesion	Gene Ontology	GO:0098602	63	676	0.00167904	0.0221251	ENSMUSG00000048583|ENSMUSG00000020053|ENSMUSG00000034165|ENSMUSG00000021360|ENSMUSG00000022383|ENSMUSG00000022382|ENSMUSG00000037992|ENSMUSG00000028519|ENSMUSG00000034023|ENSMUSG00000033420|ENSMUSG00000027954|ENSMUSG00000033152|ENSMUSG00000070904|ENSMUSG00000006411|ENSMUSG00000034868|ENSMUSG00000056501|ENSMUSG00000028341|ENSMUSG00000030110|ENSMUSG00000032083|ENSMUSG00000022528|ENSMUSG00000031302|…	http://amigo.geneontology.org/cgi-bin/amigo/term_details?term=GO:0098602
regulation of ossification	Gene Ontology	GO:0030278	23	179	0.00167952	0.0221251	ENSMUSG00000020053|ENSMUSG00000019359|ENSMUSG00000022382|ENSMUSG00000030218|ENSMUSG00000023964|ENSMUSG00000056501|ENSMUSG00000031565|ENSMUSG00000031681|ENSMUSG00000048546|ENSMUSG00000013622|ENSMUSG00000027523|ENSMUSG00000005583|ENSMUSG00000063632|ENSMUSG00000045092|ENSMUSG00000021466|ENSMUSG00000037962|ENSMUSG00000039153|ENSMUSG00000024940|ENSMUSG00000022510|ENSMUSG00000037573|ENSMUSG00000031548|…	http://amigo.geneontology.org/cgi-bin/amigo/term_details?term=GO:0030278
cell-cell junction organization	Gene Ontology	GO:0045216	22	168	0.0016893	0.0222205	ENSMUSG00000057123|ENSMUSG00000054808|ENSMUSG00000045005|ENSMUSG00000064272|ENSMUSG00000054889|ENSMUSG00000004591|ENSMUSG00000025006|ENSMUSG00000025223|ENSMUSG00000002233|ENSMUSG00000020656|ENSMUSG00000022286|ENSMUSG00000031788|ENSMUSG00000026812|ENSMUSG00000070473|ENSMUSG00000024122|ENSMUSG00000025060|ENSMUSG00000022353|ENSMUSG00000045180|ENSMUSG00000052374|ENSMUSG00000015957|ENSMUSG00000007655|…	http://amigo.geneontology.org/cgi-bin/amigo/term_details?term=GO:0045216
negative regulation of sequence-specific DNA binding transcription factor activity	Gene Ontology	GO:0043433	18	125	0.00170023	0.0223306	ENSMUSG00000031392|ENSMUSG00000026484|ENSMUSG00000027598|ENSMUSG00000014303|ENSMUSG00000024042|ENSMUSG00000034610|ENSMUSG00000032501|ENSMUSG00000003032|ENSMUSG00000062563|ENSMUSG00000021466|ENSMUSG00000066613|ENSMUSG00000019768|ENSMUSG00000004535|ENSMUSG00000021025|ENSMUSG00000019777|ENSMUSG00000020227|ENSMUSG00000037025|ENSMUSG00000014077	http://amigo.geneontology.org/cgi-bin/amigo/term_details?term=GO:0043433
negative regulation of muscle contraction	Gene Ontology	GO:0045932	7	24	0.00172518	0.0226242	ENSMUSG00000021125|ENSMUSG00000033910|ENSMUSG00000024858|ENSMUSG00000015950|ENSMUSG00000053965|ENSMUSG00000022982|ENSMUSG00000063142	http://amigo.geneontology.org/cgi-bin/amigo/term_details?term=GO:0045932
dendrite	Gene Ontology	GO:0030425	49	495	0.00175329	0.0229583	ENSMUSG00000020009|ENSMUSG00000020300|ENSMUSG00000000881|ENSMUSG00000021466|ENSMUSG00000037992|ENSMUSG00000030495|ENSMUSG00000026304|ENSMUSG00000030161|ENSMUSG00000030110|ENSMUSG00000071658|ENSMUSG00000031302|ENSMUSG00000024873|ENSMUSG00000002985|ENSMUSG00000022553|ENSMUSG00000028639|ENSMUSG00000029484|ENSMUSG00000043613|ENSMUSG00000028176|ENSMUSG00000037296|ENSMUSG00000023328|ENSMUSG00000032336|…	http://amigo.geneontology.org/cgi-bin/amigo/term_details?term=GO:0030425
single-organism carbohydrate metabolic process	Gene Ontology	GO:0044723	50	508	0.00176542	0.0229831	ENSMUSG00000048583|ENSMUSG00000071072|ENSMUSG00000025791|ENSMUSG00000030217|ENSMUSG00000058793|ENSMUSG00000022383|ENSMUSG00000068917|ENSMUSG00000021712|ENSMUSG00000045205|ENSMUSG00000034842|ENSMUSG00000021360|ENSMUSG00000005534|ENSMUSG00000036197|ENSMUSG00000037025|ENSMUSG00000020053|ENSMUSG00000030651|ENSMUSG00000035845|ENSMUSG00000027742|ENSMUSG00000002279|ENSMUSG00000004383|ENSMUSG00000001642|…	http://amigo.geneontology.org/cgi-bin/amigo/term_details?term=GO:0044723
carbohydrate homeostasis	Gene Ontology	GO:0033500	24	191	0.00176644	0.0229831	ENSMUSG00000018566|ENSMUSG00000005534|ENSMUSG00000037025|ENSMUSG00000030562|ENSMUSG00000033685|ENSMUSG00000078650|ENSMUSG00000050824|ENSMUSG00000000394|ENSMUSG00000020053|ENSMUSG00000060038|ENSMUSG00000021466|ENSMUSG00000076431|ENSMUSG00000032754|ENSMUSG00000005320|ENSMUSG00000031075|ENSMUSG00000068742|ENSMUSG00000025142|ENSMUSG00000035828|ENSMUSG00000004040|ENSMUSG00000054459|ENSMUSG00000010505|…	http://amigo.geneontology.org/cgi-bin/amigo/term_details?term=GO:0033500
respiratory tube development	Gene Ontology	GO:0030323	24	191	0.00176644	0.0229831	ENSMUSG00000071072|ENSMUSG00000022382|ENSMUSG00000059325|ENSMUSG00000028023|ENSMUSG00000025856|ENSMUSG00000045680|ENSMUSG00000022528|ENSMUSG00000037025|ENSMUSG00000031565|ENSMUSG00000040728|ENSMUSG00000030849|ENSMUSG00000028635|ENSMUSG00000005320|ENSMUSG00000032359|ENSMUSG00000063632|ENSMUSG00000020053|ENSMUSG00000016194|ENSMUSG00000030218|ENSMUSG00000064325|ENSMUSG00000037211|ENSMUSG00000024940|…	http://amigo.geneontology.org/cgi-bin/amigo/term_details?term=GO:0030323
glucose homeostasis	Gene Ontology	GO:0042593	24	191	0.00176644	0.0229831	ENSMUSG00000018566|ENSMUSG00000005534|ENSMUSG00000037025|ENSMUSG00000030562|ENSMUSG00000033685|ENSMUSG00000078650|ENSMUSG00000050824|ENSMUSG00000000394|ENSMUSG00000020053|ENSMUSG00000060038|ENSMUSG00000021466|ENSMUSG00000076431|ENSMUSG00000032754|ENSMUSG00000005320|ENSMUSG00000031075|ENSMUSG00000068742|ENSMUSG00000025142|ENSMUSG00000035828|ENSMUSG00000004040|ENSMUSG00000054459|ENSMUSG00000010505|…	http://amigo.geneontology.org/cgi-bin/amigo/term_details?term=GO:0042593
prostate gland development	Gene Ontology	GO:0030850	10	48	0.00177097	0.0229831	ENSMUSG00000020170|ENSMUSG00000020053|ENSMUSG00000004207|ENSMUSG00000030849|ENSMUSG00000031548|ENSMUSG00000003031|ENSMUSG00000022510|ENSMUSG00000019768|ENSMUSG00000025326|ENSMUSG00000000753	http://amigo.geneontology.org/cgi-bin/amigo/term_details?term=GO:0030850
endochondral bone morphogenesis	Gene Ontology	GO:0060350	10	48	0.00177097	0.0229831	ENSMUSG00000039153|ENSMUSG00000037992|ENSMUSG00000020003|ENSMUSG00000001419|ENSMUSG00000024039|ENSMUSG00000005514|ENSMUSG00000045672|ENSMUSG00000027523|ENSMUSG00000005583|ENSMUSG00000027833	http://amigo.geneontology.org/cgi-bin/amigo/term_details?term=GO:0060350
plasma membrane region	Gene Ontology	GO:0098590	72	798	0.00178613	0.0231162	ENSMUSG00000062252|ENSMUSG00000030161|ENSMUSG00000021466|ENSMUSG00000006304|ENSMUSG00000021135|ENSMUSG00000063450|ENSMUSG00000003123|ENSMUSG00000027947|ENSMUSG00000033420|ENSMUSG00000029381|ENSMUSG00000028552|ENSMUSG00000028238|ENSMUSG00000019210|ENSMUSG00000031207|ENSMUSG00000022565|ENSMUSG00000005534|ENSMUSG00000000881|ENSMUSG00000030562|ENSMUSG00000024873|ENSMUSG00000028645|ENSMUSG00000027457|…	http://amigo.geneontology.org/cgi-bin/amigo/term_details?term=GO:0098590
negative regulation of transport	Gene Ontology	GO:0051051	44	432	0.00178883	0.0231162	ENSMUSG00000029524|ENSMUSG00000031488|ENSMUSG00000014776|ENSMUSG00000007655|ENSMUSG00000005534|ENSMUSG00000032083|ENSMUSG00000022528|ENSMUSG00000024873|ENSMUSG00000033685|ENSMUSG00000027584|ENSMUSG00000018411|ENSMUSG00000003484|ENSMUSG00000056978|ENSMUSG00000028635|ENSMUSG00000010517|ENSMUSG00000031842|ENSMUSG00000014077|ENSMUSG00000030595|ENSMUSG00000035621|ENSMUSG00000021025|ENSMUSG00000027523|…	http://amigo.geneontology.org/cgi-bin/amigo/term_details?term=GO:0051051
triglyceride metabolic process	Gene Ontology	GO:0006641	14	85	0.00178916	0.0231162	ENSMUSG00000002279|ENSMUSG00000007655|ENSMUSG00000031545|ENSMUSG00000024042|ENSMUSG00000024052|ENSMUSG00000002985|ENSMUSG00000032083|ENSMUSG00000032193|ENSMUSG00000057074|ENSMUSG00000019768|ENSMUSG00000003123|ENSMUSG00000078650|ENSMUSG00000015568|ENSMUSG00000025509	http://amigo.geneontology.org/cgi-bin/amigo/term_details?term=GO:0006641
developmental growth involved in morphogenesis	Gene Ontology	GO:0060560	26	214	0.0017923	0.023121	ENSMUSG00000020173|ENSMUSG00000022382|ENSMUSG00000033174|ENSMUSG00000031302|ENSMUSG00000018411|ENSMUSG00000033335|ENSMUSG00000030849|ENSMUSG00000001627|ENSMUSG00000043051|ENSMUSG00000002985|ENSMUSG00000038708|ENSMUSG00000029291|ENSMUSG00000070509|ENSMUSG00000045092|ENSMUSG00000030084|ENSMUSG00000026640|ENSMUSG00000059146|ENSMUSG00000037211|ENSMUSG00000031558|ENSMUSG00000027394|ENSMUSG00000031548|…	http://amigo.geneontology.org/cgi-bin/amigo/term_details?term=GO:0060560
positive regulation of nucleotide metabolic process	Gene Ontology	GO:0045981	16	105	0.00179747	0.023121	ENSMUSG00000020053|ENSMUSG00000015243|ENSMUSG00000033910|ENSMUSG00000031489|ENSMUSG00000020431|ENSMUSG00000006575|ENSMUSG00000004040|ENSMUSG00000050288|ENSMUSG00000002985|ENSMUSG00000023964|ENSMUSG00000049649|ENSMUSG00000027523|ENSMUSG00000005534|ENSMUSG00000028756|ENSMUSG00000051149|ENSMUSG00000000394	http://amigo.geneontology.org/cgi-bin/amigo/term_details?term=GO:0045981
positive regulation of purine nucleotide metabolic process	Gene Ontology	GO:1900544	16	105	0.00179747	0.023121	ENSMUSG00000020053|ENSMUSG00000015243|ENSMUSG00000033910|ENSMUSG00000031489|ENSMUSG00000020431|ENSMUSG00000006575|ENSMUSG00000004040|ENSMUSG00000050288|ENSMUSG00000002985|ENSMUSG00000023964|ENSMUSG00000049649|ENSMUSG00000027523|ENSMUSG00000005534|ENSMUSG00000028756|ENSMUSG00000051149|ENSMUSG00000000394	http://amigo.geneontology.org/cgi-bin/amigo/term_details?term=GO:1900544
p53 binding	Gene Ontology	GO:0002039	11	57	0.00181985	0.0233744	ENSMUSG00000071072|ENSMUSG00000037492|ENSMUSG00000028639|ENSMUSG00000020032|ENSMUSG00000059146|ENSMUSG00000009291|ENSMUSG00000024182|ENSMUSG00000020696|ENSMUSG00000022510|ENSMUSG00000043909|ENSMUSG00000021285	http://amigo.geneontology.org/cgi-bin/amigo/term_details?term=GO:0002039
response to other organism	Gene Ontology	GO:0051707	60	640	0.00188601	0.0241531	ENSMUSG00000030144|ENSMUSG00000029417|ENSMUSG00000033910|ENSMUSG00000020009|ENSMUSG00000037992|ENSMUSG00000026234|ENSMUSG00000075701|ENSMUSG00000051451|ENSMUSG00000056501|ENSMUSG00000016528|ENSMUSG00000070904|ENSMUSG00000032501|ENSMUSG00000045005|ENSMUSG00000020823|ENSMUSG00000030142|ENSMUSG00000056978|ENSMUSG00000023349|ENSMUSG00000026576|ENSMUSG00000042265|ENSMUSG00000029484|ENSMUSG00000000244|…	http://amigo.geneontology.org/cgi-bin/amigo/term_details?term=GO:0051707
response to external biotic stimulus	Gene Ontology	GO:0043207	60	640	0.00188601	0.0241531	ENSMUSG00000030144|ENSMUSG00000029417|ENSMUSG00000033910|ENSMUSG00000020009|ENSMUSG00000037992|ENSMUSG00000026234|ENSMUSG00000075701|ENSMUSG00000051451|ENSMUSG00000056501|ENSMUSG00000016528|ENSMUSG00000070904|ENSMUSG00000032501|ENSMUSG00000045005|ENSMUSG00000020823|ENSMUSG00000030142|ENSMUSG00000056978|ENSMUSG00000023349|ENSMUSG00000026576|ENSMUSG00000042265|ENSMUSG00000029484|ENSMUSG00000000244|…	http://amigo.geneontology.org/cgi-bin/amigo/term_details?term=GO:0043207
cellular homeostasis	Gene Ontology	GO:0019725	64	693	0.00189219	0.0241967	ENSMUSG00000020053|ENSMUSG00000007655|ENSMUSG00000028207|ENSMUSG00000004383|ENSMUSG00000063142|ENSMUSG00000044217|ENSMUSG00000023964|ENSMUSG00000028573|ENSMUSG00000038685|ENSMUSG00000036196|ENSMUSG00000037242|ENSMUSG00000058301|ENSMUSG00000033685|ENSMUSG00000027584|ENSMUSG00000056978|ENSMUSG00000037025|ENSMUSG00000026576|ENSMUSG00000030562|ENSMUSG00000028635|ENSMUSG00000024270|ENSMUSG00000043051|…	http://amigo.geneontology.org/cgi-bin/amigo/term_details?term=GO:0019725
ubiquitin-like protein transferase activity	Gene Ontology	GO:0019787	39	371	0.00190606	0.0243385	ENSMUSG00000090213|ENSMUSG00000021712|ENSMUSG00000078923|ENSMUSG00000020696|ENSMUSG00000029203|ENSMUSG00000054978|ENSMUSG00000023286|ENSMUSG00000026455|ENSMUSG00000032688|ENSMUSG00000025893|ENSMUSG00000032405|ENSMUSG00000022750|ENSMUSG00000015120|ENSMUSG00000038175|ENSMUSG00000026637|ENSMUSG00000036822|ENSMUSG00000020376|ENSMUSG00000039159|ENSMUSG00000026484|ENSMUSG00000040782|ENSMUSG00000078578|…	http://amigo.geneontology.org/cgi-bin/amigo/term_details?term=GO:0019787
endomembrane system organization	Gene Ontology	GO:0010256	44	434	0.00193871	0.0247192	ENSMUSG00000053198|ENSMUSG00000021248|ENSMUSG00000049550|ENSMUSG00000026825|ENSMUSG00000063450|ENSMUSG00000031753|ENSMUSG00000023964|ENSMUSG00000028572|ENSMUSG00000022982|ENSMUSG00000030643|ENSMUSG00000049493|ENSMUSG00000025162|ENSMUSG00000033335|ENSMUSG00000022200|ENSMUSG00000079056|ENSMUSG00000019942|ENSMUSG00000025006|ENSMUSG00000062300|ENSMUSG00000038708|ENSMUSG00000031788|ENSMUSG00000028995|…	http://amigo.geneontology.org/cgi-bin/amigo/term_details?term=GO:0010256
cell adhesion molecule binding	Gene Ontology	GO:0050839	40	384	0.00195386	0.0248761	ENSMUSG00000020053|ENSMUSG00000027540|ENSMUSG00000028552|ENSMUSG00000033031|ENSMUSG00000016487|ENSMUSG00000031207|ENSMUSG00000022565|ENSMUSG00000031302|ENSMUSG00000031565|ENSMUSG00000031928|ENSMUSG00000025162|ENSMUSG00000030847|ENSMUSG00000004591|ENSMUSG00000022656|ENSMUSG00000062300|ENSMUSG00000025504|ENSMUSG00000039457|ENSMUSG00000021282|ENSMUSG00000009687|ENSMUSG00000058835|ENSMUSG00000069601|…	http://amigo.geneontology.org/cgi-bin/amigo/term_details?term=GO:0050839
positive regulation of programmed cell death	Gene Ontology	GO:0043068	50	511	0.00197228	0.0250741	ENSMUSG00000036390|ENSMUSG00000050395|ENSMUSG00000053279|ENSMUSG00000003031|ENSMUSG00000028341|ENSMUSG00000053965|ENSMUSG00000029207|ENSMUSG00000031548|ENSMUSG00000030562|ENSMUSG00000026283|ENSMUSG00000026288|ENSMUSG00000039959|ENSMUSG00000071337|ENSMUSG00000029821|ENSMUSG00000004054|ENSMUSG00000022982|ENSMUSG00000046949|ENSMUSG00000042724|ENSMUSG00000020653|ENSMUSG00000032171|ENSMUSG00000032359|…	http://amigo.geneontology.org/cgi-bin/amigo/term_details?term=GO:0043068
acylglycerol metabolic process	Gene Ontology	GO:0006639	15	96	0.00198303	0.0251375	ENSMUSG00000033174|ENSMUSG00000002279|ENSMUSG00000007655|ENSMUSG00000031545|ENSMUSG00000024042|ENSMUSG00000024052|ENSMUSG00000002985|ENSMUSG00000032083|ENSMUSG00000032193|ENSMUSG00000057074|ENSMUSG00000019768|ENSMUSG00000003123|ENSMUSG00000078650|ENSMUSG00000015568|ENSMUSG00000025509	http://amigo.geneontology.org/cgi-bin/amigo/term_details?term=GO:0006639
DNA integrity checkpoint	Gene Ontology	GO:0031570	15	96	0.00198303	0.0251375	ENSMUSG00000031928|ENSMUSG00000022184|ENSMUSG00000030094|ENSMUSG00000076431|ENSMUSG00000061288|ENSMUSG00000037474|ENSMUSG00000019942|ENSMUSG00000017485|ENSMUSG00000052139|ENSMUSG00000028999|ENSMUSG00000022510|ENSMUSG00000016528|ENSMUSG00000043909|ENSMUSG00000028821|ENSMUSG00000033102	http://amigo.geneontology.org/cgi-bin/amigo/term_details?term=GO:0031570
poly(A) RNA binding	Gene Ontology	GO:0044822	85	979	0.00201553	0.0254756	ENSMUSG00000040213|ENSMUSG00000059208|ENSMUSG00000000827|ENSMUSG00000002017|ENSMUSG00000055531|ENSMUSG00000021660|ENSMUSG00000037992|ENSMUSG00000041438|ENSMUSG00000025626|ENSMUSG00000039756|ENSMUSG00000033423|ENSMUSG00000003970|ENSMUSG00000031586|ENSMUSG00000020300|ENSMUSG00000044155|ENSMUSG00000022565|ENSMUSG00000028821|ENSMUSG00000003299|ENSMUSG00000022433|ENSMUSG00000058301|ENSMUSG00000026234|…	http://amigo.geneontology.org/cgi-bin/amigo/term_details?term=GO:0044822
lung alveolus development	Gene Ontology	GO:0048286	10	49	0.00202289	0.0255317	ENSMUSG00000020053|ENSMUSG00000071072|ENSMUSG00000030849|ENSMUSG00000024940|ENSMUSG00000028635|ENSMUSG00000059325|ENSMUSG00000025856|ENSMUSG00000032327|ENSMUSG00000045680|ENSMUSG00000005320	http://amigo.geneontology.org/cgi-bin/amigo/term_details?term=GO:0048286
response to peptide	Gene Ontology	GO:1901652	30	263	0.00203167	0.0256055	ENSMUSG00000048583|ENSMUSG00000020027|ENSMUSG00000026826|ENSMUSG00000034165|ENSMUSG00000022383|ENSMUSG00000027540|ENSMUSG00000021134|ENSMUSG00000018566|ENSMUSG00000027288|ENSMUSG00000028341|ENSMUSG00000005534|ENSMUSG00000052374|ENSMUSG00000028639|ENSMUSG00000026778|ENSMUSG00000004698|ENSMUSG00000021025|ENSMUSG00000020053|ENSMUSG00000026812|ENSMUSG00000055737|ENSMUSG00000024122|ENSMUSG00000031490|…	http://amigo.geneontology.org/cgi-bin/amigo/term_details?term=GO:1901652
in utero embryonic development	Gene Ontology	GO:0001701	40	385	0.00203877	0.0256579	ENSMUSG00000020911|ENSMUSG00000022382|ENSMUSG00000059325|ENSMUSG00000028023|ENSMUSG00000021466|ENSMUSG00000029131|ENSMUSG00000022528|ENSMUSG00000037025|ENSMUSG00000045005|ENSMUSG00000030849|ENSMUSG00000028639|ENSMUSG00000028933|ENSMUSG00000031565|ENSMUSG00000020937|ENSMUSG00000024440|ENSMUSG00000010760|ENSMUSG00000028821|ENSMUSG00000022286|ENSMUSG00000000751|ENSMUSG00000020647|ENSMUSG00000020053|…	http://amigo.geneontology.org/cgi-bin/amigo/term_details?term=GO:0001701
regulation of protein polymerization	Gene Ontology	GO:0032271	20	149	0.0020668	0.0259418	ENSMUSG00000019970|ENSMUSG00000018411|ENSMUSG00000029621|ENSMUSG00000039621|ENSMUSG00000028745|ENSMUSG00000021338|ENSMUSG00000029465|ENSMUSG00000021573|ENSMUSG00000049550|ENSMUSG00000006304|ENSMUSG00000028832|ENSMUSG00000058624|ENSMUSG00000038013|ENSMUSG00000003031|ENSMUSG00000031558|ENSMUSG00000058587|ENSMUSG00000056367|ENSMUSG00000004814|ENSMUSG00000041598|ENSMUSG00000007655	http://amigo.geneontology.org/cgi-bin/amigo/term_details?term=GO:0032271
positive regulation of mitotic cell cycle	Gene Ontology	GO:0045931	17	117	0.00207023	0.0259418	ENSMUSG00000048583|ENSMUSG00000020053|ENSMUSG00000036923|ENSMUSG00000031095|ENSMUSG00000000787|ENSMUSG00000019942|ENSMUSG00000032010|ENSMUSG00000004591|ENSMUSG00000031490|ENSMUSG00000048904|ENSMUSG00000058587|ENSMUSG00000005534|ENSMUSG00000034683|ENSMUSG00000022528|ENSMUSG00000031565|ENSMUSG00000022018|ENSMUSG00000061878	http://amigo.geneontology.org/cgi-bin/amigo/term_details?term=GO:0045931
cardiac ventricle development	Gene Ontology	GO:0003231	17	117	0.00207023	0.0259418	ENSMUSG00000020170|ENSMUSG00000033335|ENSMUSG00000057123|ENSMUSG00000027966|ENSMUSG00000030849|ENSMUSG00000076431|ENSMUSG00000026414|ENSMUSG00000054889|ENSMUSG00000050288|ENSMUSG00000028023|ENSMUSG00000015957|ENSMUSG00000032327|ENSMUSG00000022528|ENSMUSG00000022286|ENSMUSG00000005583|ENSMUSG00000063632|ENSMUSG00000037236	http://amigo.geneontology.org/cgi-bin/amigo/term_details?term=GO:0003231
ossification	Gene Ontology	GO:0001503	36	336	0.0020837	0.0260731	ENSMUSG00000048583|ENSMUSG00000020053|ENSMUSG00000019359|ENSMUSG00000022382|ENSMUSG00000020003|ENSMUSG00000030218|ENSMUSG00000029304|ENSMUSG00000023964|ENSMUSG00000056501|ENSMUSG00000031565|ENSMUSG00000027833|ENSMUSG00000030849|ENSMUSG00000036334|ENSMUSG00000017119|ENSMUSG00000031681|ENSMUSG00000024039|ENSMUSG00000048546|ENSMUSG00000013622|ENSMUSG00000027523|ENSMUSG00000024176|ENSMUSG00000005583|…	http://amigo.geneontology.org/cgi-bin/amigo/term_details?term=GO:0001503
zinc ion binding	Gene Ontology	GO:0008270	80	912	0.00209313	0.0261536	ENSMUSG00000021458|ENSMUSG00000026826|ENSMUSG00000023262|ENSMUSG00000022534|ENSMUSG00000022383|ENSMUSG00000037992|ENSMUSG00000034610|ENSMUSG00000024299|ENSMUSG00000021712|ENSMUSG00000058624|ENSMUSG00000040694|ENSMUSG00000026875|ENSMUSG00000020696|ENSMUSG00000022056|ENSMUSG00000028341|ENSMUSG00000057719|ENSMUSG00000058240|ENSMUSG00000015837|ENSMUSG00000019278|ENSMUSG00000049090|ENSMUSG00000058301|…	http://amigo.geneontology.org/cgi-bin/amigo/term_details?term=GO:0008270
cadherin binding involved in cell-cell adhesion	Gene Ontology	GO:0098641	28	240	0.00209797	0.0261766	ENSMUSG00000027540|ENSMUSG00000028552|ENSMUSG00000033031|ENSMUSG00000016487|ENSMUSG00000022565|ENSMUSG00000031928|ENSMUSG00000025162|ENSMUSG00000030847|ENSMUSG00000004591|ENSMUSG00000025504|ENSMUSG00000039457|ENSMUSG00000021282|ENSMUSG00000058835|ENSMUSG00000029407|ENSMUSG00000038366|ENSMUSG00000024941|ENSMUSG00000051695|ENSMUSG00000042426|ENSMUSG00000025060|ENSMUSG00000026860|ENSMUSG00000026305|…	http://amigo.geneontology.org/cgi-bin/amigo/term_details?term=GO:0098641
glucocorticoid receptor binding	Gene Ontology	GO:0035259	6	18	0.0021098	0.0262867	ENSMUSG00000026826|ENSMUSG00000004040|ENSMUSG00000022895|ENSMUSG00000056501|ENSMUSG00000028341|ENSMUSG00000048490	http://amigo.geneontology.org/cgi-bin/amigo/term_details?term=GO:0035259
mRNA processing	Gene Ontology	GO:0006397	38	361	0.00211565	0.026322	ENSMUSG00000030216|ENSMUSG00000052144|ENSMUSG00000059208|ENSMUSG00000031586|ENSMUSG00000044155|ENSMUSG00000035851|ENSMUSG00000040728|ENSMUSG00000022194|ENSMUSG00000029625|ENSMUSG00000041459|ENSMUSG00000025024|ENSMUSG00000056305|ENSMUSG00000031433|ENSMUSG00000037296|ENSMUSG00000028809|ENSMUSG00000052551|ENSMUSG00000005150|ENSMUSG00000021134|ENSMUSG00000071337|ENSMUSG00000028821|ENSMUSG00000030204|…	http://amigo.geneontology.org/cgi-bin/amigo/term_details?term=GO:0006397
cardiac muscle tissue development	Gene Ontology	GO:0048738	24	194	0.00212618	0.0264155	ENSMUSG00000020053|ENSMUSG00000057123|ENSMUSG00000037992|ENSMUSG00000028023|ENSMUSG00000045414|ENSMUSG00000030562|ENSMUSG00000030849|ENSMUSG00000007880|ENSMUSG00000026414|ENSMUSG00000054889|ENSMUSG00000019942|ENSMUSG00000031681|ENSMUSG00000031565|ENSMUSG00000019777|ENSMUSG00000005583|ENSMUSG00000032171|ENSMUSG00000045092|ENSMUSG00000026812|ENSMUSG00000027966|ENSMUSG00000024042|ENSMUSG00000030470|…	http://amigo.geneontology.org/cgi-bin/amigo/term_details?term=GO:0048738
cell differentiation involved in kidney development	Gene Ontology	GO:0061005	9	41	0.00217889	0.0270319	ENSMUSG00000022353|ENSMUSG00000021466|ENSMUSG00000030087|ENSMUSG00000014303|ENSMUSG00000029086|ENSMUSG00000045680|ENSMUSG00000022528|ENSMUSG00000027803|ENSMUSG00000005583	http://amigo.geneontology.org/cgi-bin/amigo/term_details?term=GO:0061005
cation transport	Gene Ontology	GO:0006812	69	765	0.00221596	0.0274222	ENSMUSG00000020053|ENSMUSG00000021699|ENSMUSG00000020261|ENSMUSG00000020432|ENSMUSG00000057123|ENSMUSG00000050511|ENSMUSG00000028238|ENSMUSG00000019210|ENSMUSG00000031748|ENSMUSG00000022528|ENSMUSG00000052374|ENSMUSG00000003072|ENSMUSG00000020823|ENSMUSG00000019558|ENSMUSG00000027584|ENSMUSG00000056978|ENSMUSG00000033998|ENSMUSG00000026576|ENSMUSG00000031012|ENSMUSG00000079056|ENSMUSG00000027523|…	http://amigo.geneontology.org/cgi-bin/amigo/term_details?term=GO:0006812
multi-organism process	Gene Ontology	GO:0051704	123	1515	0.00221954	0.0274222	ENSMUSG00000024922|ENSMUSG00000025326|ENSMUSG00000016528|ENSMUSG00000021264|ENSMUSG00000037242|ENSMUSG00000058301|ENSMUSG00000020451|ENSMUSG00000056978|ENSMUSG00000004591|ENSMUSG00000030249|ENSMUSG00000030595|ENSMUSG00000020115|ENSMUSG00000024175|ENSMUSG00000024176|ENSMUSG00000015120|ENSMUSG00000032498|ENSMUSG00000024049|ENSMUSG00000021699|ENSMUSG00000031883|ENSMUSG00000027598|ENSMUSG00000039936|…	http://amigo.geneontology.org/cgi-bin/amigo/term_details?term=GO:0051704
response to cytokine	Gene Ontology	GO:0034097	46	463	0.00223088	0.0274222	ENSMUSG00000020027|ENSMUSG00000029417|ENSMUSG00000020009|ENSMUSG00000021264|ENSMUSG00000031548|ENSMUSG00000003032|ENSMUSG00000032083|ENSMUSG00000018566|ENSMUSG00000020696|ENSMUSG00000056501|ENSMUSG00000016528|ENSMUSG00000014776|ENSMUSG00000070904|ENSMUSG00000005534|ENSMUSG00000037025|ENSMUSG00000058301|ENSMUSG00000029203|ENSMUSG00000050069|ENSMUSG00000028635|ENSMUSG00000034610|ENSMUSG00000003184|…	http://amigo.geneontology.org/cgi-bin/amigo/term_details?term=GO:0034097
signal transducer activity	Gene Ontology	GO:0004871	97	1149	0.0022313	0.0274222	ENSMUSG00000050558|ENSMUSG00000016528|ENSMUSG00000030110|ENSMUSG00000029055|ENSMUSG00000045005|ENSMUSG00000030849|ENSMUSG00000004054|ENSMUSG00000032336|ENSMUSG00000070509|ENSMUSG00000027947|ENSMUSG00000059146|ENSMUSG00000030471|ENSMUSG00000044534|ENSMUSG00000044724|ENSMUSG00000061288|ENSMUSG00000034881|ENSMUSG00000019768|ENSMUSG00000035305|ENSMUSG00000026826|ENSMUSG00000028341|ENSMUSG00000022383|…	http://amigo.geneontology.org/cgi-bin/amigo/term_details?term=GO:0004871
ventricular septum morphogenesis	Gene Ontology	GO:0060412	8	33	0.00223261	0.0274222	ENSMUSG00000057123|ENSMUSG00000030849|ENSMUSG00000076431|ENSMUSG00000050288|ENSMUSG00000028023|ENSMUSG00000015957|ENSMUSG00000022528|ENSMUSG00000063632	http://amigo.geneontology.org/cgi-bin/amigo/term_details?term=GO:0060412
plasma lipoprotein particle	Gene Ontology	GO:0034358	8	33	0.00223261	0.0274222	ENSMUSG00000015243|ENSMUSG00000049313|ENSMUSG00000002985|ENSMUSG00000002588|ENSMUSG00000032193|ENSMUSG00000075701|ENSMUSG00000032083|ENSMUSG00000015568	http://amigo.geneontology.org/cgi-bin/amigo/term_details?term=GO:0034358
lipoprotein particle	Gene Ontology	GO:1990777	8	33	0.00223261	0.0274222	ENSMUSG00000015243|ENSMUSG00000049313|ENSMUSG00000002985|ENSMUSG00000002588|ENSMUSG00000032193|ENSMUSG00000075701|ENSMUSG00000032083|ENSMUSG00000015568	http://amigo.geneontology.org/cgi-bin/amigo/term_details?term=GO:1990777
intrinsic apoptotic signaling pathway	Gene Ontology	GO:0097193	29	253	0.00223861	0.0274222	ENSMUSG00000037492|ENSMUSG00000027540|ENSMUSG00000009291|ENSMUSG00000075701|ENSMUSG00000056501|ENSMUSG00000029203|ENSMUSG00000018411|ENSMUSG00000029821|ENSMUSG00000061175|ENSMUSG00000023150|ENSMUSG00000021285|ENSMUSG00000019777|ENSMUSG00000036822|ENSMUSG00000032498|ENSMUSG00000022292|ENSMUSG00000032191|ENSMUSG00000022510|ENSMUSG00000028756|ENSMUSG00000042682|ENSMUSG00000022982|ENSMUSG00000037787|…	http://amigo.geneontology.org/cgi-bin/amigo/term_details?term=GO:0097193
apical plasma membrane	Gene Ontology	GO:0016324	29	253	0.00223861	0.0274222	ENSMUSG00000062252|ENSMUSG00000044217|ENSMUSG00000028238|ENSMUSG00000019210|ENSMUSG00000031207|ENSMUSG00000022565|ENSMUSG00000044359|ENSMUSG00000030562|ENSMUSG00000028645|ENSMUSG00000003484|ENSMUSG00000026576|ENSMUSG00000033998|ENSMUSG00000040808|ENSMUSG00000049044|ENSMUSG00000063142|ENSMUSG00000027947|ENSMUSG00000027692|ENSMUSG00000030340|ENSMUSG00000029086|ENSMUSG00000031075|ENSMUSG00000028402|…	http://amigo.geneontology.org/cgi-bin/amigo/term_details?term=GO:0016324
protein secretion	Gene Ontology	GO:0009306	44	438	0.00227157	0.0277869	ENSMUSG00000020053|ENSMUSG00000057123|ENSMUSG00000050395|ENSMUSG00000031488|ENSMUSG00000002897|ENSMUSG00000032083|ENSMUSG00000026778|ENSMUSG00000015568|ENSMUSG00000020848|ENSMUSG00000033685|ENSMUSG00000002279|ENSMUSG00000023349|ENSMUSG00000022200|ENSMUSG00000042265|ENSMUSG00000044811|ENSMUSG00000042682|ENSMUSG00000003184|ENSMUSG00000025220|ENSMUSG00000031842|ENSMUSG00000049044|ENSMUSG00000035621|…	http://amigo.geneontology.org/cgi-bin/amigo/term_details?term=GO:0009306
cellular protein catabolic process	Gene Ontology	GO:0044257	54	567	0.00228257	0.0278825	ENSMUSG00000009291|ENSMUSG00000043051|ENSMUSG00000022433|ENSMUSG00000020696|ENSMUSG00000031207|ENSMUSG00000015837|ENSMUSG00000029203|ENSMUSG00000025487|ENSMUSG00000023286|ENSMUSG00000025162|ENSMUSG00000002102|ENSMUSG00000032010|ENSMUSG00000010517|ENSMUSG00000032501|ENSMUSG00000012126|ENSMUSG00000032405|ENSMUSG00000014905|ENSMUSG00000014074|ENSMUSG00000013622|ENSMUSG00000024579|ENSMUSG00000032359|…	http://amigo.geneontology.org/cgi-bin/amigo/term_details?term=GO:0044257
positive regulation of non-canonical Wnt signaling pathway	Gene Ontology	GO:2000052	5	12	0.00229675	0.0280165	ENSMUSG00000022433|ENSMUSG00000019880|ENSMUSG00000025162|ENSMUSG00000031548|ENSMUSG00000040183	http://amigo.geneontology.org/cgi-bin/amigo/term_details?term=GO:2000052
transferase complex	Gene Ontology	GO:1990234	58	620	0.0023217	0.0282813	ENSMUSG00000034165|ENSMUSG00000023923|ENSMUSG00000069495|ENSMUSG00000078923|ENSMUSG00000057469|ENSMUSG00000004789|ENSMUSG00000005534|ENSMUSG00000017548|ENSMUSG00000054978|ENSMUSG00000023286|ENSMUSG00000026283|ENSMUSG00000026455|ENSMUSG00000027598|ENSMUSG00000025893|ENSMUSG00000027829|ENSMUSG00000010453|ENSMUSG00000031422|ENSMUSG00000022750|ENSMUSG00000004698|ENSMUSG00000019777|ENSMUSG00000015120|…	http://amigo.geneontology.org/cgi-bin/amigo/term_details?term=GO:1990234
cortical cytoskeleton	Gene Ontology	GO:0030863	13	78	0.00234262	0.0284964	ENSMUSG00000049493|ENSMUSG00000054808|ENSMUSG00000028745|ENSMUSG00000028906|ENSMUSG00000026288|ENSMUSG00000020911|ENSMUSG00000038366|ENSMUSG00000052374|ENSMUSG00000045180|ENSMUSG00000030244|ENSMUSG00000030340|ENSMUSG00000020782|ENSMUSG00000028645	http://amigo.geneontology.org/cgi-bin/amigo/term_details?term=GO:0030863
response to oxygen levels	Gene Ontology	GO:0070482	22	173	0.00234757	0.028517	ENSMUSG00000026826|ENSMUSG00000020300|ENSMUSG00000022383|ENSMUSG00000050511|ENSMUSG00000018566|ENSMUSG00000036923|ENSMUSG00000033685|ENSMUSG00000026576|ENSMUSG00000024039|ENSMUSG00000049001|ENSMUSG00000022018|ENSMUSG00000063142|ENSMUSG00000004328|ENSMUSG00000026812|ENSMUSG00000076431|ENSMUSG00000031490|ENSMUSG00000018893|ENSMUSG00000028756|ENSMUSG00000029135|ENSMUSG00000020108|ENSMUSG00000007655|…	http://amigo.geneontology.org/cgi-bin/amigo/term_details?term=GO:0070482
placenta development	Gene Ontology	GO:0001890	19	140	0.00235977	0.0286253	ENSMUSG00000061082|ENSMUSG00000020911|ENSMUSG00000030849|ENSMUSG00000020647|ENSMUSG00000022382|ENSMUSG00000020937|ENSMUSG00000024440|ENSMUSG00000010760|ENSMUSG00000029131|ENSMUSG00000007880|ENSMUSG00000003031|ENSMUSG00000019880|ENSMUSG00000022335|ENSMUSG00000092035|ENSMUSG00000022528|ENSMUSG00000022286|ENSMUSG00000045005|ENSMUSG00000020782|ENSMUSG00000056501	http://amigo.geneontology.org/cgi-bin/amigo/term_details?term=GO:0001890
neutral lipid metabolic process	Gene Ontology	GO:0006638	15	98	0.00236908	0.0286754	ENSMUSG00000033174|ENSMUSG00000002279|ENSMUSG00000007655|ENSMUSG00000031545|ENSMUSG00000024042|ENSMUSG00000024052|ENSMUSG00000002985|ENSMUSG00000032083|ENSMUSG00000032193|ENSMUSG00000057074|ENSMUSG00000019768|ENSMUSG00000003123|ENSMUSG00000078650|ENSMUSG00000015568|ENSMUSG00000025509	http://amigo.geneontology.org/cgi-bin/amigo/term_details?term=GO:0006638
GTPase binding	Gene Ontology	GO:0051020	30	266	0.00237046	0.0286754	ENSMUSG00000003233|ENSMUSG00000031488|ENSMUSG00000023923|ENSMUSG00000020263|ENSMUSG00000029192|ENSMUSG00000035901|ENSMUSG00000020790|ENSMUSG00000041598|ENSMUSG00000038546|ENSMUSG00000003134|ENSMUSG00000040260|ENSMUSG00000028639|ENSMUSG00000004054|ENSMUSG00000022982|ENSMUSG00000000167|ENSMUSG00000066232|ENSMUSG00000020130|ENSMUSG00000049044|ENSMUSG00000038708|ENSMUSG00000032356|ENSMUSG00000030220|…	http://amigo.geneontology.org/cgi-bin/amigo/term_details?term=GO:0051020
nucleocytoplasmic transport	Gene Ontology	GO:0006913	36	339	0.00238538	0.0288159	ENSMUSG00000029415|ENSMUSG00000002052|ENSMUSG00000059327|ENSMUSG00000050511|ENSMUSG00000031586|ENSMUSG00000022528|ENSMUSG00000022538|ENSMUSG00000045969|ENSMUSG00000022194|ENSMUSG00000032688|ENSMUSG00000019942|ENSMUSG00000045733|ENSMUSG00000010517|ENSMUSG00000042895|ENSMUSG00000066232|ENSMUSG00000026778|ENSMUSG00000014077|ENSMUSG00000030595|ENSMUSG00000021025|ENSMUSG00000020053|ENSMUSG00000026812|…	http://amigo.geneontology.org/cgi-bin/amigo/term_details?term=GO:0006913
canonical Wnt signaling pathway	Gene Ontology	GO:0060070	26	219	0.00239042	0.0288369	ENSMUSG00000030170|ENSMUSG00000022382|ENSMUSG00000040183|ENSMUSG00000059327|ENSMUSG00000003032|ENSMUSG00000024182|ENSMUSG00000045005|ENSMUSG00000025162|ENSMUSG00000030849|ENSMUSG00000049551|ENSMUSG00000043051|ENSMUSG00000019777|ENSMUSG00000032171|ENSMUSG00000076431|ENSMUSG00000050288|ENSMUSG00000019880|ENSMUSG00000038256|ENSMUSG00000022433|ENSMUSG00000027803|ENSMUSG00000025764|ENSMUSG00000031548|…	http://amigo.geneontology.org/cgi-bin/amigo/term_details?term=GO:0060070
actin filament bundle organization	Gene Ontology	GO:0061572	17	119	0.00242715	0.0292396	ENSMUSG00000045092|ENSMUSG00000049493|ENSMUSG00000026812|ENSMUSG00000037962|ENSMUSG00000032812|ENSMUSG00000022353|ENSMUSG00000030562|ENSMUSG00000024043|ENSMUSG00000022018|ENSMUSG00000015957|ENSMUSG00000054808|ENSMUSG00000026778|ENSMUSG00000032083|ENSMUSG00000021338|ENSMUSG00000016382|ENSMUSG00000025006|ENSMUSG00000033542	http://amigo.geneontology.org/cgi-bin/amigo/term_details?term=GO:0061572
posttranscriptional regulation of gene expression	Gene Ontology	GO:0010608	34	315	0.00244623	0.0294289	ENSMUSG00000020300|ENSMUSG00000016528|ENSMUSG00000037992|ENSMUSG00000023964|ENSMUSG00000021360|ENSMUSG00000020454|ENSMUSG00000058301|ENSMUSG00000028639|ENSMUSG00000041459|ENSMUSG00000071337|ENSMUSG00000034610|ENSMUSG00000039128|ENSMUSG00000040435|ENSMUSG00000045896|ENSMUSG00000041530|ENSMUSG00000020053|ENSMUSG00000026812|ENSMUSG00000076431|ENSMUSG00000031490|ENSMUSG00000026083|ENSMUSG00000028756|…	http://amigo.geneontology.org/cgi-bin/amigo/term_details?term=GO:0010608
ubiquitin protein ligase activity	Gene Ontology	GO:0061630	23	185	0.00245673	0.0294508	ENSMUSG00000090213|ENSMUSG00000055401|ENSMUSG00000020696|ENSMUSG00000029203|ENSMUSG00000023286|ENSMUSG00000040782|ENSMUSG00000038175|ENSMUSG00000036822|ENSMUSG00000039159|ENSMUSG00000026484|ENSMUSG00000033417|ENSMUSG00000023977|ENSMUSG00000027598|ENSMUSG00000025326|ENSMUSG00000031095|ENSMUSG00000028277|ENSMUSG00000022184|ENSMUSG00000032216|ENSMUSG00000078923|ENSMUSG00000030779|ENSMUSG00000060860|…	http://amigo.geneontology.org/cgi-bin/amigo/term_details?term=GO:0061630
negative regulation of protein transport	Gene Ontology	GO:0051224	23	185	0.00245673	0.0294508	ENSMUSG00000031488|ENSMUSG00000032083|ENSMUSG00000033685|ENSMUSG00000010517|ENSMUSG00000031842|ENSMUSG00000014077|ENSMUSG00000030595|ENSMUSG00000035621|ENSMUSG00000021025|ENSMUSG00000022018|ENSMUSG00000029524|ENSMUSG00000076431|ENSMUSG00000021678|ENSMUSG00000028277|ENSMUSG00000027803|ENSMUSG00000035828|ENSMUSG00000038147|ENSMUSG00000024939|ENSMUSG00000031548|ENSMUSG00000054459|ENSMUSG00000026074|…	http://amigo.geneontology.org/cgi-bin/amigo/term_details?term=GO:0051224
cellular catabolic process	Gene Ontology	GO:0044248	99	1181	0.00245817	0.0294508	ENSMUSG00000027540|ENSMUSG00000058624|ENSMUSG00000020696|ENSMUSG00000058301|ENSMUSG00000029203|ENSMUSG00000023286|ENSMUSG00000003484|ENSMUSG00000012126|ENSMUSG00000024579|ENSMUSG00000015120|ENSMUSG00000025509|ENSMUSG00000032498|ENSMUSG00000021699|ENSMUSG00000018189|ENSMUSG00000033417|ENSMUSG00000075701|ENSMUSG00000063428|ENSMUSG00000025326|ENSMUSG00000005514|ENSMUSG00000030967|ENSMUSG00000003279|…	http://amigo.geneontology.org/cgi-bin/amigo/term_details?term=GO:0044248
regulation of response to oxidative stress	Gene Ontology	GO:1902882	12	69	0.00249142	0.0298083	ENSMUSG00000029657|ENSMUSG00000004207|ENSMUSG00000038332|ENSMUSG00000043613|ENSMUSG00000022307|ENSMUSG00000036923|ENSMUSG00000028341|ENSMUSG00000032009|ENSMUSG00000028756|ENSMUSG00000021032|ENSMUSG00000022982|ENSMUSG00000014776	http://amigo.geneontology.org/cgi-bin/amigo/term_details?term=GO:1902882
positive regulation of cell motility	Gene Ontology	GO:2000147	40	390	0.00251302	0.0300256	ENSMUSG00000030170|ENSMUSG00000029417|ENSMUSG00000006304|ENSMUSG00000020053|ENSMUSG00000063450|ENSMUSG00000025856|ENSMUSG00000031443|ENSMUSG00000021360|ENSMUSG00000030110|ENSMUSG00000005534|ENSMUSG00000031565|ENSMUSG00000029484|ENSMUSG00000043613|ENSMUSG00000028635|ENSMUSG00000015957|ENSMUSG00000030562|ENSMUSG00000049044|ENSMUSG00000029291|ENSMUSG00000004698|ENSMUSG00000032359|ENSMUSG00000026064|…	http://amigo.geneontology.org/cgi-bin/amigo/term_details?term=GO:2000147
single-organism intracellular transport	Gene Ontology	GO:1902582	50	518	0.0025391	0.0302878	ENSMUSG00000019942|ENSMUSG00000021466|ENSMUSG00000063077|ENSMUSG00000063450|ENSMUSG00000020003|ENSMUSG00000009291|ENSMUSG00000059327|ENSMUSG00000050511|ENSMUSG00000031586|ENSMUSG00000054808|ENSMUSG00000028341|ENSMUSG00000014776|ENSMUSG00000022528|ENSMUSG00000024873|ENSMUSG00000018411|ENSMUSG00000045969|ENSMUSG00000049550|ENSMUSG00000045733|ENSMUSG00000010517|ENSMUSG00000042895|ENSMUSG00000066232|…	http://amigo.geneontology.org/cgi-bin/amigo/term_details?term=GO:1902582
[truncated: 139 more rows]

## Sheet: 7d Vs 0d
GO analysis of target genes in the comparison between day 7 and day 0 in the VILI group
Term	Database	ID	Input number	Background number	P-Value	Corrected P-Value	Input	Hyperlink
[truncated: 1,443 more rows]

## Sheet: 7d Vs Sham
GO analysis of target genes in the comparison between sham and VILI group on day 7
[truncated: 1,542 more rows]
