# Supplementary material for: Landscape of transcription and long non-coding RNAs reveals new insights into the inflammatory and fibrotic response following ventilator-induced lung injury
Source: Respir Res. 2018 Jun 22;19:122. doi: 10.1186/s12931-018-0822-z (PMC6013938; doi:10.1186/s12931-018-0822-z)
Supplement: Supplementary file 13 — Table S7. The entire list of dysregulated functional pathwyas of target genes in the comparisons of each pair. (XLSX 66 kb) [file 12931_2018_822_MOESM13_ESM.xlsx]

## Sheet: 0d Vs Sham
Pathway Analysis of target genes in the comparison between sham and VILI group on day 0
Term	Database	ID	Input number	Background number	P-Value	Corrected P-Value	Input	Hyperlink
Aldosterone-regulated sodium reabsorption	KEGG PATHWAY	mmu04960	10	40	0.000532194	0.00897848	ENSMUSG00000020053|ENSMUSG00000000216|ENSMUSG00000026576|ENSMUSG00000004988|ENSMUSG00000019970|ENSMUSG00000024122|ENSMUSG00000030340|ENSMUSG00000039936|ENSMUSG00000007107|ENSMUSG00000005534	http://www.genome.jp/kegg-bin/show_pathway?mmu04960/mmu:18607%09red/mmu:16000%09red/mmu:27222%09red/mmu:108017%09red/mmu:20393%09red/mmu:20276%09red/mmu:18707%09red/mmu:11931%09red/mmu:16337%09red/mmu:20278%09red
p53 signaling pathway	KEGG PATHWAY	mmu04115	13	68	0.000785495	0.0124285	ENSMUSG00000020053|ENSMUSG00000038332|ENSMUSG00000036390|ENSMUSG00000019979|ENSMUSG00000022292|ENSMUSG00000034165|ENSMUSG00000019942|ENSMUSG00000040782|ENSMUSG00000028212|ENSMUSG00000034730|ENSMUSG00000032009|ENSMUSG00000020649|ENSMUSG00000019851	http://www.genome.jp/kegg-bin/show_pathway?mmu04115/mmu:20135%09red/mmu:11783%09red/mmu:12448%09red/mmu:75747%09red/mmu:12445%09red/mmu:107831%09red/mmu:382985%09red/mmu:12534%09red/mmu:16000%09red/mmu:64058%09red/mmu:26374%09red/mmu:13197%09red/mmu:140742%09red
Pathways in cancer	KEGG PATHWAY	mmu05200	42	393	0.000980429	0.0146879	ENSMUSG00000030170|ENSMUSG00000021466|ENSMUSG00000022382|ENSMUSG00000037992|ENSMUSG00000020053|ENSMUSG00000031603|ENSMUSG00000027684|ENSMUSG00000025856|ENSMUSG00000089989|ENSMUSG00000003031|ENSMUSG00000030110|ENSMUSG00000024182|ENSMUSG00000045005|ENSMUSG00000028645|ENSMUSG00000042826|ENSMUSG00000071658|ENSMUSG00000030849|ENSMUSG00000040061|ENSMUSG00000031565|ENSMUSG00000049551|ENSMUSG00000020431|…	http://www.genome.jp/kegg-bin/show_pathway?mmu05200/mmu:12576%09red/mmu:432530%09red/mmu:22033%09red/mmu:15182%09red/mmu:14176%09red/mmu:22029%09red/mmu:12061%09red/mmu:18707%09red/mmu:12005%09red/mmu:15245%09red/mmu:26414%09red/mmu:20525%09red/mmu:14182%09red/mmu:14183%09red/mmu:22422%09red/mmu:18035%09red/mmu:19206%09red/mmu:14367%09red/mmu:14683%09red/mmu:19713%09red/mmu:20848%09red/mmu:14013%…
Transcriptional misregulation in cancer	KEGG PATHWAY	mmu05202	23	174	0.0012027	0.0169425	ENSMUSG00000037992|ENSMUSG00000025856|ENSMUSG00000028551|ENSMUSG00000056501|ENSMUSG00000028341|ENSMUSG00000022200|ENSMUSG00000043613|ENSMUSG00000031681|ENSMUSG00000025223|ENSMUSG00000019777|ENSMUSG00000005583|ENSMUSG00000020053|ENSMUSG00000039153|ENSMUSG00000060743|ENSMUSG00000029086|ENSMUSG00000026875|ENSMUSG00000029313|ENSMUSG00000025142|ENSMUSG00000058254|ENSMUSG00000029178|ENSMUSG00000003031|…	http://www.genome.jp/kegg-bin/show_pathway?mmu05202/mmu:12576%09red/mmu:68938%09red/mmu:15182%09red/mmu:12393%09red/mmu:16599%09red/mmu:19126%09red/mmu:21912%09red/mmu:15078%09red/mmu:17260%09red/mmu:22029%09red/mmu:18124%09red/mmu:16000%09red/mmu:18590%09red/mmu:66629%09red/mmu:19401%09red/mmu:12608%09red/mmu:16825%09red/mmu:17392%09red/mmu:18516%09red/mmu:17125%09red/mmu:17355%09red/mmu:16178%0…
Endocytosis	KEGG PATHWAY	mmu04144	32	278	0.00128957	0.0179922	ENSMUSG00000026825|ENSMUSG00000032812|ENSMUSG00000031489|ENSMUSG00000028552|ENSMUSG00000030110|ENSMUSG00000029621|ENSMUSG00000033335|ENSMUSG00000030849|ENSMUSG00000031488|ENSMUSG00000006304|ENSMUSG00000056185|ENSMUSG00000091705|ENSMUSG00000003269|ENSMUSG00000005320|ENSMUSG00000048480|ENSMUSG00000029465|ENSMUSG00000029462|ENSMUSG00000032193|ENSMUSG00000024867|ENSMUSG00000026180|ENSMUSG00000026860|…	http://www.genome.jp/kegg-bin/show_pathway?mmu04144/mmu:16396%09red/mmu:11556%09red/mmu:13429%09red/mmu:17999%09red/mmu:213990%09red/mmu:26431%09red/mmu:14186%09red/mmu:14183%09red/mmu:16835%09red/mmu:56433%09red/mmu:15013%09red/mmu:66251%09red/mmu:19713%09red/mmu:13430%09red/mmu:227700%09red/mmu:12345%09red/mmu:75767%09red/mmu:13858%09red/mmu:18719%09red/mmu:12389%09red/mmu:227288%09red/mmu:1915…
mTOR signaling pathway	KEGG PATHWAY	mmu04150	21	155	0.00146336	0.0198463	ENSMUSG00000020053|ENSMUSG00000030170|ENSMUSG00000061175|ENSMUSG00000026812|ENSMUSG00000036707|ENSMUSG00000022295|ENSMUSG00000022382|ENSMUSG00000049551|ENSMUSG00000049550|ENSMUSG00000019970|ENSMUSG00000050288|ENSMUSG00000025665|ENSMUSG00000024122|ENSMUSG00000015957|ENSMUSG00000031490|ENSMUSG00000039936|ENSMUSG00000019210|ENSMUSG00000020108|ENSMUSG00000005534|ENSMUSG00000003233|ENSMUSG00000045005	http://www.genome.jp/kegg-bin/show_pathway?mmu04150/mmu:18607%09red/mmu:11973%09red/mmu:22411%09red/mmu:13685%09red/mmu:12283%09red/mmu:57265%09red/mmu:16000%09red/mmu:20393%09red/mmu:22419%09red/mmu:66335%09red/mmu:22422%09red/mmu:13544%09red/mmu:56430%09red/mmu:14367%09red/mmu:64930%09red/mmu:14371%09red/mmu:329679%09red/mmu:18707%09red/mmu:74747%09red/mmu:67071%09red/mmu:16337%09red
Regulation of actin cytoskeleton	KEGG PATHWAY	mmu04810	26	216	0.00201403	0.0254756	ENSMUSG00000024048|ENSMUSG00000006304|ENSMUSG00000031207|ENSMUSG00000019254|ENSMUSG00000025856|ENSMUSG00000026737|ENSMUSG00000034868|ENSMUSG00000095845|ENSMUSG00000031565|ENSMUSG00000020451|ENSMUSG00000029621|ENSMUSG00000030849|ENSMUSG00000005320|ENSMUSG00000042826|ENSMUSG00000054808|ENSMUSG00000034116|ENSMUSG00000029465|ENSMUSG00000039936|ENSMUSG00000029337|ENSMUSG00000031603|ENSMUSG00000024867|…	http://www.genome.jp/kegg-bin/show_pathway?mmu04810/mmu:232807%09red/mmu:14176%09red/mmu:12061%09red/mmu:18707%09red/mmu:11472%09red/mmu:14186%09red/mmu:14182%09red/mmu:14183%09red/mmu:22324%09red/mmu:80857%09red/mmu:67268%09red/mmu:71960%09red/mmu:14166%09red/mmu:105855%09red/mmu:17698%09red/mmu:18590%09red/mmu:18719%09red/mmu:18718%09red/mmu:67938%09red/mmu:56378%09red/mmu:76709%09red/mmu:56443…
Insulin resistance	KEGG PATHWAY	mmu04931	16	110	0.00273314	0.031534	ENSMUSG00000046709|ENSMUSG00000022383|ENSMUSG00000027540|ENSMUSG00000004040|ENSMUSG00000026778|ENSMUSG00000024122|ENSMUSG00000025665|ENSMUSG00000021025|ENSMUSG00000018566|ENSMUSG00000030244|ENSMUSG00000005232|ENSMUSG00000005534|ENSMUSG00000078650|ENSMUSG00000039936|ENSMUSG00000025220|ENSMUSG00000028645	http://www.genome.jp/kegg-bin/show_pathway?mmu04931/mmu:18607%09red/mmu:19246%09red/mmu:26414%09red/mmu:20525%09red/mmu:67071%09red/mmu:20528%09red/mmu:18035%09red/mmu:14377%09red/mmu:232493%09red/mmu:20848%09red/mmu:18761%09red/mmu:18707%09red/mmu:19013%09red/mmu:76055%09red/mmu:16337%09red/mmu:14378%09red
Inositol phosphate metabolism	KEGG PATHWAY	mmu00562	12	71	0.00306658	0.0345594	ENSMUSG00000029055|ENSMUSG00000040061|ENSMUSG00000026288|ENSMUSG00000020937|ENSMUSG00000026113|ENSMUSG00000023456|ENSMUSG00000039943|ENSMUSG00000039936|ENSMUSG00000024867|ENSMUSG00000060733|ENSMUSG00000026737|ENSMUSG00000015214	http://www.genome.jp/kegg-bin/show_pathway?mmu00562/mmu:269615%09red/mmu:21991%09red/mmu:69718%09red/mmu:72469%09red/mmu:53332%09red/mmu:18796%09red/mmu:18719%09red/mmu:18718%09red/mmu:269180%09red/mmu:16331%09red/mmu:18707%09red/mmu:18798%09red
FoxO signaling pathway	KEGG PATHWAY	mmu04068	18	134	0.00334077	0.0370182	ENSMUSG00000045092|ENSMUSG00000020053|ENSMUSG00000030161|ENSMUSG00000036390|ENSMUSG00000019970|ENSMUSG00000004040|ENSMUSG00000046709|ENSMUSG00000024122|ENSMUSG00000031666|ENSMUSG00000018566|ENSMUSG00000003031|ENSMUSG00000005232|ENSMUSG00000039304|ENSMUSG00000005534|ENSMUSG00000078650|ENSMUSG00000039936|ENSMUSG00000073802|ENSMUSG00000022433	http://www.genome.jp/kegg-bin/show_pathway?mmu04068/mmu:18607%09red/mmu:26414%09red/mmu:27373%09red/mmu:12576%09red/mmu:13609%09red/mmu:20528%09red/mmu:16000%09red/mmu:57436%09red/mmu:22035%09red/mmu:12579%09red/mmu:14377%09red/mmu:16337%09red/mmu:20848%09red/mmu:20393%09red/mmu:18707%09red/mmu:13197%09red/mmu:19651%09red/mmu:14378%09red
Viral carcinogenesis	KEGG PATHWAY	mmu05203	26	226	0.0035076	0.0382942	ENSMUSG00000034165|ENSMUSG00000025326|ENSMUSG00000028238|ENSMUSG00000091705|ENSMUSG00000016528|ENSMUSG00000019942|ENSMUSG00000003184|ENSMUSG00000017007|ENSMUSG00000054808|ENSMUSG00000004698|ENSMUSG00000021025|ENSMUSG00000019777|ENSMUSG00000024154|ENSMUSG00000028212|ENSMUSG00000026875|ENSMUSG00000039936|ENSMUSG00000031666|ENSMUSG00000096010|ENSMUSG00000025498|ENSMUSG00000004040|ENSMUSG00000052374|…	http://www.genome.jp/kegg-bin/show_pathway?mmu05203/mmu:17164%09red/mmu:12576%09red/mmu:22033%09red/mmu:15182%09red/mmu:13205%09red/mmu:12534%09red/mmu:18707%09red/mmu:79221%09red/mmu:242341%09red/mmu:11472%09red/mmu:18035%09red/mmu:15013%09red/mmu:54131%09red/mmu:20848%09red/mmu:12579%09red/mmu:19651%09red/mmu:22029%09red/mmu:237336%09red/mmu:71828%09red/mmu:320332%09red/mmu:12448%09red/mmu:1244…
Basal cell carcinoma	KEGG PATHWAY	mmu05217	10	55	0.00420412	0.043765	ENSMUSG00000030170|ENSMUSG00000021466|ENSMUSG00000022382|ENSMUSG00000049551|ENSMUSG00000064325|ENSMUSG00000050288|ENSMUSG00000003233|ENSMUSG00000015957|ENSMUSG00000024182|ENSMUSG00000045005	http://www.genome.jp/kegg-bin/show_pathway?mmu05217/mmu:57265%09red/mmu:22411%09red/mmu:15245%09red/mmu:22419%09red/mmu:22422%09red/mmu:13544%09red/mmu:19206%09red/mmu:14367%09red/mmu:14371%09red/mmu:12005%09red
MAPK signaling pathway	KEGG PATHWAY	mmu04010	28	254	0.00431778	0.0446819	ENSMUSG00000042826|ENSMUSG00000036390|ENSMUSG00000027684|ENSMUSG00000025856|ENSMUSG00000016528|ENSMUSG00000031565|ENSMUSG00000033016|ENSMUSG00000018411|ENSMUSG00000030849|ENSMUSG00000004054|ENSMUSG00000024235|ENSMUSG00000032356|ENSMUSG00000005320|ENSMUSG00000005583|ENSMUSG00000021708|ENSMUSG00000046709|ENSMUSG00000021250|ENSMUSG00000029337|ENSMUSG00000031603|ENSMUSG00000095845|ENSMUSG00000024242|…	http://www.genome.jp/kegg-bin/show_pathway?mmu04010/mmu:17260%09red/mmu:17164%09red/mmu:14013%09red/mmu:14176%09red/mmu:330177%09red/mmu:19418%09red/mmu:102626%09red/mmu:17762%09red/mmu:13197%09red/mmu:26921%09red/mmu:26414%09red/mmu:14182%09red/mmu:14183%09red/mmu:67071%09red/mmu:18018%09red/mmu:225028%09red/mmu:240672%09red/mmu:80857%09red/mmu:16765%09red/mmu:19417%09red/mmu:14166%09red/mmu:141…
Circadian entrainment	KEGG PATHWAY	mmu04713	14	96	0.00478301	0.0482946	ENSMUSG00000071658|ENSMUSG00000039943|ENSMUSG00000040061|ENSMUSG00000033910|ENSMUSG00000020431|ENSMUSG00000021250|ENSMUSG00000049892|ENSMUSG00000031748|ENSMUSG00000027523|ENSMUSG00000095845|ENSMUSG00000036438|ENSMUSG00000020524|ENSMUSG00000020893|ENSMUSG00000063594	http://www.genome.jp/kegg-bin/show_pathway?mmu04713/mmu:14709%09red/mmu:12314%09red/mmu:432530%09red/mmu:14681%09red/mmu:18626%09red/mmu:14281%09red/mmu:14683%09red/mmu:18796%09red/mmu:14704%09red/mmu:14799%09red/mmu:60596%09red/mmu:19416%09red/mmu:18798%09red/mmu:100503710%09red
Fc gamma R-mediated phagocytosis	KEGG PATHWAY	mmu04666	13	86	0.0049242	0.0493777	ENSMUSG00000069662|ENSMUSG00000029621|ENSMUSG00000033335|ENSMUSG00000034116|ENSMUSG00000006304|ENSMUSG00000026288|ENSMUSG00000029465|ENSMUSG00000039936|ENSMUSG00000020451|ENSMUSG00000015950|ENSMUSG00000024867|ENSMUSG00000061878|ENSMUSG00000026395	http://www.genome.jp/kegg-bin/show_pathway?mmu04666/mmu:22324%09red/mmu:18719%09red/mmu:17969%09red/mmu:19264%09red/mmu:56378%09red/mmu:76709%09red/mmu:56443%09red/mmu:17118%09red/mmu:16331%09red/mmu:18707%09red/mmu:20698%09red/mmu:16886%09red/mmu:13430%09red
cAMP signaling pathway	KEGG PATHWAY	mmu04024	23	197	0.00494263	0.0495056	ENSMUSG00000022383|ENSMUSG00000020431|ENSMUSG00000049241|ENSMUSG00000021466|ENSMUSG00000036438|ENSMUSG00000033016|ENSMUSG00000028525|ENSMUSG00000026576|ENSMUSG00000031842|ENSMUSG00000049044|ENSMUSG00000021025|ENSMUSG00000027523|ENSMUSG00000046709|ENSMUSG00000021699|ENSMUSG00000034116|ENSMUSG00000021250|ENSMUSG00000064325|ENSMUSG00000039936|ENSMUSG00000003123|ENSMUSG00000020524|ENSMUSG00000032849|…	http://www.genome.jp/kegg-bin/show_pathway?mmu04024/mmu:15245%09red/mmu:12314%09red/mmu:432530%09red/mmu:18707%09red/mmu:26414%09red/mmu:27222%09red/mmu:18035%09red/mmu:19206%09red/mmu:239273%09red/mmu:14683%09red/mmu:56508%09red/mmu:18018%09red/mmu:16890%09red/mmu:110385%09red/mmu:22324%09red/mmu:14281%09red/mmu:238871%09red/mmu:19013%09red/mmu:20609%09red/mmu:18578%09red/mmu:14799%09red/mmu:243…

## Sheet: 7d Vs 0d
Pathway Analysis of target genes in the comparison between day 7 and day 0 in the VILI group
Term	Database	ID	Input number	Background number	P-Value	Corrected P-Value	Input	Hyperlink
Endocytosis	KEGG PATHWAY	mmu04144	76	278	3.92568e-07	9.30973e-06	ENSMUSG00000033916|ENSMUSG00000026825|ENSMUSG00000037062|ENSMUSG00000032812|ENSMUSG00000006304|ENSMUSG00000022150|ENSMUSG00000028552|ENSMUSG00000029648|ENSMUSG00000026860|ENSMUSG00000038467|ENSMUSG00000091705|ENSMUSG00000030110|ENSMUSG00000011877|ENSMUSG00000030465|ENSMUSG00000029053|ENSMUSG00000020817|ENSMUSG00000033335|ENSMUSG00000028488|ENSMUSG00000031488|ENSMUSG00000014550|ENSMUSG00000038013|…	http://www.genome.jp/kegg-bin/show_pathway?mmu04144/mmu:16396%09red/mmu:271457%09red/mmu:11840%09red/mmu:54189%09red/mmu:22034%09red/mmu:74325%09red/mmu:208650%09red/mmu:71955%09red/mmu:18720%09red/mmu:213990%09red/mmu:18762%09red/mmu:12390%09red/mmu:14997%09red/mmu:20404%09red/mmu:215280%09red/mmu:26431%09red/mmu:13867%09red/mmu:14186%09red/mmu:19349%09red/mmu:14183%09red/mmu:52348%09red/mmu:168…
Chagas disease (American trypanosomiasis)	KEGG PATHWAY	mmu05142	37	103	2.82784e-06	5.58218e-05	ENSMUSG00000020366|ENSMUSG00000020349|ENSMUSG00000020826|ENSMUSG00000009630|ENSMUSG00000016529|ENSMUSG00000036887|ENSMUSG00000027665|ENSMUSG00000040061|ENSMUSG00000032562|ENSMUSG00000029120|ENSMUSG00000022052|ENSMUSG00000032058|ENSMUSG00000027523|ENSMUSG00000036905|ENSMUSG00000031392|ENSMUSG00000046709|ENSMUSG00000000817|ENSMUSG00000024500|ENSMUSG00000022965|ENSMUSG00000021250|ENSMUSG00000051498|…	http://www.genome.jp/kegg-bin/show_pathway?mmu05142/mmu:73699%09red/mmu:71978%09red/mmu:14683%09red/mmu:14680%09red/mmu:22034%09red/mmu:269643%09red/mmu:18706%09red/mmu:18707%09red/mmu:16193%09red/mmu:12259%09red/mmu:21926%09red/mmu:26415%09red/mmu:26414%09red/mmu:26413%09red/mmu:320207%09red/mmu:20302%09red/mmu:19053%09red/mmu:19052%09red/mmu:14103%09red/mmu:17126%09red/mmu:15980%09red/mmu:14678…
FoxO signaling pathway	KEGG PATHWAY	mmu04068	43	134	5.10123e-06	9.54842e-05	ENSMUSG00000029513|ENSMUSG00000020366|ENSMUSG00000078566|ENSMUSG00000019970|ENSMUSG00000022521|ENSMUSG00000022433|ENSMUSG00000018566|ENSMUSG00000027381|ENSMUSG00000038894|ENSMUSG00000016529|ENSMUSG00000034801|ENSMUSG00000005533|ENSMUSG00000017376|ENSMUSG00000027665|ENSMUSG00000024515|ENSMUSG00000022710|ENSMUSG00000025422|ENSMUSG00000078650|ENSMUSG00000024563|ENSMUSG00000048756|ENSMUSG00000046709|…	http://www.genome.jp/kegg-bin/show_pathway?mmu04068/mmu:252870%09red/mmu:12575%09red/mmu:16653%09red/mmu:12125%09red/mmu:12579%09red/mmu:22035%09red/mmu:384783%09red/mmu:18706%09red/mmu:18707%09red/mmu:16193%09red/mmu:18607%09red/mmu:26415%09red/mmu:26414%09red/mmu:26413%09red/mmu:20528%09red/mmu:320207%09red/mmu:20848%09red/mmu:20663%09red/mmu:20869%09red/mmu:19651%09red/mmu:14103%09red/mmu:1809…
Epstein-Barr virus infection	KEGG PATHWAY	mmu05169	57	210	1.25099e-05	0.000213565	ENSMUSG00000020366|ENSMUSG00000018965|ENSMUSG00000029478|ENSMUSG00000005198|ENSMUSG00000005625|ENSMUSG00000005087|ENSMUSG00000028874|ENSMUSG00000022521|ENSMUSG00000031585|ENSMUSG00000003184|ENSMUSG00000016529|ENSMUSG00000026616|ENSMUSG00000025487|ENSMUSG00000026313|ENSMUSG00000027665|ENSMUSG00000022710|ENSMUSG00000019942|ENSMUSG00000091705|ENSMUSG00000031805|ENSMUSG00000017007|ENSMUSG00000002102|…	http://www.genome.jp/kegg-bin/show_pathway?mmu05169/mmu:252870%09red/mmu:18749%09red/mmu:12575%09red/mmu:22031%09red/mmu:22034%09red/mmu:12534%09red/mmu:15013%09red/mmu:18706%09red/mmu:18707%09red/mmu:14997%09red/mmu:70428%09red/mmu:19231%09red/mmu:26415%09red/mmu:26414%09red/mmu:20602%09red/mmu:68652%09red/mmu:22631%09red/mmu:22630%09red/mmu:12902%09red/mmu:18036%09red/mmu:21374%09red/mmu:20020%…
Tuberculosis	KEGG PATHWAY	mmu05152	50	176	1.52581e-05	0.000254674	ENSMUSG00000038357|ENSMUSG00000020366|ENSMUSG00000026656|ENSMUSG00000019370|ENSMUSG00000020248|ENSMUSG00000022521|ENSMUSG00000020826|ENSMUSG00000059498|ENSMUSG00000016529|ENSMUSG00000070904|ENSMUSG00000036438|ENSMUSG00000058715|ENSMUSG00000030707|ENSMUSG00000001750|ENSMUSG00000030142|ENSMUSG00000100549|ENSMUSG00000027646|ENSMUSG00000022479|ENSMUSG00000059089|ENSMUSG00000024401|ENSMUSG00000025383|…	http://www.genome.jp/kegg-bin/show_pathway?mmu05152/mmu:11972%09red/mmu:22337%09red/mmu:13033%09red/mmu:271457%09red/mmu:14131%09red/mmu:14130%09red/mmu:16409%09red/mmu:12314%09red/mmu:22034%09red/mmu:11975%09red/mmu:12796%09red/mmu:16193%09red/mmu:21926%09red/mmu:27060%09red/mmu:26415%09red/mmu:26414%09red/mmu:26413%09red/mmu:12315%09red/mmu:11783%09red/mmu:16985%09red/mmu:53970%09red/mmu:13115%…
MAPK signaling pathway	KEGG PATHWAY	mmu04010	65	254	1.57817e-05	0.000261868	ENSMUSG00000024401|ENSMUSG00000020366|ENSMUSG00000071076|ENSMUSG00000054252|ENSMUSG00000020190|ENSMUSG00000027684|ENSMUSG00000028832|ENSMUSG00000020866|ENSMUSG00000025665|ENSMUSG00000016528|ENSMUSG00000002948|ENSMUSG00000052681|ENSMUSG00000010066|ENSMUSG00000031565|ENSMUSG00000033016|ENSMUSG00000059436|ENSMUSG00000018411|ENSMUSG00000017376|ENSMUSG00000030849|ENSMUSG00000031530|ENSMUSG00000015755|…	http://www.genome.jp/kegg-bin/show_pathway?mmu04010/mmu:17260%09red/mmu:17165%09red/mmu:17164%09red/mmu:215449%09red/mmu:14013%09red/mmu:16653%09red/mmu:13714%09red/mmu:22034%09red/mmu:14176%09red/mmu:26400%09red/mmu:17187%09red/mmu:12531%09red/mmu:192176%09red/mmu:102626%09red/mmu:17762%09red/mmu:240168%09red/mmu:19417%09red/mmu:56808%09red/mmu:26415%09red/mmu:26414%09red/mmu:15370%09red/mmu:201…
PI3K-Akt signaling pathway	KEGG PATHWAY	mmu04151	81	341	1.60532e-05	0.000264991	ENSMUSG00000038067|ENSMUSG00000025746|ENSMUSG00000034165|ENSMUSG00000009630|ENSMUSG00000020349|ENSMUSG00000034801|ENSMUSG00000028364|ENSMUSG00000027936|ENSMUSG00000019970|ENSMUSG00000026840|ENSMUSG00000027954|ENSMUSG00000020516|ENSMUSG00000027381|ENSMUSG00000029711|ENSMUSG00000026193|ENSMUSG00000070904|ENSMUSG00000029304|ENSMUSG00000068227|ENSMUSG00000031565|ENSMUSG00000005533|ENSMUSG00000018965|…	http://www.genome.jp/kegg-bin/show_pathway?mmu04151/mmu:17311%09red/mmu:73699%09red/mmu:320207%09red/mmu:71978%09red/mmu:17210%09red/mmu:12575%09red/mmu:16653%09red/mmu:12125%09red/mmu:226849%09red/mmu:269643%09red/mmu:16402%09red/mmu:14176%09red/mmu:15976%09red/mmu:18706%09red/mmu:232493%09red/mmu:15975%09red/mmu:104099%09red/mmu:21923%09red/mmu:109333%09red/mmu:18707%09red/mmu:16193%09red/mmu:7…
Neurotrophin signaling pathway	KEGG PATHWAY	mmu04722	39	123	1.71484e-05	0.000281299	ENSMUSG00000020170|ENSMUSG00000048756|ENSMUSG00000042594|ENSMUSG00000020366|ENSMUSG00000019370|ENSMUSG00000068798|ENSMUSG00000025665|ENSMUSG00000016528|ENSMUSG00000036438|ENSMUSG00000034801|ENSMUSG00000052681|ENSMUSG00000035529|ENSMUSG00000021948|ENSMUSG00000027665|ENSMUSG00000030595|ENSMUSG00000001729|ENSMUSG00000020227|ENSMUSG00000004933|ENSMUSG00000031392|ENSMUSG00000030220|ENSMUSG00000046709|…	http://www.genome.jp/kegg-bin/show_pathway?mmu04722/mmu:16653%09red/mmu:17164%09red/mmu:215449%09red/mmu:12315%09red/mmu:12314%09red/mmu:22034%09red/mmu:72843%09red/mmu:18706%09red/mmu:18707%09red/mmu:18607%09red/mmu:26415%09red/mmu:26414%09red/mmu:26413%09red/mmu:20111%09red/mmu:18213%09red/mmu:320207%09red/mmu:12928%09red/mmu:18036%09red/mmu:17179%09red/mmu:16923%09red/mmu:20663%09red/mmu:20661…
Osteoclast differentiation	KEGG PATHWAY	mmu04380	40	129	2.05922e-05	0.000332073	ENSMUSG00000020366|ENSMUSG00000071076|ENSMUSG00000026656|ENSMUSG00000023964|ENSMUSG00000004508|ENSMUSG00000002948|ENSMUSG00000015837|ENSMUSG00000033016|ENSMUSG00000006519|ENSMUSG00000059498|ENSMUSG00000001847|ENSMUSG00000062593|ENSMUSG00000027665|ENSMUSG00000015755|ENSMUSG00000030579|ENSMUSG00000022015|ENSMUSG00000022971|ENSMUSG00000089942|ENSMUSG00000059089|ENSMUSG00000024401|ENSMUSG00000071715|…	http://www.genome.jp/kegg-bin/show_pathway?mmu04380/mmu:12311%09red/mmu:14131%09red/mmu:14130%09red/mmu:11433%09red/mmu:13038%09red/mmu:22034%09red/mmu:21943%09red/mmu:15976%09red/mmu:18725%09red/mmu:15975%09red/mmu:18706%09red/mmu:18707%09red/mmu:21926%09red/mmu:26400%09red/mmu:26415%09red/mmu:26414%09red/mmu:26413%09red/mmu:68652%09red/mmu:320207%09red/mmu:17972%09red/mmu:13057%09red/mmu:18018%…
mRNA surveillance pathway	KEGG PATHWAY	mmu03015	32	92	2.17526e-05	0.000349174	ENSMUSG00000010097|ENSMUSG00000054582|ENSMUSG00000020349|ENSMUSG00000009630|ENSMUSG00000030655|ENSMUSG00000034681|ENSMUSG00000058301|ENSMUSG00000025134|ENSMUSG00000043241|ENSMUSG00000022194|ENSMUSG00000029625|ENSMUSG00000029120|ENSMUSG00000022052|ENSMUSG00000032058|ENSMUSG00000028809|ENSMUSG00000024400|ENSMUSG00000022774|ENSMUSG00000009535|ENSMUSG00000069565|ENSMUSG00000031256|ENSMUSG00000020994|…	http://www.genome.jp/kegg-bin/show_pathway?mmu03015/mmu:53319%09red/mmu:73699%09red/mmu:71978%09red/mmu:17149%09red/mmu:70248%09red/mmu:74320%09red/mmu:19047%09red/mmu:192170%09red/mmu:108062%09red/mmu:269643%09red/mmu:233789%09red/mmu:326622%09red/mmu:19704%09red/mmu:74737%09red/mmu:54188%09red/mmu:51796%09red/mmu:19053%09red/mmu:19052%09red/mmu:225363%09red/mmu:226849%09red/mmu:18789%09red/mmu:…
Signaling pathways regulating pluripotency of stem cells	KEGG PATHWAY	mmu04550	42	140	2.48263e-05	0.000391911	ENSMUSG00000021756|ENSMUSG00000003032|ENSMUSG00000029249|ENSMUSG00000024182|ENSMUSG00000045005|ENSMUSG00000005533|ENSMUSG00000027660|ENSMUSG00000030849|ENSMUSG00000027840|ENSMUSG00000024515|ENSMUSG00000031565|ENSMUSG00000049551|ENSMUSG00000000532|ENSMUSG00000031681|ENSMUSG00000031805|ENSMUSG00000042745|ENSMUSG00000005320|ENSMUSG00000024563|ENSMUSG00000027358|ENSMUSG00000020160|ENSMUSG00000030265|…	http://www.genome.jp/kegg-bin/show_pathway?mmu04550/mmu:16653%09red/mmu:13544%09red/mmu:11479%09red/mmu:12167%09red/mmu:18706%09red/mmu:18707%09red/mmu:12005%09red/mmu:16195%09red/mmu:14184%09red/mmu:26415%09red/mmu:26413%09red/mmu:14182%09red/mmu:14183%09red/mmu:320207%09red/mmu:14367%09red/mmu:76073%09red/mmu:19712%09red/mmu:16324%09red/mmu:20848%09red/mmu:20482%09red/mmu:16451%09red/mmu:16453%…
Toll-like receptor signaling pathway	KEGG PATHWAY	mmu04620	34	102	2.51576e-05	0.000395949	ENSMUSG00000029417|ENSMUSG00000029304|ENSMUSG00000020366|ENSMUSG00000003184|ENSMUSG00000002948|ENSMUSG00000070904|ENSMUSG00000001847|ENSMUSG00000027665|ENSMUSG00000100549|ENSMUSG00000042349|ENSMUSG00000022971|ENSMUSG00000020115|ENSMUSG00000024401|ENSMUSG00000075122|ENSMUSG00000031392|ENSMUSG00000046709|ENSMUSG00000021277|ENSMUSG00000025746|ENSMUSG00000021250|ENSMUSG00000051498|ENSMUSG00000063358|…	http://www.genome.jp/kegg-bin/show_pathway?mmu04620/mmu:22031%09red/mmu:13038%09red/mmu:22034%09red/mmu:15976%09red/mmu:12519%09red/mmu:15975%09red/mmu:18706%09red/mmu:18707%09red/mmu:16193%09red/mmu:21926%09red/mmu:26415%09red/mmu:26414%09red/mmu:26413%09red/mmu:68652%09red/mmu:320207%09red/mmu:20303%09red/mmu:54131%09red/mmu:17329%09red/mmu:21899%09red/mmu:14281%09red/mmu:15964%09red/mmu:15967%…
Hepatitis C	KEGG PATHWAY	mmu05160	40	136	5.50509e-05	0.000816187	ENSMUSG00000079339|ENSMUSG00000020366|ENSMUSG00000020349|ENSMUSG00000023906|ENSMUSG00000066720|ENSMUSG00000003184|ENSMUSG00000009630|ENSMUSG00000070904|ENSMUSG00000034801|ENSMUSG00000047230|ENSMUSG00000029120|ENSMUSG00000100549|ENSMUSG00000022052|ENSMUSG00000032405|ENSMUSG00000042349|ENSMUSG00000032058|ENSMUSG00000037936|ENSMUSG00000022971|ENSMUSG00000020115|ENSMUSG00000024401|ENSMUSG00000046709|…	http://www.genome.jp/kegg-bin/show_pathway?mmu05160/mmu:16653%09red/mmu:73699%09red/mmu:16835%09red/mmu:71978%09red/mmu:56863%09red/mmu:22031%09red/mmu:22034%09red/mmu:15976%09red/mmu:15975%09red/mmu:20778%09red/mmu:269643%09red/mmu:18706%09red/mmu:18707%09red/mmu:21926%09red/mmu:18607%09red/mmu:12738%09red/mmu:26415%09red/mmu:26414%09red/mmu:26413%09red/mmu:12575%09red/mmu:320207%09red/mmu:54131…
Apoptosis	KEGG PATHWAY	mmu04210	40	138	7.18185e-05	0.00103265	ENSMUSG00000026496|ENSMUSG00000046709|ENSMUSG00000020366|ENSMUSG00000053820|ENSMUSG00000026883|ENSMUSG00000025860|ENSMUSG00000029863|ENSMUSG00000027665|ENSMUSG00000054509|ENSMUSG00000016256|ENSMUSG00000042644|ENSMUSG00000022074|ENSMUSG00000024401|ENSMUSG00000032359|ENSMUSG00000071714|ENSMUSG00000038612|ENSMUSG00000046607|ENSMUSG00000000817|ENSMUSG00000030265|ENSMUSG00000021250|ENSMUSG00000023249|…	http://www.genome.jp/kegg-bin/show_pathway?mmu04210/mmu:16653%09red/mmu:13033%09red/mmu:17210%09red/mmu:13036%09red/mmu:13038%09red/mmu:22035%09red/mmu:12046%09red/mmu:12123%09red/mmu:18706%09red/mmu:18707%09red/mmu:21926%09red/mmu:18607%09red/mmu:235587%09red/mmu:26414%09red/mmu:26413%09red/mmu:11783%09red/mmu:69601%09red/mmu:320207%09red/mmu:13040%09red/mmu:12125%09red/mmu:20740%09red/mmu:14103…
Hippo signaling pathway	KEGG PATHWAY	mmu04390	43	154	8.06804e-05	0.00114473	ENSMUSG00000034165|ENSMUSG00000018965|ENSMUSG00000020349|ENSMUSG00000004455|ENSMUSG00000009630|ENSMUSG00000010067|ENSMUSG00000024182|ENSMUSG00000045005|ENSMUSG00000029053|ENSMUSG00000053110|ENSMUSG00000025162|ENSMUSG00000032058|ENSMUSG00000027840|ENSMUSG00000007613|ENSMUSG00000029120|ENSMUSG00000049551|ENSMUSG00000022052|ENSMUSG00000031681|ENSMUSG00000024985|ENSMUSG00000040021|ENSMUSG00000042745|…	http://www.genome.jp/kegg-bin/show_pathway?mmu04390/mmu:73699%09red/mmu:16798%09red/mmu:71978%09red/mmu:269643%09red/mmu:13544%09red/mmu:56289%09red/mmu:104318%09red/mmu:12167%09red/mmu:21676%09red/mmu:18762%09red/mmu:12005%09red/mmu:19047%09red/mmu:22631%09red/mmu:22630%09red/mmu:14367%09red/mmu:21416%09red/mmu:58220%09red/mmu:21415%09red/mmu:27373%09red/mmu:19053%09red/mmu:19052%09red/mmu:64010…
Proteoglycans in cancer	KEGG PATHWAY	mmu05205	53	206	8.12679e-05	0.00115115	ENSMUSG00000020170|ENSMUSG00000048583|ENSMUSG00000019254|ENSMUSG00000020516|ENSMUSG00000018166|ENSMUSG00000063358|ENSMUSG00000026193|ENSMUSG00000025351|ENSMUSG00000031565|ENSMUSG00000031714|ENSMUSG00000005533|ENSMUSG00000000555|ENSMUSG00000001847|ENSMUSG00000018486|ENSMUSG00000027665|ENSMUSG00000027840|ENSMUSG00000045005|ENSMUSG00000049551|ENSMUSG00000027646|ENSMUSG00000042644|ENSMUSG00000005034|…	http://www.genome.jp/kegg-bin/show_pathway?mmu05205/mmu:22350%09red/mmu:16653%09red/mmu:320207%09red/mmu:12575%09red/mmu:232807%09red/mmu:12505%09red/mmu:16402%09red/mmu:208650%09red/mmu:12512%09red/mmu:192176%09red/mmu:18706%09red/mmu:18707%09red/mmu:12390%09red/mmu:21926%09red/mmu:18607%09red/mmu:13867%09red/mmu:26415%09red/mmu:26413%09red/mmu:14268%09red/mmu:14182%09red/mmu:18749%09red/mmu:201…
Lysosome	KEGG PATHWAY	mmu04142	37	125	9.20265e-05	0.00128616	ENSMUSG00000007458|ENSMUSG00000021003|ENSMUSG00000028048|ENSMUSG00000031266|ENSMUSG00000025351|ENSMUSG00000035847|ENSMUSG00000024480|ENSMUSG00000010051|ENSMUSG00000004207|ENSMUSG00000016256|ENSMUSG00000018774|ENSMUSG00000009090|ENSMUSG00000038642|ENSMUSG00000032359|ENSMUSG00000025759|ENSMUSG00000028673|ENSMUSG00000002103|ENSMUSG00000001750|ENSMUSG00000024121|ENSMUSG00000068747|ENSMUSG00000033379|…	http://www.genome.jp/kegg-bin/show_pathway?mmu04142/mmu:11972%09red/mmu:11605%09red/mmu:13033%09red/mmu:14420%09red/mmu:11433%09red/mmu:11432%09red/mmu:235504%09red/mmu:74325%09red/mmu:11975%09red/mmu:12512%09red/mmu:12514%09red/mmu:15931%09red/mmu:71665%09red/mmu:52120%09red/mmu:27060%09red/mmu:13036%09red/mmu:18173%09red/mmu:74008%09red/mmu:13040%09red/mmu:19141%09red/mmu:13038%09red/mmu:20661%…
Sphingolipid signaling pathway	KEGG PATHWAY	mmu04071	36	123	0.000136872	0.00183231	ENSMUSG00000020366|ENSMUSG00000020349|ENSMUSG00000050511|ENSMUSG00000004508|ENSMUSG00000009630|ENSMUSG00000058715|ENSMUSG00000029053|ENSMUSG00000021054|ENSMUSG00000001847|ENSMUSG00000027665|ENSMUSG00000040061|ENSMUSG00000032562|ENSMUSG00000029120|ENSMUSG00000022052|ENSMUSG00000032058|ENSMUSG00000024401|ENSMUSG00000020611|ENSMUSG00000046709|ENSMUSG00000024500|ENSMUSG00000030265|ENSMUSG00000027695|…	http://www.genome.jp/kegg-bin/show_pathway?mmu04071/mmu:16653%09red/mmu:13033%09red/mmu:71978%09red/mmu:226849%09red/mmu:13244%09red/mmu:269643%09red/mmu:18706%09red/mmu:18707%09red/mmu:18762%09red/mmu:21926%09red/mmu:18607%09red/mmu:26415%09red/mmu:26414%09red/mmu:18386%09red/mmu:73699%09red/mmu:320207%09red/mmu:19354%09red/mmu:19053%09red/mmu:19052%09red/mmu:14127%09red/mmu:14674%09red/mmu:1467…
Phospholipase D signaling pathway	KEGG PATHWAY	mmu04072	40	144	0.000153574	0.00202232	ENSMUSG00000026825|ENSMUSG00000004508|ENSMUSG00000058715|ENSMUSG00000034801|ENSMUSG00000031714|ENSMUSG00000033335|ENSMUSG00000027665|ENSMUSG00000040061|ENSMUSG00000018008|ENSMUSG00000048376|ENSMUSG00000034731|ENSMUSG00000019966|ENSMUSG00000003269|ENSMUSG00000027523|ENSMUSG00000048480|ENSMUSG00000020611|ENSMUSG00000049044|ENSMUSG00000028019|ENSMUSG00000026812|ENSMUSG00000048076|ENSMUSG00000030265|…	http://www.genome.jp/kegg-bin/show_pathway?mmu04072/mmu:17311%09red/mmu:11840%09red/mmu:16653%09red/mmu:14683%09red/mmu:380921%09red/mmu:13429%09red/mmu:18720%09red/mmu:18706%09red/mmu:18707%09red/mmu:64143%09red/mmu:26413%09red/mmu:227333%09red/mmu:320207%09red/mmu:20130%09red/mmu:56508%09red/mmu:20663%09red/mmu:14127%09red/mmu:14745%09red/mmu:13430%09red/mmu:14674%09red/mmu:72318%09red/mmu:1406…
Insulin signaling pathway	KEGG PATHWAY	mmu04910	39	140	0.000175469	0.00228197	ENSMUSG00000020027|ENSMUSG00000029513|ENSMUSG00000020366|ENSMUSG00000032601|ENSMUSG00000027540|ENSMUSG00000019370|ENSMUSG00000020516|ENSMUSG00000018566|ENSMUSG00000038894|ENSMUSG00000036438|ENSMUSG00000034801|ENSMUSG00000029053|ENSMUSG00000067713|ENSMUSG00000027665|ENSMUSG00000005034|ENSMUSG00000078650|ENSMUSG00000001729|ENSMUSG00000020190|ENSMUSG00000020612|ENSMUSG00000046709|ENSMUSG00000026812|…	http://www.genome.jp/kegg-bin/show_pathway?mmu04910/mmu:16653%09red/mmu:18749%09red/mmu:12315%09red/mmu:12314%09red/mmu:232493%09red/mmu:384783%09red/mmu:18706%09red/mmu:18707%09red/mmu:18762%09red/mmu:104215%09red/mmu:18607%09red/mmu:19246%09red/mmu:26414%09red/mmu:26413%09red/mmu:20528%09red/mmu:320207%09red/mmu:12928%09red/mmu:216233%09red/mmu:20663%09red/mmu:17347%09red/mmu:106628%09red/mmu:1…
Tight junction	KEGG PATHWAY	mmu04530	39	140	0.000175469	0.00228197	ENSMUSG00000066720|ENSMUSG00000020349|ENSMUSG00000023906|ENSMUSG00000068876|ENSMUSG00000009630|ENSMUSG00000024812|ENSMUSG00000022052|ENSMUSG00000029053|ENSMUSG00000021948|ENSMUSG00000047230|ENSMUSG00000032562|ENSMUSG00000029120|ENSMUSG00000024091|ENSMUSG00000045095|ENSMUSG00000027646|ENSMUSG00000032058|ENSMUSG00000030265|ENSMUSG00000026778|ENSMUSG00000021108|ENSMUSG00000001729|ENSMUSG00000025812|…	http://www.genome.jp/kegg-bin/show_pathway?mmu04530/mmu:16653%09red/mmu:73699%09red/mmu:71978%09red/mmu:56863%09red/mmu:93742%09red/mmu:269643%09red/mmu:18761%09red/mmu:18762%09red/mmu:12739%09red/mmu:12738%09red/mmu:208431%09red/mmu:30960%09red/mmu:20130%09red/mmu:58220%09red/mmu:70737%09red/mmu:19053%09red/mmu:19052%09red/mmu:13000%09red/mmu:13001%09red/mmu:14678%09red/mmu:71960%09red/mmu:14924…
HIF-1 signaling pathway	KEGG PATHWAY	mmu04066	32	106	0.000197403	0.00252956	ENSMUSG00000020190|ENSMUSG00000062070|ENSMUSG00000020516|ENSMUSG00000021367|ENSMUSG00000033688|ENSMUSG00000030695|ENSMUSG00000029711|ENSMUSG00000020826|ENSMUSG00000005533|ENSMUSG00000028645|ENSMUSG00000063229|ENSMUSG00000027665|ENSMUSG00000029648|ENSMUSG00000055839|ENSMUSG00000001131|ENSMUSG00000001729|ENSMUSG00000026773|ENSMUSG00000063358|ENSMUSG00000063524|ENSMUSG00000058709|ENSMUSG00000039936|…	http://www.genome.jp/kegg-bin/show_pathway?mmu04066/mmu:12575%09red/mmu:15368%09red/mmu:67673%09red/mmu:18706%09red/mmu:18707%09red/mmu:16193%09red/mmu:20525%09red/mmu:13806%09red/mmu:13614%09red/mmu:320207%09red/mmu:20848%09red/mmu:14433%09red/mmu:17347%09red/mmu:112407%09red/mmu:112406%09red/mmu:15980%09red/mmu:16001%09red/mmu:18655%09red/mmu:11674%09red/mmu:11651%09red/mmu:170768%09red/mmu:264…
Chemokine signaling pathway	KEGG PATHWAY	mmu04062	49	194	0.000213134	0.00270468	ENSMUSG00000029417|ENSMUSG00000033220|ENSMUSG00000068798|ENSMUSG00000052681|ENSMUSG00000034801|ENSMUSG00000029053|ENSMUSG00000021948|ENSMUSG00000071658|ENSMUSG00000027665|ENSMUSG00000040061|ENSMUSG00000032562|ENSMUSG00000018920|ENSMUSG00000061353|ENSMUSG00000023078|ENSMUSG00000027646|ENSMUSG00000031805|ENSMUSG00000026166|ENSMUSG00000005034|ENSMUSG00000030595|ENSMUSG00000001729|ENSMUSG00000048480|…	http://www.genome.jp/kegg-bin/show_pathway?mmu04062/mmu:16653%09red/mmu:320207%09red/mmu:215449%09red/mmu:18706%09red/mmu:18707%09red/mmu:18762%09red/mmu:26413%09red/mmu:100042493%09red/mmu:18749%09red/mmu:12928%09red/mmu:20303%09red/mmu:18036%09red/mmu:14702%09red/mmu:19303%09red/mmu:20302%09red/mmu:66102%09red/mmu:20848%09red/mmu:20315%09red/mmu:20663%09red/mmu:14678%09red/mmu:16453%09red/mmu:1…
Rap1 signaling pathway	KEGG PATHWAY	mmu04015	53	216	0.000222317	0.00280425	ENSMUSG00000024070|ENSMUSG00000019370|ENSMUSG00000031603|ENSMUSG00000027954|ENSMUSG00000068798|ENSMUSG00000036438|ENSMUSG00000031565|ENSMUSG00000052681|ENSMUSG00000005533|ENSMUSG00000029053|ENSMUSG00000029648|ENSMUSG00000001847|ENSMUSG00000030849|ENSMUSG00000040061|ENSMUSG00000032562|ENSMUSG00000052698|ENSMUSG00000027646|ENSMUSG00000030265|ENSMUSG00000048376|ENSMUSG00000019966|ENSMUSG00000042745|…	http://www.genome.jp/kegg-bin/show_pathway?mmu04015/mmu:16653%09red/mmu:17311%09red/mmu:12315%09red/mmu:14293%09red/mmu:215449%09red/mmu:16409%09red/mmu:12314%09red/mmu:14683%09red/mmu:14176%09red/mmu:18798%09red/mmu:18706%09red/mmu:18707%09red/mmu:18762%09red/mmu:64143%09red/mmu:75292%09red/mmu:14184%09red/mmu:26415%09red/mmu:26413%09red/mmu:13636%09red/mmu:14182%09red/mmu:14183%09red/mmu:240168…
Ras signaling pathway	KEGG PATHWAY	mmu04014	55	228	0.000246261	0.00306205	ENSMUSG00000020366|ENSMUSG00000019370|ENSMUSG00000031603|ENSMUSG00000026596|ENSMUSG00000027954|ENSMUSG00000004508|ENSMUSG00000068798|ENSMUSG00000036402|ENSMUSG00000036438|ENSMUSG00000024798|ENSMUSG00000010067|ENSMUSG00000005533|ENSMUSG00000001847|ENSMUSG00000071658|ENSMUSG00000030849|ENSMUSG00000000817|ENSMUSG00000041193|ENSMUSG00000031565|ENSMUSG00000029648|ENSMUSG00000074923|ENSMUSG00000005034|…	http://www.genome.jp/kegg-bin/show_pathway?mmu04014/mmu:16653%09red/mmu:17311%09red/mmu:271457%09red/mmu:215449%09red/mmu:12315%09red/mmu:12314%09red/mmu:14176%09red/mmu:56289%09red/mmu:18706%09red/mmu:18707%09red/mmu:19417%09red/mmu:64143%09red/mmu:54153%09red/mmu:14186%09red/mmu:26414%09red/mmu:26413%09red/mmu:13636%09red/mmu:14182%09red/mmu:14183%09red/mmu:240168%09red/mmu:320207%09red/mmu:187…
Pertussis	KEGG PATHWAY	mmu05133	25	75	0.000281512	0.00341134	ENSMUSG00000020366|ENSMUSG00000019370|ENSMUSG00000030793|ENSMUSG00000020826|ENSMUSG00000016529|ENSMUSG00000036887|ENSMUSG00000036438|ENSMUSG00000000555|ENSMUSG00000032562|ENSMUSG00000003184|ENSMUSG00000024401|ENSMUSG00000036905|ENSMUSG00000031392|ENSMUSG00000046709|ENSMUSG00000024164|ENSMUSG00000030786|ENSMUSG00000021250|ENSMUSG00000063358|ENSMUSG00000027398|ENSMUSG00000036896|ENSMUSG00000025383|…	http://www.genome.jp/kegg-bin/show_pathway?mmu05133/mmu:12315%09red/mmu:12314%09red/mmu:16402%09red/mmu:16193%09red/mmu:12259%09red/mmu:21926%09red/mmu:66824%09red/mmu:26415%09red/mmu:26414%09red/mmu:26413%09red/mmu:16409%09red/mmu:54131%09red/mmu:317677%09red/mmu:14678%09red/mmu:14281%09red/mmu:22034%09red/mmu:12266%09red/mmu:12262%09red/mmu:12260%09red/mmu:83430%09red/mmu:26420%09red/mmu:18126%…
Pathways in cancer	KEGG PATHWAY	mmu05200	83	393	0.000377258	0.00439868	ENSMUSG00000024563|ENSMUSG00000020366|ENSMUSG00000033220|ENSMUSG00000037992|ENSMUSG00000023067|ENSMUSG00000026193|ENSMUSG00000026840|ENSMUSG00000022521|ENSMUSG00000089989|ENSMUSG00000030110|ENSMUSG00000020826|ENSMUSG00000035105|ENSMUSG00000010067|ENSMUSG00000024182|ENSMUSG00000031565|ENSMUSG00000005533|ENSMUSG00000028645|ENSMUSG00000024985|ENSMUSG00000001847|ENSMUSG00000071658|ENSMUSG00000030849|…	http://www.genome.jp/kegg-bin/show_pathway?mmu05200/mmu:17311%09red/mmu:320207%09red/mmu:14013%09red/mmu:14062%09red/mmu:16653%09red/mmu:22031%09red/mmu:12579%09red/mmu:17187%09red/mmu:66197%09red/mmu:14256%09red/mmu:14176%09red/mmu:208650%09red/mmu:112406%09red/mmu:12061%09red/mmu:18798%09red/mmu:12575%09red/mmu:18706%09red/mmu:18707%09red/mmu:12005%09red/mmu:240168%09red/mmu:16193%09red/mmu:171…
Herpes simplex infection	KEGG PATHWAY	mmu05168	50	206	0.000406588	0.00467308	ENSMUSG00000079339|ENSMUSG00000020366|ENSMUSG00000031386|ENSMUSG00000005198|ENSMUSG00000022521|ENSMUSG00000042333|ENSMUSG00000042349|ENSMUSG00000070904|ENSMUSG00000005824|ENSMUSG00000025134|ENSMUSG00000015755|ENSMUSG00000100549|ENSMUSG00000022710|ENSMUSG00000010097|ENSMUSG00000024097|ENSMUSG00000091705|ENSMUSG00000062300|ENSMUSG00000022971|ENSMUSG00000026222|ENSMUSG00000030595|ENSMUSG00000020115|…	http://www.genome.jp/kegg-bin/show_pathway?mmu05168/mmu:53319%09red/mmu:20815%09red/mmu:252870%09red/mmu:22031%09red/mmu:230979%09red/mmu:19294%09red/mmu:22034%09red/mmu:15976%09red/mmu:15975%09red/mmu:15013%09red/mmu:16193%09red/mmu:21926%09red/mmu:110809%09red/mmu:67615%09red/mmu:54131%09red/mmu:26414%09red/mmu:18626%09red/mmu:68652%09red/mmu:18036%09red/mmu:21374%09red/mmu:20020%09red/mmu:2696…
AGE-RAGE signaling pathway in diabetic complications	KEGG PATHWAY	mmu04933	30	102	0.000442158	0.00503224	ENSMUSG00000020366|ENSMUSG00000021367|ENSMUSG00000026193|ENSMUSG00000033016|ENSMUSG00000029053|ENSMUSG00000037405|ENSMUSG00000021948|ENSMUSG00000027665|ENSMUSG00000040061|ENSMUSG00000024515|ENSMUSG00000020937|ENSMUSG00000024401|ENSMUSG00000046709|ENSMUSG00000030265|ENSMUSG00000001847|ENSMUSG00000063358|ENSMUSG00000039936|ENSMUSG00000001729|ENSMUSG00000027398|ENSMUSG00000039943|ENSMUSG00000020901|…	http://www.genome.jp/kegg-bin/show_pathway?mmu04933/mmu:16653%09red/mmu:72469%09red/mmu:18706%09red/mmu:18707%09red/mmu:18762%09red/mmu:21926%09red/mmu:16193%09red/mmu:26415%09red/mmu:26414%09red/mmu:26413%09red/mmu:14268%09red/mmu:13614%09red/mmu:320207%09red/mmu:20848%09red/mmu:18018%09red/mmu:17126%09red/mmu:74055%09red/mmu:13367%09red/mmu:14066%09red/mmu:26420%09red/mmu:11651%09red/mmu:21812%…
Cytokine-cytokine receptor interaction	KEGG PATHWAY	mmu04060	60	264	0.000499525	0.00560002	ENSMUSG00000038067|ENSMUSG00000025746|ENSMUSG00000029417|ENSMUSG00000021756|ENSMUSG00000040329|ENSMUSG00000009185|ENSMUSG00000023078|ENSMUSG00000059327|ENSMUSG00000042333|ENSMUSG00000029711|ENSMUSG00000016529|ENSMUSG00000070904|ENSMUSG00000022971|ENSMUSG00000016524|ENSMUSG00000005824|ENSMUSG00000052430|ENSMUSG00000044337|ENSMUSG00000052336|ENSMUSG00000061353|ENSMUSG00000100549|ENSMUSG00000000532|…	http://www.genome.jp/kegg-bin/show_pathway?mmu04060/mmu:17311%09red/mmu:230979%09red/mmu:22035%09red/mmu:21941%09red/mmu:21943%09red/mmu:15976%09red/mmu:21812%09red/mmu:15975%09red/mmu:11479%09red/mmu:12167%09red/mmu:16193%09red/mmu:21926%09red/mmu:21933%09red/mmu:16196%09red/mmu:27279%09red/mmu:100042493%09red/mmu:16195%09red/mmu:20303%09red/mmu:50929%09red/mmu:14600%09red/mmu:12803%09red/mmu:66…
mTOR signaling pathway	KEGG PATHWAY	mmu04150	40	155	0.000540434	0.00596926	ENSMUSG00000006269|ENSMUSG00000050310|ENSMUSG00000020516|ENSMUSG00000019210|ENSMUSG00000045005|ENSMUSG00000005533|ENSMUSG00000018486|ENSMUSG00000027665|ENSMUSG00000027840|ENSMUSG00000036707|ENSMUSG00000028646|ENSMUSG00000049551|ENSMUSG00000049550|ENSMUSG00000030842|ENSMUSG00000061175|ENSMUSG00000050288|ENSMUSG00000024401|ENSMUSG00000026812|ENSMUSG00000030265|ENSMUSG00000010095|ENSMUSG00000024122|…	http://www.genome.jp/kegg-bin/show_pathway?mmu04150/mmu:11973%09red/mmu:11651%09red/mmu:16653%09red/mmu:13544%09red/mmu:18706%09red/mmu:18707%09red/mmu:21926%09red/mmu:18607%09red/mmu:26413%09red/mmu:20111%09red/mmu:329679%09red/mmu:320207%09red/mmu:54170%09red/mmu:56430%09red/mmu:14367%09red/mmu:56716%09red/mmu:20663%09red/mmu:20869%09red/mmu:11964%09red/mmu:67071%09red/mmu:22412%09red/mmu:20393…
Viral carcinogenesis	KEGG PATHWAY	mmu05203	53	226	0.00055631	0.00612525	ENSMUSG00000034165|ENSMUSG00000018965|ENSMUSG00000022521|ENSMUSG00000031666|ENSMUSG00000031585|ENSMUSG00000003184|ENSMUSG00000016528|ENSMUSG00000021756|ENSMUSG00000026313|ENSMUSG00000001847|ENSMUSG00000027665|ENSMUSG00000027641|ENSMUSG00000019942|ENSMUSG00000027646|ENSMUSG00000091705|ENSMUSG00000031805|ENSMUSG00000017007|ENSMUSG00000037868|ENSMUSG00000032413|ENSMUSG00000005034|ENSMUSG00000004698|…	http://www.genome.jp/kegg-bin/show_pathway?mmu05203/mmu:11972%09red/mmu:252870%09red/mmu:18749%09red/mmu:12575%09red/mmu:16653%09red/mmu:22031%09red/mmu:12579%09red/mmu:13205%09red/mmu:20684%09red/mmu:17164%09red/mmu:18707%09red/mmu:18706%09red/mmu:79221%09red/mmu:14997%09red/mmu:13194%09red/mmu:26413%09red/mmu:16195%09red/mmu:22631%09red/mmu:22630%09red/mmu:15013%09red/mmu:21374%09red/mmu:54131%…
Jak-STAT signaling pathway	KEGG PATHWAY	mmu04630	41	161	0.000581101	0.00633829	ENSMUSG00000038067|ENSMUSG00000020027|ENSMUSG00000034165|ENSMUSG00000023092|ENSMUSG00000021756|ENSMUSG00000040329|ENSMUSG00000079415|ENSMUSG00000022521|ENSMUSG00000029711|ENSMUSG00000016529|ENSMUSG00000070904|ENSMUSG00000016524|ENSMUSG00000031805|ENSMUSG00000034801|ENSMUSG00000027665|ENSMUSG00000100549|ENSMUSG00000068227|ENSMUSG00000037157|ENSMUSG00000032405|ENSMUSG00000022971|ENSMUSG00000025423|…	http://www.genome.jp/kegg-bin/show_pathway?mmu04630/mmu:17210%09red/mmu:12575%09red/mmu:192157%09red/mmu:15976%09red/mmu:15975%09red/mmu:71872%09red/mmu:18706%09red/mmu:18707%09red/mmu:16193%09red/mmu:16195%09red/mmu:16196%09red/mmu:320207%09red/mmu:50929%09red/mmu:12803%09red/mmu:20848%09red/mmu:329244%09red/mmu:216233%09red/mmu:20663%09red/mmu:16451%09red/mmu:16453%09red/mmu:12445%09red/mmu:129…
Adherens junction	KEGG PATHWAY	mmu04520	24	75	0.000598107	0.00651024	ENSMUSG00000027540|ENSMUSG00000022521|ENSMUSG00000006411|ENSMUSG00000031565|ENSMUSG00000005533|ENSMUSG00000017376|ENSMUSG00000024515|ENSMUSG00000027646|ENSMUSG00000025006|ENSMUSG00000024985|ENSMUSG00000062300|ENSMUSG00000025812|ENSMUSG00000024387|ENSMUSG00000046707|ENSMUSG00000001847|ENSMUSG00000063358|ENSMUSG00000055799|ENSMUSG00000068036|ENSMUSG00000022656|ENSMUSG00000033060|ENSMUSG00000033220|…	http://www.genome.jp/kegg-bin/show_pathway?mmu04520/mmu:380928%09red/mmu:19294%09red/mmu:58998%09red/mmu:19246%09red/mmu:26413%09red/mmu:14182%09red/mmu:21416%09red/mmu:21415%09red/mmu:13000%09red/mmu:13001%09red/mmu:18099%09red/mmu:16001%09red/mmu:21812%09red/mmu:93742%09red/mmu:20411%09red/mmu:13649%09red/mmu:12914%09red/mmu:19354%09red/mmu:19353%09red/mmu:71740%09red/mmu:17126%09red/mmu:20779%…
Spliceosome	KEGG PATHWAY	mmu03040	35	131	0.000692818	0.00738771	ENSMUSG00000059208|ENSMUSG00000030216|ENSMUSG00000018379|ENSMUSG00000059005|ENSMUSG00000060288|ENSMUSG00000025134|ENSMUSG00000020850|ENSMUSG00000010608|ENSMUSG00000024097|ENSMUSG00000061136|ENSMUSG00000032407|ENSMUSG00000025024|ENSMUSG00000024422|ENSMUSG00000002129|ENSMUSG00000001158|ENSMUSG00000022774|ENSMUSG00000031848|ENSMUSG00000020705|ENSMUSG00000021134|ENSMUSG00000031134|ENSMUSG00000056305|…	http://www.genome.jp/kegg-bin/show_pathway?mmu03040/mmu:192159%09red/mmu:17149%09red/mmu:319322%09red/mmu:68879%09red/mmu:76479%09red/mmu:192170%09red/mmu:72047%09red/mmu:20384%09red/mmu:66618%09red/mmu:110809%09red/mmu:108121%09red/mmu:23983%09red/mmu:66101%09red/mmu:76938%09red/mmu:14105%09red/mmu:19655%09red/mmu:76936%09red/mmu:67039%09red/mmu:28035%09red/mmu:229279%09red/mmu:50783%09red/mmu:6…
Fc epsilon RI signaling pathway	KEGG PATHWAY	mmu04664	22	67	0.000749124	0.00784836	ENSMUSG00000020366|ENSMUSG00000004508|ENSMUSG00000058715|ENSMUSG00000034801|ENSMUSG00000001847|ENSMUSG00000027665|ENSMUSG00000026288|ENSMUSG00000024401|ENSMUSG00000046709|ENSMUSG00000034116|ENSMUSG00000030265|ENSMUSG00000024122|ENSMUSG00000063358|ENSMUSG00000039936|ENSMUSG00000001729|ENSMUSG00000002948|ENSMUSG00000020901|ENSMUSG00000025499|ENSMUSG00000004864|ENSMUSG00000033220|ENSMUSG00000035027|…	http://www.genome.jp/kegg-bin/show_pathway?mmu04664/mmu:16653%09red/mmu:14127%09red/mmu:16331%09red/mmu:18706%09red/mmu:18707%09red/mmu:21926%09red/mmu:18607%09red/mmu:26415%09red/mmu:26414%09red/mmu:26413%09red/mmu:320207%09red/mmu:20663%09red/mmu:22324%09red/mmu:14389%09red/mmu:11651%09red/mmu:26400%09red/mmu:26420%09red/mmu:26396%09red/mmu:26397%09red/mmu:19354%09red/mmu:19353%09red/mmu:15461%…
cAMP signaling pathway	KEGG PATHWAY	mmu04024	47	197	0.000812402	0.00838149	ENSMUSG00000020366|ENSMUSG00000045502|ENSMUSG00000029778|ENSMUSG00000019370|ENSMUSG00000003123|ENSMUSG00000049241|ENSMUSG00000021478|ENSMUSG00000022521|ENSMUSG00000068798|ENSMUSG00000036438|ENSMUSG00000033016|ENSMUSG00000028525|ENSMUSG00000027665|ENSMUSG00000032562|ENSMUSG00000027523|ENSMUSG00000048376|ENSMUSG00000005034|ENSMUSG00000049044|ENSMUSG00000052681|ENSMUSG00000032177|ENSMUSG00000007107|…	http://www.genome.jp/kegg-bin/show_pathway?mmu04024/mmu:18749%09red/mmu:215449%09red/mmu:12315%09red/mmu:12314%09red/mmu:14683%09red/mmu:11517%09red/mmu:18706%09red/mmu:320207%09red/mmu:67821%09red/mmu:26414%09red/mmu:26413%09red/mmu:27222%09red/mmu:19047%09red/mmu:109648%09red/mmu:20130%09red/mmu:239273%09red/mmu:56508%09red/mmu:11928%09red/mmu:18018%09red/mmu:16890%09red/mmu:109905%09red/mmu:56…
Wnt signaling pathway	KEGG PATHWAY	mmu04310	37	143	0.000819324	0.00844459	ENSMUSG00000042988|ENSMUSG00000020366|ENSMUSG00000040260|ENSMUSG00000022521|ENSMUSG00000034165|ENSMUSG00000024182|ENSMUSG00000045005|ENSMUSG00000033016|ENSMUSG00000027840|ENSMUSG00000017376|ENSMUSG00000040061|ENSMUSG00000024515|ENSMUSG00000049551|ENSMUSG00000024985|ENSMUSG00000005034|ENSMUSG00000022855|ENSMUSG00000036840|ENSMUSG00000046709|ENSMUSG00000029686|ENSMUSG00000024387|ENSMUSG00000046707|…	http://www.genome.jp/kegg-bin/show_pathway?mmu04310/mmu:13544%09red/mmu:93960%09red/mmu:319478%09red/mmu:12005%09red/mmu:75826%09red/mmu:26414%09red/mmu:18749%09red/mmu:76441%09red/mmu:14367%09red/mmu:21416%09red/mmu:26965%09red/mmu:21415%09red/mmu:19354%09red/mmu:20317%09red/mmu:72293%09red/mmu:13000%09red/mmu:13001%09red/mmu:18018%09red/mmu:56505%09red/mmu:18099%09red/mmu:22412%09red/mmu:22411%…
Salmonella infection	KEGG PATHWAY	mmu05132	24	78	0.000942328	0.00952505	ENSMUSG00000020366|ENSMUSG00000006304|ENSMUSG00000030793|ENSMUSG00000047193|ENSMUSG00000020826|ENSMUSG00000001847|ENSMUSG00000028917|ENSMUSG00000004591|ENSMUSG00000038195|ENSMUSG00000021288|ENSMUSG00000046709|ENSMUSG00000029465|ENSMUSG00000021250|ENSMUSG00000063358|ENSMUSG00000029379|ENSMUSG00000027398|ENSMUSG00000000982|ENSMUSG00000031328|ENSMUSG00000029380|ENSMUSG00000004864|ENSMUSG00000022965|…	http://www.genome.jp/kegg-bin/show_pathway?mmu05132/mmu:192176%09red/mmu:109333%09red/mmu:69582%09red/mmu:16193%09red/mmu:66824%09red/mmu:26415%09red/mmu:26414%09red/mmu:26413%09red/mmu:280408%09red/mmu:16593%09red/mmu:20302%09red/mmu:14825%09red/mmu:15980%09red/mmu:330122%09red/mmu:14281%09red/mmu:19349%09red/mmu:26420%09red/mmu:110350%09red/mmu:19353%09red/mmu:56378%09red/mmu:20303%09red/mmu:76…
Leishmaniasis	KEGG PATHWAY	mmu05140	21	65	0.00115621	0.0112949	ENSMUSG00000028530|ENSMUSG00000031392|ENSMUSG00000059498|ENSMUSG00000015950|ENSMUSG00000024401|ENSMUSG00000024164|ENSMUSG00000030786|ENSMUSG00000059089|ENSMUSG00000021250|ENSMUSG00000047945|ENSMUSG00000063358|ENSMUSG00000027164|ENSMUSG00000004864|ENSMUSG00000015755|ENSMUSG00000022965|ENSMUSG00000030595|ENSMUSG00000016529|ENSMUSG00000020826|ENSMUSG00000027398|ENSMUSG00000006519|ENSMUSG00000071715	http://www.genome.jp/kegg-bin/show_pathway?mmu05140/mmu:14281%09red/mmu:26415%09red/mmu:26413%09red/mmu:16409%09red/mmu:15980%09red/mmu:68652%09red/mmu:22034%09red/mmu:18036%09red/mmu:18126%09red/mmu:12266%09red/mmu:17972%09red/mmu:13057%09red/mmu:246256%09red/mmu:17969%09red/mmu:14131%09red/mmu:16179%09red/mmu:17357%09red/mmu:21926%09red/mmu:16451%09red/mmu:16153%09red/mmu:16176%09red
Insulin resistance	KEGG PATHWAY	mmu04931	30	110	0.00122589	0.0117672	ENSMUSG00000029513|ENSMUSG00000020366|ENSMUSG00000033871|ENSMUSG00000027540|ENSMUSG00000027936|ENSMUSG00000020516|ENSMUSG00000018566|ENSMUSG00000038894|ENSMUSG00000028645|ENSMUSG00000021948|ENSMUSG00000027665|ENSMUSG00000025220|ENSMUSG00000026778|ENSMUSG00000078650|ENSMUSG00000024401|ENSMUSG00000029053|ENSMUSG00000046709|ENSMUSG00000067713|ENSMUSG00000024122|ENSMUSG00000030244|ENSMUSG00000039936|…	http://www.genome.jp/kegg-bin/show_pathway?mmu04931/mmu:232493%09red/mmu:384783%09red/mmu:18761%09red/mmu:18706%09red/mmu:18707%09red/mmu:18762%09red/mmu:21926%09red/mmu:16193%09red/mmu:18607%09red/mmu:19246%09red/mmu:26414%09red/mmu:20525%09red/mmu:20111%09red/mmu:20528%09red/mmu:320207%09red/mmu:20848%09red/mmu:76055%09red/mmu:67071%09red/mmu:19079%09red/mmu:26420%09red/mmu:11651%09red/mmu:2226…
Ubiquitin mediated proteolysis	KEGG PATHWAY	mmu04120	35	137	0.00134052	0.0126589	ENSMUSG00000034343|ENSMUSG00000066149|ENSMUSG00000029472|ENSMUSG00000020794|ENSMUSG00000029203|ENSMUSG00000023286|ENSMUSG00000019944|ENSMUSG00000004364|ENSMUSG00000055839|ENSMUSG00000015120|ENSMUSG00000032405|ENSMUSG00000025423|ENSMUSG00000022771|ENSMUSG00000037487|ENSMUSG00000024740|ENSMUSG00000039159|ENSMUSG00000025860|ENSMUSG00000029686|ENSMUSG00000027598|ENSMUSG00000091896|ENSMUSG00000028277|…	http://www.genome.jp/kegg-bin/show_pathway?mmu04120/mmu:16396%09red/mmu:72584%09red/mmu:76980%09red/mmu:22034%09red/mmu:67673%09red/mmu:208650%09red/mmu:67921%09red/mmu:26554%09red/mmu:13194%09red/mmu:67615%09red/mmu:14897%09red/mmu:56228%09red/mmu:22214%09red/mmu:140499%09red/mmu:26965%09red/mmu:66105%09red/mmu:22196%09red/mmu:22209%09red/mmu:17344%09red/mmu:106052%09red/mmu:70790%09red/mmu:5332…
AMPK signaling pathway	KEGG PATHWAY	mmu04152	33	127	0.00143064	0.0133534	ENSMUSG00000029513|ENSMUSG00000038894|ENSMUSG00000020349|ENSMUSG00000027936|ENSMUSG00000020516|ENSMUSG00000018566|ENSMUSG00000009630|ENSMUSG00000005533|ENSMUSG00000067713|ENSMUSG00000027665|ENSMUSG00000036707|ENSMUSG00000029120|ENSMUSG00000022052|ENSMUSG00000032058|ENSMUSG00000022878|ENSMUSG00000078650|ENSMUSG00000001729|ENSMUSG00000020671|ENSMUSG00000026773|ENSMUSG00000048756|ENSMUSG00000026812|…	http://www.genome.jp/kegg-bin/show_pathway?mmu04152/mmu:73699%09red/mmu:71978%09red/mmu:226849%09red/mmu:269643%09red/mmu:232493%09red/mmu:18640%09red/mmu:384783%09red/mmu:18707%09red/mmu:18706%09red/mmu:11450%09red/mmu:18607%09red/mmu:19079%09red/mmu:20528%09red/mmu:320207%09red/mmu:19325%09red/mmu:19053%09red/mmu:19052%09red/mmu:74343%09red/mmu:16890%09red/mmu:20869%09red/mmu:15568%09red/mmu:16…
EGFR tyrosine kinase inhibitor resistance	KEGG PATHWAY	mmu01521	24	81	0.00144605	0.0134494	ENSMUSG00000020516|ENSMUSG00000027381|ENSMUSG00000031714|ENSMUSG00000034801|ENSMUSG00000005533|ENSMUSG00000030849|ENSMUSG00000027646|ENSMUSG00000018166|ENSMUSG00000001729|ENSMUSG00000048756|ENSMUSG00000030265|ENSMUSG00000063358|ENSMUSG00000039936|ENSMUSG00000027665|ENSMUSG00000028019|ENSMUSG00000028530|ENSMUSG00000020901|ENSMUSG00000025499|ENSMUSG00000004040|ENSMUSG00000054252|ENSMUSG00000062991|…	http://www.genome.jp/kegg-bin/show_pathway?mmu01521/mmu:16653%09red/mmu:12125%09red/mmu:18706%09red/mmu:18707%09red/mmu:16193%09red/mmu:14184%09red/mmu:13867%09red/mmu:26413%09red/mmu:14183%09red/mmu:320207%09red/mmu:20848%09red/mmu:20663%09red/mmu:16451%09red/mmu:16001%09red/mmu:14388%09red/mmu:11651%09red/mmu:211323%09red/mmu:26396%09red/mmu:54635%09red/mmu:20779%09red/mmu:13649%09red/mmu:72508…
Fc gamma R-mediated phagocytosis	KEGG PATHWAY	mmu04666	25	86	0.001454	0.0135114	ENSMUSG00000006304|ENSMUSG00000026656|ENSMUSG00000047945|ENSMUSG00000020516|ENSMUSG00000004508|ENSMUSG00000020451|ENSMUSG00000021948|ENSMUSG00000033335|ENSMUSG00000027665|ENSMUSG00000026288|ENSMUSG00000001729|ENSMUSG00000034116|ENSMUSG00000029465|ENSMUSG00000027695|ENSMUSG00000052151|ENSMUSG00000063358|ENSMUSG00000039936|ENSMUSG00000024867|ENSMUSG00000061878|ENSMUSG00000028126|ENSMUSG00000020901|…	http://www.genome.jp/kegg-bin/show_pathway?mmu04666/mmu:14130%09red/mmu:16331%09red/mmu:18720%09red/mmu:18706%09red/mmu:18707%09red/mmu:26413%09red/mmu:320207%09red/mmu:12928%09red/mmu:22324%09red/mmu:13430%09red/mmu:50784%09red/mmu:14389%09red/mmu:18719%09red/mmu:11651%09red/mmu:20698%09red/mmu:18805%09red/mmu:18753%09red/mmu:19354%09red/mmu:19353%09red/mmu:56378%09red/mmu:76709%09red/mmu:17969%…
Regulation of actin cytoskeleton	KEGG PATHWAY	mmu04810	49	216	0.00159601	0.0146364	ENSMUSG00000006304|ENSMUSG00000019254|ENSMUSG00000028126|ENSMUSG00000026193|ENSMUSG00000031565|ENSMUSG00000020451|ENSMUSG00000000555|ENSMUSG00000001847|ENSMUSG00000037509|ENSMUSG00000034801|ENSMUSG00000027646|ENSMUSG00000029465|ENSMUSG00000048376|ENSMUSG00000024867|ENSMUSG00000001507|ENSMUSG00000020611|ENSMUSG00000027087|ENSMUSG00000024048|ENSMUSG00000052397|ENSMUSG00000034116|ENSMUSG00000032773|…	http://www.genome.jp/kegg-bin/show_pathway?mmu04810/mmu:22350%09red/mmu:16653%09red/mmu:16409%09red/mmu:232807%09red/mmu:12928%09red/mmu:16402%09red/mmu:14176%09red/mmu:104099%09red/mmu:18706%09red/mmu:18707%09red/mmu:329165%09red/mmu:14184%09red/mmu:14186%09red/mmu:26413%09red/mmu:14674%09red/mmu:14182%09red/mmu:14183%09red/mmu:320207%09red/mmu:80857%09red/mmu:20130%09red/mmu:19303%09red/mmu:206…
ErbB signaling pathway	KEGG PATHWAY	mmu04012	25	88	0.00189189	0.0168773	ENSMUSG00000020366|ENSMUSG00000026596|ENSMUSG00000020516|ENSMUSG00000031714|ENSMUSG00000034801|ENSMUSG00000029377|ENSMUSG00000027665|ENSMUSG00000027646|ENSMUSG00000018166|ENSMUSG00000001729|ENSMUSG00000046709|ENSMUSG00000030265|ENSMUSG00000063358|ENSMUSG00000039936|ENSMUSG00000002948|ENSMUSG00000022637|ENSMUSG00000074923|ENSMUSG00000032475|ENSMUSG00000020901|ENSMUSG00000025499|ENSMUSG00000023067|…	http://www.genome.jp/kegg-bin/show_pathway?mmu04012/mmu:16653%09red/mmu:12575%09red/mmu:208650%09red/mmu:18706%09red/mmu:18707%09red/mmu:13867%09red/mmu:26414%09red/mmu:26413%09red/mmu:320207%09red/mmu:12928%09red/mmu:17973%09red/mmu:20663%09red/mmu:14388%09red/mmu:11651%09red/mmu:211323%09red/mmu:26400%09red/mmu:214230%09red/mmu:13874%09red/mmu:26420%09red/mmu:11352%09red/mmu:26396%09red/mmu:207…
Focal adhesion	KEGG PATHWAY	mmu04510	46	202	0.00203774	0.0179795	ENSMUSG00000020366|ENSMUSG00000028364|ENSMUSG00000019254|ENSMUSG00000026840|ENSMUSG00000029648|ENSMUSG00000029304|ENSMUSG00000034165|ENSMUSG00000068798|ENSMUSG00000026193|ENSMUSG00000052681|ENSMUSG00000034801|ENSMUSG00000005533|ENSMUSG00000025860|ENSMUSG00000000555|ENSMUSG00000001847|ENSMUSG00000027665|ENSMUSG00000027646|ENSMUSG00000032356|ENSMUSG00000001729|ENSMUSG00000001507|ENSMUSG00000027087|…	http://www.genome.jp/kegg-bin/show_pathway?mmu04510/mmu:215449%09red/mmu:232807%09red/mmu:21828%09red/mmu:16402%09red/mmu:16400%09red/mmu:104099%09red/mmu:192176%09red/mmu:18706%09red/mmu:21923%09red/mmu:19417%09red/mmu:22793%09red/mmu:170736%09red/mmu:18607%09red/mmu:26414%09red/mmu:26413%09red/mmu:14268%09red/mmu:320207%09red/mmu:12928%09red/mmu:19303%09red/mmu:23928%09red/mmu:19354%09red/mmu:2…
Protein processing in endoplasmic reticulum	KEGG PATHWAY	mmu04141	39	163	0.00205323	0.0180705	ENSMUSG00000045302|ENSMUSG00000000826|ENSMUSG00000020366|ENSMUSG00000002014|ENSMUSG00000071650|ENSMUSG00000027422|ENSMUSG00000075701|ENSMUSG00000055401|ENSMUSG00000078578|ENSMUSG00000031751|ENSMUSG00000042215|ENSMUSG00000025130|ENSMUSG00000020794|ENSMUSG00000023286|ENSMUSG00000005262|ENSMUSG00000027828|ENSMUSG00000019802|ENSMUSG00000009092|ENSMUSG00000043019|ENSMUSG00000036646|ENSMUSG00000046841|…	http://www.genome.jp/kegg-bin/show_pathway?mmu04141/mmu:227619%09red/mmu:20832%09red/mmu:109815%09red/mmu:66967%09red/mmu:67437%09red/mmu:64209%09red/mmu:50907%09red/mmu:69162%09red/mmu:26414%09red/mmu:50762%09red/mmu:140499%09red/mmu:18786%09red/mmu:26965%09red/mmu:66105%09red/mmu:81910%09red/mmu:15505%09red/mmu:13002%09red/mmu:216197%09red/mmu:56812%09red/mmu:17156%09red/mmu:70377%09red/mmu:226…
Prolactin signaling pathway	KEGG PATHWAY	mmu04917	22	74	0.0021547	0.0188527	ENSMUSG00000020027|ENSMUSG00000020366|ENSMUSG00000034801|ENSMUSG00000027665|ENSMUSG00000027646|ENSMUSG00000022015|ENSMUSG00000038485|ENSMUSG00000001729|ENSMUSG00000048756|ENSMUSG00000046709|ENSMUSG00000063157|ENSMUSG00000030265|ENSMUSG00000021250|ENSMUSG00000063358|ENSMUSG00000039936|ENSMUSG00000032578|ENSMUSG00000020901|ENSMUSG00000025499|ENSMUSG00000004040|ENSMUSG00000037104|ENSMUSG00000004864|…	http://www.genome.jp/kegg-bin/show_pathway?mmu04917/mmu:16653%09red/mmu:12991%09red/mmu:192157%09red/mmu:21943%09red/mmu:18706%09red/mmu:18707%09red/mmu:26415%09red/mmu:26414%09red/mmu:26413%09red/mmu:320207%09red/mmu:20848%09red/mmu:216233%09red/mmu:20663%09red/mmu:14281%09red/mmu:11651%09red/mmu:56468%09red/mmu:12700%09red/mmu:26420%09red/mmu:26396%09red/mmu:20779%09red/mmu:15461%09red/mmu:5648…
Choline metabolism in cancer	KEGG PATHWAY	mmu05231	27	101	0.00264673	0.0222478	ENSMUSG00000020366|ENSMUSG00000060002|ENSMUSG00000020516|ENSMUSG00000063358|ENSMUSG00000034801|ENSMUSG00000001847|ENSMUSG00000027665|ENSMUSG00000034731|ENSMUSG00000001729|ENSMUSG00000046709|ENSMUSG00000026812|ENSMUSG00000030265|ENSMUSG00000021250|ENSMUSG00000027695|ENSMUSG00000052151|ENSMUSG00000024122|ENSMUSG00000039936|ENSMUSG00000024867|ENSMUSG00000028019|ENSMUSG00000070738|ENSMUSG00000028126|…	http://www.genome.jp/kegg-bin/show_pathway?mmu05231/mmu:16653%09red/mmu:380921%09red/mmu:18720%09red/mmu:18706%09red/mmu:18707%09red/mmu:18607%09red/mmu:26414%09red/mmu:26413%09red/mmu:227333%09red/mmu:320207%09red/mmu:20663%09red/mmu:14281%09red/mmu:18719%09red/mmu:50784%09red/mmu:11651%09red/mmu:212862%09red/mmu:18805%09red/mmu:26420%09red/mmu:30805%09red/mmu:26396%09red/mmu:54635%09red/mmu:193…
Thyroid hormone signaling pathway	KEGG PATHWAY	mmu04919	30	117	0.00270767	0.0226873	ENSMUSG00000022521|ENSMUSG00000028645|ENSMUSG00000027665|ENSMUSG00000040061|ENSMUSG00000020937|ENSMUSG00000027646|ENSMUSG00000005034|ENSMUSG00000022951|ENSMUSG00000007107|ENSMUSG00000018501|ENSMUSG00000027087|ENSMUSG00000027878|ENSMUSG00000030265|ENSMUSG00000024122|ENSMUSG00000063358|ENSMUSG00000039936|ENSMUSG00000001729|ENSMUSG00000026576|ENSMUSG00000033161|ENSMUSG00000018076|ENSMUSG00000039943|…	http://www.genome.jp/kegg-bin/show_pathway?mmu04919/mmu:16653%09red/mmu:18749%09red/mmu:72469%09red/mmu:18640%09red/mmu:54720%09red/mmu:18706%09red/mmu:18707%09red/mmu:76199%09red/mmu:18607%09red/mmu:20525%09red/mmu:27222%09red/mmu:320207%09red/mmu:11928%09red/mmu:17977%09red/mmu:16410%09red/mmu:67821%09red/mmu:74055%09red/mmu:67381%09red/mmu:11651%09red/mmu:26413%09red/mmu:17888%09red/mmu:26396%…
Renal cell carcinoma	KEGG PATHWAY	mmu05211	20	66	0.00278984	0.023235	ENSMUSG00000022521|ENSMUSG00000001847|ENSMUSG00000027665|ENSMUSG00000031714|ENSMUSG00000020901|ENSMUSG00000025499|ENSMUSG00000063358|ENSMUSG00000055839|ENSMUSG00000058709|ENSMUSG00000035105|ENSMUSG00000039936|ENSMUSG00000017776|ENSMUSG00000001729|ENSMUSG00000035027|ENSMUSG00000068798|ENSMUSG00000052681|ENSMUSG00000030265|ENSMUSG00000074923|ENSMUSG00000034801|ENSMUSG00000028645	http://www.genome.jp/kegg-bin/show_pathway?mmu05211/mmu:109905%09red/mmu:112407%09red/mmu:112406%09red/mmu:20525%09red/mmu:26396%09red/mmu:16653%09red/mmu:26413%09red/mmu:215449%09red/mmu:320207%09red/mmu:12928%09red/mmu:19353%09red/mmu:14388%09red/mmu:67673%09red/mmu:12914%09red/mmu:11651%09red/mmu:214230%09red/mmu:18706%09red/mmu:18707%09red/mmu:20663%09red/mmu:15461%09red
Central carbon metabolism in cancer	KEGG PATHWAY	mmu05230	20	66	0.00278984	0.023235	ENSMUSG00000025161|ENSMUSG00000030849|ENSMUSG00000035027|ENSMUSG00000020901|ENSMUSG00000025499|ENSMUSG00000059146|ENSMUSG00000054252|ENSMUSG00000063358|ENSMUSG00000026103|ENSMUSG00000030265|ENSMUSG00000039936|ENSMUSG00000032294|ENSMUSG00000001729|ENSMUSG00000030110|ENSMUSG00000027665|ENSMUSG00000011752|ENSMUSG00000028645|ENSMUSG00000031565|ENSMUSG00000020122|ENSMUSG00000063229	http://www.genome.jp/kegg-bin/show_pathway?mmu05230/mmu:16653%09red/mmu:14660%09red/mmu:320207%09red/mmu:80879%09red/mmu:16828%09red/mmu:14182%09red/mmu:18213%09red/mmu:14183%09red/mmu:26396%09red/mmu:18746%09red/mmu:13649%09red/mmu:14184%09red/mmu:20525%09red/mmu:19713%09red/mmu:11651%09red/mmu:26413%09red/mmu:18706%09red/mmu:18707%09red/mmu:18648%09red/mmu:15461%09red
Gap junction	KEGG PATHWAY	mmu04540	24	86	0.00279736	0.0232529	ENSMUSG00000033910|ENSMUSG00000062380|ENSMUSG00000021478|ENSMUSG00000034801|ENSMUSG00000025162|ENSMUSG00000040061|ENSMUSG00000032562|ENSMUSG00000016255|ENSMUSG00000019942|ENSMUSG00000027646|ENSMUSG00000042644|ENSMUSG00000005034|ENSMUSG00000038668|ENSMUSG00000026202|ENSMUSG00000026228|ENSMUSG00000030265|ENSMUSG00000063358|ENSMUSG00000029334|ENSMUSG00000027523|ENSMUSG00000028019|ENSMUSG00000039943|…	http://www.genome.jp/kegg-bin/show_pathway?mmu04540/mmu:16653%09red/mmu:22152%09red/mmu:14683%09red/mmu:12534%09red/mmu:104318%09red/mmu:19092%09red/mmu:26413%09red/mmu:18749%09red/mmu:20663%09red/mmu:22145%09red/mmu:14745%09red/mmu:14678%09red/mmu:15461%09red/mmu:16440%09red/mmu:26396%09red/mmu:54635%09red/mmu:13488%09red/mmu:545486%09red/mmu:15559%09red/mmu:18796%09red/mmu:20779%09red/mmu:60596…
Rheumatoid arthritis	KEGG PATHWAY	mmu05323	23	81	0.00282351	0.0233223	ENSMUSG00000006269|ENSMUSG00000019210|ENSMUSG00000037405|ENSMUSG00000061353|ENSMUSG00000029648|ENSMUSG00000022015|ENSMUSG00000026166|ENSMUSG00000024401|ENSMUSG00000075122|ENSMUSG00000001750|ENSMUSG00000021250|ENSMUSG00000024121|ENSMUSG00000033379|ENSMUSG00000027398|ENSMUSG00000028111|ENSMUSG00000019302|ENSMUSG00000033793|ENSMUSG00000000982|ENSMUSG00000025383|ENSMUSG00000052459|ENSMUSG00000013160|…	http://www.genome.jp/kegg-bin/show_pathway?mmu05323/mmu:11972%09red/mmu:11973%09red/mmu:11975%09red/mmu:11433%09red/mmu:13038%09red/mmu:21943%09red/mmu:12519%09red/mmu:16193%09red/mmu:21926%09red/mmu:27060%09red/mmu:20315%09red/mmu:11964%09red/mmu:20297%09red/mmu:108664%09red/mmu:14281%09red/mmu:11984%09red/mmu:110935%09red/mmu:83430%09red/mmu:14254%09red/mmu:114143%09red/mmu:20302%09red/mmu:1617…
Staphylococcus aureus infection	KEGG PATHWAY	mmu05150	17	52	0.00296244	0.0242596	ENSMUSG00000037405|ENSMUSG00000052270|ENSMUSG00000036905|ENSMUSG00000090231|ENSMUSG00000045551|ENSMUSG00000024164|ENSMUSG00000030786|ENSMUSG00000026656|ENSMUSG00000049130|ENSMUSG00000059498|ENSMUSG00000059089|ENSMUSG00000016529|ENSMUSG00000036887|ENSMUSG00000079343|ENSMUSG00000056529|ENSMUSG00000040552|ENSMUSG00000036896	http://www.genome.jp/kegg-bin/show_pathway?mmu05150/mmu:12267%09red/mmu:14293%09red/mmu:14131%09red/mmu:14130%09red/mmu:16409%09red/mmu:12273%09red/mmu:19204%09red/mmu:246256%09red/mmu:14962%09red/mmu:12266%09red/mmu:14289%09red/mmu:12262%09red/mmu:12260%09red/mmu:317677%09red/mmu:15894%09red/mmu:12259%09red/mmu:16153%09red
Hepatitis B	KEGG PATHWAY	mmu05161	35	145	0.00298383	0.0243397	ENSMUSG00000020366|ENSMUSG00000023067|ENSMUSG00000022521|ENSMUSG00000003184|ENSMUSG00000070904|ENSMUSG00000033016|ENSMUSG00000027665|ENSMUSG00000024515|ENSMUSG00000100549|ENSMUSG00000027646|ENSMUSG00000042349|ENSMUSG00000037868|ENSMUSG00000020115|ENSMUSG00000022285|ENSMUSG00000024740|ENSMUSG00000046709|ENSMUSG00000076432|ENSMUSG00000025746|ENSMUSG00000000817|ENSMUSG00000030265|ENSMUSG00000021250|…	http://www.genome.jp/kegg-bin/show_pathway?mmu05161/mmu:16653%09red/mmu:22630%09red/mmu:12575%09red/mmu:13205%09red/mmu:15975%09red/mmu:18706%09red/mmu:18707%09red/mmu:16193%09red/mmu:21926%09red/mmu:13194%09red/mmu:26414%09red/mmu:26413%09red/mmu:11783%09red/mmu:22631%09red/mmu:320207%09red/mmu:54131%09red/mmu:13654%09red/mmu:20848%09red/mmu:18018%09red/mmu:16451%09red/mmu:14103%09red/mmu:14281%…
Phagosome	KEGG PATHWAY	mmu04145	40	173	0.00305137	0.0248326	ENSMUSG00000007458|ENSMUSG00000006269|ENSMUSG00000059498|ENSMUSG00000026656|ENSMUSG00000047193|ENSMUSG00000019210|ENSMUSG00000006519|ENSMUSG00000030707|ENSMUSG00000001847|ENSMUSG00000025044|ENSMUSG00000016255|ENSMUSG00000024164|ENSMUSG00000038195|ENSMUSG00000091705|ENSMUSG00000019302|ENSMUSG00000037936|ENSMUSG00000059089|ENSMUSG00000038642|ENSMUSG00000026390|ENSMUSG00000025816|ENSMUSG00000027087|…	http://www.genome.jp/kegg-bin/show_pathway?mmu04145/mmu:17167%09red/mmu:11973%09red/mmu:271457%09red/mmu:22145%09red/mmu:14130%09red/mmu:16409%09red/mmu:11975%09red/mmu:20288%09red/mmu:16402%09red/mmu:21828%09red/mmu:22152%09red/mmu:14997%09red/mmu:27060%09red/mmu:19349%09red/mmu:280408%09red/mmu:57743%09red/mmu:15013%09red/mmu:17972%09red/mmu:13040%09red/mmu:17113%09red/mmu:11972%09red/mmu:16410…
Circadian rhythm	KEGG PATHWAY	mmu04710	12	30	0.0032318	0.0260382	ENSMUSG00000067713|ENSMUSG00000028150|ENSMUSG00000029686|ENSMUSG00000020893|ENSMUSG00000032238|ENSMUSG00000029513|ENSMUSG00000022124|ENSMUSG00000030103|ENSMUSG00000068742|ENSMUSG00000055116|ENSMUSG00000022433|ENSMUSG00000025162	http://www.genome.jp/kegg-bin/show_pathway?mmu04710/mmu:19082%09red/mmu:19079%09red/mmu:50789%09red/mmu:18626%09red/mmu:26965%09red/mmu:12953%09red/mmu:104318%09red/mmu:11865%09red/mmu:19883%09red/mmu:20893%09red/mmu:27373%09red/mmu:19885%09red
B cell receptor signaling pathway	KEGG PATHWAY	mmu04662	21	72	0.00323906	0.0260767	ENSMUSG00000033220|ENSMUSG00000001847|ENSMUSG00000027665|ENSMUSG00000034116|ENSMUSG00000026288|ENSMUSG00000026656|ENSMUSG00000021250|ENSMUSG00000035027|ENSMUSG00000063358|ENSMUSG00000020901|ENSMUSG00000036526|ENSMUSG00000039936|ENSMUSG00000030595|ENSMUSG00000025499|ENSMUSG00000071042|ENSMUSG00000001729|ENSMUSG00000030577|ENSMUSG00000030265|ENSMUSG00000033016|ENSMUSG00000034801|ENSMUSG00000026616	http://www.genome.jp/kegg-bin/show_pathway?mmu04662/mmu:12483%09red/mmu:22324%09red/mmu:108723%09red/mmu:14130%09red/mmu:26396%09red/mmu:16653%09red/mmu:19354%09red/mmu:320207%09red/mmu:12902%09red/mmu:19353%09red/mmu:18036%09red/mmu:18706%09red/mmu:14281%09red/mmu:11651%09red/mmu:26413%09red/mmu:16331%09red/mmu:18707%09red/mmu:18018%09red/mmu:240168%09red/mmu:15461%09red/mmu:20663%09red
Phosphatidylinositol signaling system	KEGG PATHWAY	mmu04070	26	98	0.00341883	0.0272311	ENSMUSG00000058793|ENSMUSG00000019370|ENSMUSG00000036438|ENSMUSG00000026113|ENSMUSG00000027665|ENSMUSG00000040061|ENSMUSG00000026288|ENSMUSG00000020937|ENSMUSG00000024210|ENSMUSG00000042644|ENSMUSG00000021385|ENSMUSG00000034731|ENSMUSG00000003752|ENSMUSG00000015214|ENSMUSG00000032594|ENSMUSG00000030228|ENSMUSG00000029330|ENSMUSG00000039936|ENSMUSG00000024867|ENSMUSG00000028126|ENSMUSG00000070738|…	http://www.genome.jp/kegg-bin/show_pathway?mmu04070/mmu:74302%09red/mmu:12315%09red/mmu:12314%09red/mmu:72469%09red/mmu:53332%09red/mmu:18706%09red/mmu:18720%09red/mmu:233011%09red/mmu:16331%09red/mmu:18707%09red/mmu:18705%09red/mmu:74055%09red/mmu:227333%09red/mmu:320207%09red/mmu:269180%09red/mmu:271424%09red/mmu:27399%09red/mmu:18719%09red/mmu:380921%09red/mmu:110911%09red/mmu:74596%09red/mmu:…
TNF signaling pathway	KEGG PATHWAY	mmu04668	28	110	0.00400037	0.0312407	ENSMUSG00000020366|ENSMUSG00000021367|ENSMUSG00000002948|ENSMUSG00000026883|ENSMUSG00000037405|ENSMUSG00000027665|ENSMUSG00000053175|ENSMUSG00000026166|ENSMUSG00000024401|ENSMUSG00000046709|ENSMUSG00000021250|ENSMUSG00000021277|ENSMUSG00000063358|ENSMUSG00000018932|ENSMUSG00000026875|ENSMUSG00000029379|ENSMUSG00000001729|ENSMUSG00000000957|ENSMUSG00000027398|ENSMUSG00000027598|ENSMUSG00000020901|…	http://www.genome.jp/kegg-bin/show_pathway?mmu04668/mmu:16396%09red/mmu:22031%09red/mmu:16182%09red/mmu:18706%09red/mmu:18707%09red/mmu:16193%09red/mmu:21926%09red/mmu:26415%09red/mmu:26414%09red/mmu:26413%09red/mmu:13614%09red/mmu:69601%09red/mmu:320207%09red/mmu:17387%09red/mmu:22029%09red/mmu:14825%09red/mmu:20297%09red/mmu:330122%09red/mmu:12051%09red/mmu:14281%09red/mmu:21938%09red/mmu:11651…
RNA transport	KEGG PATHWAY	mmu03013	38	166	0.00438456	0.0334079	ENSMUSG00000054582|ENSMUSG00000020265|ENSMUSG00000027680|ENSMUSG00000005610|ENSMUSG00000057561|ENSMUSG00000034681|ENSMUSG00000058301|ENSMUSG00000063550|ENSMUSG00000043241|ENSMUSG00000045983|ENSMUSG00000041319|ENSMUSG00000053293|ENSMUSG00000010097|ENSMUSG00000027236|ENSMUSG00000028809|ENSMUSG00000022855|ENSMUSG00000003226|ENSMUSG00000015120|ENSMUSG00000022774|ENSMUSG00000021282|ENSMUSG00000000838|…	http://www.genome.jp/kegg-bin/show_pathway?mmu03013/mmu:53319%09red/mmu:20918%09red/mmu:17149%09red/mmu:226982%09red/mmu:386612%09red/mmu:23879%09red/mmu:192170%09red/mmu:108067%09red/mmu:217869%09red/mmu:19386%09red/mmu:13690%09red/mmu:75826%09red/mmu:66161%09red/mmu:326622%09red/mmu:14265%09red/mmu:27979%09red/mmu:53975%09red/mmu:51796%09red/mmu:56347%09red/mmu:67204%09red/mmu:70047%09red/mmu:1…
Mineral absorption	KEGG PATHWAY	mmu04978	15	45	0.00438555	0.0334079	ENSMUSG00000026576|ENSMUSG00000029188|ENSMUSG00000050708|ENSMUSG00000005413|ENSMUSG00000001225|ENSMUSG00000021565|ENSMUSG00000040808|ENSMUSG00000026177|ENSMUSG00000033688|ENSMUSG00000022479|ENSMUSG00000024661|ENSMUSG00000007107|ENSMUSG00000033161|ENSMUSG00000027365|ENSMUSG00000016327	http://www.genome.jp/kegg-bin/show_pathway?mmu04978/mmu:67821%09red/mmu:74338%09red/mmu:20531%09red/mmu:14319%09red/mmu:27222%09red/mmu:15368%09red/mmu:58800%09red/mmu:18173%09red/mmu:12309%09red/mmu:22337%09red/mmu:13487%09red/mmu:11928%09red/mmu:71775%09red/mmu:14325%09red/mmu:11931%09red
Endocrine resistance	KEGG PATHWAY	mmu01522	25	95	0.00441462	0.033605	ENSMUSG00000020366|ENSMUSG00000027646|ENSMUSG00000020516|ENSMUSG00000032185|ENSMUSG00000034801|ENSMUSG00000005533|ENSMUSG00000018501|ENSMUSG00000027665|ENSMUSG00000027314|ENSMUSG00000005034|ENSMUSG00000027523|ENSMUSG00000046709|ENSMUSG00000030265|ENSMUSG00000021250|ENSMUSG00000063358|ENSMUSG00000039936|ENSMUSG00000001729|ENSMUSG00000027878|ENSMUSG00000020901|ENSMUSG00000025499|ENSMUSG00000023067|…	http://www.genome.jp/kegg-bin/show_pathway?mmu01522/mmu:16653%09red/mmu:18749%09red/mmu:12575%09red/mmu:14683%09red/mmu:54485%09red/mmu:18706%09red/mmu:18707%09red/mmu:26415%09red/mmu:26414%09red/mmu:26413%09red/mmu:59035%09red/mmu:320207%09red/mmu:20663%09red/mmu:13388%09red/mmu:16001%09red/mmu:14281%09red/mmu:11651%09red/mmu:26420%09red/mmu:18129%09red/mmu:26396%09red/mmu:20779%09red/mmu:13649%…
Long-term depression	KEGG PATHWAY	mmu04730	18	60	0.00482249	0.0363847	ENSMUSG00000039943|ENSMUSG00000040061|ENSMUSG00000020349|ENSMUSG00000030265|ENSMUSG00000025499|ENSMUSG00000063358|ENSMUSG00000042644|ENSMUSG00000032058|ENSMUSG00000049796|ENSMUSG00000033910|ENSMUSG00000029334|ENSMUSG00000009630|ENSMUSG00000035027|ENSMUSG00000027523|ENSMUSG00000020524|ENSMUSG00000020611|ENSMUSG00000005533|ENSMUSG00000032562	http://www.genome.jp/kegg-bin/show_pathway?mmu04730/mmu:16653%09red/mmu:73699%09red/mmu:19092%09red/mmu:26413%09red/mmu:26396%09red/mmu:14674%09red/mmu:14683%09red/mmu:14678%09red/mmu:16001%09red/mmu:18798%09red/mmu:18796%09red/mmu:19053%09red/mmu:19052%09red/mmu:14799%09red/mmu:60596%09red/mmu:16440%09red/mmu:15461%09red/mmu:12918%09red
Dopaminergic synapse	KEGG PATHWAY	mmu04728	31	129	0.00525324	0.0390805	ENSMUSG00000020366|ENSMUSG00000020349|ENSMUSG00000019370|ENSMUSG00000021478|ENSMUSG00000009630|ENSMUSG00000055116|ENSMUSG00000036438|ENSMUSG00000071658|ENSMUSG00000040061|ENSMUSG00000032562|ENSMUSG00000029120|ENSMUSG00000022052|ENSMUSG00000042644|ENSMUSG00000032058|ENSMUSG00000005034|ENSMUSG00000027523|ENSMUSG00000046709|ENSMUSG00000057177|ENSMUSG00000021250|ENSMUSG00000001729|ENSMUSG00000004455|…	http://www.genome.jp/kegg-bin/show_pathway?mmu04728/mmu:73699%09red/mmu:71978%09red/mmu:12315%09red/mmu:12314%09red/mmu:14683%09red/mmu:226849%09red/mmu:14680%09red/mmu:269643%09red/mmu:26415%09red/mmu:13490%09red/mmu:19047%09red/mmu:18749%09red/mmu:19053%09red/mmu:19052%09red/mmu:14702%09red/mmu:14678%09red/mmu:14701%09red/mmu:16573%09red/mmu:14704%09red/mmu:606496%09red/mmu:26414%09red/mmu:1428…
Influenza A	KEGG PATHWAY	mmu05164	38	170	0.0060967	0.0438611	ENSMUSG00000020366|ENSMUSG00000046709|ENSMUSG00000030793|ENSMUSG00000022521|ENSMUSG00000003184|ENSMUSG00000002948|ENSMUSG00000070904|ENSMUSG00000063550|ENSMUSG00000037405|ENSMUSG00000027665|ENSMUSG00000029625|ENSMUSG00000100549|ENSMUSG00000010097|ENSMUSG00000042349|ENSMUSG00000022074|ENSMUSG00000022971|ENSMUSG00000030595|ENSMUSG00000023150|ENSMUSG00000024401|ENSMUSG00000022905|ENSMUSG00000025746|…	http://www.genome.jp/kegg-bin/show_pathway?mmu05164/mmu:53319%09red/mmu:54188%09red/mmu:15980%09red/mmu:22035%09red/mmu:15976%09red/mmu:26400%09red/mmu:15975%09red/mmu:18706%09red/mmu:18707%09red/mmu:16193%09red/mmu:21926%09red/mmu:66824%09red/mmu:26415%09red/mmu:26414%09red/mmu:26413%09red/mmu:320207%09red/mmu:18036%09red/mmu:54131%09red/mmu:16451%09red/mmu:14103%09red/mmu:16647%09red/mmu:16646%…
Measles	KEGG PATHWAY	mmu05162	32	137	0.00658034	0.0464792	ENSMUSG00000034165|ENSMUSG00000026656|ENSMUSG00000003184|ENSMUSG00000070904|ENSMUSG00000068227|ENSMUSG00000027665|ENSMUSG00000100549|ENSMUSG00000042349|ENSMUSG00000031805|ENSMUSG00000022971|ENSMUSG00000026778|ENSMUSG00000030595|ENSMUSG00000020115|ENSMUSG00000001729|ENSMUSG00000031392|ENSMUSG00000025746|ENSMUSG00000000817|ENSMUSG00000024387|ENSMUSG00000022074|ENSMUSG00000046707|ENSMUSG00000039936|…	http://www.genome.jp/kegg-bin/show_pathway?mmu05162/mmu:14130%09red/mmu:22035%09red/mmu:22034%09red/mmu:15976%09red/mmu:208650%09red/mmu:15975%09red/mmu:18761%09red/mmu:18706%09red/mmu:18707%09red/mmu:16193%09red/mmu:20400%09red/mmu:68652%09red/mmu:320207%09red/mmu:18036%09red/mmu:54131%09red/mmu:20848%09red/mmu:13000%09red/mmu:13001%09red/mmu:16451%09red/mmu:14103%09red/mmu:15980%09red/mmu:15964…

## Sheet: 7d Vs Sham
Pathway Analysis of target genes in the comparison between sham and VILI group on day 7
Term	Database	ID	Input number	Background number	P-Value	Corrected P-Value	Input	Hyperlink
Endocytosis	KEGG PATHWAY	mmu04144	101	278	9.64576e-09	2.66179e-07	ENSMUSG00000029518|ENSMUSG00000029648|ENSMUSG00000024772|ENSMUSG00000031729|ENSMUSG00000030110|ENSMUSG00000029053|ENSMUSG00000020817|ENSMUSG00000018001|ENSMUSG00000033335|ENSMUSG00000030849|ENSMUSG00000018008|ENSMUSG00000018166|ENSMUSG00000068227|ENSMUSG00000048076|ENSMUSG00000044641|ENSMUSG00000024104|ENSMUSG00000020184|ENSMUSG00000048832|ENSMUSG00000028745|ENSMUSG00000015733|ENSMUSG00000024563|…	http://www.genome.jp/kegg-bin/show_pathway?mmu04144/mmu:13196%09red/mmu:13867%09red/mmu:19349%09red/mmu:58220%09red/mmu:216963%09red/mmu:13430%09red/mmu:69710%09red/mmu:12340%09red/mmu:12343%09red/mmu:22365%09red/mmu:12345%09red/mmu:228998%09red/mmu:13858%09red/mmu:28006%09red/mmu:100017%09red/mmu:14254%09red/mmu:76709%09red/mmu:56443%09red/mmu:18571%09red/mmu:15461%09red/mmu:106572%09red/mmu:118…
PI3K-Akt signaling pathway	KEGG PATHWAY	mmu04151	113	341	7.60346e-08	1.84061e-06	ENSMUSG00000018965|ENSMUSG00000025856|ENSMUSG00000020516|ENSMUSG00000027381|ENSMUSG00000009630|ENSMUSG00000034801|ENSMUSG00000003070|ENSMUSG00000030849|ENSMUSG00000040329|ENSMUSG00000004591|ENSMUSG00000068227|ENSMUSG00000041769|ENSMUSG00000019966|ENSMUSG00000025915|ENSMUSG00000019846|ENSMUSG00000042826|ENSMUSG00000038612|ENSMUSG00000027947|ENSMUSG00000020184|ENSMUSG00000039936|ENSMUSG00000003068|…	http://www.genome.jp/kegg-bin/show_pathway?mmu04151/mmu:13685%09red/mmu:16775%09red/mmu:16774%09red/mmu:14710%09red/mmu:15976%09red/mmu:15975%09red/mmu:109333%09red/mmu:21923%09red/mmu:19053%09red/mmu:12826%09red/mmu:14709%09red/mmu:14702%09red/mmu:14701%09red/mmu:14704%09red/mmu:105787%09red/mmu:52432%09red/mmu:13856%09red/mmu:14254%09red/mmu:94216%09red/mmu:26396%09red/mmu:20104%09red/mmu:24122…
Pathways in cancer	KEGG PATHWAY	mmu05200	121	393	6.57245e-07	1.37338e-05	ENSMUSG00000025856|ENSMUSG00000022400|ENSMUSG00000030110|ENSMUSG00000045005|ENSMUSG00000030849|ENSMUSG00000027840|ENSMUSG00000061353|ENSMUSG00000019966|ENSMUSG00000041075|ENSMUSG00000020611|ENSMUSG00000019846|ENSMUSG00000032498|ENSMUSG00000031273|ENSMUSG00000027940|ENSMUSG00000020184|ENSMUSG00000058709|ENSMUSG00000039936|ENSMUSG00000029337|ENSMUSG00000028530|ENSMUSG00000039943|ENSMUSG00000009900|…	http://www.genome.jp/kegg-bin/show_pathway?mmu05200/mmu:16775%09red/mmu:16774%09red/mmu:432530%09red/mmu:14710%09red/mmu:67673%09red/mmu:56289%09red/mmu:170758%09red/mmu:64143%09red/mmu:14013%09red/mmu:14369%09red/mmu:18749%09red/mmu:14367%09red/mmu:12827%09red/mmu:12826%09red/mmu:94216%09red/mmu:14709%09red/mmu:14702%09red/mmu:14701%09red/mmu:76551%09red/mmu:14704%09red/mmu:22413%09red/mmu:22412…
MAPK signaling pathway	KEGG PATHWAY	mmu04010	85	254	2.151e-06	4.0464e-05	ENSMUSG00000024401|ENSMUSG00000036390|ENSMUSG00000021096|ENSMUSG00000001729|ENSMUSG00000054252|ENSMUSG00000020190|ENSMUSG00000031603|ENSMUSG00000028832|ENSMUSG00000025856|ENSMUSG00000033220|ENSMUSG00000022781|ENSMUSG00000020366|ENSMUSG00000020866|ENSMUSG00000025665|ENSMUSG00000016528|ENSMUSG00000095845|ENSMUSG00000018209|ENSMUSG00000052681|ENSMUSG00000027859|ENSMUSG00000031565|ENSMUSG00000033016|…	http://www.genome.jp/kegg-bin/show_pathway?mmu04010/mmu:224105%09red/mmu:17165%09red/mmu:17164%09red/mmu:215449%09red/mmu:14013%09red/mmu:16653%09red/mmu:13714%09red/mmu:26410%09red/mmu:22034%09red/mmu:14176%09red/mmu:26400%09red/mmu:18049%09red/mmu:330177%09red/mmu:170758%09red/mmu:12531%09red/mmu:192176%09red/mmu:17260%09red/mmu:102626%09red/mmu:19698%09red/mmu:240168%09red/mmu:13197%09red/mmu:…
HIF-1 signaling pathway	KEGG PATHWAY	mmu04066	45	106	5.26832e-06	9.35105e-05	ENSMUSG00000020009|ENSMUSG00000020190|ENSMUSG00000062070|ENSMUSG00000020516|ENSMUSG00000021367|ENSMUSG00000022400|ENSMUSG00000003031|ENSMUSG00000030695|ENSMUSG00000029711|ENSMUSG00000020826|ENSMUSG00000005534|ENSMUSG00000035105|ENSMUSG00000005533|ENSMUSG00000028645|ENSMUSG00000063229|ENSMUSG00000027665|ENSMUSG00000031490|ENSMUSG00000053819|ENSMUSG00000029648|ENSMUSG00000055839|ENSMUSG00000001131|…	http://www.genome.jp/kegg-bin/show_pathway?mmu04066/mmu:13685%09red/mmu:12576%09red/mmu:12575%09red/mmu:15368%09red/mmu:16000%09red/mmu:67673%09red/mmu:18641%09red/mmu:18706%09red/mmu:18707%09red/mmu:16193%09red/mmu:16194%09red/mmu:16337%09red/mmu:15979%09red/mmu:26413%09red/mmu:56438%09red/mmu:13614%09red/mmu:320207%09red/mmu:20848%09red/mmu:21857%09red/mmu:14433%09red/mmu:17347%09red/mmu:112407…
mRNA surveillance pathway	KEGG PATHWAY	mmu03015	41	92	5.39789e-06	9.51872e-05	ENSMUSG00000057000|ENSMUSG00000010097|ENSMUSG00000054582|ENSMUSG00000020349|ENSMUSG00000038374|ENSMUSG00000064030|ENSMUSG00000009630|ENSMUSG00000030655|ENSMUSG00000034681|ENSMUSG00000058301|ENSMUSG00000025134|ENSMUSG00000043241|ENSMUSG00000022194|ENSMUSG00000029625|ENSMUSG00000041769|ENSMUSG00000029120|ENSMUSG00000022052|ENSMUSG00000014956|ENSMUSG00000032058|ENSMUSG00000028809|ENSMUSG00000024400|…	http://www.genome.jp/kegg-bin/show_pathway?mmu03015/mmu:53319%09red/mmu:73699%09red/mmu:71978%09red/mmu:54188%09red/mmu:70248%09red/mmu:74320%09red/mmu:19047%09red/mmu:192170%09red/mmu:78428%09red/mmu:269643%09red/mmu:233789%09red/mmu:326622%09red/mmu:19704%09red/mmu:74737%09red/mmu:432508%09red/mmu:51792%09red/mmu:17149%09red/mmu:56522%09red/mmu:51796%09red/mmu:19053%09red/mmu:19052%09red/mmu:24…
Proteoglycans in cancer	KEGG PATHWAY	mmu05205	71	206	6.31398e-06	0.000110089	ENSMUSG00000020170|ENSMUSG00000018486|ENSMUSG00000035273|ENSMUSG00000023067|ENSMUSG00000031207|ENSMUSG00000005087|ENSMUSG00000020516|ENSMUSG00000001761|ENSMUSG00000018166|ENSMUSG00000063358|ENSMUSG00000026193|ENSMUSG00000010797|ENSMUSG00000025351|ENSMUSG00000031565|ENSMUSG00000031714|ENSMUSG00000005533|ENSMUSG00000000555|ENSMUSG00000001847|ENSMUSG00000040940|ENSMUSG00000027665|ENSMUSG00000027840|…	http://www.genome.jp/kegg-bin/show_pathway?mmu05205/mmu:22350%09red/mmu:16653%09red/mmu:320207%09red/mmu:15442%09red/mmu:12575%09red/mmu:11735%09red/mmu:319757%09red/mmu:12505%09red/mmu:16402%09red/mmu:208650%09red/mmu:13982%09red/mmu:19206%09red/mmu:192176%09red/mmu:18706%09red/mmu:18707%09red/mmu:21825%09red/mmu:12390%09red/mmu:21926%09red/mmu:18607%09red/mmu:14369%09red/mmu:26415%09red/mmu:264…
Osteoclast differentiation	KEGG PATHWAY	mmu04380	51	129	6.4782e-06	0.00011259	ENSMUSG00000020009|ENSMUSG00000020366|ENSMUSG00000022967|ENSMUSG00000002111|ENSMUSG00000059089|ENSMUSG00000021457|ENSMUSG00000071076|ENSMUSG00000023964|ENSMUSG00000004508|ENSMUSG00000002948|ENSMUSG00000015837|ENSMUSG00000033016|ENSMUSG00000006519|ENSMUSG00000059498|ENSMUSG00000001847|ENSMUSG00000028111|ENSMUSG00000027665|ENSMUSG00000033953|ENSMUSG00000015755|ENSMUSG00000030579|ENSMUSG00000024621|…	http://www.genome.jp/kegg-bin/show_pathway?mmu04380/mmu:12311%09red/mmu:14131%09red/mmu:14130%09red/mmu:11433%09red/mmu:13038%09red/mmu:22034%09red/mmu:21943%09red/mmu:15976%09red/mmu:18725%09red/mmu:15975%09red/mmu:18706%09red/mmu:18707%09red/mmu:19698%09red/mmu:21926%09red/mmu:15979%09red/mmu:26400%09red/mmu:20375%09red/mmu:26415%09red/mmu:26414%09red/mmu:26413%09red/mmu:68652%09red/mmu:320207%…
Ubiquitin mediated proteolysis	KEGG PATHWAY	mmu04120	53	137	7.09451e-06	0.00012174	ENSMUSG00000034343|ENSMUSG00000066149|ENSMUSG00000029472|ENSMUSG00000022184|ENSMUSG00000022400|ENSMUSG00000060860|ENSMUSG00000038780|ENSMUSG00000074781|ENSMUSG00000014355|ENSMUSG00000020794|ENSMUSG00000029203|ENSMUSG00000025860|ENSMUSG00000023286|ENSMUSG00000042572|ENSMUSG00000003308|ENSMUSG00000019944|ENSMUSG00000004364|ENSMUSG00000055839|ENSMUSG00000032405|ENSMUSG00000040782|ENSMUSG00000029397|…	http://www.genome.jp/kegg-bin/show_pathway?mmu04120/mmu:16396%09red/mmu:106052%09red/mmu:72584%09red/mmu:231380%09red/mmu:22034%09red/mmu:67673%09red/mmu:208650%09red/mmu:67921%09red/mmu:17999%09red/mmu:26554%09red/mmu:13194%09red/mmu:67615%09red/mmu:14897%09red/mmu:56228%09red/mmu:56438%09red/mmu:50868%09red/mmu:140499%09red/mmu:75788%09red/mmu:77891%09red/mmu:74153%09red/mmu:26965%09red/mmu:661…
FoxO signaling pathway	KEGG PATHWAY	mmu04068	52	134	8.03594e-06	0.000136598	ENSMUSG00000027381|ENSMUSG00000045092|ENSMUSG00000029513|ENSMUSG00000036390|ENSMUSG00000078566|ENSMUSG00000019970|ENSMUSG00000022521|ENSMUSG00000022433|ENSMUSG00000096472|ENSMUSG00000020366|ENSMUSG00000050697|ENSMUSG00000038894|ENSMUSG00000016529|ENSMUSG00000018209|ENSMUSG00000005534|ENSMUSG00000034801|ENSMUSG00000005533|ENSMUSG00000017376|ENSMUSG00000027665|ENSMUSG00000020053|ENSMUSG00000024515|…	http://www.genome.jp/kegg-bin/show_pathway?mmu04068/mmu:252870%09red/mmu:57436%09red/mmu:12576%09red/mmu:12575%09red/mmu:16653%09red/mmu:12125%09red/mmu:16000%09red/mmu:22035%09red/mmu:105787%09red/mmu:12579%09red/mmu:170755%09red/mmu:384783%09red/mmu:18706%09red/mmu:18707%09red/mmu:16193%09red/mmu:13197%09red/mmu:16337%09red/mmu:18607%09red/mmu:26415%09red/mmu:26414%09red/mmu:26413%09red/mmu:205…
Epstein-Barr virus infection	KEGG PATHWAY	mmu05169	71	210	1.07155e-05	0.000175809	ENSMUSG00000020366|ENSMUSG00000018965|ENSMUSG00000029478|ENSMUSG00000002111|ENSMUSG00000005198|ENSMUSG00000005625|ENSMUSG00000005087|ENSMUSG00000028874|ENSMUSG00000022521|ENSMUSG00000031585|ENSMUSG00000003031|ENSMUSG00000003184|ENSMUSG00000016529|ENSMUSG00000029613|ENSMUSG00000039067|ENSMUSG00000026616|ENSMUSG00000025487|ENSMUSG00000037405|ENSMUSG00000027665|ENSMUSG00000022346|ENSMUSG00000022710|…	http://www.genome.jp/kegg-bin/show_pathway?mmu05169/mmu:252870%09red/mmu:22630%09red/mmu:12576%09red/mmu:12575%09red/mmu:19179%09red/mmu:22031%09red/mmu:22033%09red/mmu:15182%09red/mmu:15013%09red/mmu:17999%09red/mmu:18706%09red/mmu:18707%09red/mmu:19698%09red/mmu:14997%09red/mmu:70428%09red/mmu:66997%09red/mmu:20375%09red/mmu:26415%09red/mmu:26414%09red/mmu:20602%09red/mmu:69833%09red/mmu:68652%…
Tuberculosis	KEGG PATHWAY	mmu05152	61	176	2.38307e-05	0.00036555	ENSMUSG00000020009|ENSMUSG00000038357|ENSMUSG00000020366|ENSMUSG00000016534|ENSMUSG00000038600|ENSMUSG00000026656|ENSMUSG00000019370|ENSMUSG00000020248|ENSMUSG00000024359|ENSMUSG00000022521|ENSMUSG00000020826|ENSMUSG00000059498|ENSMUSG00000056501|ENSMUSG00000016529|ENSMUSG00000070904|ENSMUSG00000036438|ENSMUSG00000058715|ENSMUSG00000030707|ENSMUSG00000001750|ENSMUSG00000030142|ENSMUSG00000100549|…	http://www.genome.jp/kegg-bin/show_pathway?mmu05152/mmu:22337%09red/mmu:13033%09red/mmu:271457%09red/mmu:14131%09red/mmu:14130%09red/mmu:16409%09red/mmu:12314%09red/mmu:22034%09red/mmu:11975%09red/mmu:12796%09red/mmu:16193%09red/mmu:242341%09red/mmu:21926%09red/mmu:15979%09red/mmu:27060%09red/mmu:26415%09red/mmu:26414%09red/mmu:26413%09red/mmu:140494%09red/mmu:11783%09red/mmu:53970%09red/mmu:2069…
Regulation of actin cytoskeleton	KEGG PATHWAY	mmu04810	70	216	3.75972e-05	0.00055855	ENSMUSG00000000157|ENSMUSG00000024048|ENSMUSG00000028126|ENSMUSG00000034801|ENSMUSG00000031207|ENSMUSG00000019254|ENSMUSG00000025856|ENSMUSG00000026737|ENSMUSG00000022781|ENSMUSG00000034868|ENSMUSG00000026193|ENSMUSG00000026782|ENSMUSG00000031565|ENSMUSG00000018012|ENSMUSG00000000555|ENSMUSG00000001847|ENSMUSG00000040940|ENSMUSG00000037509|ENSMUSG00000018293|ENSMUSG00000020451|ENSMUSG00000006304|…	http://www.genome.jp/kegg-bin/show_pathway?mmu04810/mmu:22350%09red/mmu:224105%09red/mmu:16409%09red/mmu:16653%09red/mmu:12928%09red/mmu:16402%09red/mmu:14176%09red/mmu:18643%09red/mmu:19047%09red/mmu:104099%09red/mmu:12061%09red/mmu:170758%09red/mmu:227753%09red/mmu:18706%09red/mmu:18707%09red/mmu:329165%09red/mmu:11472%09red/mmu:14184%09red/mmu:14186%09red/mmu:26413%09red/mmu:14674%09red/mmu:14…
Chagas disease (American trypanosomiasis)	KEGG PATHWAY	mmu05142	41	103	4.39417e-05	0.000641383	ENSMUSG00000020009|ENSMUSG00000020366|ENSMUSG00000020349|ENSMUSG00000020431|ENSMUSG00000020826|ENSMUSG00000009630|ENSMUSG00000016529|ENSMUSG00000036887|ENSMUSG00000027665|ENSMUSG00000040061|ENSMUSG00000032562|ENSMUSG00000029120|ENSMUSG00000022052|ENSMUSG00000032058|ENSMUSG00000041769|ENSMUSG00000021025|ENSMUSG00000027523|ENSMUSG00000036905|ENSMUSG00000031392|ENSMUSG00000046709|ENSMUSG00000024500|…	http://www.genome.jp/kegg-bin/show_pathway?mmu05142/mmu:73699%09red/mmu:71978%09red/mmu:432530%09red/mmu:14680%09red/mmu:22034%09red/mmu:269643%09red/mmu:18706%09red/mmu:18707%09red/mmu:16193%09red/mmu:12259%09red/mmu:21926%09red/mmu:15979%09red/mmu:26415%09red/mmu:26414%09red/mmu:26413%09red/mmu:320207%09red/mmu:18035%09red/mmu:51792%09red/mmu:14683%09red/mmu:20302%09red/mmu:19053%09red/mmu:1905…
Ras signaling pathway	KEGG PATHWAY	mmu04014	72	228	5.79148e-05	0.000831901	ENSMUSG00000032766|ENSMUSG00000020053|ENSMUSG00000020366|ENSMUSG00000034801|ENSMUSG00000019370|ENSMUSG00000031603|ENSMUSG00000025856|ENSMUSG00000029648|ENSMUSG00000022781|ENSMUSG00000029458|ENSMUSG00000004508|ENSMUSG00000068798|ENSMUSG00000036402|ENSMUSG00000018209|ENSMUSG00000005534|ENSMUSG00000036438|ENSMUSG00000024798|ENSMUSG00000010067|ENSMUSG00000005533|ENSMUSG00000029231|ENSMUSG00000001847|…	http://www.genome.jp/kegg-bin/show_pathway?mmu04014/mmu:17311%09red/mmu:224105%09red/mmu:271457%09red/mmu:23872%09red/mmu:11651%09red/mmu:12315%09red/mmu:12314%09red/mmu:14710%09red/mmu:16000%09red/mmu:14176%09red/mmu:56289%09red/mmu:19732%09red/mmu:18706%09red/mmu:18707%09red/mmu:19417%09red/mmu:64143%09red/mmu:16337%09red/mmu:54153%09red/mmu:14186%09red/mmu:26414%09red/mmu:26413%09red/mmu:13636…
Hippo signaling pathway	KEGG PATHWAY	mmu04390	53	154	9.09388e-05	0.00125475	ENSMUSG00000034165|ENSMUSG00000018965|ENSMUSG00000020349|ENSMUSG00000004455|ENSMUSG00000041769|ENSMUSG00000009630|ENSMUSG00000015957|ENSMUSG00000010797|ENSMUSG00000010067|ENSMUSG00000024182|ENSMUSG00000045005|ENSMUSG00000029053|ENSMUSG00000053110|ENSMUSG00000025162|ENSMUSG00000032058|ENSMUSG00000027840|ENSMUSG00000022346|ENSMUSG00000029120|ENSMUSG00000049551|ENSMUSG00000022052|ENSMUSG00000031681|…	http://www.genome.jp/kegg-bin/show_pathway?mmu04390/mmu:73699%09red/mmu:16798%09red/mmu:71978%09red/mmu:269643%09red/mmu:13544%09red/mmu:319710%09red/mmu:56289%09red/mmu:104318%09red/mmu:12167%09red/mmu:21676%09red/mmu:18762%09red/mmu:12005%09red/mmu:97064%09red/mmu:16415%09red/mmu:14369%09red/mmu:19047%09red/mmu:22631%09red/mmu:22630%09red/mmu:14367%09red/mmu:21416%09red/mmu:58220%09red/mmu:2141…
Rap1 signaling pathway	KEGG PATHWAY	mmu04015	68	216	9.85202e-05	0.00134735	ENSMUSG00000020053|ENSMUSG00000024070|ENSMUSG00000029648|ENSMUSG00000020431|ENSMUSG00000019370|ENSMUSG00000031603|ENSMUSG00000025856|ENSMUSG00000027646|ENSMUSG00000068798|ENSMUSG00000005534|ENSMUSG00000036438|ENSMUSG00000031565|ENSMUSG00000052681|ENSMUSG00000005533|ENSMUSG00000029053|ENSMUSG00000029231|ENSMUSG00000001847|ENSMUSG00000030849|ENSMUSG00000040061|ENSMUSG00000032562|ENSMUSG00000018293|…	http://www.genome.jp/kegg-bin/show_pathway?mmu04015/mmu:16653%09red/mmu:17311%09red/mmu:14293%09red/mmu:215449%09red/mmu:11651%09red/mmu:16409%09red/mmu:12314%09red/mmu:432530%09red/mmu:12928%09red/mmu:14176%09red/mmu:18643%09red/mmu:170758%09red/mmu:18706%09red/mmu:18707%09red/mmu:18762%09red/mmu:64143%09red/mmu:21825%09red/mmu:16337%09red/mmu:75292%09red/mmu:14184%09red/mmu:13636%09red/mmu:2641…
Insulin signaling pathway	KEGG PATHWAY	mmu04910	49	140	0.00011797	0.00157173	ENSMUSG00000020027|ENSMUSG00000029513|ENSMUSG00000020366|ENSMUSG00000032601|ENSMUSG00000027540|ENSMUSG00000019370|ENSMUSG00000020516|ENSMUSG00000018566|ENSMUSG00000050697|ENSMUSG00000038894|ENSMUSG00000005534|ENSMUSG00000036438|ENSMUSG00000034801|ENSMUSG00000029053|ENSMUSG00000067713|ENSMUSG00000027665|ENSMUSG00000031490|ENSMUSG00000014956|ENSMUSG00000005034|ENSMUSG00000078650|ENSMUSG00000001729|…	http://www.genome.jp/kegg-bin/show_pathway?mmu04910/mmu:16653%09red/mmu:320207%09red/mmu:12315%09red/mmu:12314%09red/mmu:110095%09red/mmu:105787%09red/mmu:232493%09red/mmu:13685%09red/mmu:384783%09red/mmu:110078%09red/mmu:18706%09red/mmu:18707%09red/mmu:18762%09red/mmu:16332%09red/mmu:16337%09red/mmu:18607%09red/mmu:19046%09red/mmu:19246%09red/mmu:26414%09red/mmu:26413%09red/mmu:20528%09red/mmu:1…
AMPK signaling pathway	KEGG PATHWAY	mmu04152	45	127	0.000174733	0.0022479	ENSMUSG00000020053|ENSMUSG00000029513|ENSMUSG00000029512|ENSMUSG00000038894|ENSMUSG00000020349|ENSMUSG00000027936|ENSMUSG00000020516|ENSMUSG00000018566|ENSMUSG00000077450|ENSMUSG00000050697|ENSMUSG00000009630|ENSMUSG00000005534|ENSMUSG00000005533|ENSMUSG00000067713|ENSMUSG00000027665|ENSMUSG00000026457|ENSMUSG00000036707|ENSMUSG00000029120|ENSMUSG00000022052|ENSMUSG00000032058|ENSMUSG00000041769|…	http://www.genome.jp/kegg-bin/show_pathway?mmu04152/mmu:72674%09red/mmu:13685%09red/mmu:71978%09red/mmu:226849%09red/mmu:269643%09red/mmu:105787%09red/mmu:232493%09red/mmu:18640%09red/mmu:384783%09red/mmu:18707%09red/mmu:18706%09red/mmu:11450%09red/mmu:16337%09red/mmu:18607%09red/mmu:19079%09red/mmu:73699%09red/mmu:20528%09red/mmu:320207%09red/mmu:22241%09red/mmu:51792%09red/mmu:19326%09red/mmu:1…
mTOR signaling pathway	KEGG PATHWAY	mmu04150	52	155	0.000176457	0.0022647	ENSMUSG00000028062|ENSMUSG00000029512|ENSMUSG00000039105|ENSMUSG00000031309|ENSMUSG00000019210|ENSMUSG00000005534|ENSMUSG00000028646|ENSMUSG00000005533|ENSMUSG00000018486|ENSMUSG00000027665|ENSMUSG00000027840|ENSMUSG00000015957|ENSMUSG00000045005|ENSMUSG00000049551|ENSMUSG00000049550|ENSMUSG00000003068|ENSMUSG00000030842|ENSMUSG00000061175|ENSMUSG00000050288|ENSMUSG00000024401|ENSMUSG00000020053|…	http://www.genome.jp/kegg-bin/show_pathway?mmu04150/mmu:108664%09red/mmu:11973%09red/mmu:13685%09red/mmu:16653%09red/mmu:66335%09red/mmu:105787%09red/mmu:329679%09red/mmu:18706%09red/mmu:18707%09red/mmu:14367%09red/mmu:21926%09red/mmu:16337%09red/mmu:18607%09red/mmu:14369%09red/mmu:110651%09red/mmu:26413%09red/mmu:22412%09red/mmu:68775%09red/mmu:320207%09red/mmu:83409%09red/mmu:54170%09red/mmu:56…
Tight junction	KEGG PATHWAY	mmu04530	48	140	0.000203656	0.00257119	ENSMUSG00000066720|ENSMUSG00000020349|ENSMUSG00000044279|ENSMUSG00000023906|ENSMUSG00000034868|ENSMUSG00000009630|ENSMUSG00000024812|ENSMUSG00000029053|ENSMUSG00000030189|ENSMUSG00000021948|ENSMUSG00000047230|ENSMUSG00000032562|ENSMUSG00000029120|ENSMUSG00000024091|ENSMUSG00000022052|ENSMUSG00000027646|ENSMUSG00000032058|ENSMUSG00000041769|ENSMUSG00000054808|ENSMUSG00000026778|ENSMUSG00000021108|…	http://www.genome.jp/kegg-bin/show_pathway?mmu04530/mmu:16653%09red/mmu:73699%09red/mmu:71978%09red/mmu:56863%09red/mmu:93742%09red/mmu:269643%09red/mmu:18761%09red/mmu:18762%09red/mmu:11472%09red/mmu:21873%09red/mmu:12739%09red/mmu:12738%09red/mmu:269587%09red/mmu:208431%09red/mmu:30960%09red/mmu:20130%09red/mmu:51792%09red/mmu:58220%09red/mmu:19053%09red/mmu:13043%09red/mmu:13000%09red/mmu:1645…
Toll-like receptor signaling pathway	KEGG PATHWAY	mmu04620	38	102	0.000242511	0.00296508	ENSMUSG00000029417|ENSMUSG00000029304|ENSMUSG00000025139|ENSMUSG00000020366|ENSMUSG00000003184|ENSMUSG00000002948|ENSMUSG00000070904|ENSMUSG00000001847|ENSMUSG00000027665|ENSMUSG00000016024|ENSMUSG00000015755|ENSMUSG00000100549|ENSMUSG00000042349|ENSMUSG00000024235|ENSMUSG00000022971|ENSMUSG00000020115|ENSMUSG00000021025|ENSMUSG00000024401|ENSMUSG00000075122|ENSMUSG00000031392|ENSMUSG00000046709|…	http://www.genome.jp/kegg-bin/show_pathway?mmu04620/mmu:22031%09red/mmu:13038%09red/mmu:22034%09red/mmu:15976%09red/mmu:12519%09red/mmu:15975%09red/mmu:18706%09red/mmu:18707%09red/mmu:16193%09red/mmu:21926%09red/mmu:26415%09red/mmu:26414%09red/mmu:26413%09red/mmu:26410%09red/mmu:68652%09red/mmu:320207%09red/mmu:18035%09red/mmu:54131%09red/mmu:20302%09red/mmu:17329%09red/mmu:21899%09red/mmu:15964%…
Spliceosome	KEGG PATHWAY	mmu03040	45	131	0.000305151	0.00362868	ENSMUSG00000059208|ENSMUSG00000038374|ENSMUSG00000030216|ENSMUSG00000018379|ENSMUSG00000044155|ENSMUSG00000024735|ENSMUSG00000059005|ENSMUSG00000060288|ENSMUSG00000025134|ENSMUSG00000091625|ENSMUSG00000020850|ENSMUSG00000010608|ENSMUSG00000024097|ENSMUSG00000061136|ENSMUSG00000024604|ENSMUSG00000078765|ENSMUSG00000032407|ENSMUSG00000025024|ENSMUSG00000024422|ENSMUSG00000028821|ENSMUSG00000002129|…	http://www.genome.jp/kegg-bin/show_pathway?mmu03040/mmu:192159%09red/mmu:17149%09red/mmu:20383%09red/mmu:319322%09red/mmu:68879%09red/mmu:76479%09red/mmu:192170%09red/mmu:72047%09red/mmu:20384%09red/mmu:66618%09red/mmu:68592%09red/mmu:110809%09red/mmu:233073%09red/mmu:108121%09red/mmu:66101%09red/mmu:56194%09red/mmu:23983%09red/mmu:76522%09red/mmu:76938%09red/mmu:320632%09red/mmu:107701%09red/mmu…
Focal adhesion	KEGG PATHWAY	mmu04510	62	202	0.000339206	0.00395558	ENSMUSG00000020053|ENSMUSG00000020366|ENSMUSG00000028364|ENSMUSG00000019254|ENSMUSG00000025856|ENSMUSG00000029648|ENSMUSG00000022781|ENSMUSG00000004455|ENSMUSG00000034868|ENSMUSG00000068798|ENSMUSG00000026193|ENSMUSG00000052681|ENSMUSG00000034801|ENSMUSG00000005533|ENSMUSG00000025860|ENSMUSG00000000555|ENSMUSG00000001847|ENSMUSG00000027665|ENSMUSG00000027646|ENSMUSG00000014956|ENSMUSG00000018012|…	http://www.genome.jp/kegg-bin/show_pathway?mmu04510/mmu:224105%09red/mmu:16775%09red/mmu:16774%09red/mmu:232807%09red/mmu:21828%09red/mmu:16402%09red/mmu:16400%09red/mmu:104099%09red/mmu:21923%09red/mmu:170758%09red/mmu:192176%09red/mmu:18706%09red/mmu:18707%09red/mmu:21825%09red/mmu:12390%09red/mmu:12445%09red/mmu:11472%09red/mmu:18607%09red/mmu:26414%09red/mmu:26413%09red/mmu:14268%09red/mmu:32…
Signaling pathways regulating pluripotency of stem cells	KEGG PATHWAY	mmu04550	47	140	0.000346545	0.00401526	ENSMUSG00000024563|ENSMUSG00000021756|ENSMUSG00000003032|ENSMUSG00000048904|ENSMUSG00000029249|ENSMUSG00000024182|ENSMUSG00000045005|ENSMUSG00000005533|ENSMUSG00000027660|ENSMUSG00000030849|ENSMUSG00000027840|ENSMUSG00000022346|ENSMUSG00000031565|ENSMUSG00000049551|ENSMUSG00000000532|ENSMUSG00000031681|ENSMUSG00000015957|ENSMUSG00000042745|ENSMUSG00000005320|ENSMUSG00000041075|ENSMUSG00000027358|…	http://www.genome.jp/kegg-bin/show_pathway?mmu04550/mmu:16653%09red/mmu:13544%09red/mmu:11479%09red/mmu:12167%09red/mmu:18706%09red/mmu:18707%09red/mmu:12005%09red/mmu:16195%09red/mmu:14184%09red/mmu:14369%09red/mmu:26415%09red/mmu:26413%09red/mmu:14182%09red/mmu:14183%09red/mmu:320207%09red/mmu:14367%09red/mmu:76073%09red/mmu:19712%09red/mmu:16324%09red/mmu:20848%09red/mmu:20482%09red/mmu:16451%…
Hepatitis C	KEGG PATHWAY	mmu05160	46	136	0.000348178	0.00402557	ENSMUSG00000079339|ENSMUSG00000020366|ENSMUSG00000020349|ENSMUSG00000023906|ENSMUSG00000066720|ENSMUSG00000003184|ENSMUSG00000009630|ENSMUSG00000070904|ENSMUSG00000029613|ENSMUSG00000034801|ENSMUSG00000047230|ENSMUSG00000029120|ENSMUSG00000100549|ENSMUSG00000022052|ENSMUSG00000037936|ENSMUSG00000042349|ENSMUSG00000032058|ENSMUSG00000041769|ENSMUSG00000032405|ENSMUSG00000022971|ENSMUSG00000020115|…	http://www.genome.jp/kegg-bin/show_pathway?mmu05160/mmu:16653%09red/mmu:73699%09red/mmu:16835%09red/mmu:71978%09red/mmu:56863%09red/mmu:22031%09red/mmu:22034%09red/mmu:15976%09red/mmu:15975%09red/mmu:20778%09red/mmu:269643%09red/mmu:18706%09red/mmu:18707%09red/mmu:21926%09red/mmu:18607%09red/mmu:12738%09red/mmu:26415%09red/mmu:26414%09red/mmu:26413%09red/mmu:12575%09red/mmu:72930%09red/mmu:320207…
Chemokine signaling pathway	KEGG PATHWAY	mmu04062	60	194	0.000356219	0.00410979	ENSMUSG00000032766|ENSMUSG00000029417|ENSMUSG00000033220|ENSMUSG00000020431|ENSMUSG00000070464|ENSMUSG00000068798|ENSMUSG00000019122|ENSMUSG00000036402|ENSMUSG00000052681|ENSMUSG00000034801|ENSMUSG00000029053|ENSMUSG00000021948|ENSMUSG00000071658|ENSMUSG00000027665|ENSMUSG00000040061|ENSMUSG00000032562|ENSMUSG00000018920|ENSMUSG00000061353|ENSMUSG00000023078|ENSMUSG00000027646|ENSMUSG00000026166|…	http://www.genome.jp/kegg-bin/show_pathway?mmu04062/mmu:16653%09red/mmu:320207%09red/mmu:215449%09red/mmu:11651%09red/mmu:432530%09red/mmu:14710%09red/mmu:20303%09red/mmu:541307%09red/mmu:18706%09red/mmu:18707%09red/mmu:18762%09red/mmu:26413%09red/mmu:14191%09red/mmu:100042493%09red/mmu:66066%09red/mmu:56221%09red/mmu:18749%09red/mmu:12928%09red/mmu:18035%09red/mmu:18036%09red/mmu:14702%09red/mmu…
Fc gamma R-mediated phagocytosis	KEGG PATHWAY	mmu04666	33	86	0.000395103	0.0044868	ENSMUSG00000006304|ENSMUSG00000026656|ENSMUSG00000047945|ENSMUSG00000021457|ENSMUSG00000020516|ENSMUSG00000004508|ENSMUSG00000020451|ENSMUSG00000021948|ENSMUSG00000033335|ENSMUSG00000027665|ENSMUSG00000026288|ENSMUSG00000015947|ENSMUSG00000026879|ENSMUSG00000001729|ENSMUSG00000026395|ENSMUSG00000069662|ENSMUSG00000034116|ENSMUSG00000029465|ENSMUSG00000063358|ENSMUSG00000052151|ENSMUSG00000039936|…	http://www.genome.jp/kegg-bin/show_pathway?mmu04666/mmu:14130%09red/mmu:14389%09red/mmu:16331%09red/mmu:18720%09red/mmu:227753%09red/mmu:18706%09red/mmu:18707%09red/mmu:16332%09red/mmu:13196%09red/mmu:26413%09red/mmu:19264%09red/mmu:320207%09red/mmu:12928%09red/mmu:17118%09red/mmu:22324%09red/mmu:13430%09red/mmu:50784%09red/mmu:14129%09red/mmu:18719%09red/mmu:11651%09red/mmu:20963%09red/mmu:20698…
Transcriptional misregulation in cancer	KEGG PATHWAY	mmu05202	55	174	0.000397216	0.00450137	ENSMUSG00000028341|ENSMUSG00000002111|ENSMUSG00000037992|ENSMUSG00000026875|ENSMUSG00000025856|ENSMUSG00000031681|ENSMUSG00000003031|ENSMUSG00000056501|ENSMUSG00000074403|ENSMUSG00000018501|ENSMUSG00000011960|ENSMUSG00000005533|ENSMUSG00000059436|ENSMUSG00000028736|ENSMUSG00000022200|ENSMUSG00000022346|ENSMUSG00000043613|ENSMUSG00000027315|ENSMUSG00000024621|ENSMUSG00000031538|ENSMUSG00000068227|…	http://www.genome.jp/kegg-bin/show_pathway?mmu05202/mmu:108829%09red/mmu:16409%09red/mmu:15081%09red/mmu:68938%09red/mmu:15182%09red/mmu:319154%09red/mmu:17187%09red/mmu:12575%09red/mmu:12393%09red/mmu:16193%09red/mmu:12576%09red/mmu:20375%09red/mmu:16599%09red/mmu:18509%09red/mmu:19126%09red/mmu:13714%09red/mmu:21912%09red/mmu:15077%09red/mmu:16185%09red/mmu:80859%09red/mmu:15078%09red/mmu:17260…
Lysosome	KEGG PATHWAY	mmu04142	43	125	0.000399823	0.00452146	ENSMUSG00000007458|ENSMUSG00000021665|ENSMUSG00000031266|ENSMUSG00000001751|ENSMUSG00000038600|ENSMUSG00000028048|ENSMUSG00000025351|ENSMUSG00000035847|ENSMUSG00000024480|ENSMUSG00000010051|ENSMUSG00000004207|ENSMUSG00000016256|ENSMUSG00000031447|ENSMUSG00000018774|ENSMUSG00000009090|ENSMUSG00000038642|ENSMUSG00000032359|ENSMUSG00000025759|ENSMUSG00000017760|ENSMUSG00000015027|ENSMUSG00000028238|…	http://www.genome.jp/kegg-bin/show_pathway?mmu04142/mmu:11605%09red/mmu:13033%09red/mmu:13036%09red/mmu:11433%09red/mmu:11432%09red/mmu:235504%09red/mmu:16541%09red/mmu:74325%09red/mmu:12512%09red/mmu:12514%09red/mmu:15931%09red/mmu:52120%09red/mmu:27060%09red/mmu:242341%09red/mmu:140494%09red/mmu:11975%09red/mmu:110006%09red/mmu:18173%09red/mmu:74008%09red/mmu:13040%09red/mmu:19141%09red/mmu:130…
Insulin resistance	KEGG PATHWAY	mmu04931	39	110	0.000450728	0.00502379	ENSMUSG00000029513|ENSMUSG00000020366|ENSMUSG00000033871|ENSMUSG00000039515|ENSMUSG00000034160|ENSMUSG00000027540|ENSMUSG00000027936|ENSMUSG00000031309|ENSMUSG00000018566|ENSMUSG00000050697|ENSMUSG00000038894|ENSMUSG00000005534|ENSMUSG00000028645|ENSMUSG00000021948|ENSMUSG00000027665|ENSMUSG00000021069|ENSMUSG00000014956|ENSMUSG00000025220|ENSMUSG00000026778|ENSMUSG00000078650|ENSMUSG00000024401|…	http://www.genome.jp/kegg-bin/show_pathway?mmu04931/mmu:110095%09red/mmu:105787%09red/mmu:232493%09red/mmu:384783%09red/mmu:18761%09red/mmu:18706%09red/mmu:18707%09red/mmu:18762%09red/mmu:21926%09red/mmu:16193%09red/mmu:16337%09red/mmu:18607%09red/mmu:19046%09red/mmu:19246%09red/mmu:110651%09red/mmu:20525%09red/mmu:20528%09red/mmu:320207%09red/mmu:18035%09red/mmu:20848%09red/mmu:76055%09red/mmu:6…
Wnt signaling pathway	KEGG PATHWAY	mmu04310	47	143	0.000507355	0.00555224	ENSMUSG00000042988|ENSMUSG00000020366|ENSMUSG00000033220|ENSMUSG00000040260|ENSMUSG00000031548|ENSMUSG00000022521|ENSMUSG00000022400|ENSMUSG00000028344|ENSMUSG00000024182|ENSMUSG00000045005|ENSMUSG00000033016|ENSMUSG00000018012|ENSMUSG00000027840|ENSMUSG00000017376|ENSMUSG00000040061|ENSMUSG00000022346|ENSMUSG00000030970|ENSMUSG00000049551|ENSMUSG00000053819|ENSMUSG00000033953|ENSMUSG00000024985|…	http://www.genome.jp/kegg-bin/show_pathway?mmu04310/mmu:13017%09red/mmu:13544%09red/mmu:17869%09red/mmu:170758%09red/mmu:319478%09red/mmu:93840%09red/mmu:12005%09red/mmu:75826%09red/mmu:14369%09red/mmu:26414%09red/mmu:56438%09red/mmu:18749%09red/mmu:76441%09red/mmu:14367%09red/mmu:21416%09red/mmu:26965%09red/mmu:21415%09red/mmu:19354%09red/mmu:20317%09red/mmu:72293%09red/mmu:13000%09red/mmu:18018…
Oocyte meiosis	KEGG PATHWAY	mmu04114	39	113	0.000687607	0.00717874	ENSMUSG00000020300|ENSMUSG00000023908|ENSMUSG00000018965|ENSMUSG00000020349|ENSMUSG00000020431|ENSMUSG00000019370|ENSMUSG00000029472|ENSMUSG00000031309|ENSMUSG00000022400|ENSMUSG00000009630|ENSMUSG00000036438|ENSMUSG00000014355|ENSMUSG00000005533|ENSMUSG00000053819|ENSMUSG00000042644|ENSMUSG00000014956|ENSMUSG00000032058|ENSMUSG00000048230|ENSMUSG00000005034|ENSMUSG00000025135|ENSMUSG00000022285|…	http://www.genome.jp/kegg-bin/show_pathway?mmu04114/mmu:73699%09red/mmu:22630%09red/mmu:12315%09red/mmu:12314%09red/mmu:432530%09red/mmu:59008%09red/mmu:226849%09red/mmu:18667%09red/mmu:66440%09red/mmu:110651%09red/mmu:26413%09red/mmu:56438%09red/mmu:268930%09red/mmu:22631%09red/mmu:18749%09red/mmu:51792%09red/mmu:26965%09red/mmu:19053%09red/mmu:19052%09red/mmu:56739%09red/mmu:78803%09red/mmu:190…
Thyroid hormone signaling pathway	KEGG PATHWAY	mmu04919	40	117	0.000687755	0.00717874	ENSMUSG00000064127|ENSMUSG00000022521|ENSMUSG00000028645|ENSMUSG00000027665|ENSMUSG00000040061|ENSMUSG00000022346|ENSMUSG00000040907|ENSMUSG00000020937|ENSMUSG00000027646|ENSMUSG00000005034|ENSMUSG00000022951|ENSMUSG00000007107|ENSMUSG00000039601|ENSMUSG00000018501|ENSMUSG00000027087|ENSMUSG00000020647|ENSMUSG00000027878|ENSMUSG00000030265|ENSMUSG00000001729|ENSMUSG00000020184|ENSMUSG00000063358|…	http://www.genome.jp/kegg-bin/show_pathway?mmu04919/mmu:16653%09red/mmu:320207%09red/mmu:15182%09red/mmu:72469%09red/mmu:232975%09red/mmu:13982%09red/mmu:54720%09red/mmu:18798%09red/mmu:18706%09red/mmu:18707%09red/mmu:76199%09red/mmu:18607%09red/mmu:26413%09red/mmu:27222%09red/mmu:18749%09red/mmu:18796%09red/mmu:11928%09red/mmu:107585%09red/mmu:17979%09red/mmu:16410%09red/mmu:67821%09red/mmu:7405…
Adherens junction	KEGG PATHWAY	mmu04520	29	75	0.000781874	0.00795443	ENSMUSG00000027540|ENSMUSG00000022521|ENSMUSG00000006411|ENSMUSG00000005534|ENSMUSG00000031565|ENSMUSG00000018012|ENSMUSG00000017376|ENSMUSG00000024515|ENSMUSG00000027646|ENSMUSG00000022656|ENSMUSG00000024985|ENSMUSG00000062300|ENSMUSG00000005533|ENSMUSG00000034101|ENSMUSG00000025812|ENSMUSG00000054808|ENSMUSG00000046707|ENSMUSG00000001847|ENSMUSG00000063358|ENSMUSG00000055799|ENSMUSG00000068036|…	http://www.genome.jp/kegg-bin/show_pathway?mmu04520/mmu:380928%09red/mmu:19294%09red/mmu:71740%09red/mmu:170758%09red/mmu:11472%09red/mmu:16337%09red/mmu:19246%09red/mmu:26413%09red/mmu:14182%09red/mmu:21416%09red/mmu:21415%09red/mmu:13000%09red/mmu:18099%09red/mmu:16001%09red/mmu:12388%09red/mmu:60595%09red/mmu:21812%09red/mmu:93742%09red/mmu:20411%09red/mmu:17128%09red/mmu:242687%09red/mmu:1291…
Sphingolipid signaling pathway	KEGG PATHWAY	mmu04071	41	123	0.000890998	0.00888132	ENSMUSG00000020366|ENSMUSG00000020349|ENSMUSG00000050511|ENSMUSG00000004508|ENSMUSG00000009630|ENSMUSG00000058715|ENSMUSG00000018012|ENSMUSG00000029053|ENSMUSG00000021054|ENSMUSG00000001847|ENSMUSG00000027665|ENSMUSG00000040061|ENSMUSG00000032562|ENSMUSG00000029120|ENSMUSG00000022052|ENSMUSG00000032058|ENSMUSG00000041769|ENSMUSG00000040451|ENSMUSG00000024401|ENSMUSG00000020611|ENSMUSG00000045092|…	http://www.genome.jp/kegg-bin/show_pathway?mmu04071/mmu:16653%09red/mmu:13033%09red/mmu:71978%09red/mmu:226849%09red/mmu:13244%09red/mmu:170758%09red/mmu:269643%09red/mmu:18706%09red/mmu:18707%09red/mmu:18762%09red/mmu:21926%09red/mmu:18607%09red/mmu:26415%09red/mmu:26414%09red/mmu:18386%09red/mmu:208449%09red/mmu:73699%09red/mmu:320207%09red/mmu:51792%09red/mmu:19354%09red/mmu:19053%09red/mmu:19…
Neurotrophin signaling pathway	KEGG PATHWAY	mmu04722	41	123	0.000890998	0.00888132	ENSMUSG00000020170|ENSMUSG00000048756|ENSMUSG00000042594|ENSMUSG00000020366|ENSMUSG00000019370|ENSMUSG00000031309|ENSMUSG00000068798|ENSMUSG00000025665|ENSMUSG00000016528|ENSMUSG00000025132|ENSMUSG00000036438|ENSMUSG00000034801|ENSMUSG00000052681|ENSMUSG00000035529|ENSMUSG00000021948|ENSMUSG00000027665|ENSMUSG00000053819|ENSMUSG00000021820|ENSMUSG00000030595|ENSMUSG00000021025|ENSMUSG00000001729|…	http://www.genome.jp/kegg-bin/show_pathway?mmu04722/mmu:16653%09red/mmu:17164%09red/mmu:215449%09red/mmu:12315%09red/mmu:12314%09red/mmu:22034%09red/mmu:72843%09red/mmu:18706%09red/mmu:18707%09red/mmu:192662%09red/mmu:18607%09red/mmu:26415%09red/mmu:110651%09red/mmu:26413%09red/mmu:18213%09red/mmu:320207%09red/mmu:12928%09red/mmu:18035%09red/mmu:18036%09red/mmu:17179%09red/mmu:16923%09red/mmu:206…
Phospholipase D signaling pathway	KEGG PATHWAY	mmu04072	46	144	0.000943483	0.00937003	ENSMUSG00000061878|ENSMUSG00000026825|ENSMUSG00000020431|ENSMUSG00000025856|ENSMUSG00000048376|ENSMUSG00000004508|ENSMUSG00000005534|ENSMUSG00000058715|ENSMUSG00000034801|ENSMUSG00000031714|ENSMUSG00000021457|ENSMUSG00000029231|ENSMUSG00000018001|ENSMUSG00000033335|ENSMUSG00000027665|ENSMUSG00000040061|ENSMUSG00000018008|ENSMUSG00000001211|ENSMUSG00000034731|ENSMUSG00000019966|ENSMUSG00000003269|…	http://www.genome.jp/kegg-bin/show_pathway?mmu04072/mmu:16653%09red/mmu:17311%09red/mmu:18798%09red/mmu:11651%09red/mmu:11840%09red/mmu:14127%09red/mmu:432530%09red/mmu:380921%09red/mmu:13429%09red/mmu:18720%09red/mmu:18706%09red/mmu:18707%09red/mmu:64143%09red/mmu:55979%09red/mmu:26413%09red/mmu:227333%09red/mmu:320207%09red/mmu:20130%09red/mmu:14683%09red/mmu:56508%09red/mmu:16337%09red/mmu:206…
ErbB signaling pathway	KEGG PATHWAY	mmu04012	32	88	0.000996988	0.00976724	ENSMUSG00000020366|ENSMUSG00000023067|ENSMUSG00000026596|ENSMUSG00000022781|ENSMUSG00000003031|ENSMUSG00000031714|ENSMUSG00000034801|ENSMUSG00000029377|ENSMUSG00000027665|ENSMUSG00000022346|ENSMUSG00000053819|ENSMUSG00000027646|ENSMUSG00000018166|ENSMUSG00000021820|ENSMUSG00000001729|ENSMUSG00000046709|ENSMUSG00000030265|ENSMUSG00000063358|ENSMUSG00000031490|ENSMUSG00000039936|ENSMUSG00000002948|…	http://www.genome.jp/kegg-bin/show_pathway?mmu04012/mmu:16653%09red/mmu:13685%09red/mmu:12576%09red/mmu:12575%09red/mmu:224105%09red/mmu:208650%09red/mmu:18706%09red/mmu:18707%09red/mmu:13867%09red/mmu:26414%09red/mmu:26413%09red/mmu:320207%09red/mmu:12928%09red/mmu:17973%09red/mmu:20663%09red/mmu:12325%09red/mmu:80794%09red/mmu:14388%09red/mmu:108058%09red/mmu:11651%09red/mmu:211323%09red/mmu:26…
EGFR tyrosine kinase inhibitor resistance	KEGG PATHWAY	mmu01521	30	81	0.00111695	0.0107118	ENSMUSG00000020053|ENSMUSG00000025856|ENSMUSG00000020516|ENSMUSG00000027381|ENSMUSG00000031714|ENSMUSG00000034801|ENSMUSG00000005533|ENSMUSG00000029231|ENSMUSG00000030849|ENSMUSG00000027646|ENSMUSG00000018166|ENSMUSG00000001729|ENSMUSG00000048756|ENSMUSG00000027947|ENSMUSG00000025746|ENSMUSG00000030265|ENSMUSG00000063358|ENSMUSG00000031490|ENSMUSG00000039936|ENSMUSG00000027665|ENSMUSG00000028019|…	http://www.genome.jp/kegg-bin/show_pathway?mmu01521/mmu:16653%09red/mmu:13685%09red/mmu:11651%09red/mmu:12125%09red/mmu:18706%09red/mmu:18707%09red/mmu:16193%09red/mmu:16194%09red/mmu:14184%09red/mmu:13867%09red/mmu:26413%09red/mmu:14183%09red/mmu:320207%09red/mmu:20848%09red/mmu:20663%09red/mmu:16451%09red/mmu:16001%09red/mmu:16000%09red/mmu:14388%09red/mmu:18590%09red/mmu:18595%09red/mmu:211323…
Salmonella infection	KEGG PATHWAY	mmu05132	29	78	0.0012764	0.0119925	ENSMUSG00000020009|ENSMUSG00000020366|ENSMUSG00000006304|ENSMUSG00000030793|ENSMUSG00000047193|ENSMUSG00000020826|ENSMUSG00000001847|ENSMUSG00000028917|ENSMUSG00000018293|ENSMUSG00000004591|ENSMUSG00000038195|ENSMUSG00000016024|ENSMUSG00000021288|ENSMUSG00000046709|ENSMUSG00000029465|ENSMUSG00000063358|ENSMUSG00000029379|ENSMUSG00000027398|ENSMUSG00000029621|ENSMUSG00000000982|ENSMUSG00000073982|…	http://www.genome.jp/kegg-bin/show_pathway?mmu05132/mmu:18643%09red/mmu:192176%09red/mmu:109333%09red/mmu:69582%09red/mmu:16193%09red/mmu:66824%09red/mmu:15979%09red/mmu:26415%09red/mmu:26414%09red/mmu:26413%09red/mmu:280408%09red/mmu:18126%09red/mmu:16593%09red/mmu:20302%09red/mmu:56212%09red/mmu:14825%09red/mmu:15980%09red/mmu:330122%09red/mmu:19349%09red/mmu:16803%09red/mmu:26420%09red/mmu:242…
Cytokine-cytokine receptor interaction	KEGG PATHWAY	mmu04060	73	264	0.00128655	0.0120698	ENSMUSG00000038067|ENSMUSG00000020009|ENSMUSG00000029417|ENSMUSG00000021756|ENSMUSG00000040329|ENSMUSG00000009185|ENSMUSG00000023078|ENSMUSG00000059327|ENSMUSG00000029648|ENSMUSG00000042333|ENSMUSG00000025746|ENSMUSG00000019122|ENSMUSG00000029711|ENSMUSG00000016529|ENSMUSG00000070904|ENSMUSG00000022971|ENSMUSG00000016524|ENSMUSG00000005824|ENSMUSG00000052430|ENSMUSG00000029231|ENSMUSG00000044337|…	http://www.genome.jp/kegg-bin/show_pathway?mmu04060/mmu:12986%09red/mmu:18829%09red/mmu:17311%09red/mmu:230979%09red/mmu:22035%09red/mmu:21941%09red/mmu:21943%09red/mmu:15976%09red/mmu:21812%09red/mmu:21938%09red/mmu:15975%09red/mmu:11479%09red/mmu:12167%09red/mmu:213208%09red/mmu:16193%09red/mmu:21926%09red/mmu:16194%09red/mmu:15979%09red/mmu:27279%09red/mmu:100042493%09red/mmu:16195%09red/mmu:5…
AGE-RAGE signaling pathway in diabetic complications	KEGG PATHWAY	mmu04933	35	102	0.0013611	0.0126488	ENSMUSG00000020366|ENSMUSG00000031273|ENSMUSG00000021367|ENSMUSG00000003031|ENSMUSG00000063358|ENSMUSG00000026193|ENSMUSG00000033016|ENSMUSG00000029053|ENSMUSG00000037405|ENSMUSG00000021948|ENSMUSG00000027665|ENSMUSG00000040061|ENSMUSG00000024515|ENSMUSG00000020937|ENSMUSG00000024401|ENSMUSG00000046709|ENSMUSG00000030265|ENSMUSG00000001847|ENSMUSG00000015340|ENSMUSG00000039936|ENSMUSG00000001729|…	http://www.genome.jp/kegg-bin/show_pathway?mmu04933/mmu:16653%09red/mmu:12576%09red/mmu:72469%09red/mmu:18706%09red/mmu:18707%09red/mmu:18762%09red/mmu:21926%09red/mmu:16193%09red/mmu:74055%09red/mmu:26415%09red/mmu:26414%09red/mmu:26413%09red/mmu:14268%09red/mmu:13614%09red/mmu:320207%09red/mmu:20848%09red/mmu:12826%09red/mmu:18018%09red/mmu:17126%09red/mmu:12827%09red/mmu:13367%09red/mmu:14066%…
Viral carcinogenesis	KEGG PATHWAY	mmu05203	64	226	0.00152695	0.0139745	ENSMUSG00000004698|ENSMUSG00000034165|ENSMUSG00000018965|ENSMUSG00000021457|ENSMUSG00000022521|ENSMUSG00000031666|ENSMUSG00000031585|ENSMUSG00000003031|ENSMUSG00000003184|ENSMUSG00000016528|ENSMUSG00000021756|ENSMUSG00000026313|ENSMUSG00000001847|ENSMUSG00000027665|ENSMUSG00000022475|ENSMUSG00000027641|ENSMUSG00000027646|ENSMUSG00000091705|ENSMUSG00000105827|ENSMUSG00000017007|ENSMUSG00000054808|…	http://www.genome.jp/kegg-bin/show_pathway?mmu05203/mmu:252870%09red/mmu:22630%09red/mmu:12576%09red/mmu:12575%09red/mmu:16653%09red/mmu:22031%09red/mmu:97122%09red/mmu:22033%09red/mmu:227753%09red/mmu:15182%09red/mmu:12579%09red/mmu:13205%09red/mmu:20684%09red/mmu:18706%09red/mmu:17164%09red/mmu:79221%09red/mmu:319190%09red/mmu:18707%09red/mmu:242341%09red/mmu:14997%09red/mmu:11472%09red/mmu:131…
B cell receptor signaling pathway	KEGG PATHWAY	mmu04662	27	72	0.00166664	0.0149184	ENSMUSG00000026616|ENSMUSG00000026656|ENSMUSG00000021457|ENSMUSG00000025017|ENSMUSG00000034801|ENSMUSG00000033016|ENSMUSG00000018012|ENSMUSG00000001847|ENSMUSG00000027665|ENSMUSG00000026288|ENSMUSG00000030595|ENSMUSG00000021025|ENSMUSG00000001729|ENSMUSG00000034116|ENSMUSG00000030265|ENSMUSG00000063358|ENSMUSG00000036526|ENSMUSG00000039936|ENSMUSG00000033953|ENSMUSG00000030577|ENSMUSG00000025491|…	http://www.genome.jp/kegg-bin/show_pathway?mmu04662/mmu:16653%09red/mmu:14130%09red/mmu:16331%09red/mmu:170758%09red/mmu:18706%09red/mmu:18707%09red/mmu:16332%09red/mmu:240168%09red/mmu:26413%09red/mmu:320207%09red/mmu:12902%09red/mmu:18035%09red/mmu:18036%09red/mmu:68713%09red/mmu:18018%09red/mmu:19058%09red/mmu:12483%09red/mmu:22324%09red/mmu:108723%09red/mmu:83490%09red/mmu:11651%09red/mmu:206…
Dopaminergic synapse	KEGG PATHWAY	mmu04728	41	129	0.00186249	0.0163288	ENSMUSG00000032766|ENSMUSG00000020366|ENSMUSG00000020349|ENSMUSG00000019370|ENSMUSG00000025037|ENSMUSG00000009630|ENSMUSG00000036402|ENSMUSG00000055116|ENSMUSG00000036438|ENSMUSG00000071658|ENSMUSG00000040061|ENSMUSG00000032562|ENSMUSG00000029120|ENSMUSG00000022052|ENSMUSG00000053819|ENSMUSG00000042644|ENSMUSG00000014956|ENSMUSG00000032058|ENSMUSG00000041769|ENSMUSG00000005034|ENSMUSG00000021820|…	http://www.genome.jp/kegg-bin/show_pathway?mmu04728/mmu:73699%09red/mmu:71978%09red/mmu:12315%09red/mmu:12314%09red/mmu:14683%09red/mmu:14710%09red/mmu:226849%09red/mmu:14680%09red/mmu:269643%09red/mmu:26415%09red/mmu:13490%09red/mmu:17161%09red/mmu:19047%09red/mmu:66066%09red/mmu:18749%09red/mmu:51792%09red/mmu:19053%09red/mmu:19052%09red/mmu:14709%09red/mmu:14702%09red/mmu:14678%09red/mmu:12325…
Central carbon metabolism in cancer	KEGG PATHWAY	mmu05230	25	66	0.00217555	0.0187104	ENSMUSG00000030110|ENSMUSG00000063229|ENSMUSG00000031565|ENSMUSG00000028645|ENSMUSG00000025161|ENSMUSG00000030849|ENSMUSG00000022346|ENSMUSG00000026103|ENSMUSG00000020277|ENSMUSG00000001729|ENSMUSG00000011752|ENSMUSG00000001918|ENSMUSG00000029231|ENSMUSG00000030265|ENSMUSG00000059146|ENSMUSG00000063358|ENSMUSG00000039936|ENSMUSG00000027665|ENSMUSG00000020901|ENSMUSG00000025499|ENSMUSG00000054252|…	http://www.genome.jp/kegg-bin/show_pathway?mmu05230/mmu:16653%09red/mmu:11651%09red/mmu:14660%09red/mmu:18641%09red/mmu:18706%09red/mmu:18707%09red/mmu:18648%09red/mmu:14184%09red/mmu:20525%09red/mmu:14182%09red/mmu:18213%09red/mmu:320207%09red/mmu:19713%09red/mmu:80879%09red/mmu:15277%09red/mmu:18595%09red/mmu:26413%09red/mmu:20514%09red/mmu:16828%09red/mmu:26396%09red/mmu:14183%09red/mmu:18746%…
Phagosome	KEGG PATHWAY	mmu04145	51	173	0.0021909	0.0187977	ENSMUSG00000007458|ENSMUSG00000059498|ENSMUSG00000039105|ENSMUSG00000038600|ENSMUSG00000026656|ENSMUSG00000047193|ENSMUSG00000019210|ENSMUSG00000016534|ENSMUSG00000036752|ENSMUSG00000037936|ENSMUSG00000031447|ENSMUSG00000006519|ENSMUSG00000030707|ENSMUSG00000001847|ENSMUSG00000025044|ENSMUSG00000022295|ENSMUSG00000024164|ENSMUSG00000015947|ENSMUSG00000091705|ENSMUSG00000019302|ENSMUSG00000038195|…	http://www.genome.jp/kegg-bin/show_pathway?mmu04145/mmu:17167%09red/mmu:11973%09red/mmu:271457%09red/mmu:22145%09red/mmu:14130%09red/mmu:16409%09red/mmu:11975%09red/mmu:20288%09red/mmu:27060%09red/mmu:66335%09red/mmu:16402%09red/mmu:227613%09red/mmu:21828%09red/mmu:22152%09red/mmu:21825%09red/mmu:242341%09red/mmu:14997%09red/mmu:22153%09red/mmu:66290%09red/mmu:19349%09red/mmu:140494%09red/mmu:280…
Cell cycle	KEGG PATHWAY	mmu04110	39	123	0.00244807	0.0205809	ENSMUSG00000024563|ENSMUSG00000002297|ENSMUSG00000036390|ENSMUSG00000023908|ENSMUSG00000018965|ENSMUSG00000023067|ENSMUSG00000066149|ENSMUSG00000029472|ENSMUSG00000029730|ENSMUSG00000022521|ENSMUSG00000022400|ENSMUSG00000003031|ENSMUSG00000014355|ENSMUSG00000026037|ENSMUSG00000025135|ENSMUSG00000040084|ENSMUSG00000022346|ENSMUSG00000027641|ENSMUSG00000027330|ENSMUSG00000019777|ENSMUSG00000028212|…	http://www.genome.jp/kegg-bin/show_pathway?mmu04110/mmu:12572%09red/mmu:12236%09red/mmu:26429%09red/mmu:12576%09red/mmu:12575%09red/mmu:59008%09red/mmu:12579%09red/mmu:15182%09red/mmu:12531%09red/mmu:17126%09red/mmu:211586%09red/mmu:20842%09red/mmu:13197%09red/mmu:19090%09red/mmu:218294%09red/mmu:56438%09red/mmu:268930%09red/mmu:22631%09red/mmu:22630%09red/mmu:26965%09red/mmu:12580%09red/mmu:1722…
RNA transport	KEGG PATHWAY	mmu03013	49	166	0.00258113	0.021516	ENSMUSG00000057000|ENSMUSG00000054582|ENSMUSG00000038374|ENSMUSG00000020265|ENSMUSG00000027680|ENSMUSG00000032939|ENSMUSG00000005610|ENSMUSG00000064030|ENSMUSG00000057561|ENSMUSG00000034681|ENSMUSG00000058301|ENSMUSG00000063550|ENSMUSG00000043241|ENSMUSG00000026083|ENSMUSG00000045983|ENSMUSG00000041319|ENSMUSG00000053293|ENSMUSG00000010097|ENSMUSG00000027236|ENSMUSG00000028809|ENSMUSG00000036941|…	http://www.genome.jp/kegg-bin/show_pathway?mmu03013/mmu:53319%09red/mmu:13685%09red/mmu:20918%09red/mmu:17149%09red/mmu:226982%09red/mmu:386612%09red/mmu:23879%09red/mmu:192170%09red/mmu:78428%09red/mmu:108067%09red/mmu:217869%09red/mmu:19386%09red/mmu:13690%09red/mmu:75826%09red/mmu:66161%09red/mmu:326622%09red/mmu:14265%09red/mmu:27979%09red/mmu:51796%09red/mmu:114615%09red/mmu:241989%09red/mmu…
cAMP signaling pathway	KEGG PATHWAY	mmu04024	56	197	0.00268965	0.0222496	ENSMUSG00000020366|ENSMUSG00000045502|ENSMUSG00000020431|ENSMUSG00000029778|ENSMUSG00000019370|ENSMUSG00000003123|ENSMUSG00000049241|ENSMUSG00000022521|ENSMUSG00000021699|ENSMUSG00000031842|ENSMUSG00000036437|ENSMUSG00000036438|ENSMUSG00000033016|ENSMUSG00000018012|ENSMUSG00000028525|ENSMUSG00000027665|ENSMUSG00000032562|ENSMUSG00000040907|ENSMUSG00000027523|ENSMUSG00000053819|ENSMUSG00000014956|…	http://www.genome.jp/kegg-bin/show_pathway?mmu04024/mmu:18749%09red/mmu:215449%09red/mmu:15245%09red/mmu:12315%09red/mmu:12314%09red/mmu:432530%09red/mmu:232975%09red/mmu:19206%09red/mmu:11517%09red/mmu:18706%09red/mmu:18707%09red/mmu:67821%09red/mmu:26414%09red/mmu:26413%09red/mmu:27222%09red/mmu:19047%09red/mmu:320207%09red/mmu:109648%09red/mmu:18035%09red/mmu:20130%09red/mmu:239273%09red/mmu:1…
Herpes simplex infection	KEGG PATHWAY	mmu05168	58	206	0.00272955	0.0225453	ENSMUSG00000020009|ENSMUSG00000057000|ENSMUSG00000020366|ENSMUSG00000031386|ENSMUSG00000005198|ENSMUSG00000022521|ENSMUSG00000042333|ENSMUSG00000021134|ENSMUSG00000091705|ENSMUSG00000055116|ENSMUSG00000029613|ENSMUSG00000005824|ENSMUSG00000025134|ENSMUSG00000015755|ENSMUSG00000100549|ENSMUSG00000022710|ENSMUSG00000010097|ENSMUSG00000024097|ENSMUSG00000042349|ENSMUSG00000014956|ENSMUSG00000062300|…	http://www.genome.jp/kegg-bin/show_pathway?mmu05168/mmu:53319%09red/mmu:231805%09red/mmu:20815%09red/mmu:252870%09red/mmu:22031%09red/mmu:230979%09red/mmu:22033%09red/mmu:19294%09red/mmu:237336%09red/mmu:15976%09red/mmu:15975%09red/mmu:20384%09red/mmu:15013%09red/mmu:16193%09red/mmu:21926%09red/mmu:110809%09red/mmu:67615%09red/mmu:54131%09red/mmu:26414%09red/mmu:18626%09red/mmu:68652%09red/mmu:18…
Protein processing in endoplasmic reticulum	KEGG PATHWAY	mmu04141	48	163	0.00294497	0.0239956	ENSMUSG00000045302|ENSMUSG00000000826|ENSMUSG00000020366|ENSMUSG00000002014|ENSMUSG00000071650|ENSMUSG00000027422|ENSMUSG00000075701|ENSMUSG00000055401|ENSMUSG00000022400|ENSMUSG00000031751|ENSMUSG00000042215|ENSMUSG00000029613|ENSMUSG00000025130|ENSMUSG00000020794|ENSMUSG00000046841|ENSMUSG00000023286|ENSMUSG00000041355|ENSMUSG00000005262|ENSMUSG00000027828|ENSMUSG00000019802|ENSMUSG00000009092|…	http://www.genome.jp/kegg-bin/show_pathway?mmu04141/mmu:227619%09red/mmu:20832%09red/mmu:109815%09red/mmu:226641%09red/mmu:67437%09red/mmu:64209%09red/mmu:50907%09red/mmu:69162%09red/mmu:69608%09red/mmu:56438%09red/mmu:140499%09red/mmu:18786%09red/mmu:26965%09red/mmu:66256%09red/mmu:66105%09red/mmu:81910%09red/mmu:15505%09red/mmu:13002%09red/mmu:17872%09red/mmu:12954%09red/mmu:56812%09red/mmu:703…
Glucagon signaling pathway	KEGG PATHWAY	mmu04922	33	100	0.00304229	0.0246774	ENSMUSG00000029513|ENSMUSG00000019370|ENSMUSG00000027936|ENSMUSG00000022521|ENSMUSG00000050697|ENSMUSG00000036438|ENSMUSG00000028645|ENSMUSG00000067713|ENSMUSG00000040061|ENSMUSG00000037112|ENSMUSG00000053819|ENSMUSG00000033953|ENSMUSG00000042644|ENSMUSG00000063229|ENSMUSG00000005034|ENSMUSG00000021820|ENSMUSG00000078650|ENSMUSG00000027523|ENSMUSG00000011752|ENSMUSG00000000394|ENSMUSG00000020277|…	http://www.genome.jp/kegg-bin/show_pathway?mmu04922/mmu:14526%09red/mmu:14527%09red/mmu:12315%09red/mmu:12314%09red/mmu:14683%09red/mmu:110095%09red/mmu:105787%09red/mmu:232493%09red/mmu:18648%09red/mmu:19079%09red/mmu:20525%09red/mmu:235344%09red/mmu:18749%09red/mmu:68734%09red/mmu:74343%09red/mmu:19058%09red/mmu:12325%09red/mmu:108058%09red/mmu:11651%09red/mmu:18679%09red/mmu:17691%09red/mmu:18…
TGF-beta signaling pathway	KEGG PATHWAY	mmu04350	29	84	0.00311288	0.0250253	ENSMUSG00000024563|ENSMUSG00000009630|ENSMUSG00000020349|ENSMUSG00000022521|ENSMUSG00000022400|ENSMUSG00000038780|ENSMUSG00000022346|ENSMUSG00000027641|ENSMUSG00000000532|ENSMUSG00000031681|ENSMUSG00000032058|ENSMUSG00000042745|ENSMUSG00000024401|ENSMUSG00000027358|ENSMUSG00000019929|ENSMUSG00000029686|ENSMUSG00000007564|ENSMUSG00000063358|ENSMUSG00000026834|ENSMUSG00000037035|ENSMUSG00000020516|…	http://www.genome.jp/kegg-bin/show_pathway?mmu04350/mmu:73699%09red/mmu:12579%09red/mmu:11479%09red/mmu:12167%09red/mmu:21825%09red/mmu:21926%09red/mmu:26413%09red/mmu:56438%09red/mmu:75788%09red/mmu:51792%09red/mmu:26965%09red/mmu:15901%09red/mmu:19053%09red/mmu:19052%09red/mmu:21815%09red/mmu:19650%09red/mmu:21812%09red/mmu:16323%09red/mmu:16324%09red/mmu:12156%09red/mmu:12914%09red/mmu:17869%0…
Apoptosis	KEGG PATHWAY	mmu04210	42	138	0.00318765	0.0255318	ENSMUSG00000028063|ENSMUSG00000026496|ENSMUSG00000046709|ENSMUSG00000036390|ENSMUSG00000053820|ENSMUSG00000026883|ENSMUSG00000046607|ENSMUSG00000029863|ENSMUSG00000027665|ENSMUSG00000054509|ENSMUSG00000016256|ENSMUSG00000068329|ENSMUSG00000042644|ENSMUSG00000022074|ENSMUSG00000021025|ENSMUSG00000024401|ENSMUSG00000032359|ENSMUSG00000071714|ENSMUSG00000038612|ENSMUSG00000025860|ENSMUSG00000030265|…	http://www.genome.jp/kegg-bin/show_pathway?mmu04210/mmu:16653%09red/mmu:13033%09red/mmu:17210%09red/mmu:13036%09red/mmu:13038%09red/mmu:22035%09red/mmu:12046%09red/mmu:12123%09red/mmu:18706%09red/mmu:18707%09red/mmu:21926%09red/mmu:13197%09red/mmu:18607%09red/mmu:235587%09red/mmu:26414%09red/mmu:26413%09red/mmu:11783%09red/mmu:69601%09red/mmu:320207%09red/mmu:18035%09red/mmu:13040%09red/mmu:12125…
Leishmaniasis	KEGG PATHWAY	mmu05140	24	65	0.00343484	0.0270325	ENSMUSG00000020009|ENSMUSG00000059498|ENSMUSG00000059089|ENSMUSG00000047945|ENSMUSG00000016529|ENSMUSG00000020826|ENSMUSG00000006519|ENSMUSG00000015947|ENSMUSG00000030595|ENSMUSG00000021025|ENSMUSG00000024401|ENSMUSG00000071715|ENSMUSG00000031392|ENSMUSG00000024164|ENSMUSG00000030786|ENSMUSG00000063358|ENSMUSG00000027398|ENSMUSG00000028530|ENSMUSG00000027164|ENSMUSG00000004864|ENSMUSG00000015755|…	http://www.genome.jp/kegg-bin/show_pathway?mmu05140/mmu:14131%09red/mmu:16409%09red/mmu:22034%09red/mmu:21926%09red/mmu:15979%09red/mmu:26415%09red/mmu:26413%09red/mmu:68652%09red/mmu:18035%09red/mmu:18036%09red/mmu:17972%09red/mmu:18126%09red/mmu:16451%09red/mmu:16415%09red/mmu:15980%09red/mmu:14129%09red/mmu:12266%09red/mmu:246256%09red/mmu:13057%09red/mmu:16176%09red/mmu:17969%09red/mmu:16179%…
Small cell lung cancer	KEGG PATHWAY	mmu05222	29	85	0.00357321	0.0277391	ENSMUSG00000026840|ENSMUSG00000003031|ENSMUSG00000026193|ENSMUSG00000020826|ENSMUSG00000059436|ENSMUSG00000027665|ENSMUSG00000022346|ENSMUSG00000026875|ENSMUSG00000025423|ENSMUSG00000024421|ENSMUSG00000021025|ENSMUSG00000001729|ENSMUSG00000019846|ENSMUSG00000026637|ENSMUSG00000031273|ENSMUSG00000028212|ENSMUSG00000025860|ENSMUSG00000021277|ENSMUSG00000015846|ENSMUSG00000039936|ENSMUSG00000001507|…	http://www.genome.jp/kegg-bin/show_pathway?mmu05222/mmu:16775%09red/mmu:12576%09red/mmu:22031%09red/mmu:22033%09red/mmu:66197%09red/mmu:16400%09red/mmu:17187%09red/mmu:18706%09red/mmu:18707%09red/mmu:16774%09red/mmu:14268%09red/mmu:11783%09red/mmu:320207%09red/mmu:18035%09red/mmu:23928%09red/mmu:12827%09red/mmu:12826%09red/mmu:12579%09red/mmu:17344%09red/mmu:16410%09red/mmu:22029%09red/mmu:22034%…
Rheumatoid arthritis	KEGG PATHWAY	mmu05323	28	81	0.00357694	0.0277482	ENSMUSG00000039105|ENSMUSG00000038600|ENSMUSG00000019210|ENSMUSG00000037405|ENSMUSG00000061353|ENSMUSG00000043613|ENSMUSG00000029648|ENSMUSG00000022015|ENSMUSG00000026166|ENSMUSG00000024401|ENSMUSG00000025383|ENSMUSG00000028238|ENSMUSG00000022295|ENSMUSG00000001750|ENSMUSG00000006273|ENSMUSG00000024121|ENSMUSG00000033379|ENSMUSG00000020566|ENSMUSG00000027398|ENSMUSG00000028111|ENSMUSG00000019302|…	http://www.genome.jp/kegg-bin/show_pathway?mmu05323/mmu:11973%09red/mmu:11975%09red/mmu:11433%09red/mmu:13038%09red/mmu:27060%09red/mmu:21943%09red/mmu:12519%09red/mmu:16193%09red/mmu:242341%09red/mmu:21926%09red/mmu:16415%09red/mmu:66290%09red/mmu:140494%09red/mmu:68775%09red/mmu:20315%09red/mmu:11964%09red/mmu:11966%09red/mmu:20297%09red/mmu:108664%09red/mmu:11984%09red/mmu:83430%09red/mmu:1425…
Jak-STAT signaling pathway	KEGG PATHWAY	mmu04630	47	161	0.00370658	0.0285774	ENSMUSG00000038067|ENSMUSG00000020027|ENSMUSG00000034165|ENSMUSG00000023092|ENSMUSG00000021756|ENSMUSG00000040329|ENSMUSG00000020009|ENSMUSG00000079415|ENSMUSG00000022521|ENSMUSG00000029711|ENSMUSG00000016529|ENSMUSG00000070904|ENSMUSG00000016524|ENSMUSG00000034801|ENSMUSG00000027665|ENSMUSG00000022346|ENSMUSG00000100549|ENSMUSG00000068227|ENSMUSG00000032405|ENSMUSG00000022971|ENSMUSG00000025423|…	http://www.genome.jp/kegg-bin/show_pathway?mmu04630/mmu:17210%09red/mmu:12575%09red/mmu:71872%09red/mmu:192157%09red/mmu:15976%09red/mmu:15975%09red/mmu:18707%09red/mmu:18706%09red/mmu:213208%09red/mmu:16193%09red/mmu:16195%09red/mmu:16194%09red/mmu:15979%09red/mmu:56469%09red/mmu:320207%09red/mmu:93672%09red/mmu:50929%09red/mmu:16164%09red/mmu:14600%09red/mmu:12803%09red/mmu:20848%09red/mmu:3292…
Amoebiasis	KEGG PATHWAY	mmu05146	35	110	0.00377116	0.0289853	ENSMUSG00000021125|ENSMUSG00000020431|ENSMUSG00000016529|ENSMUSG00000026840|ENSMUSG00000026193|ENSMUSG00000020826|ENSMUSG00000024524|ENSMUSG00000057726|ENSMUSG00000044734|ENSMUSG00000040061|ENSMUSG00000005034|ENSMUSG00000024421|ENSMUSG00000027523|ENSMUSG00000019846|ENSMUSG00000021403|ENSMUSG00000031273|ENSMUSG00000054808|ENSMUSG00000017831|ENSMUSG00000030786|ENSMUSG00000034792|ENSMUSG00000039936|…	http://www.genome.jp/kegg-bin/show_pathway?mmu05146/mmu:11846%09red/mmu:11847%09red/mmu:271457%09red/mmu:16775%09red/mmu:16774%09red/mmu:16409%09red/mmu:432530%09red/mmu:14680%09red/mmu:18706%09red/mmu:18707%09red/mmu:16193%09red/mmu:21926%09red/mmu:11472%09red/mmu:19349%09red/mmu:14268%09red/mmu:320207%09red/mmu:14683%09red/mmu:20706%09red/mmu:23928%09red/mmu:12827%09red/mmu:12826%09red/mmu:1874…
Phosphatidylinositol signaling system	KEGG PATHWAY	mmu04070	32	98	0.00396658	0.0302302	ENSMUSG00000058793|ENSMUSG00000019370|ENSMUSG00000026737|ENSMUSG00000030660|ENSMUSG00000036438|ENSMUSG00000026113|ENSMUSG00000027665|ENSMUSG00000040061|ENSMUSG00000021385|ENSMUSG00000026288|ENSMUSG00000020937|ENSMUSG00000024210|ENSMUSG00000042644|ENSMUSG00000022973|ENSMUSG00000034731|ENSMUSG00000003752|ENSMUSG00000057963|ENSMUSG00000060733|ENSMUSG00000015214|ENSMUSG00000032594|ENSMUSG00000030228|…	http://www.genome.jp/kegg-bin/show_pathway?mmu04070/mmu:74302%09red/mmu:12315%09red/mmu:12314%09red/mmu:72469%09red/mmu:53332%09red/mmu:18706%09red/mmu:18720%09red/mmu:233011%09red/mmu:16331%09red/mmu:18707%09red/mmu:18704%09red/mmu:16332%09red/mmu:74055%09red/mmu:18705%09red/mmu:227333%09red/mmu:320207%09red/mmu:104015%09red/mmu:269180%09red/mmu:271424%09red/mmu:27399%09red/mmu:217837%09red/mmu:…
Aldosterone-regulated sodium reabsorption	KEGG PATHWAY	mmu04960	17	40	0.00425603	0.0319451	ENSMUSG00000005534|ENSMUSG00000020053|ENSMUSG00000000216|ENSMUSG00000027665|ENSMUSG00000040907|ENSMUSG00000026576|ENSMUSG00000019970|ENSMUSG00000024122|ENSMUSG00000030340|ENSMUSG00000063358|ENSMUSG00000020901|ENSMUSG00000039936|ENSMUSG00000004988|ENSMUSG00000007107|ENSMUSG00000033161|ENSMUSG00000030265|ENSMUSG00000016327	http://www.genome.jp/kegg-bin/show_pathway?mmu04960/mmu:18607%09red/mmu:67821%09red/mmu:20276%09red/mmu:26413%09red/mmu:27222%09red/mmu:108017%09red/mmu:16653%09red/mmu:20393%09red/mmu:16000%09red/mmu:320207%09red/mmu:232975%09red/mmu:11928%09red/mmu:18706%09red/mmu:18707%09red/mmu:11931%09red/mmu:16337%09red/mmu:20278%09red
Endocrine resistance	KEGG PATHWAY	mmu01522	31	95	0.0045595	0.0338166	ENSMUSG00000020366|ENSMUSG00000020431|ENSMUSG00000027314|ENSMUSG00000020516|ENSMUSG00000003031|ENSMUSG00000032185|ENSMUSG00000034801|ENSMUSG00000005533|ENSMUSG00000018501|ENSMUSG00000027665|ENSMUSG00000027646|ENSMUSG00000005034|ENSMUSG00000027523|ENSMUSG00000020053|ENSMUSG00000046709|ENSMUSG00000030265|ENSMUSG00000020184|ENSMUSG00000063358|ENSMUSG00000039936|ENSMUSG00000001729|ENSMUSG00000027878|…	http://www.genome.jp/kegg-bin/show_pathway?mmu01522/mmu:16653%09red/mmu:18749%09red/mmu:12576%09red/mmu:12575%09red/mmu:432530%09red/mmu:54485%09red/mmu:13982%09red/mmu:18706%09red/mmu:18707%09red/mmu:26415%09red/mmu:26414%09red/mmu:26413%09red/mmu:59035%09red/mmu:320207%09red/mmu:14683%09red/mmu:17979%09red/mmu:13388%09red/mmu:16001%09red/mmu:16000%09red/mmu:17246%09red/mmu:11651%09red/mmu:20663…
Fc epsilon RI signaling pathway	KEGG PATHWAY	mmu04664	24	67	0.00467238	0.0344942	ENSMUSG00000020366|ENSMUSG00000021457|ENSMUSG00000004508|ENSMUSG00000058715|ENSMUSG00000034801|ENSMUSG00000018012|ENSMUSG00000001847|ENSMUSG00000027665|ENSMUSG00000026288|ENSMUSG00000024401|ENSMUSG00000046709|ENSMUSG00000034116|ENSMUSG00000030265|ENSMUSG00000024122|ENSMUSG00000063358|ENSMUSG00000039936|ENSMUSG00000001729|ENSMUSG00000002948|ENSMUSG00000020901|ENSMUSG00000025499|ENSMUSG00000004864|…	http://www.genome.jp/kegg-bin/show_pathway?mmu04664/mmu:16653%09red/mmu:14127%09red/mmu:16331%09red/mmu:170758%09red/mmu:18706%09red/mmu:18707%09red/mmu:21926%09red/mmu:18607%09red/mmu:26415%09red/mmu:26414%09red/mmu:26413%09red/mmu:320207%09red/mmu:20663%09red/mmu:22324%09red/mmu:14389%09red/mmu:11651%09red/mmu:26400%09red/mmu:20963%09red/mmu:26420%09red/mmu:26396%09red/mmu:26397%09red/mmu:19354…
Inositol phosphate metabolism	KEGG PATHWAY	mmu00562	25	71	0.00471173	0.0346902	ENSMUSG00000026737|ENSMUSG00000024867|ENSMUSG00000029055|ENSMUSG00000026113|ENSMUSG00000027665|ENSMUSG00000040061|ENSMUSG00000021385|ENSMUSG00000026288|ENSMUSG00000020937|ENSMUSG00000022973|ENSMUSG00000003752|ENSMUSG00000057963|ENSMUSG00000032737|ENSMUSG00000015214|ENSMUSG00000030228|ENSMUSG00000039936|ENSMUSG00000060733|ENSMUSG00000030660|ENSMUSG00000034354|ENSMUSG00000039943|ENSMUSG00000028126|…	http://www.genome.jp/kegg-bin/show_pathway?mmu00562/mmu:74302%09red/mmu:17330%09red/mmu:72469%09red/mmu:53332%09red/mmu:16331%09red/mmu:18720%09red/mmu:233011%09red/mmu:18706%09red/mmu:18707%09red/mmu:18704%09red/mmu:16332%09red/mmu:18705%09red/mmu:104015%09red/mmu:269180%09red/mmu:269615%09red/mmu:74055%09red/mmu:21991%09red/mmu:217837%09red/mmu:18719%09red/mmu:18718%09red/mmu:69718%09red/mmu:75…
Circadian rhythm	KEGG PATHWAY	mmu04710	14	30	0.00482043	0.0352037	ENSMUSG00000067713|ENSMUSG00000028150|ENSMUSG00000029686|ENSMUSG00000025162|ENSMUSG00000032238|ENSMUSG00000029513|ENSMUSG00000022433|ENSMUSG00000022124|ENSMUSG00000022400|ENSMUSG00000030103|ENSMUSG00000050697|ENSMUSG00000055116|ENSMUSG00000020893|ENSMUSG00000068742	http://www.genome.jp/kegg-bin/show_pathway?mmu04710/mmu:19082%09red/mmu:19079%09red/mmu:50789%09red/mmu:56438%09red/mmu:18626%09red/mmu:105787%09red/mmu:26965%09red/mmu:12953%09red/mmu:104318%09red/mmu:19883%09red/mmu:11865%09red/mmu:20893%09red/mmu:27373%09red/mmu:19885%09red
Staphylococcus aureus infection	KEGG PATHWAY	mmu05150	20	52	0.00501579	0.0364586	ENSMUSG00000037405|ENSMUSG00000052270|ENSMUSG00000036905|ENSMUSG00000090231|ENSMUSG00000045551|ENSMUSG00000024164|ENSMUSG00000030786|ENSMUSG00000026656|ENSMUSG00000040552|ENSMUSG00000049130|ENSMUSG00000015947|ENSMUSG00000059498|ENSMUSG00000059089|ENSMUSG00000016529|ENSMUSG00000036887|ENSMUSG00000079343|ENSMUSG00000056529|ENSMUSG00000048163|ENSMUSG00000036896|ENSMUSG00000000157	http://www.genome.jp/kegg-bin/show_pathway?mmu05150/mmu:12267%09red/mmu:14293%09red/mmu:14131%09red/mmu:14130%09red/mmu:16409%09red/mmu:20345%09red/mmu:12273%09red/mmu:19204%09red/mmu:246256%09red/mmu:14129%09red/mmu:14962%09red/mmu:12266%09red/mmu:14289%09red/mmu:12262%09red/mmu:12260%09red/mmu:317677%09red/mmu:15894%09red/mmu:12259%09red/mmu:16153%09red/mmu:16415%09red
Mineral absorption	KEGG PATHWAY	mmu04978	18	45	0.00548613	0.039272	ENSMUSG00000026576|ENSMUSG00000029188|ENSMUSG00000027015|ENSMUSG00000040907|ENSMUSG00000005413|ENSMUSG00000001225|ENSMUSG00000021565|ENSMUSG00000040808|ENSMUSG00000050708|ENSMUSG00000026177|ENSMUSG00000033688|ENSMUSG00000022479|ENSMUSG00000031762|ENSMUSG00000024661|ENSMUSG00000007107|ENSMUSG00000033161|ENSMUSG00000027365|ENSMUSG00000016327	http://www.genome.jp/kegg-bin/show_pathway?mmu04978/mmu:67821%09red/mmu:74338%09red/mmu:20531%09red/mmu:14319%09red/mmu:27222%09red/mmu:12309%09red/mmu:15368%09red/mmu:58800%09red/mmu:18173%09red/mmu:232975%09red/mmu:17750%09red/mmu:73649%09red/mmu:22337%09red/mmu:13487%09red/mmu:11928%09red/mmu:71775%09red/mmu:14325%09red/mmu:11931%09red
Renal cell carcinoma	KEGG PATHWAY	mmu05211	23	66	0.00720907	0.0487118	ENSMUSG00000022781|ENSMUSG00000022400|ENSMUSG00000068798|ENSMUSG00000031714|ENSMUSG00000034801|ENSMUSG00000052681|ENSMUSG00000028645|ENSMUSG00000001847|ENSMUSG00000027665|ENSMUSG00000055839|ENSMUSG00000001729|ENSMUSG00000030265|ENSMUSG00000063358|ENSMUSG00000058709|ENSMUSG00000039936|ENSMUSG00000074923|ENSMUSG00000022521|ENSMUSG00000020901|ENSMUSG00000025499|ENSMUSG00000026526|ENSMUSG00000035105|…	http://www.genome.jp/kegg-bin/show_pathway?mmu05211/mmu:16653%09red/mmu:215449%09red/mmu:224105%09red/mmu:67673%09red/mmu:18706%09red/mmu:18707%09red/mmu:26413%09red/mmu:56438%09red/mmu:320207%09red/mmu:12928%09red/mmu:20663%09red/mmu:109905%09red/mmu:112407%09red/mmu:112406%09red/mmu:14388%09red/mmu:11651%09red/mmu:214230%09red/mmu:26396%09red/mmu:14194%09red/mmu:12914%09red/mmu:19353%09red/mmu:…
